# Supplementary material for: Oxidative Stress Induced Dysfunction of Protein Synthesis in 661W Mice Photoreceptor Cells
Source: MDPI journal article supplement (doi:10.3390/proteomes11020012), 2023-04-03
Supplement: s1 [file s1]

Supplementary Figures for Deng et al, 4 Dec 2022

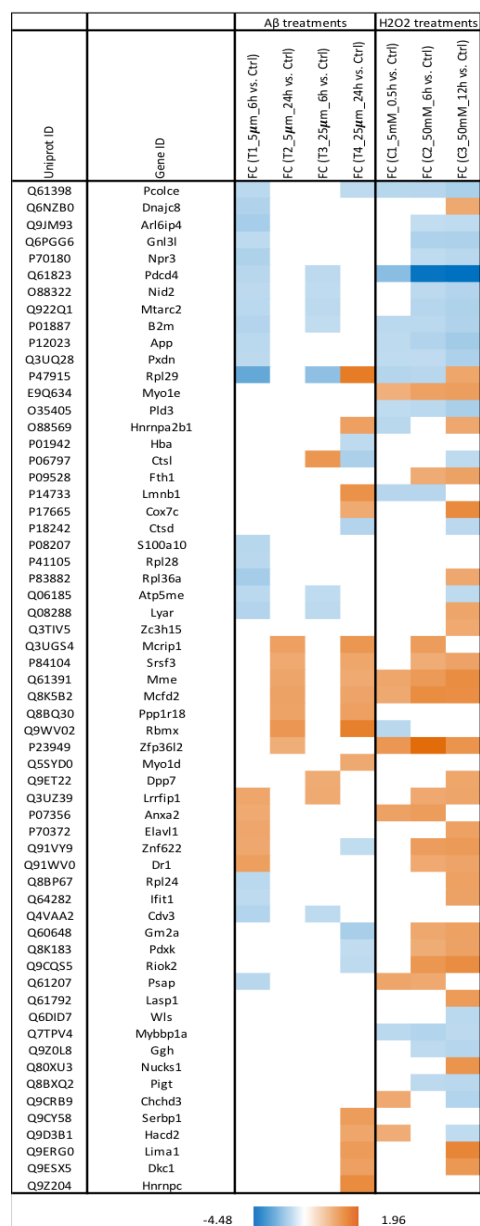

**Supplementary Figure S1.** Heat map table of differentially expressed proteins in 661W cells treated by H<sub>2</sub>O<sub>2</sub> and Aβ when compared to the control. Orange and blue bars represent the proteins increased and decreased in abundance in specific treatments.

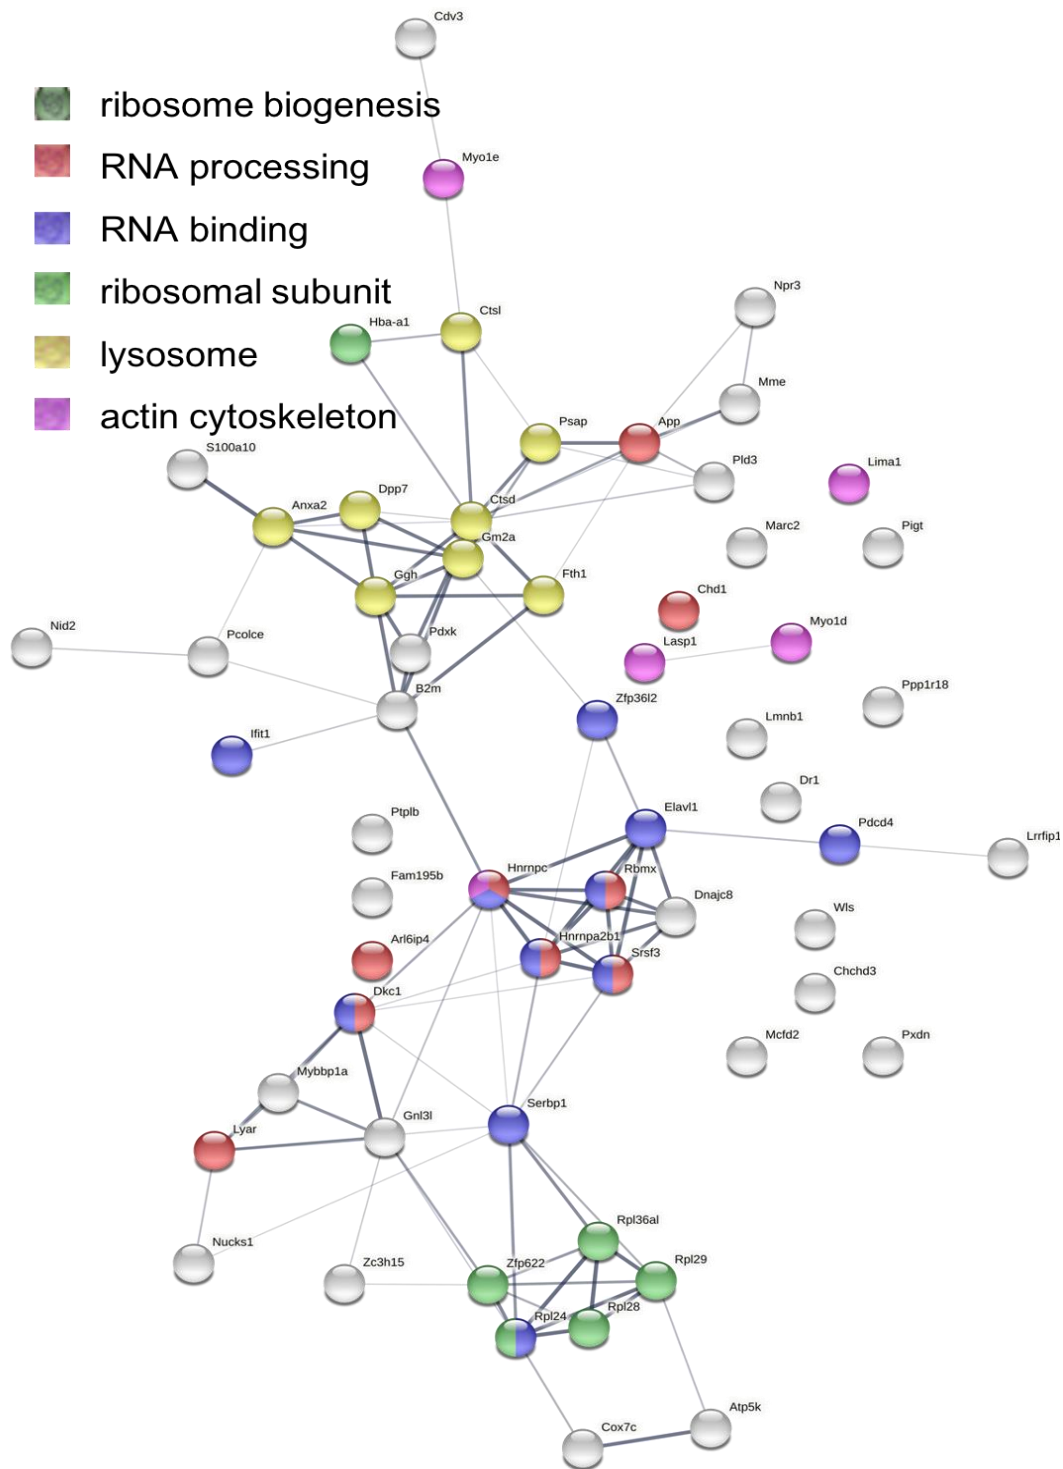

**Supplementary Figure S2.** Network analysis of 61 commonly regulated proteins by both  $H_2O_2$  and A $\beta$  in 661 photoreceptor cells. Six colors separately indicate proteins in three groups including biological process, molecular function, and cellular components after GO enrichment analysis.
