# Supplementary material for: Oxidative Stress Induced Dysfunction of Protein Synthesis in 661W Mice Photoreceptor Cells
Source: Proteomes. 2023 Apr 3;11(2):12. doi: 10.3390/proteomes11020012 (PMC10123756; doi:10.3390/proteomes11020012)
Supplement: Supplementary file 1 [file proteomes-11-00012-s001.zip]

Archive with 4 entries (4 files):
- Deng et al Supplementary Figures 4dec22.pdf
- Deng et al Supplementary Table 1 16Feb23.xlsx
- Deng et al Supplementary Table 2 3Mar2023.xlsx
- Deng et al Supplementary Table 3 16feb23.xlsx
