# Supplementary material for: Oxidative Stress Induced Dysfunction of Protein Synthesis in 661W Mice Photoreceptor Cells
Source: Proteomes. 2023 Apr 3;11(2):12. doi: 10.3390/proteomes11020012 (PMC10123756; doi:10.3390/proteomes11020012)
Supplement: Supplementary file 1 [file proteomes-11-00012-s001.zip › Deng et al Supplementary Table 1 16Feb23.xlsx]

## Sheet: Parameters
Parameter	Cutoff
P value	0.05
Fold change	1.2			TMT Labelling
					TMT1	TMT2	TMT3
				126_reference	Control_1	Control_2	Control_3
				127N	10µM H2O2_0.5h_1	10µM H2O2_0.5h_2	10µM H2O2_0.5h_3
				127C	50µM H2O2_6h_1	50µM H2O2_6h_2	50µM H2O2_6h_3
				128N	50µM H2O2_12h_1	50µM H2O2_12h_2	50µM H2O2_12h_3

## Sheet: AllData
Accession	Description	Counts1.x	Counts1.y	Counts1	R1.Abundance.127N	R2.Abundance.127N	R3.Abundance.127N	R1.Abundance.127C	R2.Abundance.127C	R3.Abundance.127C	R1.Abundance.128N	R2.Abundance.128N	R3.Abundance.128N	R1.Abundance.126	R2.Abundance.126	R3.Abundance.126	Means.C1	Means.C2	Means.C3	Means.Control	MaxFC	Anova	Anova.adj	Clusters
Q9D7G0	Ribose-phosphate pyrophosphokinase 1 OS=Mus musculus OX=10090 GN=Prps1 PE=1 SV=4	14	7	13	1912.86	1824.69	1935.4	1725.37	1642.13	1823.15	2233.77	2212.83	1966.74	1675.05	1867.39	1821.76	1890.37	1728.64	2134.24	1786.15	1.23464	0.00694228	0.0381875	1
Q9QXS6	Drebrin OS=Mus musculus OX=10090 GN=Dbn1 PE=1 SV=4	6	8	6	946.13	932.89	912.781	957.909	924.625	1005.59	1086.22	1205.98	1096.75	994.611	921.37	969.747	930.499	962.137	1128.38	961.425	1.21266	0.00192705	0.0173488	1
P56873	Sjoegren syndrome/scleroderma autoantigen 1 homolog OS=Mus musculus OX=10090 GN=Sssca1 PE=1 SV=1	3	5	2	283.813	300.227	272.953	266.104	269.181	243.083	374.743	326.066	373.441	253.284	282.471	288.467	285.445	259.189	357.345	274.3	1.3787	0.0013935	0.0143453	1
Q8BQ30	Phostensin OS=Mus musculus OX=10090 GN=Ppp1r18 PE=1 SV=1	1	2	1	165.195	158.982	168.615	179.328	171.323	204.172	214.326	214.566	207.843	188.696	202.673	166.915	164.215	184.425	212.222	185.503	1.29234	0.0131177	0.0568392	1
Q9ESX5	H/ACA ribonucleoprotein complex subunit 4 OS=Mus musculus OX=10090 GN=Dkc1 PE=1 SV=4	1	2	3	153.233	163.993	147.476	187.395	148.241	168.655	221.344	219.121	206.42	135.514	166.132	174.934	154.751	167.331	215.527	157.92	1.39273	0.00950753	0.0458161	1
Q62523	Zyxin OS=Mus musculus OX=10090 GN=Zyx PE=1 SV=2	17	15	17	1811.71	1974.52	1920.38	2110.91	2138.17	2143.52	2835	2515.37	2386.07	1868.66	1998.21	2176.3	1900.99	2130.82	2572.05	2010.47	1.35301	0.00180697	0.0166102	1
Q6P8I4	PEST proteolytic signal-containing nuclear protein OS=Mus musculus OX=10090 GN=Pcnp PE=1 SV=1	6	3	4	900.535	857.264	1085.79	872.544	952.556	1083.12	1857.45	1857.32	1437.39	999.502	962.896	1023.73	942.874	965.573	1705.27	995.062	1.80859	0.000508027	0.00795852	1
Q64339	Ubiquitin-like protein ISG15 OS=Mus musculus OX=10090 GN=Isg15 PE=1 SV=4	6	4	6	846.704	848.558	1023.75	1208.84	1056.68	1143.66	1381.98	1456.06	1168.42	973.476	1049.71	1075.17	902.685	1134.67	1329.72	1031.87	1.47307	0.00461932	0.0298029	1
P51125-3	Isoform 3 of Calpastatin OS=Mus musculus OX=10090 GN=Cast	15	15	21	2508.76	2738.76	2554.38	3152.7	3102.93	3262.08	4022.57	3751.17	3461.56	2578.54	2669.71	2984.54	2598.76	3171.88	3738.07	2738.87	1.4384	0.000301775	0.00624319	1
Q9Z1X4	Interleukin enhancer-binding factor 3 OS=Mus musculus OX=10090 GN=Ilf3 PE=1 SV=2	6	6	9	1352.76	1204.11	1311.53	1423.5	1498.36	1400.77	1649.15	1676.48	1677.39	1661.09	1707.55	1696.82	1287.92	1440.28	1667.62	1688.37	1.31093	4.19915e-05	0.00187322	1
Q9CXL3	Uncharacterized protein C7orf50 homolog OS=Mus musculus OX=10090 PE=1 SV=3	1	3	1	308.728	288.534	294.643	269.269	299.082	290.689	567.15	542.856	537.316	301.222	315.897	323.721	297.182	286.067	548.956	313.473	1.91898	1.14127e-07	9.8089e-05	1
Q9Z1R9	MCG124046 OS=Mus musculus OX=10090 GN=Prss1 PE=1 SV=1	4	5	6	2284.98	2387.68	2316.27	2541.88	2267.74	2452.54	2669.12	2807.01	2934.54	2506.88	2540.42	2299.5	2329.25	2417.99	2801.46	2446.57	1.20273	0.00698655	0.0383617	1
Q642K5	40S ribosomal protein S30 OS=Mus musculus OX=10090 GN=Fau PE=1 SV=1	1	1	2	310.565	289.42	351.432	379.388	331.482	476.039	1899.16	2002.89	1725.28	336.196	301.511	372.56	316.112	391.197	1872.23	335.504	5.92269	2.65794e-07	0.00011318	1
O70439	Syntaxin-7 OS=Mus musculus OX=10090 GN=Stx7 PE=1 SV=3	2	6	3	153.034	158.93	163.845	169.609	172.381	176.392	202.325	189.252	183.032	156.588	160.994	158.288	158.541	172.772	191.369	158.613	1.20706	0.000321927	0.00647171	1
Q60598	Src substrate cortactin OS=Mus musculus OX=10090 GN=Cttn PE=1 SV=2	13	18	20	5239.75	5527.55	5638.67	5912.79	6101.59	5944.57	7040.36	6639.27	6286.68	5290.84	5215.34	5613.83	5466.05	5985.75	6648.32	5370.59	1.23791	0.000663586	0.00927832	1
Q8VC85	U6 snRNA-associated Sm-like protein LSm1 OS=Mus musculus OX=10090 GN=Lsm1 PE=1 SV=1	3	2	3	72.6299	77.2407	77.9672	77.1808	70.0068	75.4689	92.5102	95.3528	80.0463	72.0366	71.7572	80.8751	75.9086	74.1548	89.0474	74.7729	1.20083	0.0280512	0.0936878	1
P05202	Aspartate aminotransferase, mitochondrial OS=Mus musculus OX=10090 GN=Got2 PE=1 SV=1	24	25	28	10104.1	10486	11313.1	11141.2	10757.3	11714.4	13955.6	13541.8	11817.5	10606.1	11021.8	10961.9	10622.6	11197.4	13071.2	10861.7	1.23051	0.00909036	0.044763	1
Q9CY58	Plasminogen activator inhibitor 1 RNA-binding protein OS=Mus musculus OX=10090 GN=Serbp1 PE=1 SV=2	12	7	10	1417.99	1284.06	1403.05	1305.08	1769.97	1325.14	2010.57	1957.85	1890.14	1658.81	1380.58	1774.13	1367.03	1451.96	1952.23	1595.69	1.42808	0.0208835	0.0772047	1
P70460	Vasodilator-stimulated phosphoprotein OS=Mus musculus OX=10090 GN=Vasp PE=1 SV=4	4	4	4	966.488	944.489	837.708	1000.49	1065.5	1059.57	1168.6	1097.38	1325.72	953.395	981.605	865.982	914.455	1041.44	1193.51	932.337	1.30516	0.00670234	0.0373783	1
Q8BGT7	Survival of motor neuron-related-splicing factor 30 OS=Mus musculus OX=10090 GN=Smndc1 PE=1 SV=1	2	3	3	409.401	393.969	414.048	395.102	444.336	398.484	497.433	480.459	543.45	411.204	394.375	357.157	405.715	412.044	506.427	386.909	1.30891	0.00249705	0.0200277	1
P28667	MARCKS-related protein OS=Mus musculus OX=10090 GN=Marcksl1 PE=1 SV=2	6	7	6	850.959	885.838	740.152	810.737	761.886	874.476	957.625	1034.18	1006.75	832.573	769.99	830.512	823.243	814.403	999.014	810.496	1.2326	0.0116709	0.0523405	1
Q8K124	Pleckstrin homology domain-containing family O member 2 OS=Mus musculus OX=10090 GN=Plekho2 PE=1 SV=1	5	6	5	311.618	345.801	317.723	355.162	330.846	361.615	419.134	397.519	391.178	307.981	319.729	323.379	324.713	348.953	402.434	316.961	1.26967	0.000522294	0.00810075	1
O08583	THO complex subunit 4 OS=Mus musculus OX=10090 GN=Alyref PE=1 SV=3	1	4	4	473.406	421.362	427.028	479.065	483.062	471.313	487.235	522.914	541.84	525.753	538.12	525.278	439.995	477.789	516.829	529.684	1.20384	0.00282341	0.0217872	1
Q99PG2	Opioid growth factor receptor OS=Mus musculus OX=10090 GN=Ogfr PE=1 SV=1	6	8	8	963.755	1032	990.551	862.259	1075.43	1052.74	1735.87	1348.02	1515.25	912.46	1018.89	915.804	995.042	992.003	1524.87	947.797	1.60886	0.000849513	0.0106091	1
P47955	60S acidic ribosomal protein P1 OS=Mus musculus OX=10090 GN=Rplp1 PE=1 SV=1	4	6	5	850.361	808.432	874.8	852.394	961.566	854.114	1098.81	975.073	1032.87	867.299	923.789	907.078	844.083	887.93	1034.35	899.074	1.22541	0.00776614	0.0407211	1
Q8CI51	PDZ and LIM domain protein 5 OS=Mus musculus OX=10090 GN=Pdlim5 PE=1 SV=4	24	19	17	3821.58	3603.71	3532.5	3940.6	4159.63	4133.08	4209.91	4461.1	4622.08	3832.58	3580.22	3517.01	3650.55	4076.59	4427.76	3640.76	1.21617	0.0010216	0.0119929	1
P61957	Small ubiquitin-related modifier 2 OS=Mus musculus OX=10090 GN=Sumo2 PE=1 SV=1	2	2	1	280.615	270.734	257.841	316.322	320.711	328.15	340.098	348.259	350.852	290.428	287.759	290.62	269.568	321.691	346.372	289.599	1.28492	7.69013e-06	0.000720412	1
B2RRE7	OTU domain-containing protein 4 OS=Mus musculus OX=10090 GN=Otud4 PE=1 SV=1	2	2	2	175.736	168.91	169.123	163.455	188.34	182.81	215.394	213.009	217.768	176.756	161.082	161.64	171.227	177.874	215.382	166.338	1.29485	0.000629873	0.00907688	1
Q9D7X8	Gamma-glutamylcyclotransferase OS=Mus musculus OX=10090 GN=Ggct PE=1 SV=1	2	2	3	427.731	471.158	467.095	525.998	515.689	540.998	630.195	560.473	518.044	423.217	459.822	481.005	454.898	527.459	567.717	454.047	1.25035	0.00705105	0.038538	1
Q80XU3	Nuclear ubiquitous casein and cyclin-dependent kinase substrate 1 OS=Mus musculus OX=10090 GN=Nucks1 PE=1 SV=1	5	3	11	696.161	675.344	685.684	780.605	723.918	754.734	993.418	1137.76	951	716.686	649.849	795.453	685.677	752.728	1024.36	718.211	1.49395	0.000520305	0.00809671	1
Q9DD18	D-aminoacyl-tRNA deacylase 1 OS=Mus musculus OX=10090 GN=Dtd1 PE=1 SV=2	1	1	1	542.712	533.141	576.693	584.586	573.005	598.086	706.614	689.102	638.298	529.743	568.406	550.578	550.536	585.136	677.376	549.348	1.23305	0.000566736	0.0085632	1
Q6PHQ9	Polyadenylate-binding protein OS=Mus musculus OX=10090 GN=Pabpc4 PE=1 SV=1	5	6	5	1431.66	1360.61	1458.56	1408.34	1555.73	1357.73	1827.81	1673.99	1768.12	1468.89	1546.37	1552.29	1416.34	1438.2	1755.49	1522.04	1.23946	0.00217521	0.0183762	1
Q08288	Cell growth-regulating nucleolar protein OS=Mus musculus OX=10090 GN=Lyar PE=1 SV=2	6	2	3	259.918	235.791	220.055	251.186	256.017	238.138	290.647	310.77	322.244	249.574	248.747	270.888	238.03	248.331	307.607	256.202	1.2923	0.00295303	0.0224911	1
Q9DCE9	Interferon gamma-induced GTPase OS=Mus musculus OX=10090 GN=Igtp PE=1 SV=1	4	6	4	921.017	962.014	930.565	1001.76	1018.12	1052.68	1161	1134.37	1108.66	1001.73	971.011	993.608	937.703	1023.97	1134.48	988.698	1.20984	3.75255e-05	0.00178045	1
Q9D0I8	mRNA turnover protein 4 homolog OS=Mus musculus OX=10090 GN=Mrto4 PE=1 SV=1	2	4	2	784.123	729.475	716.064	671.831	727.606	661.043	826.309	809.767	862.757	747.426	762.841	789.825	742.646	686.218	832.652	766.498	1.21339	0.00296219	0.0225242	1
Q3UMC0	Spermatogenesis-associated protein 5 OS=Mus musculus OX=10090 GN=Spata5 PE=1 SV=2	6	5	5	239.612	233.192	219.188	246.498	259.794	259.981	289.019	308.176	310.151	258.04	232.007	243.849	230.504	255.345	302.296	244.401	1.31145	0.000315291	0.00637868	1
Q8VHM5	Heterogeneous nuclear ribonucleoprotein R OS=Mus musculus OX=10090 GN=Hnrnpr PE=1 SV=1	7	6	6	514.436	472.561	480.495	548.284	601.864	608.208	670.393	699.908	680.029	565.831	524.611	530.212	488.832	585.489	683.334	539.914	1.39789	8.04333e-05	0.00273007	1
Q8K4Z5	Splicing factor 3A subunit 1 OS=Mus musculus OX=10090 GN=Sf3a1 PE=1 SV=1	8	10	8	1555.67	1520.98	1566.7	1589.51	1613.66	1685.54	1930.54	1826.07	1834.9	1666.15	1781.16	1654.74	1547.66	1629.06	1863.24	1699.74	1.20391	0.000476497	0.00768425	1
Q61792	LIM and SH3 domain protein 1 OS=Mus musculus OX=10090 GN=Lasp1 PE=1 SV=1	11	10	14	1558.2	1513.07	1498.23	1624.31	1629.17	1675.12	2055.23	2102.8	2161.11	1614.18	1606.88	1517.47	1522.95	1642.71	2105.94	1578.89	1.3828	1.01246e-06	0.000225547	1
P42337	Phosphatidylinositol 4,5-bisphosphate 3-kinase catalytic subunit alpha isoform OS=Mus musculus OX=10090 GN=Pik3ca PE=1 SV=2	3	4	1	198.516	208.874	197.45	195.522	201.288	168.911	225.703	226.714	261.305	207.973	190.837	200.047	201.548	188.028	237.349	199.496	1.26231	0.0158597	0.064485	1
P10649	Glutathione S-transferase Mu 1 OS=Mus musculus OX=10090 GN=Gstm1 PE=1 SV=2	13	16	15	5613.43	5954.32	6026.3	6742.39	6140	7012.19	7557.3	7831.92	7430.26	6387.64	6374.51	5832.01	5861.89	6621.33	7604.66	6192.53	1.29731	0.000983696	0.0117495	1
P09528	Ferritin heavy chain OS=Mus musculus OX=10090 GN=Fth1 PE=1 SV=2	7	6	6	961.951	958.453	1042.45	1048.79	1071.42	1129.94	1253.95	1274.77	1075.43	976.348	936.405	993.223	986.87	1082.85	1197.93	968.363	1.23707	0.00715326	0.0389151	1
P97371	Proteasome activator complex subunit 1 OS=Mus musculus OX=10090 GN=Psme1 PE=1 SV=2	18	18	18	2976.7	3183.17	3198.36	3580.24	3428.65	3628.48	3939.74	3870.21	3877.78	3376.74	3391.4	3168.81	3117.75	3544.76	3895.79	3310.73	1.24955	0.000149822	0.00386097	1
P63325	40S ribosomal protein S10 OS=Mus musculus OX=10090 GN=Rps10 PE=1 SV=1	7	8	8	1875.52	1751.98	1736.33	1866.81	2061.31	1976.94	2211.51	2225.85	2217.41	1946.93	1861.64	1970.11	1786.88	1966.73	2218.25	1925.66	1.24141	0.000565266	0.0085632	1
P49312	Heterogeneous nuclear ribonucleoprotein A1 OS=Mus musculus OX=10090 GN=Hnrnpa1 PE=1 SV=2	4	4	6	1012.52	826.032	914.848	933.648	1058.33	951.678	1063.67	1139.05	1113.84	1089.21	1075.63	1118.68	914.638	979.712	1105.07	1094.36	1.20821	0.0189964	0.0726952	1
Q62376	U1 small nuclear ribonucleoprotein 70 kDa OS=Mus musculus OX=10090 GN=Snrnp70 PE=1 SV=2	1	3	2	124.718	127.8	121.008	131.479	118.307	122.717	165.835	149.199	151.05	109.322	136.049	136.58	124.478	124.049	155.186	126.647	1.25101	0.0185255	0.0715951	1
E9Q852	Afadin OS=Mus musculus OX=10090 GN=Afdn PE=1 SV=2	3	1	2	182.825	216.259	240.779	206.833	223.775	201.57	292.908	248.215	259.554	226.691	221.008	207.354	211.938	210.517	266.233	218.199	1.26467	0.0355228	0.108657	1
P46938	Transcriptional coactivator YAP1 OS=Mus musculus OX=10090 GN=Yap1 PE=1 SV=2	3	6	6	155.363	195.067	178.674	221.659	203.379	194.824	235.139	210.05	213.869	189.39	193.055	214.185	175.603	206.322	219.414	198.583	1.24949	0.0478177	0.133162	1
O88569	Heterogeneous nuclear ribonucleoproteins A2/B1 OS=Mus musculus OX=10090 GN=Hnrnpa2b1 PE=1 SV=2	7	11	9	3768.13	3144.41	3208.36	3689.33	4081.19	4200.42	4685.09	4662.36	4861.55	4066.5	4321.08	3938.7	3362.4	3984.21	4735.51	4105.71	1.40837	0.00159041	0.0153915	1
Q4VAA2	Protein CDV3 OS=Mus musculus OX=10090 GN=Cdv3 PE=1 SV=2	4	7	5	631.222	634.804	682.537	702.193	703.213	628.87	901.442	873.721	750.125	590.789	613.909	764.114	649.107	677.176	839.102	651.976	1.2927	0.0288462	0.0951379	1
P40936	Indolethylamine N-methyltransferase OS=Mus musculus OX=10090 GN=Inmt PE=1 SV=1	3	2	3	325.887	307.648	291.452	354.199	339.357	460.579	569.411	586.376	542.47	351.335	367.451	306.331	308.008	381.127	565.795	340.699	1.83695	0.00039316	0.00702886	1
Q3UMF0	Cordon-bleu protein-like 1 OS=Mus musculus OX=10090 GN=Cobll1 PE=1 SV=2	10	10	11	1104.21	1139.24	1124.38	1172.28	1217.07	1304.73	1564.9	1452.82	1425.6	1143.04	1175.31	1129.71	1122.52	1230.14	1479.9	1149.19	1.31837	9.20858e-05	0.00287553	1
P48774	Glutathione S-transferase Mu 5 OS=Mus musculus OX=10090 GN=Gstm5 PE=1 SV=1	12	11	13	1844.64	1916.41	1992.76	2095.55	2012.55	2180.2	2393.62	2323.78	2273.66	2041.9	2122.96	1929.09	1916.99	2094.98	2329.83	2029.75	1.21536	0.00180641	0.0166102	1
Q03963	Interferon-induced, double-stranded RNA-activated protein kinase OS=Mus musculus OX=10090 GN=Eif2ak2 PE=1 SV=2	7	12	10	1516.33	1491.37	1529.02	1745.16	1688.56	1704.86	1922.15	1893.23	1826.18	1536.2	1646.69	1659.79	1512.16	1712.7	1880.09	1613.26	1.24332	6.12229e-05	0.00224038	1
Q3U0V1	Far upstream element-binding protein 2 OS=Mus musculus OX=10090 GN=Khsrp PE=1 SV=2	24	24	22	4929.08	4169.73	4712.95	4946.57	5559.44	5129.19	5455.87	5730.22	5575.65	5509.67	5381.8	5423.4	4592.57	5205.49	5586.12	5438.03	1.21634	0.00984887	0.0470256	1
Q99KB8	Hydroxyacylglutathione hydrolase, mitochondrial OS=Mus musculus OX=10090 GN=Hagh PE=1 SV=2	2	3	4	221.41	200.57	255.422	291.371	248.775	248.643	292.767	303.676	282.803	242.633	295.16	261.313	224.685	262.186	292.958	265.495	1.30386	0.0459332	0.129687	1
Q9QZ73	DCN1-like protein 1 OS=Mus musculus OX=10090 GN=Dcun1d1 PE=2 SV=1	2	1	3	100.86	96.3986	107.783	94.6395	87.7031	98.477	114.526	119.863	106.755	94.2894	100.35	91.3003	101.573	93.4991	113.586	95.2396	1.21484	0.0102599	0.0479612	1
P14206	40S ribosomal protein SA OS=Mus musculus OX=10090 GN=Rpsa PE=1 SV=4	12	13	15	3515.63	3431.49	3255.38	3696.27	3759.45	3792.76	4227.55	3959.38	4472.57	3725.85	4014.98	3644.58	3399.09	3749.28	4214.61	3791.86	1.23992	0.00278205	0.0216824	1
Q99KP6	Pre-mRNA-processing factor 19 OS=Mus musculus OX=10090 GN=Prpf19 PE=1 SV=1	5	7	7	1307.43	1210.72	1234.25	1372.84	1414.8	1339.28	1486.44	1618.65	1723.03	1359.08	1281.62	1229.23	1250.13	1375.3	1606.44	1288.88	1.28502	0.00136944	0.014192	1
Q99LG0	Ubiquitin carboxyl-terminal hydrolase 16 OS=Mus musculus OX=10090 GN=Usp16 PE=1 SV=2	2	1	1	154.491	142.885	147.273	142.48	151.771	151.945	172.399	176.768	164.989	137.449	135.396	142.612	148.139	148.665	171.316	138.453	1.23736	0.000456796	0.00759543	1
Q99L48	60S ribosomal export protein NMD3 OS=Mus musculus OX=10090 GN=Nmd3 PE=1 SV=1	1	3	3	152.955	161.105	143.836	167.153	141.152	167.048	202.201	209.302	194.653	139.013	149.763	155.785	152.468	157.96	201.963	148.023	1.36441	0.00152234	0.0150265	1
P29391	Ferritin light chain 1 OS=Mus musculus OX=10090 GN=Ftl1 PE=1 SV=2	4	6	7	560.151	586.134	643.794	697.584	709.491	736.415	861.141	851.376	782.295	627.617	599.491	583.989	595.685	714.313	830.849	603.431	1.39478	0.000104594	0.00308123	1
Q9Z204	Heterogeneous nuclear ribonucleoproteins C1/C2 OS=Mus musculus OX=10090 GN=Hnrnpc PE=1 SV=1	1	1	2	222.271	226.987	201.413	239.201	222.957	217.401	309.33	342.097	264.613	249.96	228.722	337.337	216.599	226.333	303.664	268.173	1.40196	0.039189	0.116621	1
Q64345	Interferon-induced protein with tetratricopeptide repeats 3 OS=Mus musculus OX=10090 GN=Ifit3 PE=1 SV=1	4	4	4	357.554	396.045	370.283	409.279	371.665	446.286	450.814	471.109	449.759	416.792	395.62	368.111	374.289	407.938	457.123	393	1.22131	0.0234033	0.0832355	1
P61161	Actin-related protein 2 OS=Mus musculus OX=10090 GN=Actr2 PE=1 SV=1	14	14	11	3719.97	3798.57	3589.1	3892.96	3589.82	3639.56	4021.4	4354.69	4497.46	3596.71	3487.94	3504.91	3701.53	3705.11	4286.48	3529.53	1.21446	0.00168546	0.0160135	1
Q9JJI8	60S ribosomal protein L38 OS=Mus musculus OX=10090 GN=Rpl38 PE=1 SV=3	3	4	4	1935.62	1868.62	1857.12	1914.99	2194.61	2108.9	2718.15	2311.58	2454.4	1825.36	2019.32	1973.7	1886.8	2069.47	2489.1	1937.66	1.31922	0.00215821	0.0183762	1
O55142	60S ribosomal protein L35a OS=Mus musculus OX=10090 GN=Rpl35a PE=1 SV=2	6	4	5	2427.35	2185.18	1892.33	2272.86	2411.61	2601.42	2645.01	2657.3	2880.85	2375.17	2466.31	2345.79	2157.11	2424.92	2725.6	2395.21	1.26354	0.0348911	0.107202	1
Q8CBE3	WD repeat-containing protein 37 OS=Mus musculus OX=10090 GN=Wdr37 PE=1 SV=1	4	3	4	267.06	248.21	264.695	261.759	218.918	266.595	308.85	400.77	338.267	269.908	239.679	238.021	259.851	248.129	347.244	248.783	1.39945	0.00673534	0.0373796	1
Q8VEE1	LIM and cysteine-rich domains protein 1 OS=Mus musculus OX=10090 GN=Lmcd1 PE=1 SV=1	2	3	3	349.978	389.373	380.896	365.036	353.012	416.797	480.084	456.122	398.259	360.239	356.83	359.385	373.025	377.297	443.46	358.815	1.2359	0.0278396	0.0934102	1
Q9Z0E6	Guanylate-binding protein 2 OS=Mus musculus OX=10090 GN=Gbp2 PE=1 SV=1	3	4	3	275.13	286.723	263.577	308.586	293.049	349.948	344.158	352.735	335.575	287.968	283.335	266.743	274.981	316.306	344.085	279.198	1.2513	0.00323426	0.0235603	1
P47915	60S ribosomal protein L29 OS=Mus musculus OX=10090 GN=Rpl29 PE=1 SV=2	2	2	2	222.562	209.917	187.49	209.769	229.46	210.908	313.261	300.262	346.416	266.601	272.555	267.38	206.138	216.528	319.4	268.832	1.54944	8.91388e-05	0.0028365	1
Q9D7E4	UPF0449 protein C19orf25 homolog OS=Mus musculus OX=10090 PE=1 SV=1	1	2	4	164.472	196.671	209.36	197.308	190.851	194.112	270.488	237.499	218.789	202.881	210.129	212.889	189.194	194.072	241.33	208.59	1.27557	0.0288623	0.0951379	1
Q03173	Protein enabled homolog OS=Mus musculus OX=10090 GN=Enah PE=1 SV=2	5	2	4	234.388	244.515	267.27	282.719	280.048	277.776	356.62	318.718	306.146	244.098	274.544	266.633	248.35	280.174	326.473	261.435	1.31457	0.00274234	0.0215161	1
Q64282	Interferon-induced protein with tetratricopeptide repeats 1 OS=Mus musculus OX=10090 GN=Ifit1 PE=1 SV=2	10	6	9	1030.7	1164.8	1042.68	1186.51	1174.36	1313.73	1418.52	1298.7	1431.66	1170.93	1168.8	1018.58	1077.73	1223.28	1381.64	1117.09	1.28198	0.00765124	0.0404954	1
Q91YT7	YTH domain-containing family protein 2 OS=Mus musculus OX=10090 GN=Ythdf2 PE=1 SV=1	3	2	1	655.063	609.769	542.676	624.184	681.724	663.885	693.975	722.384	815.361	633.942	593.287	585.241	600.707	656.152	742.142	603.786	1.23545	0.020227	0.0754927	1
Q6PDN3	Myosin light chain kinase, smooth muscle OS=Mus musculus OX=10090 GN=Mylk PE=1 SV=3	4	3	5	533.932	520.559	537.441	597.273	514.581	612.169	660.462	703.825	611.632	534.495	587.196	564.92	530.594	573.015	657.558	561.786	1.23929	0.0183391	0.0713457	1
Q9D0D4	Probable dimethyladenosine transferase OS=Mus musculus OX=10090 GN=Dimt1 PE=2 SV=1	2	1	1	423.278	390.854	395.818	404.365	406.583	425.524	451.085	485.485	454.184	380.752	376.558	383.954	403.068	412.049	463.328	380.409	1.21797	0.000550253	0.00845045	1
Q9ERG0	LIM domain and actin-binding protein 1 OS=Mus musculus OX=10090 GN=Lima1 PE=1 SV=3	6	14	11	1290.57	1481.85	1432.7	1452.07	1868.54	1820.6	2984.14	2065.26	2280.01	1339.78	1650.92	1533.25	1399.31	1703.08	2413.11	1502.42	1.7245	0.00474185	0.0301368	1
Q5U3K5	Rab-like protein 6 OS=Mus musculus OX=10090 GN=Rabl6 PE=1 SV=2	4	2	1	335.17	326.069	365.712	357.842	327.741	329.426	406.069	441.793	426.639	377.063	380.541	354.367	341.904	338.06	424.58	370.473	1.25593	0.00143458	0.0146319	1
J3QNT7	Epsin-2 OS=Mus musculus OX=10090 GN=Epn2 PE=1 SV=1	3	1	3	230.173	200.838	202.469	219.831	235.371	222.186	241.072	255.58	277.835	251.511	250.798	240.097	210.743	225.694	257.723	247.413	1.22293	0.00993507	0.0473418	1
Q3UIR3	E3 ubiquitin-protein ligase DTX3L OS=Mus musculus OX=10090 GN=Dtx3l PE=1 SV=1	2	2	3	52.4355	49.1171	52.0219	52.4401	58.3396	66.4594	65.3282	73.2441	56.6205	52.4786	41.9815	47.5805	51.1699	58.8023	64.7067	47.1509	1.37233	0.0255066	0.0882371	2
Q9EQK5	Major vault protein OS=Mus musculus OX=10090 GN=Mvp PE=1 SV=4	31	25	32	4175.69	3910.05	3982.12	4605.69	4967.24	4574.99	4256.57	4233.53	4605.29	3033.04	2960.15	2908.58	4021.07	4712.67	4361.87	2966.82	1.58846	2.22469e-06	0.00032564	2
Q9D6Z1	Nucleolar protein 56 OS=Mus musculus OX=10090 GN=Nop56 PE=1 SV=2	6	5	2	445.766	432.52	425.224	447.179	456.331	469.702	536.361	522.124	536.82	382.037	400.367	379.597	434.42	457.644	531.724	387.224	1.37317	1.57698e-06	0.000263807	2
P97449	Aminopeptidase N OS=Mus musculus OX=10090 GN=Anpep PE=1 SV=4	6	3	4	318.962	365.893	379.675	405.433	398.171	389.8	520.151	451.687	446.314	298.089	326.883	326.846	353.863	397.75	471.559	316.977	1.48768	0.000605937	0.00889721	2
Q8BP67	60S ribosomal protein L24 OS=Mus musculus OX=10090 GN=Rpl24 PE=1 SV=2	7	7	9	3169.57	2917.86	2987.53	3212.91	3851.96	3345.05	4029.81	3727.66	3976.83	3150.01	3064.82	3252.88	3023.15	3459.35	3909.18	3154.97	1.29308	0.00284906	0.021913	2
Q8BR90	UPF0600 protein C5orf51 homolog OS=Mus musculus OX=10090 PE=1 SV=1	4	4	5	307.062	278.495	292.018	342.267	338.02	345.436	349.441	374.026	346.874	284.113	292.343	298.556	292.293	341.894	356.573	291.611	1.22277	0.00015179	0.00388515	2
Q5SYD0	Unconventional myosin-Id OS=Mus musculus OX=10090 GN=Myo1d PE=1 SV=1	8	12	13	1247.92	1159.11	1243.8	1363.03	1556.31	1300.34	1496.91	1441.21	1447.69	1302.83	1254.06	1418.86	1216.25	1402.45	1461.72	1323.47	1.20183	0.0286729	0.0948369	2
Q61838	Pregnancy zone protein OS=Mus musculus OX=10090 GN=Pzp PE=1 SV=3	3	2	2	919.619	907.956	947.475	1035.9	999.494	1027.55	979.305	1030.49	1058.82	755.005	751.889	655.987	924.869	1020.86	1022.34	719.448	1.42101	4.71621e-05	0.00203939	2
Q9CQ89	Protein CutA OS=Mus musculus OX=10090 GN=Cuta PE=1 SV=3	2	2	3	490.864	517.542	502.262	569.564	529.3	571.057	580.908	588.867	589.614	477.956	483.581	456.358	503.438	556.298	586.45	472.484	1.2412	8.55677e-05	0.00277399	2
P07356	Annexin A2 OS=Mus musculus OX=10090 GN=Anxa2 PE=1 SV=2	20	15	20	5435.21	5495.11	4908.7	5500.74	6223.76	5234.66	4723.46	4395.51	5237.97	4344.96	3889.98	4623.03	5272.94	5637.94	4773.21	4275.17	1.31876	0.0159659	0.0646967	2
A6H630	Protein-glutamate O-methyltransferase OS=Mus musculus OX=10090 GN=Armt1 PE=1 SV=1	3	4	1	418.832	447.826	447.338	441.2	437.327	450.148	443.116	477.2	461.365	407.009	347.805	351.307	437.786	442.859	460.349	367.741	1.25183	0.00322109	0.0235009	2
Q3TLH4	Protein PRRC2C OS=Mus musculus OX=10090 GN=Prrc2c PE=1 SV=3	10	14	17	2581.52	2186.9	2323.93	2555.78	2911.57	2597.81	2857.97	3046.61	3010.57	2484.13	2334.32	2547.09	2358.54	2683.82	2970.58	2453.54	1.2595	0.00776403	0.0407211	2
P97493	Thioredoxin, mitochondrial OS=Mus musculus OX=10090 GN=Txn2 PE=1 SV=1	1	2	1	490.653	519.239	495.243	503.045	497.28	484.639	454.825	471.981	461.495	411.794	371.818	418.942	501.557	494.928	462.713	400.302	1.25294	0.000315938	0.00637868	2
P61255	60S ribosomal protein L26 OS=Mus musculus OX=10090 GN=Rpl26 PE=1 SV=1	3	2	4	915.511	813.784	826.739	883.975	1045.92	951.509	1024.89	1015.99	1058.01	964.356	913.036	952.476	850.838	958.188	1032.81	943.032	1.21387	0.0181214	0.0707337	2
Q8K5B2	Multiple coagulation factor deficiency protein 2 homolog OS=Mus musculus OX=10090 GN=Mcfd2 PE=1 SV=1	4	5	5	953.644	1042.75	938.38	1290.27	1256.76	1331.9	1326.73	1199.01	1295.41	825.429	897.556	830.385	977.197	1292.61	1272.54	850.498	1.51983	1.04714e-05	0.000860493	2
Q8BH57	WD repeat-containing protein 48 OS=Mus musculus OX=10090 GN=Wdr48 PE=1 SV=1	1	4	2	430.911	452.181	406.96	500.534	482.469	515.873	459.221	441.584	506.561	420.906	435.337	382.178	429.619	499.438	468.334	412.185	1.21169	0.0147038	0.0612317	2
Q7TPM9	Myotubularin-related protein 10 OS=Mus musculus OX=10090 GN=Mtmr10 PE=1 SV=2	2	4	2	126.123	112.993	105.103	127.654	135.855	136.266	114.492	130.345	132.521	116.112	105.187	110.491	114.416	133.199	125.521	110.507	1.20535	0.0356465	0.108845	2
Q3UGS4	Mapk-regulated corepressor-interacting protein 1 OS=Mus musculus OX=10090 GN=Mcrip1 PE=1 SV=1	3	3	2	426.753	395.21	427.081	476.298	588.664	469.096	445.411	394.398	486.787	411.547	381.737	377.045	416.075	508.553	440.566	389.816	1.3046	0.0322976	0.101805	2
Q9CZT5	Vasorin OS=Mus musculus OX=10090 GN=Vasn PE=2 SV=2	5	6	6	510.446	503.198	544.406	693.253	705.944	696.988	623.094	574.745	597.741	652.981	695.886	640.639	519.044	698.708	598.201	662.751	1.34614	4.25104e-05	0.00187848	2
Q9CRB0	Sorting nexin-24 OS=Mus musculus OX=10090 GN=Snx24 PE=1 SV=1	2	1	2	66.0248	70.2839	79.9154	82.3294	85.8981	80.2034	88.902	80.54	74.4258	67.8784	68.4126	70.5901	71.8452	82.7771	81.0741	68.9505	1.20053	0.0296112	0.0961852	2
P01942	Hemoglobin subunit alpha OS=Mus musculus OX=10090 GN=Hba PE=1 SV=2	1	2	2	705.336	570.434	567.697	635.613	518.562	630.331	595.415	608.796	739.25	315.694	554.266	314.781	611.279	592.271	644.705	380.479	1.69446	0.0344251	0.106154	2
P41105	60S ribosomal protein L28 OS=Mus musculus OX=10090 GN=Rpl28 PE=1 SV=2	8	6	6	2576.38	2297.36	2481.23	2557.28	2892.2	2622.2	3073.8	3106.52	2845.18	2661.78	2573.15	2920.62	2448.89	2686.73	3006.21	2714.59	1.22758	0.0198004	0.0747479	2
F8VQJ3	Laminin subunit gamma-1 OS=Mus musculus OX=10090 GN=Lamc1 PE=1 SV=1	10	13	12	2598.77	2618.64	2751.97	3183.18	3338.28	3125.91	2761.5	2661.35	2716.03	2719.73	2644.92	2669.26	2655.6	3214.55	2712.65	2677.79	1.21048	4.7458e-05	0.00203939	2
Q8VEH3	ADP-ribosylation factor-like protein 8A OS=Mus musculus OX=10090 GN=Arl8a PE=1 SV=1	1	3	6	541.818	574.336	598.186	728.456	667.678	713.762	723.853	732.689	667.492	576.007	595.431	590.695	570.977	702.815	707.412	587.319	1.23895	0.000370272	0.00682817	2
Q80WJ7	Protein LYRIC OS=Mus musculus OX=10090 GN=Mtdh PE=1 SV=1	9	9	11	1365.17	1244.11	1332.41	1482.26	1578.77	1495.04	1652.61	1827.72	1751.24	1602.42	1451.86	1523.77	1312.89	1518.09	1742.38	1524.78	1.32713	0.000544423	0.00841609	2
Q5SRX1	TOM1-like protein 2 OS=Mus musculus OX=10090 GN=Tom1l2 PE=1 SV=1	5	8	7	811.223	928.137	960.027	1146.43	1007.02	985.712	1230.38	1149.98	1134.3	868.935	971.824	976.926	897.454	1044.03	1170.81	937.876	1.30459	0.00826947	0.0424325	2
P17665	Cytochrome c oxidase subunit 7C, mitochondrial OS=Mus musculus OX=10090 GN=Cox7c PE=1 SV=1	2	1	1	466.772	396.607	369.911	484.41	532.359	420.981	558.458	472.272	635.144	295.336	403.739	378.94	409.124	477.046	551.254	356.174	1.54771	0.0237355	0.0840342	2
Q8BKX1	Brain-specific angiogenesis inhibitor 1-associated protein 2 OS=Mus musculus OX=10090 GN=Baiap2 PE=1 SV=2	7	6	6	1269.72	1322.08	1257.52	1494.65	1544.67	1523.2	1605.97	1462.52	1669.53	1356.79	1397.86	1276.88	1282.8	1520.7	1576.93	1342.89	1.22928	0.00119176	0.0132593	2
P97352	Protein S100-A13 OS=Mus musculus OX=10090 GN=S100a13 PE=1 SV=1	3	3	4	951.88	970.658	941.598	1140.74	1093.25	1132.77	1066.34	1122.23	1032.69	901.263	874.082	953.167	954.636	1122.06	1073.12	908.917	1.2345	0.000174078	0.00431418	2
P24549	Retinal dehydrogenase 1 OS=Mus musculus OX=10090 GN=Aldh1a1 PE=1 SV=5	1	5	4	336.924	293.782	303.56	356.454	315.798	352.759	384.278	460.624	434.504	286.011	293.463	272.844	310.886	341.164	425.267	283.977	1.49754	0.000595316	0.00878124	2
Q9CQ62	2,4-dienoyl-CoA reductase, mitochondrial OS=Mus musculus OX=10090 GN=Decr1 PE=1 SV=1	4	4	2	458.221	418.685	421.654	494.801	502.979	489.299	552.076	548.568	580.093	388.284	423.149	402.334	432.487	495.661	560.07	404.337	1.38516	2.20374e-05	0.00142596	2
O08709	Peroxiredoxin-6 OS=Mus musculus OX=10090 GN=Prdx6 PE=1 SV=3	2	3	2	259.611	261.928	285.946	318.43	306.021	299.968	300.009	310.598	314.084	254.254	253.757	232.306	268.904	308.045	308.172	246.556	1.24991	0.000408816	0.00707694	2
Q9QWR8	Alpha-N-acetylgalactosaminidase OS=Mus musculus OX=10090 GN=Naga PE=1 SV=2	2	7	8	782.902	678.1	717.017	860.918	993.342	932.992	854.627	1019.8	1042.08	822.939	630.141	629.294	724.731	927.498	968.423	688.472	1.40663	0.00962787	0.0463008	2
P01029	Complement C4-B OS=Mus musculus OX=10090 GN=C4b PE=1 SV=3	1	4	2	745.489	699.891	670.204	840.756	825.242	884.331	892.987	835.707	881.485	439.065	557.458	482.278	704.519	849.745	869.704	490.546	1.77293	2.95033e-05	0.00157858	2
Q4KML4	Costars family protein ABRACL OS=Mus musculus OX=10090 GN=Abracl PE=1 SV=1	3	3	2	667.727	615.193	607.21	664.104	718.03	766.603	662.385	682.64	732.301	633.973	612.327	522.075	629.481	715.017	691.827	587.393	1.21727	0.0384261	0.11517	2
Q6DFW4	Nucleolar protein 58 OS=Mus musculus OX=10090 GN=Nop58 PE=1 SV=1	3	7	6	857.148	876.671	869.62	952.66	964.471	958.407	1061.02	1083.59	1091.12	865.416	811.518	817.1	867.775	958.5	1078.5	830.997	1.29784	1.1475e-06	0.000225547	2
Q9D8U8	Sorting nexin-5 OS=Mus musculus OX=10090 GN=Snx5 PE=1 SV=1	11	14	9	2729.46	2967.13	2833.23	3361.18	3162.89	3292.07	3243.48	3142.79	3180.43	2675.4	2736.72	2703.8	2841.62	3271.01	3188.63	2705.19	1.20916	8.19848e-05	0.00276256	2
Q60865	Caprin-1 OS=Mus musculus OX=10090 GN=Caprin1 PE=1 SV=2	7	8	8	2454.26	2043.79	2090.72	2365.76	2681.54	2375.49	2451.98	2558.19	2755.95	2136.96	2125.45	2186.8	2188.86	2470.04	2585.67	2149.57	1.20288	0.0272075	0.0920143	2
P42669	Transcriptional activator protein Pur-alpha OS=Mus musculus OX=10090 GN=Pura PE=1 SV=1	7	8	8	648.687	628.383	648.809	701.805	726.768	730.486	777.243	785.919	789.732	731.284	717.949	689.993	641.887	719.573	784.28	712.867	1.22183	2.20105e-05	0.00142596	2
O35143	ATPase inhibitor, mitochondrial OS=Mus musculus OX=10090 GN=ATP5IF1 PE=1 SV=2	4	1	2	411.286	368.78	386.65	478.676	542.871	509.746	440.773	440.859	500.407	405.614	383.84	339.547	388.517	509.758	459.846	375.308	1.35824	0.0024247	0.0197862	2
Q8C0J6	Ankyrin repeat domain-containing protein SOWAHC OS=Mus musculus OX=10090 GN=Sowahc PE=1 SV=2	3	3	1	85.7406	80.957	86.8429	103.37	101.804	100.947	100.431	105.304	111.042	82.725	84.2009	73.4341	84.4744	102.036	105.503	79.9743	1.31922	0.00025524	0.00561287	2
Q5EBG8	Uncharacterized protein C1orf50 homolog OS=Mus musculus OX=10090 PE=1 SV=1	1	2	1	71.5949	70.0333	66.256	83.3749	76.1394	91.7482	75.3004	72.7458	78.779	63.907	75.2588	57.394	69.2581	83.5117	75.5681	65.1115	1.2826	0.0373046	0.112732	2
P53612	Geranylgeranyl transferase type-2 subunit beta OS=Mus musculus OX=10090 GN=Rabggtb PE=1 SV=2	1	1	1	265.539	270.725	265.02	263.562	298.55	288.48	308.747	304.796	299.112	258.878	222.655	244.114	267.082	283.143	304.193	241.42	1.26001	0.00317743	0.0234011	2
F2Z3U3	Ras association (RalGDS/AF-6) and pleckstrin homology domains 1 OS=Mus musculus OX=10090 GN=Raph1 PE=1 SV=2	4	4	8	431.797	424.427	443.908	455.74	465.826	452.652	495.513	510.805	459.587	400.826	382.818	427.73	433.303	458.038	488.157	403.372	1.21019	0.00275803	0.021531	2
Q8CHS8	Vacuolar protein sorting-associated protein 37A OS=Mus musculus OX=10090 GN=Vps37a PE=1 SV=1	1	2	3	205.967	227.514	227.262	252.724	228.79	218.143	219.207	222.285	211.49	185.261	184.571	206.264	220.011	232.778	217.613	191.774	1.21381	0.0198068	0.0747479	2
Q8CGU1	Calcium-binding and coiled-coil domain-containing protein 1 OS=Mus musculus OX=10090 GN=Calcoco1 PE=1 SV=2	2	4	4	251.19	289.309	277.049	361.178	298.55	319.509	309.448	299.034	284.659	238.385	273.309	278.986	272.045	325.392	297.54	262.929	1.23757	0.0364128	0.110758	2
Q8CD10	Calcium uptake protein 2, mitochondrial OS=Mus musculus OX=10090 GN=Micu2 PE=1 SV=2	3	2	3	222.143	182.628	199.519	223.391	263.33	277.913	250.385	251.213	227.264	200.663	199.412	191.887	200.784	253.8	242.695	197.283	1.28648	0.0101143	0.0477572	2
P51410	60S ribosomal protein L9 OS=Mus musculus OX=10090 GN=Rpl9 PE=2 SV=2	11	10	12	1818.15	1542.74	1594.2	1750.13	1927.35	1872.44	1905.99	2020.87	2043.46	1794.88	1778.2	1759.07	1647.49	1848.47	1989.19	1777.33	1.20741	0.0158125	0.0643802	2
Q8K2I4	Beta-mannosidase OS=Mus musculus OX=10090 GN=Manba PE=1 SV=1	6	12	11	1665.25	1659.06	1635.62	1952.91	1794.9	1965.98	2029.34	2049.18	2047.23	1583.61	1727.96	1582.29	1653.26	1902.98	2041.9	1629.88	1.25279	0.000145535	0.00384703	2
Q9CQS8	Protein transport protein Sec61 subunit beta OS=Mus musculus OX=10090 GN=Sec61b PE=1 SV=3	3	2	3	739.594	655.608	649.156	764.504	962.479	793.609	976.679	925.619	1107.52	821.959	759.031	752.447	680.24	835.845	1000.41	777.192	1.47068	0.00457053	0.0297338	2
P19182	Interferon-related developmental regulator 1 OS=Mus musculus OX=10090 GN=Ifrd1 PE=1 SV=2	1	1	1	114.619	119.311	124.603	173.984	176.801	185.29	201.412	186.994	174.536	117.97	124.88	123.557	119.442	178.628	187.327	122.098	1.56835	2.8401e-06	0.000380087	2
Q61391	Neprilysin OS=Mus musculus OX=10090 GN=Mme PE=1 SV=3	12	10	13	1793.24	1871.01	2010.6	2273.76	2056.7	2105.85	2294.79	2507.27	2463.76	1695.66	1622.48	1477.24	1889.5	2143.46	2420.18	1595.84	1.51656	0.000123528	0.0034237	2
Q9ET22	Dipeptidyl peptidase 2 OS=Mus musculus OX=10090 GN=Dpp7 PE=1 SV=2	10	8	8	1779.32	1986.46	1987.65	2342.4	2057.69	2275.83	2433.23	2427.45	2302.62	1989.88	2073.22	1978.72	1915.25	2221.91	2387	2013.51	1.24631	0.00298739	0.022679	2
Q61656	Probable ATP-dependent RNA helicase DDX5 OS=Mus musculus OX=10090 GN=Ddx5 PE=1 SV=2	18	16	22	3649.24	2813.71	3058.77	3802.34	4328.15	3992.09	3924.45	4454.82	4538.9	3862.99	3642.34	3649.26	3155.07	4035.07	4297.21	3716.8	1.362	0.0110552	0.0501771	2
Q80VP1	Epsin-1 OS=Mus musculus OX=10090 GN=Epn1 PE=1 SV=3	4	5	3	316.295	301.464	342.004	325.155	329.801	333.633	362.479	362.119	357.465	307.131	317.675	277.958	319.487	329.511	360.681	300.443	1.2005	0.00982565	0.0469626	2
Q0KL02	Triple functional domain protein OS=Mus musculus OX=10090 GN=Trio PE=1 SV=3	5	3	5	206.874	207.737	211.05	200.03	208.89	211.195	224.292	231.093	215.735	191.338	174.815	184.555	208.546	206.648	223.618	183.443	1.219	0.000504745	0.00795744	2
A2APV2	Formin-like protein 2 OS=Mus musculus OX=10090 GN=Fmnl2 PE=1 SV=2	1	4	6	184.72	208.226	202.108	288.055	230.286	232.232	243.476	238.65	250.302	193.359	232.448	224.968	198.097	248.822	244.096	216.24	1.25606	0.0381128	0.114583	2
Q8C142	Low density lipoprotein receptor adapter protein 1 OS=Mus musculus OX=10090 GN=Ldlrap1 PE=1 SV=3	1	4	3	132.295	149.187	134.151	158.14	151.79	176.395	177.459	153.574	169.846	130.037	143.381	117.54	138.343	161.78	166.657	129.892	1.28305	0.0137485	0.0583843	2
Q8BMK4	Cytoskeleton-associated protein 4 OS=Mus musculus OX=10090 GN=Ckap4 PE=1 SV=2	34	32	35	8451.46	7515.48	7580.28	8504.36	9671.74	9167.25	10092.5	9276.44	10002.1	8102.24	8686.87	8400.87	7837.75	9101.83	9783.42	8393.26	1.24824	0.00526144	0.0321619	2
Q9ERI6	Retinol dehydrogenase 14 OS=Mus musculus OX=10090 GN=Rdh14 PE=1 SV=1	1	1	2	104.39	113.761	111.45	116.285	124.313	113.06	109.127	89.4663	99.6871	94.382	96.6434	99.9867	109.794	117.792	99.1006	96.9768	1.21464	0.015127	0.0621175	2
P84104	Serine/arginine-rich splicing factor 3 OS=Mus musculus OX=10090 GN=Srsf3 PE=1 SV=1	2	4	2	1444.76	1209.7	1173.1	1398.84	1521.75	1484.84	1563.94	1613.6	1675.46	1282	1344.49	1356.14	1270.39	1467.56	1617.02	1327.14	1.27286	0.00747786	0.0398933	2
Q76I26	Methyltransferase hypoxia-inducible domain-containing 1 OS=Mus musculus OX=10090 GN=Methig1 PE=2 SV=1	2	2	2	274.788	280.007	260.938	329.262	298.171	348.418	303.557	365.265	325.885	310.654	274.819	283.021	271.791	324.615	330.601	289.099	1.21638	0.0279888	0.0935757	2
Q8VHG0	Dimethylaniline monooxygenase [N-oxide-forming] 4 OS=Mus musculus OX=10090 GN=Fmo4 PE=1 SV=3	2	2	2	119.709	115.06	129.578	132.002	116.371	130.215	158.223	164.153	139.507	97.941	112.291	108.575	121.3	125.997	153.593	106.091	1.44774	0.00169581	0.0160468	2
Q9ERE7	LRP chaperone MESD OS=Mus musculus OX=10090 GN=Mesd PE=1 SV=1	10	11	10	2731.08	2832.03	2758.98	3149.65	2804.98	3139.22	3260.39	3348.93	3222.87	2586.41	2741.6	2606.46	2773.71	3026.95	3276.97	2643.94	1.23943	0.000672019	0.00934047	2
Q9R078	5'-AMP-activated protein kinase subunit beta-1 OS=Mus musculus OX=10090 GN=Prkab1 PE=1 SV=2	2	5	6	264.307	245.805	246.566	291.649	271.622	269.257	273.678	276.632	286.463	208.856	244.432	236.204	252.083	277.331	278.871	229.314	1.21611	0.00545193	0.0326558	2
Q60648	Ganglioside GM2 activator OS=Mus musculus OX=10090 GN=Gm2a PE=1 SV=2	5	5	6	843.407	891.604	896.593	1067.18	969.436	1083.73	1084.84	1174.61	1068.46	915.518	875.287	862.158	876.869	1038.87	1108.34	884.032	1.26397	0.000468207	0.0076414	2
Q6ZQK0	Condensin-2 complex subunit D3 OS=Mus musculus OX=10090 GN=Ncapd3 PE=1 SV=3	6	3	3	132.07	100.778	129.462	164.814	172.739	153.567	149.251	161.52	161.502	145.986	157.084	147.589	119.887	163.516	157.316	150.141	1.36392	0.00936086	0.0453895	2
P83882	60S ribosomal protein L36a OS=Mus musculus OX=10090 GN=Rpl36a PE=3 SV=2	2	1	2	376.822	309.519	309.114	356.883	416.549	389.519	408.315	402.13	414.848	340.26	354.081	368.799	330.355	386.878	408.398	354.189	1.23624	0.0295366	0.0960411	2
Q6NZB0	DnaJ homolog subfamily C member 8 OS=Mus musculus OX=10090 GN=Dnajc8 PE=1 SV=2	6	4	2	872.888	771.575	816.599	901.754	998.708	966.169	952.146	1001.18	1015.29	899.605	854.933	828.331	819.311	954.685	989.165	860.457	1.20731	0.00459328	0.0297655	2
P02798	Metallothionein-2 OS=Mus musculus OX=10090 GN=Mt2 PE=1 SV=2	3	2	4	76.6128	106.871	70.1063	237.998	220.149	255.86	218.79	162.654	227.428	90.9837	134.711	70.9894	83.1072	237.555	200.776	95.467	2.85842	0.000755726	0.00986023	2
Q8BVU5	ADP-ribose pyrophosphatase, mitochondrial OS=Mus musculus OX=10090 GN=Nudt9 PE=1 SV=1	3	3	2	679.654	709.644	729.301	768.354	768.059	741.995	843.629	802.041	772.442	627.015	638.907	674.913	705.903	759.368	805.511	646.628	1.24571	0.000363376	0.00678108	2
Q3TIV5	Zinc finger CCCH domain-containing protein 15 OS=Mus musculus OX=10090 GN=Zc3h15 PE=1 SV=2	7	8	4	1124.59	997.322	1138.74	1171.2	1323.4	1193.5	1350.92	1309.01	1288.68	1141.52	1158.5	1167.32	1084.97	1227.58	1315.95	1155.73	1.21289	0.00900548	0.0445424	2
P48024	Eukaryotic translation initiation factor 1 OS=Mus musculus OX=10090 GN=Eif1 PE=1 SV=2	5	4	7	1166.58	1111.57	1046.71	1204.33	1359.75	1381.82	1323.4	1309.89	1382.91	1155.32	1068.42	1038.18	1107.2	1312.86	1338.36	1086.19	1.23216	0.00275031	0.021531	2
O55239	Nicotinamide N-methyltransferase OS=Mus musculus OX=10090 GN=Nnmt PE=1 SV=1	1	2	3	67.9325	94.9222	96.0925	123.626	106.726	109.731	120.277	123.597	110.76	92.5162	79.1069	87.7679	85.2534	113.128	118.084	86.2825	1.3851	0.0146615	0.0611527	2
Q3U4S0	Pantothenate kinase 2 OS=Mus musculus OX=10090 GN=Pank2 PE=1 SV=1	2	1	1	98.0309	109.632	89.4968	134.007	113.807	113.282	126.707	128.68	126.663	81.5104	88.1373	110.814	98.712	119.992	127.347	92.6807	1.37404	0.0177061	0.0695487	2
Q9CQJ6	Density-regulated protein OS=Mus musculus OX=10090 GN=Denr PE=1 SV=1	3	2	5	505.301	520.609	551.531	645.761	674.506	578.207	726.047	686.46	627.304	474.711	470.244	594.778	525.465	631.51	678.713	510.156	1.3304	0.0107614	0.0494227	2
P21981	Protein-glutamine gamma-glutamyltransferase 2 OS=Mus musculus OX=10090 GN=Tgm2 PE=1 SV=4	3	5	4	240.565	251.903	244.557	311.42	287.847	300.091	297.557	305.445	311.235	234.113	238.46	227.773	245.63	299.631	304.694	233.407	1.30542	4.20317e-06	0.000480187	2
Q3TQC7	Ectonucleoside triphosphate diphosphohydrolase 5 OS=Mus musculus OX=10090 GN=Entpd5 PE=1 SV=1	2	2	4	135.279	137.42	135.385	181.388	149.608	154.002	135.038	155.25	156.369	115.549	124.975	121.498	136.025	161.076	148.552	120.611	1.3355	0.00505517	0.0313622	2
Q99K95	Protein RTF2 homolog OS=Mus musculus OX=10090 GN=Rtfdc1 PE=1 SV=1	2	1	1	255.898	240.896	218.786	300.505	278.595	290.454	238.232	246.66	310.988	218.182	246.666	192.588	238.034	289.713	263.399	218.032	1.32877	0.0479489	0.133448	2
P29341	Polyadenylate-binding protein 1 OS=Mus musculus OX=10090 GN=Pabpc1 PE=1 SV=2	24	26	26	5736.03	5211.19	5715.81	5772.76	6489.41	5877.03	6686.13	6668.82	6706.42	6196.71	6022.21	6092.36	5548.92	6038.31	6687.1	6103.34	1.20512	0.00472124	0.0301172	2
P23949	mRNA decay activator protein ZFP36L2 OS=Mus musculus OX=10090 GN=Zfp36l2 PE=1 SV=2	1	2	2	311.65	348.573	351.848	520.464	412.425	509.709	355.922	362.824	321.141	222.689	286.903	228.027	336.852	478.284	346.138	244.234	1.9583	0.000440823	0.0074274	2
Q9JLV6	Bifunctional polynucleotide phosphatase/kinase OS=Mus musculus OX=10090 GN=Pnkp PE=1 SV=2	3	3	2	62.7206	59.4717	72.6371	73.3995	94.2693	74.1833	82.3328	77.2427	80.1292	70.7277	58.1969	62.2311	64.7083	80.0675	79.8743	63.5086	1.26074	0.0352623	0.108236	2
Q31125	Zinc transporter SLC39A7 OS=Mus musculus OX=10090 GN=Slc39a7 PE=1 SV=2	1	4	3	808.381	875.747	781.199	902.365	873.326	933.383	916.929	838.354	920.521	694.388	734.635	686.959	820.828	902.692	891.112	705.02	1.28038	0.000653014	0.00923344	2
Q61140	Breast cancer anti-estrogen resistance protein 1 OS=Mus musculus OX=10090 GN=Bcar1 PE=1 SV=2	11	11	9	1581.44	1396.33	1421.55	1738.45	1805.15	1941.98	1717.09	1918.88	1800.63	1538.42	1455.04	1411.24	1464.2	1826.59	1810.32	1467.29	1.2475	0.00130147	0.0139498	2
Q8K183	Pyridoxal kinase OS=Mus musculus OX=10090 GN=Pdxk PE=1 SV=1	8	5	7	729.964	738.095	750.76	836.88	786.691	791.199	895.893	909.604	913.415	721.392	749.739	728.755	739.557	804.608	906.273	733.198	1.23606	6.95144e-06	0.000692777	2
Q9CX60	Protein LBH OS=Mus musculus OX=10090 GN=Lbh PE=1 SV=1	1	1	2	92.5581	106.588	101.379	121.679	112.771	114.231	117.022	109.135	113.177	92.474	95.2396	94.9457	100.005	116.162	113.065	94.2116	1.233	0.00136951	0.014192	2
Q9R0Q6	Actin-related protein 2/3 complex subunit 1A OS=Mus musculus OX=10090 GN=Arpc1a PE=1 SV=1	2	1	2	267.91	256.45	235.096	282.116	287.941	319.043	293.035	298.263	292.614	235.696	236.102	232.003	252.782	295.933	294.626	234.593	1.26148	0.00067106	0.00934047	2
Q61635	GTP-binding protein OS=Mus musculus OX=10090 GN=Ifi47 PE=1 SV=1	5	5	3	449.967	452.574	471.125	517.482	449.912	516.08	533.194	556.452	511.815	411.677	453.382	413.299	457.792	493.454	533.509	425.692	1.25328	0.00494998	0.0309969	2
O08663	Methionine aminopeptidase 2 OS=Mus musculus OX=10090 GN=Metap2 PE=1 SV=1	4	4	6	1131.82	1018.53	1145.18	1270.14	1356.11	1229.04	1330.39	1329.35	1335.32	1058.43	1086.79	1081.24	1097	1284.02	1331.69	1075.41	1.2383	0.000409447	0.00707694	2
Q6DFV1	Condensin-2 complex subunit G2 OS=Mus musculus OX=10090 GN=Ncapg2 PE=1 SV=2	5	5	4	469.674	368.336	384.696	484.084	591.73	527.847	575.726	565.754	635.929	459.087	462.75	440.099	405.246	532.743	591.676	453.869	1.46004	0.00359725	0.0252996	2
J3QN89	Angio-associated migratory protein OS=Mus musculus OX=10090 GN=Aamp PE=1 SV=1	3	3	1	169.733	170.567	193.634	215.975	209.821	199.954	208.156	222.746	189.371	161.055	151.785	171.961	177.643	208.478	206.302	161.39	1.29176	0.00392617	0.0268074	2
P97864	Caspase-7 OS=Mus musculus OX=10090 GN=Casp7 PE=1 SV=2	6	4	5	371.032	396.844	416.228	539.912	470.516	446.334	487.272	499.797	442.944	372.819	403.877	465.528	394.264	484.008	476.034	412.317	1.22762	0.0451773	0.128171	2
Q91VY9	Zinc finger protein 622 OS=Mus musculus OX=10090 GN=Znf622 PE=1 SV=1	4	2	3	616.26	559.212	571.926	642.762	728.028	703.912	690.946	754.437	704.561	574.089	482.381	543.66	581.96	690.62	716.136	531.984	1.34616	0.00144269	0.0146319	2
Q91VX2	Ubiquitin-associated protein 2 OS=Mus musculus OX=10090 GN=Ubap2 PE=1 SV=1	5	2	3	434.565	336.981	386.207	404.636	543.391	428.997	522.87	517.128	539.71	400.321	364.893	407.478	383.849	455.208	526.483	390.445	1.37159	0.0199516	0.0748824	2
Q9D0N7	Chromatin assembly factor 1 subunit B OS=Mus musculus OX=10090 GN=Chaf1b PE=1 SV=1	4	4	4	476.69	392.016	464.091	509.635	550.605	502.836	646.843	701.503	637.165	494.762	483.806	523.838	442.637	520.605	661.242	500.52	1.49387	0.000553128	0.00846684	2
Q8BLF1	Neutral cholesterol ester hydrolase 1 OS=Mus musculus OX=10090 GN=Nceh1 PE=1 SV=1	4	7	7	716.998	779.076	763.718	898.362	778.641	891.341	917.055	896.738	877.918	704.032	781.99	703.468	752.795	854.301	897.095	728.919	1.23072	0.00522388	0.0321111	2
Q9CQ79	Thioredoxin domain-containing protein 9 OS=Mus musculus OX=10090 GN=Txndc9 PE=1 SV=1	3	3	3	377.271	393.977	383.346	486.774	491.09	451.59	484.856	517.624	519.668	378.282	324.492	372.579	384.803	476.151	507.128	357.613	1.41809	0.000109009	0.00315185	2
Q9WUU7	Cathepsin Z OS=Mus musculus OX=10090 GN=Ctsz PE=1 SV=1	4	4	5	1419.96	1420.3	1496.1	1803.27	1651.18	1749.26	1681.8	1830.3	1552.26	1372.62	1375.86	1480.02	1445.01	1733.42	1684.3	1408.63	1.23057	0.00281645	0.0217872	2
Q64337	Sequestosome-1 OS=Mus musculus OX=10090 GN=Sqstm1 PE=1 SV=1	11	8	8	1021.59	1028.91	1192.45	1810.72	1749	1558.66	1666.21	1732.61	1488.45	928.973	916.972	1187.93	1078.2	1702.67	1625.75	1003.96	1.69595	0.000336648	0.00654299	2
P62281	40S ribosomal protein S11 OS=Mus musculus OX=10090 GN=Rps11 PE=1 SV=3	7	8	8	4264.12	3808.5	3793.26	4055.09	4454.2	4222.18	4700.83	4675.46	4949.39	4145.15	4227.04	4200.36	3949.41	4240.68	4773.65	4190.71	1.2087	0.00469053	0.0300142	2
Q6NSQ7	Protein LTV1 homolog OS=Mus musculus OX=10090 GN=Ltv1 PE=1 SV=2	2	1	2	67.6129	67.6017	84.9027	95.5293	94.601	78.977	96.9605	113.119	95.5996	86.5639	71.3447	87.1872	72.9406	89.3671	101.593	81.3549	1.39281	0.035368	0.108359	2
P20060	Beta-hexosaminidase subunit beta OS=Mus musculus OX=10090 GN=Hexb PE=1 SV=2	4	8	7	1663.82	1388.26	1500.31	1651.56	1802.65	1707.54	1686.24	1840.25	1934.11	1660.42	1630.88	1520.09	1513.28	1719.46	1817.3	1602.64	1.2009	0.0400838	0.118158	2
Q6A0A9	Constitutive coactivator of PPAR-gamma-like protein 1 OS=Mus musculus OX=10090 GN=FAM120A PE=1 SV=2	9	7	7	1409.39	1234.72	1306.19	1442.92	1546.59	1429.4	1562.34	1610.76	1640.5	1354.03	1376.61	1392.58	1314.83	1472.05	1604.21	1374.32	1.22009	0.00202978	0.0177048	2
P18653	Ribosomal protein S6 kinase alpha-1 OS=Mus musculus OX=10090 GN=Rps6ka1 PE=1 SV=1	7	3	3	243.564	262.069	278.874	303.175	275.177	312.293	286.724	309.938	297.932	262.597	248.875	206.962	261.103	296.453	298.048	238.261	1.25093	0.0256024	0.0884961	2
P97855	Ras GTPase-activating protein-binding protein 1 OS=Mus musculus OX=10090 GN=G3bp1 PE=1 SV=1	6	8	7	649.422	583.546	624.845	655.432	832.395	679.036	748.213	746.6	785.291	681.478	572.004	645.373	618.669	718.207	759.827	631.278	1.22816	0.0467018	0.130832	2
Q9Z0W3	Nuclear pore complex protein Nup160 OS=Mus musculus OX=10090 GN=Nup160 PE=1 SV=2	5	6	6	298.322	348.054	324.879	403.877	375.455	391.077	392.876	368.194	373.55	309.129	312.501	314.698	323.11	389.963	378.06	312.101	1.24948	0.000727134	0.00967731	2
E9Q634	Unconventional myosin-Ie OS=Mus musculus OX=10090 GN=Myo1e PE=1 SV=1	10	14	22	1541.79	1583.05	1519.72	1811.69	1774.86	1887.56	1875.87	1927.11	1823.39	1476.52	1420.85	1475.2	1547.97	1824.1	1874.98	1457.29	1.28662	4.78429e-06	0.000533563	2
P15626	Glutathione S-transferase Mu 2 OS=Mus musculus OX=10090 GN=Gstm2 PE=1 SV=2	6	9	9	2097.1	2318.92	2399.86	2780.99	2536.19	2585.03	2785.2	2924.34	2603.83	2382.38	2266.21	2456.95	2268.28	2631.98	2768	2367.21	1.22031	0.00785007	0.0409919	2
Q03958	Prefoldin subunit 6 OS=Mus musculus OX=10090 GN=Pfdn6 PE=1 SV=1	6	7	5	1017.93	945.77	1030.82	1133.78	1242.59	1102.71	1061.68	1111.56	1198.59	997.707	911.169	878.963	997.459	1158.17	1122.53	927.949	1.2481	0.00591901	0.0343978	2
P28063	Proteasome subunit beta type-8 OS=Mus musculus OX=10090 GN=Psmb8 PE=1 SV=2	1	3	2	349.448	341.192	332.002	470.242	385.653	461.724	434.149	492.064	486.684	337.837	372.766	311.266	340.806	437.489	470.222	339.697	1.38424	0.00178047	0.0166102	2
P62983	Ubiquitin-40S ribosomal protein S27a OS=Mus musculus OX=10090 GN=Rps27a PE=1 SV=2	8	11	8	7787.57	7561.26	8066.76	8050.66	8812.29	8194.27	7286.91	7245.34	7717.98	7311.31	6817.57	6457.45	7802.46	8345.97	7413.7	6853.23	1.21782	0.00464122	0.0298619	2
Q3UZ39	Leucine-rich repeat flightless-interacting protein 1 OS=Mus musculus OX=10090 GN=Lrrfip1 PE=1 SV=2	12	12	21	2428.01	2450.35	2382.09	2676.43	2663.5	2678.04	2784.8	2921.35	2738.9	2357.78	2211.82	2447.99	2419.98	2672.65	2813.96	2337.16	1.20401	0.000300944	0.00624319	2
P70372	ELAV-like protein 1 OS=Mus musculus OX=10090 GN=Elavl1 PE=1 SV=2	4	4	5	564.51	604.856	596.628	698.711	648.779	648.78	774.787	698.102	761.257	560.992	647.264	592.336	588.404	665.014	743.951	599.15	1.26435	0.0023349	0.0192547	2
Q78XF5	Oligosaccharyltransferase complex subunit OSTC OS=Mus musculus OX=10090 GN=Ostc PE=1 SV=1	1	1	1	114.433	97.8601	121.226	116.051	142.94	128.784	149.551	137.618	136.213	121.986	123.603	115.799	110.726	128.792	141.003	120.415	1.27343	0.0360416	0.109765	2
Q8BWW4	La-related protein 4 OS=Mus musculus OX=10090 GN=Larp4 PE=1 SV=2	5	5	4	439.677	441.306	453.905	480.135	568.974	527.234	557.227	570.319	572.577	541.532	437.971	464.854	444.918	524.187	566.667	479.508	1.27364	0.0140024	0.0591408	2
Q9D104	Signal recognition particle 19 kDa protein OS=Mus musculus OX=10090 GN=Srp19 PE=1 SV=1	2	3	1	136.397	123.072	126.773	147.191	161.358	160.864	146.227	156.702	155.605	133.467	122.151	120.041	128.626	156.331	152.771	125.083	1.24981	0.00106252	0.0122885	2
Q3TQI7	Telomere length and silencing protein 1 homolog OS=Mus musculus OX=10090 PE=1 SV=2	1	2	1	130.604	131.525	126.829	159.669	155.741	153.968	155.652	156.689	173.752	123.279	125.248	114.653	129.637	156.441	161.823	120.971	1.3377	5.54481e-05	0.00212639	2
P26369	Splicing factor U2AF 65 kDa subunit OS=Mus musculus OX=10090 GN=U2af2 PE=1 SV=3	8	9	9	1201.62	1024.03	1103.31	1175.78	1317.71	1187.28	1281.3	1337.24	1405.96	1224.72	1204.44	1186.87	1107.28	1225.28	1340.53	1205.24	1.21065	0.0213755	0.0783628	2
P62270	40S ribosomal protein S18 OS=Mus musculus OX=10090 GN=Rps18 PE=1 SV=3	7	9	9	3023.86	2827.78	2828.04	3221.74	3359.12	3154.55	3403.83	3399.03	3658.11	3053.83	3117.31	3062.55	2891.77	3244.02	3484.92	3077.77	1.20512	0.000774398	0.00995994	2
Q9CQ22	Ragulator complex protein LAMTOR1 OS=Mus musculus OX=10090 GN=Lamtor1 PE=1 SV=1	2	4	1	182.833	216.404	197.846	262.801	215.649	239.415	234.148	224.936	235.899	180.911	203.705	187.533	198.556	238.511	231.61	190.479	1.25216	0.0126017	0.0551133	2
Q9CQY6	Ubiquinol-cytochrome-c reductase complex assembly factor 2 OS=Mus musculus OX=10090 GN=Uqcc2 PE=1 SV=1	1	1	4	205.524	209.7	211.775	223.635	191.025	209.233	226.167	232.276	200.388	157.803	180.129	191.734	208.984	207.533	219.164	175.981	1.24538	0.0324683	0.102068	2
P97333	Neuropilin-1 OS=Mus musculus OX=10090 GN=Nrp1 PE=1 SV=2	1	3	3	232.792	246.257	274.326	334.6	336.506	320.039	344.992	338.706	311.225	273.337	264.252	280.13	250.538	330.299	331.311	272.495	1.3224	0.000416808	0.00716582	2
P02463	Collagen alpha-1(IV) chain OS=Mus musculus OX=10090 GN=Col4a1 PE=1 SV=4	2	2	2	204.058	179.789	196.564	253.753	267.125	269.133	202.477	205.067	197.141	216.874	225.182	214.324	193.2	263.248	201.535	218.745	1.36257	5.6292e-05	0.00212639	2
Q9CWN7	CCR4-NOT transcription complex subunit 11 OS=Mus musculus OX=10090 GN=Cnot11 PE=1 SV=1	3	2	3	411.905	387.099	398.067	444.41	504.228	463.235	447.152	480.566	510.884	472.178	403.752	403.459	398.895	469.971	478.825	425.278	1.20038	0.0306615	0.0985712	2
P20352	Tissue factor OS=Mus musculus OX=10090 GN=F3 PE=1 SV=2	3	2	3	344.544	357.391	361.2	482.335	417.781	462.141	449.587	460.811	415.962	311.757	352.239	348.919	354.306	453.27	441.703	337.126	1.34451	0.000434251	0.00736967	2
Q91WV0	Protein Dr1 OS=Mus musculus OX=10090 GN=Dr1 PE=1 SV=1	2	2	3	557.951	569.917	579.071	586.061	634.677	627.124	662.495	646.065	649.726	572.421	528.27	523.008	568.914	615.578	652.724	540.788	1.20699	0.000741318	0.00980886	2
P62849	40S ribosomal protein S24 OS=Mus musculus OX=10090 GN=Rps24 PE=1 SV=1	6	6	6	2155.09	1942.18	1849.01	2159.47	2340.01	2198.01	2411.84	2394.33	2631.11	1997.59	2047.46	2045.84	1978.02	2231.17	2476.8	2030.16	1.25216	0.00281986	0.0217872	2
P14901	Heme oxygenase 1 OS=Mus musculus OX=10090 GN=Hmox1 PE=1 SV=1	5	7	3	373.045	370.431	327.471	735.793	709.892	764.146	490.721	491.688	526.823	359.067	386.616	340.187	356.353	736.277	502.801	361.458	2.06615	6.96997e-07	0.000225547	2
P97287	Induced myeloid leukemia cell differentiation protein Mcl-1 homolog OS=Mus musculus OX=10090 GN=Mcl1 PE=1 SV=3	1	1	1	25.2262	28.7256	31.2958	53.0983	42.8147	35.1926	30.1018	38.3009	32.8503	25.0278	23.613	34.1156	28.3053	43.0899	33.5826	27.2171	1.58319	0.0328679	0.103048	2
P28656	Nucleosome assembly protein 1-like 1 OS=Mus musculus OX=10090 GN=Nap1l1 PE=1 SV=2	6	3	8	1056.87	1009.36	1027.61	1088.45	1178.21	1092.48	1205.03	1345.93	1261.1	1013.64	830.499	982.817	1031.09	1118.96	1269.38	938.784	1.35215	0.00287098	0.0220454	2
Q8BGD9	Eukaryotic translation initiation factor 4B OS=Mus musculus OX=10090 GN=Eif4b PE=1 SV=1	14	16	15	2933.28	2702.15	2678.25	2943.54	3105.16	3108.76	3325.97	3637.89	3380	2754.19	2511.79	2789.98	2768.88	3051.5	3445.31	2682.41	1.28441	0.000815177	0.0103276	2
Q6XLQ8	Calumenin OS=Mus musculus OX=10090 GN=Calu PE=1 SV=1	3	29	3	4029.36	4453.33	4066.96	5034.74	4417.71	5113.82	5214.05	4653.76	4952.76	3656.22	4409.58	3800.84	4178.91	4845.14	4934.87	3942.48	1.25172	0.0155158	0.0634172	2
Q8K409	DNA polymerase beta OS=Mus musculus OX=10090 GN=Polb PE=1 SV=3	1	3	1	89.0738	97.3802	98.3336	127.344	102.858	105.386	104.254	106.389	115.304	87.0676	101.113	88.7166	94.8362	111.344	108.545	92.0922	1.20905	0.047596	0.132623	2
Q9DBR7	Protein phosphatase 1 regulatory subunit 12A OS=Mus musculus OX=10090 GN=Ppp1r12a PE=1 SV=2	15	10	13	2313.09	2425.76	2234.59	2602.54	2453.14	2603.31	2873.08	2919.41	3103.68	2332.98	2323.39	2180.12	2323.16	2552.01	2963.74	2277.74	1.30117	0.000119749	0.00333872	2
P48678	Prelamin-A/C OS=Mus musculus OX=10090 GN=Lmna PE=1 SV=2	12	8	12	1375.57	1238.4	1158.19	1457.02	1495.75	1634.45	1470.69	1577.55	1559.51	1436.99	1428.58	1388.13	1254.22	1527.21	1535.2	1417.74	1.22402	0.0078324	0.0409453	2
Q9R099	Transducin beta-like protein 2 OS=Mus musculus OX=10090 GN=Tbl2 PE=1 SV=2	1	3	1	236.176	215.632	201.475	221.605	257.503	245.89	271.75	262.671	275.07	216.391	210.116	223.486	217.298	241.194	269.779	216.596	1.24554	0.00527765	0.0321882	2
Q9CQS5	Serine/threonine-protein kinase RIO2 OS=Mus musculus OX=10090 GN=Riok2 PE=1 SV=1	5	5	1	239.873	255.957	159.614	282.844	291.01	338.293	315.909	300.898	371.239	230.791	221.552	200.271	213.996	303.098	328.003	217.155	1.53275	0.0159845	0.0647116	2
Q9CZN7	Serine hydroxymethyltransferase, mitochondrial OS=Mus musculus OX=10090 GN=Shmt2 PE=1 SV=1	31	32	36	9988.41	9868.6	9557.07	8571.22	8583.95	8229.82	8116.96	7849.43	8338.08	8864.55	9239.16	9416.17	9803	8460.06	8099.02	9170.39	1.21039	0.000116527	0.00326834	3
Q04857	Collagen alpha-1(VI) chain OS=Mus musculus OX=10090 GN=Col6a1 PE=1 SV=1	24	19	20	3153.77	3158.59	3221.74	3143.82	3000.88	2977.28	2157.19	2303.03	2227.99	3227.82	3220.1	3255.58	3177.89	3039.78	2228.61	3234.46	1.45134	1.2691e-07	9.8089e-05	3
Q8K0T4	Katanin p60 ATPase-containing subunit A-like 1 OS=Mus musculus OX=10090 GN=Katnal1 PE=1 SV=1	3	1	1	159.531	152.108	161.321	125.806	131.313	126.425	137.224	123.971	101.744	141.854	157.022	174.925	157.602	127.824	120.066	157.356	1.31263	0.0142994	0.0600705	3
Q8K2C7	Protein OS-9 OS=Mus musculus OX=10090 GN=Os9 PE=1 SV=2	3	1	3	576.309	567.352	575.294	579.261	633.323	530.102	481.03	430.027	461.935	543.815	549.713	613.084	572.971	579.366	457.175	568.027	1.26727	0.0045212	0.029536	3
Q8CFE6	Sodium-coupled neutral amino acid transporter 2 OS=Mus musculus OX=10090 GN=Slc38a2 PE=1 SV=1	2	3	4	456.333	478.276	415.775	321.011	362.908	367.144	359.295	303.353	354.135	402.659	394.762	402.245	449.372	349.718	337.953	399.872	1.32969	0.00379185	0.0262349	3
Q3U962	Collagen alpha-2(V) chain OS=Mus musculus OX=10090 GN=Col5a2 PE=1 SV=1	9	9	8	1573.43	1612.61	1709.37	1590.51	1677.29	1412.22	1236.15	1152.15	1127.19	1656.9	1614.93	1808.2	1630.82	1556.02	1170.92	1691.34	1.44446	0.000330141	0.00654299	3
Q9CQX2	Cytochrome b5 type B OS=Mus musculus OX=10090 GN=Cyb5b PE=1 SV=1	6	4	3	635.781	678.977	718.689	543.26	631.392	560.856	582.246	578.778	579.649	776.123	648.263	678.216	676.967	577.279	580.223	698.796	1.2105	0.0158058	0.0643802	3
Q3TPE9	Ankyrin repeat and MYND domain-containing protein 2 OS=Mus musculus OX=10090 GN=Ankmy2 PE=1 SV=1	4	3	4	234.162	263.959	250.531	227.432	214.068	233.027	204.513	202.814	199.685	271.408	256.674	254.272	249.252	224.7	202.327	260.676	1.28838	0.000309908	0.00631134	3
Q61207	Prosaposin OS=Mus musculus OX=10090 GN=Psap PE=1 SV=2	8	11	10	2835.05	3222.55	3005.27	2978.35	2776.21	2909.51	2538.33	2153.25	2489.23	2476.44	2676.16	2424.15	3016.81	2886.8	2387.28	2523.28	1.2637	0.00603744	0.0349128	3
O88967	ATP-dependent zinc metalloprotease YME1L1 OS=Mus musculus OX=10090 GN=Yme1l1 PE=1 SV=1	2	1	3	159.468	205.294	171.216	154.352	143.359	142.822	137.201	109.786	130.528	159.939	152.52	166.393	177.636	146.75	125.277	159.516	1.41795	0.0101456	0.047809	3
Q9JIX0	Transcription and mRNA export factor ENY2 OS=Mus musculus OX=10090 GN=Eny2 PE=1 SV=1	3	3	1	361.801	313.768	341.065	298.019	337.139	298.244	256.387	277.116	276.185	318.008	306.191	318.72	338.303	310.605	269.724	314.253	1.25426	0.00713196	0.0388443	3
Q9D6U8	Protein FAM162A OS=Mus musculus OX=10090 GN=Fam162a PE=1 SV=1	3	4	3	341.992	333.809	355.419	322.043	330.612	297.32	294.993	278.323	270.222	327.663	343.947	363.731	343.625	316.339	280.992	344.799	1.22708	0.00212059	0.0182593	3
Q61292	Laminin subunit beta-2 OS=Mus musculus OX=10090 GN=Lamb2 PE=1 SV=2	16	11	14	1435.4	1410.44	1495.31	1434.83	1491.84	1487.77	1276.24	1260.99	1274.13	1605.89	1589.08	1495.14	1446.61	1471.25	1270.44	1562.6	1.22997	8.96245e-05	0.0028365	3
O35593	26S proteasome non-ATPase regulatory subunit 14 OS=Mus musculus OX=10090 GN=Psmd14 PE=1 SV=2	15	14	15	1982.1	2040.34	1893.1	1684.52	1727.15	1815.05	1621.19	1577.74	1812.41	2181.46	2124.05	1948.71	1970.91	1741.4	1667.41	2082.35	1.24886	0.00324902	0.0235735	3
Q9JKK1	Syntaxin-6 OS=Mus musculus OX=10090 GN=Stx6 PE=1 SV=1	1	3	1	51.9978	41.6908	48.2942	37.6241	36.1432	35.6884	38.1353	40.3822	40.4677	34.0129	43.554	37.3198	47.131	36.4759	39.6468	38.0952	1.29211	0.0302559	0.0978043	3
P28301	Protein-lysine 6-oxidase OS=Mus musculus OX=10090 GN=Lox PE=1 SV=1	2	1	1	61.7909	64.3167	56.7708	53.8736	59.8475	60.2344	43.1983	30.2851	38.8514	61.1168	65.5302	64.1231	60.8777	57.9103	37.0426	63.5632	1.71595	0.000678781	0.00940081	3
Q9WUH1	Transmembrane protein 115 OS=Mus musculus OX=10090 GN=Tmem115 PE=1 SV=1	1	1	1	30.1616	37.6417	31.5097	24.0823	22.1226	29.294	25.3583	21.9308	24.1936	33.4607	31.3678	28.0655	32.95	24.9903	23.7843	30.8838	1.38537	0.0167221	0.0670029	3
O55176	E3 ubiquitin-protein ligase Praja-1 OS=Mus musculus OX=10090 GN=Pja1 PE=1 SV=3	1	1	1	98.7821	102.617	102.765	47.7395	63.1347	38.5822	55.7484	69.4364	53.3277	145.635	112.717	153.23	101.371	48.8103	59.1004	135.998	2.78626	0.000207439	0.00483406	3
A2A8L5	Receptor-type tyrosine-protein phosphatase F OS=Mus musculus OX=10090 GN=Ptprf PE=1 SV=1	7	15	11	1109.93	1195.13	1161.86	988.352	930.99	935.755	809.302	829.757	862.759	1282.91	1234.61	1230.12	1155.1	951.349	833.65	1248.99	1.49821	1.13154e-06	0.000225547	3
Q99K41	EMILIN-1 OS=Mus musculus OX=10090 GN=Emilin1 PE=1 SV=1	3	1	1	36.9456	42.6441	33.9055	30.2853	38.0198	35.1962	27.4887	20.6155	24.7624	40.173	33.6132	41.0285	37.6615	34.3489	24.1202	38.1221	1.58051	0.00568606	0.033756	3
Q6PAV2	Probable E3 ubiquitin-protein ligase HERC4 OS=Mus musculus OX=10090 GN=Herc4 PE=1 SV=2	9	7	7	1226.45	1297.36	1301.11	1192.76	1146.46	1103.3	1101.18	1001.75	1053.02	1187.15	1261.97	1250.11	1274.5	1146.93	1051.2	1232.64	1.21243	0.00128253	0.0138101	3
Q06185	ATP synthase subunit e, mitochondrial OS=Mus musculus OX=10090 GN=Atp5i PE=1 SV=2	2	3	2	736.787	672.593	655.604	529.761	629.721	636.974	566.656	548.536	584.555	661.909	644.263	617.981	687.457	596.738	566.391	641.129	1.21375	0.0284178	0.0943368	3
Q8K449	ATP-binding cassette sub-family A member 9 OS=Mus musculus OX=10090 GN=Abca9 PE=1 SV=2	2	1	3	147.216	133.143	129.738	124.214	139.28	122.325	111.202	104.586	114.437	122.924	128.547	139.056	136.494	128.388	109.998	130.006	1.24088	0.0139096	0.0588553	3
P18911	Retinoic acid receptor gamma OS=Mus musculus OX=10090 GN=Rarg PE=1 SV=3	1	1	1	62.2114	60.9196	66.2609	61.4911	50.8153	48.893	47.335	53.3792	55.2009	66.464	72.3873	67.1466	63.0901	53.4586	51.8601	68.6159	1.3231	0.00756061	0.0401974	3
Q80ZK9	WD and tetratricopeptide repeats protein 1 OS=Mus musculus OX=10090 GN=Wdtc1 PE=1 SV=1	2	2	2	431.902	442.841	395.949	364.658	377.731	374.164	304.397	330.93	367.212	436.009	385.463	399.641	423.081	372.143	333.194	406.49	1.26977	0.00829789	0.0424406	3
P08207	Protein S100-A10 OS=Mus musculus OX=10090 GN=S100a10 PE=1 SV=2	4	5	3	1538.58	1634.95	1344.53	1402.38	1342.06	1358.5	1161.68	1032.97	1173.9	1165.06	1257.71	1390.76	1501.06	1367.41	1120.99	1267.82	1.33905	0.00927967	0.045136	3
Q920A5	Retinoid-inducible serine carboxypeptidase OS=Mus musculus OX=10090 GN=Scpep1 PE=1 SV=2	17	14	19	6548.65	6747.36	6899.44	5933.96	5864.86	5621.86	4806.32	4873.58	4706.4	6838.49	6641.62	6899.72	6730.28	5805.34	4794.94	6792.38	1.41657	2.58529e-07	0.00011318	3
Q99KI3	ER membrane protein complex subunit 3 OS=Mus musculus OX=10090 GN=Emc3 PE=1 SV=3	3	5	2	255.335	222.229	232.158	179.399	198.596	197.422	193.424	195.043	189.667	210.673	222.962	219.584	236.174	191.6	192.698	217.677	1.23264	0.00185841	0.0169684	3
Q9QZN4	F-box only protein 6 OS=Mus musculus OX=10090 GN=Fbxo6 PE=1 SV=1	3	1	2	203.744	234.477	215.742	194.455	215.983	184.311	178.436	158.449	183.447	217.155	184.88	210.289	217.624	197.817	173.099	203.622	1.25722	0.0400781	0.118158	3
Q02788	Collagen alpha-2(VI) chain OS=Mus musculus OX=10090 GN=Col6a2 PE=1 SV=3	9	9	11	1422.72	1422.9	1404.3	1337.46	1295.56	1267.51	882.756	953.019	1030.82	1553.91	1525.38	1494.22	1416.61	1299.86	953.62	1524.31	1.59844	4.13825e-06	0.000480187	3
B1B212	Histocompatibility antigen 60b OS=Mus musculus OX=10090 GN=H60b PE=2 SV=1	1	1	1	256.928	268.53	269.467	262.707	269.746	252.469	210.927	230.307	232.147	296.55	258.528	273.029	264.913	261.544	224.251	275.595	1.22896	0.00384993	0.0264803	3
P12023	Amyloid-beta A4 protein OS=Mus musculus OX=10090 GN=App PE=1 SV=3	5	3	3	448.136	430.415	459.473	387.279	378.865	361.095	323.373	299.617	314.705	484.185	534.076	507.699	445.847	375.587	312.41	508.245	1.62685	2.04603e-06	0.000319454	3
Q9JI39	ATP-binding cassette sub-family B member 10, mitochondrial OS=Mus musculus OX=10090 GN=Abcb10 PE=1 SV=1	1	3	5	68.1212	71.5874	54.8827	52.6432	42.5593	51.7638	24.0651	39.5214	44.7323	56.8181	47.9795	50.2688	64.4444	48.7664	34.9098	51.5562	1.84603	0.0279235	0.0935191	3
P50096	Inosine-5'-monophosphate dehydrogenase 1 OS=Mus musculus OX=10090 GN=Impdh1 PE=1 SV=2	4	4	1	415.219	376.582	384.236	361.937	330.813	283.451	286.664	308.371	275.632	325.113	373.168	445.614	391.662	323.766	289.907	378.123	1.35099	0.0293054	0.0955347	3
Q6R0H7	Guanine nucleotide-binding protein G(s) subunit alpha isoforms XLas OS=Mus musculus OX=10090 GN=Gnas PE=1 SV=1	15	15	14	3451.75	3421.03	3398.24	3120.39	3016.63	3080.01	2884.68	2799.33	2847.31	2729.72	2949.55	2860.99	3423.6	3072.04	2843.56	2845.31	1.20399	2.58232e-05	0.00150555	3
B0V2N1	Receptor-type tyrosine-protein phosphatase S OS=Mus musculus OX=10090 GN=Ptprs PE=1 SV=1	5	6	1	173.857	168.951	182.271	146.539	160.593	119.166	137.804	128.897	141.55	179.977	179.737	195.19	174.94	141.019	135.979	184.829	1.35925	0.00500669	0.0312547	3
P15702	Leukosialin OS=Mus musculus OX=10090 GN=Spn PE=1 SV=1	2	1	1	84.001	84.9949	78.5732	80.3649	84.8973	80.2215	70.4861	64.0964	69.5215	83.2178	84.0811	89.7535	82.474	81.7995	67.9755	85.6358	1.2598	0.00064868	0.00920733	3
Q8CGY8	UDP-N-acetylglucosamine--peptide N-acetylglucosaminyltransferase 110 kDa subunit OS=Mus musculus OX=10090 GN=Ogt PE=1 SV=2	16	17	14	2509.97	2391.65	2384.02	2081.24	2105.42	2162.63	1991.17	2020.78	1926.98	2346.46	2410.99	2455.22	2427.87	2116.15	1979.26	2403.81	1.22666	1.45546e-05	0.00108212	3
Q99LL3	Carbohydrate sulfotransferase 12 OS=Mus musculus OX=10090 GN=Chst12 PE=2 SV=2	1	1	1	81.2629	73.9043	80.7844	68.3789	73.716	61.4718	56.5337	62.9666	55.7126	77.5918	73.1802	85.7984	78.5772	67.6685	58.3164	78.6858	1.34929	0.00316445	0.0233422	3
P62806	Histone H4 OS=Mus musculus OX=10090 GN=Hist1h4a PE=1 SV=2	8	7	5	2549.85	2467.1	2315.2	1933.03	2090.46	2416.87	1894.97	1921.1	1819.29	2692.05	2591.23	2518.53	2442.1	2137.52	1877.96	2599.63	1.38429	0.00129829	0.0139477	3
Q8BWY9	Protein CIP2A OS=Mus musculus OX=10090 GN=Cip2a PE=1 SV=3	10	10	6	1396.6	1442.35	1405.31	1272.44	1315.23	1249.61	1166.22	1110.74	1106.69	1361.88	1328.81	1435.52	1414.62	1278.81	1127.56	1374.69	1.25458	5.22762e-05	0.00211088	3
A3KGW5	Inactive glycosyltransferase 25 family member 3 OS=Mus musculus OX=10090 GN=Cercam PE=3 SV=1	2	2	2	577.256	562.068	592.206	596.755	584.169	551.543	420.639	479.977	458.52	581.349	549.784	573.73	577.046	577.171	452.372	568.127	1.27588	0.00030847	0.00630949	3
A0A2I3BQS6	E3 ubiquitin-protein ligase UBR5 OS=Mus musculus OX=10090 GN=Ubr5 PE=1 SV=1	7	5	8	636.994	629.701	590.671	572.131	539.106	566.179	471.172	475.512	522.262	596.991	632.969	598.177	618.783	558.952	489.114	609.153	1.26511	0.000459728	0.00759543	3
P08752	Guanine nucleotide-binding protein G(i) subunit alpha-2 OS=Mus musculus OX=10090 GN=Gnai2 PE=1 SV=5	9	13	19	2888.5	3017.83	2880.9	2400.47	2450.58	2482.85	2461.99	2198.1	2390.29	2561.51	2645.96	2558.44	2928.41	2444.4	2347.44	2588.32	1.24749	0.000265916	0.00573988	3
O89017	Legumain OS=Mus musculus OX=10090 GN=Lgmn PE=1 SV=1	4	5	3	435.966	466.388	433.827	320.636	348.72	305.298	239.461	219.081	275.893	502.294	464.168	483.338	445.149	324.393	243.703	483.016	1.98199	1.06697e-05	0.000861667	3
Q9Z0M5	Lysosomal acid lipase/cholesteryl ester hydrolase OS=Mus musculus OX=10090 GN=Lipa PE=1 SV=2	2	3	1	267.8	293.647	301.366	274.671	237.798	238.746	224.211	235.502	216.904	275.821	275.555	285.486	287.239	249.834	225.41	278.916	1.2743	0.00278842	0.0216959	3
Q8BM72	Heat shock 70 kDa protein 13 OS=Mus musculus OX=10090 GN=Hspa13 PE=1 SV=1	6	3	4	914.55	1010.16	955.319	816.644	818.211	823.281	833.441	731.14	753.867	960.402	965.524	992.568	959.214	819.374	771.596	972.73	1.26067	0.000366402	0.00681043	3
P15105	Glutamine synthetase OS=Mus musculus OX=10090 GN=Glul PE=1 SV=6	5	9	5	1047.22	1069.12	1175.42	1012.58	1000.18	1020.01	906.351	960.868	864.657	1151.38	1087.36	1057.45	1095.85	1010.89	909.776	1098.04	1.20693	0.00325112	0.0235735	3
P97857	A disintegrin and metalloproteinase with thrombospondin motifs 1 OS=Mus musculus OX=10090 GN=Adamts1 PE=1 SV=4	1	1	1	43.304	45.0886	43.6701	30.1349	31.6814	33.4042	30.5772	34.1369	32.7632	42.13	35.2392	36.3085	44.0142	31.7121	32.4591	37.7754	1.38793	0.000633676	0.00907688	3
Q05895	Thrombospondin-3 OS=Mus musculus OX=10090 GN=Thbs3 PE=1 SV=2	2	1	3	533.173	473.68	470.778	465.331	495.085	417.563	363.286	319.588	409.333	463.429	536.865	527.545	491.726	458.199	362.22	508.201	1.40302	0.00797146	0.0413557	3
Q9WV91	Prostaglandin F2 receptor negative regulator OS=Mus musculus OX=10090 GN=Ptgfrn PE=1 SV=2	6	5	6	1090.85	1096.85	1159.86	1035.37	1041.74	995.477	931.609	942.654	947.93	1172.15	1148.73	1126.71	1115.42	1023.99	940.706	1149.05	1.22147	2.60143e-05	0.00150555	3
Q61024	Asparagine synthetase [glutamine-hydrolyzing] OS=Mus musculus OX=10090 GN=Asns PE=1 SV=3	32	32	33	8427.82	8333.93	7983.99	6680.19	6878.18	6592.06	6181.77	6164.26	6642.9	7486.63	7400.03	7557.45	8246.35	6715.75	6325.83	7481.09	1.3036	1.39268e-05	0.00105215	3
Q8VEM8	Phosphate carrier protein, mitochondrial OS=Mus musculus OX=10090 GN=Slc25a3 PE=1 SV=1	8	10	7	4721.13	4889.54	4715.27	4025.86	4090.26	3872.68	4051.19	3634.08	3833.37	4030.54	4214.84	4407.4	4774.64	3995.22	3835.77	4214.79	1.24477	0.00069408	0.00945079	3
P08121	Collagen alpha-1(III) chain OS=Mus musculus OX=10090 GN=Col3a1 PE=1 SV=4	27	21	19	4880.48	4358.03	4818.74	4873.66	5551.05	4830.6	3247.86	3055.02	3261.79	5019.74	5057.65	5110.61	4679.82	5074.7	3186.81	5062.53	1.59241	1.34825e-05	0.00105215	3
Q61686	Chromobox protein homolog 5 OS=Mus musculus OX=10090 GN=Cbx5 PE=1 SV=1	3	3	1	94.9541	93.8252	102.539	101.62	81.5867	84.376	59.5552	82.8172	67.1966	104.02	101.92	106.038	97.0303	88.7712	69.2037	103.979	1.50251	0.00711886	0.0388181	3
Q8BQ89	LIX1-like protein OS=Mus musculus OX=10090 GN=Lix1l PE=2 SV=2	2	4	2	413.775	417.345	379.089	337.285	365.913	332.052	234.011	250.594	289.955	450.841	402.06	434.816	403.026	344.768	257.146	428.753	1.66735	0.000107966	0.00314107	3
Q922Q1	Mitochondrial amidoxime reducing component 2 OS=Mus musculus OX=10090 GN=Marc2 PE=1 SV=1	6	3	2	691.916	675.305	699.894	642.253	643.459	551.683	564.778	578.745	529.44	740.278	741.716	858.208	688.962	610.903	557.264	778.171	1.39641	0.00134172	0.0140705	3
O88322	Nidogen-2 OS=Mus musculus OX=10090 GN=Nid2 PE=1 SV=2	6	6	4	597.882	575.668	526.54	517.705	514.497	543.679	405.424	456.088	526.456	644.57	619.328	568.906	565.9	525.133	460.016	610.113	1.32629	0.0147957	0.0612761	3
Q8N7N5	DDB1- and CUL4-associated factor 8 OS=Mus musculus OX=10090 GN=Dcaf8 PE=1 SV=1	3	3	3	877.078	904.104	895.774	797.223	775.333	795.899	738.566	753.744	726.56	827.192	806.878	821.825	892.247	789.421	739.54	818.587	1.20649	3.50843e-06	0.000432461	3
P12787	Cytochrome c oxidase subunit 5A, mitochondrial OS=Mus musculus OX=10090 GN=Cox5a PE=1 SV=2	3	2	3	657.467	622.929	598.001	561.629	642.73	567.454	503.059	476.072	545.869	613.861	594.286	624.693	625.66	589.481	507.528	610.817	1.23276	0.00867011	0.0433668	3
Q9R0P6	Signal peptidase complex catalytic subunit SEC11A OS=Mus musculus OX=10090 GN=Sec11a PE=1 SV=1	4	1	2	179.749	160.634	170.634	139.467	160.82	143.072	144.162	136.029	148.199	169.7	175.595	171.173	170.16	147.499	142.706	172.138	1.20624	0.00440758	0.0288743	3
P18242	Cathepsin D OS=Mus musculus OX=10090 GN=Ctsd PE=1 SV=1	10	19	15	4893.36	5226.5	5178.78	5000.52	4803.47	4892.05	4190.14	4257.61	4220.96	5168.24	4964.68	4960.48	5097.4	4898.02	4222.81	5030.21	1.20711	3.83532e-05	0.00178045	3
Q8K2B0	Endoplasmic reticulum protein SC65 OS=Mus musculus OX=10090 GN=P3h4 PE=1 SV=1	2	2	4	208.212	173.13	174.421	179.548	195.064	182.251	132.15	158.188	151.903	177.833	171.362	189.169	184.569	185.499	146.984	179.305	1.26204	0.0184671	0.0715951	3
P06797	Cathepsin L1 OS=Mus musculus OX=10090 GN=Ctsl PE=1 SV=2	2	2	2	482.538	440.922	441.927	389.843	423.293	419.6	353.02	375.607	396.592	444.814	430.394	412.097	454.724	410.634	374.65	428.892	1.21373	0.00752907	0.0400752	3
Q2PZL6	Protocadherin Fat 4 OS=Mus musculus OX=10090 GN=Fat4 PE=1 SV=2	18	17	19	2716.16	2582.04	2837.37	2433.8	2513.65	2314.22	2029.2	2073.04	1933	2680.7	2691.13	2775.27	2709.84	2419.16	2010.89	2715.37	1.35033	2.86256e-05	0.0015591	3
Q8K201	Keratinocyte-associated transmembrane protein 2 OS=Mus musculus OX=10090 GN=Kct2 PE=1 SV=2	1	1	1	161.778	163.774	174.681	130.287	142.055	131.933	109.646	104.81	113.766	189.412	180.486	170.744	166.649	134.659	109.346	180.052	1.64663	3.69768e-06	0.000444101	3
Q8BGT5	Alanine aminotransferase 2 OS=Mus musculus OX=10090 GN=Gpt2 PE=1 SV=1	16	13	14	2343.08	2432.24	2387.66	1992.24	2007.85	1929.33	1937.34	1906.38	1942.88	2265.15	2191.34	2277.93	2387.38	1976.18	1928.8	2244.48	1.23775	1.45506e-06	0.000262135	3
A0A286YD76	Microtubule-actin cross-linking factor 1 (Fragment) OS=Mus musculus OX=10090 GN=Macf1 PE=1 SV=1	2	3	4	274.33	268.039	261.485	231.056	240.852	239.656	214.081	222.616	224.339	269.03	256.992	263.018	267.9	237.148	220.299	262.968	1.21607	2.35514e-05	0.00143287	3
Q9QZF2	Glypican-1 OS=Mus musculus OX=10090 GN=Gpc1 PE=1 SV=1	6	11	12	1635.12	1645.49	1661.02	1830.1	1739.6	1702.92	1422.13	1481.37	1498.71	1752.54	1773.42	1777.24	1647.17	1756.73	1467.03	1767.7	1.20495	3.66994e-05	0.00178045	3
P11087	Collagen alpha-1(I) chain OS=Mus musculus OX=10090 GN=Col1a1 PE=1 SV=4	25	32	34	4348.63	4082.49	4369.1	5034.95	5538.61	4572.84	3205.98	3088.81	3455	4521.32	4400.98	4713.95	4264.71	5033.39	3246.38	4543.6	1.55046	0.000135924	0.00368017	3
Q9DBV4	Matrix remodeling-associated protein 8 OS=Mus musculus OX=10090 GN=Mxra8 PE=1 SV=1	3	5	4	871.665	888.686	930.973	855.809	837.425	846.548	808.158	764.687	708.243	894.825	939.658	944.693	896.764	846.561	759.254	926.118	1.21977	0.00151789	0.0150265	3
Q91V01	Lysophospholipid acyltransferase 5 OS=Mus musculus OX=10090 GN=Lpcat3 PE=1 SV=1	1	2	2	210.052	232.112	224.293	203.724	178.15	186.536	162.786	189.293	173.062	237.253	214.261	229.924	221.963	189.175	174.71	226.941	1.29896	0.00237117	0.0194171	3
Q9D7V9	N-acylethanolamine-hydrolyzing acid amidase OS=Mus musculus OX=10090 GN=Naaa PE=1 SV=2	2	3	6	240.689	249.981	252.64	230.612	212.77	208.569	192.23	188.805	170.054	234.172	246.145	266.439	247.717	217.11	183.431	248.566	1.35509	0.000419179	0.00716582	3
Q8R079	Bifunctional apoptosis regulator OS=Mus musculus OX=10090 GN=Bfar PE=1 SV=1	1	1	1	53.3479	44.1445	47.7234	33.7638	40.1477	36.048	33.3726	32.844	35.2487	41.1425	44.4905	42.6065	48.2586	36.5593	33.8062	42.7246	1.42751	0.0010784	0.0123804	3
Q00560	Interleukin-6 receptor subunit beta OS=Mus musculus OX=10090 GN=Il6st PE=1 SV=2	2	2	2	337.381	329.675	302.647	306.023	286.809	319.952	239.998	249.74	270.545	310.138	327.316	300.396	322.885	303.956	253.111	312.42	1.27566	0.00250151	0.0200292	3
Q61810	Latent-transforming growth factor beta-binding protein 3 OS=Mus musculus OX=10090 GN=Ltbp3 PE=1 SV=3	1	1	3	238	250.69	230.401	279.564	271.917	226.477	191.587	185.165	228.893	228.475	229.854	251.854	239.552	258.214	200.995	236.49	1.28468	0.0432979	0.12389	3
Q9Z0L8	Gamma-glutamyl hydrolase OS=Mus musculus OX=10090 GN=Ggh PE=1 SV=2	3	5	4	832.682	854.804	813.973	785.817	745.484	743.257	697.288	678.141	671.475	821.796	859.154	908.878	833.653	757.937	682.214	862.542	1.26433	0.000111923	0.0032099	3
P56375	Acylphosphatase-2 OS=Mus musculus OX=10090 GN=Acyp2 PE=1 SV=2	3	2	4	251.041	282.667	246.151	235.961	190.559	238.363	219.134	194.833	215.828	245.291	283.368	251.084	259.462	220.48	209.649	259.389	1.2376	0.0371279	0.112343	3
P70290	55 kDa erythrocyte membrane protein OS=Mus musculus OX=10090 GN=Mpp1 PE=1 SV=1	8	7	12	1070.74	1109.08	1078.34	911.998	1001.26	954.176	924.459	817.135	880.49	1054.89	1034.62	1049.09	1085.93	955.116	872.908	1046.17	1.24403	0.000687269	0.00941278	3
Q07076	Annexin A7 OS=Mus musculus OX=10090 GN=Anxa7 PE=1 SV=2	8	11	10	2122.53	2321.59	2353.29	2170.65	1920.72	2155.85	1893.06	1959.8	1499.51	2198.03	2182.15	2375.61	2263.45	2079.18	1771.91	2250.25	1.27741	0.0307166	0.0986807	3
Q9CQQ7	ATP synthase F(0) complex subunit B1, mitochondrial OS=Mus musculus OX=10090 GN=Atp5f1 PE=1 SV=1	5	4	5	1009.08	1041.44	973.234	852.656	779.503	882.06	851.528	750.878	820.312	942.411	1083.85	980.072	1007.53	836.944	806.459	1000.36	1.24933	0.00309197	0.0231116	3
Q8JZK9	Hydroxymethylglutaryl-CoA synthase, cytoplasmic OS=Mus musculus OX=10090 GN=Hmgcs1 PE=1 SV=1	15	15	19	4784.17	4787.63	4852.58	4756.87	4917.47	4455.5	3746.53	3749.43	3835.32	4365.5	4198.53	4509.67	4808.02	4706.01	3776.87	4356.04	1.27302	5.74548e-05	0.00215295	3
P00405	Cytochrome c oxidase subunit 2 OS=Mus musculus OX=10090 GN=Mtco2 PE=1 SV=1	3	2	3	359.368	339.245	344.754	299.589	315.013	302.887	266.78	282.686	273.515	306.248	295.039	310.828	347.686	305.758	274.25	303.965	1.26777	5.4014e-05	0.00212639	3
Q8VDI7	Ubiquitin-associated domain-containing protein 1 OS=Mus musculus OX=10090 GN=Ubac1 PE=1 SV=2	1	2	1	92.4519	95.5123	100.335	91.4199	99.4645	94.1684	86.2871	67.96	82.5731	83.7597	90.9819	76.842	96.0453	94.9594	78.5258	83.6622	1.2231	0.0433273	0.123898	3
Q62165	Dystroglycan OS=Mus musculus OX=10090 GN=Dag1 PE=1 SV=4	6	3	8	677.028	752.759	703.507	656.207	651.723	641.597	594.292	570.37	579.119	731.451	684.127	734.756	710.412	649.813	581.177	716.399	1.23267	0.000291868	0.0061139	3
P17809	Solute carrier family 2, facilitated glucose transporter member 1 OS=Mus musculus OX=10090 GN=Slc2a1 PE=1 SV=4	4	5	4	745.686	684.092	622.36	451.898	559.568	543.053	470.008	463.138	554.848	702.906	663.7	650.236	682.188	515.915	494.307	671.914	1.38009	0.00383392	0.0264138	3
P67778	Prohibitin OS=Mus musculus OX=10090 GN=Phb PE=1 SV=1	14	11	9	3082.32	3199.39	3174.08	2649.93	2770.91	2524.44	2587.94	2327.5	2475.97	2478.94	2501.32	2624.64	3151.52	2646.51	2461.48	2534.17	1.28034	0.000265917	0.00573988	3
O09111	NADH dehydrogenase [ubiquinone] 1 beta subcomplex subunit 11, mitochondrial OS=Mus musculus OX=10090 GN=Ndufb11 PE=1 SV=2	1	1	1	79.9681	74.7889	80.9361	78.2565	83.183	75.5454	64.0697	61.9199	69.4241	83.1894	85.5919	79.5781	78.5173	78.9322	65.0625	82.7494	1.27184	0.00117595	0.013209	3
Q61543	Golgi apparatus protein 1 OS=Mus musculus OX=10090 GN=Glg1 PE=1 SV=1	8	10	8	1505.7	1516.64	1606.65	1420.28	1455.27	1321.56	1312.53	1235.12	1237.42	1529.35	1560.82	1602.22	1542.34	1397.88	1261.18	1563.84	1.23998	0.00033608	0.00654299	3
Q91V98	Endosialin OS=Mus musculus OX=10090 GN=Cd248 PE=1 SV=1	1	3	1	328.805	365.347	353.051	277.793	275.857	301.686	274.086	220.973	259.84	352.935	371.441	319.042	348.734	284.875	250.598	347.118	1.39161	0.00190707	0.0172446	3
P23927	Alpha-crystallin B chain OS=Mus musculus OX=10090 GN=Cryab PE=1 SV=2	4	6	6	1079.5	1012.79	967.306	767.104	872.389	890.621	828.585	767.65	764.118	917.804	940.169	970.951	1018.83	841.561	786.237	942.724	1.29583	0.00198387	0.0175923	3
Q9CRB9	MICOS complex subunit Mic19 OS=Mus musculus OX=10090 GN=Chchd3 PE=1 SV=1	3	5	4	765.768	782.38	724.352	687.783	634.654	661.484	481.678	485.054	519.482	641.319	674.461	671.23	757.103	660.951	495.115	662.167	1.52915	5.10578e-06	0.000556174	3
Q00993	Tyrosine-protein kinase receptor UFO OS=Mus musculus OX=10090 GN=Axl PE=1 SV=2	6	3	8	535.169	500.238	502.589	410.411	432.814	411.727	393.845	385.948	437.82	525.447	545.873	512.736	512.421	418.193	405.244	527.843	1.30253	0.000132689	0.00363458	3
Q62470	Integrin alpha-3 OS=Mus musculus OX=10090 GN=Itga3 PE=1 SV=1	6	15	12	1593.14	1512.41	1480.36	1372.21	1428.87	1418.11	1230.29	1335.57	1309.77	1617.26	1536.06	1604.66	1527.9	1406.18	1291.09	1585.59	1.2281	0.000303896	0.00624319	3
Q02257	Junction plakoglobin OS=Mus musculus OX=10090 GN=Jup PE=1 SV=3	9	8	9	1484.76	1528.33	1537.56	1424.52	1438.08	1419.33	1299.42	1276.32	1190.22	1377.98	1343.94	1439.56	1516.71	1427.29	1254.43	1386.6	1.20908	0.000444401	0.00746083	3
P14824	Annexin A6 OS=Mus musculus OX=10090 GN=Anxa6 PE=1 SV=3	3	2	1	119.38	129.602	130.022	119.219	111.576	101.172	105.785	95.6461	94.9383	110.518	118.079	128.77	126.237	110.406	98.6684	118.889	1.27941	0.0114852	0.0517659	3
Q9EP72	ER membrane protein complex subunit 7 OS=Mus musculus OX=10090 GN=Emc7 PE=1 SV=1	3	4	1	391.553	372.996	415.818	337.415	385.315	319.192	332.541	308.798	312.915	372.253	366.655	385.838	393.067	346.214	317.918	374.829	1.23638	0.0118777	0.0529355	3
Q9D1C1	Ubiquitin-conjugating enzyme E2 C OS=Mus musculus OX=10090 GN=Ube2c PE=1 SV=1	2	5	2	475.963	501.923	483.053	462.405	404.77	388.8	383.503	391.625	425.642	461.683	485.236	486.058	486.857	417.496	399.847	477.524	1.21761	0.00634868	0.0360451	3
Q61941	NAD(P) transhydrogenase, mitochondrial OS=Mus musculus OX=10090 GN=Nnt PE=1 SV=2	14	13	19	4555.58	4473.04	4493.33	3720.94	3964.26	3818.7	3851.18	3557.27	3685.12	3828.43	3961.55	3958.98	4507.18	3833.33	3695.91	3915.82	1.21951	0.000112388	0.0032099	3
P10605	Cathepsin B OS=Mus musculus OX=10090 GN=Ctsb PE=1 SV=2	10	12	14	3036.83	3209.45	3094.3	2962.63	2958.14	2994.46	2473.59	2633.59	2646.08	3146.44	2818.31	2884.65	3112.71	2971.7	2583.21	2946.46	1.20498	0.00162083	0.0156535	3
Q6DID7	Protein wntless homolog OS=Mus musculus OX=10090 GN=Wls PE=1 SV=1	6	4	4	1351.54	1456.48	1377.96	1271.78	1303.39	1326.38	1202.06	1147.22	1128.57	1405.39	1323.68	1397.87	1394.62	1300.32	1158.87	1375.15	1.20343	0.000402282	0.00705726	3
P19783	Cytochrome c oxidase subunit 4 isoform 1, mitochondrial OS=Mus musculus OX=10090 GN=Cox4i1 PE=1 SV=2	4	5	4	1469.36	1423.75	1341.65	1258.55	1315.57	1323.51	1123.27	1085.32	1247.87	1410.11	1436.65	1348.27	1410.59	1298.89	1150.1	1397.85	1.22649	0.00279966	0.0217392	3
Q60847	Collagen alpha-1(XII) chain OS=Mus musculus OX=10090 GN=Col12a1 PE=2 SV=3	49	49	58	10226.2	8548.71	8856.57	8439.11	9607.13	8735.03	6619.23	7430.36	7959.9	8814.7	8513.01	8547.71	9182.47	8913.57	7315.46	8624.1	1.25521	0.0242269	0.0848757	3
Q9JM93	ADP-ribosylation factor-like protein 6-interacting protein 4 OS=Mus musculus OX=10090 GN=Arl6ip4 PE=1 SV=1	1	1	1	178.095	164.448	176.338	150.613	153.348	152.871	145.314	149.165	135.694	155.162	162.222	164.28	172.853	152.273	143.278	160.507	1.20642	0.00135523	0.0141064	3
P48962	ADP/ATP translocase 1 OS=Mus musculus OX=10090 GN=Slc25a4 PE=1 SV=4	18	16	12	9633.85	9576.68	9149.92	7250.21	8111.09	7248.68	7486.99	6635.31	7199.48	8348.19	8396.17	9121.15	9450.99	7525.98	7098.34	8614.72	1.33144	0.000656433	0.00923344	3
Q61335	B-cell receptor-associated protein 31 OS=Mus musculus OX=10090 GN=Bcap31 PE=1 SV=4	21	13	14	4656.32	4701.1	5123.97	4596.7	4378.49	3614.07	4302.58	4011.12	3710.28	4716.29	5181.18	5823.57	4822.62	4174.35	4000.68	5220.83	1.30499	0.0278609	0.0934146	3
P18155	Bifunctional methylenetetrahydrofolate dehydrogenase/cyclohydrolase, mitochondrial OS=Mus musculus OX=10090 GN=Mthfd2 PE=1 SV=1	7	5	6	1281.35	1386.37	1348.61	1129.05	1155.73	1085.01	1126.48	1056.38	1117.81	1260.28	1198.68	1245.72	1338.07	1122.88	1099.78	1234.61	1.21667	0.000336287	0.00654299	3
Q3V1T4	Prolyl 3-hydroxylase 1 OS=Mus musculus OX=10090 GN=P3h1 PE=1 SV=2	2	5	4	638.779	679.564	656.873	677.042	678.717	645.595	550.841	537.071	522.653	652.641	623.951	694.182	658.195	666.942	536.732	656.296	1.2426	0.00022244	0.00514075	3
Q9EPL2	Calsyntenin-1 OS=Mus musculus OX=10090 GN=Clstn1 PE=1 SV=1	6	6	5	775.143	743.198	742.967	680.523	718.647	682.066	639.152	561.105	663.634	749.954	821.822	756.104	753.619	693.524	619.715	775.291	1.25104	0.00412546	0.0276843	3
Q9D0M3	Cytochrome c1, heme protein, mitochondrial OS=Mus musculus OX=10090 GN=Cyc1 PE=1 SV=1	3	3	4	593.576	570.956	534.275	479.386	522.156	462.946	431.766	408.996	496.165	520.464	523.084	531.807	565.737	487.535	444.152	525.096	1.27375	0.00966921	0.0464519	3
Q8BU33	Acetolactate synthase-like protein OS=Mus musculus OX=10090 GN=Ilvbl PE=1 SV=1	5	3	3	243.846	216.695	217.112	194.71	190.492	209.075	169.825	186.683	163.633	198.582	213.093	217.143	225.536	197.935	173.111	209.452	1.30284	0.00338602	0.0243253	3
P18406	Protein CYR61 OS=Mus musculus OX=10090 GN=Cyr61 PE=1 SV=1	2	3	3	314.374	271.726	298.317	69.5097	91.6589	73.5393	55.2579	69.9241	72.6613	122.721	128.553	117.345	294.274	77.6688	65.48	122.788	4.4941	8.43125e-07	0.000225547	3
Q91YR7	Pre-mRNA-processing factor 6 OS=Mus musculus OX=10090 GN=Prpf6 PE=1 SV=1	4	4	6	634.518	628.309	629.783	569.479	552.978	519.144	560.517	514.195	482.37	542.5	611.533	675.718	630.864	546.795	518.043	607.475	1.21778	0.0306405	0.0985712	3
Q9D710	Thioredoxin-related transmembrane protein 2 OS=Mus musculus OX=10090 GN=Tmx2 PE=1 SV=1	2	2	4	363.799	359.082	349.873	313.369	320.477	290.97	282.456	295.098	308.104	370.363	355.33	381.041	357.538	308.012	295.033	368.76	1.24989	0.000245572	0.00550362	3
O88531	Palmitoyl-protein thioesterase 1 OS=Mus musculus OX=10090 GN=Ppt1 PE=1 SV=2	3	6	7	891.76	907.054	892.695	963.374	933.167	923.587	751.75	765.436	821.491	975.787	977.015	944.898	897.142	939.891	778.984	965.785	1.2398	5.97559e-05	0.0022214	3
F8VQ29	IQ motif-containing GTPase-activating protein 3 OS=Mus musculus OX=10090 GN=Iqgap3 PE=1 SV=1	5	5	8	495.354	474.118	459.71	450.96	434.498	419.558	338.507	360.861	387.965	435.855	451.2	453.444	476.17	434.816	361.882	446.764	1.31582	0.000362191	0.00678108	3
Q9D3B1	Very-long-chain (3R)-3-hydroxyacyl-CoA dehydratase 2 OS=Mus musculus OX=10090 GN=Hacd2 PE=1 SV=1	1	2	2	188.473	177.017	180.81	149.043	161.482	144.351	146.531	142.724	156.514	163.699	166.524	166.071	182.038	151.456	148.477	165.426	1.22603	0.00105281	0.0122064	3
O35465	Peptidyl-prolyl cis-trans isomerase FKBP8 OS=Mus musculus OX=10090 GN=Fkbp8 PE=1 SV=2	6	5	8	1078.44	1135.54	1098.78	1007.77	970.975	979.318	874.418	805.513	818.931	1080.56	1129.16	1144.16	1104	985.897	832.427	1117.63	1.34261	8.88249e-06	0.000756465	3
Q61753	D-3-phosphoglycerate dehydrogenase OS=Mus musculus OX=10090 GN=Phgdh PE=1 SV=3	38	37	37	17126.2	17231.3	16724.8	14718.9	14991.1	14315.2	14094.3	14064.6	14218.8	15616.3	15268.6	16296.7	17026	14672.4	14125.7	15721.5	1.20532	2.977e-05	0.00157858	3
Q3UQ28	Peroxidasin homolog OS=Mus musculus OX=10090 GN=Pxdn PE=1 SV=2	2	4	4	530.593	539.047	510.612	532.749	519.04	533.432	417.283	408.555	409.172	570.462	584.445	597.87	526.615	528.365	411.651	584.152	1.41905	1.94123e-07	0.0001131	3
O08736	Caspase-12 OS=Mus musculus OX=10090 GN=Casp12 PE=1 SV=1	1	1	3	60.1051	59.0608	59.7308	51.4177	44.2911	48.0772	48.5202	53.3042	44.5297	56.0548	59.4416	63.76	59.6307	47.8398	48.6532	59.6693	1.24727	0.00427896	0.0283216	3
Q78IK4	MICOS complex subunit Mic27 OS=Mus musculus OX=10090 GN=Apool PE=1 SV=1	1	1	1	210.187	218.768	183.025	155.74	158.635	166.331	180.843	151.148	171.38	200.625	218.845	226.659	203.407	160.173	167.323	215.096	1.34289	0.0030902	0.0231116	3
P07742	Ribonucleoside-diphosphate reductase large subunit OS=Mus musculus OX=10090 GN=Rrm1 PE=1 SV=2	17	16	15	2372.54	2534.8	2608.42	2560.9	2529.2	2279.41	2066.83	1994.1	2116.75	2660.05	2602.2	2655.73	2503.29	2453.2	2058.61	2639.19	1.28203	0.000581355	0.00867218	3
O08573	Galectin-9 OS=Mus musculus OX=10090 GN=Lgals9 PE=1 SV=1	1	1	3	207.989	197.35	213.074	196.903	199.676	186.875	128.908	169.153	161.504	214.147	181.767	186.494	206.033	194.406	152.142	193.626	1.35422	0.0132538	0.0571647	3
Q8BXQ2	GPI transamidase component PIG-T OS=Mus musculus OX=10090 GN=Pigt PE=1 SV=2	2	2	3	455.123	442.37	439.693	368.662	394.371	390.569	364.338	368.592	366.687	454.717	437.506	445.891	445.678	384.365	366.535	445.983	1.21675	8.28605e-06	0.000737414	3
P58044	Isopentenyl-diphosphate Delta-isomerase 1 OS=Mus musculus OX=10090 GN=Idi1 PE=1 SV=1	9	10	6	1830.06	1810.18	1683.9	1522.07	1652.71	1694.74	1323.77	1418.66	1459.95	1931.9	1726.25	1769.22	1773.51	1621.48	1399.62	1806.99	1.29106	0.00133869	0.0140705	3
Q9R0P9	Ubiquitin carboxyl-terminal hydrolase isozyme L1 OS=Mus musculus OX=10090 GN=Uchl1 PE=1 SV=1	4	4	4	986.745	1005.71	1000.58	891.242	898.155	896.263	806.44	843.406	808.541	985.989	923.145	965.034	997.645	895.215	819.289	957.697	1.2177	1.92618e-05	0.00131333	3
Q9CRA4	Methylsterol monooxygenase 1 OS=Mus musculus OX=10090 GN=Msmo1 PE=1 SV=1	1	1	2	766.787	717.732	720.618	775.907	830.708	751.748	580.644	556.412	614.677	651.458	669.945	687.754	734.707	785.435	583.424	669.555	1.34625	0.000142852	0.00380181	3
Q9CQN1	Heat shock protein 75 kDa, mitochondrial OS=Mus musculus OX=10090 GN=Trap1 PE=1 SV=1	22	29	28	4697.65	4998.19	4847.25	4454.36	4382.54	4340.35	4018.7	3821.85	4016.13	4598.07	4566.22	4565.05	4846.14	4392.17	3951.14	4576.42	1.22652	2.35549e-05	0.00143287	3
Q9Z0R9	Fatty acid desaturase 2 OS=Mus musculus OX=10090 GN=Fads2 PE=1 SV=1	4	3	5	774.573	841.366	670.911	518.171	375.591	492.216	353.143	374.827	413.179	669.581	723.685	739.162	758.993	457.56	379.583	710.173	1.99955	0.000172915	0.00430815	3
Q9QYC7	Vitamin K-dependent gamma-carboxylase OS=Mus musculus OX=10090 GN=Ggcx PE=1 SV=1	2	3	4	403.001	421.887	414.327	406.483	399.145	402.276	345.669	339.329	332.398	452.78	447.571	458.93	412.998	402.623	339.089	453.07	1.33614	2.17314e-07	0.0001131	3
O35405	Phospholipase D3 OS=Mus musculus OX=10090 GN=Pld3 PE=1 SV=1	3	4	6	636.91	656.117	687.708	641.41	613.482	613.397	484.678	511.308	490.569	755.989	738.08	727.314	659.915	622.625	495.388	740.367	1.49452	9.90445e-07	0.000225547	3
Q62356	Follistatin-related protein 1 OS=Mus musculus OX=10090 GN=Fstl1 PE=1 SV=2	5	4	4	1292.25	1302.96	1230.36	1047.13	1022.63	1111.41	767.102	795.08	804.234	1392.82	1378.62	1353.28	1274.78	1059.74	788.646	1374.81	1.74326	6.95388e-08	8.143e-05	3
Q64364	Tumor suppressor ARF OS=Mus musculus OX=10090 GN=Cdkn2a PE=1 SV=1	5	4	3	391.308	368.605	370.33	349.427	398.411	386.282	293.808	301.58	318.123	412.756	378.703	372.564	376.608	377.454	304.336	387.612	1.27363	0.00134654	0.0140786	3
A0A0R4J2C1	Amyloid-beta A4 precursor protein-binding family B member 1 OS=Mus musculus OX=10090 GN=Apbb1 PE=1 SV=1	1	2	1	35.8715	35.0687	23.4701	28.3051	27.9398	34.1517	21.5813	19.6299	20.9794	26.7059	29.8254	33.8626	30.9073	30.0031	20.714	29.9897	1.4921	0.0299108	0.0968682	3
P51881	ADP/ATP translocase 2 OS=Mus musculus OX=10090 GN=Slc25a5 PE=1 SV=3	7	7	16	7626.37	7437.22	7211.61	5500.37	6186.38	5414.56	5458.25	4995.65	5398.95	6263.58	6229.31	6823.45	7423.13	5690.24	5280.21	6433.13	1.40584	0.000229324	0.00523978	3
Q9CYN9	Renin receptor OS=Mus musculus OX=10090 GN=Atp6ap2 PE=1 SV=2	1	2	3	113.573	111.647	109.636	77.0107	100.608	93.1112	89.9277	88.6043	84.5702	120.915	100.567	114.109	111.607	89.6869	87.6709	111.537	1.27302	0.0112415	0.0508746	3
E9Q616	AHNAK nucleoprotein (desmoyokin) OS=Mus musculus OX=10090 GN=Ahnak PE=1 SV=1	199	191	223	55556.2	59834.5	58289.6	52400.3	50576.2	49978.1	48904.9	44851.5	46824.6	62195.2	63794.4	63964.3	57866.2	50974.5	46831.1	63312.9	1.35194	1.38726e-05	0.00105215	3
Q8BU14	Translocation protein SEC62 OS=Mus musculus OX=10090 GN=Sec62 PE=1 SV=1	1	5	5	726.009	596.506	651.669	469.703	629.634	565.87	463.837	527.295	510.856	675.69	581.803	606.844	655.936	551.073	499.926	620.203	1.31207	0.0461791	0.12999	3
P70180	Atrial natriuretic peptide receptor 3 OS=Mus musculus OX=10090 GN=Npr3 PE=1 SV=3	17	13	9	2915.2	2883.16	2946.18	2707.61	2726.1	2675.27	2383.05	2475.32	2523.5	3088.16	3009.43	2949.06	2914.73	2702.91	2459.93	3015.02	1.22565	7.20921e-06	0.000703499	3
P35441	Thrombospondin-1 OS=Mus musculus OX=10090 GN=Thbs1 PE=1 SV=1	9	18	18	2618.05	2801.86	2764.78	1912.84	1792.4	1888.22	1530.39	1559.08	1499.02	2723.83	2631.77	2633.08	2727.06	1863.75	1529.3	2662.55	1.78321	1.61635e-08	3.7855e-05	3
Q6P5F6	Zinc transporter ZIP10 OS=Mus musculus OX=10090 GN=Slc39a10 PE=1 SV=1	1	2	1	166.719	145.686	143.416	125.358	128.787	138.558	119.877	125.978	129.883	128.626	140.127	128.721	151.589	130.783	125.178	132.383	1.21099	0.018885	0.0723874	3
Q00493	Carboxypeptidase E OS=Mus musculus OX=10090 GN=Cpe PE=1 SV=2	4	4	2	771.482	810.772	856.249	671.507	681.714	636.442	631.012	532.981	472.073	859.514	908.048	968.751	812.097	662.934	541.484	911.013	1.68244	0.000327143	0.00652059	3
P53690	Matrix metalloproteinase-14 OS=Mus musculus OX=10090 GN=Mmp14 PE=2 SV=3	1	3	2	676.906	627.598	612.13	522.783	562.825	559.074	481.722	512.908	522.898	627.506	605.586	614.814	638.289	547.925	505.535	615.903	1.2626	0.000376455	0.00691497	3
Q61112	45 kDa calcium-binding protein OS=Mus musculus OX=10090 GN=Sdf4 PE=1 SV=1	5	5	8	1197.7	1219.41	1206.52	941.903	989.618	885.566	720.35	715.388	753.215	1232.1	1167.65	1246.76	1207.84	938.062	729.46	1215.01	1.66563	3.26801e-07	0.000127561	3
P53995	Anaphase-promoting complex subunit 1 OS=Mus musculus OX=10090 GN=Anapc1 PE=1 SV=2	11	13	6	1568.85	1463.25	1436.93	1425.39	1476.22	1402.6	1157.44	1271.06	1297.92	1540.51	1481.67	1554.75	1488.6	1434.41	1240.62	1525.31	1.22948	0.00142167	0.0145395	3
Q61009	Scavenger receptor class B member 1 OS=Mus musculus OX=10090 GN=Scarb1 PE=1 SV=1	2	1	1	262.588	239.07	248.086	228.49	234.882	204.771	191.627	202.345	187.977	232.971	239.379	274.842	249.728	222.328	193.888	248.403	1.288	0.00426402	0.0282899	3
O35129	Prohibitin-2 OS=Mus musculus OX=10090 GN=Phb2 PE=1 SV=1	9	12	9	2265.15	2237.64	2128.89	1817.11	1918.01	1706.53	1738.49	1538.49	1754.56	1644.05	1770.66	1874.81	2209.77	1811.82	1674.22	1760.63	1.31988	0.0021813	0.0183762	3
P61025	Cyclin-dependent kinases regulatory subunit 1 OS=Mus musculus OX=10090 GN=Cks1b PE=3 SV=1	2	2	2	454.407	510.846	458.116	451.575	418.046	470.651	419.653	364.775	391.213	447.435	479.404	453.091	473.773	446.222	391.24	459.768	1.21095	0.0188844	0.0723874	3
P07214	SPARC OS=Mus musculus OX=10090 GN=Sparc PE=1 SV=1	5	4	7	864.677	827.55	808.735	581.245	581.96	562.575	380.436	401.479	505.983	945.293	960.661	894.359	833.332	575.189	425.952	933.002	2.1904	8.18874e-06	0.000737414	3
Q9JM58	Cytokine receptor-like factor 1 OS=Mus musculus OX=10090 GN=Crlf1 PE=1 SV=1	2	3	2	231.349	225.413	229.578	252.353	243.788	215.297	156.92	197.292	177.8	208.113	182.242	226.06	228.766	236.602	176.566	204.671	1.34003	0.0153462	0.0628885	3
Q6P9L6	Kinesin-like protein KIF15 OS=Mus musculus OX=10090 GN=Kif15 PE=1 SV=1	7	11	10	1250.56	1247.74	1189.29	1175.69	1142.18	1160.48	953.374	1009	1039.03	1138.04	1118.74	1128.86	1228.87	1159.37	999.834	1128.52	1.22907	0.00010367	0.00308123	3
P08775	DNA-directed RNA polymerase II subunit RPB1 OS=Mus musculus OX=10090 GN=Polr2a PE=1 SV=3	2	3	3	294.59	277.867	308.458	253.454	269.756	249.344	290.734	284.651	236.866	300.861	307.365	344.971	293.371	257.369	269.632	317.152	1.23228	0.0387027	0.115615	4
Q99PL5	Ribosome-binding protein 1 OS=Mus musculus OX=10090 GN=Rrbp1 PE=1 SV=2	33	28	34	6545.76	5549.77	5763.77	5747.94	6713.45	6161.41	5682.18	5796.52	6042.24	7478.63	7394.76	7487.09	5938.1	6195.07	5838.39	7453.38	1.27661	0.00392827	0.0268074	4
Q8BGD5	Carnitine O-palmitoyltransferase 1, brain isoform OS=Mus musculus OX=10090 GN=Cpt1c PE=1 SV=1	2	3	2	105.553	118.488	112.325	106.965	107.038	119.475	105.487	87.2332	104.851	133.383	138.628	114.737	111.997	111.007	98.8138	128.495	1.30037	0.0343172	0.10603	4
P01887	Beta-2-microglobulin OS=Mus musculus OX=10090 GN=B2m PE=1 SV=2	2	2	2	896.754	895.905	914.969	883.601	877.867	888.778	747.827	797.774	788.19	1101.77	1058.4	1038.01	902.5	883.404	777.626	1065.73	1.37049	1.81998e-06	0.000293958	4
Q62009	Periostin OS=Mus musculus OX=10090 GN=Postn PE=1 SV=2	18	20	24	2946.19	2670	2669.39	2315.15	2494.03	2505.68	2050.51	2218.09	2356.35	3390.96	3320.69	3171.4	2758.85	2436.7	2204.76	3293.07	1.49362	8.42667e-05	0.00277399	4
Q9QYH6	Melanoma-associated antigen D1 OS=Mus musculus OX=10090 GN=Maged1 PE=1 SV=1	2	2	5	339.15	366.714	357.667	350.913	360.695	359.616	350.131	282.572	308.595	362.949	393.162	377.265	354.323	357.048	312.547	377.59	1.20811	0.029309	0.0955347	4
Q9CWL8	Beta-catenin-like protein 1 OS=Mus musculus OX=10090 GN=Ctnnbl1 PE=1 SV=1	3	4	3	233.58	240.563	219.83	186.591	203.038	218.38	193.766	197.656	235.918	294.713	267.393	234.522	231.162	202.252	208.281	264.389	1.30722	0.0262816	0.0900338	4
Q9WV02	RNA-binding motif protein, X chromosome OS=Mus musculus OX=10090 GN=Rbmx PE=1 SV=1	3	2	1	152.674	145.756	150.498	144.112	148.645	172.896	167.622	159.439	155.599	183.981	194.549	169.396	149.615	154.719	160.809	182.348	1.21879	0.0241278	0.0848129	4
A6X935	Inter alpha-trypsin inhibitor, heavy chain 4 OS=Mus musculus OX=10090 GN=Itih4 PE=1 SV=2	1	1	5	549.319	454.136	507.453	446.717	521.993	416.846	444.006	475.874	489.771	564.211	552.249	590.184	502.114	459.788	469.488	568.663	1.23679	0.0459659	0.129701	4
Q99020	Heterogeneous nuclear ribonucleoprotein A/B OS=Mus musculus OX=10090 GN=Hnrnpab PE=1 SV=1	11	10	9	2858.75	2648.16	2596.89	2779.21	2925.47	2794.46	3088.48	3112.83	3088.36	3208.43	3248.42	3455.17	2698.93	2832.29	3096.54	3302.26	1.22355	0.000477395	0.00768425	4
P49769	Presenilin-1 OS=Mus musculus OX=10090 GN=Psen1 PE=1 SV=1	1	1	1	99.1503	83.4448	87.9887	69.9354	70.026	84.6833	89.8055	103.126	85.1409	93.6804	95.9748	94.7587	89.958	74.5735	92.3854	94.8	1.27123	0.034162	0.10569	4
P14733	Lamin-B1 OS=Mus musculus OX=10090 GN=Lmnb1 PE=1 SV=3	1	6	4	496.949	521.673	499.676	463.636	498.313	564.274	637.199	577.75	589.459	654.728	654.777	599.103	505.979	507.057	600.929	635.651	1.25628	0.0039407	0.0268288	4
Q8VEK3	Heterogeneous nuclear ribonucleoprotein U OS=Mus musculus OX=10090 GN=Hnrnpu PE=1 SV=1	14	9	19	2688.36	2645.62	2607.59	2698.62	2929.79	2812.22	3058.91	2937.61	2974.99	3371.09	3303.96	3422.19	2646.98	2811.96	2990.07	3365.4	1.27141	1.93466e-05	0.00131333	4
H3BL37	Treacle protein OS=Mus musculus OX=10090 GN=Tcof1 PE=1 SV=1	3	4	3	567.438	537.988	532.692	492.291	506.514	524.469	473.074	471.51	480.576	594.946	611.736	590.011	545.828	507.588	475.037	598.826	1.26059	2.32078e-05	0.00143287	4
Q8BTJ4	Bis(5'-adenosyl)-triphosphatase enpp4 OS=Mus musculus OX=10090 GN=Enpp4 PE=1 SV=1	2	2	2	59.823	64.321	68.487	63.3749	66.0394	73.2072	57.865	57.0279	61.9673	87.1109	80.7855	64.5124	64.1125	67.4153	58.9145	76.8569	1.30455	0.0498581	0.136876	4
Q80WB5	Protein N-terminal glutamine amidohydrolase OS=Mus musculus OX=10090 GN=Wdyhv1 PE=1 SV=1	1	1	1	42.7124	39.7154	37.0331	27.3239	28.1687	32.5533	30.8062	37.8407	33.1784	43.7171	38.8348	41.7948	39.7528	29.2618	33.8182	41.3998	1.41481	0.00351725	0.0248864	4
Q7TPV4	Myb-binding protein 1A OS=Mus musculus OX=10090 GN=Mybbp1a PE=1 SV=2	5	5	5	398.222	367.189	347.534	299.217	354.228	344.677	358.173	397.439	397.162	478.885	415.64	445.123	370.4	331.813	383.805	445.803	1.34353	0.00770534	0.0405538	4
Q80Y55	BSD domain-containing protein 1 OS=Mus musculus OX=10090 GN=Bsdc1 PE=1 SV=1	4	4	1	135.782	132.602	138.882	112.959	119.521	97.0684	117.032	118.295	136.027	130.882	126.238	124.677	135.731	109.433	123.49	127.239	1.24031	0.0315259	0.0999101	4
Q8BQY8	Checkpoint protein HUS1 OS=Mus musculus OX=10090 GN=Hus1 PE=2 SV=1	2	1	1	84.4417	81.1191	86.1552	80.2582	69.0625	72.1163	80.0419	80.6115	77.5792	92.662	106.611	101.553	83.8791	73.664	79.3999	100.107	1.35897	0.000870546	0.0107589	4
Q6PGG6	Guanine nucleotide-binding protein-like 3-like protein OS=Mus musculus OX=10090 GN=Gnl3l PE=1 SV=1	2	1	2	109.168	81.5263	88.7547	70.1338	86.9372	69.8605	62.0032	79.6596	84.5466	108.691	101.873	106.834	92.4403	75.241	74.7451	105.76	1.41494	0.0283441	0.0941928	4
Q91VC3	Eukaryotic initiation factor 4A-III OS=Mus musculus OX=10090 GN=Eif4a3 PE=1 SV=3	7	6	5	1189.8	1176.77	1195.2	1063.02	1084.62	1059.24	1162.81	1178.32	1166.28	1333.27	1309.18	1328.16	1187.23	1068.9	1169.12	1323.5	1.23818	3.01002e-08	4.69965e-05	4
Q61823	Programmed cell death protein 4 OS=Mus musculus OX=10090 GN=Pdcd4 PE=1 SV=1	7	3	6	1113.45	1351.41	1201.41	464.762	589.281	688.191	479.871	512.436	697.92	2806.1	2411.06	2276.66	1218.19	573.351	555.721	2488.11	4.47726	7.53058e-06	0.000719862	4
O35613	Death domain-associated protein 6 OS=Mus musculus OX=10090 GN=Daxx PE=1 SV=1	1	2	2	70.4348	67.2981	66.6	52.5183	74.6941	77.1678	100.4	83.8137	82.3927	87.1478	84.6952	84.3406	68.0907	67.1446	88.5073	85.3855	1.31816	0.0426305	0.122732	4
Q60932	Voltage-dependent anion-selective channel protein 1 OS=Mus musculus OX=10090 GN=Vdac1 PE=1 SV=3	8	10	8	1896.86	1820.4	1723.27	1547.78	1766.49	1762.7	1597.03	1643.47	1771.93	2207.2	2018.51	1990.97	1812.11	1689.14	1669.19	2070.04	1.24014	0.00762555	0.0404508	4
A0A0G2JG52	Crystallin beta-gamma domain-containing 1 OS=Mus musculus OX=10090 GN=Crybg1 PE=1 SV=1	4	4	5	363.131	395.294	363.155	350.725	375.531	345.73	354.708	304.316	359.885	409.396	402.82	409.19	373.558	357.094	338.678	407.124	1.2021	0.0231585	0.0826158	4
Q9Z0F8	Disintegrin and metalloproteinase domain-containing protein 17 OS=Mus musculus OX=10090 GN=Adam17 PE=1 SV=3	1	1	4	118.207	146.059	131.233	98.1357	99.2941	117.717	116.41	117.743	110.506	158.901	128.558	132.198	131.342	104.68	114.842	139.257	1.33032	0.0233267	0.0830259	4
P60867	40S ribosomal protein S20 OS=Mus musculus OX=10090 GN=Rps20 PE=1 SV=1	3	3	4	628.455	557.321	627.607	594.57	637.054	612.861	647.477	678.286	663.459	738.761	736.6	705.335	603.517	614.583	662.954	726.737	1.20417	0.00248911	0.0200093	4
Q8BP71	RNA binding protein fox-1 homolog 2 OS=Mus musculus OX=10090 GN=Rbfox2 PE=1 SV=2	1	2	2	224.055	192.126	206.088	187.372	188.654	202.688	199.058	194.001	201.886	243.261	278.965	243.085	207.013	192.782	198.288	254.562	1.32047	0.00187105	0.0170409	4
Q8BG81	Polymerase delta-interacting protein 3 OS=Mus musculus OX=10090 GN=Poldip3 PE=1 SV=1	1	1	2	50.4223	44.7605	40.6371	40.894	47.1086	51.8306	66.2019	58.6308	61.7361	56.4888	63.507	59.8031	45.0969	46.3926	62.1124	59.8645	1.37731	0.00420347	0.0279674	4
Q61937	Nucleophosmin OS=Mus musculus OX=10090 GN=Npm1 PE=1 SV=1	11	11	14	2083.68	1930.6	1921.57	1723.3	1845.22	1784.53	1975.94	2156.33	2155.21	2421.56	2272.33	2343.17	1977.24	1783.65	2094.08	2344.9	1.31466	0.000271322	0.00578214	4
H3BKQ3	Ecotropic viral integration site 5-like OS=Mus musculus OX=10090 GN=Evi5l PE=1 SV=1	1	2	2	115.865	92.8192	98.1807	73.7495	93.1872	77.1145	79.4947	91.756	89.9727	104.857	96.2039	108.698	101.829	80.9252	86.9016	103.119	1.27425	0.0411706	0.119822	4
Q61398	Procollagen C-endopeptidase enhancer 1 OS=Mus musculus OX=10090 GN=Pcolce PE=1 SV=2	10	7	7	1172.12	1143.3	1206.82	1135.91	1180.37	1171.85	913.914	1042	1055.11	1588.89	1445.17	1377.06	1173.8	1162.55	1001.59	1467.76	1.46543	0.000262065	0.00570937	4
Q6NVF9	Cleavage and polyadenylation specificity factor subunit 6 OS=Mus musculus OX=10090 GN=Cpsf6 PE=1 SV=1	4	4	5	442.851	369.518	395.249	352.488	415.126	352.399	375.73	413.531	405.534	473.724	446.618	491.611	401.41	372.208	397.927	470.285	1.2635	0.0262951	0.0900338	4
Q9CWU4	UPF0690 protein C1orf52 homolog OS=Mus musculus OX=10090 PE=1 SV=1	2	1	2	208.798	249.85	182.603	117.838	80.8844	121.172	183.361	211.743	183.65	126.62	94.1394	149.191	211.985	104.918	192.472	121.154	2.02048	0.00392836	0.0268074	4
Q59IW6	ABI gene family, member 3 (NESH)-binding protein OS=Mus musculus OX=10090 GN=Abi3bp PE=1 SV=1	6	6	6	691.818	620.781	659.101	641.391	626.258	674.349	551.289	637.756	556.72	795.105	794.808	789.433	656.59	647.024	580.618	793.111	1.36598	0.000612058	0.00895899	4
P21460	Cystatin-C OS=Mus musculus OX=10090 GN=Cst3 PE=1 SV=2	6	5	6	1026.69	1019.03	1017.13	935.664	910.57	905.425	826.92	841.351	848.547	1227.37	1245.68	1245.54	1020.94	917.125	838.891	1239.5	1.47755	1.03683e-09	4.85652e-06	4
Q91WK7	Ankyrin repeat domain-containing protein 54 OS=Mus musculus OX=10090 GN=Ankrd54 PE=1 SV=1	1	1	1	137.948	133.098	132.515	111.449	106.361	117.858	118.432	115.277	121.409	146.625	159.718	142.671	134.498	111.791	118.346	149.497	1.3373	0.000134265	0.00365639	4
Q9Z255	Ubiquitin-conjugating enzyme E2 A OS=Mus musculus OX=10090 GN=Ube2a PE=1 SV=1	3	1	2	370.43	386.154	374.622	358.323	356.279	349.243	305.861	334.219	338.692	455.193	413.155	427.25	377.01	354.593	325.927	431.516	1.32397	0.00014854	0.00386097	4
Q505D7	Optic atrophy 3 protein homolog OS=Mus musculus OX=10090 GN=Opa3 PE=1 SV=1	1	1	1	181.542	177.908	185.32	165.113	165.757	130.134	166.013	170.782	184.447	187.936	186.157	200.703	181.565	152.715	173.574	191.491	1.25391	0.037117	0.112343	4
O08919	Numb-like protein OS=Mus musculus OX=10090 GN=Numbl PE=1 SV=3	1	2	2	252.805	262.277	269.337	129.284	178.613	162.111	391.352	317.551	305.435	155.188	170.186	191.744	261.385	155.271	336.073	171.725	2.16443	0.000149272	0.00386097	4
Q9Z2B9	Ribosomal protein S6 kinase alpha-4 OS=Mus musculus OX=10090 GN=Rps6ka4 PE=1 SV=2	2	7	4	224.99	229.708	223.942	218.578	215.637	224.596	185.464	219.619	218.819	279.127	243.194	240.801	226.199	219.572	207.334	253.788	1.22405	0.0279319	0.0935191	4
O35945	Aldehyde dehydrogenase, cytosolic 1 OS=Mus musculus OX=10090 GN=Aldh1a7 PE=1 SV=1	11	11	16	1988.2	2050.22	2061.47	2023.05	1995.58	1975.96	1923.56	1911.82	1922.66	1932.32	1909.52	1907.05	2033.04	1998.11	1919.34	1916.26	1.06094	0.000654978	0.00923344
Q9CQF3	Cleavage and polyadenylation specificity factor subunit 5 OS=Mus musculus OX=10090 GN=Nudt21 PE=1 SV=1	4	2	1	433.75	318.674	387.708	357.735	438.034	377.086	357.908	379.909	417.349	417.123	429.898	384.372	377.02	389.496	384.282	410.009	1.0875	0.793273	0.842369
Q8K330	Protein phosphatase Slingshot homolog 3 OS=Mus musculus OX=10090 GN=Ssh3 PE=1 SV=1		1			227.21			223.221			214.291			229.966		227.21	223.221	214.291	229.966	1.07315
O88522	NF-kappa-B essential modulator OS=Mus musculus OX=10090 GN=Ikbkg PE=1 SV=2	5	4	2	631.855	646.159	583.972	656.444	612.942	587.615	659.379	612.881	689.944	581.322	657.019	667.468	620.083	618.353	653.293	634.076	1.05651	0.686544	0.758437
P27601	Guanine nucleotide-binding protein subunit alpha-13 OS=Mus musculus OX=10090 GN=Gna13 PE=1 SV=1	5	6	7	696.291	726.979	653.485	636.404	602.76	668.93	620.171	615.544	570.751	662.15	669.732	721.85	691.591	635.457	601.736	684.071	1.14933	0.0276671	0.0931533
Q9R0M6	Ras-related protein Rab-9A OS=Mus musculus OX=10090 GN=Rab9a PE=1 SV=1	6	8	6	1303.05	1295.83	1341.44	1249.73	1294.26	1294.61	1244.84	1232.65	1194.57	1349.56	1324.44	1316.56	1313.29	1279.36	1223.83	1330.11	1.08684	0.0026892	0.0212415
Q8BK03	Mitoguardin 2 OS=Mus musculus OX=10090 GN=Miga2 PE=1 SV=1	1	1	1	21.5359	24.3525	25.8238	25.4741	19.1242	17.181	24.5199	26.7195	31.5139	23.1761	24.5098	20.1873	23.8365	20.3038	27.4336	22.5503	1.35116	0.13607	0.257966
Q91Z50	Flap endonuclease 1 OS=Mus musculus OX=10090 GN=Fen1 PE=1 SV=1	7	8	13	1458.26	1359.52	1330.3	1226.36	1278.53	1341.03	1238.1	1265.55	1366.88	1514.52	1533.63	1399.01	1381.63	1281.12	1289.01	1481.17	1.15616	0.0202116	0.0754927
A2AJ15	Endoplasmic reticulum mannosyl-oligosaccharide 1,2-alpha-mannosidase OS=Mus musculus OX=10090 GN=Man1b1 PE=1 SV=1	2	2	4	471.301	465.534	447.479	463.172	462.31	466.609	433.239	455.432	479.547	457.281	441.717	431.359	461.325	464.026	455.681	443.325	1.0467	0.37776	0.50932
Q921L5	Conserved oligomeric Golgi complex subunit 2 OS=Mus musculus OX=10090 GN=Cog2 PE=1 SV=2	8	6	7	697.099	753.761	719.029	766.285	719.09	732.293	730.397	744.18	735.685	716.144	692.894	722.918	722.922	738.958	736.732	710.535	1.04	0.355369	0.491598
Q8BWT1	3-ketoacyl-CoA thiolase, mitochondrial OS=Mus musculus OX=10090 GN=Acaa2 PE=1 SV=3	22	22	22	3444.61	3536.35	3484.3	3839.37	3639.73	3854.63	3741.11	3827.76	3824.51	3594.93	3616.18	3456.58	3488.22	3776.63	3797.58	3555.19	1.08869	0.00316106	0.0233422
P62264	40S ribosomal protein S14 OS=Mus musculus OX=10090 GN=Rps14 PE=1 SV=3	5	8	6	1322.71	1290.69	1272.48	1206.27	1366.26	1331.62	1424.9	1393.78	1473.67	1501.71	1404.86	1377.82	1295.12	1299.53	1430.41	1427.16	1.10446	0.0313552	0.0997064
Q8BTW9	Serine/threonine-protein kinase PAK 4 OS=Mus musculus OX=10090 GN=Pak4 PE=1 SV=1	3	5	3	478.667	461.768	443.169	471.967	504.417	453.501	473.306	468.338	525.355	490.246	479.663	492.161	460.973	476.168	488.335	487.326	1.05936	0.439116	0.561358
Q9D9V3	Ethylmalonyl-CoA decarboxylase OS=Mus musculus OX=10090 GN=Echdc1 PE=1 SV=2	11	10	12	1735.58	1735.26	1708.35	1748.14	1694.12	1757.38	1635.54	1681.1	1687.23	1717.02	1725.81	1683.32	1726.35	1732.99	1667.8	1708.62	1.03909	0.0580694	0.150858
Q8VDW0	ATP-dependent RNA helicase DDX39A OS=Mus musculus OX=10090 GN=Ddx39a PE=1 SV=1	2	3	8	748.457	716.014	682.016	718.249	753.516	673.649	685.758	654.743	732.484	731.961	760.151	796.275	714.981	714.387	690.261	762.343	1.10443	0.191814	0.325575
Q9JLI8	Squamous cell carcinoma antigen recognized by T-cells 3 OS=Mus musculus OX=10090 GN=Sart3 PE=1 SV=1	17	16	16	2550.12	2530.3	2483.34	2527.84	2557.45	2569.5	2621.62	2719.24	2635.75	2699.7	2592.29	2710.69	2521.1	2551.54	2658.53	2667.02	1.05788	0.00929241	0.0451511
P70452	Syntaxin-4 OS=Mus musculus OX=10090 GN=Stx4 PE=1 SV=1	3	4	5	726.974	697.598	726.928	702.801	729.195	715.428	687.112	728.948	690.091	713.811	674.957	698.252	717.032	715.727	701.795	695.489	1.03097	0.455547	0.575143
Q9Z2C4	Myotubularin-related protein 1 OS=Mus musculus OX=10090 GN=Mtmr1 PE=1 SV=1	3	2	3	222.351	208.836	213.827	179.174	216.624	215.579	234.295	227.181	222.389	214.871	198.051	198.897	214.933	203.016	227.902	203.795	1.12259	0.155874	0.28321
Q80TY0	Formin-binding protein 1 OS=Mus musculus OX=10090 GN=Fnbp1 PE=1 SV=2	5	6	2	1236.63	1240.78	1186.46	1262.03	1219.22	1275.7	1217.21	1264.6	1265.79	1186.65	1177.92	1174.57	1221.04	1252.08	1248.99	1179.7	1.06136	0.0257793	0.0888625
P62852	40S ribosomal protein S25 OS=Mus musculus OX=10090 GN=Rps25 PE=1 SV=1	7	8	8	3773.32	3272.13	3403.64	3387.48	3962.51	3533.21	3809.11	3803.05	4029.08	3870.07	3802.3	3874.04	3476.69	3619.7	3879.01	3848.66	1.11572	0.136538	0.258507
Q80XK6	Autophagy-related protein 2 homolog B OS=Mus musculus OX=10090 GN=Atg2b PE=1 SV=3	2	4	1	67.473	67.8164	122.408	64.5032	64.0502	31.2664	65.4278	60.3236	44.6123	61.9376	67.1514	61.0547	82.4312	50.5506	56.049	63.3251	1.63067	0.263853	0.402479
Q9WTZ2	Membrane-bound transcription factor site-1 protease OS=Mus musculus OX=10090 GN=Mbtps1 PE=1 SV=1	1		2	95.9532		91.1584	92.7947		93.3678	90.6837		78.3898	83.7091		100.225	93.5251	93.0808	84.313	91.5954	1.10926	0.615604	0.702434
Q6P8X1	Sorting nexin-6 OS=Mus musculus OX=10090 GN=Snx6 PE=1 SV=2	8	18	19	2633.24	2532.25	2546.95	2691.86	2731.64	2709.89	2534.9	2726.58	2656.37	2587.39	2456.95	2534.19	2570.43	2711.08	2638.09	2525.61	1.07344	0.0390725	0.116507
Q8BMF4	Dihydrolipoyllysine-residue acetyltransferase component of pyruvate dehydrogenase complex, mitochondrial OS=Mus musculus OX=10090 GN=Dlat PE=1 SV=2	9	11	12	2111.99	2131	2172.37	2051.94	2104.38	2119.15	2264.31	2132.38	2091.49	2194.64	2255.11	2239.87	2138.31	2091.62	2161.48	2229.73	1.06603	0.0684833	0.16681
P60487	Pyridoxal phosphate phosphatase OS=Mus musculus OX=10090 GN=Pdxp PE=1 SV=1		3			85.4504			99.8798			117.38			110.047		85.4504	99.8798	117.38	110.047	1.37367
P68134	Actin, alpha skeletal muscle OS=Mus musculus OX=10090 GN=Acta1 PE=1 SV=1	2	2	2	50.3885	43.7225	49.2594	47.4597	57.2226	46.5266	49.5653	52.4778	54.1141	52.6116	46.6022	50.1249	47.6989	50.1801	52.0181	49.718	1.09055	0.621547	0.706633
A0A286YCV9	Kinesin family member 13B OS=Mus musculus OX=10090 GN=Kif13b PE=1 SV=1	9	6	6	870.913	837.877	801.621	857.202	898.644	980.511	841.779	927.688	952.53	905.522	811.206	740.753	836.324	910.698	906.066	816.396	1.11551	0.226848	0.364889
Q91YR9	Prostaglandin reductase 1 OS=Mus musculus OX=10090 GN=Ptgr1 PE=1 SV=2	9	9	13	1250.33	1324.94	1380.52	1471.14	1373.94	1395.41	1402.98	1472.12	1384.84	1343.83	1297.28	1307.51	1317.51	1412.89	1419.49	1316.05	1.0786	0.0482364	0.133886
Q80UG5	Septin-9 OS=Mus musculus OX=10090 GN=Sept9 PE=1 SV=1	15	18	23	3727.03	3385.65	3434.46	3738.65	3924.49	3985.22	3905.14	4425.77	4232.64	3873.92	3508.84	3592.43	3512.54	3881.36	4182.27	3655.12	1.19067	0.0147548	0.0612515
Q9CX34	Protein SGT1 homolog OS=Mus musculus OX=10090 GN=Sugt1 PE=1 SV=3	14	14	19	3491.57	3572.28	3687.14	3407.58	3558.33	3496.08	3280.26	3318.46	3346.28	3812.91	3543.25	3462.82	3582.77	3486.78	3314.89	3603.27	1.08699	0.03916	0.116609
Q6NZQ4	PAX-interacting protein 1 OS=Mus musculus OX=10090 GN=Paxip1 PE=1 SV=1	1	1	1	41.6633	46.5401	39.8133	35.2112	32.1587	42.7054	30.3633	36.3289	35.4982	50.3582	42.5682	39.579	42.5798	36.4323	33.9575	43.9413	1.29401	0.069347	0.168389
Q6PDQ2	Chromodomain-helicase-DNA-binding protein 4 OS=Mus musculus OX=10090 GN=Chd4 PE=1 SV=1	10	8	17	1936.38	1730.65	1813.85	1908.43	1920.56	1895.4	1951.04	1926.51	2011.62	1875.73	2093.87	1950.71	1825.02	1908.1	1962.73	1971.38	1.0802	0.164294	0.293947
Q62425	Cytochrome c oxidase subunit NDUFA4 OS=Mus musculus OX=10090 GN=Ndufa4 PE=1 SV=2	3	2	2	1235.45	1124.02	1259.64	1183.13	1320.04	1076.32	1189.13	1114.66	1097.14	1059.28	1108.26	1233.89	1204.89	1189.01	1132.95	1131.47	1.06489	0.647336	0.727649
Q921J2	GTP-binding protein Rheb OS=Mus musculus OX=10090 GN=Rheb PE=1 SV=1	4	4	7	943.853	997.22	950.239	955.95	935.906	910.542	983.616	938.258	928.642	886.696	898.732	980.692	963.48	933.947	949.873	921.112	1.046	0.504285	0.615283
Q8BH61	Coagulation factor XIII A chain OS=Mus musculus OX=10090 GN=F13a1 PE=1 SV=3		1	2		110.107	89.7115		105.621	110.193		133.742	131.059		85.397	103.903	99.3874	107.882	132.394	94.1968	1.4055	0.0953954	0.207732
Q6P1B1	Xaa-Pro aminopeptidase 1 OS=Mus musculus OX=10090 GN=Xpnpep1 PE=1 SV=1	20	1	2	418.718	437.091	472.069	485.376	436.035	442.937	468.498	443.741	449.487	437.107	492.832	445.207	442.079	454.27	453.786	457.737	1.03542	0.87283	0.900713
Q8CD76	Kinesin light chain 1 OS=Mus musculus OX=10090 GN=Klc1 PE=1 SV=1	14	13	18	3392.25	3460.18	3412.72	3479.68	3427.71	3432.47	3323.26	3326.08	3290.08	3203.25	3184.46	3263.16	3421.6	3446.54	3313.1	3216.78	1.07143	7.8419e-05	0.00268113
Q9Z2I8	Succinate--CoA ligase [GDP-forming] subunit beta, mitochondrial OS=Mus musculus OX=10090 GN=Suclg2 PE=1 SV=3	13	19	13	2725.14	2830.85	2814.38	2878.4	2736.28	2764.47	2754.42	2709.22	2629.07	2610.54	2692.15	2760.59	2789.73	2792.38	2697.07	2687.06	1.0392	0.176271	0.30785
P33610	DNA primase large subunit OS=Mus musculus OX=10090 GN=Prim2 PE=1 SV=1	6	8	6	1124.41	1115.05	1090.8	1120.98	1083.91	1101.22	1024.42	1092.95	1094.25	1164.17	1142.06	1147.71	1109.99	1101.93	1070.03	1151.28	1.07592	0.0264593	0.0903181
Q9CXW3	Calcyclin-binding protein OS=Mus musculus OX=10090 GN=Cacybp PE=1 SV=1	11	11	15	3890.08	3985.01	4030.13	4010.52	4081.38	3907.02	3949.46	3918.34	3934.41	4055.3	3920.62	4033.79	3967.98	3999	3934.05	4002.8	1.01748	0.591001	0.684701
B1AUR6	Protein MMS22-like OS=Mus musculus OX=10090 GN=Mms22l PE=1 SV=1		2	2		200.74	200.021		167.205	172.149		179.878	188.907		187.875	174.62	200.38	169.659	184.337	181.126	1.18108	0.0314745	0.0999069
Q9R0D8	WD repeat-containing protein 54 OS=Mus musculus OX=10090 GN=Wdr54 PE=1 SV=1	1	2	3	121.524	111.109	128.163	114.642	108.796	110.032	119.121	126.005	114.151	117.842	127.22	120.783	120.058	111.129	119.661	121.886	1.0968	0.183184	0.315222
Q9CRY7	Lysophospholipase D GDPD1 OS=Mus musculus OX=10090 GN=Gdpd1 PE=1 SV=1	1		1	37.9968		45.3623	44.6606		37.8563	32.9897		40.6366	41.4022		33.1941	41.5166	41.118	36.614	37.0717	1.1339	0.720333	0.785757
O88545	COP9 signalosome complex subunit 6 OS=Mus musculus OX=10090 GN=Cops6 PE=1 SV=1	6	9	8	884.348	856.867	903.934	864.553	846.923	866.149	980.536	951.658	918.199	879.184	953.172	920.339	881.504	859.164	949.789	917.064	1.10548	0.0155754	0.0636052
Q3UCV8	Ubiquitin thioesterase otulin OS=Mus musculus OX=10090 GN=Otulin PE=1 SV=1	1	2	1	162.13	160.676	173.956	157.348	184.839	164.917	191.36	188.057	154.356	148.641	125.907	166.25	165.482	168.645	177.101	145.988	1.21312	0.206746	0.34219
Q5SSW2	Proteasome activator complex subunit 4 OS=Mus musculus OX=10090 GN=Psme4 PE=1 SV=1	8	9	4	619.413	647.252	654.77	686.724	704.248	634.167	614.35	660.247	616.957	670.494	579.234	685.086	640.296	674.379	630.172	643.178	1.07015	0.557683	0.658469
P62702	40S ribosomal protein S4, X isoform OS=Mus musculus OX=10090 GN=Rps4x PE=1 SV=2	16	18	20	5314.97	4633.92	4908.11	5155.41	5821.12	5337.85	5745.36	5774.7	5912.57	5226.01	5212.01	5283.22	4944.49	5430.99	5810.42	5240.32	1.17513	0.0181378	0.0707387
Q61598	Rab GDP dissociation inhibitor beta OS=Mus musculus OX=10090 GN=Gdi2 PE=1 SV=1	45	43	40	13039.8	13592.7	13883.7	13884.3	13294.8	13678.1	13786.8	14110	13280.4	13581.8	13295.1	13450.4	13500.8	13616.9	13721.5	13441.9	1.0208	0.761177	0.81734
Q61425	Hydroxyacyl-coenzyme A dehydrogenase, mitochondrial OS=Mus musculus OX=10090 GN=Hadh PE=1 SV=2	8	9	7	872.461	874.658	894.42	978.721	975.211	1001.78	975.182	938.488	958.181	864.357	902.365	836.341	880.458	985.167	957.166	867.267	1.13594	0.000378109	0.00691821
Q6GV12	3-ketodihydrosphingosine reductase OS=Mus musculus OX=10090 GN=Kdsr PE=1 SV=1		1	2		393.693	384.235		420.595	431.448		424.806	462.384		403.869	364.896	388.935	425.987	443.197	383.888	1.15449	0.100753	0.213759
Q7TMR0	Lysosomal Pro-X carboxypeptidase OS=Mus musculus OX=10090 GN=Prcp PE=1 SV=2	4	2	2	103.221	104.823	118.043	102.418	112.574	106.449	102.716	101.058	111.455	109.375	99.275	81.7843	108.498	107.066	104.979	96.1189	1.12879	0.401759	0.530993
Q8K411	Presequence protease, mitochondrial OS=Mus musculus OX=10090 GN=Pitrm1 PE=1 SV=1	18	23	20	3576.05	3691.61	3778.9	4038.51	3899.32	3881.72	3891.98	3858.79	3801.75	3642.46	3699.28	3686.63	3681.24	3939.23	3850.66	3676.04	1.07159	0.00477295	0.0302934
Q8K212	Phosphofurin acidic cluster sorting protein 1 OS=Mus musculus OX=10090 GN=Pacs1 PE=1 SV=2	3	3	6	615.217	568.063	593.303	607.88	578.342	587.161	572.091	622.885	603.016	585.801	611.699	597.509	591.88	590.999	598.964	598.243	1.01348	0.940295	0.952702
Q9D967	Magnesium-dependent phosphatase 1 OS=Mus musculus OX=10090 GN=Mdp1 PE=1 SV=1	4	7	6	592.788	612.277	651.02	661.393	666.015	658.768	685.43	668.167	645.151	634.067	627.22	618.74	618.226	662.052	666.044	626.644	1.07735	0.0290674	0.095476
P22437	Prostaglandin G/H synthase 1 OS=Mus musculus OX=10090 GN=Ptgs1 PE=1 SV=1	7	11	10	1432.77	1535.59	1504.22	1487.33	1417.23	1483.3	1614.64	1502.3	1548.02	1438.66	1518.29	1437.86	1490.23	1462.26	1554.31	1464.46	1.06295	0.158319	0.286208
Q61704	Inter-alpha-trypsin inhibitor heavy chain H3 OS=Mus musculus OX=10090 GN=Itih3 PE=1 SV=3	3	3	3	387.886	355.378	362.702	364.794	376.342	358.93	346.804	374.951	416.678	373.086	365.899	334.26	368.396	366.618	378.402	357.343	1.05893	0.722675	0.787578
Q9WTI7	Unconventional myosin-Ic OS=Mus musculus OX=10090 GN=Myo1c PE=1 SV=2	39	43	46	9790.05	9529.77	9551.67	10490.6	10424.8	10248.4	10214.6	10458.6	10366.9	9188.85	9270.95	9517.24	9623.11	10387.4	10346.2	9324.65	1.11398	3.36748e-05	0.00171449
P16675	Lysosomal protective protein OS=Mus musculus OX=10090 GN=Ctsa PE=1 SV=1	6	8	11	1403.89	1482.17	1378.05	1376.19	1304.33	1371.36	1200.56	1177.4	1322.06	1499.4	1516.13	1408.56	1420.69	1350.23	1231.74	1473.93	1.19662	0.0053842	0.0324576
O88448	Kinesin light chain 2 OS=Mus musculus OX=10090 GN=Klc2 PE=1 SV=1	4	4	6	1077.11	1015.87	1019.74	958.647	894.661	876.723	912.094	920.432	908.107	859.303	976.194	1002.59	1037.2	909.341	913.53	943.919	1.14061	0.0409516	0.119512
Q8K094	Poliovirus receptor OS=Mus musculus OX=10090 GN=Pvr PE=1 SV=1	3	1	3	66.5074	97.592	73.9167	80.5492	79.9023	95.0872	101.964	72.4018	83.3919	77.6262	76.7506	74.2509	78.2844	84.9013	85.0694	76.1957	1.11646	0.704115	0.771299
Q14CH7	Alanine--tRNA ligase, mitochondrial OS=Mus musculus OX=10090 GN=Aars2 PE=1 SV=1	1	5	4	212.884	192.353	202.241	199.386	182.672	191.706	166.692	212.677	191.253	204.663	195.924	198.426	202.319	191.132	189.27	199.637	1.06894	0.611843	0.699792
Q91WM2	Haloacid dehalogenase-like hydrolase domain-containing 5 OS=Mus musculus OX=10090 GN=Hdhd5 PE=1 SV=1	2		2	93.5956		99.5462	103.616		91.2067	88.8071		98.871	102.555		98.95	96.525	97.2137	93.704	100.736	1.07505	0.742845	0.802649
Q99K85	Phosphoserine aminotransferase OS=Mus musculus OX=10090 GN=Psat1 PE=1 SV=1	29	33	26	15578.6	15860.8	15911.2	13885.7	13751.8	13292.6	13490.7	13614.2	13688.1	15354.8	15083.1	15418	15782.9	13641	13597.4	15284.6	1.16072	2.16225e-06	0.00032564
P58389	Serine/threonine-protein phosphatase 2A activator OS=Mus musculus OX=10090 GN=Ptpa PE=1 SV=1	7	5	5	1130.39	1154.25	1187.28	1134.53	1128.56	1132.24	1145.96	1171.58	1062.37	1199.14	1155.64	1228.14	1157.07	1131.77	1125.66	1193.94	1.06066	0.185393	0.318056
Q8R105	Vacuolar protein sorting-associated protein 37C OS=Mus musculus OX=10090 GN=Vps37c PE=1 SV=1	2	2	3	138.673	157.724	137.128	142.903	154.399	136.462	157.736	129.868	161.98	151.804	149.125	155.545	144.214	144.4	149.153	152.135	1.05493	0.806006	0.852027
Q6PIX5	Inactive rhomboid protein 1 OS=Mus musculus OX=10090 GN=Rhbdf1 PE=1 SV=2	3	1		290.358	271.613		271.651	290.221		278.191	281.021		301.306	298.651		280.829	280.783	279.602	299.976	1.07287	0.252386	0.39167
Q9CQF0	39S ribosomal protein L11, mitochondrial OS=Mus musculus OX=10090 GN=Mrpl11 PE=1 SV=1		3	2		542.16	560.718		546.399	512.543		522.766	496.339		547.986	589.712	551.361	529.201	509.381	568.467	1.11599	0.17598	0.307595
P58854	Gamma-tubulin complex component 3 OS=Mus musculus OX=10090 GN=Tubgcp3 PE=1 SV=2	9	10	10	1113.9	1095.48	1063.59	1234.98	1226.58	1218.43	1212.69	1196.42	1331.75	1124.78	1167.87	1072.58	1090.79	1226.65	1245.52	1121.06	1.14185	0.00636636	0.0361017
P32020	Non-specific lipid-transfer protein OS=Mus musculus OX=10090 GN=Scp2 PE=1 SV=3	11	7	11	1836.12	2044.76	1883.63	1926.64	1674.44	1914.38	1821.8	1606.35	1768.33	1910.51	2169.51	1928.72	1919.46	1834.71	1729.69	1999.52	1.156	0.136087	0.257966
P70195	Proteasome subunit beta type-7 OS=Mus musculus OX=10090 GN=Psmb7 PE=1 SV=1	8	11	8	1329.76	1440.74	1408.42	1393.63	1332.86	1310.83	1371.65	1338.36	1351.32	1450.06	1433.14	1474.53	1392.19	1345.32	1353.71	1452.48	1.07965	0.034377	0.106132
D3YZP9	Coiled-coil domain-containing protein 6 OS=Mus musculus OX=10090 GN=Ccdc6 PE=1 SV=1	5	5	6	887.233	872.936	876.147	902.138	936.118	931.136	877.517	900.819	914.308	911.419	868.434	856.715	878.751	923.008	897.419	878.545	1.05061	0.0771191	0.17968
Q9D2C2	Protein SAAL1 OS=Mus musculus OX=10090 GN=Saal1 PE=1 SV=1	7	3	5	554.082	602.485	577.615	620.644	578.339	590.204	605.678	614.954	566.191	557.842	542.468	604.236	577.723	596.132	595.227	567.585	1.0503	0.50786	0.618035
Q9D6Y7	Mitochondrial peptide methionine sulfoxide reductase OS=Mus musculus OX=10090 GN=Msra PE=1 SV=1	1		1	78.282		66.9979	76.766		72.3259	75.0246		78.3397	71.4366		83.8456	72.4205	74.5129	76.6642	77.3928	1.06866	0.851086	0.886083
Q60973	Histone-binding protein RBBP7 OS=Mus musculus OX=10090 GN=Rbbp7 PE=1 SV=1	11	13	5	2711	2759.24	2792.03	2666.95	2575.25	2571.19	2466.82	2380.4	2389.91	2696.31	2826.19	2787.95	2753.89	2604.09	2412.07	2769.61	1.14823	9.77172e-05	0.00298095
Q99LI7	Cleavage stimulation factor subunit 3 OS=Mus musculus OX=10090 GN=Cstf3 PE=1 SV=1	3	3	1	113.267	99.221	103.746	101.062	114.295	121.293	118.253	119.391	120.218	128.115	127.79	115.441	105.251	111.896	119.285	123.638	1.1747	0.0649762	0.161872
Q91XU3	Phosphatidylinositol 5-phosphate 4-kinase type-2 gamma OS=Mus musculus OX=10090 GN=Pip4k2c PE=1 SV=1	4	5	5	559.264	544.996	567.354	615.943	615.384	560.136	524.845	584.86	572.316	554.004	508.816	554.25	557.128	596.568	560.067	538.592	1.10764	0.143571	0.26771
Q9CQU5	ZW10 interactor OS=Mus musculus OX=10090 GN=Zwint PE=1 SV=1	4	3	1	361.796	349.202	340.883	382.646	343.549	346.999	307.928	337.205	330.369	337.908	360.322	372.027	350.522	357.304	324.923	356.468	1.09966	0.12147	0.241313
Q9DBH5	Vesicular integral-membrane protein VIP36 OS=Mus musculus OX=10090 GN=Lman2 PE=1 SV=2	5	5	3	1603.71	1604.65	1627.13	1549.77	1635.47	1604.95	1734.26	1604.56	1588.15	1540.05	1583.13	1607.57	1611.79	1596.34	1641.04	1576.67	1.04083	0.461359	0.579825
P36371	Antigen peptide transporter 2 OS=Mus musculus OX=10090 GN=Tap2 PE=1 SV=1			1			14.2			16.915			11.301			16.4483	14.2	16.915	11.301	16.4483	1.49677
O54988	STE20-like serine/threonine-protein kinase OS=Mus musculus OX=10090 GN=Slk PE=1 SV=2	5	12	26	1782.07	1854.93	1806.95	1957.53	1843.6	1870.35	1871.78	1837.14	1817.52	1671.86	1747.57	1788.41	1814.4	1889.88	1842.01	1735.27	1.0891	0.0238383	0.0842707
Q9R020	Zinc finger Ran-binding domain-containing protein 2 OS=Mus musculus OX=10090 GN=Zranb2 PE=1 SV=2	3	4	10	1225.55	1237.56	1170.21	1322.13	1293.22	1426.76	1324.65	1363.64	1326.18	1155.6	1133.5	1104.78	1210.75	1346.17	1338.04	1131.1	1.19014	0.000490174	0.00779374
O88685	26S proteasome regulatory subunit 6A OS=Mus musculus OX=10090 GN=Psmc3 PE=1 SV=2	35	34	30	6697.89	6536	6600.35	6632.25	6773.12	6616.76	6359.62	6584.57	6430.39	6705.21	6501.27	6747.46	6611.08	6673.67	6457.51	6650.44	1.03347	0.127384	0.247991
O54956	DNA polymerase epsilon subunit 2 OS=Mus musculus OX=10090 GN=Pole2 PE=2 SV=2	4	1	1	61.3218	50.5869	55.2222	38.1016	48.6282	49.9323	30.8268	39.7692	44.7453	65.0574	56.3232	45.4077	55.5378	45.2277	37.9963	55.0011	1.46167	0.0549532	0.145662
Q68EF0	Rab-3A-interacting protein OS=Mus musculus OX=10090 GN=Rab3ip PE=1 SV=1	2	2	4	127.656	142.885	135.759	146.21	132.375	138.44	112.432	135.138	134.887	151.093	126.995	128.306	135.29	138.893	127.022	135.029	1.09346	0.603399	0.693811
Q3TMX5	Arginine-rich, mutated in early stage tumors, isoform CRA_b OS=Mus musculus OX=10090 GN=Manf PE=1 SV=1	3	5	6	1221.19	1179.91	1144.9	1251.28	1215.16	1227.07	1180.26	1206.82	1253.62	1092.07	1142.9	1119.2	1181.59	1231.08	1213.19	1117.86	1.10128	0.00862891	0.0433667
Q9DBP5	UMP-CMP kinase OS=Mus musculus OX=10090 GN=Cmpk1 PE=1 SV=1	12	10	9	1510.61	1594.77	1621.88	1556.59	1439.79	1417.73	1507.21	1550.35	1389.43	1615.24	1604.74	1760.61	1575.03	1470.13	1480.74	1658.7	1.12827	0.0533366	0.142678
Q9Z2I0	Mitochondrial proton/calcium exchanger protein OS=Mus musculus OX=10090 GN=Letm1 PE=1 SV=1	15	17	18	2113.56	2015.34	2040.77	1936.46	2015.53	1945.49	1949.26	1855.04	1924.42	1943.76	2057.12	2032.36	2056.14	1965.51	1909.15	2010.48	1.07699	0.0380168	0.114515
P14576	Signal recognition particle 54 kDa protein OS=Mus musculus OX=10090 GN=Srp54 PE=1 SV=2	10	15	11	1734.74	1753.24	1725.5	1818.54	1840.18	1781.43	1748.37	1710.1	1839.58	1808.09	1806.22	1763.24	1737.79	1813.22	1765.19	1792.4	1.04341	0.176795	0.308535
Q9Z2Z6	Mitochondrial carnitine/acylcarnitine carrier protein OS=Mus musculus OX=10090 GN=Slc25a20 PE=1 SV=1	1	2		211.268	182.956		187.548	197.404		162.498	179.038		191.233	193.15		196.603	192.413	170.568	192.189	1.15264	0.252528	0.39167
P63321	Ras-related protein Ral-A OS=Mus musculus OX=10090 GN=Rala PE=1 SV=1	3	2	3	671.732	655.717	647.943	624.257	660.988	650.687	590.077	587.344	630.007	628.743	610.759	586.172	658.39	645.124	602.165	608.307	1.09337	0.0213808	0.0783628
B9EKI3	TATA element modulatory factor OS=Mus musculus OX=10090 GN=Tmf1 PE=1 SV=2	1	1	2	215.825	185.62	192.389	198.997	195.902	201.832	203.597	190.84	196.899	167.469	213.528	194.769	197.531	198.895	197.043	190.972	1.04149	0.911242	0.93173
Q80U78	Pumilio homolog 1 OS=Mus musculus OX=10090 GN=Pum1 PE=1 SV=2	4	5	2	324.015	250.731	273.03	233.975	292.398	275.144	212.729	266.298	304.531	301.877	263.169	219.891	280.971	266.012	258.39	259.472	1.08739	0.892425	0.916492
P41778	Pre-B-cell leukemia transcription factor 1 OS=Mus musculus OX=10090 GN=Pbx1 PE=1 SV=2	6	3	3	513.55	492.335	530.996	548.369	537.613	511.561	447.772	515.145	497.527	551.995	516.592	521.602	512.049	532.288	485.961	529.835	1.09533	0.157209	0.284532
A0A0R4J018	Thiopurine S-methyltransferase OS=Mus musculus OX=10090 GN=Tpmt PE=1 SV=1	6	5	2	338.301	380.818	388.216	406.138	354.367	381.419	453.033	401.518	373.404	337.294	398.062	391.727	368.438	380.052	408.01	374.669	1.10741	0.499964	0.611603
Q8BKE6	Cytochrome P450 20A1 OS=Mus musculus OX=10090 GN=Cyp20a1 PE=1 SV=1	9	12	7	1464.37	1433.75	1445.03	1400.47	1444.11	1450	1431.23	1488.84	1405.69	1381.13	1310.49	1376.46	1447.66	1431.35	1441.5	1355.64	1.06788	0.0290872	0.095476
Q01149	Collagen alpha-2(I) chain OS=Mus musculus OX=10090 GN=Col1a2 PE=1 SV=2	1	2	2	164.164	139.12	158.491	161.087	142.79	151.214	114.412	155.214	155.641	143.576	146.115	117.893	153.541	151.513	140.338	135.235	1.13536	0.535004	0.639929
Q9CR39	WD repeat domain phosphoinositide-interacting protein 3 OS=Mus musculus OX=10090 GN=Wdr45b PE=1 SV=2	2	2	2	202.906	258.095	226.19	248.506	235.542	255.903	267.019	205.191	260.4	228.67	248.273	204.608	227.955	246.506	242.538	226.475	1.08845	0.709581	0.776379
P04627	Serine/threonine-protein kinase A-Raf OS=Mus musculus OX=10090 GN=Araf PE=1 SV=2	5	5	2	305.497	290.375	272.249	269.467	285.949	269.48	264.073	282.152	299.696	288.516	269.076	286.127	289.053	274.857	281.598	281.105	1.05165	0.685869	0.758407
Q8C6E0	Cilia- and flagella-associated protein 36 OS=Mus musculus OX=10090 GN=Cfap36 PE=1 SV=1	2	1	2	60.8201	60.4264	50.6318	42.9285	47.767	49.8261	48.8182	56.8445	44.1859	61.2101	48.739	69.133	57.0908	46.7495	49.6803	59.0829	1.26382	0.152138	0.278473
Q80XI4	Phosphatidylinositol 5-phosphate 4-kinase type-2 beta OS=Mus musculus OX=10090 GN=Pip4k2b PE=1 SV=1	3	6	4	625.628	707.718	684.171	851.112	716.471	745.409	779.124	747.314	754.612	608.242	692.603	679.913	671.605	768.883	760.229	659.181	1.16642	0.0407633	0.119185
Q9CXJ4	ATP-binding cassette sub-family B member 8, mitochondrial OS=Mus musculus OX=10090 GN=Abcb8 PE=1 SV=1	1	1	1	68.52	74.5646	73.2002	76.6091	64.9457	65.7044	65.7621	71.771	71.3018	74.2746	73.8845	74.9595	72.0478	68.8877	69.5572	74.3715	1.0796	0.390165	0.52046
P62748	Hippocalcin-like protein 1 OS=Mus musculus OX=10090 GN=Hpcal1 PE=1 SV=2	11	12	11	2061.83	2033.84	2143.64	2234.82	2267.57	2215.83	2301.35	2173.72	2218.54	2108.97	2231.84	2128.96	2079.25	2239.31	2230.58	2155.93	1.07698	0.0246461	0.0860868
O70251	Elongation factor 1-beta OS=Mus musculus OX=10090 GN=Eef1b PE=1 SV=5	17	16	15	9633.28	9512.7	9428.86	9403.43	9814.58	9643.56	9457	9593.93	9676.74	9485.49	9058	9230.04	9524.58	9619.04	9575.46	9256.18	1.0392	0.103569	0.217835
O70172	Phosphatidylinositol 5-phosphate 4-kinase type-2 alpha OS=Mus musculus OX=10090 GN=Pip4k2a PE=1 SV=1	1	2	1	84.7247	89.3177	100.323	89.2594	81.8235	82.6451	91.0945	89.3386	105.252	83.5482	88.1471	60.407	91.2254	84.5116	94.9702	76.3386	1.24406	0.2144	0.351874
Q7TMY7	Importin-8 OS=Mus musculus OX=10090 GN=Ipo8 PE=1 SV=3	1	1	3	108.047	105.874	109.604	88.3072	104.19	99.5004	112.667	109.066	106.128	111.97	101.861	105.76	107.831	97.0993	109.254	106.449	1.12518	0.0838921	0.190475
P12382	ATP-dependent 6-phosphofructokinase, liver type OS=Mus musculus OX=10090 GN=Pfkl PE=1 SV=4	10	15	20	2417.02	2567.99	2484.86	2539.76	2404.01	2564.13	2637.52	2579.3	2624.09	2504.77	2547.78	2425.98	2489.19	2501.63	2613.52	2492.33	1.04995	0.156163	0.283477
Q8C1Y8	Vacuolar fusion protein CCZ1 homolog OS=Mus musculus OX=10090 GN=Ccz1 PE=1 SV=1	3	4	3	343.205	349.739	347.387	338.983	346.656	351.437	367.231	359.52	364.255	348.541	342.046	334.882	346.767	345.654	363.655	341.777	1.06401	0.00493751	0.0309969
Q8BP27	Swi5-dependent recombination DNA repair protein 1 homolog OS=Mus musculus OX=10090 GN=Sfr1 PE=1 SV=2	4	7	4	989.808	1038.45	1038.22	1000.27	1004.65	946.935	991.722	920.732	913.723	1003.82	1021.79	1086.74	1021.9	983.595	941.411	1036.85	1.10137	0.0524548	0.141022
E9QN31	Probable 28S rRNA (cytosine-C(5))-methyltransferase OS=Mus musculus OX=10090 GN=Nop2 PE=1 SV=1		1	1		31.7855	24.6033		21.4232	29.097		20.1518	27.0211		37.3998	30.0388	27.9648	24.967	23.335	33.5178	1.43637	0.372425	0.506075
O35657	Sialidase-1 OS=Mus musculus OX=10090 GN=Neu1 PE=1 SV=1	2	2	1	122.366	127.337	104.886	121.236	120.867	132.408	123.932	121.102	135.969	130.743	128.972	125.015	117.79	124.724	126.841	128.221	1.08855	0.448969	0.569601
Q5SWD9	Pre-rRNA-processing protein TSR1 homolog OS=Mus musculus OX=10090 GN=Tsr1 PE=1 SV=1	5	3	3	405.91	372.72	380.843	429.557	465.569	415.711	431.202	449.628	486.189	402.982	381.735	386.908	386.236	436.448	455.106	390.438	1.17831	0.00839243	0.0427749
Q8R326	Paraspeckle component 1 OS=Mus musculus OX=10090 GN=Pspc1 PE=1 SV=1	7	5	6	815.679	578.162	659.514	761.565	888.183	759.1	698.86	784.063	884.637	810.559	836.255	783.412	677.534	800.761	785.541	809.788	1.1952	0.272781	0.411631
Q62419	Endophilin-A2 OS=Mus musculus OX=10090 GN=Sh3gl1 PE=1 SV=1	19	22	20	5174.8	5066.36	5136.48	5590.14	5624.54	5645.86	5278.35	5643.14	5500.12	5130.05	4839.29	4890.87	5125.68	5620.13	5471.8	4951.8	1.13497	0.00063061	0.00907688
Q80X50	Ubiquitin-associated protein 2-like OS=Mus musculus OX=10090 GN=Ubap2l PE=1 SV=1	9	11	17	1758.76	1581.59	1641.9	1711.35	1966.51	1794.72	1810.99	1823.9	1935.79	1762.2	1671.3	1670.89	1659.14	1821.14	1856.06	1700.93	1.11869	0.074098	0.174879
Q8K2V1	Serine/threonine-protein phosphatase 4 regulatory subunit 1 OS=Mus musculus OX=10090 GN=Ppp4r1 PE=1 SV=2	6	3	6	246.301	256.049	256.54	223.622	271.423	259.204	315.749	252.516	238.083	236.49	242.174	268.336	252.919	250.573	266.759	248.622	1.07295	0.807817	0.852978
Q9D6K5	Synaptojanin-2-binding protein OS=Mus musculus OX=10090 GN=Synj2bp PE=1 SV=1	3	2	3	480.685	466.941	501.673	498.71	549.348	521.978	494.043	463.361	472.759	495.735	489.525	472.764	482.89	522.937	476.549	485.911	1.09734	0.0537446	0.143441
Q61107	Guanylate-binding protein 4 OS=Mus musculus OX=10090 GN=Gbp4 PE=1 SV=1		2	1		107.861	112.985		119.684	141.608		180.579	140.612		108.475	121.394	110.393	130.185	159.347	114.753	1.44345	0.101925	0.215733
A0A087WSP5	Signal transducer and activator of transcription OS=Mus musculus OX=10090 GN=Stat1 PE=1 SV=1	35	33	30	5926.9	6205.82	6035.14	6433.42	6121.11	6554.27	6407.39	6331.42	6216.2	6075.31	6184.66	6037.41	6054.87	6366.96	6317.85	6098.81	1.05154	0.0709101	0.17033
Q9D1Q6	Endoplasmic reticulum resident protein 44 OS=Mus musculus OX=10090 GN=Erp44 PE=1 SV=1	5	9	9	1668.83	1852.88	1919.96	2246.21	1932.82	1894.41	1994.22	2015.75	1916.17	1747.72	1855.52	1926.43	1810.71	2018.55	1974.91	1841.75	1.11478	0.199869	0.333757
Q80YA7	Dipeptidyl peptidase 8 OS=Mus musculus OX=10090 GN=Dpp8 PE=1 SV=1	2	2	2	227.802	239.081	213.303	204.877	209.19	225.414	180.678	201.901	209.913	247.325	210.511	212.053	226.482	212.98	197.103	222.67	1.14905	0.154641	0.281824
Q9D0K2	Succinyl-CoA:3-ketoacid coenzyme A transferase 1, mitochondrial OS=Mus musculus OX=10090 GN=Oxct1 PE=1 SV=1	22	28	31	7746.9	8118.41	7969.8	7562.76	7405.59	7471.67	7446.07	7144.25	7034.13	7553.92	7641.4	7834.05	7943.57	7479.73	7206.06	7675.57	1.10234	0.00345271	0.0245413
Q505B7	Protein archease OS=Mus musculus OX=10090 GN=Zbtb8os PE=1 SV=2	2	2	2	482.378	503.383	482.53	498.581	503.48	525.457	495.396	497.931	509.028	456.975	428.536	416.315	489.332	509.04	500.75	433.611	1.17395	0.000884751	0.0108486
Q8C0I1	Alkyldihydroxyacetonephosphate synthase, peroxisomal OS=Mus musculus OX=10090 GN=Agps PE=1 SV=1	8	13	7	1158.25	1116.59	1135.86	1074.49	1092.44	1020.18	1074.19	1014.6	1035.72	982.801	1066.11	1097.98	1136.77	1061.92	1041.21	1047.82	1.09178	0.0732587	0.173611
Q8C5W3	Tubulin-specific chaperone cofactor E-like protein OS=Mus musculus OX=10090 GN=Tbcel PE=1 SV=1	5	4	3	583.045	619.095	636.254	649.471	589.907	605.856	628.411	617.311	565.637	536.464	571.079	589.644	612.393	614.569	603.154	565.296	1.08716	0.220055	0.357028
Q1HFZ0	tRNA (cytosine(34)-C(5))-methyltransferase OS=Mus musculus OX=10090 GN=Nsun2 PE=1 SV=2	8	12	13	1349.84	1289.25	1248.24	1214.88	1219.55	1239.64	1169.23	1219.84	1285.49	1289.74	1295.05	1250.31	1295.11	1224.64	1223.93	1278.21	1.05815	0.14501	0.26975
P55264	Adenosine kinase OS=Mus musculus OX=10090 GN=Adk PE=1 SV=2	9	6	13	2283.53	2326.83	2469.25	2693.63	2507.11	2507.29	2679.38	2794.01	2427.68	2338.05	2366.65	2590.37	2358.55	2567.86	2629.16	2429.12	1.11474	0.129591	0.249857
Q8K4Q0	Regulatory-associated protein of mTOR OS=Mus musculus OX=10090 GN=Rptor PE=1 SV=1	5	6	5	525.657	536.471	524.893	538.357	522.226	564.112	535.602	537.165	566.187	559.307	563.06	503.731	528.98	541.292	546.139	541.337	1.03244	0.795474	0.84375
P97770	THUMP domain-containing protein 3 OS=Mus musculus OX=10090 GN=Thumpd3 PE=1 SV=1	5	6	6	1148.38	1177.37	1124.19	1148.19	1150	1147.39	1110.41	1128.24	1145.51	1122.34	1073.71	1112.23	1149.77	1148.53	1127.96	1102.56	1.04282	0.0696188	0.168873
Q9EPJ9	ADP-ribosylation factor GTPase-activating protein 1 OS=Mus musculus OX=10090 GN=Arfgap1 PE=1 SV=2	8	7	10	1263.23	1396.47	1326.81	1419.45	1267.62	1346.21	1452.85	1442.43	1307.43	1207.89	1236.89	1362.97	1327.72	1343	1399.3	1267.5	1.10399	0.28805	0.425267
Q9DCT1	1,5-anhydro-D-fructose reductase OS=Mus musculus OX=10090 GN=Akr1e2 PE=1 SV=1	3	2	2	352.187	349.939	327.882	328.243	321.296	333.535	328.641	339.845	373.913	358.333	356.324	332.073	343.158	327.653	346.943	348.702	1.06424	0.376007	0.508728
Q99JX4	Eukaryotic translation initiation factor 3 subunit M OS=Mus musculus OX=10090 GN=Eif3m PE=1 SV=1	9	13	12	1596.64	1556.79	1592.19	1619.59	1648.03	1587	1642.11	1668.14	1701.66	1632.31	1617.69	1609.8	1581.77	1618.01	1670.46	1619.9	1.05607	0.0150215	0.0619189
Q8R0F6	Integrin-linked kinase-associated serine/threonine phosphatase 2C OS=Mus musculus OX=10090 GN=Ilkap PE=1 SV=1	6	5	5	798.69	718.225	759.379	841.351	905.628	834.245	838.235	854.058	902.421	744.488	744.852	726.718	758.052	859.819	864.478	738.638	1.17037	0.00217724	0.0183762
Q00623	Apolipoprotein A-I OS=Mus musculus OX=10090 GN=Apoa1 PE=1 SV=2	1	2	2	1787.75	1499.03	1584.72	1547.28	1823.21	1600.17	1694.89	1651.9	1999.85	1763.25	1819.04	1608.42	1619.41	1652.69	1775.72	1727.9	1.09652	0.583892	0.678809
Q9WV80	Sorting nexin-1 OS=Mus musculus OX=10090 GN=Snx1 PE=1 SV=1	12	14	16	3751.29	3842.66	3776.97	3746.2	3707.37	3754.33	3747.43	3733.5	3740.26	3758.74	3720.12	3732.1	3790.11	3735.91	3740.39	3736.95	1.01451	0.130494	0.250505
H3BIV6	Cysteine and histidine-rich protein 1 OS=Mus musculus OX=10090 GN=Cyhr1 PE=1 SV=1	2	3	1	223.467	203.988	220.586	208.222	221.029	224.932	229.237	227.562	199.751	201.461	209.807	217.118	215.84	217.943	218.419	209.364	1.04325	0.757883	0.814951
Q9Z207	Protein diaphanous homolog 3 OS=Mus musculus OX=10090 GN=Diaph3 PE=1 SV=1	2	2	1	85.6577	78.559	82.1391	77.2967	92.4336	76.1945	65.089	75.3197	79.5887	84.7829	66.514	74.904	82.0674	81.6529	73.0728	75.0312	1.12309	0.414617	0.541842
O88413	Tubby-related protein 3 OS=Mus musculus OX=10090 GN=Tulp3 PE=1 SV=1	1	1	1	171.56	160.783	173.696	183.432	196.333	182.338	171.853	193.564	180.971	187.752	163.917	177.592	168.584	187.262	181.913	176.148	1.11079	0.179011	0.311128
P62257	Ubiquitin-conjugating enzyme E2 H OS=Mus musculus OX=10090 GN=Ube2h PE=1 SV=1	4	3	5	615.942	668.35	678.991	721.947	693.527	650.946	618.699	638.618	578.026	625.128	581.221	673.754	653.836	688.184	611.255	625.562	1.12585	0.140503	0.264092
Q8K2F8	Protein LSM14 homolog A OS=Mus musculus OX=10090 GN=Lsm14a PE=1 SV=1	5	5	5	834.42	791.65	735.31	795.428	860.486	803.931	887.724	864.317	981.923	831.837	832.956	828.244	786.073	819.447	909.933	831.01	1.15757	0.0418372	0.121116
Q9JMA1	Ubiquitin carboxyl-terminal hydrolase 14 OS=Mus musculus OX=10090 GN=Usp14 PE=1 SV=3	18	25	21	3813.35	3902.64	3853.21	3790.89	3634.74	3549.71	3519.54	3547.88	3667.66	3746.41	3784.93	3799.61	3856.23	3657.09	3577.79	3776.92	1.07783	0.0103242	0.0481265
Q9CQ45	Neudesin OS=Mus musculus OX=10090 GN=Nenf PE=1 SV=1	3	3	4	749.216	765.271	737.007	757.402	798.898	747.071	744.144	764.357	720.146	722.865	645.1	769.403	750.409	767.467	742.662	710.579	1.08006	0.37105	0.504807
B1AY13	Ubiquitin carboxyl-terminal hydrolase 24 OS=Mus musculus OX=10090 GN=Usp24 PE=1 SV=1	7	8	9	904.275	955.454	918.443	942.014	936.934	956.189	942.535	904.972	933.122	929.079	920.542	910.148	925.808	945.011	926.738	919.89	1.02731	0.402153	0.531213
P15379	CD44 antigen OS=Mus musculus OX=10090 GN=Cd44 PE=1 SV=3	4	3	5	1187.54	1183.24	1226.12	1259.3	1348.43	1288	1371.69	1345.1	1358.68	1306.65	1248.42	1252.38	1198.81	1298.05	1358.45	1268.88	1.13316	0.00156318	0.0152801
P52623	Uridine-cytidine kinase 1 OS=Mus musculus OX=10090 GN=Uck1 PE=1 SV=2	2	4	2	415.159	403.534	385.783	476.63	418.871	405.683	431.219	452.182	481.9	382.249	430.67	431.891	401.309	432.663	454.628	414.275	1.13286	0.176058	0.307595
Q9D7M8	DNA-directed RNA polymerase II subunit RPB4 OS=Mus musculus OX=10090 GN=Polr2d PE=1 SV=2	2	1	1	44.7356	45.9443	51.9306	57.2904	56.2761	46.9843	49.6315	55.0971	50.5373	44.0127	38.3527	46.218	47.4354	53.3072	51.701	42.7296	1.24755	0.0571596	0.149245
Q9DBG7	Signal recognition particle receptor subunit alpha OS=Mus musculus OX=10090 GN=Srpra PE=1 SV=1	6	8	10	972.808	928.986	916.878	978.314	1021.23	992.108	1027.68	973.086	1031.69	885.373	940.865	923.491	939.253	997.059	1010.46	916.281	1.10278	0.0100553	0.0476033
Q80X73	Protein pelota homolog OS=Mus musculus OX=10090 GN=Pelo PE=1 SV=3	4	4	4	308.548	255.295	299.587	280.094	314.349	302.263	285.114	315.728	265.511	276.55	264.935	282.946	286.833	298.561	288.052	274.709	1.08683	0.621804	0.706666
Q8VCE2	GPN-loop GTPase 1 OS=Mus musculus OX=10090 GN=Gpn1 PE=1 SV=1	2	3	4	245.953	239.476	243.521	215.34	237.978	236.686	233.822	233.016	236.07	263.382	248.028	242.221	242.968	229.762	234.299	251.053	1.09267	0.0683441	0.166558
Q6GQT9	Nodal modulator 1 OS=Mus musculus OX=10090 GN=Nomo1 PE=1 SV=1	14	18	15	2034.79	1984.04	1971.52	2079.41	2136.01	2193.31	2040.87	2095.6	2166.25	2141.62	2081.04	1965.61	1996.6	2135.74	2100.28	2061.45	1.06969	0.120986	0.241149
Q924Z6	Exportin-6 OS=Mus musculus OX=10090 GN=Xpo6 PE=1 SV=2	1	1	1	31.486	25.0724	30.728	23.2289	28.052	22.7803	29.2299	22.9327	29.2265	27.6171	35.5047	28.827	28.9478	24.5764	26.9579	30.4617	1.23947	0.272303	0.411176
Q64133	Amine oxidase [flavin-containing] A OS=Mus musculus OX=10090 GN=Maoa PE=1 SV=3	9	14	14	3409.79	3264.37	3221.29	2964.8	3180.99	3109.7	3125.08	2991.85	2922.88	3316.52	3378.96	3562.32	3297.51	3083.84	3012.11	3417.69	1.13465	0.0066598	0.0372694
Q65Z40	Wings apart-like protein homolog OS=Mus musculus OX=10090 GN=Wapl PE=1 SV=2	1	1	1	51.918	44.8783	43.8129	45.5522	51.9025	43.1792	37.451	38.8386	45.487	44.7219	44.0236	47.1639	46.736	46.7366	40.4456	45.2834	1.15554	0.204421	0.339633
P63017	Heat shock cognate 71 kDa protein OS=Mus musculus OX=10090 GN=Hspa8 PE=1 SV=1	63	71	69	42871.8	43614.5	43758.2	44795.2	44802.7	44204.2	44488	43369.2	44280.6	43434.5	43803.1	43346.5	43413.1	44599.8	44043.2	43527.6	1.02734	0.0368175	0.111765
Q8BX02	KN motif and ankyrin repeat domain-containing protein 2 OS=Mus musculus OX=10090 GN=Kank2 PE=1 SV=1	19	14	14	2242.68	2123.38	2198.18	2250.5	2329.46	2182.46	2178.38	2157.19	2304.93	2253.75	2315.29	2239.74	2187.53	2253.34	2212.55	2269.35	1.03741	0.445094	0.566185
O35864	COP9 signalosome complex subunit 5 OS=Mus musculus OX=10090 GN=Cops5 PE=1 SV=3	18	16	15	2177.14	2182.33	2173.76	2230.91	2147.85	2291.09	2203.13	2397.77	2215.29	2254.8	2138.04	2185.84	2177.74	2222.5	2270.35	2192.37	1.04253	0.437119	0.559646
Q9R0N0	Galactokinase OS=Mus musculus OX=10090 GN=Galk1 PE=1 SV=2	11	9	11	1775.79	1843.83	1841.28	1939.13	1731.9	1818.34	1832.09	1950.6	1791.3	1757.02	1777.69	1853.1	1820.02	1827.82	1856.78	1795.46	1.03415	0.784469	0.836053
O35459	Delta(3,5)-Delta(2,4)-dienoyl-CoA isomerase, mitochondrial OS=Mus musculus OX=10090 GN=Ech1 PE=1 SV=1	2	2	2	266.037	263.821	242.237	249.982	252.537	266.127	253.298	262.976	261.713	291.621	281.603	290.861	257.137	256.118	259.293	287.992	1.12445	0.00797476	0.0413557
O09117	Synaptophysin-like protein 1 OS=Mus musculus OX=10090 GN=Sypl1 PE=1 SV=2	2	2	2	459.773	447.778	393.35	420.974	372.008	422.395	360.164	383.279	384.229	365.525	403.371	406.462	432.642	404.429	375.724	391.334	1.15149	0.133364	0.25414
Q8CGC7	Bifunctional glutamate/proline--tRNA ligase OS=Mus musculus OX=10090 GN=Eprs PE=1 SV=4	57	57	69	16069.8	16001.4	15555.3	15355.7	15328.3	15275.9	15297.8	15265.6	15414.8	14594.8	14722.8	15072.2	15873.8	15319.9	15325.9	14795.2	1.0729	0.000985811	0.0117495
P0DP27	Calmodulin-2 OS=Mus musculus OX=10090 GN=Calm2 PE=1 SV=1	34	30	28	17806.5	19308.8	18674.2	17321.5	15772.2	18377.8	19038.5	17752.9	15582.5	16927.5	18260.1	18459.5	18586.3	17123.4	17398.6	17869.2	1.08543	0.545184	0.647803
Q8BUV3	Gephyrin OS=Mus musculus OX=10090 GN=Gphn PE=1 SV=2	6	7	10	827.825	829.879	850.674	804.269	866.676	837.206	802.911	862.343	789.653	871.584	747.691	829.055	836.063	835.661	817.701	814.463	1.02652	0.870011	0.898993
Q8R1T1	Charged multivesicular body protein 7 OS=Mus musculus OX=10090 GN=Chmp7 PE=1 SV=1	4	2	4	361.568	365.728	363.225	393.669	366.104	345.156	354.643	396.369	373.637	335.069	316.748	362.932	363.503	367.776	374.496	337.721	1.10889	0.187655	0.320678
Q8BR63	Protein FAM177A1 OS=Mus musculus OX=10090 GN=Fam177a1 PE=1 SV=1	1	1	1	77.7401	75.2505	84.0439	71.2322	63.8035	68.2694	69.5375	75.9745	83.3995	77.6242	81.1055	60.4212	78.926	67.699	76.094	72.4567	1.16584	0.331308	0.468411
P70227	Inositol 1,4,5-trisphosphate receptor type 3 OS=Mus musculus OX=10090 GN=Itpr3 PE=1 SV=3	19	19	12	1562.54	1478.64	1494.89	1348.99	1413.31	1303.46	1249.67	1311.85	1367.03	1391.36	1348.75	1387.17	1511.59	1354.51	1308.63	1375.63	1.15509	0.00519909	0.0320428
E9Q8L9	Rab11 family-interacting protein 1 OS=Mus musculus OX=10090 GN=Rab11fip1 PE=1 SV=1	2	2	3	132.878	139.165	128.134	139.498	137.693	155.018	147.869	148.916	136.365	141.348	135.819	142.075	133.316	143.865	144.269	139.719	1.08216	0.224406	0.362051
Q8R361	Rab11 family-interacting protein 5 OS=Mus musculus OX=10090 GN=Rab11fip5 PE=1 SV=2	4	2	2	306.686	297.376	290.536	286.462	277.976	293.187	253.236	288.466	273.867	289.742	272.308	278.537	298.126	285.807	271.469	280.103	1.0982	0.112807	0.229334
Q9Z0G0	PDZ domain-containing protein GIPC1 OS=Mus musculus OX=10090 GN=Gipc1 PE=1 SV=1	6	5	4	823.409	879.449	855.074	861.496	909.867	872.699	796.884	802.225	796.961	893.739	783.987	850.794	852.334	881.113	798.686	841.617	1.1032	0.0852214	0.192375
Q80UU9	Membrane-associated progesterone receptor component 2 OS=Mus musculus OX=10090 GN=Pgrmc2 PE=1 SV=2	8	6	6	933.22	861.275	851.34	891.757	992.972	946.883	892.437	862.819	891.39	887.122	887.47	914.923	881.204	942.96	882.108	896.411	1.07008	0.192982	0.326511
Q91ZA3	Propionyl-CoA carboxylase alpha chain, mitochondrial OS=Mus musculus OX=10090 GN=Pcca PE=1 SV=2	10	6	12	1397.98	1423.14	1409.27	1411.76	1434.37	1382.75	1384.08	1392.1	1383.66	1408.48	1352.68	1426.61	1410.09	1409.47	1386.61	1395.57	1.01693	0.597567	0.68958
Q9CPN8	Insulin-like growth factor 2 mRNA-binding protein 3 OS=Mus musculus OX=10090 GN=Igf2bp3 PE=1 SV=1	5	6	4	555.937	480.244	505.779	496.983	545.407	469.69	446.26	485.263	509.797	518.763	507.03	532.677	513.038	503.066	479.72	519.384	1.08268	0.484321	0.599473
Q7TNC4	Putative RNA-binding protein Luc7-like 2 OS=Mus musculus OX=10090 GN=Luc7l2 PE=1 SV=1	7	9	9	1158.11	1148.85	1199.47	1199.71	1219.06	1188.27	1125.05	1130.96	1131.17	1281.76	1265.76	1245.72	1168.61	1202.28	1129.06	1264.33	1.11981	0.000101879	0.00307873
Q920P5	Adenylate kinase isoenzyme 5 OS=Mus musculus OX=10090 GN=Ak5 PE=1 SV=2	5	4	5	608.924	640.7	620.198	696.084	632.986	712.725	666.73	696.311	686.949	628.907	630.647	580.773	623.136	679.714	683.218	612.999	1.11455	0.026215	0.089908
Q9CQ65	S-methyl-5'-thioadenosine phosphorylase OS=Mus musculus OX=10090 GN=Mtap PE=1 SV=1	20	28	27	7311.87	7613.98	7589.09	7622.36	7078.02	7465.03	7615.45	7591.42	7456.62	7340.06	7606.32	7379	7503.72	7384.89	7554.17	7440.87	1.02292	0.708601	0.775669
Q8CCS6	Polyadenylate-binding protein 2 OS=Mus musculus OX=10090 GN=Pabpn1 PE=1 SV=3	2			376.789			348.036			433.768			385.701			376.789	348.036	433.768	385.701	1.24633
P51943	Cyclin-A2 OS=Mus musculus OX=10090 GN=Ccna2 PE=1 SV=2	2	3	2	114.191	124.812	123.076	134.469	124.339	127.417	120.83	129.739	125.773	133.43	124.03	126.653	120.602	128.672	125.394	127.977	1.06692	0.270204	0.408869
P55258	Ras-related protein Rab-8A OS=Mus musculus OX=10090 GN=Rab8a PE=1 SV=2	8	7	6	1185.15	1195.54	1147.01	1251.48	1179.96	1217.36	1198.06	1197.83	1209.29	1145.67	1207.04	1206.7	1175.71	1215.92	1201.71	1186.12	1.0342	0.387495	0.51784
Q9ERS5	Pleckstrin homology domain-containing family A member 2 OS=Mus musculus OX=10090 GN=Plekha2 PE=1 SV=1	3	2	3	496.363	483.44	482.778	471.202	467.85	463.535	457.47	468.842	467.114	463.651	468.553	475.259	487.487	467.518	464.448	469.13	1.04961	0.00623792	0.0356757
Q61035	Histidine--tRNA ligase, cytoplasmic OS=Mus musculus OX=10090 GN=Hars PE=1 SV=2	14	13	19	3110.51	3268.13	3214.85	3227.77	3128.33	3138.91	3028.16	3133.99	3113.95	3201.98	3037.96	3100.72	3197.16	3164.69	3091.69	3112.82	1.03411	0.304357	0.442185
P50295	Arylamine N-acetyltransferase 2 OS=Mus musculus OX=10090 GN=Nat2 PE=1 SV=1	5	2	4	429.597	447.789	426.912	494.487	455.907	435.442	437.085	445.103	446.366	384.927	397.297	437.376	434.668	461.304	442.832	405.929	1.13642	0.0637838	0.160365
Q99LJ0	CTTNBP2 N-terminal-like protein OS=Mus musculus OX=10090 GN=Cttnbp2nl PE=1 SV=1	4	4	3	729.729	709.41	767.028	750.878	831.641	755.351	718.019	733.838	757.079	795.902	719.638	715.069	735.004	778.427	736.138	742.632	1.05908	0.456494	0.575874
P30681	High mobility group protein B2 OS=Mus musculus OX=10090 GN=Hmgb2 PE=1 SV=3	10	9	9	4555.17	4505.64	4360.6	4668.43	4391.18	4878.97	4686.94	4682.76	4835.22	4709.14	5040.1	4544.89	4473.03	4641.87	4734.45	4760.31	1.06422	0.290089	0.427178
Q8R4N0	Citramalyl-CoA lyase, mitochondrial OS=Mus musculus OX=10090 GN=Clybl PE=1 SV=2	3	7	4	1047.19	1081.19	1083.27	1142.75	1067.77	1147.84	1177.76	1190.94	1122.33	1023.88	1051.69	1038.14	1070.42	1118.84	1163.29	1037.84	1.12088	0.00524701	0.0321268
Q921I6	SH3 domain-binding protein 4 OS=Mus musculus OX=10090 GN=Sh3bp4 PE=1 SV=1	7	10	7	918.409	866.642	871.689	865.035	886.347	815.263	865.612	886.505	867.521	846.845	856.407	941.429	885.277	855.024	873.162	880.557	1.03538	0.732965	0.794357
P70333	Heterogeneous nuclear ribonucleoprotein H2 OS=Mus musculus OX=10090 GN=Hnrnph2 PE=1 SV=1	4	4	7	241.333	215.108	223.24	200.815	254.206	226.157	253.18	221.893	242.114	237.27	241.391	241.087	226.298	226.011	238.707	239.908	1.06149	0.641502	0.722481
O70310	Glycylpeptide N-tetradecanoyltransferase 1 OS=Mus musculus OX=10090 GN=Nmt1 PE=1 SV=1	17	14	13	1557.48	1468.64	1478.68	1615.47	1711.2	1661.54	1785.9	1745.88	1866.59	1639.97	1673.1	1592.01	1501.08	1662.28	1798.76	1634.69	1.19831	0.000629032	0.00907688
Q9CQI6	Coactosin-like protein OS=Mus musculus OX=10090 GN=Cotl1 PE=1 SV=3	7	8	6	1888.21	2046.68	2085.25	2187.62	1940.69	2226.27	2242.14	2298.22	2075.38	2128.42	2160.81	2059.48	2004.87	2114.31	2203.18	2115.81	1.09892	0.28178	0.419003
Q9JLQ0	CD2-associated protein OS=Mus musculus OX=10090 GN=Cd2ap PE=1 SV=3	13	14	19	3598.69	3597.11	3635.16	3817.8	4002.01	3793.66	3808.3	3764.32	3718.06	3456.51	3317.86	3534.43	3610.27	3870.05	3763.38	3435.09	1.12662	0.0010285	0.0120132
Q99LJ5	CKLF-like MARVEL transmembrane domain-containing protein 3 OS=Mus musculus OX=10090 GN=Cmtm3 PE=2 SV=1	1	1	1	115.014	96.2975	104.769	99.7	123.983	110.842	93.463	102.982	113.843	120.429	105.343	99.1516	105.083	111.068	103.095	107.947	1.07734	0.810494	0.854623
Q8BLH7	HIRA-interacting protein 3 OS=Mus musculus OX=10090 GN=Hirip3 PE=1 SV=1	1	3	3	119.256	126.106	134.175	124.77	134.773	130.285	140.59	144.244	141.206	151.107	130.599	130.057	126.366	129.878	142.004	136.916	1.12376	0.121168	0.241313
Q9D662	Protein transport protein Sec23B OS=Mus musculus OX=10090 GN=Sec23b PE=1 SV=1	10	14	10	2102.07	2008.13	2065.56	1967.92	1985.55	2032.65	2105.75	2184.05	2015.29	2074.99	2072.99	2137.23	2058.22	1995.19	2100.56	2094.86	1.05281	0.13728	0.259282
Q9WVJ3	Carboxypeptidase Q OS=Mus musculus OX=10090 GN=Cpq PE=1 SV=1	10	8	5	1071.51	1128.46	1124.18	1153.59	1067.84	1177.91	1181.99	1262.26	1216.81	1194.29	1142.81	1082.47	1107.74	1132.11	1219.91	1138.94	1.10126	0.0965236	0.209141
Q9CQ92	Mitochondrial fission 1 protein OS=Mus musculus OX=10090 GN=Fis1 PE=1 SV=1	4	5	6	519.786	586.202	643.81	638.178	565.874	576.109	621.702	595.579	542.583	633.742	665.752	650.905	581.045	592.546	585.683	650.001	1.11868	0.277694	0.414941
P36552	Oxygen-dependent coproporphyrinogen-III oxidase, mitochondrial OS=Mus musculus OX=10090 GN=Cpox PE=1 SV=2	7	6	3	632.312	592.823	698.256	607.959	557.808	564.347	591.005	789.327	545.298	685.785	577.104	709.161	639.672	576.282	633.618	654.73	1.13613	0.609424	0.698957
P58774-2	Isoform 2 of Tropomyosin beta chain OS=Mus musculus OX=10090 GN=Tpm2	8	4	4	1879.9	1951.87	1842.03	1821.04	1671.83	1861.45	1649.76	1653.65	1598.54	1903.78	1977.13	1952.46	1890.72	1782.87	1633.79	1944.22	1.19001	0.00127006	0.0138101
Q922I7	MCG13402, isoform CRA_c OS=Mus musculus OX=10090 GN=Ptbp1 PE=1 SV=1	11	12	11	1465.02	1204.34	1289.45	1366.36	1542.86	1503.61	1449.27	1613.2	1668.97	1616.21	1536.46	1434.83	1315.22	1468.96	1574.33	1527.36	1.19701	0.08229	0.187839
P58742	Aladin OS=Mus musculus OX=10090 GN=Aaas PE=1 SV=1	3	4	3	341.342	314.543	325.989	311.491	332.326	308.018	287.843	312.643	323.42	349.809	330.973	333.058	327.108	317.099	307.603	337.843	1.09831	0.135436	0.257252
Q8CIE6	Coatomer subunit alpha OS=Mus musculus OX=10090 GN=Copa PE=1 SV=2	40	47	46	8780.31	8629.49	8634.32	8777.89	8810.5	8866.98	8602.98	9141.46	8689.79	8669.04	8248.77	8639.13	8681.09	8818.38	8808.28	8516.8	1.03541	0.259412	0.398781
P13020-2	Isoform 2 of Gelsolin OS=Mus musculus OX=10090 GN=Gsn	1	2	2	99.0327	114.763	108.046	109.775	88.6471	101.873	113.876	113.093	98.5486	108.19	114.37	122.405	107.085	99.7108	108.27	114.841	1.15174	0.298148	0.435461
Q9R0E2	Procollagen-lysine,2-oxoglutarate 5-dioxygenase 1 OS=Mus musculus OX=10090 GN=Plod1 PE=1 SV=1	16	18	19	2967.24	2919.93	2979.38	2878.54	3088.47	3121.52	2918.74	2967.42	2813.33	3158.06	2946.75	3008.34	2955.4	3027.57	2899.11	3036.43	1.04737	0.310146	0.447404
Q9D8S3	ADP-ribosylation factor GTPase-activating protein 3 OS=Mus musculus OX=10090 GN=Arfgap3 PE=1 SV=2	5	6	7	806.448	779.896	852.071	877.773	894.878	872.689	989.783	968.421	912.481	779.816	810.625	816.579	812.262	881.729	956.333	802.177	1.19217	0.00070268	0.00951073
P85094	Isochorismatase domain-containing protein 2A OS=Mus musculus OX=10090 GN=Isoc2a PE=1 SV=1	1	2	3	57.7151	59.4729	63.5556	68.9452	66.3752	67.9376	67.3385	68.5002	67.3246	69.6694	69.3199	64.8505	60.1987	67.7444	67.7189	67.9106	1.12811	0.00530632	0.0322371
P62960	Nuclease-sensitive element-binding protein 1 OS=Mus musculus OX=10090 GN=Ybx1 PE=1 SV=3	11	11	15	1640.98	1555.89	1516.17	1555.72	1703.33	1617	1836.65	1777.47	1887.58	1815.93	1812.59	1828.53	1570.16	1624.23	1833.35	1819	1.16762	0.000947346	0.0114071
E9PZP8	HECT and RLD domain-containing E3 ubiquitin protein ligase family member 1 OS=Mus musculus OX=10090 GN=Herc1 PE=1 SV=1	1		2	139.664		147.456	133.256		138.018	116.842		137.203	176.675		143.761	143.507	135.616	126.614	159.37	1.25871	0.244395	0.384917
P16546-2	Isoform 2 of Spectrin alpha chain, non-erythrocytic 1 OS=Mus musculus OX=10090 GN=Sptan1		1			19.9229			24.0169			23.4229			29.6208		19.9229	24.0169	23.4229	29.6208	1.48677
Q8K1R7	Serine/threonine-protein kinase Nek9 OS=Mus musculus OX=10090 GN=Nek9 PE=1 SV=2	2	4	4	460.074	426.533	427.681	470.602	465.689	431.118	443.655	471.956	488.49	413.734	423.888	440.777	437.824	455.458	467.664	425.988	1.09784	0.114115	0.231191
A2AFQ2	3-hydroxyacyl-CoA dehydrogenase type-2 OS=Mus musculus OX=10090 GN=Hsd17b10 PE=1 SV=1	17	16	20	3330	3170.19	3250.42	3395.9	3339.12	3459.61	3391.27	3468.85	3382.21	3285.29	3424.29	3310.22	3249.55	3397.85	3413.89	3339.39	1.05057	0.0602867	0.155009
P62737	Actin, aortic smooth muscle OS=Mus musculus OX=10090 GN=Acta2 PE=1 SV=1	22	22	22	17581	18145.3	18351	19079.9	18322.9	18555.4	19706.6	19159.6	18967	18229	18968.7	18723.2	18022.8	18650	19275.2	18637.7	1.06949	0.0273602	0.092382
Q6PIP5	NudC domain-containing protein 1 OS=Mus musculus OX=10090 GN=Nudcd1 PE=1 SV=2	12	13	15	2383.49	2395.01	2359.36	2235.47	2212.5	2365.26	2254.03	2367.87	2311.07	2433.16	2330.77	2270.47	2379.24	2270.09	2310.52	2343.84	1.04808	0.282371	0.419393
Q9WVJ2	26S proteasome non-ATPase regulatory subunit 13 OS=Mus musculus OX=10090 GN=Psmd13 PE=1 SV=1	19	16	22	4751.81	4684.95	4768.18	4676.93	4681.14	4673.67	4551.02	4708.7	4606.69	4681.99	4586.96	4613.22	4734.84	4677.24	4621.68	4627.22	1.02449	0.0914453	0.201573
P24788	Cyclin-dependent kinase 11B OS=Mus musculus OX=10090 GN=Cdk11b PE=1 SV=2	5	5	3	907.797	957.986	914.245	876.232	806.512	845.338	861.069	814.757	896.123	869.783	935.626	859.175	926.41	842.209	856.665	887.561	1.09998	0.0920016	0.202507
Q91VA6	Polymerase delta-interacting protein 2 OS=Mus musculus OX=10090 GN=Poldip2 PE=1 SV=1	5	2	6	444.083	394.024	443.545	420.472	462.14	410.347	397.119	433.514	401.692	416.39	388.385	422.48	426.555	430.415	410.461	408.811	1.05285	0.610569	0.699072
Q3U1J4	DNA damage-binding protein 1 OS=Mus musculus OX=10090 GN=Ddb1 PE=1 SV=2	32	39	35	8882.03	8997.91	9143.99	8426.25	8625.43	8528.93	7868.74	7795.2	7785.01	9132.04	8890.52	8851.14	9007.34	8526.48	7816.23	8957.05	1.15239	2.9913e-06	0.000389202
E9Q0A7	Oxidation resistance protein 1 OS=Mus musculus OX=10090 GN=Oxr1 PE=1 SV=1		23	30		3786.79	3671.58		3491.58	3748.72		3669.9	3594.94		3694.23	3627.28	3728.74	3617.87	3632.23	3660.6	1.03065	0.746369	0.805342
O09106	Histone deacetylase 1 OS=Mus musculus OX=10090 GN=Hdac1 PE=1 SV=1	5	6	7	1519.19	1333.88	1443.29	1451.88	1669.27	1561.13	1540.64	1534.49	1517.76	1554.07	1528.14	1543.6	1430.08	1558.23	1530.93	1541.9	1.08961	0.199767	0.333757
P99027	60S acidic ribosomal protein P2 OS=Mus musculus OX=10090 GN=Rplp2 PE=1 SV=3	9	8	10	5110.48	4471.74	4702.61	4755.54	5383.39	4865.54	5335.5	5646.44	5503.03	5305.88	5005.84	5436.22	4754.37	4994.16	5493.52	5246.19	1.15547	0.0503656	0.13788
Q9D3D0	Alpha-tocopherol transfer protein-like OS=Mus musculus OX=10090 GN=Ttpal PE=1 SV=3	2	2	1	72.9558	65.6449	23.6433	74.1147	66.0199	73.6071	69.9545	70.0151	98.9229	66.8448	82.1899	87.6965	48.379	71.1486	78.5419	78.3952	1.62347	0.309348	0.446529
Q8BH04	Phosphoenolpyruvate carboxykinase [GTP], mitochondrial OS=Mus musculus OX=10090 GN=Pck2 PE=1 SV=1	34	37	30	8064.95	8107.51	7917.08	7491.99	7420.12	7479.81	7218.48	7403.81	7451.14	7828.59	7672.57	7755.96	8029.43	7463.91	7357.12	7752.11	1.09138	7.55855e-05	0.00260325
Q9WTX5	S-phase kinase-associated protein 1 OS=Mus musculus OX=10090 GN=Skp1 PE=1 SV=3	8	11	19	2569.32	2693.19	2675.08	2911.07	2875.27	2904.9	3030.73	3004.01	2820.09	2561.27	2499.93	2672.33	2645.29	2897.04	2950.1	2576.86	1.14484	0.00101464	0.0119712
Q6ZWQ9	MCG5400 OS=Mus musculus OX=10090 GN=Myl12a PE=1 SV=1	5	20	5	1936.28	1772.66	1756.33	1722.17	1896.68	1945.34	1801.86	1774.56	1848.91	1852.7	1869.12	1762.44	1819.98	1852.2	1808.18	1827.48	1.02435	0.929155	0.944889
Q9DB73	NADH-cytochrome b5 reductase 1 OS=Mus musculus OX=10090 GN=Cyb5r1 PE=1 SV=1	5	6	6	854.72	861.454	853.251	845.246	828.322	896.189	817.579	863.85	863.704	962.558	926.477	866.958	856.468	856.105	848.095	917.811	1.0822	0.100572	0.213642
Q8C5H8	NAD kinase 2, mitochondrial OS=Mus musculus OX=10090 GN=Nadk2 PE=1 SV=2	6	13	11	1880.81	1945.46	1859.02	1616.89	1635.96	1789.91	1865.3	1893.22	1817.03	1903.27	1791.64	1800.31	1894.75	1679.17	1858.25	1831.05	1.12838	0.0151315	0.0621175
Q9WUQ2	Prolactin regulatory element-binding protein OS=Mus musculus OX=10090 GN=Preb PE=1 SV=1	1	4	3	226.84	205.264	213.346	197.937	244.944	196.045	205.851	208.692	218.521	230.802	202.53	233.518	214.967	211.828	210.952	221.828	1.05156	0.863855	0.895198
Q91ZX7	Prolow-density lipoprotein receptor-related protein 1 OS=Mus musculus OX=10090 GN=Lrp1 PE=1 SV=1	61	63	60	13413.6	13187.7	13520.9	13743.9	14002.1	13319.4	12100.2	12463.4	12420.7	13766.3	13370.7	13762.9	13373.3	13685.6	12327	13632	1.11021	0.000359897	0.00678108
P40124	Adenylyl cyclase-associated protein 1 OS=Mus musculus OX=10090 GN=Cap1 PE=1 SV=4	30	34	32	6041.7	6289.18	6379.25	6139.02	6011.32	6033.61	6093.49	6029.85	5919.72	6452.41	6396.26	6394.03	6235.06	6061.06	6013.93	6414.18	1.06655	0.00630319	0.0358738
P35564	Calnexin OS=Mus musculus OX=10090 GN=Canx PE=1 SV=1	22	22	27	9013.5	8937.81	8679.42	7729.51	8155.33	8528.36	7948.15	8018.67	8158.16	9350.91	8930.26	8676.12	8875.75	8131.17	8041.19	8981.48	1.11693	0.00605844	0.0349911
Q8VDS4	Regulation of nuclear pre-mRNA domain-containing protein 1A OS=Mus musculus OX=10090 GN=Rprd1a PE=1 SV=1	3	2	2	333.511	338.861	361.709	334.087	342.514	313.133	311.664	306.718	311.908	343.733	334.901	336.244	344.48	329.677	310.087	338.27	1.11091	0.0198933	0.0747834
P50429	Arylsulfatase B OS=Mus musculus OX=10090 GN=Arsb PE=1 SV=3	3	6	4	571.367	631.411	659.656	697.338	646.273	655.904	646.463	620.243	632.904	679.69	696.932	646.394	619.7	666.142	633.113	674.01	1.08764	0.170005	0.301402
Q921F2	TAR DNA-binding protein 43 OS=Mus musculus OX=10090 GN=Tardbp PE=1 SV=1	5	10	7	1001.31	838.458	934.603	981.275	1099.49	1047.13	1102.61	1089.39	1125.32	991.494	1049.36	969.63	922.342	1041.5	1105.67	1002.94	1.19877	0.0271571	0.0919769
Q9WUL7	ADP-ribosylation factor-like protein 3 OS=Mus musculus OX=10090 GN=Arl3 PE=1 SV=1	11	14	15	2027.3	2032.15	2125.65	2035.18	2016.38	2015.4	2001.66	2084.52	2035.52	2161.23	2092.33	2048.81	2061.21	2022.3	2040.28	2100.28	1.03856	0.246799	0.386625
Q640N1	Adipocyte enhancer-binding protein 1 OS=Mus musculus OX=10090 GN=Aebp1 PE=1 SV=1	3	3	4	309.61	282.446	301.257	311.042	300.358	302.905	305.902	310.055	314.814	322.648	356.342	330.227	297.552	304.735	310.236	336.101	1.12955	0.018071	0.070655
Q6A026	Sister chromatid cohesion protein PDS5 homolog A OS=Mus musculus OX=10090 GN=Pds5a PE=1 SV=3	7	7	6	825.997	758.607	779.097	813.81	817.752	807.482	761.522	797.98	834.604	817.768	844.757	797.912	787.401	813.004	797.477	819.922	1.0413	0.512932	0.622005
Q8VHC3	Selenoprotein M OS=Mus musculus OX=10090 GN=Selenom PE=1 SV=3	1	2	1	61.34	62.1303	61.2002	62.1771	62.5884	61.2714	66.2854	66.1038	51.446	62.8291	61.809	78.714	61.5555	62.0099	60.86	67.363	1.10685	0.603596	0.693811
Q60520	Paired amphipathic helix protein Sin3a OS=Mus musculus OX=10090 GN=Sin3a PE=1 SV=3	6	3	4	368.248	359.283	341.91	363.915	308.696	362.806	339.019	365.913	357.108	331.699	368.989	341.057	356.311	344.14	353.835	346.892	1.03537	0.883004	0.909009
Q9CQG2	U6 small nuclear RNA (adenine-(43)-N(6))-methyltransferase OS=Mus musculus OX=10090 GN=Mettl16 PE=1 SV=1	2	1	3	191.501	187.651	190.335	167.478	167.726	160.455	184.766	188.824	178.353	185.967	185.51	200.568	189.822	165.185	183.93	190.556	1.15359	0.00116466	0.0131321
P17427	AP-2 complex subunit alpha-2 OS=Mus musculus OX=10090 GN=Ap2a2 PE=1 SV=2	30	33	32	6617.17	6358.65	6375.36	6657.77	6602.31	6575.68	6662.2	6839.45	6815.95	6400.33	6537.06	6570.48	6449.32	6611.83	6772.08	6502.2	1.05004	0.0193848	0.0736351
Q8VCH8	UBX domain-containing protein 4 OS=Mus musculus OX=10090 GN=Ubxn4 PE=1 SV=1	3	4	8	678.836	686.74	700.285	670.641	666.18	676.582	692.016	677.597	657.14	660.679	671.655	668.166	688.563	671.121	675.432	666.818	1.03261	0.167445	0.297878
Q8R404	MICOS complex subunit MIC13 OS=Mus musculus OX=10090 GN=Mic13 PE=1 SV=1	3		1	155.753		131.569	125.032		133.41	127.049		139.556	138.882		142.181	143.151	129.153	133.156	140.522	1.10839	0.530627	0.63614
Q792Z1	MCG140784 OS=Mus musculus OX=10090 GN=Try10 PE=1 SV=1	5	5	3	846.229	936.844	834.857	906.558	769.169	902.569	930.79	990.292	1012.49	923.794	911.065	857.459	871.477	856.971	977.24	896.973	1.14034	0.131262	0.251465
A0A0J9YUD5	Nucleoporin 205 OS=Mus musculus OX=10090 GN=Nup205 PE=1 SV=1	8	5	3	541.507	497.892	503.92	467.944	499.047	494.25	456.859	488.7	519.475	559.533	540.205	508.197	514.083	486.886	487.674	535.557	1.09996	0.125596	0.245941
Q3UM45	Protein phosphatase 1 regulatory subunit 7 OS=Mus musculus OX=10090 GN=Ppp1r7 PE=1 SV=2	15	14	17	1821.73	1946.16	1997.71	1909.59	1945.83	1916.57	2092.13	1943.78	1890.12	2017.34	2005.01	2036.39	1920.43	1923.93	1973.52	2019.54	1.05161	0.334514	0.471663
Q8CEC0	Nuclear pore complex protein Nup88 OS=Mus musculus OX=10090 GN=Nup88 PE=1 SV=1	2	1	3	298.504	254.818	267.511	252.052	256.98	271.587	269.865	259.292	274.397	250.251	299.582	257.177	273.007	260.076	267.776	268.148	1.04972	0.849425	0.884747
Q80Y56	Rabenosyn-5 OS=Mus musculus OX=10090 GN=Rbsn PE=1 SV=1	3	1	2	70.848	91.3953	80.7366	85.4536	87.9062	74.0764	78.3469	61.521	78.1962	80.5637	74.3897	82.2031	80.5577	82.2514	72.2343	78.9793	1.13867	0.509899	0.620028
E9Q555	E3 ubiquitin-protein ligase RNF213 OS=Mus musculus OX=10090 GN=Rnf213 PE=1 SV=2	39	46	59	6357.17	5857.94	6176.42	6556.5	6811.35	6509.03	6917.23	7020.76	7159.88	6590.36	6731.21	6575.94	6127.01	6624.31	7031.92	6632.13	1.14769	0.00158368	0.0153688
P40630	Transcription factor A, mitochondrial OS=Mus musculus OX=10090 GN=Tfam PE=1 SV=2	3	1	2	638.83	559.184	621.635	648.875	658.489	656.41	686.713	739.89	709.53	599.659	616.515	586.501	605.562	654.578	711.712	600.766	1.18467	0.00356274	0.0251324
Q3UH93	Plexin-D1 OS=Mus musculus OX=10090 GN=Plxnd1 PE=1 SV=1	1	2	2	53.1308	54.8873	51.435	64.4483	53.098	47.0597	51.1714	48.2585	59.4056	49.3562	61.8629	60.2064	53.1324	54.4059	52.7403	56.8597	1.07811	0.851814	0.88625
Q5ND34	WD repeat-containing protein 81 OS=Mus musculus OX=10090 GN=Wdr81 PE=1 SV=2	4	5	2	213.491	211.468	171.732	228.548	209.279	254.887	214.722	231.892	270.194	199.515	203.637	159.463	197.921	230.153	237.837	186.422	1.2758	0.101923	0.215733
P43406	Integrin alpha-V OS=Mus musculus OX=10090 GN=Itgav PE=1 SV=2	19	34	30	5080.96	5010.49	5251.94	5182.51	5231.13	5238.78	5021.12	5173.86	4929.66	5538.72	5407.83	5402.93	5113.46	5217.42	5040.54	5449.46	1.08113	0.00470152	0.0300435
P48453	Serine/threonine-protein phosphatase 2B catalytic subunit beta isoform OS=Mus musculus OX=10090 GN=Ppp3cb PE=1 SV=2	1	2	3	187.392	199.029	194.746	174.331	177.914	179.764	189.608	180.356	179.625	210.684	204.715	207.879	193.662	177.322	183.141	207.745	1.17157	0.000196489	0.00464826
Q9JIK9	28S ribosomal protein S34, mitochondrial OS=Mus musculus OX=10090 GN=Mrps34 PE=1 SV=1	2	3	2	150.959	138.266	140.702	118.19	152.124	135.96	148.718	148.916	131.059	166.328	144.888	176.473	143.205	134.709	142.645	162.016	1.20271	0.172219	0.304489
G3UZV6	Microtubule-associated protein (Fragment) OS=Mus musculus OX=10090 GN=Map2 PE=1 SV=1	2	1	2	386.515	305.407	326.412	330.939	438.176	441.143	364.375	400.645	428.414	417.935	355.537	303.796	337.757	399.937	396.939	356.062	1.1841	0.395672	0.525497
Q3UHA3	Spatacsin OS=Mus musculus OX=10090 GN=Spg11 PE=1 SV=3	4	3	5	454.596	452.009	446.554	468.773	465.91	445.867	375.74	421.114	420.98	484.044	444.12	469.752	451.04	460.07	405.368	465.677	1.14877	0.0134657	0.0576119
Q62245	Son of sevenless homolog 1 OS=Mus musculus OX=10090 GN=Sos1 PE=1 SV=2	3	3	8	609.288	627.255	656.315	648.444	606.997	631.781	715.836	673.409	634.866	581.213	647.12	631.819	630.657	628.843	673.894	619.4	1.08798	0.222603	0.35993
Q9CZ44	NSFL1 cofactor p47 OS=Mus musculus OX=10090 GN=Nsfl1c PE=1 SV=1	14	13	18	2825.57	2874.3	2843.52	2662.29	2704.97	2723.71	2735.98	2713.99	2748.3	3014.8	2945.37	2923.1	2847.73	2696.87	2732.72	2960.84	1.09788	3.03314e-05	0.00157858
E9QL65	Conserved oligomeric Golgi complex subunit 3 OS=Mus musculus OX=10090 GN=Cog3 PE=1 SV=1	8	6	6	777.472	798.668	771.382	869.436	836.011	841.223	820.457	826.919	833.363	779.195	784.963	800.593	782.42	848.764	826.896	788.199	1.08479	0.000696661	0.00945844
Q3V3R1	Monofunctional C1-tetrahydrofolate synthase, mitochondrial OS=Mus musculus OX=10090 GN=Mthfd1l PE=1 SV=2	25	37	34	7174	6922.86	6757.36	6615.59	6893.89	6793.5	6567.01	6596.23	6719.94	6712.98	6656.59	6798.78	6949.3	6766.68	6627.4	6722.53	1.04857	0.0980914	0.210665
Q8K0U4	Heat shock 70 kDa protein 12A OS=Mus musculus OX=10090 GN=Hspa12a PE=1 SV=1	11	12	11	1537.13	1525.76	1512.43	1615.87	1608.61	1628.74	1592.66	1609.47	1597.62	1501.72	1503.54	1508.59	1525.07	1617.72	1599.9	1504.62	1.07517	8.27437e-07	0.000225547
Q91WE2	Protein FAM192A OS=Mus musculus OX=10090 GN=Fam192a PE=1 SV=1	2	6	2	883.822	889.796	890.571	849.339	892.676	960.135	946.282	967.526	908.33	954.708	884.153	875.116	888.058	899.572	940.392	903.971	1.05893	0.429973	0.554208
O70405	Serine/threonine-protein kinase ULK1 OS=Mus musculus OX=10090 GN=Ulk1 PE=1 SV=1	1	1		34.8205	37.1218		30.5276	29.0146		33.9275	32.9717		36.3464	36.5138		35.9528	29.7615	33.4462	36.43	1.22406	0.00849564	0.0431133
Q8CFE3	REST corepressor 1 OS=Mus musculus OX=10090 GN=Rcor1 PE=1 SV=3	4	3	4	403.398	360.592	365.16	348.978	398.112	357.963	385.422	386.276	416.494	387.09	379.907	385.27	375.905	367.745	395.805	384.077	1.0763	0.402739	0.531688
Q76MZ3	Serine/threonine-protein phosphatase 2A 65 kDa regulatory subunit A alpha isoform OS=Mus musculus OX=10090 GN=Ppp2r1a PE=1 SV=3	37	35	40	7956.49	7962.93	8091.39	8043.7	8057.68	7743.47	7583.22	7871.99	7546.07	8099.87	7790.68	8302.36	8003.36	7946.95	7665.72	8061.54	1.05164	0.110146	0.226482
Q60676	Serine/threonine-protein phosphatase 5 OS=Mus musculus OX=10090 GN=Ppp5c PE=1 SV=3	5	6	11	902.572	991.464	986.709	1015.33	922.669	986.956	1001.58	1014.17	989.709	991.158	982.328	947.259	959.362	974.203	1001.77	973.396	1.0442	0.599109	0.690715
P50285	Dimethylaniline monooxygenase [N-oxide-forming] 1 OS=Mus musculus OX=10090 GN=Fmo1 PE=1 SV=1	1	4	4	115.842	142.681	155.457	264.253	149.104	152.211	94.0595	165.415	151.737	128.369	145.324	143.119	136.966	181.685	133.155	138.728	1.36447	0.397384	0.526696
P35922	Synaptic functional regulator FMR1 OS=Mus musculus OX=10090 GN=Fmr1 PE=1 SV=1	4	7	7	763.771	632.096	723.769	663.719	853.478	712.336	778.194	831.191	808.41	777.724	666.644	738.892	704.339	738.96	805.638	726.274	1.14382	0.374612	0.507426
Q91VW5	Golgin subfamily A member 4 OS=Mus musculus OX=10090 GN=Golga4 PE=1 SV=2	8	16	9	1839.78	1775.71	1808.5	1771.52	1885.18	1774.61	1898.5	1847.9	1842.45	1747.98	1748.98	1832.23	1807.81	1809.67	1862.78	1775.96	1.04889	0.221247	0.358465
Q14AI0	Sister chromatid cohesion protein DCC1 OS=Mus musculus OX=10090 GN=DSCC1 PE=2 SV=1		4	1		65.9986	74.6138		72.2343	65.2304		70.6052	62.7868		61.1956	67.4027	70.1742	68.6431	66.5814	64.2242	1.09264	0.70931	0.776263
Q6QI06	Rapamycin-insensitive companion of mTOR OS=Mus musculus OX=10090 GN=Rictor PE=1 SV=2	5	6	5	991.274	993.846	1046.35	1120.13	1088.98	1120	1093.19	1111.5	1063.62	1003.59	1013.85	978.21	1010.18	1109.61	1089.26	998.437	1.11134	0.000849631	0.0106091
Q9Z0X1	Apoptosis-inducing factor 1, mitochondrial OS=Mus musculus OX=10090 GN=Aifm1 PE=1 SV=1	14	19	18	4613.99	4439.94	4532.05	4681.12	4786.12	4623.8	4562.82	4518.23	4649.65	4533.68	4647.32	4586.1	4528.1	4696.53	4576.57	4588.8	1.0372	0.114171	0.231204
Q9EPK7	Exportin-7 OS=Mus musculus OX=10090 GN=Xpo7 PE=1 SV=3	15	15	9	1553.17	1533.36	1634.62	1649.24	1642.81	1571.87	1671.41	1654.06	1689.48	1515.95	1559.53	1493.79	1573.11	1620.92	1671.59	1522.85	1.09767	0.00915026	0.0447895
Q91WE1	Sorting nexin-15 OS=Mus musculus OX=10090 GN=Snx15 PE=1 SV=1	4	3	3	139.616	140.889	134.589	127.554	131.235	162.553	137.546	140.271	123.84	145.891	138.213	129.627	138.338	139.609	133.688	137.75	1.04429	0.919218	0.937635
Q99KJ8	Dynactin subunit 2 OS=Mus musculus OX=10090 GN=Dctn2 PE=1 SV=3	24	26	22	4276.94	4385.66	4481.81	4523.31	4493.46	4423.96	4572.54	4441.13	4377.81	4482.41	4534.94	4571.62	4380.67	4480.05	4463.09	4529.51	1.03398	0.219885	0.356875
Q02013	Aquaporin-1 OS=Mus musculus OX=10090 GN=Aqp1 PE=1 SV=3	2	2	2	294.315	287.983	311.312	351.097	347.993	293.608	363.521	328.738	350.486	286.867	331.087	340.395	297.709	329.803	347.283	318.568	1.16652	0.165973	0.296072
Q9R1Q8	Transgelin-3 OS=Mus musculus OX=10090 GN=Tagln3 PE=1 SV=1	1		1	24.0156		34.3382	44.7787		37.5579	49.4757		46.2069	38.5668		38.7338	28.7168	41.0097	47.8134	38.6502	1.665	0.0906594	0.200581
P55096	ATP-binding cassette sub-family D member 3 OS=Mus musculus OX=10090 GN=Abcd3 PE=1 SV=2	4	2	4	229.957	185.467	237.973	198.391	215.068	202.651	198.485	198.75	179.055	192.216	219.765	199.37	216.511	205.249	191.87	203.456	1.12843	0.427576	0.552183
P97311	DNA replication licensing factor MCM6 OS=Mus musculus OX=10090 GN=Mcm6 PE=1 SV=1	29	37	41	8638.27	8661.54	8537.76	8823.41	8447.92	8755.42	8671.03	8864.47	8688.98	9036.82	9195.59	9187.37	8612.35	8674.03	8741.06	9139.63	1.06122	0.00414554	0.027726
Q6PD03	Serine/threonine-protein phosphatase 2A 56 kDa regulatory subunit alpha isoform OS=Mus musculus OX=10090 GN=Ppp2r5a PE=1 SV=1		2	4		444.209	462.883		476.842	461.428		518.495	487.706		464.867	492.396	453.45	469.071	502.865	478.433	1.10898	0.155288	0.282692
Q7TPE5	Probable RNA polymerase II nuclear localization protein SLC7A6OS OS=Mus musculus OX=10090 GN=Slc7a6os PE=1 SV=1	2	3	4	384.294	364.899	347.412	399.517	361.077	396.619	389.768	406.312	421.95	347.4	388.691	354.998	365.225	385.333	405.797	363.262	1.11709	0.0959745	0.208575
P30285	Cyclin-dependent kinase 4 OS=Mus musculus OX=10090 GN=Cdk4 PE=1 SV=1	6	6	11	1195.45	1228.62	1172.41	1275.71	1193.3	1252.43	1185.51	1316.67	1274.54	1239.19	1157.28	1196.49	1198.61	1239.99	1257.71	1197.19	1.05055	0.349668	0.486008
Q8VE47	Ubiquitin-like modifier-activating enzyme 5 OS=Mus musculus OX=10090 GN=Uba5 PE=1 SV=2	5	5	10	828.313	798.183	750.665	750.326	765.231	754.73	709.167	742.114	794.35	819.214	801.492	807.274	791.737	756.736	747.728	809.293	1.08234	0.10824	0.223927
Q3U4G3	Xyloside xylosyltransferase 1 OS=Mus musculus OX=10090 GN=Xxylt1 PE=1 SV=2	4	6	2	303.854	274.303	289.253	276.442	307.388	334.475	317.609	309.12	267.453	275.332	282.427	282.056	288.885	305.177	297.228	279.919	1.09023	0.523416	0.630431
Q8BGQ1	Spermatogenesis-defective protein 39 homolog OS=Mus musculus OX=10090 GN=Vipas39 PE=1 SV=1	3	3	5	262.106	255.006	249.02	274.436	283.051	289.198	288.766	277.622	285.831	237.154	246.783	238.413	255.322	282.163	284.033	240.745	1.17981	6.24571e-05	0.00226782
Q8CG48	Structural maintenance of chromosomes protein 2 OS=Mus musculus OX=10090 GN=Smc2 PE=1 SV=2	39	43	42	8403.99	7865.55	7985.83	8360.08	8855.27	8475.27	7978.71	8193.05	8263.08	8132.83	7961.74	8151.42	8081.87	8560.95	8144.04	8081.55	1.05932	0.0676608	0.165818
Q8K1J6	CCA tRNA nucleotidyltransferase 1, mitochondrial OS=Mus musculus OX=10090 GN=Trnt1 PE=1 SV=1	7	12	12	2361.65	2412.68	2505.64	2529.09	2389.78	2395.04	2559.6	2499.69	2438.96	2297.98	2446.18	2408.69	2425.93	2437.13	2498.93	2383.44	1.04846	0.345008	0.481675
E9Q137	Testis-expressed gene 264 OS=Mus musculus OX=10090 GN=Tex264 PE=1 SV=1	2	2		315.594	381.122		415.533	349.484		419.527	378.693		324.48	365.835		346.814	381.081	398.587	344.537	1.15688	0.511443	0.620944
Q8C3Y4	Kinetochore-associated protein 1 OS=Mus musculus OX=10090 GN=Kntc1 PE=1 SV=2	14	10	12	1274.31	1276.98	1272.54	1397.9	1325.17	1349.01	1222.5	1293.6	1251.23	1229.67	1228.65	1251.6	1274.61	1357.03	1255.44	1236.59	1.09739	0.00245525	0.0199313
Q8BG05	Heterogeneous nuclear ribonucleoprotein A3 OS=Mus musculus OX=10090 GN=Hnrnpa3 PE=1 SV=1	4	4	6	705.183	699.748	666.691	671.206	728.488	767.935	852.485	759.85	864.028	820.513	861.302	750.734	690.329	721.441	824.102	809.547	1.19378	0.0204202	0.0760924
A2AKU9	ATP synthase subunit gamma OS=Mus musculus OX=10090 GN=Atp5c1 PE=1 SV=1	12	10	10	3472.69	3469.55	3434.26	3102.89	3252.03	3150.14	3147.07	2844.86	2958.04	3156.3	3312.52	3336.52	3458.79	3167.74	2980.74	3267.46	1.16038	0.00307665	0.0231116
Q9DB05	Alpha-soluble NSF attachment protein OS=Mus musculus OX=10090 GN=Napa PE=1 SV=1	10	12	9	1876.74	1894.55	1911.56	1985.25	1970.3	2024.1	1987.71	1961.15	1949.92	1965.05	1988.74	1929.16	1894.23	1993.09	1966.2	1960.83	1.05219	0.00561125	0.0334391
Q8CC12	Codanin-1 OS=Mus musculus OX=10090 GN=Cdan1 PE=1 SV=2	4	2	1	48.4014	47.2652	40.4934	43.2963	43.8316	33.162	37.1048	38.0128	54.6491	43.7471	43.44	44.2451	45.2475	39.7765	42.558	43.8095	1.13754	0.728427	0.791101
D3YZZ5	Transmembrane p24-trafficking protein 7 OS=Mus musculus OX=10090 GN=Tmed7 PE=1 SV=1	2	3	2	617.169	651.525	649.447	672.535	646.714	638.634	664.285	623.725	652.771	607.491	639.516	620.627	639.185	652.469	646.7	622.406	1.0483	0.288718	0.425939
O08738	Caspase-6 OS=Mus musculus OX=10090 GN=Casp6 PE=1 SV=1	1	3	3	236.933	260.751	228.727	261.724	230.015	274.911	247.819	246.875	233.444	238.569	247.404	247.963	241.763	254.838	242.623	244.607	1.05408	0.703333	0.771156
Q9D8X2	Coiled-coil domain-containing protein 124 OS=Mus musculus OX=10090 GN=Ccdc124 PE=1 SV=1	6	5	4	436.901	378.002	420.294	378.092	451.23	393.623	479.003	406.94	418.76	382.631	440.455	443.95	410.97	406.467	433.788	421.378	1.06722	0.79128	0.840845
Q8K2D3	Enhancer of mRNA-decapping protein 3 OS=Mus musculus OX=10090 GN=Edc3 PE=1 SV=1	2	1	3	148.673	146.271	151.32	142.686	139.666	139.177	143.495	143.381	160.266	161.489	167.024	145.581	148.74	140.501	148.841	157.764	1.12287	0.110894	0.227296
P61021	Ras-related protein Rab-5B OS=Mus musculus OX=10090 GN=Rab5b PE=1 SV=1	10	7	13	1356.34	1275.42	1352.58	1294.26	1358.64	1296.29	1413.76	1503.21	1351.48	1367.21	1294.3	1431.22	1327.58	1316.06	1421.46	1363.09	1.08009	0.199658	0.333757
Q9Z0E0	Neurochondrin OS=Mus musculus OX=10090 GN=Ncdn PE=1 SV=1	3	1	4	361.799	368.035	346.803	396.814	333.018	345.104	332.553	393.519	377.203	340.732	337.327	362.788	358.767	357.274	366.832	346.768	1.05786	0.795448	0.84375
Q91X43	SH3 domain-containing protein 19 OS=Mus musculus OX=10090 GN=Sh3d19 PE=1 SV=2	3	4	5	359.835	348.978	364.344	352.548	354.819	359.307	328.466	341.105	332.227	363.096	359.044	348.068	357.66	355.547	333.891	356.679	1.07119	0.00588691	0.0342964
O35841	Apoptosis inhibitor 5 OS=Mus musculus OX=10090 GN=Api5 PE=1 SV=2	11	13	12	1932.13	1689.05	1816.92	1655.46	1917.6	1827.23	1814.03	1918.93	1919.13	2030.78	1906.82	1869.12	1809.97	1796.76	1883.37	1934.36	1.07658	0.402593	0.531646
Q9D0K0	TBC1 domain family member 7 OS=Mus musculus OX=10090 GN=Tbc1d7 PE=1 SV=1	2	3	1	143.883	140.734	156.246	136.28	136.876	189.272	133.625	150.874	125.55	164.091	149.396	106.811	146.805	152.27	136.282	137.831	1.11732	0.798563	0.846068
Q9CZX7	Type 2 phosphatidylinositol 4,5-bisphosphate 4-phosphatase OS=Mus musculus OX=10090 GN=Pip4p2 PE=1 SV=1	4	3		172.946	155.742		160.633	167.836		159.262	158.859		160.808	171.212		164.119	164.195	159.06	165.928	1.04318	0.813567	0.856013
Q8C079	Striatin-interacting protein 1 OS=Mus musculus OX=10090 GN=Strip1 PE=1 SV=2	2	7	4	411.85	413.382	414.09	384.236	414.741	376.573	383.201	383.176	400.821	428.623	396.613	416.426	413.106	391.509	388.978	413.676	1.06349	0.110277	0.22665
Q7TMY8	E3 ubiquitin-protein ligase HUWE1 OS=Mus musculus OX=10090 GN=Huwe1 PE=1 SV=5	35	50	40	5674.07	5787.28	5524.99	5510.12	5419.83	5457.59	5132.13	5103.04	5321.68	5514.45	5520.61	5526.5	5661.09	5462.39	5184.72	5520.52	1.09188	0.00133345	0.0140705
Q60751	Insulin-like growth factor 1 receptor OS=Mus musculus OX=10090 GN=Igf1r PE=1 SV=3	5	4	1	269.863	260.621	264.189	259.863	248.817	262.965	258.798	258.209	280.89	265.576	286.454	246.058	264.864	257.143	265.76	265.518	1.03351	0.807022	0.852523
Q8CFD4	Sorting nexin-8 OS=Mus musculus OX=10090 GN=Snx8 PE=1 SV=1	3	6	7	739.773	695.455	706.558	732.11	761.169	759.345	747.247	748.539	750.575	714.295	728.264	716.948	713.682	750.756	748.786	719.81	1.05195	0.0287801	0.0950006
Q8BX94	Oxysterol-binding protein-related protein 2 OS=Mus musculus OX=10090 GN=Osbpl2 PE=1 SV=1	1	4	3	167.534	213.377	183.687	224.882	194.123	214.429	223.427	195.75	206.319	171.604	184.198	183.012	187.259	210.752	208.19	179.514	1.17402	0.106905	0.22275
Q8C0E2	Vacuolar protein sorting-associated protein 26B OS=Mus musculus OX=10090 GN=Vps26b PE=1 SV=1	5	7	3	675.402	672.549	694.457	637.949	617.72	652.453	640.523	639.417	594.496	625.773	649.961	638.242	680.734	635.881	624.438	637.916	1.09015	0.0264525	0.0903181
Q8BKT3	GC-rich sequence DNA-binding factor 2 OS=Mus musculus OX=10090 GN=Gcfc2 PE=1 SV=2		2	3		141.058	136.841		136.722	136.316		138.262	138.219		138.027	142.694	138.933	136.519	138.241	140.341	1.028	0.46696	0.584667
Q80WC7	Arf-GAP domain and FG repeat-containing protein 2 OS=Mus musculus OX=10090 GN=Agfg2 PE=1 SV=1	5	7	4	576.155	600.946	581.866	524.36	570.654	556.334	613.724	584.269	559.775	612.539	570.91	628.803	586.227	550.106	585.509	603.585	1.09722	0.122527	0.242464
Q8C3W1	Uncharacterized protein C1orf198 homolog OS=Mus musculus OX=10090 PE=1 SV=1	6	4	8	790.205	800.326	767.781	791.838	945.094	882.488	1022.8	870.059	925.236	796.319	785.68	825.653	785.986	870.843	937.267	802.374	1.19247	0.0310576	0.0992995
Q9Z0H7	B-cell lymphoma/leukemia 10 OS=Mus musculus OX=10090 GN=Bcl10 PE=1 SV=1	1	2	3	290.06	295.172	281.742	260.843	253.259	292.196	267.569	265.788	261.258	289.812	294.064	273.087	288.938	268.25	264.858	285.509	1.09092	0.102563	0.2164
Q8CIB5	Fermitin family homolog 2 OS=Mus musculus OX=10090 GN=Fermt2 PE=1 SV=1	23	21	19	2920.73	2975.77	2791.38	3138.43	2982.37	3233.39	3056.58	3102.24	3142.46	2865.22	2920.58	2813.73	2894.92	3116.33	3100.23	2866.18	1.08728	0.0120225	0.0532766
Q04447	Creatine kinase B-type OS=Mus musculus OX=10090 GN=Ckb PE=1 SV=1	1	1		22.3489	17.501		18.9777	20.0743		15.396	15.854		18.2074	21.5007		19.7769	19.5183	15.6233	19.7856	1.26642	0.214858	0.352379
P97376	Protein FRG1 OS=Mus musculus OX=10090 GN=Frg1 PE=1 SV=2	2	2	1	221.915	220.295	194.619	240.799	234.081	230.047	194.381	228.978	246.054	257.893	231.633	244.267	211.897	234.934	222.071	244.363	1.15321	0.191748	0.325575
Q2KN98	Cytospin-A OS=Mus musculus OX=10090 GN=Specc1l PE=1 SV=1	2	2	1	76.5166	69.4854	51.7841	62.2621	69.0705	73.019	59.478	59.1541	65.2117	68.7797	69.3264	77.0216	65.0552	67.97	61.2194	71.6128	1.16977	0.454033	0.573387
Q921W4	Quinone oxidoreductase-like protein 1 OS=Mus musculus OX=10090 GN=Cryzl1 PE=1 SV=1	3	3	5	611.941	557.981	600.18	584.35	596.575	594.563	539.815	600.251	546.77	616.014	597.311	610.607	589.572	591.805	561.643	607.926	1.08241	0.173659	0.305491
Q80W68	Kin of IRRE-like protein 1 OS=Mus musculus OX=10090 GN=Kirrel1 PE=1 SV=1	4	5	3	355.498	341.757	355.842	356.484	349.623	322.089	304.676	341.129	331.069	348.765	332.915	356.423	350.97	342.404	325.256	345.895	1.07906	0.258422	0.397782
P80317	T-complex protein 1 subunit zeta OS=Mus musculus OX=10090 GN=Cct6a PE=1 SV=3	26	30	32	10539.9	10236.2	10072.6	9650.19	10032.4	9877.63	9414.36	9443.82	9813.23	9680.19	9572.26	9521.19	10281.1	9852.15	9555.43	9590.98	1.07594	0.00603449	0.0349128
P38647	Stress-70 protein, mitochondrial OS=Mus musculus OX=10090 GN=Hspa9 PE=1 SV=3	44	39	44	13744.6	13791.4	14314.5	13513	13736.9	13346.3	13227.8	13524.1	13110.6	14417.4	13850.5	14131.4	13947.8	13531.1	13286.3	14131.2	1.06359	0.0131802	0.0570048
Q9CZH7	Matrix-remodeling-associated protein 7 OS=Mus musculus OX=10090 GN=Mxra7 PE=1 SV=2	1	2	2	97.8014	103.202	103.994	118.35	103.375	111.603	119.142	113.958	103.585	88.8036	103.562	104.915	101.628	110.939	112.039	98.8151	1.13383	0.140079	0.263611
Q9D4H8	Cullin-2 OS=Mus musculus OX=10090 GN=Cul2 PE=1 SV=2	9	7	12	2051.8	2034.52	2068.62	1983.21	1999.27	1924.3	1889.2	1917.39	1911.18	1970.37	1943.39	1990.48	2051.6	1968.66	1905.89	1967.98	1.07645	0.00094653	0.0114071
O54825	Bystin OS=Mus musculus OX=10090 GN=Bysl PE=1 SV=3	3	2	5	168.101	184.443	178.516	171.976	155.629	150.547	177.936	161.548	180.677	174.873	191.267	183.147	176.89	159.127	173.177	182.973	1.14986	0.0764753	0.17848
P60670	Nuclear protein localization protein 4 homolog OS=Mus musculus OX=10090 GN=Nploc4 PE=1 SV=3	15	13	14	2606.06	2501.45	2507.78	2572.13	2673.52	2618.98	2695.04	2705.52	2638.95	2350.4	2343.15	2457.93	2537.98	2621.21	2679.67	2383.25	1.12438	0.000728583	0.00967731
Q3UMU9	Hepatoma-derived growth factor-related protein 2 OS=Mus musculus OX=10090 GN=Hdgfl2 PE=1 SV=1	9	9	1	600.63	600.636	708.249	601.855	532.371	392.105	678.649	718.639	469.377	551.471	580.959	862.873	634.553	500.844	611.73	651.436	1.30067	0.441234	0.563363
P62141	Serine/threonine-protein phosphatase PP1-beta catalytic subunit OS=Mus musculus OX=10090 GN=Ppp1cb PE=1 SV=3	2	9	1	374.582	353.129	429.244	352.528	318.268	327.949	308.754	350.99	357.883	360.088	373.565	280.877	384.351	332.607	338.493	335.555	1.15557	0.34164	0.478368
Q60692	Proteasome subunit beta type-6 OS=Mus musculus OX=10090 GN=Psmb6 PE=1 SV=3	6	7	6	1020.59	988.561	1045.46	1034.85	1045.81	1039.23	988.181	1040.17	1022.64	1087.08	1056.16	1023.36	1017.94	1039.96	1016.77	1055.21	1.03781	0.264831	0.403273
Q7TMW6	Cytosolic Fe-S cluster assembly factor NARFL OS=Mus musculus OX=10090 GN=Narfl PE=1 SV=2	3	4	4	294.196	330.002	304.312	274.314	291.008	292.044	354.316	290.596	313.452	296.516	307.736	309.534	309.142	285.671	318.383	304.54	1.11451	0.254475	0.393516
Q63810	Calcineurin subunit B type 1 OS=Mus musculus OX=10090 GN=Ppp3r1 PE=1 SV=3	12	13	12	2336.96	2284.18	2213.27	2130.94	2166.66	2358.96	2233.17	2475.82	2345.84	2401.43	2175.84	2184.43	2277.57	2216.64	2349.53	2251.53	1.05995	0.544017	0.647322
P17183	Gamma-enolase OS=Mus musculus OX=10090 GN=Eno2 PE=1 SV=2	3	4	3	307.158	313.183	295.276	314.079	277.856	311.597	318.474	339.665	327.09	293.932	302.94	299.681	305.115	300.712	328.295	298.827	1.09861	0.0794516	0.183553
O08582	GTP-binding protein 1 OS=Mus musculus OX=10090 GN=Gtpbp1 PE=1 SV=2	6	8	9	1259.79	1176.25	1145.55	1227	1258.2	1273.65	1260.58	1319.43	1320.25	1141.82	1135.31	1149.74	1192.9	1252.8	1299.79	1142.28	1.13789	0.00339181	0.024327
Q8BVU0	Leucine-rich repeat and calponin homology domain-containing protein 3 OS=Mus musculus OX=10090 GN=Lrch3 PE=1 SV=3	6	7	7	552.532	510.082	538.245	523.808	542.079	539.327	511.512	537.56	502.239	530.177	528.309	538.22	533.326	535.011	516.89	532.218	1.03506	0.47473	0.59134
Q61191	Host cell factor 1 OS=Mus musculus OX=10090 GN=Hcfc1 PE=1 SV=2	10	12	11	2325.89	2150.82	2329.11	2386.42	2461.32	2336.94	2461.59	2414.53	2423.97	2518.31	2665.54	2602.19	2267.05	2394.35	2433.28	2594.64	1.1445	0.00430394	0.0283563
Q8BTI9	Phosphatidylinositol 4,5-bisphosphate 3-kinase catalytic subunit beta isoform OS=Mus musculus OX=10090 GN=Pik3cb PE=1 SV=2	5	3	5	403.818	391.554	379.766	367.482	395.565	371.232	365.909	358.242	370.528	362.826	354.673	378.509	391.59	377.891	364.858	365.203	1.07327	0.0713718	0.170923
P28271	Cytoplasmic aconitate hydratase OS=Mus musculus OX=10090 GN=Aco1 PE=1 SV=3	18	29	19	2538.52	2602.24	2640.25	2783.71	2659.65	2697.41	2558.49	2680.89	2606.36	2653.69	2591.63	2590.39	2593.33	2713.1	2614.76	2611.74	1.04618	0.0981881	0.210687
Q9EPL4	Methyltransferase-like protein 9 OS=Mus musculus OX=10090 GN=Mettl9 PE=1 SV=1	2	2	2	332.805	322.333	338.596	353.013	325.868	358.798	314.08	342.248	332.573	324.935	334.385	294.866	331.176	345.589	329.424	317.607	1.0881	0.285679	0.423188
Q8VDT9	39S ribosomal protein L50, mitochondrial OS=Mus musculus OX=10090 GN=Mrpl50 PE=1 SV=2		2	1		172.813	191.954		219.198	179.977		184.058	179.408		166.525	191.254	182.132	198.622	181.718	178.462	1.11297	0.686395	0.758437
Q9CQD1	Ras-related protein Rab-5A OS=Mus musculus OX=10090 GN=Rab5a PE=1 SV=1	2	5	3	189.217	193.405	190.779	204.285	184.952	206.256	177.957	201.762	195.261	205.47	196.81	184.633	191.126	198.259	191.392	195.449	1.03732	0.795663	0.843759
Q11011	Puromycin-sensitive aminopeptidase OS=Mus musculus OX=10090 GN=Npepps PE=1 SV=2	30	30	25	7469.62	7757.81	7360.65	7569.51	7309.23	7768.33	7431.91	7387.8	7545.48	7284.73	7300.92	7081.3	7527.51	7546.68	7454.77	7221.62	1.04501	0.146718	0.271739
O35295	Transcriptional activator protein Pur-beta OS=Mus musculus OX=10090 GN=Purb PE=1 SV=3	6	6	6	451.937	376.372	470.288	448.825	532.927	428.693	471.379	554.693	481.434	501.004	409.154	492.731	430.877	468.055	501.172	465.707	1.16314	0.457304	0.5767
Q9WVS8	Mitogen-activated protein kinase 7 OS=Mus musculus OX=10090 GN=Mapk7 PE=1 SV=1	3	2	4	159.829	149.539	155.132	139.021	138.913	152.295	151.082	152.395	151.736	146.615	155.701	137.383	154.776	143.275	151.737	146.375	1.08027	0.216316	0.353691
Q7TSV4	Phosphoglucomutase-2 OS=Mus musculus OX=10090 GN=Pgm2 PE=1 SV=1	10	12	11	2201.07	2227.54	2284.16	2510.82	2413.01	2445.9	2446.02	2486.46	2516.7	2221.54	2252.45	2132.7	2237.33	2456.24	2482.89	2201.64	1.12775	0.000175086	0.00431633
Q9CQH3	NADH dehydrogenase [ubiquinone] 1 beta subcomplex subunit 5, mitochondrial OS=Mus musculus OX=10090 GN=Ndufb5 PE=1 SV=1		1	1		152.329	162.493		166.658	140.226		138.809	146.175		158.611	167.512	157.329	152.872	142.444	163	1.14431	0.384756	0.515493
Q3UGR5	Haloacid dehalogenase-like hydrolase domain-containing protein 2 OS=Mus musculus OX=10090 GN=Hdhd2 PE=1 SV=2	3	4	3	298.127	316.899	323.213	347.447	336.59	347.142	370.472	341.634	321.874	283.638	304.561	307.454	312.562	343.689	344.086	298.36	1.15326	0.0140249	0.0591827
Q8BUR4	Dedicator of cytokinesis protein 1 OS=Mus musculus OX=10090 GN=Dock1 PE=1 SV=3	8	10	8	1487.08	1436.49	1470.64	1639.17	1592.92	1588.16	1582.39	1673.74	1627.44	1451.22	1456.7	1473.62	1464.58	1606.58	1627.43	1460.48	1.11431	0.000141212	0.00377964
Q99JI4	26S proteasome non-ATPase regulatory subunit 6 OS=Mus musculus OX=10090 GN=Psmd6 PE=1 SV=1	17	21	23	4168.44	4213.04	4172.4	3993.02	4142.63	4183.09	4177.08	4098.09	4187.23	4274.47	4159.26	4070.3	4184.58	4105.43	4153.94	4167.17	1.01928	0.640836	0.721904
E0CYQ0	MCG13350, isoform CRA_b OS=Mus musculus OX=10090 GN=Kctd17 PE=1 SV=1		1	1		36.4132	35.1592		38.3855	40.6484		41.1053	46.2467		38.5156	32.3652	35.7807	39.5008	43.6003	35.3067	1.2349	0.146634	0.27169
Q9R0X4	Acyl-coenzyme A thioesterase 9, mitochondrial OS=Mus musculus OX=10090 GN=Acot9 PE=1 SV=1	23	21	22	4904.36	5004.73	4972.87	4945.22	4814.11	4882.24	4697.87	4780.31	4679.85	4746.19	4694.5	4758.69	4960.48	4880.23	4719.14	4733.05	1.05114	0.00119132	0.0132593
O35737	Heterogeneous nuclear ribonucleoprotein H OS=Mus musculus OX=10090 GN=Hnrnph1 PE=1 SV=3	19	12	11	2478.65	2127.09	2240.48	2389.46	2621.7	2546.05	2516.35	2684.31	2731.56	2539.97	2491.33	2406.34	2277.44	2517.2	2642.44	2478.6	1.16027	0.0461402	0.12999
Q60605	Myosin light polypeptide 6 OS=Mus musculus OX=10090 GN=Myl6 PE=1 SV=3	24	19	24	11048	10692.6	10817.1	11047.7	11210.4	11088.1	10666.9	10576.6	10723.1	10898.4	11181.3	11032.7	10851.6	11115.2	10655.3	11036.8	1.04316	0.00914998	0.0447895
Q9D385	ADP-ribosylation factor-like protein 2-binding protein OS=Mus musculus OX=10090 GN=Arl2bp PE=1 SV=1	3	4	3	218.011	239.742	264.742	262.198	260.154	267.566	283.138	249.578	254.305	226.635	240.507	203.369	240.076	263.287	261.931	222.97	1.18082	0.0697212	0.169012
Q8CCB4	Vacuolar protein sorting-associated protein 53 homolog OS=Mus musculus OX=10090 GN=Vps53 PE=1 SV=1	6	11	11	1208.48	1124.01	1070.96	1034.92	1067.57	1083.32	959.486	1069.93	1114.3	1183.64	1125.02	1117.95	1133.08	1061.74	1045.84	1141.83	1.09178	0.173813	0.305491
O35495	Cyclin-dependent kinase 14 OS=Mus musculus OX=10090 GN=Cdk14 PE=1 SV=2	4	4	3	606.071	658.492	646.212	719.15	692.968	692.726	604.308	610.275	645.756	616.672	584.466	561.506	636.526	701.506	619.846	587.115	1.19484	0.00293013	0.0223742
Q8K4X7	1-acyl-sn-glycerol-3-phosphate acyltransferase delta OS=Mus musculus OX=10090 GN=Agpat4 PE=1 SV=1	2	2	5	571.604	472.704	458.678	390.645	475.768	449.812	427.503	464.472	489.268	498.089	474.897	490.084	498.575	437.256	459.708	487.595	1.14024	0.307811	0.445134
Q8JZY2	COMM domain-containing protein 10 OS=Mus musculus OX=10090 GN=Commd10 PE=1 SV=1	2	4	5	772.641	608.225	644.57	610.024	692.148	659.541	576.188	653.408	678.196	647.922	652.994	624.469	671.59	653.024	634.407	641.674	1.05861	0.846525	0.882315
Q80Y14	Glutaredoxin-related protein 5, mitochondrial OS=Mus musculus OX=10090 GN=Glrx5 PE=1 SV=2	3	3	3	573.632	552.138	560.114	561.748	520.256	578.943	533.047	590.841	568.97	598.038	603.23	558.438	561.891	553.093	563.778	586.222	1.0599	0.47075	0.587353
Q6ZQ88	Lysine-specific histone demethylase 1A OS=Mus musculus OX=10090 GN=Kdm1a PE=1 SV=2	2	4	2	232.308	211.417	227.435	207.161	233.356	219.571	221.983	249.12	232.066	256.684	224.243	239.064	223.539	219.77	234.124	239.631	1.09038	0.316158	0.453981
O08808	Protein diaphanous homolog 1 OS=Mus musculus OX=10090 GN=Diaph1 PE=1 SV=1	16	11	14	2005.07	2067.64	1985.63	2211.66	2136.32	2168.97	2100.45	2058.07	2202.27	1934.19	1989.34	1894.5	2019.14	2172.1	2119.41	1938.95	1.12024	0.00246959	0.0199549
Q99LS3	Phosphoserine phosphatase OS=Mus musculus OX=10090 GN=Psph PE=1 SV=1	7	8	13	2689.57	2933.66	2874.6	2625.62	2494.59	2397.46	2696.81	2346.45	2535.02	2548.14	2785.44	2753.04	2830.67	2504.15	2522.02	2693.45	1.13039	0.0665992	0.164536
Q9DC69	NADH dehydrogenase [ubiquinone] 1 alpha subcomplex subunit 9, mitochondrial OS=Mus musculus OX=10090 GN=Ndufa9 PE=1 SV=2	2	2	2	420.717	372.324	372.97	319.198	360.808	352.754	316.285	350.12	343.108	371.438	344.386	358.806	388.027	343.771	336.183	358.039	1.15421	0.0676043	0.16579
O70493	Sorting nexin-12 OS=Mus musculus OX=10090 GN=Snx12 PE=1 SV=1	4	9	9	1923.07	1980.3	2079.81	2129.24	2052.2	2047.61	2024.86	2058.91	1949.99	2092.23	2077.98	2091.98	1993.35	2076.02	2010.74	2087.39	1.04718	0.163419	0.29294
P62855	40S ribosomal protein S26 OS=Mus musculus OX=10090 GN=Rps26 PE=1 SV=3	3	3	3	871.124	778.1	792.944	801.443	871.92	858.677	909.328	921.649	917.94	853.501	863.726	865.835	813.054	843.451	916.291	861.004	1.12697	0.0276835	0.0931533
O08605	MAP kinase-interacting serine/threonine-protein kinase 1 OS=Mus musculus OX=10090 GN=Mknk1 PE=1 SV=2	1	1	1	9.29468	14.663	13.3259	13.7517	9.20735	21.2803	12.5256	14.4634	7.01993	15.3621	12.6004	9.308	12.2007	13.9152	10.8343	12.1683	1.28437	0.835644	0.872721
P70280	Vesicle-associated membrane protein 7 OS=Mus musculus OX=10090 GN=Vamp7 PE=1 SV=1	3	4	3	622.937	642.174	695.921	651.459	660.281	609.128	632.79	567.385	578.688	648.435	685.781	671.883	652.958	639.894	592.28	668.521	1.12872	0.0677578	0.165818
O88597	Beclin-1 OS=Mus musculus OX=10090 GN=Becn1 PE=1 SV=3	2	4	5	662.937	553.674	560.385	554.051	606.996	621.037	527.819	650.185	625.086	583.92	517.873	522.22	590.297	593.314	598.624	540.518	1.1075	0.486897	0.601383
O35887	Calumenin OS=Mus musculus OX=10090 GN=Calu PE=1 SV=1	33	6	35	10044	9764.07	10109.2	10953.6	11295.2	11252.2	11030.6	11376.9	10932.5	10232.8	9824.8	9967.04	9971.31	11165.9	11111.7	10006.8	1.11981	8.316e-05	0.00276256
P47809	Dual specificity mitogen-activated protein kinase kinase 4 OS=Mus musculus OX=10090 GN=Map2k4 PE=1 SV=2	8	6	5	734.754	688.147	717.39	624.648	702.005	650.169	698.54	696.206	684.766	712.36	683.944	717.976	713.17	658.164	693.144	704.601	1.08357	0.110737	0.227099
Q8R0A0	General transcription factor IIF subunit 2 OS=Mus musculus OX=10090 GN=Gtf2f2 PE=1 SV=1	1	1	2	108.111	100.729	104.679	104.531	110.449	110.146	109.897	120.763	121.684	116.545	107.144	102.575	104.463	108.341	117.324	108.601	1.12311	0.0971643	0.209828
Q8BRM2	RAB6-interacting golgin OS=Mus musculus OX=10090 GN=Gorab PE=1 SV=1	2	2	2	114.113	120.863	124.299	124.168	137.747	139.379	143.26	132.457	125.194	132.769	123.242	125.438	119.683	133.587	133.432	127.085	1.11617	0.117123	0.235757
Q9D0L7	Armadillo repeat-containing protein 10 OS=Mus musculus OX=10090 GN=Armc10 PE=1 SV=1	3	2	4	445.024	458.766	493.672	421.182	475.228	420.716	484.243	417.344	438.142	444.031	443.141	441.95	465.376	438.316	445.715	443.04	1.06174	0.624295	0.709068
P16627	Heat shock 70 kDa protein 1-like OS=Mus musculus OX=10090 GN=Hspa1l PE=1 SV=4	1	1	1	98.9248	97.8637	72.195	93.9474	73.2198	114.897	92.6755	91.1829	104.181	68.6878	91.9691	62.963	88.7451	92.4571	95.8418	73.5421	1.30322	0.337779	0.475122
Q6ZQI3	Malectin OS=Mus musculus OX=10090 GN=Mlec PE=1 SV=2	6	5	4	914.944	838.701	859.131	893.963	928.237	926.734	905.428	896.177	934.487	862.955	914.174	856.937	870.336	916.173	911.886	877.651	1.05267	0.199851	0.333757
Q60996	Serine/threonine-protein phosphatase 2A 56 kDa regulatory subunit gamma isoform OS=Mus musculus OX=10090 GN=Ppp2r5c PE=1 SV=2		2	1		127.702	127.454		129.073	154.402		143.386	117.56		122.731	123.477	127.578	141.171	129.833	123.103	1.14677	0.575285	0.672314
Q8BJY1	26S proteasome non-ATPase regulatory subunit 5 OS=Mus musculus OX=10090 GN=Psmd5 PE=1 SV=4	16	21	22	3018.26	2984.98	2961.23	2880.83	2773.55	2944.3	2951.99	2971.52	2886.59	2839.23	2960.25	2898.18	2988.07	2865.36	2936.47	2898.8	1.04283	0.151536	0.277914
P21278	Guanine nucleotide-binding protein subunit alpha-11 OS=Mus musculus OX=10090 GN=Gna11 PE=1 SV=1	3	3	6	411.573	435.367	401.18	377.334	370.496	407.234	401.358	367.773	393.541	374.672	391.302	362.983	415.796	384.696	387.288	376.141	1.10543	0.101997	0.21575
Q99K28	ADP-ribosylation factor GTPase-activating protein 2 OS=Mus musculus OX=10090 GN=Arfgap2 PE=1 SV=1	6	7	8	699.893	713.864	694.546	730.866	705.721	708.984	727.93	726.787	712.278	661.225	673.542	704.106	702.721	715.104	722.296	679.387	1.06316	0.0313186	0.0997064
Q8VDP3	[F-actin]-monooxygenase MICAL1 OS=Mus musculus OX=10090 GN=Mical1 PE=1 SV=1	1	3	3	325.793	335.769	305.313	333.237	291.872	343.401	318.558	324.565	335.586	299.105	324.487	292.393	322.039	322.044	326.161	305.02	1.06931	0.532141	0.637317
P28352	DNA-(apurinic or apyrimidinic site) lyase OS=Mus musculus OX=10090 GN=Apex1 PE=1 SV=2	11	10	8	1881.24	1685.2	1636.93	1765.64	1872	1910.1	1804.73	2017.94	2184.42	1983.56	1860.02	1703.71	1731.31	1848.22	1996.27	1845.52	1.15304	0.217297	0.354378
Q6ZPT1	Kelch-like protein 9 OS=Mus musculus OX=10090 GN=Klhl9 PE=2 SV=2	1	1	3	273.163	255.618	294.329	318.495	313.613	256.594	236.382	265.173	258.313	255.558	249.195	274.362	273.915	294.836	252.986	259.488	1.16542	0.172266	0.304489
Q8BFW7	Lipoma-preferred partner homolog OS=Mus musculus OX=10090 GN=Lpp PE=1 SV=1	19	20	16	2941.18	2913.85	2899.06	2720.39	2848.81	2968.91	2797.93	2835.38	2787.38	3018.91	2880.37	2823.05	2917.98	2844.22	2806.82	2906.29	1.0396	0.354881	0.491067
Q9WUA3	ATP-dependent 6-phosphofructokinase, platelet type OS=Mus musculus OX=10090 GN=Pfkp PE=1 SV=1	28	24	28	3604.22	3763.5	3632.3	3641.97	3514.01	3474.84	3582.34	3396.17	3518.43	3445.38	3600.24	3648.35	3666.02	3542.89	3498.13	3563.59	1.048	0.243596	0.383917
Q8R366	Immunoglobulin superfamily member 8 OS=Mus musculus OX=10090 GN=Igsf8 PE=1 SV=2	2	6	1	298.702	314.856	320.496	336.369	332.949	322.887	267.758	308.976	301.185	379.957	326.004	338.217	311.213	330.685	292.079	347.31	1.1891	0.0334725	0.104384
P26516	26S proteasome non-ATPase regulatory subunit 7 OS=Mus musculus OX=10090 GN=Psmd7 PE=1 SV=2	5	6	9	1382.51	1530.33	1570.44	1763.48	1674.86	1695.96	1829.17	1687.95	1618.31	1426.06	1508.06	1516.5	1492.19	1711.02	1709.59	1482.97	1.15378	0.0100613	0.0476033
Q99L45	Eukaryotic translation initiation factor 2 subunit 2 OS=Mus musculus OX=10090 GN=Eif2s2 PE=1 SV=1	12	18	22	3084.69	3141.58	3147.64	3366.35	3212.29	3102.12	3537.06	3318.53	3205.17	2910.4	3226.11	3443.57	3124.51	3225.11	3350.78	3185.76	1.07242	0.479154	0.595163
Q9DBF1	Alpha-aminoadipic semialdehyde dehydrogenase OS=Mus musculus OX=10090 GN=Aldh7a1 PE=1 SV=4	11	11	11	1967.83	2093.22	2092.13	2141.94	2084.33	2161.96	2138.1	2064.59	2000.06	2072.72	2078.45	2066.45	2050.21	2129.16	2066.82	2072.53	1.03851	0.377966	0.50932
O88952	Protein lin-7 homolog C OS=Mus musculus OX=10090 GN=Lin7c PE=1 SV=2	2	2	4	402.194	399.905	376.623	436.016	372.983	428.911	418.29	410.486	399.007	332.484	405.611	384.443	392.735	411.642	409.184	372.882	1.10395	0.350644	0.486786
P56391	Cytochrome c oxidase subunit 6B1 OS=Mus musculus OX=10090 GN=Cox6b1 PE=1 SV=2	1	1	1	197.459	175.695	178.729	138.928	204.755	146.137	156.644	140.155	158.825	155.887	128.315	165.228	183.715	160.791	151.64	148.956	1.23335	0.279695	0.417226
O54918	Bcl-2-like protein 11 OS=Mus musculus OX=10090 GN=Bcl2l11 PE=1 SV=1	1	2	1	350.76	382.455	380.002	365.389	326.044	375.913	356.762	360.372	342.802	404.518	408.559	378.712	370.788	355.118	353.23	397.04	1.12403	0.0751613	0.176513
Q3UR97	Sorting nexin-21 OS=Mus musculus OX=10090 GN=Snx21 PE=1 SV=1	2	2	2	93.7077	112.577	99.2048	88.9445	95.2688	100.816	102.07	87.1949	93.127	104.314	93.9953	95.8883	101.528	94.8855	93.9338	97.965	1.08085	0.593881	0.686682
P08249	Malate dehydrogenase, mitochondrial OS=Mus musculus OX=10090 GN=Mdh2 PE=1 SV=3	29	27	34	13376.7	13397.1	14020.3	13968	13764.9	13964.2	14273.3	14610	14159.4	14020.3	13866.4	13494.4	13594.8	13898.7	14346.3	13792	1.05528	0.0433563	0.123905
Q8BWG8	Beta-arrestin-1 OS=Mus musculus OX=10090 GN=Arrb1 PE=1 SV=1	2	3	5	279.25	267.728	278.289	281.406	272.287	300.847	329.201	347.546	286.893	284.701	286.996	308.527	275.039	284.6	320.183	293.215	1.16414	0.0728642	0.17308
Q8BFV2	PCI domain-containing protein 2 OS=Mus musculus OX=10090 GN=Pcid2 PE=1 SV=1	2	1	2	337.621	286.157	288.438	290.911	294.324	305.478	295.549	314.017	329.197	276.844	306.428	277.812	303.176	296.84	312.617	286.707	1.09037	0.43403	0.557556
Q6PE15	Mycophenolic acid acyl-glucuronide esterase, mitochondrial OS=Mus musculus OX=10090 GN=Abhd10 PE=1 SV=1	2	5	3	623.413	618.265	629.603	622.129	654.505	632.169	665.08	659.887	652.112	632.501	610.466	629.239	623.743	636.124	659.005	623.993	1.05653	0.0150303	0.0619189
Q6PDM2	Serine/arginine-rich splicing factor 1 OS=Mus musculus OX=10090 GN=Srsf1 PE=1 SV=3	8	7	7	1478.1	1359.38	1331	1300.03	1425.02	1347.87	1442.56	1538.46	1454.75	1339.46	1237.29	1426.53	1388.06	1356.67	1477.98	1332.17	1.10946	0.173881	0.305491
Q6ZWN5	40S ribosomal protein S9 OS=Mus musculus OX=10090 GN=Rps9 PE=1 SV=3	8	10	13	3147.32	2862.57	2764.33	2893.89	3093.6	2988.31	3227.73	3278.03	3493.55	3208.03	3242.77	3230.78	2920.31	2990.82	3331.14	3227.16	1.14068	0.0172017	0.0683344
Q8K297	Procollagen galactosyltransferase 1 OS=Mus musculus OX=10090 GN=Colgalt1 PE=1 SV=2	12	9	13	2117.93	2103.89	2005.93	2093.57	2101.13	2104.48	2040.7	1989.5	2109.31	2087.83	2145.53	2120.32	2075.31	2099.72	2045.92	2117.76	1.03512	0.314087	0.45156
Q8CHP8	Glycerol-3-phosphate phosphatase OS=Mus musculus OX=10090 GN=Pgp PE=1 SV=1	13	10	12	1792.96	1925.96	1904.5	1956.74	1826.05	1930.2	2060.78	1860.53	1902.92	1781.1	1979.03	1853.97	1873.56	1903.48	1939.53	1869.59	1.03741	0.752075	0.810609
Q99JN2	Kelch-like protein 22 OS=Mus musculus OX=10090 GN=Klhl22 PE=1 SV=1	6	5	4	652.012	591.275	576.531	543.955	514.33	572.181	504.994	616.13	533.225	565.661	544.888	584.685	605.744	542.974	549.486	564.844	1.1156	0.280662	0.417871
Q921H8	3-ketoacyl-CoA thiolase A, peroxisomal OS=Mus musculus OX=10090 GN=Acaa1a PE=1 SV=1	16	18	17	2603.6	2642.72	2558.59	2596.44	2586.07	2525.65	2360.86	2465.11	2565.91	2574.26	2441.25	2485.01	2601.41	2569.2	2462.54	2499.56	1.0564	0.128444	0.248966
Q8BKH7	Target of rapamycin complex 2 subunit MAPKAP1 OS=Mus musculus OX=10090 GN=Mapkap1 PE=1 SV=1	3	1	1	554.746	564.007	558.067	634.598	578.143	615.369	544.144	624.526	589.442	533.996	500.808	504.608	558.927	608.915	585.107	512.926	1.18714	0.00920589	0.0449171
O08848	60 kDa SS-A/Ro ribonucleoprotein OS=Mus musculus OX=10090 GN=Trove2 PE=1 SV=1	6	9	5	1116.43	1145.13	1110.18	990.446	1028.82	1040.93	1042.39	999.378	1069.7	1119.26	1095.2	1047.72	1123.81	1019.84	1036.75	1086.98	1.10195	0.0114251	0.051556
Q9CYL5	Golgi-associated plant pathogenesis-related protein 1 OS=Mus musculus OX=10090 GN=Glipr2 PE=1 SV=3	3	2	2	503.598	415.361	434.964	422.376	477.036	414.753	391.973	397.129	461.825	440.333	468.756	446.739	449.767	437.2	415.804	451.781	1.08652	0.582772	0.678356
P54227	Stathmin OS=Mus musculus OX=10090 GN=Stmn1 PE=1 SV=2	14	12	16	5995.18	6244.34	5967.12	6025.85	6108.91	6297.72	6420.8	6369.57	6473.99	6446.24	6165.26	6149.25	6067.61	6143.11	6421.31	6252.11	1.05829	0.0579518	0.15072
Q9DBN9	Probable ATP-dependent RNA helicase DDX59 OS=Mus musculus OX=10090 GN=Ddx59 PE=1 SV=1	2	1	1	108.646	96.0333	94.3896	107.102	111.525	121.754	104.754	113.505	106.501	109.905	109.344	107.762	99.4918	113.296	108.188	109	1.13875	0.0968739	0.209401
Q923B1	Lariat debranching enzyme OS=Mus musculus OX=10090 GN=Dbr1 PE=1 SV=2	6	5	4	518.244	508.846	511.06	553.25	603.623	574.19	584.309	589.508	597.987	553.296	507.121	525.861	512.701	576.653	590.575	528.421	1.15189	0.00164403	0.0158124
Q9D024	Coiled-coil domain-containing protein 47 OS=Mus musculus OX=10090 GN=Ccdc47 PE=1 SV=2	4	5	4	386.531	367.495	340.407	300.985	344.989	324.431	293.298	314.331	328.995	373.219	327.217	360.198	364.316	322.966	311.862	353.004	1.1682	0.0570693	0.149196
Q5SNZ0	Girdin OS=Mus musculus OX=10090 GN=Ccdc88a PE=1 SV=2	13	10	19	2683.7	2701.98	2693.54	2825.32	2956.13	2800.27	2812.91	2716.5	2709.35	2601.15	2548.48	2719.93	2693.06	2859.76	2745.85	2622.21	1.09059	0.0144558	0.0605675
Q64311	Protein N-terminal asparagine amidohydrolase OS=Mus musculus OX=10090 GN=Ntan1 PE=1 SV=3	2	3	2	127.238	131.475	138.512	120.256	98.3052	94.4796	121.467	131.962	103.506	125.155	132.374	157.619	132.327	103.755	118.383	137.706	1.32723	0.0516405	0.139656
Q99J45	Nuclear receptor-binding protein OS=Mus musculus OX=10090 GN=Nrbp1 PE=1 SV=1	5	9	7	659.691	647.604	640.211	606.741	637.11	611.486	601.346	608.662	627.613	632.141	606.544	620.61	649.119	618.303	612.441	619.677	1.05989	0.0407274	0.119155
P01899	H-2 class I histocompatibility antigen, D-B alpha chain OS=Mus musculus OX=10090 GN=H2-D1 PE=1 SV=2	14	17	15	2457.43	2482.2	2537.19	2672.41	2618.13	2733.69	2620.71	2657.6	2567.93	2732.94	2725.56	2644.68	2492.05	2674.33	2615.15	2700.76	1.08375	0.00300821	0.0227633
Q61211	Eukaryotic translation initiation factor 2D OS=Mus musculus OX=10090 GN=Eif2d PE=1 SV=3	1	2	8	160.256	151.326	149.308	134.191	168.983	161.253	131.496	150.805	146.741	185.227	140.057	153.868	153.557	154.06	142.767	158.63	1.11111	0.645639	0.726092
P21995	Embigin OS=Mus musculus OX=10090 GN=Emb PE=1 SV=2	2	3	3	359.583	365.043	334.128	388.551	388.667	459.252	390.83	393.663	394.107	365.081	356.673	316.558	352.657	410.858	392.864	345.438	1.18938	0.0333545	0.104155
Q8BJW6	Eukaryotic translation initiation factor 2A OS=Mus musculus OX=10090 GN=Eif2a PE=1 SV=2	9	7	7	1404.39	1311.31	1454.9	1407.09	1503.74	1427.73	1547.1	1572.12	1463.62	1501.21	1472.62	1513.54	1388.92	1445.6	1526.9	1495.69	1.09935	0.0626211	0.15855
Q62348	Translin OS=Mus musculus OX=10090 GN=Tsn PE=1 SV=1	8	12	9	2446.92	2530.19	2569.63	2546.4	2616.25	2575.16	2531.27	2541.88	2638.18	2669.37	2505.65	2411	2515.06	2579.11	2570	2526.44	1.02547	0.71402	0.780324
Q9EQP2	EH domain-containing protein 4 OS=Mus musculus OX=10090 GN=Ehd4 PE=1 SV=1	15	20	22	4178.98	4216.69	4133.27	4263.87	4185.65	4243.21	4163.77	4162.55	4140.86	4000.11	4041.86	4089.41	4176.18	4230.78	4155.71	4043.63	1.04628	0.00173016	0.0162082
P27659	60S ribosomal protein L3 OS=Mus musculus OX=10090 GN=Rpl3 PE=1 SV=3	21	26	24	5563.95	4927.75	4671.1	5121.38	5488.3	5602.7	5652.82	5802.54	6238.99	5694.9	5814.46	5520.26	5040.62	5400.17	5892.95	5675.25	1.16909	0.0507059	0.138569
Q91WR3	Activating signal cointegrator 1 complex subunit 2 OS=Mus musculus OX=10090 GN=Ascc2 PE=1 SV=1	1	2	3	47.178	50.8823	62.3565	39.7148	45.5575	32.8987	53.6537	47.2856	48.4756	49.1729	45.9939	45.9886	53.0961	39.0449	49.7299	47.0283	1.35988	0.0543144	0.144797
A0A0F6AIX5	Lipid droplet-associated hydrolase OS=Mus musculus OX=10090 GN=Ldah PE=1 SV=1	4	1	5	156.611	143.748	146.394	166.855	152.884	157.199	147.389	179.84	166.151	138.956	133.34	140.067	148.816	158.873	163.915	137.422	1.19278	0.031433	0.099886
Q9DBZ5	Eukaryotic translation initiation factor 3 subunit K OS=Mus musculus OX=10090 GN=Eif3k PE=1 SV=1	6	8	6	1344.48	1309.54	1354.34	1361.84	1386.34	1338.45	1472.99	1424.17	1455.92	1397.44	1456.7	1428.04	1335.98	1362.07	1450.89	1427.19	1.08601	0.00175766	0.0164329
Q62276	Mediator of RNA polymerase II transcription subunit 22 OS=Mus musculus OX=10090 GN=Med22 PE=1 SV=2	3	3	3	297.89	306.24	298.916	294.434	320.09	301.637	312.163	319.239	306.773	305.728	264.646	302.889	300.992	305.198	312.684	290.466	1.07649	0.349805	0.486053
O35704	Serine palmitoyltransferase 1 OS=Mus musculus OX=10090 GN=Sptlc1 PE=1 SV=2	3	2	1	117.466	114.002	107.635	132.121	119.306	113.806	124.307	122.043	132.628	115.952	134.496	135.778	112.96	121.507	126.245	128.412	1.13679	0.163373	0.29294
Q9Z1R2	Large proline-rich protein BAG6 OS=Mus musculus OX=10090 GN=Bag6 PE=1 SV=1	10	13	13	1132.55	1225.45	1170.01	1270.46	1219.43	1241.7	1267.06	1261.59	1271.88	1269.34	1232.94	1255.81	1175.39	1243.69	1266.84	1252.61	1.07781	0.0190465	0.072709
P97429	Annexin A4 OS=Mus musculus OX=10090 GN=Anxa4 PE=1 SV=4	12	11	11	1666.37	1738.23	1482.63	1693.4	1752.83	1594.32	1493.08	1456.31	1804.12	1549.64	1455.12	1521.42	1625.44	1678.9	1577.13	1508.2	1.11318	0.42324	0.549004
O55236	mRNA-capping enzyme OS=Mus musculus OX=10090 GN=Rngtt PE=1 SV=1	3	3	1	348.993	333.514	327.868	344.955	347.999	344.932	334.062	332.083	323.295	325.262	339.677	357.176	336.674	345.959	329.78	340.456	1.04906	0.321896	0.459403
Q8BFY6	Peflin OS=Mus musculus OX=10090 GN=Pef1 PE=1 SV=1	7	3	4	378.533	370.942	376.023	382.578	373.873	413.279	360.842	390.015	358.99	388.261	375.383	361.922	375.153	389.55	369.681	375.034	1.05375	0.455741	0.575233
Q99JB8	Protein kinase C and casein kinase II substrate protein 3 OS=Mus musculus OX=10090 GN=Pacsin3 PE=1 SV=1	1	9	9	633.933	584.51	592.526	486.048	604.476	609.466	602.975	621.315	655.267	715.578	628.234	581.275	603.274	563.641	626.147	639.323	1.13427	0.376882	0.50932
Q8VEH5	EPM2A-interacting protein 1 OS=Mus musculus OX=10090 GN=Epm2aip1 PE=1 SV=1	8	10	5	1169.95	1124.21	1056.29	1103.35	1086.28	1128.21	1053.61	1073.36	1156.69	1109.37	1152.43	1095.08	1115.83	1105.81	1093.65	1118.7	1.0229	0.890442	0.91566
Q6IR34	G-protein-signaling modulator 1 OS=Mus musculus OX=10090 GN=Gpsm1 PE=1 SV=3	7	7	9	624.881	621.833	621.242	588.149	616.895	579.223	628.464	587.586	588.574	582.467	597.648	634.923	622.65	594.541	601.244	604.616	1.04728	0.429127	0.553422
Q80ZM5	H1 histone family, member X OS=Mus musculus OX=10090 GN=H1fx PE=1 SV=1	3	3	6	576.619	450.854	443.222	544.193	560.937	549.109	497.235	618.413	685.043	679.077	666.92	619.751	486.611	551.369	595.003	654.742	1.34551	0.0618641	0.157228
O35071	Kinesin-like protein KIF1C OS=Mus musculus OX=10090 GN=Kif1c PE=1 SV=2		2	2		124.563	118.609		124.903	111.489		124.632	131.921		122.119	134.196	121.549	118.006	128.225	128.015	1.0866	0.489539	0.603739
Q9R190	Metastasis-associated protein MTA2 OS=Mus musculus OX=10090 GN=Mta2 PE=1 SV=1	6	8	8	952.209	847.839	888.132	924.272	986.071	948.49	995.834	1030.16	1030.23	998.356	1006.6	1003.82	895.037	952.607	1018.61	1002.92	1.13807	0.0074636	0.0398626
Q67FY2	B-cell CLL/lymphoma 9-like protein OS=Mus musculus OX=10090 GN=Bcl9l PE=1 SV=1	1	2	1	224.526	250.535	286.643	224.918	291.633	280.872	439.453	346.219	290.317	251.953	252.461	283.017	252.634	264.113	353.491	262.085	1.39922	0.0683112	0.166558
Q6TXD4	Dynamin-binding protein OS=Mus musculus OX=10090 GN=Dnmbp PE=1 SV=2	1		1	24.8854		21.9183	24.5517		25.3152	16.9348		24.4255	31.2176		25.9305	23.3547	24.9305	20.3382	28.4515	1.39892	0.306631	0.444112
Q8JZU2	Tricarboxylate transport protein, mitochondrial OS=Mus musculus OX=10090 GN=Slc25a1 PE=1 SV=1	2	2	1	98.3723	100.407	89.1795	98.7796	99.0027	73.6234	81.6973	78.1496	92.1914	93.4328	94.723	117.288	95.8591	89.6279	83.806	101.252	1.20817	0.305168	0.442912
Q6PGL7	WASH complex subunit 2 OS=Mus musculus OX=10090 GN=Washc2 PE=1 SV=1	5	6	10	548.838	538.974	553.633	551.915	628.59	591.673	627.093	604.603	591.655	594.864	550.543	585.75	547.114	589.894	607.608	576.732	1.11057	0.0748061	0.176023
Q8BMQ2	General transcription factor 3C polypeptide 4 OS=Mus musculus OX=10090 GN=Gtf3c4 PE=1 SV=2		3	4		261.543	255.91		280.329	272.08		274.471	287.792		277.179	277.739	258.711	276.173	281.053	277.459	1.08636	0.0567597	0.148693
Q9ET30	Transmembrane 9 superfamily member 3 OS=Mus musculus OX=10090 GN=Tm9sf3 PE=1 SV=1	3	2	5	323.202	327.065	299.999	323.963	302.278	309.471	278.952	281.45	294.963	299.64	314.964	321.323	316.526	311.774	285.036	311.842	1.11048	0.0322115	0.101602
Q8R323	Replication factor C subunit 3 OS=Mus musculus OX=10090 GN=Rfc3 PE=1 SV=1	11	10	9	1800.47	1587.29	1734.58	1688.26	1812.11	1679.71	1633.69	1691.11	1696.81	1730.32	1762.22	1741.65	1705.08	1725.65	1673.63	1744.68	1.04245	0.642267	0.723168
P62267	40S ribosomal protein S23 OS=Mus musculus OX=10090 GN=Rps23 PE=1 SV=3	5	5	6	589.788	558.396	562.632	574.674	630.625	605.139	663.684	620.842	678.446	597.468	615.751	579.396	570.104	603.044	653.862	597.354	1.14692	0.0162641	0.0656732
O88746	Target of Myb protein 1 OS=Mus musculus OX=10090 GN=Tom1 PE=1 SV=1	9	8	10	532.863	573.226	571.712	575.125	559.952	530.768	520.161	514.79	493.991	556.481	536.662	588.159	558.95	554.974	509.522	560.036	1.09914	0.0523441	0.140906
Q91WC0	Histone-lysine N-methyltransferase setd3 OS=Mus musculus OX=10090 GN=Setd3 PE=1 SV=1	6	7	4	305.514	282.878	328.202	341.669	343.701	309.618	332.792	346.495	310.332	302.329	309.23	334.151	304.97	331.287	329.533	314.945	1.08629	0.354646	0.490887
P47226	Testin OS=Mus musculus OX=10090 GN=Tes PE=1 SV=1	2	3	7	603.287	605.497	582.596	630.626	568.311	636.741	600.655	653.966	624.932	571.378	578.172	561.677	597.037	611.092	626.139	570.369	1.09778	0.0990977	0.211948
P07146	Anionic trypsin-2 OS=Mus musculus OX=10090 GN=Prss2 PE=1 SV=1	1	1	1	63.4201	58.2692	53.9191	45.7623	54.704	53.4361	55.7864	59.0763	59.8183	54.5814	47.5008	52.3768	58.4076	51.1431	58.2003	51.3998	1.14204	0.0985817	0.211319
Q9EP53	Hamartin OS=Mus musculus OX=10090 GN=Tsc1 PE=1 SV=1	1	3	3	172.37	156.784	152.916	161.594	162.118	157.941	148.293	167.894	158.518	151.471	146.931	164.352	160.474	160.54	158.032	154.078	1.04194	0.762542	0.81827
O35326	Serine/arginine-rich splicing factor 5 OS=Mus musculus OX=10090 GN=Srsf5 PE=1 SV=2	3	6	4	1036.07	1017.97	935.698	959.087	1023.62	1061.34	978.144	988.055	1010.58	1044.76	988.409	1010.43	995.604	1013.8	992.168	1014.27	1.02228	0.862254	0.894133
Q99KR3	Endoribonuclease LACTB2 OS=Mus musculus OX=10090 GN=Lactb2 PE=1 SV=1	4	7	6	962.352	1031.11	1019.47	965.17	936.297	1005.7	989.441	943.668	969.004	982.01	987.899	904.798	1003.86	968.639	967.189	957.473	1.04844	0.477124	0.593153
Q9WU78	Programmed cell death 6-interacting protein OS=Mus musculus OX=10090 GN=Pdcd6ip PE=1 SV=3	40	41	44	8516.1	8864.11	8755.55	9226.19	8621.51	8934.88	8856.48	8611.12	8747.63	8195.31	8697.33	8356.01	8710.7	8924.11	8737.83	8413.63	1.06067	0.119621	0.239549
P40142	Transketolase OS=Mus musculus OX=10090 GN=Tkt PE=1 SV=1	46	46	42	17232.8	17880	18094.4	17688.1	17109.6	18006.7	18347.9	18168.3	17443	17818.2	17929.2	17542.9	17731.9	17597.5	17982.1	17762.7	1.02186	0.727635	0.790959
Q8R2Y0	Monoacylglycerol lipase ABHD6 OS=Mus musculus OX=10090 GN=Abhd6 PE=1 SV=1	6	3	1	300.893	294.413	280.52	305.689	302.703	328.165	308.045	350.026	368.145	319.109	286.594	256.905	291.817	311.982	341.123	286.413	1.19102	0.0834786	0.18972
P23249	Putative helicase MOV-10 OS=Mus musculus OX=10090 GN=Mov10 PE=1 SV=2	5	9	12	1837.59	1723.24	1680	1552.64	1665.14	1682.55	1553.7	1565.43	1577.07	1789.67	1779.78	1793.98	1745.69	1632.41	1565.37	1787.8	1.14209	0.00343067	0.0244959
P42208	Septin-2 OS=Mus musculus OX=10090 GN=Sept2 PE=1 SV=2	24	26	22	6828.97	6498.07	6534.18	6595.33	6856.96	6715.04	6521.95	6566.56	6651.62	6740.71	6765.36	6786.12	6618.76	6721.6	6579.83	6764.04	1.028	0.258958	0.39845
P63085	Mitogen-activated protein kinase 1 OS=Mus musculus OX=10090 GN=Mapk1 PE=1 SV=3	17	28	15	4336.24	4515.14	4482.93	4744.94	4394.19	4414.86	4553.02	4650.63	4557.27	4303.86	4378.1	4483	4444.08	4515.18	4586.75	4387.71	1.04536	0.276648	0.414264
Q80V76	Pygopus 2 OS=Mus musculus OX=10090 GN=Pygo2 PE=1 SV=1	2	1	2	148.972	164.724	147.144	156.713	186.186	160.117	157.114	120.79	155.708	162.965	154.064	162.795	153.415	167.172	143.5	159.887	1.16496	0.310501	0.447642
Q8VCN5	Cystathionine gamma-lyase OS=Mus musculus OX=10090 GN=Cth PE=1 SV=1	4	10	7	1251.36	1250.09	1245.83	1080.66	1057.09	1039.38	1078.76	1038.85	1057.19	1129.66	1194.41	1198.04	1249.09	1058.91	1058.14	1173.61	1.18046	2.66781e-05	0.00150555
Q91V89	Serine/threonine-protein phosphatase 2A 56 kDa regulatory subunit OS=Mus musculus OX=10090 GN=Ppp2r5d PE=1 SV=1	22	23	24	4778.75	4901.99	4828.92	4961.17	4914.88	4821.18	4869.07	4902.65	4871.04	4582.49	4471.96	4670.34	4836.29	4898.73	4880.89	4574.21	1.07095	0.00144041	0.0146319
Q91YP2	Neurolysin, mitochondrial OS=Mus musculus OX=10090 GN=Nln PE=1 SV=1	11	7	11	1137.51	1165.46	1210.24	1136.61	1119.14	1063.58	1148.98	1034.01	1085.14	1082.33	1186.81	1146.47	1170.69	1106	1088.37	1137.72	1.07564	0.23668	0.376438
Q8BW10	RNA-binding protein NOB1 OS=Mus musculus OX=10090 GN=Nob1 PE=1 SV=1	1	2	2	68.4372	48.779	49.2664	55.4657	50.8525	44.6843	56.1079	52.3641	62.5488	25.6936	53.7088	49.205	54.7888	50.1376	56.8537	40.7968	1.39358	0.367689	0.503141
Q9D8L5	Coiled-coil domain-containing protein 91 OS=Mus musculus OX=10090 GN=Ccdc91 PE=1 SV=2	2	5	2	300.492	320.715	318.81	314.566	322.53	297.451	333.157	320.325	326.588	304.238	288.883	309.605	313.205	311.338	326.648	300.779	1.08601	0.0998981	0.212692
Q9Z1S0	Mitotic checkpoint serine/threonine-protein kinase BUB1 beta OS=Mus musculus OX=10090 GN=Bub1b PE=1 SV=2	4	3	4	487.689	465.077	452.593	429.461	430.501	454.019	408.14	452.56	447.333	467.337	444.488	438.682	468.23	437.849	435.551	450.001	1.07503	0.199672	0.333757
P57080	Ubiquitin carboxyl-terminal hydrolase 25 OS=Mus musculus OX=10090 GN=Usp25 PE=1 SV=2	3	2	1	134.716	132.977	114.082	130.698	128.364	109.479	120.083	125.294	131.808	129.042	127.902	159.169	126.903	122.466	125.637	137.982	1.1267	0.481748	0.597621
P22366	Myeloid differentiation primary response protein MyD88 OS=Mus musculus OX=10090 GN=Myd88 PE=1 SV=3	2	1	3	320.86	304.842	292.857	293.921	279.938	313.451	290.497	326.236	313.807	278.031	272.294	263.195	305.972	295.452	309.822	271.104	1.14281	0.0385571	0.1154
E9QPX3	NADH dehydrogenase [ubiquinone] iron-sulfur protein 4, mitochondrial OS=Mus musculus OX=10090 GN=Ndufs4 PE=1 SV=1	1	2	1	349.609	341.681	323.324	307.31	341.373	302.796	303.383	289.941	341.854	331.051	318.358	323.38	338.024	316.703	310.967	324.221	1.08701	0.385794	0.516451
P17742	Peptidyl-prolyl cis-trans isomerase A OS=Mus musculus OX=10090 GN=Ppia PE=1 SV=2	24	25	24	29383.1	29824.1	29719.1	28127.3	27964.8	28180.9	29001.4	29527.4	27995.1	28783	27978.6	29399.8	29641.5	28090.9	28834.3	28714.6	1.0552	0.049474	0.136535
P56565	Protein S100-A1 OS=Mus musculus OX=10090 GN=S100a1 PE=1 SV=2	1	2	1	128.336	159.085	147.143	158.736	132.468	158.932	154.132	152.294	151.163	144.262	141.618	128.228	144.291	149.508	152.525	137.853	1.10643	0.491816	0.605375
A2ARP1	Inositol hexakisphosphate and diphosphoinositol-pentakisphosphate kinase 1 OS=Mus musculus OX=10090 GN=Ppip5k1 PE=1 SV=1	1		1	95.6062		96.4902	76.8967		81.2106	70.5691		69.8475	87.2573		82.7809	96.0472	79.0242	70.2074	84.9896	1.36805	0.00144632	0.0146319
Q9ERD7	Tubulin beta-3 chain OS=Mus musculus OX=10090 GN=Tubb3 PE=1 SV=1	3	6	5	1688.03	1657.22	1560.97	1718.03	1695.56	1678.78	1697.41	1707.78	1797.02	1478.6	1521.51	1545.3	1634.5	1697.38	1733.5	1514.88	1.14431	0.00200321	0.0175923
P61028	Ras-related protein Rab-8B OS=Mus musculus OX=10090 GN=Rab8b PE=1 SV=1	3	1	2	313.861	323.197	328.367	333.932	320.177	333.584	336.75	320.364	331.201	332.015	352.821	323.407	321.752	329.168	329.368	335.857	1.04384	0.446053	0.567127
Q8VD75	Huntingtin-interacting protein 1 OS=Mus musculus OX=10090 GN=Hip1 PE=1 SV=2	9	12	9	1595.78	1499.15	1458.04	1481.27	1518.75	1444.99	1452.48	1472.63	1590.56	1423.03	1462.03	1458.98	1516.57	1481.36	1504.01	1447.91	1.04742	0.472457	0.588874
P84096	Rho-related GTP-binding protein RhoG OS=Mus musculus OX=10090 GN=Rhog PE=1 SV=1	4	7	4	1071.66	1078.5	1110.24	1082.82	1081.03	1053.44	1071.92	1074.76	1095.39	1131	1123.12	1098.33	1086.67	1072.35	1080.64	1117.4	1.04201	0.0522813	0.14082
Q6R891	Neurabin-2 OS=Mus musculus OX=10090 GN=Ppp1r9b PE=1 SV=1	2	3	2	165.021	180.141	151.491	145.291	153.181	161.88	162.031	146.95	177.06	186.022	178.092	167.935	165.138	153.301	161.546	177.195	1.15586	0.194337	0.328264
O55125	Protein NipSnap homolog 1 OS=Mus musculus OX=10090 GN=Nipsnap1 PE=1 SV=1	1	1	2	195.747	213.008	190.409	193.967	178.056	192.193	178.268	195.412	203.907	219.207	200.714	200.682	199.492	187.935	192.229	206.687	1.09978	0.259027	0.39845
P97792	Coxsackievirus and adenovirus receptor homolog OS=Mus musculus OX=10090 GN=Cxadr PE=1 SV=1	3	6	5	1060.85	1043.07	1159.17	1083.8	1070.05	1029.47	911.513	939.244	903.13	1110.2	1114	1074.59	1086.52	1060.86	917.833	1099.45	1.19788	0.000683691	0.00941278
Q922Y2	Tripartite motif-containing protein 59 OS=Mus musculus OX=10090 GN=Trim59 PE=1 SV=2	3	2	1	152.67	176.312	170.797	156.38	151.535	185.514	161.669	151.535	142.562	150.135	141.473	121.982	166.28	163.816	151.722	137.346	1.21066	0.109254	0.225141
Q9Z2M7	Phosphomannomutase 2 OS=Mus musculus OX=10090 GN=Pmm2 PE=1 SV=1	10	11	8	2604.16	2731.54	2820.73	2682.82	2621.71	2510.79	2591.69	2652.64	2564.21	2617.44	2490.23	2600.37	2717.35	2604.13	2602.59	2568.72	1.05786	0.20759	0.343102
Q3ULW8	Poly [ADP-ribose] polymerase OS=Mus musculus OX=10090 GN=Parp3 PE=1 SV=1	11	9	8	1326.83	1239.99	1273.23	1381.55	1363.37	1368.76	1344.98	1361.61	1423.3	1298.67	1387.06	1286.74	1279.52	1371.21	1376.22	1323.41	1.07558	0.0609258	0.155858
P24472	Glutathione S-transferase A4 OS=Mus musculus OX=10090 GN=Gsta4 PE=1 SV=3	9	9	8	1442.5	1575.56	1561.19	1483.76	1449.81	1488.85	1550.81	1433.7	1416.53	1481.56	1499.56	1492.07	1525.23	1474.04	1465.82	1491.04	1.04053	0.557446	0.658365
Q61234	Alpha-1-syntrophin OS=Mus musculus OX=10090 GN=Snta1 PE=1 SV=1	3	2	3	202.057	180.512	208.416	195.329	214.492	185.477	190.183	229.459	191.546	225.802	188.908	227.932	196.624	198.072	202.947	213.433	1.08548	0.698889	0.76845
P61804	Dolichyl-diphosphooligosaccharide--protein glycosyltransferase subunit DAD1 OS=Mus musculus OX=10090 GN=Dad1 PE=1 SV=3	1		2	411.431		442.147	451.906		429.217	425.954		479.9	455.288		393.316	426.513	440.415	452.123	423.169	1.06842	0.797544	0.84518
P54923	[Protein ADP-ribosylarginine] hydrolase OS=Mus musculus OX=10090 GN=Adprh PE=1 SV=1	13	18	15	3587.77	3674.71	3712.67	3589.3	3480.26	3446.78	3338.85	3379.81	3270.1	3601.88	3583.02	3688.25	3658.01	3504.92	3329.28	3624.09	1.09874	0.000771812	0.00995994
Q91VH6	Protein MEMO1 OS=Mus musculus OX=10090 GN=Memo1 PE=1 SV=1	8	6	7	887.113	906.845	898.565	940.794	857.452	873.222	731.972	816.327	792.888	882.283	861.538	877.487	897.471	889.767	779.573	873.724	1.15123	0.00661447	0.0371177
Q9JJN6	Beta-catenin-interacting protein 1 OS=Mus musculus OX=10090 GN=Ctnnbip1 PE=1 SV=1	1	2	1	193.016	203.198	199.587	184.902	174.062	202.485	202.496	198.488	193.592	208.534	213.201	193.284	198.555	186.787	198.159	204.827	1.09658	0.216798	0.354031
Q99J36	THUMP domain-containing protein 1 OS=Mus musculus OX=10090 GN=Thumpd1 PE=1 SV=1	2	7	4	516.137	508.561	517.949	514.734	499.208	496.124	488.224	492.256	516.515	509.805	528.874	498.312	514.199	503.29	498.844	512.176	1.03078	0.414127	0.541685
B1AVZ0	Uracil phosphoribosyltransferase homolog OS=Mus musculus OX=10090 GN=Uprt PE=1 SV=1	2	6	5	379.683	472.517	471.928	517.972	438.315	453.941	530.212	480.088	450.762	394.54	431.487	445.776	439.108	468.847	485.929	423.375	1.14775	0.323301	0.460146
Q6IFZ6	Keratin, type II cytoskeletal 1b OS=Mus musculus OX=10090 GN=Krt77 PE=1 SV=1	1	1	1	320.529	337.797	366.304	382.005	285.241	341.149	263.737	305.376	244.505	325.425	363.283	339.739	341.026	333.74	270.042	342.463	1.26818	0.0606102	0.15539
P47740	Fatty aldehyde dehydrogenase OS=Mus musculus OX=10090 GN=Aldh3a2 PE=1 SV=2	6	9	10	1163.66	1164.16	1253.93	1272.61	1250.42	1259.94	1352.78	1337.24	1202.3	1190.69	1227.91	1263.57	1193.17	1260.95	1295.64	1227.03	1.08587	0.173225	0.305147
Q9QUR7	Peptidyl-prolyl cis-trans isomerase NIMA-interacting 1 OS=Mus musculus OX=10090 GN=Pin1 PE=1 SV=1	5	7	9	1267.47	1266.01	1266.9	1253.26	1288.3	1315.63	1247.24	1301.43	1301.5	1397.58	1309.8	1281.5	1266.79	1285.47	1283.13	1328.72	1.04889	0.27772	0.414941
Q91YN9	BAG family molecular chaperone regulator 2 OS=Mus musculus OX=10090 GN=Bag2 PE=1 SV=1	5	8	4	1363.7	1309.48	1440.26	1342.35	1435.45	1341.57	1392.46	1419.51	1336.35	1416.65	1350.72	1396.97	1370.1	1372.43	1382.34	1387.83	1.01294	0.967843	0.973037
P41216	Long-chain-fatty-acid--CoA ligase 1 OS=Mus musculus OX=10090 GN=Acsl1 PE=1 SV=2	9	13	10	1420.28	1461.46	1455.19	1507.82	1476.6	1462.35	1581.7	1411.98	1417.85	1279.59	1439.35	1453.99	1445.53	1482.13	1468.45	1388.67	1.0673	0.430622	0.55474
Q9CYI0	Protein Njmu-R1 OS=Mus musculus OX=10090 PE=1 SV=2	4	2	2	211.064	215.157	198.34	217.733	200.549	212.147	206.2	197.599	214.738	202.577	224.268	212.348	208.063	210.02	206.06	212.88	1.0331	0.829787	0.868347
Q99L27	GMP reductase 2 OS=Mus musculus OX=10090 GN=Gmpr2 PE=1 SV=2	2	2	1	229.701	272.046	205.76	181.42	182.388	198.639	224.377	189.28	202.476	207.803	199.587	236.427	234.273	187.319	204.873	214.04	1.25066	0.111055	0.227452
Q9JJK2	LanC-like protein 2 OS=Mus musculus OX=10090 GN=Lancl2 PE=1 SV=1	5	8	5	650.222	677.694	685.039	691.268	642.175	654.327	672.364	691.876	661.844	666.516	668.625	679.159	670.816	662.264	675.247	671.41	1.0196	0.835211	0.872721
Q9Z110	Delta-1-pyrroline-5-carboxylate synthase OS=Mus musculus OX=10090 GN=Aldh18a1 PE=1 SV=2	27	32	35	7514.85	7216.94	7231.04	6365.98	6681.54	6274.41	6436.6	6248.77	6251.07	6616.11	6786.29	7177.02	7319.67	6438.3	6311.54	6855.82	1.15973	0.0012356	0.0135223
Q8BP92	Reticulocalbin-2 OS=Mus musculus OX=10090 GN=Rcn2 PE=1 SV=1	15	15	18	2812.31	2856.77	2755.66	2910.43	2789.27	2947.3	2789.72	2894.82	2808.16	2675.38	2647	2676.74	2807.94	2881.54	2830.53	2666.34	1.08071	0.00749164	0.0399213
O08810	116 kDa U5 small nuclear ribonucleoprotein component OS=Mus musculus OX=10090 GN=Eftud2 PE=1 SV=1	15	15	16	1753.11	1816.98	1771.78	1759.06	1739.02	1717.21	1950.98	1873.75	1848.76	1681.9	1715.31	1807.31	1780.42	1738.35	1890.67	1734.04	1.09033	0.0110475	0.0501771
Q9Z0Y1	Dynactin subunit 3 OS=Mus musculus OX=10090 GN=Dctn3 PE=1 SV=2	2	4	3	716.827	714.976	741.953	788.322	756.056	732.748	800.276	733.284	699.047	675.823	776.933	807.5	724.482	758.701	743.029	751.253	1.04723	0.817174	0.858601
P35285	Ras-related protein Rab-22A OS=Mus musculus OX=10090 GN=Rab22a PE=1 SV=2	1	1	1	114.795	108.929	118.861	142.433	109.151	118.384	96.9043	120.337	122.753	124.053	139.767	118.187	114.122	122.549	112.7	127.017	1.12703	0.495676	0.608424
Q9D8N2	Protein FAM45A OS=Mus musculus OX=10090 GN=Fam45a PE=1 SV=2	8	8	8	848.791	846.32	822.448	881.747	814.156	823.567	770.74	852.806	833.368	765.684	753.68	787.579	839.102	839.299	818.21	768.854	1.09162	0.0601093	0.154784
Q3UJD6	Ubiquitin carboxyl-terminal hydrolase 19 OS=Mus musculus OX=10090 GN=Usp19 PE=1 SV=1	1	6	8	257.741	309.629	322.613	375.919	329.935	313.222	364.404	328.403	314.415	291.825	321.923	339.639	295.281	338.682	335.092	317.174	1.14698	0.322327	0.459737
Q8BZA9	Fructose-2,6-bisphosphatase TIGAR OS=Mus musculus OX=10090 GN=Tigar PE=1 SV=1	1	3	1	76.1775	80.8118	84.931	75.917	76.2916	73.1467	75.502	77.7828	75.1757	85.6401	78.3505	79.9832	80.5606	75.1052	76.1447	81.2655	1.08202	0.0874499	0.195801
Q923B0	Gamma-glutamylaminecyclotransferase OS=Mus musculus OX=10090 GN=Ggact PE=1 SV=1	2	2	1	68.0333	68.7465	62.4877	67.7926	58.6131	50.9753	65.4102	72.4892	69.9443	63.9359	65.3232	81.7647	66.3624	58.7281	69.2188	69.8971	1.19018	0.237673	0.377504
P63328-2	Isoform 2 of Serine/threonine-protein phosphatase 2B catalytic subunit alpha isoform OS=Mus musculus OX=10090 GN=Ppp3ca	10	15	12	3262.51	3283.34	3276.2	3334.77	3249.66	3388.52	3354.89	3414.76	3367.47	3398.17	3402.57	3318.14	3274.01	3323.82	3378.94	3372.73	1.03205	0.0699851	0.169012
Q811U4	Mitofusin-1 OS=Mus musculus OX=10090 GN=Mfn1 PE=1 SV=3	5	2	4	438.81	456.98	446.156	480.328	458.465	481.729	450.272	441.91	422.396	442.62	454.675	461.749	447.253	473.386	438.036	452.946	1.0807	0.0349024	0.107202
P53810	Phosphatidylinositol transfer protein alpha isoform OS=Mus musculus OX=10090 GN=Pitpna PE=1 SV=2	11	14	14	2532.01	2557.32	2775.57	2911.57	2804.94	2669.31	2856.35	2998.17	2784.94	2567.62	2507.13	2637.74	2619.4	2793.51	2878.47	2570.28	1.1199	0.0271002	0.0918505
P06801	NADP-dependent malic enzyme OS=Mus musculus OX=10090 GN=Me1 PE=1 SV=2	29	26	26	5472.71	5564.27	5660.45	4985.37	5165.06	5085.57	5199.5	4950.23	4939	5349.78	5327.78	5322.33	5565.28	5078.13	5028.16	5333.28	1.10682	0.000615386	0.00897966
Q64669	NAD(P)H dehydrogenase [quinone] 1 OS=Mus musculus OX=10090 GN=Nqo1 PE=1 SV=3	7	14	9	1631.04	1774.93	1735.61	1657.74	1652.6	1639.79	1775.14	1632.69	1653.52	1640.83	1644.54	1675.84	1712.77	1650.03	1685.96	1653.66	1.03803	0.480937	0.597061
Q3UE37	Ubiquitin-conjugating enzyme E2 Z OS=Mus musculus OX=10090 GN=Ube2z PE=1 SV=2	9	7	6	1452.73	1445.12	1468.08	1468.69	1441.31	1386.18	1415.25	1487.78	1361.92	1370.19	1332.66	1490.69	1455.28	1431.65	1420.72	1396.25	1.04228	0.654584	0.733274
P61358	60S ribosomal protein L27 OS=Mus musculus OX=10090 GN=Rpl27 PE=1 SV=2	2	3	3	826.05	736.704	791.183	776.35	861.646	837.099	932.2	899.787	875.454	789.389	825.853	820.253	783.776	824.241	902.182	811.672	1.15107	0.0238795	0.0843528
Q8K0T2	Cytoplasmic dynein 2 light intermediate chain 1 OS=Mus musculus OX=10090 GN=Dync2li1 PE=1 SV=1	1	2	1	70.0678	65.3278	59.6292	57.8487	52.6474	63.8349	52.7089	62.2192	58.5507	57.9291	58.36	56.5397	64.8672	57.9308	57.6917	57.6043	1.12608	0.232515	0.372063
Q9CPQ8	ATP synthase subunit g, mitochondrial OS=Mus musculus OX=10090 GN=Atp5l PE=1 SV=1	3	4	4	485.643	498.919	458.428	410.182	396.279	441.456	433.361	385.454	409.422	431.016	479.55	450.895	480.699	415.548	408.945	453.386	1.17546	0.0177042	0.0695487
Q9QYI3	DnaJ homolog subfamily C member 7 OS=Mus musculus OX=10090 GN=Dnajc7 PE=1 SV=2	7	9	8	1382.07	1487.56	1445.2	1535.18	1464.36	1401.78	1511.07	1414.92	1480.16	1330.23	1391.71	1431.41	1437.62	1466.09	1468.17	1383.82	1.06095	0.27858	0.41596
Q9D0F9	Phosphoglucomutase-1 OS=Mus musculus OX=10090 GN=Pgm1 PE=1 SV=4	22	30	28	8523.87	8879.86	8841.45	9101.47	8867.4	9181.81	9332.24	9455.95	9099.19	8752.43	8506.8	8587.56	8746.93	9049.24	9294.61	8614.99	1.07889	0.0046879	0.0300142
Q9JKP5	Muscleblind-like protein 1 OS=Mus musculus OX=10090 GN=Mbnl1 PE=1 SV=1	5	7	4	936.38	774.985	795.629	887.679	992.74	940.857	909.84	941.642	1022.41	931.903	956.436	906.903	832.694	939.446	956.81	931.528	1.14905	0.12008	0.240263
Q9Z2P8	Vesicle-associated membrane protein 5 OS=Mus musculus OX=10090 GN=Vamp5 PE=1 SV=1	1	4	2	201.464	184.957	216.894	209.655	202.281	190.518	172.788	188.586	165.353	182.927	191.009	194.068	200.681	200.662	175.312	189.276	1.14471	0.0700008	0.169012
Q99MR3	Solute carrier family 12 member 9 OS=Mus musculus OX=10090 GN=Slc12a9 PE=1 SV=2	6	7	3	416.231	435.29	409.192	382.182	386.859	418.153	369.719	358.218	365.114	422.826	410.59	398.499	420.094	395.414	364.32	410.519	1.15309	0.00397834	0.0269675
Q9DBG3	AP-2 complex subunit beta OS=Mus musculus OX=10090 GN=Ap2b1 PE=1 SV=1	37	23	25	5852.17	5846.25	6000.58	6056.48	6131.53	5892.11	6162.5	5953.29	6089.28	5704.57	5844.64	5793.75	5899.24	6025.87	6067.74	5780.69	1.04966	0.0265427	0.0904847
O88630	Golgi SNAP receptor complex member 1 OS=Mus musculus OX=10090 GN=Gosr1 PE=1 SV=2	4	5	2	385.259	361.461	407.315	369.202	404.069	369.775	389.561	392.544	387.977	369.497	355.445	348.452	384.221	380.673	390.023	357.691	1.09039	0.140656	0.264273
Q9Z2A7	Diacylglycerol O-acyltransferase 1 OS=Mus musculus OX=10090 GN=Dgat1 PE=1 SV=1	1	1	2	153.106	172.736	143.466	158.158	151.449	140.387	173.624	155.827	191.075	139.909	144.785	149.87	155.97	149.817	172.91	144.798	1.19415	0.0986838	0.211319
Q80Y81	Zinc phosphodiesterase ELAC protein 2 OS=Mus musculus OX=10090 GN=Elac2 PE=1 SV=1	9	10	12	1380.15	1439.03	1455.91	1370.41	1366.63	1396.86	1453.48	1411.83	1390.16	1440.01	1426.57	1401.13	1424.65	1377.9	1418.25	1422.48	1.03393	0.220147	0.357053
Q9R0G6	Cartilage oligomeric matrix protein OS=Mus musculus OX=10090 GN=Comp PE=1 SV=2	4	4	1	335.76	287.013	319.216	305.595	357.057	307.319	327.614	312.223	364.857	334.551	347.226	312.128	313.332	322.471	334.182	330.981	1.06654	0.739393	0.79981
O09061	Proteasome subunit beta type-1 OS=Mus musculus OX=10090 GN=Psmb1 PE=1 SV=1	10	8	9	2415.48	2427.73	2484.42	2331.41	2376.69	2338.44	2401.09	2271.67	2274.15	2466.13	2538.03	2517.12	2442.36	2348.76	2314.86	2506.91	1.08297	0.00411769	0.0276718
P19253	60S ribosomal protein L13a OS=Mus musculus OX=10090 GN=Rpl13a PE=1 SV=4	6	7	7	3849.49	3330.8	3358.63	3493.43	3899.92	3684.96	3860.33	4028.49	4107.53	3772.39	3716.44	3824.52	3505.14	3689.04	3997.44	3770.86	1.14045	0.0796509	0.183695
O55022	Membrane-associated progesterone receptor component 1 OS=Mus musculus OX=10090 GN=Pgrmc1 PE=1 SV=4	4	5	9	1346.32	1340.28	1349.11	1232.74	1288.66	1251.01	1233.7	1228.97	1275.3	1381.96	1336.8	1319.3	1345.23	1257.26	1245.82	1345.77	1.08023	0.0014999	0.0149798
Q3TIV9	AP complex subunit sigma OS=Mus musculus OX=10090 GN=Ap1s2 PE=1 SV=1	2	1	1	224.904	204.137	214.437	196.839	214.259	203.15	205.25	225.302	208.599	227.137	210.433	227.944	214.325	204.624	212.873	221.688	1.08339	0.289608	0.426849
Q9CV28	Ubiquitin carboxyl-terminal hydrolase MINDY-3 OS=Mus musculus OX=10090 GN=MINDY3 PE=1 SV=2	4	4	4	205.816	231.947	227.566	228.134	213.446	224.951	227.398	243.68	223.137	244.887	217.162	230.58	221.475	222.087	231.238	230.599	1.04408	0.638882	0.720049
O35516	Neurogenic locus notch homolog protein 2 OS=Mus musculus OX=10090 GN=Notch2 PE=1 SV=1	2	2	3	183.058	198.465	205.733	202.45	184.654	167.69	192.058	188.076	180.895	203.225	209.597	226.473	195.52	184.386	186.952	212.875	1.15451	0.0917465	0.202041
P54823	Probable ATP-dependent RNA helicase DDX6 OS=Mus musculus OX=10090 GN=Ddx6 PE=1 SV=1	10	12	17	1796.4	1651.27	1651.2	1757.22	1882.29	1789.51	1804.37	1972.43	2028.12	1934.8	1786.81	1823.98	1698.27	1808.9	1932.6	1847.47	1.13798	0.05758	0.150079
P36916	Guanine nucleotide-binding protein-like 1 OS=Mus musculus OX=10090 GN=Gnl1 PE=1 SV=4	9	10	8	1168.84	1218.57	1225	1253.15	1158.7	1222.28	1207.82	1195.94	1166.83	1130.06	1186.66	1145.76	1203.87	1210.73	1190.07	1153.91	1.04924	0.240364	0.380442
Q9QYJ3	DnaJ homolog subfamily B member 1 OS=Mus musculus OX=10090 GN=Dnajb1 PE=1 SV=3	10	7	10	1451.88	1543.03	1478.47	1608.79	1584.83	1586.68	1401.84	1256.68	1396.66	1397.87	1475.85	1398.58	1490.64	1593.4	1350.01	1423.63	1.18028	0.00426394	0.0282899
Q99NH0	Ankyrin repeat domain-containing protein 17 OS=Mus musculus OX=10090 GN=Ankrd17 PE=1 SV=2	8	6	8	354.608	337.198	310.296	350.943	374.26	378.017	321.821	379.521	369.91	360.289	296.681	329.437	333.531	367.542	356.163	327.771	1.12134	0.288902	0.426076
Q9DC61	Mitochondrial-processing peptidase subunit alpha OS=Mus musculus OX=10090 GN=Pmpca PE=1 SV=1	7	8	9	1247.08	1328.66	1355.57	1339.31	1276.77	1354.31	1318.3	1296.44	1211.75	1319.14	1321.96	1302.2	1309.62	1323.04	1274.66	1314.4	1.03795	0.603107	0.693751
Q8BGW1	Alpha-ketoglutarate-dependent dioxygenase FTO OS=Mus musculus OX=10090 GN=Fto PE=1 SV=1	10	11	10	1284.15	1290.93	1252.23	1275.02	1234.33	1293.07	1142.18	1219.06	1164.13	1294.28	1251.33	1286.21	1275.66	1267.24	1174.68	1277.14	1.08722	0.00688077	0.0380964
Q60872	Eukaryotic translation initiation factor 1A OS=Mus musculus OX=10090 GN=Eif1a PE=2 SV=3	4	4	6	1246.87	1190.02	1131.61	1230.34	1296.03	1222.55	1206.31	1176.49	1298.88	1143.15	1164.13	1173.62	1188.57	1249.21	1226.14	1160.23	1.07669	0.18186	0.313982
Q91W89	Alpha-mannosidase 2C1 OS=Mus musculus OX=10090 GN=Man2c1 PE=1 SV=1	1	3	3	174.547	164.304	157.546	141.972	152.117	155.19	139.725	145.175	148.882	166.627	161.276	161.255	165.319	149.651	144.545	163.033	1.14372	0.00789855	0.0411533
Q6PHZ2	Calcium/calmodulin-dependent protein kinase type II subunit delta OS=Mus musculus OX=10090 GN=Camk2d PE=1 SV=1	9	12	18	2232.31	2135.8	2111.15	2258.77	2317.8	2315.52	2267.01	2273.9	2372.47	2088.61	2119.2	2047.56	2159.12	2297.2	2303.96	2084.91	1.10506	0.00145073	0.0146449
Q8BH55	Threonine synthase-like 1 OS=Mus musculus OX=10090 GN=Thnsl1 PE=1 SV=1	1	2	3	77.0671	68.7301	65.0872	75.9132	76.3648	73.8977	54.6858	62.2342	73.3208	65.0304	65.3674	60.3908	70.1192	75.3842	62.9569	63.555	1.19739	0.107243	0.223256
Q8BU31	Ras-related protein Rap-2c OS=Mus musculus OX=10090 GN=Rap2c PE=1 SV=1	1	3	1	395.859	374.084	358.825	359.405	355.25	346.631	351.543	355.513	393.622	366.143	388.104	373.872	375.951	353.722	366.413	375.93	1.06284	0.331762	0.468778
F6RPJ9	Insulin-degrading enzyme (Fragment) OS=Mus musculus OX=10090 GN=Ide PE=1 SV=1	18	23	27	5336.11	5582.43	5679.3	5362.87	5168.11	5318.8	5448.35	5297	5116.39	5457.01	5556.81	5489.87	5530.71	5282.59	5285.5	5501.07	1.04697	0.0960648	0.208608
Q5SS55	EH domain-binding protein 1 (Fragment) OS=Mus musculus OX=10090 GN=Ehbp1 PE=1 SV=1	1	1	1	27.8051	23.7016	21.8357	27.1004	29.6321	29.3828	20.5188	24.9426	26.7722	25.5382	22.6863	22.9719	24.3234	28.6821	23.9291	23.6983	1.2103	0.143551	0.26771
Q62167	ATP-dependent RNA helicase DDX3X OS=Mus musculus OX=10090 GN=Ddx3x PE=1 SV=3	18	20	15	3389.41	3258.4	3105.94	3249.97	3563.53	3373.6	3263.1	3289.38	3553.44	3229	3020.17	3098.48	3249.18	3393.26	3366.13	3114.7	1.08944	0.135831	0.257792
Q8JZN7	Mitochondrial Rho GTPase 2 OS=Mus musculus OX=10090 GN=Rhot2 PE=1 SV=1	5	4	2	431.67	422.998	388.856	419.523	390.882	437.144	361.747	403.922	397.296	414.96	410.096	404.604	414.088	415.408	387.203	409.865	1.07284	0.338729	0.47603
Q8BK08	Transmembrane protein 11, mitochondrial OS=Mus musculus OX=10090 GN=Tmem11 PE=1 SV=1	1	2	3	75.9582	51.0925	48.1063	23.6832	41.5658	47.9033	40.9446	46.4567	48.1591	55.0374	56.5084	51.4547	57.1537	36.1283	45.079	54.2915	1.58197	0.135889	0.257799
Q9D824	Pre-mRNA 3'-end-processing factor FIP1 OS=Mus musculus OX=10090 GN=Fip1l1 PE=1 SV=1	1	1	1	139.852	124.694	118.503	113.803	112.782	130.768	122.956	127.158	122.995	115.399	127.375	119.744	127.375	118.841	124.354	120.739	1.07181	0.591597	0.685222
Q9D0L8	mRNA cap guanine-N7 methyltransferase OS=Mus musculus OX=10090 GN=Rnmt PE=1 SV=1	4	4	7	738.709	656.139	725.194	710.749	778.706	689.261	729.788	779.38	737.172	683.764	648.785	711.385	705.734	725.256	748.465	680.828	1.09935	0.244938	0.384965
Q9D6H2	Intraflagellar transport protein 25 homolog OS=Mus musculus OX=10090 GN=Hspb11 PE=1 SV=2	1	1	1	78.8924	89.6067	94.527	92.8069	93.902	73.7919	85.0747	84.1411	75.2837	85.8116	74.9358	98.9831	87.4266	86.3153	81.3773	86.0199	1.07434	0.867639	0.897531
Q9CXY6	Interleukin enhancer-binding factor 2 OS=Mus musculus OX=10090 GN=Ilf2 PE=1 SV=1	7	9	10	752.386	741.233	756.485	759.481	791.118	762.328	826.328	827.951	916.728	928.53	906.423	831.184	750.007	770.844	855.984	887.717	1.18361	0.00383462	0.0264138
Q6PD26	GPI transamidase component PIG-S OS=Mus musculus OX=10090 GN=Pigs PE=1 SV=3	5	6	7	763.757	707.725	762.013	685.285	736.719	722.978	747.347	727.131	710.742	773.15	797.965	773.806	744.036	714.66	728.253	781.556	1.0936	0.0462733	0.130102
Q6PIU9	Uncharacterized protein FLJ45252 homolog OS=Mus musculus OX=10090 PE=1 SV=2	4	7	7	760.021	794.988	740.321	842.751	862.682	765.698	812.76	836.406	852.052	799.877	721.333	857.338	764.778	822.626	833.582	790.868	1.08997	0.320289	0.45797
Q60710	Deoxynucleoside triphosphate triphosphohydrolase SAMHD1 OS=Mus musculus OX=10090 GN=Samhd1 PE=1 SV=3	23	28	22	5395.01	5557.99	5438.74	5954.65	5668.01	6021.28	5889.33	6000.12	5761.86	5325.37	5338.24	5342.49	5463.48	5879.3	5882.96	5335.37	1.10264	0.000643924	0.0091676
Q9CYZ2	Tumor protein D54 OS=Mus musculus OX=10090 GN=Tpd52l2 PE=1 SV=1	9	11	10	2206.58	2332.48	2241.75	2227.98	2054.02	2249.12	2106.78	2093.99	2167.47	2222.11	2282.97	2105.11	2259.65	2175.25	2122.51	2202.15	1.06462	0.281669	0.419003
Q9CQJ2	PIH1 domain-containing protein 1 OS=Mus musculus OX=10090 GN=Pih1d1 PE=1 SV=1	3	5	3	535.088	550.167	505.269	546.919	524.148	575.956	535.129	506.338	561.654	498.378	534.862	472.636	529.843	548.599	533.895	501.313	1.09432	0.26198	0.400927
E9Q4X2	UDP-glucose glycoprotein glucosyltransferase 2 OS=Mus musculus OX=10090 GN=Uggt2 PE=1 SV=1	2	2	1	262.784	257.973	224.943	226.474	231.063	229.605	235.547	216.819	265.392	214.23	233.181	219.096	247.979	229.039	238.426	222.025	1.1169	0.307439	0.444733
A2A6A1	G patch domain-containing protein 8 OS=Mus musculus OX=10090 GN=Gpatch8 PE=1 SV=1	1		5	301.393		310.261	356.149		330.875	326.848		295.697	268.66		316.218	305.795	343.279	310.882	291.47	1.17775	0.29265	0.42963
Q62084	Protein phosphatase 1 regulatory subunit 14B OS=Mus musculus OX=10090 GN=Ppp1r14b PE=1 SV=2	1		4	156.75		162.939	161.849		163.756	180.837		168.189	168.42		172.972	159.814	162.8	174.399	170.681	1.09126	0.130876	0.251034
Q60848	Lymphocyte-specific helicase OS=Mus musculus OX=10090 GN=Hells PE=1 SV=2	5	7	8	1623.78	1278.45	1414.01	1420.4	1606.38	1547.12	1414.05	1598	1538.62	1519.58	1494.98	1478.06	1431.82	1522.63	1514.92	1497.44	1.06342	0.744864	0.804275
Q8K298	Anillin OS=Mus musculus OX=10090 GN=Anln PE=1 SV=2	3	4	7	750.287	679.518	736.428	732.481	805.575	749.199	831.279	823.789	844.891	699.092	704.256	682.621	721.417	761.786	833.274	695.262	1.1985	0.00187363	0.0170409
Q91VR8	Protein BRICK1 OS=Mus musculus OX=10090 GN=Brk1 PE=1 SV=1	3	2	3	654.742	605.17	657.476	670.362	703.128	641.889	555.022	596.997	638.187	634.821	609.652	577.395	638.669	671.327	595.768	606.832	1.12683	0.092253	0.202775
P70362	Ubiquitin recognition factor in ER-associated degradation protein 1 OS=Mus musculus OX=10090 GN=Ufd1 PE=1 SV=2	5	7	8	1676.35	1620.76	1677.43	1556.22	1581.82	1619.53	1625.57	1582.25	1575.43	1682.27	1755.6	1668.04	1657.96	1585.64	1594.26	1701.54	1.07309	0.0109502	0.0499654
Q8BWW9	Serine/threonine-protein kinase N2 OS=Mus musculus OX=10090 GN=Pkn2 PE=1 SV=3	20	17	12	2934.96	2918.2	2849.71	2960.92	2866.7	2882.77	2763.72	2675.58	2843.08	2767.41	2966.53	2851.45	2900.72	2903.18	2759.95	2860.64	1.0519	0.132487	0.252898
Q9EPL9	Peroxisomal acyl-coenzyme A oxidase 3 OS=Mus musculus OX=10090 GN=Acox3 PE=1 SV=2	4	2	4	358.589	385.593	342.566	318.965	328.245	338.188	329.63	327.979	314.789	343.011	308.378	354.653	361.818	328.372	324.064	334.759	1.1165	0.107809	0.223343
Q9D7X3	Dual specificity protein phosphatase 3 OS=Mus musculus OX=10090 GN=Dusp3 PE=1 SV=1	4	3	3	226.464	226.278	220.247	225.514	218.426	226.397	229.003	252.698	225.963	224.551	208.13	232.925	224.311	223.417	235.592	221.627	1.06301	0.37055	0.504656
P61967	AP-1 complex subunit sigma-1A OS=Mus musculus OX=10090 GN=Ap1s1 PE=1 SV=1	3	5	4	424.029	445.69	432.948	457.331	407.703	428.567	439.513	441.605	410.369	398.49	424.364	447.478	434.131	430.723	430.256	422.97	1.02639	0.919973	0.9382
P58802	TBC1 domain family member 10A OS=Mus musculus OX=10090 GN=Tbc1d10a PE=1 SV=1	4	4	4	215.891	203.956	201.154	214.794	205.299	207.498	185.409	217.342	201.144	214.851	204.347	221.148	206.903	209.158	200.875	213.336	1.06203	0.543886	0.647322
Q8R2W9	Pantothenate kinase 3 OS=Mus musculus OX=10090 GN=Pank3 PE=2 SV=1	1	2	2	147.296	137.951	123.531	147.955	140.433	154.043	110.141	128.941	140.157	128.33	126.397	115.99	135.903	147.372	125.792	123.451	1.19376	0.10817	0.223927
Q8BP47	Asparagine--tRNA ligase, cytoplasmic OS=Mus musculus OX=10090 GN=Nars PE=1 SV=2	15	24	24	5985.8	5868.34	5763.34	5373.24	5437.36	5126.21	5016.93	5100.58	5119.37	5475.86	5445.54	5842.9	5871.79	5310.56	5078.76	5585.22	1.15615	0.00099629	0.0118142
P62897	Cytochrome c, somatic OS=Mus musculus OX=10090 GN=Cycs PE=1 SV=2	12	13	14	2326.64	2402.16	2453.19	2519.18	2394.46	2473.25	2616.58	2531.66	2387.33	2108.54	2242.66	2257.18	2393.43	2461.76	2510.06	2201.76	1.14002	0.00829444	0.0424406
P53762	Aryl hydrocarbon receptor nuclear translocator OS=Mus musculus OX=10090 GN=Arnt PE=1 SV=3			2			227.7			215.329			218.569			212.909	227.7	215.329	218.569	212.909	1.06947
Q8BIJ7	RUN and FYVE domain-containing protein 1 OS=Mus musculus OX=10090 GN=Rufy1 PE=1 SV=1	1	3	3	254.462	281.257	278.948	238.542	239.797	253.48	286.806	265.06	254.389	272.093	265.79	265.086	271.279	243.847	268.417	267.638	1.1125	0.0643383	0.160897
Q9DAK9	14 kDa phosphohistidine phosphatase OS=Mus musculus OX=10090 GN=Phpt1 PE=1 SV=1	2	5	5	1001.7	977.101	1018.44	1010.47	1028.59	1038.52	1015.56	1035.91	1010.7	991.317	977.446	951.385	998.935	1025.79	1020.66	973.241	1.054	0.0230803	0.0825162
Q99KE1	NAD-dependent malic enzyme, mitochondrial OS=Mus musculus OX=10090 GN=Me2 PE=1 SV=1	10	11	13	1114.48	1130.77	1154.05	1089.72	1127.37	1128.05	1165.15	1152.94	1106.58	1159.47	1117.74	1140.15	1132.98	1114.9	1141.28	1138.99	1.02365	0.548398	0.650468
Q9D0D5	General transcription factor IIE subunit 1 OS=Mus musculus OX=10090 GN=Gtf2e1 PE=1 SV=1	3	5	5	296.959	321.491	326.942	345.719	342.787	360.968	345.852	347.343	299.894	336.803	313.712	337.53	314.856	349.735	330.272	329.159	1.11078	0.218808	0.355851
Q8BKE9	Intraflagellar transport protein 74 homolog OS=Mus musculus OX=10090 GN=Ift74 PE=1 SV=2	2	2	1	253.529	240.308	231.587	236.671	235.585	222.14	212.473	225.67	240.276	219.345	220.456	228.017	241.641	231.37	225.855	222.573	1.08567	0.184733	0.317421
P70398	Probable ubiquitin carboxyl-terminal hydrolase FAF-X OS=Mus musculus OX=10090 GN=Usp9x PE=1 SV=2	25	28	38	4639.45	4854.7	4676.02	4704.24	4712.6	4727.16	4567.83	4582.88	4594.12	4744.48	4505.82	4658.7	4722.46	4714.66	4581.6	4635.28	1.03075	0.200028	0.333903
Q99JY4	TraB domain-containing protein OS=Mus musculus OX=10090 GN=Trabd PE=1 SV=1	1	1	1	31.7281	24.5089	21.7425	10.7415	21.475	21.6921	30.4271	20.6155	22.2427	15.6188	21.916	22.8381	25.6661	17.1041	24.0739	19.8468	1.50058	0.300884	0.438501
P70336	Rho-associated protein kinase 2 OS=Mus musculus OX=10090 GN=Rock2 PE=1 SV=1	37	47	40	8135.1	8016.26	7823.71	9062.37	8713.7	9401.08	8842.49	9196.88	8949.51	7826.72	7939.84	7692.39	7990.66	9054.7	8995.07	7818.99	1.15804	0.000124438	0.00342863
Q8K2A1	PTB domain-containing engulfment adapter protein 1 OS=Mus musculus OX=10090 GN=Gulp1 PE=1 SV=1	6	4	5	812.153	768.765	734.17	802.303	741.698	755.479	622.118	680.644	731.347	704.727	750.194	720.304	771.038	766.06	676.558	724.831	1.13965	0.0602525	0.155009
Q8R3H9	Tetratricopeptide repeat protein 4 OS=Mus musculus OX=10090 GN=Ttc4 PE=1 SV=1	2	3	3	480.526	486.175	496.794	470.703	453.152	466.379	483.583	482.527	465.341	470.588	483.546	476.886	487.785	463.351	477.076	476.977	1.05273	0.0516324	0.139656
Q9ERR7	Selenoprotein F OS=Mus musculus OX=10090 GN=Selenof PE=1 SV=3	6	4	5	475.022	506.251	506.008	468.07	455.797	451.601	450.25	448.911	461.97	503.183	485.566	476.947	495.54	458.436	453.672	488.444	1.09229	0.00643736	0.0363284
Q9R008	Mevalonate kinase OS=Mus musculus OX=10090 GN=Mvk PE=1 SV=1	1	2	2	122.659	104.711	95.5186	93.6854	95.4241	89.4167	92.5571	80.4126	79.4102	59.7754	88.1285	104.331	107.052	92.8075	83.9209	81.9126	1.3069	0.24801	0.387485
Q8BH58	TIP41-like protein OS=Mus musculus OX=10090 GN=Tiprl PE=1 SV=1	11	8	13	1238.35	1263.74	1309.95	1369.98	1296.42	1272.67	1284.37	1338.93	1341.16	1322.87	1316.49	1291.8	1270.34	1312.37	1321.23	1310.32	1.04006	0.366523	0.501986
Q9ER39	Torsin-1A OS=Mus musculus OX=10090 GN=Tor1a PE=1 SV=1		2	4		202.413	207.766		219.395	203.292		218.59	222.254		183.843	190.93	205.072	211.19	220.414	187.353	1.17647	0.028543	0.0946664
Q80TQ2	Ubiquitin carboxyl-terminal hydrolase CYLD OS=Mus musculus OX=10090 GN=Cyld PE=1 SV=2	3	2	7	351.472	345.431	321.746	332.312	340.528	348.422	308.016	335.127	343.182	344.307	315.021	322.757	339.304	340.357	328.424	327.13	1.04043	0.604321	0.694295
Q99JZ4	GTP-binding protein SAR1a OS=Mus musculus OX=10090 GN=Sar1a PE=1 SV=1	2	11	11	882.583	906.268	972.484	928.105	981.888	869.297	889.156	921.461	822.272	933.206	823.433	968.997	919.669	925.286	876.644	906.378	1.05549	0.747304	0.806165
Q8BGC0	HIV Tat-specific factor 1 homolog OS=Mus musculus OX=10090 GN=Htatsf1 PE=1 SV=1	1		7	443.92		414.477	391.189		371.445	375.057		376.388	432.157		480.013	428.946	381.189	375.722	455.457	1.21222	0.0403091	0.11848
P16045	Galectin-1 OS=Mus musculus OX=10090 GN=Lgals1 PE=1 SV=3	22	23	18	27388.4	28087.9	28249	26406.2	26353.2	26498	27341.5	27214.9	25165.6	27015.1	26495.2	28238.6	27905.9	26419.1	26554.9	27239.9	1.05628	0.168638	0.299318
P58021	Transmembrane 9 superfamily member 2 OS=Mus musculus OX=10090 GN=Tm9sf2 PE=1 SV=1	5	5	5	492.802	498.151	484.442	507.315	472.277	489.254	459.654	444.974	450.157	465.61	509.98	501.53	491.766	489.407	451.554	491.991	1.08955	0.0281879	0.0938395
Q9JL35	High mobility group nucleosome-binding domain-containing protein 5 OS=Mus musculus OX=10090 GN=Hmgn5 PE=1 SV=2	1	1	2	375.877	287.865	295.791	350.82	376.627	353.572	307.289	348.045	398.478	312.455	333.903	298.598	317.497	360.156	349.297	314.653	1.14461	0.345489	0.482058
Q8K296	Myotubularin-related protein 3 OS=Mus musculus OX=10090 GN=Mtmr3 PE=1 SV=2	2	3	2	222.621	212.03	204.779	188.011	202.795	192.213	186.472	194.506	208.51	210.255	198.028	201.857	213.018	194.241	196.287	203.316	1.09667	0.10752	0.223337
Q80VP5	Probable peptide chain release factor C12orf65 homolog, mitochondrial OS=Mus musculus OX=10090 PE=1 SV=1		2			72.1502			52.2978			62.4716			61.9024		72.1502	52.2978	62.4716	61.9024	1.3796
Q8R1G2	Carboxymethylenebutenolidase homolog OS=Mus musculus OX=10090 GN=Cmbl PE=1 SV=1	4	1	3	132.643	154.904	136.482	160.929	152.292	151.694	157.515	131.122	151.563	126.092	138.861	137.44	141.018	154.915	146.284	134.007	1.15602	0.162015	0.291317
Q8R242	Di-N-acetylchitobiase OS=Mus musculus OX=10090 GN=Ctbs PE=1 SV=2	3	1		174.446	179.697		187.975	184.516		212.828	206.745		184.756	189.048		177.052	186.238	209.765	186.89	1.18476	0.00300596	0.0227633
Q99M87	DnaJ homolog subfamily A member 3, mitochondrial OS=Mus musculus OX=10090 GN=Dnaja3 PE=1 SV=1	2	2	2	197.474	189.592	193.818	172.59	193.257	180.097	174.015	193.81	185.679	193.949	161.37	178.435	193.601	181.783	184.321	177.418	1.09122	0.412542	0.541425
Q8K4B0	Metastasis-associated protein MTA1 OS=Mus musculus OX=10090 GN=Mta1 PE=1 SV=1	5		1	106.852		72.7628	97.0214		105.718	98.6468		128.377	111.546		107.209	88.175	101.276	112.534	109.356	1.27626	0.537465	0.642215
Q80ZV0	Ribonuclease H2 subunit B OS=Mus musculus OX=10090 GN=Rnaseh2b PE=1 SV=2	5	2	5	733.1	585.64	687.083	727.444	772.386	726.684	706.069	863.715	750.014	674.434	619.306	677.266	665.683	741.868	770.482	656.449	1.17371	0.115528	0.233449
Q6A068	Cell division cycle 5-like protein OS=Mus musculus OX=10090 GN=Cdc5l PE=1 SV=2	1	3	6	108.131	141.042	124.432	141.704	121.415	131.069	147.362	138.608	150.65	150.208	146.34	141.254	123.806	131.135	145.45	145.888	1.17836	0.0975831	0.210248
Q5SXY1	Cytospin-B OS=Mus musculus OX=10090 GN=Specc1 PE=1 SV=2	1	2	3	150.425	149.728	143.241	128.612	137.93	121.343	127.128	133.096	141.095	151.746	137.156	152.232	147.762	129.117	133.651	146.874	1.1444	0.031215	0.0995987
Q8K245	UV radiation resistance associated protein OS=Mus musculus OX=10090 GN=Uvrag PE=1 SV=2	2	1	3	463.879	500.895	452.613	473.235	455.157	511.012	495.049	509.397	489.197	457.648	424.362	436.988	472.019	479.243	497.809	439.453	1.13279	0.0515745	0.139639
Q8CG47	Structural maintenance of chromosomes protein 4 OS=Mus musculus OX=10090 GN=Smc4 PE=1 SV=1	23	35	27	6501.9	6117.1	6017.7	6254.15	6441.84	6375.62	6055.81	6248.54	6262.69	6062.63	6067.01	6218.48	6208.77	6356.73	6188.29	6115.62	1.03943	0.343622	0.480026
E9Q9Q2	R3H domain-containing 1 OS=Mus musculus OX=10090 GN=R3hdm1 PE=1 SV=1	1	3	3	178.83	191.405	202.379	187.264	205.815	205.13	205.448	206.368	191.341	220.122	188.075	192.814	190.628	199.214	200.933	199.853	1.05406	0.723837	0.787779
Q9QWF0	Chromatin assembly factor 1 subunit A OS=Mus musculus OX=10090 GN=Chaf1a PE=1 SV=1	1	4	4	476.185	420.648	400.518	453.615	446.63	433.929	334.316	396.64	461.689	455.334	455.533	423.314	431.293	444.65	394.125	444.465	1.12819	0.413761	0.541556
Q99L85	Elongator complex protein 5 OS=Mus musculus OX=10090 GN=Elp5 PE=2 SV=1	1	1	2	171.686	189.636	175.756	201.867	186.137	190.441	186.429	179.772	178.358	163.406	167.844	178.833	178.864	192.702	181.486	169.905	1.13417	0.0395031	0.117332
P97346	Nucleoredoxin OS=Mus musculus OX=10090 GN=Nxn PE=1 SV=1	9	13	8	861.399	872.674	869.35	803.631	803.54	778.051	838.46	766.764	806.26	803.874	864.385	853.703	867.795	794.982	803.291	840.235	1.09159	0.0292552	0.0954922
Q9CS42	Ribose-phosphate pyrophosphokinase 2 OS=Mus musculus OX=10090 GN=Prps2 PE=1 SV=4	4	14	6	2066.49	2117.64	2062.22	2196.81	2057.68	2111.79	2110.71	2081.09	2193.58	1886.04	2003.64	1892.45	2081.97	2121.33	2127.93	1926.63	1.10448	0.00822604	0.0423415
Q9CQ60	6-phosphogluconolactonase OS=Mus musculus OX=10090 GN=Pgls PE=1 SV=1	9	8	11	1658.16	1795.91	1661.46	1695.56	1623.68	1700.91	1845.54	1735.46	1815.5	1647.99	1692.19	1669.36	1703.99	1673.01	1798.23	1669.75	1.07694	0.0636061	0.160264
Q8BTW3	Exosome complex component MTR3 OS=Mus musculus OX=10090 GN=Exosc6 PE=1 SV=1	2	3	2	395.198	388.951	341.047	353.699	368.967	372.165	362.357	370.561	350.095	377.112	359.889	425.06	374.261	364.854	360.906	386.393	1.07062	0.57046	0.668845
Q921E2	Ras-related protein Rab-31 OS=Mus musculus OX=10090 GN=Rab31 PE=1 SV=1	4	5	3	288.357	322.292	321.936	274.178	348.486	343.959	499.431	353.92	335.6	289.73	326.997	350.201	310.444	320.313	390.003	321.33	1.25627	0.249295	0.388844
Q9CWK8	Sorting nexin-2 OS=Mus musculus OX=10090 GN=Snx2 PE=1 SV=2	9	14	15	2693.88	2773.69	2786.63	2808.06	2772.76	2762.36	2872	2845.82	2809.07	2715.6	2697.28	2731.49	2751.09	2780.99	2842.18	2714.75	1.04694	0.00904675	0.0446052
A6H8H2	DENN domain-containing protein 4C OS=Mus musculus OX=10090 GN=Dennd4c PE=1 SV=1	12	13	6	1104.25	1119.94	1052.21	1226.42	1193.16	1255.12	1153.14	1178.65	1188.64	1080.64	1072.71	1068.48	1091.75	1224.64	1173.38	1073.93	1.14033	0.000278745	0.00590788
Q8BMJ2	Leucine--tRNA ligase, cytoplasmic OS=Mus musculus OX=10090 GN=Lars PE=1 SV=2	47	51	54	15640.4	15688.8	15181.9	13863.9	14249.3	13524.1	12966.9	12731	13176.4	14462.7	14264.8	15051.5	15502	13875.9	12956.8	14589.2	1.19644	7.21777e-05	0.00252299
Q6PDG5	SWI/SNF complex subunit SMARCC2 OS=Mus musculus OX=10090 GN=Smarcc2 PE=1 SV=2	6	5	8	547.701	434.992	498.975	514.256	600.835	529.976	529.142	580.264	558.453	564.275	539.283	567.97	491.701	547.096	555.556	557.029	1.13286	0.219804	0.356868
Q91W61	F-box/LRR-repeat protein 15 OS=Mus musculus OX=10090 GN=Fbxl15 PE=1 SV=2		4	1	58.6208	23.3999	24.1555	19.2671	22.8933	20.9228	16.3846	24.3737	26.4551		24.6056	23.7392	32.1189	20.9756	21.9426	24.1685	1.53125	0.40656	0.535583
P63280	SUMO-conjugating enzyme UBC9 OS=Mus musculus OX=10090 GN=Ube2i PE=1 SV=1	6	3	4	1085.69	1039.05	1092.98	1014.39	998.141	1012.23	1075.5	1037.72	1054.54	1066.93	1167.59	1082.76	1072.31	1008.23	1055.81	1104.89	1.09587	0.0303875	0.0981622
Q9QYF9	Protein NDRG3 OS=Mus musculus OX=10090 GN=Ndrg3 PE=1 SV=1	6	8	9	1439.62	1488.85	1456.4	1440.96	1434.63	1408.31	1428.84	1373.02	1370.76	1368.87	1381.79	1442.81	1461.48	1427.9	1390.62	1397.46	1.05096	0.0699844	0.169012
P63089	Pleiotrophin OS=Mus musculus OX=10090 GN=Ptn PE=1 SV=1		2	1		281.428	296.054		267.444	261.223		218.548	201.407		292.588	301.324	288.648	264.315	209.803	296.924	1.41525	0.00221068	0.0185238
P51863	V-type proton ATPase subunit d 1 OS=Mus musculus OX=10090 GN=Atp6v0d1 PE=1 SV=2	7	6	9	1172.24	1228.24	1156.18	1227.19	1143.3	1176.84	1216.87	1103.97	1202.54	1150.98	1291.78	1231.73	1185.15	1181.94	1173.37	1223.46	1.0427	0.701204	0.770092
Q8CC88	von Willebrand factor A domain-containing protein 8 OS=Mus musculus OX=10090 GN=Vwa8 PE=1 SV=2	7	12	6	633.508	627.765	648.368	642.24	636.846	600.915	537.183	580.036	568.789	642.878	611.162	637.738	636.488	626.395	561.706	630.438	1.13313	0.00376828	0.0261104
Q9WV55	Vesicle-associated membrane protein-associated protein A OS=Mus musculus OX=10090 GN=Vapa PE=1 SV=2	10	9	4	1411.28	1330.99	1416.8	1306.98	1414.99	1437.42	1435.72	1383.82	1385.25	1385.89	1410.08	1300.41	1385.79	1385.27	1401.39	1364.64	1.02693	0.869766	0.898937
O08908	Phosphatidylinositol 3-kinase regulatory subunit beta OS=Mus musculus OX=10090 GN=Pik3r2 PE=1 SV=2	4	2	4	186.981	176.191	162.068	175.878	178.866	180.674	160.727	178.215	184.711	179.934	170.249	176.068	174.78	178.462	174.251	175.372	1.02417	0.94519	0.956321
Q91WS0	CDGSH iron-sulfur domain-containing protein 1 OS=Mus musculus OX=10090 GN=Cisd1 PE=1 SV=1	3	2	3	491.532	450.807	458.581	438.904	429.839	486.536	420.931	412.256	437.167	463.001	521.467	432.085	466.645	451.091	423.326	470.753	1.11203	0.244648	0.384965
P61982	14-3-3 protein gamma OS=Mus musculus OX=10090 GN=Ywhag PE=1 SV=2	20	15	18	5174.77	5092.21	5179.7	5654.05	5644.42	5861.25	5777.94	5907.8	5722.78	5244.33	5206.65	5087.36	5148.74	5719.04	5802.32	5179.01	1.12694	2.2722e-05	0.00143287
Q3U308	Cytoplasmic tRNA 2-thiolation protein 2 OS=Mus musculus OX=10090 GN=Ctu2 PE=1 SV=1	2	3	3	210.45	199.932	206.866	199.812	186.014	166.593	169.79	196.531	215.934	207.694	205.268	198.352	205.703	183.629	193.147	203.733	1.12021	0.321854	0.459403
O08759	Ubiquitin-protein ligase E3A OS=Mus musculus OX=10090 GN=Ube3a PE=1 SV=2	16	15	12	2130.62	2124.27	2135.6	2068.5	2002.75	2064.46	2037.4	2135.08	2018.12	2057.87	2032.29	2076.21	2130.16	2045.01	2062.91	2055.38	1.04164	0.0949234	0.20709
Q99JW2	Aminoacylase-1 OS=Mus musculus OX=10090 GN=Acy1 PE=1 SV=1		1	7		123.262	114.427		106.898	104.71		82.3046	112.044		131.076	112.361	118.762	105.798	96.0297	121.358	1.26376	0.339339	0.476458
P21107-2	Isoform 2 of Tropomyosin alpha-3 chain OS=Mus musculus OX=10090 GN=Tpm3	9	11	2	2057.49	2196.66	2106.15	2217.86	2054.03	2080.22	2088.44	2102.19	2073.37	2077.89	2088.81	2181.94	2119.32	2116.17	2087.97	2115.7	1.01502	0.918071	0.937419
Q9D379	Epoxide hydrolase 1 OS=Mus musculus OX=10090 GN=Ephx1 PE=1 SV=2	18	18	18	4357.14	4365.29	4522.03	4629.93	4737.37	4683.87	4627.21	4613.69	4503.71	4570.7	4468.63	4475.37	4414.17	4683.52	4581.2	4504.66	1.06102	0.00862234	0.0433667
Q8VCF0	Mitochondrial antiviral-signaling protein OS=Mus musculus OX=10090 GN=Mavs PE=1 SV=1	2	3	2	329.211	321.133	348.645	313.396	352.011	324.653	400.883	368.657	346.688	314.124	315.813	337.628	332.798	329.627	371.415	322.347	1.15222	0.0544697	0.144964
Q9JLJ2	4-trimethylaminobutyraldehyde dehydrogenase OS=Mus musculus OX=10090 GN=Aldh9a1 PE=1 SV=1	11	14	13	2951.1	2998.13	2982.15	3145.45	2998.84	3181.46	3152.79	3260.35	3130.44	2965.6	2957.62	2920.89	2977.07	3107.57	3180.69	2947.97	1.07894	0.00481247	0.0304205
Q61081	Hsp90 co-chaperone Cdc37 OS=Mus musculus OX=10090 GN=Cdc37 PE=1 SV=1	14	19	17	5422.04	5620.09	5691.9	5853.92	5653.96	5795.63	5744.84	5692.36	5525.4	5390.4	5444.79	5398.27	5576.83	5767.22	5653.42	5411.1	1.06581	0.0179189	0.0701188
A0A2C9F2A2	Ras and Rab interactor 1 OS=Mus musculus OX=10090 GN=Rin1 PE=1 SV=1	4	3	4	327.469	330.203	309.857	306.332	289.469	294.952	295.904	311.567	331.868	302.823	301.288	295.851	322.382	296.835	312.768	299.973	1.08606	0.0838031	0.190365
O54879	High mobility group protein B3 OS=Mus musculus OX=10090 GN=Hmgb3 PE=1 SV=3	3	3	4	916.101	891.812	934.863	1011.48	1036.99	920.067	922.054	977.97	881.589	909.049	851.915	1022.17	914.088	988.215	926.366	925.058	1.08109	0.462476	0.580299
P35123	Ubiquitin carboxyl-terminal hydrolase 4 OS=Mus musculus OX=10090 GN=Usp4 PE=1 SV=3	11	14	14	1558.61	1609.96	1587.57	1496.2	1465.65	1517.37	1470.49	1481.21	1493.85	1598.62	1567.09	1525.11	1585.24	1492.92	1481.82	1563.32	1.06979	0.00304392	0.0229837
P29416	Beta-hexosaminidase subunit alpha OS=Mus musculus OX=10090 GN=Hexa PE=1 SV=2	11	10	8	1513.07	1400.83	1498.13	1442.41	1455.05	1413.69	1419.75	1467.92	1441.53	1540.27	1591.7	1562.15	1469.82	1436.94	1442.93	1564.57	1.08881	0.0109844	0.0500007
Q6PDY2	2-aminoethanethiol dioxygenase OS=Mus musculus OX=10090 GN=Ado PE=1 SV=2	1	1	3	75.6081	63.8	67.1715	23.1741	62.0222	63.9192	18.4301	65.3039	64.1413	145.921	72.0071	67.9012	68.6844	45.1226	42.5796	89.356	2.09856	0.303897	0.441721
Q8C5L3	CCR4-NOT transcription complex subunit 2 OS=Mus musculus OX=10090 GN=Cnot2 PE=1 SV=2	2	1	1	231.72	203.311	219.763	236.932	281.856	233.547	212.833	229.932	262.345	232.696	199.082	198.526	217.952	249.847	234.155	209.514	1.19251	0.178608	0.310673
P17710	Hexokinase-1 OS=Mus musculus OX=10090 GN=Hk1 PE=1 SV=3	14	21	29	4092	3759.8	3970.62	4428.11	4453.7	4579.11	4573.91	4811.67	4545.75	4524.81	4593.66	4523.35	3938.4	4486.49	4642.26	4547.16	1.17872	0.000399752	0.00704261
Q91YM2	Rho GTPase-activating protein 35 OS=Mus musculus OX=10090 GN=Arhgap35 PE=1 SV=3	4	7	7	669.977	666.421	615.061	630.292	602.874	632.193	594.304	577.134	627.444	628.879	677.023	648.754	649.994	621.641	599.266	651.254	1.08675	0.0901855	0.199825
A2AQ19	RNA polymerase-associated protein RTF1 homolog OS=Mus musculus OX=10090 GN=Rtf1 PE=1 SV=1	3	2	5	443.253	442.655	436.895	443.431	467.685	489.163	486.23	486.738	509.45	481.357	457.192	418.763	440.925	466.385	494.022	451.694	1.12042	0.0669535	0.164982
Q6EDY6	F-actin-uncapping protein LRRC16A OS=Mus musculus OX=10090 GN=Carmil1 PE=1 SV=2	1	1	6	191.012	195.485	190.323	211.833	190.118	218.659	204.815	200.493	202.984	192.033	213.598	187.727	192.26	206.504	202.756	197.469	1.07409	0.397631	0.526875
P61222	ATP-binding cassette sub-family E member 1 OS=Mus musculus OX=10090 GN=Abce1 PE=1 SV=1	19	21	20	4980.75	4873.92	5086.87	5181.2	5145.24	4830.93	5062.69	4930.2	4932.47	4785.45	5060.73	5159.83	4979.75	5049.97	4974.74	4999.47	1.01512	0.925392	0.94182
P60335	Poly(rC)-binding protein 1 OS=Mus musculus OX=10090 GN=Pcbp1 PE=1 SV=1	23	24	15	5952.05	5753.79	6093.55	5962.21	5908.31	5948.86	5940.16	6121.61	5984.57	6257.92	6328.63	6085.36	5931.49	5939.75	6014.95	6223.13	1.04917	0.0526795	0.141405
Q99MN1	Lysine--tRNA ligase OS=Mus musculus OX=10090 GN=Kars PE=1 SV=1	28	22	27	6545.38	6677.25	6683.03	6596.42	6458.52	6341.37	6489.11	6449.4	6492.95	6369.86	6415.59	6483.41	6634.91	6464.6	6477.12	6422.79	1.03303	0.054584	0.145124
O54734	Dolichyl-diphosphooligosaccharide--protein glycosyltransferase 48 kDa subunit OS=Mus musculus OX=10090 GN=Ddost PE=1 SV=2	9	7	7	2200.03	1920.79	2144	2004.84	2317	2018.84	2102.88	2033.72	2046.14	2062.53	2098.77	2161.31	2084.7	2108.8	2060.7	2107.14	1.02334	0.951356	0.960378
Q8BVG4	Dipeptidyl peptidase 9 OS=Mus musculus OX=10090 GN=Dpp9 PE=1 SV=2	7	11	2	658.009	660.876	669.152	653.352	670.528	653.22	652.517	624.822	616.875	641.13	648.782	665.761	662.662	658.984	631.221	651.81	1.04981	0.0624071	0.158265
Q921T2	Torsin-1A-interacting protein 1 OS=Mus musculus OX=10090 GN=Tor1aip1 PE=1 SV=3	4	5	3	549.08	505.063	540.925	501.836	523.272	492.532	497.727	513.021	463.236	511.038	518.323	562.987	531.34	505.717	490.881	530.295	1.08242	0.176677	0.308445
Q9D2E2	Target of EGR1 protein 1 OS=Mus musculus OX=10090 GN=Toe1 PE=1 SV=1	7	6	5	689.754	668.655	624.3	727.184	747.89	745.887	740.93	727.608	726.632	637.356	651.071	698.404	660.333	740.261	731.695	661.768	1.12104	0.00642449	0.0362996
P63044	Vesicle-associated membrane protein 2 OS=Mus musculus OX=10090 GN=Vamp2 PE=1 SV=2	1	4	3	307.417	307.635	332.498	283.737	323.88	302.329	331.066	304.368	284.902	335.473	321.81	337.963	315.635	302.873	306.198	331.672	1.09509	0.274611	0.412667
O09012	Peroxisomal targeting signal 1 receptor OS=Mus musculus OX=10090 GN=Pex5 PE=1 SV=2	5	5	4	385.15	364.488	386.178	394.25	385.933	435.881	385.253	415.003	371.885	373.977	373.206	344.687	378.472	404.778	390.303	363.697	1.11295	0.149242	0.274893
Q8C052	Microtubule-associated protein 1S OS=Mus musculus OX=10090 GN=Map1s PE=1 SV=2	5	5	6	656.253	656.639	650.009	645.275	695.008	661.715	675.342	658.955	701.775	724.101	690.368	687.472	654.294	667.014	678.463	700.452	1.07055	0.0924764	0.20317
Q9DCE5	p21-activated protein kinase-interacting protein 1 OS=Mus musculus OX=10090 GN=Pak1ip1 PE=1 SV=2	2	1	1	40.2927	32.5876	37.993	35.9703	44.3428	34.6557	36.1006	48.1299	45.2578	46.103	33.4062	40.5601	36.8124	38.0932	42.8424	39.6782	1.1638	0.605409	0.695142
F7CB97	CAP-Gly domain-containing linker protein 1 (Fragment) OS=Mus musculus OX=10090 GN=Clip1 PE=1 SV=1	4	5	1	356.228	323.709	318.737	359.313	366.542	364.827	365.152	350.917	384.486	312.605	352.13	325.247	332.485	363.548	366.595	329.587	1.11229	0.0501967	0.137578
Q9Z2G6	Protein sel-1 homolog 1 OS=Mus musculus OX=10090 GN=Sel1l PE=1 SV=2	2	1	3	228.493	238.434	256.408	212.359	249.965	216.666	220.796	242.721	191.408	255.488	186.016	252.655	240.838	225.726	217.28	228.99	1.10842	0.773625	0.826187
Q9ESZ8	General transcription factor II-I OS=Mus musculus OX=10090 GN=Gtf2i PE=1 SV=3	6	2	4	825.759	717.216	848.771	836.997	960.235	820.38	756.24	796.098	749.541	895.076	840.524	895.379	795.118	870.373	767.021	876.609	1.14287	0.0979755	0.210665
P29595	NEDD8 OS=Mus musculus OX=10090 GN=Nedd8 PE=1 SV=2	2	3	3	622.198	602.118	598.618	662.024	703.261	668.977	610.549	646.625	669.039	609.154	551.922	567.292	607.557	677.851	641.616	575.622	1.1776	0.00504373	0.0313622
Q9WUN2	Serine/threonine-protein kinase TBK1 OS=Mus musculus OX=10090 GN=Tbk1 PE=1 SV=1	3	5	3	243.018	246.401	244.273	249.355	246.973	261.435	220.581	230.14	218.915	259.22	248.659	247.551	244.56	252.509	223.158	251.756	1.13153	0.000776127	0.00995994
Q8BGM4	Methyltransferase-like 27 OS=Mus musculus OX=10090 GN=Mettl27 PE=1 SV=1	1		1	102.71		96.9164	107.321		93.0999	97.4629		128.875	107.111		95.7123	99.771	99.9577	112.074	101.251	1.12331	0.739705	0.79981
P62911	60S ribosomal protein L32 OS=Mus musculus OX=10090 GN=Rpl32 PE=1 SV=2	5	4	7	1212.81	1112.2	1162.05	1101.48	1370.34	1159.88	1300.26	1260.37	1291.4	1333.45	1205.1	1334.67	1161.63	1205.24	1283.9	1289.61	1.11017	0.251837	0.391123
P56812	Programmed cell death protein 5 OS=Mus musculus OX=10090 GN=Pdcd5 PE=1 SV=3	6	9	8	1625.81	1689.35	1612.16	1779.88	1651.27	1681.93	1748.11	1592.31	1672.13	1423.97	1644.85	1611.55	1642.1	1703.49	1669.64	1557	1.09408	0.241609	0.381612
Q6P5C5	Single-strand selective monofunctional uracil DNA glycosylase OS=Mus musculus OX=10090 GN=Smug1 PE=1 SV=1		1	2		14.7241	19.993		4.85297	21.3071		15.6992	17.3059		41.1686	17.8388	17.1574	10.1687	16.483	27.0998	2.66502	0.530887	0.63614
Q8BTS4	Nuclear pore complex protein Nup54 OS=Mus musculus OX=10090 GN=Nup54 PE=1 SV=1	3	4	5	528.248	527.635	489.787	543.081	533.16	543.799	527.67	479.465	538.323	492.253	550.992	519.342	514.904	539.991	514.503	520.31	1.04954	0.583238	0.678401
Q9D0I9	Arginine--tRNA ligase, cytoplasmic OS=Mus musculus OX=10090 GN=Rars PE=1 SV=2	32	34	44	9946.47	10199.8	9918.56	9681.66	9526.49	9467.33	9499.41	9192.9	9445.65	9433.45	9641.8	9729.44	10020.8	9558.07	9378.36	9600.76	1.0685	0.00428089	0.0283216
P24527	Leukotriene A-4 hydrolase OS=Mus musculus OX=10090 GN=Lta4h PE=1 SV=4	25	22	31	6198.78	6348.41	6339.46	6232.7	6144.23	6211.77	6302.87	6406.64	6175.66	6281.87	6116.95	6289.34	6295.17	6196.12	6294.35	6228.88	1.01599	0.477157	0.593153
Q9CX30	Protein YIF1B OS=Mus musculus OX=10090 GN=Yif1b PE=1 SV=2	2	2	1	209.516	189.121	190.443	172.719	179.785	191.387	215.377	199.588	195.752	179.778	208.897	199.808	196.144	181.135	203.398	195.777	1.12291	0.195688	0.329357
P97742	Carnitine O-palmitoyltransferase 1, liver isoform OS=Mus musculus OX=10090 GN=Cpt1a PE=1 SV=4	11	12	8	1069.34	1069.36	1049.64	1195.32	1131.75	1233.49	1076.41	1149.68	1120.08	1089.15	1079.44	1027.02	1062.74	1186.1	1114.98	1064.85	1.11608	0.00937683	0.0454197
Q6ZQ08	CCR4-NOT transcription complex subunit 1 OS=Mus musculus OX=10090 GN=Cnot1 PE=1 SV=2	21	20	27	3349.3	3200.64	3239.76	3296.3	3399.4	3288.4	3340.34	3492.64	3563.31	3524.14	3417.4	3418.61	3262.63	3327.65	3464.17	3453.03	1.06177	0.0409908	0.119525
P32921	Tryptophan--tRNA ligase, cytoplasmic OS=Mus musculus OX=10090 GN=Wars PE=1 SV=2	21	20	19	2778.07	2750.36	2903.26	2797.65	2872.68	2791.12	2786.61	2832.61	2846	2861.38	2768.05	2683.32	2809.78	2820.24	2821.62	2769.96	1.01865	0.755483	0.813195
P63242	Eukaryotic translation initiation factor 5A-1 OS=Mus musculus OX=10090 GN=Eif5a PE=1 SV=2	15	15	14	4235.98	4253.42	4474.18	4451.19	4392.69	4295.77	4562.69	4479.49	4346.36	4324.1	4448.36	4457.64	4319.85	4379.41	4461.95	4409.61	1.0329	0.431674	0.555942
Q8VI75	Importin-4 OS=Mus musculus OX=10090 GN=Ipo4 PE=1 SV=1	5	9	6	741.595	723.344	705.854	658.414	655.57	642.438	598.593	610.105	610.82	682.926	692.509	722.416	723.45	652.103	606.48	699.083	1.19287	3.19337e-05	0.00164371
A0A0J9YUQ8	Gelsolin (Fragment) OS=Mus musculus OX=10090 GN=Gsn PE=1 SV=1	1	3	2	552.981	555.461	590.634	524.409	558.819	531.87	520.879	491.059	501.885	569.586	562.515	543.465	566.101	538.165	504.458	558.413	1.1222	0.00834175	0.0426093
Q9CQ71	Replication protein A 14 kDa subunit OS=Mus musculus OX=10090 GN=Rpa3 PE=1 SV=1	8	9	8	922.986	948.596	999.663	1018.9	1049.39	1000.79	1075.16	1042.49	1031.07	984.968	961.54	970.487	956.555	1022.83	1049.41	972.284	1.09707	0.00893219	0.0442887
Q8CJ19	[F-actin]-monooxygenase MICAL3 OS=Mus musculus OX=10090 GN=Mical3 PE=1 SV=2	1	2	1	53.926	39.7445	48.1184	48.0575	50.3106	50.997	50.2004	49.1138	45.9137	37.6438	50.6588	44.7987	46.8953	49.7724	48.3747	44.0424	1.1301	0.593265	0.686475
Q91XL9	Oxysterol-binding protein-related protein 1 OS=Mus musculus OX=10090 GN=Osbpl1a PE=1 SV=2	5	6	4	832.367	897.603	861.893	966.981	938.363	856.258	902.828	914.771	917.118	854.496	805.935	921.404	863.544	919.315	911.551	859.317	1.06982	0.287976	0.425267
Q6PDI5	Proteasome-associated protein ECM29 homolog OS=Mus musculus OX=10090 GN=Ecm29 PE=1 SV=3	36	40	39	5392.47	5568.98	5585.82	5361.63	5391.66	5182.74	5120.33	5045.2	5078.07	5312.19	5180.77	5339.98	5515.06	5311.2	5081.11	5277.19	1.0854	0.00269689	0.0212664
Q80V26	Inositol monophosphatase 3 OS=Mus musculus OX=10090 GN=Impad1 PE=1 SV=1	8	5	3	387.489	387.558	393.947	387.951	370.125	389.094	381.075	408.359	384.666	416.768	407.24	405.575	389.653	382.29	391.182	409.831	1.07204	0.0467378	0.130855
Q8K009	Mitochondrial 10-formyltetrahydrofolate dehydrogenase OS=Mus musculus OX=10090 GN=Aldh1l2 PE=1 SV=2	43	37	44	9721.94	10094.9	9651.31	9084.31	9015.19	9308.11	9036.33	8584.73	8638.97	9032.75	9180.48	9276.93	9820.82	9135.02	8751.05	9162.84	1.12224	0.00120159	0.0132657
Q920L1	Fatty acid desaturase 1 OS=Mus musculus OX=10090 GN=Fads1 PE=1 SV=1	2	2	4	280.167	266.796	259.918	228.665	230.801	248.059	261.47	229.961	226.312	223.092	265.836	259.105	268.83	235.684	238.741	248.614	1.14063	0.15863	0.28655
B1AVY7	Kinesin-like protein KIF16B OS=Mus musculus OX=10090 GN=Kif16b PE=1 SV=1	1	2	3	168.025	144.233	146.384	113.131	144.617	141.779	122.862	140.106	138.516	166.267	141.328	143.605	152.514	132.374	133.595	149.992	1.15214	0.240416	0.380442
Q9D8T7	SRA stem-loop-interacting RNA-binding protein, mitochondrial OS=Mus musculus OX=10090 GN=Slirp PE=1 SV=2	2	1	1	155.143	150.776	130.282	127.594	138.849	118.383	132.013	137.254	130.51	146.161	134.032	181.736	144.983	128.003	133.228	152.696	1.19291	0.208896	0.344653
P35282	Ras-related protein Rab-21 OS=Mus musculus OX=10090 GN=Rab21 PE=1 SV=4	6	2	4	876.167	855.12	882.45	881.791	887.758	891.035	861.183	843.375	874.65	877.988	910.875	848.994	871.167	886.853	859.641	878.923	1.03166	0.392746	0.522917
Q66T02	Pleckstrin homology domain-containing family G member 5 OS=Mus musculus OX=10090 GN=Plekhg5 PE=1 SV=1	8	10	11	1227.5	1256.06	1244.89	1377.55	1286.71	1442.8	1290.48	1365.02	1360.78	1282.13	1269.88	1129.2	1242.76	1367.51	1338.32	1225.06	1.11629	0.0606727	0.155458
Q8K2J0	1-phosphatidylinositol 4,5-bisphosphate phosphodiesterase delta-3 OS=Mus musculus OX=10090 GN=Plcd3 PE=1 SV=2	4	3	4	140.905	123.007	139.574	139.548	143.657	124.236	122.729	127.179	130.504	134.712	144.05	143.579	134.241	135.55	126.764	140.714	1.11005	0.265373	0.403574
P53395	Lipoamide acyltransferase component of branched-chain alpha-keto acid dehydrogenase complex, mitochondrial OS=Mus musculus OX=10090 GN=Dbt PE=1 SV=2	1	1	1	77.5902	92.3866	90.3973	97.2214	82.8084	86.4043	90.2632	83.4089	81.7528	80.2816	86.7526	86.8021	86.5347	88.6048	85.0633	84.5557	1.04789	0.855899	0.889361
Q99KR7	Peptidyl-prolyl cis-trans isomerase F, mitochondrial OS=Mus musculus OX=10090 GN=Ppif PE=1 SV=1	1	1	2	326.099	348.573	322.155	362.101	338.497	378.332	361.461	381.033	381.303	337.941	319.499	305.811	332.075	359.269	374.483	320.815	1.16729	0.0116772	0.0523405
Q9DAI2	Intraflagellar transport protein 22 homolog OS=Mus musculus OX=10090 GN=Ift22 PE=1 SV=1	2	2	3	84.9221	81.6067	76.8549	61.7502	80.5455	84.47	83.0902	78.5444	83.5897	83.9522	73.0181	68.8001	81.0599	74.8963	81.7095	74.9924	1.09097	0.61014	0.699069
Q8BSY0	Aspartyl/asparaginyl beta-hydroxylase OS=Mus musculus OX=10090 GN=Asph PE=1 SV=1	19	20	22	3158.71	2877.6	2994.92	3277.36	3386.07	3332.22	3475.55	3422.78	3483.93	3019.57	3244.73	3120.12	3008.21	3331.59	3460.65	3126.78	1.1504	0.00228649	0.0189774
Q91VJ4	Serine/threonine-protein kinase 38 OS=Mus musculus OX=10090 GN=Stk38 PE=1 SV=1	4	5	8	1326.86	1302.74	1274.89	1372.45	1303.03	1287.97	1157.25	1246.81	1200.18	1129.87	1133.85	1223.4	1301.32	1320.64	1200.86	1161.58	1.13693	0.00545161	0.0326558
Q8R2U6	Diphosphoinositol polyphosphate phosphohydrolase 2 OS=Mus musculus OX=10090 GN=Nudt4 PE=1 SV=1	1	3	2	206.275	272.716	248.322	256.04	240.462	259.006	245.95	236.151	265.776	306.09	265.026	241.251	240.837	251.703	248.992	269.485	1.11895	0.592894	0.686386
Q9CPS7	RNA-binding protein PNO1 OS=Mus musculus OX=10090 GN=Pno1 PE=1 SV=1		2	2		84.8766	88.8604		92.486	72.6203		103.676	127.901		80.0822	71.7393	86.8457	81.9534	115.153	75.796	1.51925	0.0887433	0.197431
Q8CI61	BAG family molecular chaperone regulator 4 OS=Mus musculus OX=10090 GN=Bag4 PE=1 SV=2	1	1	2	120.245	130.022	115.79	131.059	114.756	121.934	87.7877	114.275	126.575	142.655	122.695	117.448	121.876	122.402	108.287	127.151	1.1742	0.41269	0.541429
Q80TM9	Nischarin OS=Mus musculus OX=10090 GN=Nisch PE=1 SV=2	6	7	7	767.678	815.986	753.863	832.664	772.163	840.915	755.65	747.22	787.841	695.174	715.796	668.547	778.726	814.661	763.371	692.902	1.17572	0.00507024	0.03141
Q7TQI3	Ubiquitin thioesterase OTUB1 OS=Mus musculus OX=10090 GN=Otub1 PE=1 SV=2	16	12	10	1998.32	2186.03	2105.61	2012.05	1871.17	2037.66	2041.54	2180.95	1972.57	2086.12	1899.88	2022.19	2095.24	1972.25	2063.21	2001.22	1.06236	0.434248	0.557571
Q8BND3	WD repeat-containing protein 35 OS=Mus musculus OX=10090 GN=Wdr35 PE=1 SV=3		1			145.896			149.939			167.695			133.122		145.896	149.939	167.695	133.122	1.25971
Q05769	Prostaglandin G/H synthase 2 OS=Mus musculus OX=10090 GN=Ptgs2 PE=1 SV=1	1	4	3	338.311	333.908	329.413	295.013	338.744	389.45	324.322	367.262	330.239	377.744	295.477	286.288	333.858	338.887	340.09	317.328	1.07173	0.851525	0.886146
Q99LB4	Capping protein (Actin filament), gelsolin-like OS=Mus musculus OX=10090 GN=Capg PE=1 SV=1	13	14	13	4172.86	4253.35	4466.07	4304.11	4195.28	4249.3	4178.85	4237.3	4164.36	4654.54	4624.42	4430.63	4295.66	4249.33	4193.38	4568.77	1.08952	0.00897651	0.0444461
Q9CZ13	Cytochrome b-c1 complex subunit 1, mitochondrial OS=Mus musculus OX=10090 GN=Uqcrc1 PE=1 SV=2	10	8	5	557.721	556.748	568.658	517.042	543.771	498.175	496.891	472.578	542.808	528.912	527.469	490.925	561.016	519.327	503.262	515.464	1.11476	0.0935686	0.205076
Q3TC93	HCLS1-binding protein 3 OS=Mus musculus OX=10090 GN=Hs1bp3 PE=1 SV=2	5	9	8	548.365	548.156	562.399	573.873	518.416	540.062	564.047	622.727	558.963	546.922	543.908	571.783	552.933	543.642	581.208	554.065	1.0691	0.317455	0.455351
Q6PFD9	Nuclear pore complex protein Nup98-Nup96 OS=Mus musculus OX=10090 GN=Nup98 PE=1 SV=2	4	4	1	250.091	243.333	213.285	236.331	243.443	267.644	244.625	238.205	258.341	221.979	228.045	213.755	235.01	248.786	246.916	221.182	1.1248	0.134978	0.256663
P47791	Glutathione reductase, mitochondrial OS=Mus musculus OX=10090 GN=Gsr PE=1 SV=3	4	5	7	1506.29	1437.8	1529.05	1535.07	1570.37	1487.21	1454.17	1624.6	1527.15	1603.19	1465.96	1555.31	1490.54	1530.5	1533.73	1540.43	1.03347	0.767228	0.821228
Q61214	Dual specificity tyrosine-phosphorylation-regulated kinase 1A OS=Mus musculus OX=10090 GN=Dyrk1a PE=1 SV=1	2	4	4	391.044	375.998	398.124	406.813	397.916	371.969	365.938	391.62	369.268	357.669	355.929	382.102	388.279	391.95	375.438	365.041	1.07372	0.173795	0.305491
Q9Z1F9	SUMO-activating enzyme subunit 2 OS=Mus musculus OX=10090 GN=Uba2 PE=1 SV=1	19	25	24	4722.85	4840.15	4879.42	5226.24	4987.32	5070.87	5035.97	5262.87	5042.48	4750.82	4645.54	4743.11	4813.68	5093.85	5112.69	4712.91	1.08483	0.00235688	0.0193678
P05132	cAMP-dependent protein kinase catalytic subunit alpha OS=Mus musculus OX=10090 GN=Prkaca PE=1 SV=3	14	19	14	2210.04	2441.68	2243.3	2258.56	2177.34	2308.91	2296.81	2110.95	2239.14	2245.77	2281.2	2219.82	2296.11	2247.61	2214.26	2248.79	1.03696	0.719076	0.784751
Q80V62	Fanconi anemia group D2 protein homolog OS=Mus musculus OX=10090 GN=Fancd2 PE=1 SV=2	1	1		140.161	126.001		112.962	109.039		111.298	123.642		131.628	137.367		132.892	110.983	117.308	134.467	1.2116	0.0650063	0.161872
Q9QUJ7	Long-chain-fatty-acid--CoA ligase 4 OS=Mus musculus OX=10090 GN=Acsl4 PE=1 SV=2	8	10	14	1287.79	1244.75	1256.75	1183.73	1192.11	1199.96	1141.44	1130.31	1167.56	1256.04	1301.84	1244.73	1262.97	1191.92	1146.33	1267.3	1.10552	0.000252294	0.00558559
P68433	Histone H3.1 OS=Mus musculus OX=10090 GN=Hist1h3a PE=1 SV=2	1	1	3	636.107	652.66	582.52	455.86	493.846	521.633	530.976	513.576	417.047	491.496	454.357	593.238	623.03	489.699	484.494	509.779	1.28594	0.0594438	0.153577
P83887	Tubulin gamma-1 chain OS=Mus musculus OX=10090 GN=Tubg1 PE=1 SV=1	6	6	7	372.191	335.786	340.859	329.201	344.077	336.867	344.716	342.248	369.982	343.208	367.205	341.607	349.248	336.66	352.096	350.481	1.04585	0.568665	0.667112
Q8R349	Cell division cycle protein 16 homolog OS=Mus musculus OX=10090 GN=Cdc16 PE=1 SV=1	6	5	7	1016.17	1080.04	1029.74	999.729	993.208	985.504	1017.6	920.015	1011.1	993.893	1034.13	1001.04	1041.63	992.797	981.873	1009.54	1.06086	0.246292	0.386346
Q9CR09	Ubiquitin-fold modifier-conjugating enzyme 1 OS=Mus musculus OX=10090 GN=Ufc1 PE=1 SV=1	1	1	2	611.333	652.596	639.846	624.554	602.064	588.155	512.077	549.892	550.352	666.566	609.978	636.176	634.355	604.739	537.136	637.155	1.18621	0.00179429	0.0166102
Q6P8M1	Putative deoxyribonuclease TATDN1 OS=Mus musculus OX=10090 GN=Tatdn1 PE=1 SV=1	5	2	5	366.687	365.91	360.303	344.814	366.852	387.247	368.717	382.099	371.48	391.165	356.523	352.354	364.289	365.894	374.054	366.276	1.02681	0.868498	0.898221
Q9CX86	Heterogeneous nuclear ribonucleoprotein A0 OS=Mus musculus OX=10090 GN=Hnrnpa0 PE=1 SV=1	3	4	1	287.242	244.324	306.488	289.913	337.321	293.044	316.549	310.981	302.737	318.186	319.264	309.621	278.105	306.019	310.037	315.661	1.13504	0.22791	0.366029
P62077	Mitochondrial import inner membrane translocase subunit Tim8 B OS=Mus musculus OX=10090 GN=Timm8b PE=1 SV=1	1	1	1	152.876	148.804	150.665	149.822	148.063	151.265	143.887	144.175	143.622	137.734	143.277	138.767	150.773	149.711	143.895	139.905	1.07768	0.000452136	0.00756359
Q91Z38	Tetratricopeptide repeat protein 1 OS=Mus musculus OX=10090 GN=Ttc1 PE=1 SV=1	3	4	4	688.048	715.642	713.903	689.001	693.645	711.182	770.344	779.618	769.622	756.34	714.826	709.025	705.751	697.878	773.181	726.429	1.1079	0.00228912	0.0189774
Q3U0K8	Prolyl 3-hydroxylase OGFOD1 OS=Mus musculus OX=10090 GN=Ogfod1 PE=1 SV=1	1	2	6	152.832	192.396	201.878	167.448	199.552	183.789	200.683	212.784	183.771	252.776	169.007	204.301	181.064	183.127	198.72	205.891	1.13711	0.621878	0.706666
B2RY04	Dedicator of cytokinesis protein 5 OS=Mus musculus OX=10090 GN=Dock5 PE=1 SV=2	15	19	15	2341.58	2237.08	2269.98	2456.27	2405	2415.33	2291.53	2413.89	2359.77	2261.26	2294.66	2305.56	2282.47	2425.43	2354.53	2287.08	1.06264	0.0137325	0.0583843
A0A1L1SQ51	Talin-2 OS=Mus musculus OX=10090 GN=Tln2 PE=1 SV=1	13	16	21	2034.06	1932.79	2013.24	1998.62	2067.86	2121.35	2150.12	2225.84	2134.17	2109.67	2065.99	2023.72	1992.88	2062	2169.68	2066.16	1.08872	0.0215766	0.0787408
Q80U95	Ubiquitin-protein ligase E3C OS=Mus musculus OX=10090 GN=Ube3c PE=1 SV=2	9	11	9	857.432	799.157	838.038	855.256	821.354	778.992	757.797	800.955	789.323	806.92	855.94	871.052	831.186	817.937	782.478	844.188	1.07887	0.168631	0.299318
E9PX68	Solute carrier family 4 (anion exchanger), member 1, adaptor protein OS=Mus musculus OX=10090 GN=Slc4a1ap PE=1 SV=1	3	1	5	119.029	49.4879	115.917	105.728	145.46	115.8	110.752	128.822	118.603	126.434	138.174	111.624	88.0576	121.213	119.164	124.935	1.41878	0.40791	0.536851
Q9DCM0	Persulfide dioxygenase ETHE1, mitochondrial OS=Mus musculus OX=10090 GN=Ethe1 PE=1 SV=2	9	3	3	804.536	860.721	836.255	916.961	836.279	855.889	905.455	867.282	869.864	800.318	862.988	865.264	833.519	869.04	880.696	842.31	1.0566	0.32796	0.4648
F8VPN4	Amylo-1,6-glucosidase, 4-alpha-glucanotransferase OS=Mus musculus OX=10090 GN=Agl PE=1 SV=1	8	6	7	658.175	681.329	719.888	615.439	627.105	607.066	592.593	625.395	533.808	700.527	632.904	705.97	685.995	616.482	582.682	678.969	1.17731	0.0198262	0.0747479
P21550	Beta-enolase OS=Mus musculus OX=10090 GN=Eno3 PE=1 SV=3	16	17	17	3026.79	3294.61	3169.88	3434.24	3177.36	3371.56	3540.02	3521.26	3357.3	3011.54	3019.36	3113.85	3161.86	3325.9	3471.88	3047.9	1.13911	0.00743717	0.0398122
Q8R5L3	Vam6/Vps39-like protein OS=Mus musculus OX=10090 GN=Vps39 PE=1 SV=1	5	1	2	185.234	175.944	127.639	162.883	187.504	187.787	156.68	157.373	195.787	179.099	163.074	172.683	160.827	178.999	169.009	171.491	1.11299	0.787069	0.83768
O55057	Retinal rod rhodopsin-sensitive cGMP 3',5'-cyclic phosphodiesterase subunit delta OS=Mus musculus OX=10090 GN=Pde6d PE=1 SV=1	2	3	2	483.616	505.148	485.38	455.151	430.159	465.295	488.229	476.75	437.291	451.155	466.096	490.186	491.285	449.957	466.905	468.872	1.09185	0.175453	0.307567
P50396	Rab GDP dissociation inhibitor alpha OS=Mus musculus OX=10090 GN=Gdi1 PE=1 SV=3	24	25	22	5640.15	6039.82	6019.3	6432.36	6044.71	6466.62	6767.94	6648.69	6414.97	6043.75	6150.99	5983.31	5896.85	6311.62	6608.9	6058.96	1.12075	0.00946009	0.0456815
Q9QWY8	Arf-GAP with SH3 domain, ANK repeat and PH domain-containing protein 1 OS=Mus musculus OX=10090 GN=Asap1 PE=1 SV=2	7	7	8	956.986	980.95	980.991	1037.53	983.777	1054.09	1042.02	1030.7	995.966	901.176	942.279	906.66	972.909	1024.69	1022.7	916.526	1.11801	0.00217141	0.0183762
P55065	Phospholipid transfer protein OS=Mus musculus OX=10090 GN=Pltp PE=1 SV=1	2	2	2	282.673	229.767	247.464	223.905	251.958	264.003	252.527	245.498	242.995	271.106	302.989	275.751	252.364	246.037	246.974	282.94	1.14999	0.148491	0.273972
Q9CPR5	39S ribosomal protein L15, mitochondrial OS=Mus musculus OX=10090 GN=Mrpl15 PE=1 SV=1	4	1	2	207.875	189.424	185.391	171.193	179.634	177.798	177.997	157.148	149.468	168.144	199.003	212.551	193.988	176.17	161.098	192.31	1.20417	0.0756285	0.177122
Q61578	NADPH:adrenodoxin oxidoreductase, mitochondrial OS=Mus musculus OX=10090 GN=Fdxr PE=1 SV=1	6	8	7	575.056	600.563	617.399	600.934	597.358	611.941	697.611	681.306	644.477	602.761	597.134	602.544	597.418	603.379	674.095	600.808	1.12835	0.00197186	0.0175923
E9Q9C3	Afadin OS=Mus musculus OX=10090 GN=Afdn PE=1 SV=1		25			3417.08			3487.49			3839.25			3438.49		3417.08	3487.49	3839.25	3438.49	1.12355
Q5SVD0	Refilin-B OS=Mus musculus OX=10090 GN=Rflnb PE=1 SV=1	1	2	1	58.9859	66.568	65.3439	57.7746	70.4033	94.7142	82.7231	72.9893	70.9541	84.8217	74.3446	53.293	63.5438	72.7638	75.3855	69.5252	1.18636	0.690461	0.761327
Q9CT10	Ran-binding protein 3 OS=Mus musculus OX=10090 GN=Ranbp3 PE=1 SV=2	13	12	9	2165.25	2273.16	2310.49	2361.75	2354.61	2301.49	2449.1	2362.45	2400.07	2350.13	2336.02	2314.18	2248.79	2339.13	2403.61	2333.4	1.06885	0.0277785	0.0932719
Q6NWW9	Fibronectin type III domain-containing protein 3B OS=Mus musculus OX=10090 GN=Fndc3b PE=1 SV=1	4	3	2	453.488	416.401	403.755	391.998	438.332	397.992	374.935	364.701	458.777	422.747	423.734	382.645	424.032	408.934	397.343	409.251	1.06717	0.809444	0.854119
Q501J2	Protein FAM173A OS=Mus musculus OX=10090 GN=Fam173a PE=1 SV=1	1	2	1	15.0717	35.804	33.542	38.9189	33.5327	29.2253	45.63	29.6759	28.9373	32.5602	33.1683	40.4762	26.256	33.6612	33.9654	35.2265	1.34166	0.603776	0.693838
Q9CW03	Structural maintenance of chromosomes protein 3 OS=Mus musculus OX=10090 GN=Smc3 PE=1 SV=2	10	11	17	2343.88	1949.34	2012.2	2210.12	2303.92	2209.7	1966.25	2146.65	2461.98	2089.31	2209.64	1925.67	2094.9	2240.81	2182.2	2071.58	1.08169	0.650508	0.730132
P10404	MLV-related proviral Env polyprotein OS=Mus musculus OX=10090 PE=1 SV=3	3	7	7	849.949	763.416	759.619	673.407	764.151	703.755	631.289	667.37	688.085	725.182	684.891	728.37	789.92	712.786	661.829	712.536	1.19354	0.0224417	0.0811089
P49817	Caveolin-1 OS=Mus musculus OX=10090 GN=Cav1 PE=1 SV=1	5	4	3	766.91	823.26	852.93	794.036	798.342	705.182	844.408	728.919	777.247	768.101	822.934	838.096	813.576	764.616	782.102	809.144	1.06403	0.594252	0.686769
P62311	U6 snRNA-associated Sm-like protein LSm3 OS=Mus musculus OX=10090 GN=Lsm3 PE=1 SV=2	1	1	1	563.595	588.528	548.577	525.032	530.296	558.889	538.107	560.098	557.687	637.038	584.85	598.619	566.662	537.869	551.876	606.439	1.12748	0.0146105	0.0609944
Q9JKP7	DNA polymerase epsilon subunit 3 OS=Mus musculus OX=10090 GN=Pole3 PE=1 SV=1	2	4	3	968.151	950.757	908.002	990.959	986.606	1019.64	941.91	969.428	1024.04	920.501	914.729	869.838	941.961	998.962	977.868	901.402	1.10823	0.0204985	0.0762629
Q9CRD0	OCIA domain-containing protein 1 OS=Mus musculus OX=10090 GN=Ociad1 PE=1 SV=1	1	2	2	104.797	100.5	101.74	100.153	102.453	92.3406	83.9743	93.6037	99.6214	93.0786	85.447	88.3012	102.33	98.2184	92.1716	88.8869	1.15123	0.0603877	0.155075
P70671	Interferon regulatory factor 3 OS=Mus musculus OX=10090 GN=Irf3 PE=1 SV=1	3	2	4	94.3349	86.0122	91.9777	95.6204	103.713	86.9414	90.9217	96.6781	90.4717	86.2773	80.7509	97.7635	90.7065	95.1781	92.648	87.9846	1.08176	0.612796	0.700253
Q6P1G0	HEAT repeat-containing protein 6 OS=Mus musculus OX=10090 GN=Heatr6 PE=1 SV=1	6	6	4	628.946	601.635	605.899	601.917	610.438	575.353	575.491	596.097	562.04	590.974	589.16	654.037	612.043	595.714	577.707	610.662	1.05944	0.295027	0.432267
Q6ZPU9	KIF1-binding protein OS=Mus musculus OX=10090 GN=Kif1bp PE=1 SV=2	2	5	3	233.279	226.143	203.301	209.27	215.189	204.836	212.301	203.138	226.364	213.439	223.82	233.788	220.529	209.722	213.723	223.528	1.06583	0.468348	0.585564
Q8K2B3	Succinate dehydrogenase [ubiquinone] flavoprotein subunit, mitochondrial OS=Mus musculus OX=10090 GN=Sdha PE=1 SV=1	12	15	18	2311.77	2296.5	2416.24	2098.84	2162.61	2035.91	2182.72	2091.4	2020.4	2239.75	2282.56	2360.53	2340.9	2098.48	2097.13	2293.74	1.11624	0.00389065	0.026682
Q8BGZ4	Cell division cycle protein 23 homolog OS=Mus musculus OX=10090 GN=Cdc23 PE=1 SV=2	6	8	6	688.333	686.289	709.285	667.8	599.36	640.369	665.914	623.145	644.3	663.137	776.392	691.231	694.559	635.216	644.217	708.657	1.11561	0.0845254	0.191542
P34022	Ran-specific GTPase-activating protein OS=Mus musculus OX=10090 GN=Ranbp1 PE=1 SV=2	11	10	12	7676.88	8175.06	8075.65	8497.77	7839.63	8050.62	8421.84	8263.81	7975.58	7568.98	7886.96	8063.6	7972.93	8124.75	8218.33	7837.16	1.04864	0.388598	0.518869
Q9Z2Q5	39S ribosomal protein L40, mitochondrial OS=Mus musculus OX=10090 GN=Mrpl40 PE=1 SV=2	2	1	1	53.513	51.6459	37.6064	45.7933	43.6439	55.8673	46.1895	47.701	45.7415	48.8127	51.3176	55.0933	47.0168	48.1535	46.5365	51.6772	1.11047	0.722247	0.787294
Q9CYR6	Phosphoacetylglucosamine mutase OS=Mus musculus OX=10090 GN=Pgm3 PE=1 SV=1	9	12	11	1537.13	1543.87	1514.23	1565	1521.87	1559.74	1537.15	1552.4	1546.39	1468.28	1489.43	1487.2	1531.69	1548.75	1545.3	1481.61	1.04532	0.00252488	0.0201818
Q9CY50	Translocon-associated protein subunit alpha OS=Mus musculus OX=10090 GN=Ssr1 PE=1 SV=1	4	5	6	1103.81	1027.36	1057.92	1078.92	1102.05	1048.96	1034.57	997.677	1025.56	1107.66	1197.87	1192.52	1062.57	1076.42	1019.15	1165.27	1.14338	0.00617697	0.0354734
Q64433	10 kDa heat shock protein, mitochondrial OS=Mus musculus OX=10090 GN=Hspe1 PE=1 SV=2	9	13	12	6754.7	6961.11	6898.14	6271.02	6241.52	6486.56	6520.68	6554.32	6429.22	6889.15	6678.61	6621.64	6870.77	6332.1	6501.19	6728.82	1.08507	0.0019367	0.0173488
Q8BXC6	COMM domain-containing protein 2 OS=Mus musculus OX=10090 GN=Commd2 PE=1 SV=1	3	2	4	203.843	184.936	182.873	168.971	188.776	187.139	164.749	176.156	168.413	195.253	182.949	194.392	190.322	181.402	169.706	190.781	1.12418	0.0628252	0.158981
Q62159	Rho-related GTP-binding protein RhoC OS=Mus musculus OX=10090 GN=Rhoc PE=1 SV=2	1		2	64.5213		63.8379	67.1277		54.5464	68.3817		60.4956	49.4054		70.556	64.1787	60.5109	64.3179	59.0411	1.08938	0.918806	0.937419
Q8VE09	Tetratricopeptide repeat protein 39C OS=Mus musculus OX=10090 GN=Ttc39c PE=1 SV=2	2	1	3	134.346	134.924	133.456	117.182	127.76	133.704	133.5	130.446	128.831	138.901	130.798	127.938	134.241	126.028	130.912	132.465	1.06516	0.330651	0.467765
Q8R2G6	Coiled-coil domain-containing protein 80 OS=Mus musculus OX=10090 GN=Ccdc80 PE=1 SV=2	1		1	85.1023		66.3632	70.6931		69.4378	60.5098		50.4787	63.4202		93.4457	75.1509	70.0626	55.2672	76.9828	1.39292	0.344512	0.481125
Q80U72	Protein scribble homolog OS=Mus musculus OX=10090 GN=Scrib PE=1 SV=2	13	10	12	1237.21	1193.9	1170.46	1179.96	1179.76	1208.33	1181.31	1241.07	1263.51	1243.86	1227.62	1200.05	1200.21	1189.27	1228.14	1223.71	1.03268	0.393165	0.523178
Q925J9	Mediator of RNA polymerase II transcription subunit 1 OS=Mus musculus OX=10090 GN=Med1 PE=1 SV=2	2	3	1	145.917	122.631	130.734	143.226	132.774	115.643	124.584	130.575	119.34	112.364	140.111	160.373	132.749	130.042	124.749	136.168	1.09154	0.820416	0.860806
Q9DAV6	R86 OS=Mus musculus OX=10090 GN=Serpinb9b PE=1 SV=1	4	4	7	504.986	520.03	513.745	481.994	511.823	495.731	502.254	499.598	512.052	529.318	487.101	497.023	512.883	496.366	504.607	504.163	1.03327	0.590112	0.684179
Q8BTX9	Inactive hydroxysteroid dehydrogenase-like protein 1 OS=Mus musculus OX=10090 GN=Hsdl1 PE=1 SV=1	3	3	3	205.026	210.485	233.503	245.456	237.087	237.271	237.372	252.939	221.399	207.59	194.934	203.271	215.994	239.906	236.886	201.863	1.18846	0.0102374	0.0479612
O35551	Rab GTPase-binding effector protein 1 OS=Mus musculus OX=10090 GN=Rabep1 PE=1 SV=2	16	17	18	3122.59	3257.7	3147.93	3499.29	3303.33	3477.29	3562.06	3517.43	3449.26	3102.2	3207.67	3211.66	3175.54	3425.5	3509.28	3173.43	1.10583	0.00120366	0.0132657
Q91VU7-2	Isoform 2 of Pseudouridylate synthase 7 homolog OS=Mus musculus OX=10090 GN=Pus7	4	4	3	525.834	551.44	546.417	534.137	536.219	530.396	582.105	556.462	608.474	525.748	523.702	482.537	541.116	533.579	581.96	510.267	1.1405	0.0119074	0.0529671
O55143	Sarcoplasmic/endoplasmic reticulum calcium ATPase 2 OS=Mus musculus OX=10090 GN=Atp2a2 PE=1 SV=2	27	31	35	5694.17	5678.97	5440.33	4853.99	5101.31	5103.58	5300.97	5034.48	5164.09	5566.78	5601.16	5707.91	5603.27	5018.25	5165.37	5624.96	1.1209	0.000754572	0.00986023
Q8K2L8	Trafficking protein particle complex subunit 12 OS=Mus musculus OX=10090 GN=Trappc12 PE=1 SV=2	4	1	2	113.947	116.278	123.718	143.473	125.779	124.168	125.57	129.745	128.111	126.326	137.514	133.319	117.908	130.857	127.797	132.305	1.1221	0.0869588	0.195168
Q62433	Protein NDRG1 OS=Mus musculus OX=10090 GN=Ndrg1 PE=1 SV=1	6	7	8	722.464	749.764	716.336	750.244	732.193	784.249	880.997	836.007	825.348	717.18	752.92	744.952	729.378	755.256	847.111	738.191	1.16142	0.0010843	0.0124178
P70122	Ribosome maturation protein SBDS OS=Mus musculus OX=10090 GN=Sbds PE=1 SV=4	7	9	9	2141.4	1976.72	2184.41	2331.26	2437.27	2298.2	2247.14	2357.37	2399.61	2264.52	2212.95	2102.09	2098.9	2354.83	2333.82	2192.13	1.12194	0.0229352	0.0821318
E9Q6R1	Integrin, alpha 10 OS=Mus musculus OX=10090 GN=Itga10 PE=3 SV=1		1	2		67.8009	64.2267		67.3349	58.8363		60.6709	57.3892		57.9258	73.2803	65.9896	62.9423	59.0072	65.1523	1.11833	0.699763	0.768869
Q6ZQB6	Inositol hexakisphosphate and diphosphoinositol-pentakisphosphate kinase 2 OS=Mus musculus OX=10090 GN=Ppip5k2 PE=1 SV=3	6	7	6	736.854	732.989	758.721	695.895	714.724	712.58	677.975	665.082	691.357	753.502	751.432	701.568	742.769	707.683	678.053	735.103	1.09544	0.00861415	0.0433667
Q8K4Q8	Collectin-12 OS=Mus musculus OX=10090 GN=Colec12 PE=1 SV=1	7	7	6	1169.07	1108.84	1125.7	1153.39	1185.05	1215.69	1065.95	1035.89	1078.83	1178.63	1237.25	1146.82	1134.25	1184.44	1060.07	1186.98	1.11972	0.00435118	0.0285848
Q9Z1K6	E3 ubiquitin-protein ligase ARIH2 OS=Mus musculus OX=10090 GN=Arih2 PE=1 SV=1	3	3	4	381.699	399.533	385.675	347.1	337.352	368.102	377.86	384.535	358.166	417.277	402.517	411.993	388.895	350.619	373.351	410.55	1.17093	0.00217742	0.0183762
Q99LR1	Monoacylglycerol lipase ABHD12 OS=Mus musculus OX=10090 GN=Abhd12 PE=1 SV=2	1	2	4	183.459	140.682	155.165	135.158	169.674	145.87	141.677	162.532	153.129	161.397	148.803	167.527	158.803	149.558	152.206	159.049	1.06346	0.833753	0.871914
P14602	Heat shock protein beta-1 OS=Mus musculus OX=10090 GN=Hspb1 PE=1 SV=3	5	6	7	1313.16	1338.31	1350.34	1541.19	1567.62	1596.59	1562.54	1559.23	1507.96	1349.29	1301.02	1311.29	1333.85	1568.3	1543.04	1320.37	1.18777	2.70315e-06	0.000380087
Q8C1Z8	tRNA methyltransferase 10 homolog A OS=Mus musculus OX=10090 GN=Trmt10a PE=2 SV=2	2	1	2	81.0649	73.5658	74.7325	78.4232	69.9391	66.5534	31.0952	70.7204	72.2282	86.9872	63.3454	64.0565	76.3846	71.468	54.1562	70.6716	1.41045	0.436218	0.559334
Q9CQN7	39S ribosomal protein L41, mitochondrial OS=Mus musculus OX=10090 GN=Mrpl41 PE=1 SV=1	3	3	3	447.456	391.817	414.474	391.058	396.785	397.411	390.351	396.443	384.968	393.99	437.809	426.002	417.295	395.074	390.559	418.852	1.07244	0.18583	0.318487
P46471	26S proteasome regulatory subunit 7 OS=Mus musculus OX=10090 GN=Psmc2 PE=1 SV=5	27	28	30	7492.84	7386.25	7302.77	7523.19	7549.94	7294.57	7212.61	7460.31	7413.99	7184.03	7016.18	7401.33	7393.54	7455.01	7361.51	7198.79	1.03559	0.240796	0.380787
Q9JJE7	Fatty acid desaturase 3 OS=Mus musculus OX=10090 GN=Fads3 PE=2 SV=2	1	2	4	140.444	182.456	170.478	155.809	150.498	179.783	227.903	181.569	172.504	165.192	174.825	166.584	163.472	161.544	192.544	168.814	1.1919	0.274531	0.412667
E9PZF0	Nucleoside diphosphate kinase OS=Mus musculus OX=10090 GN=Gm20390 PE=3 SV=1	26	23	26	9770.05	10189.4	11202.4	9932.36	9500.2	8874.91	9677.04	9454.85	8825.91	10711	10945.9	11187.2	10370.2	9425.76	9312.2	10946.3	1.17548	0.0145792	0.0609179
Q8CCJ3	E3 UFM1-protein ligase 1 OS=Mus musculus OX=10090 GN=Ufl1 PE=1 SV=2	3	2	6	628.277	603.579	615.706	565.802	619.432	619.821	579.071	593.001	609.167	659.216	616.354	587.672	615.771	601.139	593.619	620.389	1.0451	0.571795	0.670242
Q8VHY0	Chondroitin sulfate proteoglycan 4 OS=Mus musculus OX=10090 GN=Cspg4 PE=1 SV=3	34	30	30	4833.03	4803.14	4857.58	4658.65	4675.64	4568.96	4294.51	4218.87	4245.2	5015.7	5104.24	5130.15	4831.2	4634.18	4252.74	5083.13	1.19526	1.46589e-07	9.8089e-05
Q60680	Inhibitor of nuclear factor kappa-B kinase subunit alpha OS=Mus musculus OX=10090 GN=Chuk PE=1 SV=1	4	5	3	381.179	400.173	424.744	369.5	409.173	376.711	427.036	392.955	378.688	385.729	361.144	383.301	401.638	384.748	399.052	376.56	1.0666	0.433136	0.557059
Q64152	Transcription factor BTF3 OS=Mus musculus OX=10090 GN=Btf3 PE=1 SV=3	8	11	6	603.75	513.778	576.619	521.5	589.882	564.371	516.134	539.658	524.906	585.11	583.176	560.598	563.431	557.864	526.811	576.186	1.09373	0.294088	0.431281
P15532	Nucleoside diphosphate kinase A OS=Mus musculus OX=10090 GN=Nme1 PE=1 SV=1	4	3	5	489.482	491.864	513.561	489.688	502.313	489.063	464.894	481.079	470.574	497.736	466.546	468.603	498.186	493.65	472.135	477.419	1.05518	0.0858403	0.19312
Q99KK9	Probable histidine--tRNA ligase, mitochondrial OS=Mus musculus OX=10090 GN=Hars2 PE=1 SV=1	2	2	3	296.366	254.535	277.765	232.874	246.437	278.843	257.657	300.833	243.751	274.504	259.595	261.041	275.688	251.997	266.341	264.963	1.09401	0.629669	0.712925
Q9ER38	Torsin-3A OS=Mus musculus OX=10090 GN=Tor3a PE=1 SV=2	9	12	9	1674.07	1776.48	1791.14	1880.6	1847.81	1895.84	2034.21	1927.74	1878.32	1783.56	1820.42	1807.14	1746.44	1874.64	1945.68	1803.64	1.11408	0.00859625	0.0433667
O35855	Branched-chain-amino-acid aminotransferase, mitochondrial OS=Mus musculus OX=10090 GN=Bcat2 PE=1 SV=2		4	4		702.558	746.549		732.388	721.147		761.241	713.347		670.875	686.02	724.22	726.746	736.905	678.405	1.08623	0.196489	0.330231
P00375	Dihydrofolate reductase OS=Mus musculus OX=10090 GN=Dhfr PE=1 SV=3	11	16	12	2987.25	3164.65	3211.93	3370.2	3179.25	3211.42	3322.45	3226.7	3152.99	3055.21	3164.51	3158.77	3119.76	3252.56	3233.3	3125.76	1.04257	0.255329	0.394447
Q99LE6	ATP-binding cassette sub-family F member 2 OS=Mus musculus OX=10090 GN=Abcf2 PE=1 SV=1	10	15	15	3013.99	2762.08	2778.41	2745.78	3098.06	2894.69	3182.92	3237.57	3321.84	3004.56	2849.54	2952.31	2849.22	2909.28	3246.94	2934.76	1.13959	0.0225916	0.0812744
Q99J95	Cyclin-dependent kinase 9 OS=Mus musculus OX=10090 GN=Cdk9 PE=1 SV=1	2	2	4	383.74	324.413	348.517	356.593	431.098	364.62	371.074	384.667	385.787	349.08	320.31	361.563	351.388	382.704	380.45	343.21	1.11507	0.253599	0.392941
O54774	AP-3 complex subunit delta-1 OS=Mus musculus OX=10090 GN=Ap3d1 PE=1 SV=1	15	21	15	2229.12	2257.13	2231.29	2401.32	2376.5	2413.22	2224.15	2317.5	2384.49	2288.7	2192.15	2114.28	2239.14	2396.96	2307.78	2197.22	1.09091	0.0195207	0.074001
Q8K2K6	Arf-GAP domain and FG repeat-containing protein 1 OS=Mus musculus OX=10090 GN=Agfg1 PE=1 SV=2	6	6	7	487.293	484.341	473.42	482.757	534.018	512.831	527.844	502.436	532.826	503.032	480.13	481.849	481.647	509.432	520.863	488.227	1.08142	0.0670378	0.164992
Q62086	Serum paraoxonase/arylesterase 2 OS=Mus musculus OX=10090 GN=Pon2 PE=1 SV=2	3	3	4	218.364	250.077	253.7	279.057	249.083	258.334	279.361	260.466	253.222	251.371	268.527	262.898	240.174	261.862	264.123	260.833	1.09972	0.244845	0.384965
Q9CY25	Protein MIS12 homolog OS=Mus musculus OX=10090 GN=Mis12 PE=2 SV=1	2	2	2	298.388	296.279	316.322	318.309	312.084	337.944	326	346.276	320.418	316.746	304.804	284.758	303.532	322.593	330.714	301.812	1.09576	0.0818021	0.187273
P25444	40S ribosomal protein S2 OS=Mus musculus OX=10090 GN=Rps2 PE=1 SV=3	19	17	17	8391.66	7332	7531.39	7428.03	8524.89	7717.01	8546.99	8697.89	8849.41	8780	8591.9	9048.87	7738.35	7876.57	8697.22	8804.93	1.13783	0.0345377	0.106431
Q9CWY9	RPA-interacting protein OS=Mus musculus OX=10090 GN=Rpain PE=1 SV=1	1	1	1	98.3142	111.518	99.2904	113.573	97.1738	108.771	102.571	101.536	93.8184	103.541	107.771	116.119	102.87	106.278	99.2301	109.02	1.09866	0.382496	0.513569
G3X9K3	Brefeldin A-inhibited guanine nucleotide-exchange protein 1 OS=Mus musculus OX=10090 GN=Arfgef1 PE=1 SV=1	2	9	7	313.457	338.753	340.474	395.449	354.437	362.303	368.412	356.719	360.829	321.305	348.714	335.018	330.66	370.312	361.954	334.825	1.11992	0.0292488	0.0954922
Q61161	Mitogen-activated protein kinase kinase kinase kinase 2 OS=Mus musculus OX=10090 GN=Map4k2 PE=1 SV=1	3	1	1	106.046	127.115	101.261	103.146	117.003	109.466	106.398	81.9239	112.177	110.776	100.324	103.462	110.929	109.726	99.2544	104.764	1.11762	0.618143	0.70413
Q9CWU9	Nucleoporin Nup37 OS=Mus musculus OX=10090 GN=Nup37 PE=1 SV=2			3			384.2			387.462			395.558			362.704	384.2	387.462	395.558	362.704	1.09058
Q64191	N(4)-(beta-N-acetylglucosaminyl)-L-asparaginase OS=Mus musculus OX=10090 GN=Aga PE=1 SV=1	1	2	1	76.7273	81.5766	93.0178	89.2217	84.2054	83.3907	86.5684	90.5997	75.9421	85.6249	81.7606	85.7916	83.5014	85.5676	84.1375	84.3716	1.02474	0.978385	0.981108
Q9CR68	Cytochrome b-c1 complex subunit Rieske, mitochondrial OS=Mus musculus OX=10090 GN=Uqcrfs1 PE=1 SV=1		3	2		315.7	269.952		299.38	303.249		274.67	299.008		289.058	306.599	291.931	301.309	286.581	297.699	1.05139	0.878151	0.905606
Q8R1X6	Spartin OS=Mus musculus OX=10090 GN=Spart PE=1 SV=1	7	4	13	1499.19	1538.12	1540.91	1550.2	1542.1	1582.6	1622.73	1530.41	1552.82	1467.87	1529.34	1463.65	1525.95	1558.2	1568.17	1486.65	1.05483	0.067107	0.164992
E9Q512	Thyroid hormone receptor interactor 11 OS=Mus musculus OX=10090 GN=Trip11 PE=1 SV=1	9	9	12	1391.01	1367.84	1374.52	1365.06	1460.93	1475.29	1398.48	1349.6	1352.83	1385.51	1361.7	1337.43	1377.75	1432.91	1366.79	1361.4	1.05253	0.126789	0.247346
Q9DCN2	NADH-cytochrome b5 reductase 3 OS=Mus musculus OX=10090 GN=Cyb5r3 PE=1 SV=3	21	21	23	11008.5	10792.5	11238.9	11139.3	11729.4	11258	11202.2	11276.8	10948.1	11384.8	10936.1	11289.8	11011.8	11372.7	11141.5	11201.9	1.03277	0.381333	0.512529
P97298	Pigment epithelium-derived factor OS=Mus musculus OX=10090 GN=Serpinf1 PE=1 SV=2	2	3	4	534.336	471.955	484.394	399.868	482.352	472.985	451.573	455.42	503.617	552.484	528.533	477.265	496.179	450.169	469.62	518.462	1.15171	0.208579	0.344251
P22682	E3 ubiquitin-protein ligase CBL OS=Mus musculus OX=10090 GN=Cbl PE=1 SV=3	3	6	4	479.812	420.346	427.671	386.702	393.419	400.056	347.455	408.91	428.768	433.487	424.78	390.961	441.838	393.355	393.474	415.998	1.12326	0.227653	0.365807
Q52KI8	Serine/arginine repetitive matrix protein 1 OS=Mus musculus OX=10090 GN=Srrm1 PE=1 SV=2	2	2	5	440.435	432.704	420.059	434.942	400.993	423.365	374.415	420.9	410.217	455.19	450.386	451.341	430.984	419.528	401.343	452.301	1.12697	0.0317407	0.100387
P80316	T-complex protein 1 subunit epsilon OS=Mus musculus OX=10090 GN=Cct5 PE=1 SV=1	39	51	49	11254.1	11141.5	10768.1	10589.9	10919.4	10697.4	10276.1	10193.6	10680.2	10085.6	9951.16	10060.1	11052.6	10734.7	10381.2	10032.1	1.10172	0.00134183	0.0140705
Q8BWY3	Eukaryotic peptide chain release factor subunit 1 OS=Mus musculus OX=10090 GN=Etf1 PE=1 SV=4	17	16	15	4156.22	4221.97	4395.72	4625.96	4534.68	4302.39	4596.8	4552.01	4352.02	3980.55	4050.86	4309.41	4256.78	4485.59	4499.01	4111.21	1.09433	0.0354104	0.108407
P56376	Acylphosphatase-1 OS=Mus musculus OX=10090 GN=Acyp1 PE=1 SV=2	4	6	6	1557.1	1579.79	1551.12	1581.65	1460.38	1659.02	1596.18	1674.17	1533.03	1644.38	1664.96	1636.14	1562.62	1564.86	1600.09	1648.45	1.05493	0.370522	0.504656
Q91VA7	Isocitrate dehydrogenase [NAD] subunit, mitochondrial OS=Mus musculus OX=10090 GN=Idh3b PE=1 SV=1	11	11	21	3057.99	3015.73	3047.85	2985.13	3044.21	3020.74	2906.55	2909.05	2975.11	3009.02	2989.68	2914.99	3040.47	3016.6	2930.07	2970.95	1.03768	0.0259677	0.08937
Q99J23	GH3 domain-containing protein OS=Mus musculus OX=10090 GN=Ghdc PE=2 SV=2	2	1	1	30.0517	32.8835	37.9683	33.2351	37.8481	32.104	33.309	34.705	36.718	40.0309	31.19	29.8363	33.4777	34.3084	34.8828	33.3978	1.04446	0.954504	0.96314
Q9D3D9	ATP synthase subunit delta, mitochondrial OS=Mus musculus OX=10090 GN=Atp5d PE=1 SV=1	2	2	1	548.948	555.343	525.584	480.914	520.944	534.9	514.651	487.53	477.011	512.645	493.341	519.662	543.14	511.733	492.812	508.427	1.10213	0.0831118	0.18907
P56390	Cyclin-dependent kinases regulatory subunit 2 OS=Mus musculus OX=10090 GN=Cks2 PE=1 SV=1	2	1	1	119.084	175.838	150.441	155.437	125.341	134.515	135.233	118.765	118.132	159.173	148.983	165.839	146.592	137.871	123.798	157.845	1.27502	0.173708	0.305491
Q8CIG8	Protein arginine N-methyltransferase 5 OS=Mus musculus OX=10090 GN=Prmt5 PE=1 SV=3	5	8	7	1070.04	1124.44	1092.47	1113.07	990.668	1065.47	1157.36	1139.22	1134.77	1012.07	1098.22	1059.83	1095.42	1055.19	1143.74	1056.12	1.08392	0.0968771	0.209401
Q8K354	Carbonyl reductase [NADPH] 3 OS=Mus musculus OX=10090 GN=Cbr3 PE=1 SV=1	4	6	2	604.392	607.837	614.577	608.503	583.473	638.503	642.806	646.388	615.627	587.441	605.443	574.435	608.921	609.746	634.79	588.969	1.0778	0.0831973	0.189173
P02469	Laminin subunit beta-1 OS=Mus musculus OX=10090 GN=Lamb1 PE=1 SV=3	13	17	13	1592.18	1663.45	1676.64	1447.7	1633.58	1607.6	1610.39	1437.62	1406.39	1749.87	1665.48	1709.52	1643.67	1560.74	1482.15	1707.94	1.15234	0.047251	0.131897
O35435	Dihydroorotate dehydrogenase (quinone), mitochondrial OS=Mus musculus OX=10090 GN=Dhodh PE=1 SV=2	2	4	5	255.493	313.634	329.08	360.354	332.229	303.845	345.157	296.75	315.276	310.518	328.909	323.322	297.647	331.339	318.444	320.823	1.1132	0.546849	0.649123
Q9D2R8	28S ribosomal protein S33, mitochondrial OS=Mus musculus OX=10090 GN=Mrps33 PE=1 SV=1	1	2	1	218.85	201.236	180.991	157.538	185.336	189.753	159.703	188.545	179.607	222.675	183.651	208.416	199.757	176.948	175.53	204.267	1.16372	0.180147	0.31229
P29037	TATA-box-binding protein OS=Mus musculus OX=10090 GN=Tbp PE=1 SV=1	1	1	1	42.3278	44.7463	52.6024	51.9153	48.7098	48.6881	40.4326	44.5826	43.853	53.0234	49.6604	42.5556	46.3585	49.7483	42.9173	48.2108	1.15917	0.254091	0.393182
Q9CY21	Probable 18S rRNA (guanine-N(7))-methyltransferase OS=Mus musculus OX=10090 GN=Bud23 PE=1 SV=1		2	1		22.9367	21.308		22.412	19.5196		23.7911	29.8556		20.4571	18.9138	22.1073	20.9158	26.6514	19.6703	1.35491	0.137084	0.259121
Q2YDW2	Protein misato homolog 1 OS=Mus musculus OX=10090 GN=Msto1 PE=1 SV=1	5	6	6	827.541	827.44	799.778	787.328	745.796	766.425	746.139	735.37	752.825	769.618	822.02	811.598	818.148	766.329	744.743	800.754	1.09856	0.00672141	0.0373789
Q91VR2	ATP synthase subunit gamma, mitochondrial OS=Mus musculus OX=10090 GN=Atp5c1 PE=1 SV=1	1	1	1	70.2903	71.8929	69.9533	65.8577	71.6118	60.2648	68.2872	62.3734	66.6752	69.1815	67.7386	76.7234	70.7071	65.7484	65.7306	71.1079	1.08181	0.262982	0.401764
P52019	Squalene monooxygenase OS=Mus musculus OX=10090 GN=Sqle PE=2 SV=1	1	3	3	157.891	165.049	161.411	192.056	170.13	178.608	144.016	157.245	154.454	169.358	170.897	168.849	161.424	180.04	151.797	169.699	1.18606	0.00459445	0.0297655
Q60967	Bifunctional 3'-phosphoadenosine 5'-phosphosulfate synthase 1 OS=Mus musculus OX=10090 GN=Papss1 PE=1 SV=1	6	8	5	1369.81	1371.95	1428.14	1350.37	1261.48	1372.58	1356.27	1336.03	1310.54	1331.08	1438.07	1296.28	1389.71	1327.26	1334.15	1353.82	1.04705	0.489512	0.603739
Q8VBW6	NEDD8-activating enzyme E1 regulatory subunit OS=Mus musculus OX=10090 GN=Nae1 PE=1 SV=1	13	13	21	1821.2	1909.91	1848.97	1941.94	1856.8	1877.14	1896.52	1917.2	1964.52	1927.34	1903.1	1896.37	1859.66	1891.61	1925.87	1908.89	1.03561	0.234924	0.374918
Q8BTY8	Sec1 family domain-containing protein 2 OS=Mus musculus OX=10090 GN=Scfd2 PE=1 SV=1	1	2	4	162.682	154.825	158.701	155.349	161.109	150.325	153.21	169.975	164.488	170.058	155.391	167.785	158.704	155.532	162.406	164.283	1.05626	0.433713	0.557341
P57722	Poly(rC)-binding protein 3 OS=Mus musculus OX=10090 GN=Pcbp3 PE=1 SV=3	1	1	2	126.732	103.893	118.453	117.044	110.371	108.915	103.987	120.168	106.677	104.409	117.74	118.128	115.968	112.055	110.056	113.241	1.05372	0.856502	0.889546
Q8BKZ9	Pyruvate dehydrogenase protein X component, mitochondrial OS=Mus musculus OX=10090 GN=Pdhx PE=1 SV=1	3	2	2	260.043	243.235	254.807	238.491	245.5	249.08	245.562	225.231	240.948	259.095	289.225	258.357	252.597	244.317	237.085	268.517	1.13258	0.0429021	0.123058
Q01405	Protein transport protein Sec23A OS=Mus musculus OX=10090 GN=Sec23a PE=1 SV=2	17	9	16	2048.12	2029.51	2156.55	2051.36	2020.71	2060.84	2248.3	2236.23	2060.35	2129.3	2190.64	2199.34	2077.31	2044.23	2179.9	2172.87	1.06637	0.0830761	0.18907
Q8BX70	Vacuolar protein sorting-associated protein 13C OS=Mus musculus OX=10090 GN=Vps13c PE=1 SV=2	17	18	17	2003.44	2000.11	1968.24	1964.75	1994.27	1955.12	1897.79	1995.16	1934.11	1981.69	1858.14	1990.2	1990.53	1971.31	1941.94	1942.39	1.02502	0.550612	0.652114
Q05CL8	La-related protein 7 OS=Mus musculus OX=10090 GN=Larp7 PE=1 SV=2	5	8	4	1408.71	1429.02	1254.96	1269.63	1366.67	1374.22	1401.26	1375.02	1436.37	1386.33	1295.22	1400.38	1361.96	1335.98	1403.99	1359.84	1.05091	0.663554	0.740373
O88520	Leucine-rich repeat protein SHOC-2 OS=Mus musculus OX=10090 GN=Shoc2 PE=1 SV=2	3	2	3	221.505	219.488	208.065	215.581	205.095	211.593	203.235	207.835	221.1	203.238	211.141	202.801	216.271	210.712	210.589	205.691	1.05144	0.369817	0.50458
Q9CWJ9	Bifunctional purine biosynthesis protein PURH OS=Mus musculus OX=10090 GN=Atic PE=1 SV=2	22	30	29	5713.36	6071.83	5870.5	5868.85	5684	5581.01	5901.26	5715.95	5795.06	5769.39	5781.08	6006.29	5883.4	5710.05	5803.6	5851.25	1.03036	0.496213	0.608724
Q8VEJ9	Vacuolar protein sorting-associated protein 4A OS=Mus musculus OX=10090 GN=Vps4a PE=1 SV=1	2	2	1	230.006	256.593	197.423	251.617	225.171	291.131	263.807	245.723	249.174	213.311	231.254	221.013	226.705	254.554	252.781	221.738	1.14799	0.248256	0.38761
Q8BGB7	Enolase-phosphatase E1 OS=Mus musculus OX=10090 GN=Enoph1 PE=1 SV=1	2	4	1	204.107	228.367	244.617	219.229	207.004	214.486	230.605	194.383	200.381	203.067	227.254	197.524	225.074	213.513	207.871	208.893	1.08276	0.58304	0.678401
Q91VE0	Long-chain fatty acid transport protein 4 OS=Mus musculus OX=10090 GN=Slc27a4 PE=1 SV=1	3	3	5	320.932	308.269	318.319	288.908	279.747	284.402	282.573	275.683	280.536	294.96	323.674	304.116	315.792	284.328	279.582	307.353	1.12951	0.00171845	0.0161631
O55131	Septin-7 OS=Mus musculus OX=10090 GN=Sept7 PE=1 SV=1	28	27	33	6586.15	6154.27	6302.7	6665.46	6972.51	6955.37	6717.33	6891.37	6603.44	6542.23	6493.02	6649.66	6345.2	6862.99	6736.34	6561.31	1.0816	0.0217587	0.0790061
Q9R0Q3	Transmembrane emp24 domain-containing protein 2 OS=Mus musculus OX=10090 GN=Tmed2 PE=1 SV=1	6	4	5	463.568	459.593	458.46	470.518	427.024	463.089	436.076	435.303	435.123	451.021	499.262	464.511	460.535	453.139	435.5	471.166	1.08189	0.142145	0.26611
P39098	Mannosyl-oligosaccharide 1,2-alpha-mannosidase IB OS=Mus musculus OX=10090 GN=Man1a2 PE=1 SV=1	2	2	1	40.3829	37.3165	31.4893	38.4557	37.7322	53.3001	29.3905	35.6707	31.3742	38.6533	36.163	30.7188	36.2037	42.6056	32.0403	35.0175	1.32975	0.166611	0.296846
Q8C8U0	Liprin-beta-1 OS=Mus musculus OX=10090 GN=Ppfibp1 PE=1 SV=3	19	20	26	2599.35	2512.09	2564.05	2627.13	2692.17	2568.44	2547.7	2560.58	2547.07	2435.99	2445.32	2530.61	2558.25	2628.76	2551.78	2470.27	1.06416	0.0192409	0.0731737
Q922Q8	Leucine-rich repeat-containing protein 59 OS=Mus musculus OX=10090 GN=Lrrc59 PE=1 SV=1	11	7	12	2232.21	1756.22	2069.67	2104.48	2509.2	2035.34	2230.44	2468.71	2304.83	2079.86	1912.86	2237.15	2009.43	2206.85	2332.56	2072.39	1.16081	0.298717	0.435885
Q8BR92	Paralemmin-2 OS=Mus musculus OX=10090 GN=Palm2 PE=1 SV=1	5	1	1	388.162	403.704	394.985	439.376	418.634	433.034	496.633	425.021	460.358	362.107	438.917	397.901	395.566	430.26	459.742	398.411	1.16224	0.0613408	0.156322
Q8JZL3	Thiamine-triphosphatase OS=Mus musculus OX=10090 GN=Thtpa PE=1 SV=3	1	2	2	123.168	127.701	130.171	122.944	115.256	89.8232	134.098	135.068	114.181	130.058	132.242	176.094	126.98	108.373	127.406	144.683	1.33505	0.130358	0.250406
E9PYG6	RAS p21 protein activator 1 OS=Mus musculus OX=10090 GN=Rasa1 PE=1 SV=1	7	7	8	846.755	884.33	873.225	932.877	932.849	936.066	906.806	909.241	882.336	890.034	850.052	884.845	867.959	933.929	899.378	874.795	1.07601	0.00538104	0.0324576
Q3UA06	Pachytene checkpoint protein 2 homolog OS=Mus musculus OX=10090 GN=Trip13 PE=1 SV=1	8	5	7	718.054	669.273	718.686	779.615	788.277	766.658	727.962	772.164	752.077	671.063	666.98	659.273	701.617	778.132	750.516	665.754	1.1688	0.000406763	0.00707694
Q6ZPE2	Myotubularin-related protein 5 OS=Mus musculus OX=10090 GN=Sbf1 PE=1 SV=2	9	7	7	618.267	578.455	570.009	538.369	585.942	592.112	525.942	551.406	549.761	598.128	564.904	568.825	588.54	571.627	542.244	577.097	1.08538	0.149134	0.2748
Q9JK92	Heat shock protein beta-8 OS=Mus musculus OX=10090 GN=Hspb8 PE=1 SV=1	1	2	5	493.191	443.317	413.218	199.66	387.701	381.66	354.681	327.251	349.284	516.789	406.052	420.159	448.714	309.14	343.531	445.078	1.45149	0.135734	0.257713
Q9CR57	60S ribosomal protein L14 OS=Mus musculus OX=10090 GN=Rpl14 PE=1 SV=3	4	5	6	1475.64	1239.06	1260.44	1302.69	1469.55	1356.93	1385.67	1469	1512.27	1537.11	1523.51	1571.47	1320.89	1374.66	1454.69	1543.9	1.16884	0.0642303	0.160749
Q03146	Epithelial discoidin domain-containing receptor 1 OS=Mus musculus OX=10090 GN=Ddr1 PE=2 SV=2	1	2	1	68.6064	61.6499	51.5892	47.6574	53.6337	49.1725	43.2362	44.6949	62.5493	64.6504	64.1719	60.8394	60.2031	50.0914	49.4435	63.1976	1.27818	0.10767	0.223341
Q8BH95	Enoyl-CoA hydratase, mitochondrial OS=Mus musculus OX=10090 GN=Echs1 PE=1 SV=1	8	7	8	2075.16	2030.42	2083.13	2114.95	2056.42	2113.31	2015.66	2197.69	2086.15	2171.94	2093.19	2095.13	2062.77	2094.71	2098.51	2119.77	1.02763	0.664551	0.740957
O08648	Mitogen-activated protein kinase kinase kinase 4 OS=Mus musculus OX=10090 GN=Map3k4 PE=1 SV=2	2	6	8	556.435	584.985	591.32	602.373	581.051	594.325	620.053	599.174	596.986	576.653	590.304	572.884	577.378	592.518	605.315	579.899	1.04839	0.112687	0.229291
P42932	T-complex protein 1 subunit theta OS=Mus musculus OX=10090 GN=Cct8 PE=1 SV=3	46	44	39	18082.2	18019.2	18066	17566.4	17973.3	17144.7	17749.2	17718.6	17973.4	17138.1	16824.7	17351.7	18055.8	17558.2	17813.3	17103.5	1.05568	0.0104225	0.0483557
P11983	T-complex protein 1 subunit alpha OS=Mus musculus OX=10090 GN=Tcp1 PE=1 SV=3	44	41	41	12130.4	11965.8	11723.6	11526.2	11499.9	11239.1	10592.8	10513	11049.9	10732.3	11003	10969.1	11938.8	11421	10716	10900.8	1.11411	0.000418976	0.00716582
Q9ER41	Torsin-1B OS=Mus musculus OX=10090 GN=Tor1b PE=1 SV=2	3	3	4	313.171	327.316	324.343	339.527	303.925	334.932	332.64	338.091	317.806	294.273	310.278	302.53	321.552	325.736	329.4	302.29	1.08968	0.0964432	0.209141
Q9CQV8	14-3-3 protein beta/alpha OS=Mus musculus OX=10090 GN=Ywhab PE=1 SV=3	15	18	18	7380.76	7500.42	7641.92	7903.44	7593.47	7707.87	8019.28	8065.18	7735.57	7387.84	7532.25	7605.96	7506.94	7733.87	7938.66	7508.14	1.05751	0.018987	0.0726952
P61979	Heterogeneous nuclear ribonucleoprotein K OS=Mus musculus OX=10090 GN=Hnrnpk PE=1 SV=1	23	1	27	567.375	949.424	556.91	550.094	320.012	534.453	546.399	192.876	565.017	605.646	807.202	613.133	669.43	454.818	390.496	669.245	1.71431	0.276422	0.414191
Q4VBE8	WD repeat-containing protein 18 OS=Mus musculus OX=10090 GN=Wdr18 PE=1 SV=1	1	1	1	47.919	48.5944	52.3842	46.7115	47.6974	44.4211	46.2389	40.8963	44.2953	50.6208	54.302	50.3894	49.5943	46.2561	43.7539	51.7402	1.18253	0.0119423	0.0530215
Q9DCT2	NADH dehydrogenase [ubiquinone] iron-sulfur protein 3, mitochondrial OS=Mus musculus OX=10090 GN=Ndufs3 PE=1 SV=2	3	6	3	357.187	349.335	319.913	326.341	335.798	332.394	318.374	307.255	329.157	314.178	323.692	334.617	341.762	331.488	318.136	324.055	1.07426	0.196133	0.329869
P47857	ATP-dependent 6-phosphofructokinase, muscle type OS=Mus musculus OX=10090 GN=Pfkm PE=1 SV=3	26	22	18	4209.55	4260.89	4263.07	4403.85	4244.26	4404.69	4322.48	4282.7	4277.7	4037.6	4185.63	4028.02	4244.43	4350.28	4294.25	4083.12	1.06543	0.00617987	0.0354734
P27641	X-ray repair cross-complementing protein 5 OS=Mus musculus OX=10090 GN=Xrcc5 PE=1 SV=4	6	5	6	704.969	727.847	721.006	736.691	771.367	724.111	719.854	694.033	693.813	709.683	677.951	732.268	717.876	743.79	702.462	706.281	1.05883	0.140926	0.264568
Q920E5	Farnesyl pyrophosphate synthase OS=Mus musculus OX=10090 GN=Fdps PE=1 SV=1	25	27	26	6290.15	6536.9	6523.16	6106.32	6087.38	5884.05	5529.55	5450.68	5281.99	6110.05	5961.1	6346.86	6449.07	6025.07	5419.75	6137.29	1.18992	0.000168085	0.00421022
P62889	60S ribosomal protein L30 OS=Mus musculus OX=10090 GN=Rpl30 PE=1 SV=2	6	6	7	1306.19	1160.95	1204.49	1226.01	1418.57	1342.82	1419.93	1479.48	1494.22	1483.51	1376.64	1394.1	1222.39	1326.75	1464.19	1417.32	1.19781	0.0142274	0.0598214
P97470	Serine/threonine-protein phosphatase 4 catalytic subunit OS=Mus musculus OX=10090 GN=Ppp4c PE=1 SV=2	2	6	5	465.553	510.959	466.441	488.007	466.072	481.87	430.187	422.755	463.038	523.388	507.349	495.785	480.526	478.56	438.316	508.716	1.16061	0.0125076	0.0548553
Q80X85	28S ribosomal protein S7, mitochondrial OS=Mus musculus OX=10090 GN=Mrps7 PE=1 SV=1	1	2	2	64.5628	64.2679	58.4726	57.5731	50.8796	57.5501	47.7798	59.7565	63.5445	72.225	67.2367	62.5735	62.3701	55.242	56.6112	67.2297	1.217	0.112473	0.228954
P14869	60S acidic ribosomal protein P0 OS=Mus musculus OX=10090 GN=Rplp0 PE=1 SV=3	16	14	19	6576.39	5773.08	6103.11	6149.05	6810.17	6309.02	6806.49	7247.08	7105.32	6816.14	6517.74	6830.63	6142.08	6416.67	7050.55	6719.94	1.14791	0.0338489	0.105208
Q8BIA4	F-box/WD repeat-containing protein 8 OS=Mus musculus OX=10090 GN=Fbxw8 PE=1 SV=2	3	2	1	141.208	121.139	147.798	126.406	135.121	116.393	118.297	137.165	120.718	141.368	133.854	142.37	136.23	125.74	125.121	139.145	1.11208	0.290407	0.427178
Q8VCR7	Protein ABHD14B OS=Mus musculus OX=10090 GN=Abhd14b PE=1 SV=1	9			1992.49			2026.66			2075.18			2013.68			1992.49	2026.66	2075.18	2013.68	1.0415
Q8BM39	Pre-mRNA-splicing factor 18 OS=Mus musculus OX=10090 GN=Prpf18 PE=1 SV=1	1	2		131.621	108.504		111.654	127.819		114.702	122.467		124.798	123.984		119.505	119.463	118.521	124.39	1.04952	0.93926	0.951859
Q9JKZ2	Sodium/myo-inositol cotransporter OS=Mus musculus OX=10090 GN=Slc5a3 PE=1 SV=2	5	10	9	970.769	1001.11	993.728	978.217	994.357	1038.5	1105.98	1050.94	1040.53	987.618	996.177	969.833	988.451	1003.37	1065.44	984.481	1.08223	0.0154023	0.0630502
Q9DBT5	AMP deaminase 2 OS=Mus musculus OX=10090 GN=Ampd2 PE=1 SV=1	12	10	11	1447.43	1519.19	1452.2	1448.44	1421.65	1442.13	1402.41	1442.2	1454.21	1477.52	1392.77	1427.26	1472.58	1437.36	1432.77	1432.1	1.02827	0.428133	0.552445
Q8VHX6	Filamin-C OS=Mus musculus OX=10090 GN=Flnc PE=1 SV=3	73	77	81	21152	21002.3	21622.7	20965	20858.5	20730.9	20525.3	20784.3	20502.5	21975.7	21973	21761.9	21257.4	20851.2	20603.6	21903.3	1.06308	0.000223666	0.00514075
Q8VHE0	Translocation protein SEC63 homolog OS=Mus musculus OX=10090 GN=Sec63 PE=1 SV=4	6	8	14	1192.79	1135.53	1118.69	1012.18	1155.96	1180.46	1268.52	1136.55	1148.79	1122.65	1168.09	1148.2	1148.57	1113.65	1183.16	1146.16	1.06241	0.630391	0.713397
O88572	Low-density lipoprotein receptor-related protein 6 OS=Mus musculus OX=10090 GN=Lrp6 PE=1 SV=1	1	1	2	213.532	194.946	205.844	211.299	200.755	200.32	162.842	185.472	180.105	198.271	204.772	199.674	204.631	204.063	175.869	200.886	1.16354	0.00872077	0.0435481
Q8CGF7	Transcription elongation regulator 1 OS=Mus musculus OX=10090 GN=Tcerg1 PE=1 SV=2	5	7	9	1105.38	904.861	1006.88	1033.88	1129.25	1074.15	1156.87	1219.23	1230.66	1149.7	1192.48	1134.13	1002.36	1078.39	1201.81	1158.51	1.19898	0.022683	0.0815405
Q9D684	Ras and Rab interactor 2 OS=Mus musculus OX=10090 GN=Rin2 PE=1 SV=3		1	1		37.0844	17.2105		36.0245	49.7973		32.7402	43.5189		39.8591	35.1815	25.2634	42.3548	37.7468	37.4473	1.67652	0.46859	0.585612
Q5DTU0	Actin filament-associated protein 1-like 2 OS=Mus musculus OX=10090 GN=Afap1l2 PE=1 SV=2	7	9	10	1271.23	1273.72	1286.69	1304.97	1368.9	1352.94	1290.77	1335.88	1368.22	1386.38	1274.85	1245.49	1277.2	1341.99	1331.24	1300.85	1.05073	0.341788	0.478368
Q3TQN1	Protein-tyrosine sulfotransferase OS=Mus musculus OX=10090 GN=Tpst2 PE=1 SV=1		1	1		169.966	160.484		182.139	172.867		166.389	171.922		146.584	159.805	165.157	177.443	169.133	153.052	1.15936	0.100247	0.213144
P70697	Uroporphyrinogen decarboxylase OS=Mus musculus OX=10090 GN=Urod PE=1 SV=2	6	5	7	727.396	769.95	769.792	742.982	685.395	702.273	694.761	707.578	692.357	764.495	766.711	765.213	755.444	709.81	698.2	765.473	1.09635	0.00733648	0.0394536
Q3UJB0	Splicing factor 3b, subunit 2 OS=Mus musculus OX=10090 GN=Sf3b2 PE=1 SV=1	3	6	10	1337.38	1166.7	1119.56	1073.72	1187.32	1154.43	1057.25	1189.05	1280.56	1316.68	1241.98	1230.49	1204.35	1137.48	1172	1262.48	1.1099	0.41546	0.542519
Q91WG8	Bifunctional UDP-N-acetylglucosamine 2-epimerase/N-acetylmannosamine kinase OS=Mus musculus OX=10090 GN=Gne PE=1 SV=1	5	3	1	227.347	239.229	215.967	228.144	214.033	194.257	223.483	233.74	237.014	224.353	216.325	256.088	227.316	211.685	231.34	231.638	1.09426	0.367602	0.503141
P24288	Branched-chain-amino-acid aminotransferase, cytosolic OS=Mus musculus OX=10090 GN=Bcat1 PE=1 SV=2	7	7	7	767.587	827.43	766.782	685.549	653.923	650.06	722.906	695.269	702.171	694.192	693.612	751.222	786.763	662.989	706.685	712.505	1.18669	0.00293291	0.0223742
Q8BHD7	Polypyrimidine tract-binding protein 3 OS=Mus musculus OX=10090 GN=Ptbp3 PE=1 SV=1	3	4	5	290.564	249.063	244.313	251.337	257.35	272.434	254.639	276.383	286.829	266.19	279.935	259.155	260.515	260.224	272.283	268.289	1.04634	0.772638	0.825673
Q4LDD4	Arf-GAP with Rho-GAP domain, ANK repeat and PH domain-containing protein 1 OS=Mus musculus OX=10090 GN=Arap1 PE=1 SV=2	12	11	12	1165.73	1211.24	1174.88	1181.87	1075.35	1191.95	1055.85	1307.94	1132.46	1221.04	1029.96	1125.19	1183.79	1148.49	1160.75	1122.69	1.05442	0.854889	0.888937
P08113	Endoplasmin OS=Mus musculus OX=10090 GN=Hsp90b1 PE=1 SV=2	46	65	59	31208.3	32630.6	32439.4	33024.4	31190.9	32296.3	31387.6	31431.8	30214.8	30626.5	30993.6	31296.3	32086.5	32161.7	31006.2	30970.9	1.03845	0.128607	0.249027
Q78YZ6	Short coiled-coil protein OS=Mus musculus OX=10090 GN=Scoc PE=1 SV=1	2	1	3	44.9602	47.5766	38.5602	40.3253	43.899	45.2428	46.0368	37.9891	42.4452	41.2674	43.125	46.3415	43.5298	43.105	42.0272	43.528	1.03575	0.947433	0.957655
O08795-2	Isoform 2 of Glucosidase 2 subunit beta OS=Mus musculus OX=10090 GN=Prkcsh	9	14	18	3883.94	4006.94	3931.38	3750.04	3776.5	3849.36	3675.65	3944.74	3838.89	4220.18	3801.62	3910.18	3940.43	3791.73	3818.15	3973.43	1.04792	0.317501	0.455351
Q9D8C4	Interferon-induced 35 kDa protein homolog OS=Mus musculus OX=10090 GN=Ifi35 PE=1 SV=3	4	2	3	186.945	197.977	212.443	202.563	187.234	210.783	210.116	200.252	182.997	213.261	227.421	206.663	198.849	199.952	197.466	215.61	1.09188	0.327258	0.464086
E9PYF4	LIM domain only 7 OS=Mus musculus OX=10090 GN=Lmo7 PE=1 SV=1	5	3	4	577.241	522.388	581.395	576.8	540.572	573.402	545.747	648.356	552.055	565.318	553.789	558.254	559.681	563.351	580.224	559.1	1.03778	0.855114	0.888937
Q91X78	Erlin-1 OS=Mus musculus OX=10090 GN=Erlin1 PE=1 SV=1	1		1	48.508		40.9105	45.56		55.7718	48.6524		56.3197	46.6648		36.3833	44.5476	50.408	52.3459	41.2046	1.27039	0.395806	0.525497
P50431	Serine hydroxymethyltransferase, cytosolic OS=Mus musculus OX=10090 GN=Shmt1 PE=1 SV=3	11	14	13	2534.52	2527.59	2482.6	2732.53	2600.53	2702.55	2833.37	2883.32	2950.3	2457.48	2546.46	2422.45	2514.8	2677.94	2888.6	2474.92	1.16715	8.72042e-05	0.0027977
Q6PGH1	Protein BUD31 homolog OS=Mus musculus OX=10090 GN=Bud31 PE=1 SV=2	4	3		336.84	299.754		327.154	373.85		339.084	358.021		355.889	327.342		317.756	349.723	348.424	341.317	1.1006	0.568697	0.667112
Q91V36	Nuclear receptor-binding protein 2 OS=Mus musculus OX=10090 GN=Nrbp2 PE=1 SV=2	1	1		115.98	124.062		138.219	123.035		171.428	174.17		116.016	120.377		119.953	130.406	172.793	118.176	1.46216	0.00461304	0.0298029
Q9DC63	F-box only protein 3 OS=Mus musculus OX=10090 GN=Fbxo3 PE=1 SV=1	1	2	3	224.388	206.256	205.075	186.79	211.475	200.754	185.389	184.532	202.316	217.13	211.435	205.552	211.725	199.416	190.573	211.319	1.11099	0.0880515	0.19649
Q80U93	Nuclear pore complex protein Nup214 OS=Mus musculus OX=10090 GN=Nup214 PE=1 SV=2	3	5	6	786.35	706.334	777.647	863.872	898.213	769.922	746.536	843.995	784.084	752.692	700.907	817.797	755.909	842.219	790.529	755.627	1.1146	0.263857	0.402479
E9PZJ8	Activating signal cointegrator 1 complex subunit 3 OS=Mus musculus OX=10090 GN=Ascc3 PE=1 SV=1	5	3	2	278.396	228.694	224.73	235.573	268.046	259.661	237.877	265.242	290.288	267.042	256.906	244.208	242.769	254.047	263.598	255.881	1.0858	0.721699	0.78688
Q9D2R0	Acetoacetyl-CoA synthetase OS=Mus musculus OX=10090 GN=Aacs PE=1 SV=1	18	21	20	6344.98	6414.67	6113.07	6208.91	6059.64	5961.9	5374.03	5546.45	5840.82	5996.86	5904.03	6008.99	6289.58	6075.97	5583.8	5969.77	1.1264	0.00403887	0.0272203
Q9CZX8	40S ribosomal protein S19 OS=Mus musculus OX=10090 GN=Rps19 PE=1 SV=3	12	10	11	4922.03	4351.04	4368.45	4442.83	4967.56	4716.88	4893.18	4849.1	5329.58	5368.21	5458.55	5211.32	4539.64	4704.2	5019.36	5345.05	1.17742	0.0236807	0.0840307
Q3UFY8	tRNA methyltransferase 10 homolog C OS=Mus musculus OX=10090 GN=Trmt10c PE=1 SV=2	2	3	2	236.865	289.903	281.119	277.931	277.208	279.44	342.758	302.306	312.331	282.954	271.091	267.618	268.255	278.192	318.677	273.81	1.18796	0.043669	0.124647
Q91W86	Vacuolar protein sorting-associated protein 11 homolog OS=Mus musculus OX=10090 GN=Vps11 PE=1 SV=3	2	2	3	243.062	200.269	206.366	211.581	231.823	214.015	201.076	220.265	215.932	211.772	215.133	231.178	215.769	218.957	212.263	219.2	1.03268	0.924685	0.941571
P08003	Protein disulfide-isomerase A4 OS=Mus musculus OX=10090 GN=Pdia4 PE=1 SV=3	35	40	44	13735.3	14221.7	14479.2	15057.9	14187.5	14659.5	14638	14215.8	14266.4	13891.6	14697.8	13917.6	14142	14630.7	14372.2	14164.1	1.03455	0.426835	0.551834
P23780	Beta-galactosidase OS=Mus musculus OX=10090 GN=Glb1 PE=1 SV=1	9	7	12	1834.52	1840.88	1825.24	1871.12	1850.03	1938.67	1863.8	1963.7	1913.57	1972.42	1887.23	1864.38	1833.54	1886.23	1913.26	1907.45	1.04348	0.181952	0.314025
P16330	2',3'-cyclic-nucleotide 3'-phosphodiesterase OS=Mus musculus OX=10090 GN=Cnp PE=1 SV=3	4	3	5	707.521	677.237	686.888	689.479	670.886	681.423	642.893	681.694	695.538	731.528	741.604	707.571	690.434	680.553	673.002	726.76	1.07988	0.0355387	0.108657
Q922U2	Keratin, type II cytoskeletal 5 OS=Mus musculus OX=10090 GN=Krt5 PE=1 SV=1	2	2	2	198.094	155.405	246.907	171.651	147.398	179.707	130.586	176.015	121.774	197.649	219.162	149.592	196.618	165.666	140.929	186.433	1.39516	0.217265	0.354378
O35954	Membrane-associated phosphatidylinositol transfer protein 1 OS=Mus musculus OX=10090 GN=Pitpnm1 PE=1 SV=1	5	6	10	715.68	719.862	702.233	685.162	690.885	724.318	659.993	670.463	688.305	730.832	710.456	676.81	712.552	699.911	672.819	705.679	1.05905	0.132172	0.252588
Q99K51	Plastin-3 OS=Mus musculus OX=10090 GN=Pls3 PE=1 SV=3	46	48	49	12301.4	12667.5	13114.9	13498.9	12896.2	13311.3	13431	13709.8	13279.9	13175.7	13133.5	12700.9	12690.3	13233.1	13472.4	13001.5	1.06163	0.0705636	0.169759
P27046	Alpha-mannosidase 2 OS=Mus musculus OX=10090 GN=Man2a1 PE=1 SV=2	7	6	5	854.621	806.721	816.924	743.856	856.301	837.532	818.002	827.013	860.945	894.681	821.125	795.759	825.834	811.034	835.117	836.154	1.03097	0.882182	0.908363
Q9Z2W0	Aspartyl aminopeptidase OS=Mus musculus OX=10090 GN=Dnpep PE=1 SV=2	18	19	17	3221.96	3255.59	3254.16	3234.04	3175.77	3225.92	3202.69	3305.9	3259.29	3177.49	3098.91	3096.81	3243.86	3211.81	3255.68	3124.18	1.04209	0.0127187	0.0554698
Q8K3G9	DCC-interacting protein 13-beta OS=Mus musculus OX=10090 GN=Appl2 PE=1 SV=1	4	8	6	482.789	467.085	474.768	440.903	421.53	472.616	439.24	439.316	440.67	460.817	495.818	435.695	474.838	444.522	439.741	463.459	1.07981	0.195453	0.32908
Q9D0F3	Protein ERGIC-53 OS=Mus musculus OX=10090 GN=Lman1 PE=1 SV=1	9	8	15	2012.63	2045.8	1989.58	1974.81	2060.35	2042.22	2096.67	1965.84	2118.04	2070.78	2082.89	2005.05	2015.87	2025.46	2059.07	2052.62	1.02143	0.720149	0.785739
Q8R5L1	Complement component 1 Q subcomponent-binding protein, mitochondrial OS=Mus musculus OX=10090 GN=C1qbp PE=1 SV=1	8	11	9	2488.4	2612.32	2381.7	2490.58	2379.29	2420.82	2573.28	2376.44	2600.13	2312.87	2497.09	2462.49	2492.36	2429.8	2514.6	2422.81	1.03788	0.62956	0.712925
D3Z2J4	AKT-interacting protein OS=Mus musculus OX=10090 GN=Aktip PE=1 SV=2	2	3	4	194.235	175.017	198.177	180.425	163.549	171.614	160.815	183.029	178.347	193.112	206.992	180.451	188.866	171.724	173.795	193.215	1.12514	0.127227	0.247906
Q8BMS9	Ras association domain-containing protein 2 OS=Mus musculus OX=10090 GN=Rassf2 PE=1 SV=1	6	4	7	740.011	688.874	673.744	748.681	710.78	736.374	693.429	744.855	766.493	667.043	704.655	672.553	700.311	731.773	734.278	681.217	1.07789	0.147187	0.272176
P61971	Nuclear transport factor 2 OS=Mus musculus OX=10090 GN=Nutf2 PE=1 SV=1	10	9	9	2507.19	2577.67	2613.65	2589.67	2647.63	2604.9	2803.09	2647.75	2720.86	2587.93	2614.85	2548.47	2565.79	2613.95	2723.16	2583.61	1.06134	0.0245079	0.085668
Q8BX09	Retinoblastoma-binding protein 5 OS=Mus musculus OX=10090 GN=Rbbp5 PE=1 SV=2	1	1	3	300.995	278.48	272.306	313.048	290.287	311.647	297.895	326.309	331.328	280.727	297.589	277.384	283.664	304.813	318.163	285.098	1.12162	0.0531689	0.142392
Q8VDP6	CDP-diacylglycerol--inositol 3-phosphatidyltransferase OS=Mus musculus OX=10090 GN=Cdipt PE=1 SV=1	1	1	1	135.208	131.337	137.568	110.825	120.03	125.534	141.774	127.653	122.899	119.969	128.757	121.775	134.68	118.639	130.534	123.443	1.1352	0.0749982	0.176327
Q8CDM8	Protein FAM160B1 OS=Mus musculus OX=10090 GN=Fam160b1 PE=1 SV=2	1	4	4	149.162	152.305	153.152	150.78	158.845	150.482	161.549	145.974	166.391	145.406	149.773	136.872	151.53	153.321	157.726	143.916	1.09596	0.16419	0.293872
Q8BTU1	Cilia- and flagella-associated protein 20 OS=Mus musculus OX=10090 GN=Cfap20 PE=1 SV=1	4	4	2	203.321	228.015	246.474	212.906	221.086	201	211.824	202.941	222.246	268.336	244.345	226.667	225.236	211.503	212.191	245.861	1.16245	0.104938	0.219238
Q9DB16	Calcium-binding protein 39-like OS=Mus musculus OX=10090 GN=Cab39l PE=1 SV=3	2	4	4	461.173	469.018	454.041	428.996	441.663	465.001	476.114	487.491	469.739	460.785	428.896	438.287	461.37	444.972	477.725	442.456	1.07971	0.0466442	0.130749
Q3UVG3	Protein FAM91A1 OS=Mus musculus OX=10090 GN=Fam91a1 PE=1 SV=1	6	6	4	348.291	346.594	335.729	381.257	356.217	363.37	357.553	356.789	396.419	330.678	358.179	322.261	343.493	366.798	369.801	336.696	1.09832	0.0845688	0.191548
Q8R2K1	Fucose mutarotase OS=Mus musculus OX=10090 GN=Fuom PE=1 SV=1	1	1	2	62.2946	77.5269	65.7186	62.21	63.9191	60.8076	60.0692	63.449	61.3441	71.7919	51.4707	68.4954	68.2125	62.2992	61.6051	63.2556	1.10725	0.666965	0.742438
Q60855	Receptor-interacting serine/threonine-protein kinase 1 OS=Mus musculus OX=10090 GN=Ripk1 PE=1 SV=1	8	5	5	840.613	910.969	852.5	866.396	850.218	922.153	865.917	889.602	914.275	892.833	814.969	776.829	867.491	879.056	889.712	826.822	1.07606	0.333728	0.470696
Q9CQY5	Magnesium transporter protein 1 OS=Mus musculus OX=10090 GN=Magt1 PE=1 SV=1	1	2		246.165	246.224		241.777	241.22		251.747	248.099		255.621	259.767		246.194	241.498	249.916	257.686	1.06703	0.00467868	0.0300142
Q9JIY5	Serine protease HTRA2, mitochondrial OS=Mus musculus OX=10090 GN=Htra2 PE=1 SV=2	3	2	3	273.409	271.548	263.648	273.779	256.642	251.531	249.554	268.431	274.634	255.918	256.038	262.846	269.502	260.479	263.988	258.247	1.04358	0.519706	0.627559
P52633	Signal transducer and transcription activator 6 OS=Mus musculus OX=10090 GN=Stat6 PE=1 SV=2	3	4	4	496.176	485.723	471.854	495.229	512.901	475.923	480.846	468.794	501.703	483.373	488.205	506.144	484.482	494.454	483.591	492.477	1.02246	0.755578	0.813195
P59048	p53 and DNA damage-regulated protein 1 OS=Mus musculus OX=10090 GN=Pdrg1 PE=2 SV=1	1	1	1	140.06	130.13	152.263	146.563	166.733	161.903	157.557	142.102	140.354	136.989	142.204	126.65	140.528	158.162	146.472	135.125	1.17049	0.0964722	0.209141
Q8R3C0	Mini-chromosome maintenance complex-binding protein OS=Mus musculus OX=10090 GN=Mcmbp PE=1 SV=1	4	7	5	604.648	636.925	619.915	606.208	591.907	607.7	601.473	671.121	645.614	667.249	579.626	606.349	620.356	601.896	638.749	616.67	1.06123	0.536077	0.64072
Q8BYH7	TBC1 domain family member 17 OS=Mus musculus OX=10090 GN=Tbc1d17 PE=1 SV=2	3	3	6	437.548	441.935	452.31	433.062	416.734	418.309	420.295	422.736	417.979	443.57	453.07	445.877	443.888	422.638	420.332	447.488	1.06461	0.00144342	0.0146319
Q922R5	Serine/threonine-protein phosphatase 4 regulatory subunit 3B OS=Mus musculus OX=10090 GN=Ppp4r3b PE=1 SV=2	4	2	1	98.3037	99.1224	89.9439	94.7709	102.311	97.2542	86.6952	85.6245	104.199	98.5257	91.2378	86.8985	95.6983	98.0622	91.7949	92.097	1.06828	0.638474	0.719936
Q9CWM4	Prefoldin subunit 1 OS=Mus musculus OX=10090 GN=Pfdn1 PE=1 SV=1	1	2	1	323.783	339.016	332.636	367.657	355.435	348.988	342.98	336.991	359.014	326.894	329.873	320.676	331.753	357.277	346.205	325.792	1.09664	0.00770557	0.0405538
Q3TX08	tRNA (guanine(26)-N(2))-dimethyltransferase OS=Mus musculus OX=10090 GN=Trmt1 PE=1 SV=2	3	5	7	454.215	447.213	469.304	440.996	450.836	409.105	433.122	443.762	422.978	457.068	443.59	484.014	456.818	433.274	433.204	461.254	1.06475	0.147076	0.272176
Q99M71	Mammalian ependymin-related protein 1 OS=Mus musculus OX=10090 GN=Epdr1 PE=1 SV=1	2	4	3	324.794	327.292	294.807	303.427	247.201	351.13	299.219	357.402	302.939	363.745	359.291	342.309	315.278	297.526	318.787	354.994	1.19315	0.302795	0.440737
Q6PHN9	Ras-related protein Rab-35 OS=Mus musculus OX=10090 GN=Rab35 PE=1 SV=1	3	4	3	840.259	734.888	776.202	811.907	866.579	836.493	794.716	882.257	898.244	787.502	750.659	723.444	782.593	838.029	857.171	753.413	1.13772	0.0639102	0.160426
Q9QXG4	Acetyl-coenzyme A synthetase, cytoplasmic OS=Mus musculus OX=10090 GN=Acss2 PE=1 SV=2	9	8	10	1424.91	1530.17	1434.14	1481.92	1369.91	1467.12	1512.44	1519.26	1489.35	1425.91	1425.84	1454.57	1462.31	1438.78	1506.96	1435.38	1.04987	0.250859	0.390374
Q8K1N1	Calcium-independent phospholipase A2-gamma OS=Mus musculus OX=10090 GN=Pnpla8 PE=1 SV=1	1	2		94.7459	77.9118		56.6565	68.1651		74.5589	70.7385		82.917	92.0629		85.9175	62.145	72.6236	87.3704	1.40591	0.0828254	0.188602
P62482	Voltage-gated potassium channel subunit beta-2 OS=Mus musculus OX=10090 GN=Kcnab2 PE=1 SV=1	2	3	3	94.9256	91.8974	93.7674	83.6973	88.7604	97.9936	103.159	109.679	103.395	105.101	96.5461	91.7265	93.5218	89.9586	105.368	97.6365	1.1713	0.0418679	0.12113
Q4PJX1	Protein odr-4 homolog OS=Mus musculus OX=10090 GN=Odr4 PE=1 SV=2	1	1	1	268.595	273.735	240.755	256.489	260.687	263.129	250.169	250.107	261.058	268.353	259.076	278.663	260.616	260.087	253.726	268.578	1.05853	0.464354	0.582027
P49718	DNA replication licensing factor MCM5 OS=Mus musculus OX=10090 GN=Mcm5 PE=1 SV=1	32	48	43	9379.22	9167.59	9122.33	9303.17	9250.33	9616.49	9506.92	9571.18	9609.04	9709.94	9910.16	9551.39	9222.37	9388.62	9562.29	9722.72	1.05425	0.0184928	0.0715951
Q9D0V7	Receptor-binding cancer antigen expressed on SiSo cells OS=Mus musculus OX=10090 GN=Ebag9 PE=1 SV=2	2	1	3	154.23	141.255	145.486	152.6	148.723	144.121	140.531	149.808	164.268	158.08	165.656	151.566	146.892	148.441	151.223	158.329	1.07786	0.368675	0.50396
Q923G2	DNA-directed RNA polymerases I, II, and III subunit RPABC3 OS=Mus musculus OX=10090 GN=Polr2h PE=1 SV=3	2	2	4	335.577	388.935	364.003	346.394	329.382	356.606	384.341	366.093	347.869	376.088	357.99	373.923	362.18	343.943	365.798	369.245	1.07356	0.379011	0.509994
Q8K4M5	COMM domain-containing protein 1 OS=Mus musculus OX=10090 GN=Commd1 PE=1 SV=2	4	2	3	124.478	114.701	122.48	113.257	130.661	130.47	106.372	111.603	110.689	125	112.142	105.467	120.478	124.521	109.531	113.919	1.13685	0.148509	0.273972
Q8BYA0	Tubulin-specific chaperone D OS=Mus musculus OX=10090 GN=Tbcd PE=1 SV=1	14	11	14	1473.08	1465.04	1436.45	1429.07	1397.86	1422.54	1383.1	1433.33	1404.9	1418.23	1407.24	1439.57	1458.11	1416.43	1406.96	1421.62	1.03635	0.0573111	0.14949
Q7TSC1	Protein PRRC2A OS=Mus musculus OX=10090 GN=Prrc2a PE=1 SV=1	4	5	5	542.318	490.808	514.4	519.302	534.185	522.608	541.675	576.441	555.073	530.401	532.262	541.616	515.413	525.326	557.547	534.737	1.08175	0.0681484	0.16634
O54950	5'-AMP-activated protein kinase subunit gamma-1 OS=Mus musculus OX=10090 GN=Prkag1 PE=1 SV=2	4	9	7	1195.01	1202.16	1158.1	1288.36	1274.42	1264.39	1226.85	1263.11	1345.04	1165.18	1135.71	1107.87	1184.93	1275.68	1277.39	1136.02	1.12445	0.00247905	0.019986
Q9WTP6	Adenylate kinase 2, mitochondrial OS=Mus musculus OX=10090 GN=Ak2 PE=1 SV=5	12	13	12	4272.71	4560.58	4669.75	4770.61	4665.51	4807.77	5104.51	5022.54	4838.05	4521.7	4420.91	4353.97	4497.86	4747.58	4987.11	4431.66	1.12534	0.00435984	0.0286015
Q6P9Q6	FK506-binding protein 15 OS=Mus musculus OX=10090 GN=Fkbp15 PE=1 SV=2	5	8	6	572.094	499.928	543.13	548.853	545.383	566.373	582.918	615.814	574.813	522.728	565.468	542.277	537.559	553.46	590.919	543.21	1.09926	0.113298	0.229928
Q9CR26	Vacuolar protein sorting-associated protein VTA1 homolog OS=Mus musculus OX=10090 GN=Vta1 PE=1 SV=1	3	4	5	768.187	780.264	749.52	725.399	688.462	761.932	709.545	730.224	719.321	736.988	741.169	709.345	765.886	724.643	719.647	729.03	1.06425	0.127866	0.248367
Q8R1V4	Transmembrane emp24 domain-containing protein 4 OS=Mus musculus OX=10090 GN=Tmed4 PE=1 SV=1	3	1	3	399.972	376.701	402.773	348.678	354.315	361.25	358.007	346.824	342.222	391.577	420.395	391.991	392.972	354.711	348.955	401.098	1.14942	0.00107668	0.0123804
P16254	Signal recognition particle 14 kDa protein OS=Mus musculus OX=10090 GN=Srp14 PE=1 SV=1	2	1	1	140.722	125.035	140.664	159.713	150.642	137.581	128.292	150.12	148.079	133.315	136.246	135.72	135.267	149.033	141.811	135.088	1.10323	0.298919	0.436044
Q9CZ15	DNA replication complex GINS protein PSF1 OS=Mus musculus OX=10090 GN=Gins1 PE=1 SV=1	3	4	3	748.041	799.165	814.732	768.521	750.229	795.908	803.746	818.614	773.055	841.611	793.91	778.223	786.79	771.325	798.245	804.135	1.04254	0.552829	0.653901
Q3ULJ0	Glycerol-3-phosphate dehydrogenase 1-like protein OS=Mus musculus OX=10090 GN=Gpd1l PE=1 SV=2	4	7	8	1450.52	1464.15	1443.72	1408.91	1466.84	1548.88	1505.64	1511.96	1455.05	1434.02	1356.13	1351.44	1452.77	1473.76	1490.66	1380.02	1.08018	0.0654242	0.162571
P42232	Signal transducer and activator of transcription 5B OS=Mus musculus OX=10090 GN=Stat5b PE=1 SV=1	2	4	3	119.108	117.928	132.125	132.169	121.964	128.932	117.826	145.048	138.237	150.198	134.361	120.008	122.889	127.617	133.186	134.292	1.09279	0.591922	0.68543
P35276	Ras-related protein Rab-3D OS=Mus musculus OX=10090 GN=Rab3d PE=1 SV=1	5	4	1	183.281	184.85	219.858	193.165	186.566	158.133	182.782	208.062	184.045	202.779	182.53	199.973	195.296	178.619	191.286	194.884	1.09337	0.584031	0.678809
Q64010	Adapter molecule crk OS=Mus musculus OX=10090 GN=Crk PE=1 SV=1	11	16	12	2423.08	2472.34	2526.32	2695.84	2574.9	2659.08	2756.34	2683.21	2566.32	2371.67	2516.48	2495.21	2473.55	2642.78	2667.47	2460.28	1.08421	0.0149066	0.0615718
Q61025	Intraflagellar transport protein 20 homolog OS=Mus musculus OX=10090 GN=Ift20 PE=1 SV=1	1	1	1	37.0959	35.4449	40.9045	33.5463	41.7577	34.4679	33.1782	34.7188	28.8217	36.2963	28.1953	35.9225	37.7471	36.4137	32.14	33.2508	1.17446	0.31712	0.455222
Q9D051	Pyruvate dehydrogenase E1 component subunit beta, mitochondrial OS=Mus musculus OX=10090 GN=Pdhb PE=1 SV=1	16	19	23	4566.69	4482.29	4629.65	4522.06	4582.43	4314.57	4424.8	4380.16	4232.49	4379.63	4448.3	4716.47	4559.14	4471.53	4345.03	4512.49	1.04928	0.277687	0.414941
Q3TAP4	AP-5 complex subunit beta-1 OS=Mus musculus OX=10090 GN=Ap5b1 PE=1 SV=1	2		1	165.608		167.65	155.943		155.035	144.363		169.117	172.101		146.214	166.625	155.488	156.251	158.63	1.07163	0.819278	0.860039
O70566	Protein diaphanous homolog 2 OS=Mus musculus OX=10090 GN=Diaph2 PE=1 SV=2	3	3	5	536.344	509.005	465.16	553.476	519.78	611.385	508.938	516.289	505.082	452.918	506.602	470.049	502.639	560.288	510.082	476.003	1.17707	0.0649852	0.161872
P62192	26S proteasome regulatory subunit 4 OS=Mus musculus OX=10090 GN=Psmc1 PE=1 SV=1	26	21	19	4694.16	4770.46	4693.27	4694.61	4601.08	4520.47	4594.86	4489.69	4539.01	4589.88	4712.26	4820.75	4719.16	4604.84	4540.99	4706.69	1.03924	0.0728681	0.17308
Q8C3X8	Lipase maturation factor 2 OS=Mus musculus OX=10090 GN=Lmf2 PE=1 SV=1	2	4	4	387.775	395.772	393.621	447.287	419.214	384.232	418.127	397.428	379.724	362.86	403.636	458.472	392.375	416.107	398.118	406.456	1.06048	0.785796	0.837142
Q2TBE6	Phosphatidylinositol 4-kinase type 2-alpha OS=Mus musculus OX=10090 GN=Pi4k2a PE=1 SV=1	3	5	5	354.297	391.994	362.054	403.192	421.881	398.401	417.473	399.882	421.279	421.277	382.482	414.505	369.097	407.7	412.772	405.729	1.11833	0.0411882	0.119822
Q91WK1	SPRY domain-containing protein 4 OS=Mus musculus OX=10090 GN=Spryd4 PE=1 SV=1	1	2	2	171.6	113.306	137.159	113.742	151.424	129.939	120.854	133.452	130.12	129.374	137.389	138.352	138.675	130.803	128.03	134.977	1.08315	0.88103	0.907376
P02802	Metallothionein-1 OS=Mus musculus OX=10090 GN=Mt1 PE=1 SV=1	1	2	3		27.7395	23.7507	86.1977	71.7451	62.002		45.3945	71.3232	92.1707	35.4893	23.2925	25.6677	72.6493	56.9006	42.3938	2.83038	0.165656	0.295931
Q8R5A6	TBC1 domain family member 22A OS=Mus musculus OX=10090 GN=Tbc1d22a PE=1 SV=3	2	1	2	93.0691	104.839	98.2561	95.0048	79.4523	95.914	109.881	87.3828	96.9443	85.3624	111.643	92.2024	98.6043	89.7935	97.6389	95.7811	1.09812	0.723284	0.787779
P58281	Dynamin-like 120 kDa protein, mitochondrial OS=Mus musculus OX=10090 GN=Opa1 PE=1 SV=1	23	25	23	3653.59	3538.51	3830.6	3750.69	3637.52	3761.69	3914.88	3886.44	3704.11	3474.21	3730.91	3496.96	3672.28	3716.21	3833.99	3565.5	1.0753	0.136959	0.259095
Q99LG2	Transportin-2 OS=Mus musculus OX=10090 GN=Tnpo2 PE=1 SV=1	13	11	12	957.465	1024.75	954.569	1018.63	981.23	958.272	942.394	938.239	946.718	943.365	917.633	1002.29	978.399	985.731	942.444	953.779	1.04593	0.383205	0.514013
Q9D0J8	Parathymosin OS=Mus musculus OX=10090 GN=Ptms PE=1 SV=3	5	6	7	3645.88	4046.17	3782.13	3983.94	3550.88	4124.19	4055.19	4039.9	3958.13	3921.61	3969.66	3742.16	3821.15	3878.49	4017.52	3876.56	1.05139	0.667138	0.742438
A6X8Z5	Rho GTPase-activating protein 31 OS=Mus musculus OX=10090 GN=Arhgap31 PE=1 SV=1	2	1	2	52.4465	48.2467	50.4501	48.2122	56.7977	44.7661	44.2456	48.2183	53.2735	57.1017	48.7433	53.5162	50.3518	49.6759	48.4393	53.009	1.09434	0.663042	0.740154
Q61655	ATP-dependent RNA helicase DDX19A OS=Mus musculus OX=10090 GN=Ddx19a PE=1 SV=2	19	13	19	4991.06	4969.27	4759.8	4911.58	4658.93	5004.03	4663.67	4744.67	4915.5	4728.34	4921.78	4615.32	4905.59	4855.97	4773.47	4753.47	1.032	0.588549	0.683044
Q99PM3	Transcription initiation factor IIA subunit 1 OS=Mus musculus OX=10090 GN=Gtf2a1 PE=1 SV=2	2	1	1	89.2667	84.0658	80.041	77.4854	78.2468	86.7575	86.8886	88.208	83.8382	82.9692	86.0893	85.9732	84.3737	80.7231	86.292	84.9982	1.06899	0.361188	0.496623
O35218	Cleavage and polyadenylation specificity factor subunit 2 OS=Mus musculus OX=10090 GN=Cpsf2 PE=1 SV=1	2	2	2	172.226	169.055	201.132	199.854	181.937	165.239	156.972	182.973	186.617	197.93	193.017	173.993	180.248	181.795	175.007	188.024	1.07438	0.804735	0.851837
Q8JZZ7	Adhesion G protein-coupled receptor L2 OS=Mus musculus OX=10090 GN=Adgrl2 PE=1 SV=3	4	3	3	262.413	249.43	248.826	248.297	252.811	247.805	215.199	224.877	242.904	265.378	264.169	251.752	253.48	249.628	227.374	260.359	1.14507	0.0108119	0.0495294
Q9R112	Sulfide:quinone oxidoreductase, mitochondrial OS=Mus musculus OX=10090 GN=Sqor PE=1 SV=3	6	10	8	1512.41	1471.67	1467.4	1467.95	1437.92	1503.46	1471.88	1454.75	1508.45	1449.09	1536.98	1422.02	1483.69	1469.53	1478.19	1468.55	1.0103	0.955153	0.963588
P20664	DNA primase small subunit OS=Mus musculus OX=10090 GN=Prim1 PE=1 SV=1	7	8	11	663.418	664.4	633.015	692.141	713.975	747.653	644.473	679.065	716.833	711.403	653.994	613.933	653.447	717.562	679.482	658.573	1.09812	0.185339	0.318056
P53986	Monocarboxylate transporter 1 OS=Mus musculus OX=10090 GN=Slc16a1 PE=1 SV=1	1	2	3	477.003	470.289	513.217	434.297	460.702	379.935	451.72	448.891	364.067	425.363	408.502	531.165	486.477	423.616	419.499	451.92	1.15966	0.370543	0.504656
Q91W69	Epsin-3 OS=Mus musculus OX=10090 GN=Epn3 PE=1 SV=1			2			310.7			318.148			336.353			317.531	310.7	318.148	336.353	317.531	1.08257
Q3UHX2	28 kDa heat- and acid-stable phosphoprotein OS=Mus musculus OX=10090 GN=Pdap1 PE=1 SV=1	4	8	12	1828.83	1806.94	1727.68	1686.24	1782.66	1686.1	1906.93	1868.91	1807.75	1741.61	1705.09	1942.09	1787.28	1717.74	1860.75	1793.31	1.08325	0.243418	0.383767
Q9CPT3	N-acylneuraminate-9-phosphatase OS=Mus musculus OX=10090 GN=Nanp PE=1 SV=1	2	3	3	152.814	156.893	153.191	135.648	153.258	144.443	153.607	136.094	133.755	158.123	153.948	168.803	154.289	144.271	140.881	160.171	1.13692	0.0674083	0.165396
Q9WVQ5	Methylthioribulose-1-phosphate dehydratase OS=Mus musculus OX=10090 GN=Apip PE=1 SV=1	10	8	7	745.87	758.626	788.184	791.739	769.893	787.994	750.729	802.577	769.42	767.806	725.048	710.546	764.022	783.15	773.947	734.069	1.06686	0.13216	0.252588
Q07113	Cation-independent mannose-6-phosphate receptor OS=Mus musculus OX=10090 GN=Igf2r PE=1 SV=1	8	8	8	1818.05	1920.43	1871.56	1920.14	1799.4	1906.21	1810.02	1831.16	1821.67	1855.67	1852.89	1804.45	1869.54	1874.46	1820.93	1837.52	1.0294	0.437929	0.560453
Q99MB1	Toll-like receptor 3 OS=Mus musculus OX=10090 GN=Tlr3 PE=1 SV=2		1	2		31.8973	33.5933		35.5314	29.0012		33.6677	34.4062		27.9194	32.0151	32.7343	32.1007	34.0349	29.8972	1.1384	0.577771	0.674109
Q8BWZ3	N-alpha-acetyltransferase 25, NatB auxiliary subunit OS=Mus musculus OX=10090 GN=Naa25 PE=1 SV=1	11	14	15	1499	1542.71	1474.57	1472.06	1508.71	1485.44	1548.74	1510.98	1545.65	1502.81	1460.2	1516.94	1505.16	1488.66	1535.02	1493.12	1.03115	0.222377	0.359797
P54761	Ephrin type-B receptor 4 OS=Mus musculus OX=10090 GN=Ephb4 PE=1 SV=2	3	3		410.408	405.013		376.784	382.607		375.823	377.55		414.364	412.209		407.702	379.684	376.685	413.285	1.09716	0.000506259	0.00795744
P62245	40S ribosomal protein S15a OS=Mus musculus OX=10090 GN=Rps15a PE=1 SV=2	5	8	6	1265.57	1110.63	1060.68	1209.39	1281.38	1266.48	1232.19	1307.11	1421.25	1225.84	1233.86	1184.57	1142.39	1252.03	1317.91	1214.56	1.15365	0.104143	0.218252
Q3TLP5	Enoyl-CoA hydratase domain-containing protein 2, mitochondrial OS=Mus musculus OX=10090 GN=Echdc2 PE=1 SV=2	4	4	4	263.85	269.477	295.033	260.843	275.776	268.368	269.367	274.717	248.521	271.849	245.938	253.985	275.793	268.259	263.956	257.032	1.07299	0.413172	0.541429
Q3TPX4	Exocyst complex component 5 OS=Mus musculus OX=10090 GN=Exoc5 PE=1 SV=2	5	2	4	261.12	268.473	265.409	265.467	275.241	289.086	290.582	268.137	265.463	249.245	254.563	246.455	264.983	276.429	274.501	250.065	1.10543	0.0264336	0.0903181
Q8R3B1	1-phosphatidylinositol 4,5-bisphosphate phosphodiesterase delta-1 OS=Mus musculus OX=10090 GN=Plcd1 PE=1 SV=2	9	13	13	1406.67	1403.14	1454.43	1396.62	1363.31	1428.93	1445.96	1420.75	1424.96	1494.24	1556.3	1435.18	1421.22	1396.03	1430.52	1494.43	1.07048	0.0603675	0.155075
Q8BYW9	EGF domain-specific O-linked N-acetylglucosamine transferase OS=Mus musculus OX=10090 GN=Eogt PE=1 SV=1	1	1		64.2827	74.0494		48.0468	63.5535		65.9675	57.0885		80.247	63.8525		68.9934	55.2588	61.3676	71.5819	1.29539	0.391813	0.522269
P10711	Transcription elongation factor A protein 1 OS=Mus musculus OX=10090 GN=Tcea1 PE=1 SV=2	11	13	15	2573.7	2437.77	2639.94	2856.01	2921.67	2775.33	2888.28	3006.78	2785.25	2658.57	2610.33	2776.03	2549.07	2850.37	2892.02	2680.75	1.13454	0.00718509	0.0390429
Q9JK38	Glucosamine 6-phosphate N-acetyltransferase OS=Mus musculus OX=10090 GN=Gnpnat1 PE=1 SV=1	2	5	5	309.975	346.853	341.353	336.603	286.064	313.685	347.334	327.664	332.513	321.358	354.69	327.72	332.322	311.428	335.733	334.282	1.07804	0.413227	0.541429
Q9WVA3	Mitotic checkpoint protein BUB3 OS=Mus musculus OX=10090 GN=Bub3 PE=1 SV=2	8	6	8	2221.39	2071.68	2197.7	2025.97	2183.45	2007.58	1959.06	2047.17	2179.76	2388.88	2293.01	2210.26	2162.58	2070.86	2060.01	2296.22	1.11466	0.0573193	0.14949
Q61730	Interleukin-1 receptor accessory protein OS=Mus musculus OX=10090 GN=Il1rap PE=1 SV=1	1	3	2	221.483	214.648	218.379	234.375	201.96	193.281	191.154	207.976	218.715	215.539	237.968	232.176	218.152	209.149	205.632	228.361	1.11053	0.290287	0.427178
Q99M51	Cytoplasmic protein NCK1 OS=Mus musculus OX=10090 GN=Nck1 PE=1 SV=1	7	9	13	1553.12	1565.77	1657.87	1619.06	1677.88	1686.28	1720.31	1718.42	1638	1711.86	1642.27	1622.21	1591.58	1660.8	1691.8	1658.34	1.06297	0.144295	0.26874
O88879	Apoptotic protease-activating factor 1 OS=Mus musculus OX=10090 GN=Apaf1 PE=1 SV=3	3	1	6	372.119	361.793	344.243	386.788	374.658	409.099	377.795	340.377	384.906	350.305	410.178	348.76	359.2	389.923	367.161	368.679	1.08553	0.486311	0.601023
Q8C569	Protein FAM118B OS=Mus musculus OX=10090 GN=Fam118b PE=1 SV=1	3	5	1	271.034	272.766	248.791	275.402	275.155	269.591	287.098	274.87	281.676	247.739	258.482	281.215	263.967	273.37	281.17	262.112	1.07271	0.240345	0.380442
Q99MN9	Propionyl-CoA carboxylase beta chain, mitochondrial OS=Mus musculus OX=10090 GN=Pccb PE=1 SV=2	8	10	6	1055.41	1047.02	966.347	943.807	989.101	1028.15	1080.71	1016.72	992.891	991.272	1018.35	1083.81	1022.12	986.415	1029.45	1030.42	1.04461	0.620656	0.70579
Q6ZWM4	U6 snRNA-associated Sm-like protein LSm8 OS=Mus musculus OX=10090 GN=Lsm8 PE=1 SV=3	5	5	4	416.624	419.761	427.625	415.292	396.503	392.724	410.128	414.584	428.332	414.244	425.44	407.608	421.311	401.386	417.61	415.699	1.04964	0.120781	0.241047
Q78ZA7	Nucleosome assembly protein 1-like 4 OS=Mus musculus OX=10090 GN=Nap1l4 PE=1 SV=1	14	14	13	1655.97	1549.44	1517.81	1600.26	1593.53	1688.82	1615.53	1746.07	1768.12	1565.04	1547.75	1462.04	1573.31	1626.97	1708.56	1524.27	1.1209	0.0469907	0.131406
P63163	Small nuclear ribonucleoprotein-associated protein N OS=Mus musculus OX=10090 GN=Snrpn PE=1 SV=1	4	1	2	223.245	270.183	211.366	205.12	184.911	211.97	228.404	211.376	230.702	218.357	208.655	221.087	233.61	200.331	223.325	215.967	1.16612	0.189457	0.323167
Q9Z0L0	Trophoblast glycoprotein OS=Mus musculus OX=10090 GN=Tpbg PE=1 SV=3		2			193.906			206.914			189.024			186.148		193.906	206.914	189.024	186.148	1.11156
Q68FE6	Rho family-interacting cell polarization regulator 1 OS=Mus musculus OX=10090 GN=Ripor1 PE=1 SV=2	7	4	7	656.111	644.232	655.884	659.955	620.717	667.964	622.129	644.669	640.387	649.868	678.444	623.829	652.052	649.213	635.653	650.332	1.0258	0.733578	0.794837
Q64516	Glycerol kinase OS=Mus musculus OX=10090 GN=Gk PE=1 SV=2	1	4	2	567.886	646.405	625.459	656.939	597.455	551.974	628.929	552.286	590.077	578.666	636.274	664.91	612.334	600.597	589.601	625.573	1.06101	0.781425	0.833567
Q3V3R4	Integrin alpha-1 OS=Mus musculus OX=10090 GN=Itga1 PE=1 SV=2	3	7	10	770.035	876.656	857.317	986.641	891.878	980.704	940.035	941.035	938.76	886.387	873.529	806.317	833.35	952.067	939.943	854.677	1.14246	0.0296708	0.096312
Q3TDN2	FAS-associated factor 2 OS=Mus musculus OX=10090 GN=Faf2 PE=1 SV=2	4	5	6	1060.51	1080.18	1019.9	1108.63	1132.24	1111.85	1090.25	1061.16	1150.45	1025.91	1011.72	1003.1	1053.23	1117.53	1099.99	1013.53	1.10261	0.00767893	0.0405433
Q3TZZ7	Extended synaptotagmin-2 OS=Mus musculus OX=10090 GN=Esyt2 PE=1 SV=1	15	16	16	1601.69	1596.43	1585.64	1652.92	1622.28	1571.85	1571.85	1570.79	1567.83	1536.39	1573.35	1637.53	1594.57	1615.34	1570.15	1581.88	1.02877	0.428593	0.552886
Q9WUK2	Eukaryotic translation initiation factor 4H OS=Mus musculus OX=10090 GN=Eif4h PE=1 SV=3	6	4	6	1275.3	1230.67	1319.85	1223.84	1234.75	1194.52	1198.57	1229.82	1194.82	1422.08	1424.54	1410.59	1274.75	1217.58	1207.64	1419.06	1.17507	4.99859e-05	0.00207198
Q8BPU7	Engulfment and cell motility protein 1 OS=Mus musculus OX=10090 GN=Elmo1 PE=1 SV=2	8	9	11	1331.9	1217.67	1259.24	1252.55	1339.66	1300.32	1222.62	1310.93	1304.07	1327.61	1266.42	1271.04	1268.73	1297.02	1278.57	1288.06	1.0223	0.892768	0.916643
P61089	Ubiquitin-conjugating enzyme E2 N OS=Mus musculus OX=10090 GN=Ube2n PE=1 SV=1	10	13	16	3050.49	3154.8	3394.34	3472.79	3231.87	3248.8	3385.89	3402.5	3265.21	3370.81	3490.82	3371.63	3196.68	3316.03	3350.63	3410.63	1.06693	0.257828	0.397165
Q792Y9	MCG140783 OS=Mus musculus OX=10090 GN=Gm5771 PE=1 SV=1	1	1	2	712.945	808.172	760.346	812.604	735.217	837.75	890.245	891.017	903.765	813.677	795.063	727.609	759.493	793.968	894.988	777.888	1.1784	0.0269112	0.0914082
Q7TPR4	Alpha-actinin-1 OS=Mus musculus OX=10090 GN=Actn1 PE=1 SV=1	74	54	54	16649.6	15949.3	15999.7	14996.7	15836.6	16069.9	16380	16422.7	16206	16355.6	16173.3	16106.3	16196.4	15627.5	16336	16211.4	1.04533	0.148977	0.274619
Q8BUK6	Protein Hook homolog 3 OS=Mus musculus OX=10090 GN=Hook3 PE=1 SV=2	10	10	14	1633.8	1658.91	1617.97	1693.08	1677.32	1692.44	1652.65	1654.24	1678.42	1622.6	1611.66	1613.3	1636.81	1687.6	1661.73	1615.84	1.04441	0.00109477	0.0124766
Q6IRU2	Tropomyosin alpha-4 chain OS=Mus musculus OX=10090 GN=Tpm4 PE=1 SV=3	19	21	24	7073.08	7767.89	6788.43	8273.46	6977.9	8361.32	8070.49	7411.17	7942.35	6725.87	7985.93	7050.79	7198.25	7844.44	7802.71	7234.98	1.08977	0.422796	0.548733
Q99JY9	Actin-related protein 3 OS=Mus musculus OX=10090 GN=Actr3 PE=1 SV=3	14	22	22	5087.75	4913.03	5116.97	5364.9	5494.87	5254.62	5854.41	5774.18	5900.51	4939.92	5064.89	4974.87	5038.44	5370.57	5842.8	4992.95	1.17021	1.61656e-05	0.00116492
Q99MR8	Methylcrotonoyl-CoA carboxylase subunit alpha, mitochondrial OS=Mus musculus OX=10090 GN=Mccc1 PE=1 SV=2	4	3	5	460.94	464.982	471.758	460.606	482.572	468.817	484.92	466.127	479.366	490.049	482.835	476.574	465.872	470.578	476.739	483.121	1.03703	0.153473	0.280479
Q69ZS7	HBS1-like protein OS=Mus musculus OX=10090 GN=Hbs1l PE=1 SV=2	8	4	4	577.711	551.284	568.633	558.369	552.764	564.437	570.856	603.095	587.11	570.097	569.89	556.854	565.769	558.503	586.873	565.579	1.0508	0.0737092	0.174283
P26231	Catenin alpha-1 OS=Mus musculus OX=10090 GN=Ctnna1 PE=1 SV=1	25	35	35	3605.58	3544.04	3658.83	3555.59	3537.46	3324.61	3071.73	3052.39	3144.96	3434.2	3533.2	3538.71	3602.51	3470.95	3089.44	3501.7	1.16607	0.000197685	0.00465305
P51174	Long-chain specific acyl-CoA dehydrogenase, mitochondrial OS=Mus musculus OX=10090 GN=Acadl PE=1 SV=2	15	14	21	4177.26	4283.16	4307.82	4281.38	4048.86	4119.71	4129.72	4201.69	4065.07	4300.46	4355.12	4396.23	4255.7	4148.85	4131.78	4350.43	1.05292	0.0359021	0.109412
Q3UJB9	Enhancer of mRNA-decapping protein 4 OS=Mus musculus OX=10090 GN=Edc4 PE=1 SV=2	26	27	31	3124.49	2857.85	2953.48	2783.2	2998.01	2770.27	2628.36	2800.81	2951.53	3086.22	2965.6	2946.98	2976.58	2848.61	2790.43	2998.97	1.07473	0.224466	0.362051
Q9WUP7	Ubiquitin carboxyl-terminal hydrolase isozyme L5 OS=Mus musculus OX=10090 GN=Uchl5 PE=1 SV=2	1	1	13	238.918	240.775	242.367	262.987	239.429	242.38	216.054	247.884	238.408	236.578	226.449	231.382	240.683	248.048	233.728	231.433	1.07179	0.301282	0.438808
Q61102	ATP-binding cassette sub-family B member 7, mitochondrial OS=Mus musculus OX=10090 GN=Abcb7 PE=1 SV=3	4	4	3	555.354	506.63	518.295	439.816	493.627	503.631	468.617	475.435	439.52	521.569	509.664	523.91	526.356	478.183	460.924	518.343	1.14196	0.029483	0.0959683
P57680	Ellis-van Creveld syndrome protein homolog OS=Mus musculus OX=10090 GN=Evc PE=1 SV=2	1	2	1	32.6519	45.1617	39.8624	40.0639	31.6283	35.9081	46.4745	32.7792	37.712	32.5559	42.177	38.2637	38.8819	35.7005	38.5861	37.4539	1.08911	0.891619	0.916066
A0A0R4J0Q9	Conserved oligomeric Golgi complex subunit 7 OS=Mus musculus OX=10090 GN=Cog7 PE=1 SV=1	3	3	4	331.27	360.57	342.195	353.837	335.082	357.525	372.783	344.14	360.111	322.565	340.663	320.624	344.468	348.674	358.82	327.828	1.09454	0.0978107	0.210545
O70299	Putative nucleotidyltransferase MAB21L1 OS=Mus musculus OX=10090 GN=Mab21l1 PE=2 SV=1	3	2	2	442.36	375.135	401.401	438.265	457.972	457.88	387.155	462.568	462.62	418.666	390.772	364.547	405.366	451.276	435.941	390.704	1.15503	0.156275	0.283498
Q9QYB1	Chloride intracellular channel protein 4 OS=Mus musculus OX=10090 GN=Clic4 PE=1 SV=3	25	29	26	6758.8	7027.74	6905.68	7145.08	6639.52	7073.35	7492.4	7379.61	7169.35	6562.45	6911.86	6810.35	6896.53	6949.01	7345.89	6759.95	1.08668	0.0341608	0.10569
Q6X893	Choline transporter-like protein 1 OS=Mus musculus OX=10090 GN=Slc44a1 PE=1 SV=3	3	6	2	285.253	257.989	259.024	277.519	295.531	290.997	264.996	286.698	278.956	288.351	275.9	287.141	267.131	287.913	276.736	283.741	1.0778	0.194776	0.328738
Q8BGC4	Prostaglandin reductase-3 OS=Mus musculus OX=10090 GN=Zadh2 PE=1 SV=1	3	1	3	244.529	243.36	248.237	211.856	210.716	213.797	256.993	226.753	202.779	224.524	257.073	273.088	245.366	212.12	227.771	250.731	1.18203	0.104136	0.218252
A0A1L1SRH8	Sentrin-specific protease 8 OS=Mus musculus OX=10090 GN=Senp8 PE=1 SV=1	1	2		180.597	220.074		233.562	206.567		225.777	222.728		220.371	210.939		199.361	219.65	224.247	215.604	1.12483	0.576302	0.672999
P59328	WD repeat and HMG-box DNA-binding protein 1 OS=Mus musculus OX=10090 GN=Wdhd1 PE=1 SV=2	7	9	12	1403.91	1352.03	1338.45	1509.85	1506.57	1455.67	1454.14	1482.7	1491.92	1293.79	1320.38	1375.64	1364.51	1490.49	1476.17	1329.5	1.12109	0.000704574	0.00951073
O70591	Prefoldin subunit 2 OS=Mus musculus OX=10090 GN=Pfdn2 PE=1 SV=2	7	7	6	3151.92	3167.31	3102.94	2918.84	2859.04	2974.97	2751.07	2833.89	2784.17	2892.59	2854.19	2852.34	3140.6	2917.23	2789.5	2866.31	1.12587	4.08206e-05	0.0018385
P63168	Dynein light chain 1, cytoplasmic OS=Mus musculus OX=10090 GN=Dynll1 PE=1 SV=1	4	8	5	606.483	559.78	606.327	493.121	576.114	528.347	525.578	551.136	519.649	637.501	575.653	608.36	590.447	531.447	531.947	606.644	1.14149	0.0325569	0.102258
Q6A065	Centrosomal protein of 170 kDa OS=Mus musculus OX=10090 GN=Cep170 PE=1 SV=2	8	13	11	1381.06	1350.26	1361.39	1197.46	1333.73	1321.05	1434.69	1408.9	1340.71	1388.66	1308.98	1378.72	1364.18	1282.57	1394.2	1358.32	1.08703	0.128321	0.248966
Q11136	Xaa-Pro dipeptidase OS=Mus musculus OX=10090 GN=Pepd PE=1 SV=3	5	7	10	1519.05	1575.38	1604.72	1614.42	1596.89	1637.84	1590.41	1697.16	1623.39	1721.64	1576.09	1579.56	1565.98	1616.3	1636.38	1624.38	1.04496	0.447554	0.568423
P56389	Cytidine deaminase OS=Mus musculus OX=10090 GN=Cda PE=1 SV=2	5	4	5	408.172	427.25	389.508	355.89	347.498	364.12	358.554	344.203	391.196	396.318	399.985	374.111	408.019	355.771	364.128	389.969	1.14686	0.0215549	0.0787408
O09159	Lysosomal alpha-mannosidase OS=Mus musculus OX=10090 GN=Man2b1 PE=1 SV=4	11	17	11	2239.43	2111.61	2224.17	2427.37	2234.26	2390.3	2257.93	2505.02	2296.75	2312.38	2386.22	2325.9	2190.98	2349.13	2350.78	2341.28	1.07293	0.160943	0.289665
Q9WTM5	RuvB-like 2 OS=Mus musculus OX=10090 GN=Ruvbl2 PE=1 SV=3	10	15	15	3586.45	3595.46	3524.78	3611.89	3445.27	3671.97	3722.49	3781.55	3751.95	3319.74	3418.29	3291.87	3568.76	3575.08	3751.92	3342.86	1.12237	0.000925472	0.0112888
Q9WUM3	Coronin-1B OS=Mus musculus OX=10090 GN=Coro1b PE=1 SV=1	7	5	9	1174.43	1088.61	1190.92	1343.03	1389.86	1325.34	1283.61	1305.9	1353.98	1303.05	1319.74	1233.87	1150.43	1352.47	1314.17	1285.01	1.17562	0.00241003	0.0197008
P99028	Cytochrome b-c1 complex subunit 6, mitochondrial OS=Mus musculus OX=10090 GN=Uqcrh PE=1 SV=2	1	2	2	182.28	187.696	184.136	186.671	176.065	179.043	178.818	170.164	183.9	166.273	180.116	166.964	184.69	180.538	177.536	171.001	1.08005	0.117064	0.235738
Q9D8C6	Mediator of RNA polymerase II transcription subunit 11 OS=Mus musculus OX=10090 GN=Med11 PE=1 SV=1	1	2	1	137.895	124.942	126.461	132.713	136.396	122.51	116.342	118.043	147.86	120.321	127.891	110.439	129.64	130.405	126.632	119.335	1.09277	0.595327	0.687673
E9QPN7	Dedicator of cytokinesis protein 6 OS=Mus musculus OX=10090 GN=Dock6 PE=1 SV=2	3	4	3	290.709	288.074	268.858	317.747	324.444	323.564	285.782	297.305	295.734	291.749	276.164	297.831	282.377	321.904	292.895	288.435	1.13998	0.00414943	0.027726
P68040	Receptor of activated protein C kinase 1 OS=Mus musculus OX=10090 GN=Rack1 PE=1 SV=3	30	27	34	10116.1	8567.37	9091.82	9478.16	10866.6	9650.27	10141	10313.4	10796	9769.87	9757.71	9967.1	9236.42	9979.75	10413.1	9831.09	1.1274	0.172595	0.304618
Q64442	Sorbitol dehydrogenase OS=Mus musculus OX=10090 GN=Sord PE=1 SV=3	9	8	10	2025.31	2050.02	2077.65	2066.16	1971.45	2093.93	2082.1	2157.55	2053.58	2095.07	2089.61	2043.47	2050.88	2043.17	2097.29	2075.92	1.02649	0.504229	0.615283
Q921C5	Protein bicaudal D homolog 2 OS=Mus musculus OX=10090 GN=Bicd2 PE=1 SV=1	5	6	6	933.345	993.496	921.267	960.035	924.388	948.243	875.928	887.02	940.823	923.13	887.534	882.105	948.851	944.105	900.817	897.407	1.05732	0.123324	0.243426
A0A075F5C6	Heat shock factor protein 1 OS=Mus musculus OX=10090 GN=Hsf1 PE=1 SV=1	1	1	1	353.031	335.493	346.481	347.052	349.237	359.363	324.803	359.618	329.308	344.983	325.521	334.717	344.926	351.843	337.563	334.979	1.05034	0.368799	0.50396
P48428	Tubulin-specific chaperone A OS=Mus musculus OX=10090 GN=Tbca PE=1 SV=3	3	6	6	1295.08	1368.58	1312.26	1242.06	1167.4	1308.18	1265.42	1335.83	1271.73	1322.33	1253.07	1232.72	1324.94	1237.88	1290.61	1268.8	1.07033	0.274548	0.412667
Q3U9N4	Granulins OS=Mus musculus OX=10090 GN=Grn PE=1 SV=1		2	1		90.8014	96.3802		83.906	83.4986		63.6955	70.0388		95.1349	83.6201	93.5492	83.7021	66.7919	89.1919	1.40061	0.0176945	0.0695487
P97314	Cysteine and glycine-rich protein 2 OS=Mus musculus OX=10090 GN=Csrp2 PE=1 SV=3	7	4	6	832.836	651.315	758.178	738.889	848.539	760.808	742.808	923.31	846.19	843.859	735.228	793.215	743.659	781.343	834.124	789.516	1.12165	0.572582	0.670829
Q3TDQ1	Dolichyl-diphosphooligosaccharide--protein glycosyltransferase subunit STT3B OS=Mus musculus OX=10090 GN=Stt3b PE=1 SV=2	1	4	2	465.983	392.266	403.18	391.639	433.538	415.401	390.047	402.224	402.831	410.175	429.816	436.434	419.26	413.168	398.323	425.328	1.06779	0.547515	0.64975
P11688	Integrin alpha-5 OS=Mus musculus OX=10090 GN=Itga5 PE=1 SV=3	8	9	7	1224.26	1203.46	1286.47	1213	1310.93	1331.54	1311.37	1210.41	1208.95	1305.53	1329.37	1227.2	1237.56	1284.1	1242.67	1286.62	1.03964	0.58902	0.683421
Q8BVY0	Ribosomal L1 domain-containing protein 1 OS=Mus musculus OX=10090 GN=Rsl1d1 PE=1 SV=1	1		1	19.4339		23.6591	23.5048		19.3914	30.092		24.5768	29.2818		34.6852	21.4427	21.3493	27.1949	31.8692	1.49275	0.0995178	0.212365
Q6Y7W8	GRB10-interacting GYF protein 2 OS=Mus musculus OX=10090 GN=Gigyf2 PE=1 SV=2	5	6	11	752.818	666.983	724.566	734.377	811.223	738.926	761.557	755.106	759.536	757.296	772.737	783.022	713.884	760.712	758.728	770.946	1.07993	0.20056	0.334467
Q03145	Ephrin type-A receptor 2 OS=Mus musculus OX=10090 GN=Epha2 PE=1 SV=3	8	12	12	1221.83	1135.16	1172.42	1171.45	1238.61	1174.49	1155.49	1164.17	1166.52	1082.88	1093.71	1118.21	1175.93	1194.45	1162.05	1098.17	1.08768	0.018481	0.0715951
Q3TIX9	U4/U6.U5 tri-snRNP-associated protein 2 OS=Mus musculus OX=10090 GN=Usp39 PE=1 SV=2	4	1	5	248.584	279.197	245.218	236.553	211.938	228.837	244.682	229.839	249.57	241.717	250.562	247.911	257.224	225.539	241.216	246.702	1.14049	0.0709789	0.170408
Q6SKR2	HemK methyltransferase family member 2, isoform CRA_c OS=Mus musculus OX=10090 GN=N6amt1 PE=1 SV=1	2	1		141.083	138.063		133.352	128.378		132.109	122.57		134.803	152.337		139.565	130.842	127.25	143.302	1.12614	0.234457	0.374556
Q9D2Y4-2	Isoform 2 of Mixed lineage kinase domain-like protein OS=Mus musculus OX=10090 GN=Mlkl	12	12	19	3342.91	3558.46	3386.18	3456.46	3279.61	3378.35	3288.31	3280.84	3354.33	3352.68	3321.45	3321.51	3427.94	3370.7	3307.66	3331.85	1.03636	0.290355	0.427178
Q4VA93	Protein kinase C OS=Mus musculus OX=10090 GN=Prkca PE=1 SV=1	1	3	4	343.312	324.812	310.182	285.029	312.187	310.004	316.938	309.04	315.389	323.261	322.501	332.965	325.821	302.151	313.771	326.208	1.07962	0.107099	0.223054
Q80UW8	DNA-directed RNA polymerases I, II, and III subunit RPABC1 OS=Mus musculus OX=10090 GN=Polr2e PE=1 SV=1	1	3	2	165.64	135.604	139.086	172.64	135.916	128.302	130.109	124.046	135.714	74.0396	146.861	139.326	146.187	144.394	129.869	114.851	1.27284	0.517702	0.626108
Q91V61	Sideroflexin-3 OS=Mus musculus OX=10090 GN=Sfxn3 PE=1 SV=1	3	4	4	747.301	784.851	746.369	739.596	759.411	712.874	727.096	663.086	720.747	658.537	665.181	692.539	759.298	737.046	703.043	671.926	1.13003	0.0139366	0.0589163
Q8CI33	CWF19-like protein 1 OS=Mus musculus OX=10090 GN=Cwf19l1 PE=1 SV=2	4	2	5	226.786	206.27	215.619	221.151	216.002	207.543	190.074	219.562	223.928	216.658	212.835	207.58	216.062	214.825	210.634	212.325	1.02577	0.937101	0.950288
Q3THK7	GMP synthase [glutamine-hydrolyzing] OS=Mus musculus OX=10090 GN=Gmps PE=1 SV=2	24	33	28	4825.21	4887.33	4770.32	4956.15	5087.58	4981.58	4988.9	4922.87	5091.45	4681.52	4554.01	4608.43	4827.38	5008.12	5000.59	4614.36	1.08533	0.000335041	0.00654299
P62196	26S proteasome regulatory subunit 8 OS=Mus musculus OX=10090 GN=Psmc5 PE=1 SV=1	21	24	25	4506.12	4682.09	4561.03	4640.43	4566.5	4562.96	4534.45	4421.42	4489.26	4399.73	4410.7	4467.47	4582.5	4589.83	4481.47	4425.87	1.03705	0.0257823	0.0888625
P80318	T-complex protein 1 subunit gamma OS=Mus musculus OX=10090 GN=Cct3 PE=1 SV=1	45	47	50	11769.5	11565.3	11349.8	10888.3	11168.5	10693.2	10574.2	10584	10999.9	10812.9	10727	11001.9	11560.3	10914.9	10717.5	10846.6	1.07863	0.00572186	0.0338827
P52480-2	Isoform M1 of Pyruvate kinase PKM OS=Mus musculus OX=10090 GN=Pkm	2	2	4	458.381	465.434	469.545	405.988	413.463	401.256	436.338	445.536	450.544	491.072	467.346	470.435	464.431	406.871	444.1	476.169	1.17032	3.0301e-05	0.00157858
Q8R0J2	Mannose-P-dolichol utilization defect 1 OS=Mus musculus OX=10090 GN=Mpdu1 PE=1 SV=1	1			14.8547			13.7325			7.0305			6.53634			14.8547	13.7325	7.0305	6.53634	2.27263
Q9D832	DnaJ homolog subfamily B member 4 OS=Mus musculus OX=10090 GN=Dnajb4 PE=1 SV=1	5	4	10	830.417	866.796	822.818	870.455	832.161	871.993	819.564	784.166	840.324	833.241	870.554	818.541	839.793	858.003	814.353	840.496	1.0536	0.287047	0.424695
Q8R1F6	Protein HID1 OS=Mus musculus OX=10090 GN=Hid1 PE=1 SV=1	2	3	3	160.679	146.375	143.832	151.099	149.649	149.963	160.471	144.44	147.697	115.666	147.451	146.423	150.116	150.236	150.714	135.672	1.11087	0.359973	0.49577
Q9D6R2	Isocitrate dehydrogenase [NAD] subunit alpha, mitochondrial OS=Mus musculus OX=10090 GN=Idh3a PE=1 SV=1	13	14	15	3026.9	3041.43	3000.29	2920.56	2859.58	3063.94	3002	3034.65	3078.92	3082.09	3095.89	2888.4	3022.82	2946.8	3038.36	3020.62	1.03107	0.546788	0.649123
Q9Z2D1	Myotubularin-related protein 2 OS=Mus musculus OX=10090 GN=Mtmr2 PE=1 SV=3	1	5	5	191.718	203.436	203.626	182.385	203.657	194.857	266.906	188.144	198.482	158.707	204.479	202.751	199.515	193.435	215.207	187.386	1.14847	0.579258	0.674936
Q9Z0U1	Tight junction protein ZO-2 OS=Mus musculus OX=10090 GN=Tjp2 PE=1 SV=2	12	11	18	1339.6	1218.92	1252.31	1249.44	1362.41	1275.34	1261.72	1280.69	1369.43	1284.74	1273.48	1238.42	1269.27	1294.84	1303.11	1265.39	1.02981	0.77089	0.824277
O35344	Importin subunit alpha-4 OS=Mus musculus OX=10090 GN=Kpna3 PE=1 SV=1	7	6	9	838.639	809.385	810.474	816.729	873.404	838.419	769.456	843.381	796.965	800.865	699.519	779.832	819.388	842.529	802.692	758.787	1.11036	0.118589	0.238093
Q9D786	HAUS augmin-like complex subunit 5 OS=Mus musculus OX=10090 GN=Haus5 PE=1 SV=1	5	1	3	106.84	109.279	92.9919	101.729	86.2138	100.411	98.2921	94.7994	109.85	90.7892	107.358	94.3968	102.779	95.852	100.78	97.2617	1.07227	0.747784	0.806407
P47911	60S ribosomal protein L6 OS=Mus musculus OX=10090 GN=Rpl6 PE=1 SV=3	11	11	17	4627.93	4295.38	4255.2	4291.37	4458.98	4469.44	4846.73	4969.13	4900.97	4866.17	4908.71	5006.59	4389.71	4405.84	4905.36	4926.81	1.12235	0.000862488	0.0107159
Q8R1A4	Dedicator of cytokinesis protein 7 OS=Mus musculus OX=10090 GN=Dock7 PE=1 SV=3	20	28	25	4170.28	4020.1	4003.82	4196.41	4322.19	4324.83	4094.05	4098.12	4277.1	3950.56	3970.89	3805.55	4064.05	4280.72	4155.56	3908.3	1.09529	0.00608842	0.0350777
Q8BHK9	DNA excision repair protein ERCC-6-like OS=Mus musculus OX=10090 GN=Ercc6l PE=1 SV=1	10	10	11	1675.73	1841.75	1734.39	1678.18	1667.57	1842.24	1848.63	1695.52	1673.79	1612.35	1610.06	1564.47	1749.28	1727.52	1737.61	1595.48	1.0964	0.125091	0.245672
P52431	DNA polymerase delta catalytic subunit OS=Mus musculus OX=10090 GN=Pold1 PE=1 SV=2	7	8	7	531.589	557.331	556.999	573.808	560.895	538.548	512.391	548.497	578.097	638.599	589.664	582.744	548.506	557.559	545.665	603.166	1.10538	0.0791209	0.183104
Q8QZS1	3-hydroxyisobutyryl-CoA hydrolase, mitochondrial OS=Mus musculus OX=10090 GN=Hibch PE=1 SV=1	11	8	5	868.111	845.488	868.124	839.247	792.073	844.589	835.259	858.354	822.906	842.696	889.398	849.695	860.508	824.961	838.712	860.353	1.04309	0.218073	0.355165
P97471	Mothers against decapentaplegic homolog 4 OS=Mus musculus OX=10090 GN=Smad4 PE=1 SV=2	3	2	3	89.5435	97.7711	91.0879	87.62	113.788	102.271	103.563	105.089	107.539	115.328	79.4062	95.1561	92.7332	100.651	105.384	95.5158	1.13643	0.575819	0.672603
Q9Z1G3	V-type proton ATPase subunit C 1 OS=Mus musculus OX=10090 GN=Atp6v1c1 PE=1 SV=4	10	16	16	2601.58	2692.77	2667.97	2818.52	2686.12	2744.76	2844.54	2736.48	2623.35	2542.03	2691.29	2770.58	2653.83	2749.27	2733.3	2666.27	1.03596	0.510392	0.620028
Q8CBQ5	Phosphatidylinositol 4-kinase type 2-beta OS=Mus musculus OX=10090 GN=Pi4k2b PE=1 SV=1	2	1	1	67.5942	73.0435	57.2268	67.3514	65.9273	68.4778	67.0095	59.3393	70.1636	62.813	66.458	68.8998	65.6191	67.244	65.3427	66.0093	1.0291	0.971751	0.975918
Q6PD19	Armadillo-like helical domain-containing protein 3 OS=Mus musculus OX=10090 GN=Armh3 PE=1 SV=2		4	2		502.833	512.278		458.589	470.195		467.38	440.223		503.865	509.973	507.534	464.356	453.599	506.91	1.1189	0.0190372	0.072709
Q8BU30	Isoleucine--tRNA ligase, cytoplasmic OS=Mus musculus OX=10090 GN=Iars PE=1 SV=2	39	37	37	8459.71	8665.29	8227.98	7676.53	7746.22	7738.08	7531.34	7362.23	7572.5	8063.06	7956.9	8192.08	8449.1	7720.21	7488.14	8070.11	1.12833	0.000113117	0.00321115
O09167	60S ribosomal protein L21 OS=Mus musculus OX=10090 GN=Rpl21 PE=1 SV=3	5	7	11	2303.32	2006.47	2061.9	1956.36	2268.82	2125.32	2173.84	2166.85	2200.67	2242.21	2233.59	2287.84	2120.07	2112.96	2180.41	2254.42	1.06695	0.44866	0.569601
Q02053	Ubiquitin-like modifier-activating enzyme 1 OS=Mus musculus OX=10090 GN=Uba1 PE=1 SV=1	66	74	75	22502.9	22943	23428.5	22355.7	22267.7	22051.7	22078.6	22007.9	21620.6	22877.4	22596.1	22713.7	22955	22224.7	21901.4	22728.8	1.04811	0.00660463	0.0371177
P05480	Neuronal proto-oncogene tyrosine-protein kinase Src OS=Mus musculus OX=10090 GN=Src PE=1 SV=4	1	3	2	195.206	139.195	142.326	77.2903	138.753	130.953	48.3436	117.915	133.018	207.962	132.939	122.505	156.964	111.985	91.1882	150.175	1.72132	0.287423	0.42483
Q8CHP5	Partner of Y14 and mago OS=Mus musculus OX=10090 GN=Pym1 PE=1 SV=2	3	2	3	427.979	342.611	427.917	382.111	408.32	409.676	417.57	485.015	473.903	509.927	501.64	426.089	397.369	399.831	457.852	477.676	1.2021	0.0905248	0.200387
Q9DBS2	Tumor protein p63-regulated gene 1-like protein OS=Mus musculus OX=10090 GN=Tprg1l PE=1 SV=1	1	1	2	121.443	123.016	127.165	102.209	117.691	118.524	122.65	106.827	94.7964	119.124	117.891	124.941	123.851	112.55	107.493	120.613	1.15218	0.19352	0.32712
Q8BML9	Glutamine--tRNA ligase OS=Mus musculus OX=10090 GN=Qars PE=1 SV=1	15	15	17	2742.08	2752.22	2769.99	2889.88	3016.17	2887.08	2732.82	2934.32	2826.47	2876.59	2538.64	2757.83	2754.74	2930.43	2830.01	2720.71	1.07708	0.168373	0.299188
Q9CZ28	Vacuolar-sorting protein SNF8 OS=Mus musculus OX=10090 GN=Snf8 PE=1 SV=1	3	3	5	621.943	665.524	642.693	643.982	606.317	650.25	642.484	647.06	640.824	663.657	653.165	638.298	643.141	633.215	643.451	651.624	1.02907	0.661033	0.738264
Q9EQJ9	Membrane-associated guanylate kinase, WW and PDZ domain-containing protein 3 OS=Mus musculus OX=10090 GN=Magi3 PE=1 SV=2	4	5	7	733.065	669.766	690.483	701.51	696.812	711.116	621.346	732.656	713.654	725.47	682.157	666.137	697.278	703.121	687.449	690.805	1.0228	0.957639	0.965679
Q9Z1M4	Ribosomal protein S6 kinase beta-2 OS=Mus musculus OX=10090 GN=Rps6kb2 PE=1 SV=1	2	1		59.204	50.7546		50.9476	48.4925		44.5837	53.0451		61.782	64.225		54.8167	49.7049	48.6307	62.9917	1.29531	0.112906	0.229348
A0A0R4J0H7	Condensin complex subunit 1 OS=Mus musculus OX=10090 GN=Ncapd2 PE=1 SV=1	30	1	1	133.435	135.635	145.354	129.243	120.779	161.508	122.161	115.373	92.7156	132.106	145.158	117.367	138.046	136.102	109.328	131.05	1.26268	0.14149	0.265393
Q9D6K7	Tetratricopeptide repeat protein 33 OS=Mus musculus OX=10090 GN=Ttc33 PE=1 SV=1		3	2		182.406	195.352		189.619	182.517		185.252	171.381		174.091	182.116	188.768	186.034	178.182	178.058	1.06015	0.47732	0.593199
O55201	Transcription elongation factor SPT5 OS=Mus musculus OX=10090 GN=Supt5h PE=1 SV=1	13	13	16	1855.68	1786.45	1761.32	1828.4	1865.43	1869.15	1808.95	1868.85	1887.51	1873.96	1846.24	1848.99	1800.71	1854.23	1854.8	1856.36	1.0309	0.216338	0.353691
P54775	26S proteasome regulatory subunit 6B OS=Mus musculus OX=10090 GN=Psmc4 PE=1 SV=2	19	17	20	3416	3454.8	3351.88	3351.75	3235.45	3363.75	3255.67	3300.86	3198.49	3268.73	3301.03	3378.02	3407.29	3316.48	3251.41	3315.61	1.04794	0.0649947	0.161872
Q9Z2D8	Methyl-CpG-binding domain protein 3 OS=Mus musculus OX=10090 GN=Mbd3 PE=1 SV=1	3	2	3	278.103	264.89	247.098	250.792	244.087	292.789	285.861	280.717	293.131	281.948	307.01	263.686	263.055	261.701	286.525	283.663	1.09486	0.303942	0.441721
Q8C5Q4	G-rich sequence factor 1 OS=Mus musculus OX=10090 GN=Grsf1 PE=1 SV=2	1			175.195			165.783			158.11			164.696			175.195	165.783	158.11	164.696	1.10806
P12265	Beta-glucuronidase OS=Mus musculus OX=10090 GN=Gusb PE=1 SV=2	8	12	7	1474.78	1562.76	1553.8	1651.85	1588.22	1698.42	1628.58	1649.09	1544.64	1628.06	1583.2	1586.41	1529.93	1645.54	1606.8	1599.09	1.07557	0.0907475	0.200595
P47713	Cytosolic phospholipase A2 OS=Mus musculus OX=10090 GN=Pla2g4a PE=1 SV=1	19	19	27	3800.03	3982.7	3888	3730.1	3657.86	3765.87	3633.74	3667.88	3553.26	3660.78	3516.21	3617.52	3889.53	3717.67	3617.97	3597.66	1.08113	0.00393182	0.0268074
Q9QYR9	Acyl-coenzyme A thioesterase 2, mitochondrial OS=Mus musculus OX=10090 GN=Acot2 PE=1 SV=2	8	10	11	1586.49	1784.13	1801.48	1835.02	1659.85	1777.11	1874.33	1805.4	1724.43	1648.64	1695.11	1641.47	1721.2	1755.8	1800.34	1661.57	1.08352	0.306084	0.443594
P63330	Serine/threonine-protein phosphatase 2A catalytic subunit alpha isoform OS=Mus musculus OX=10090 GN=Ppp2ca PE=1 SV=1	16	16	1	1313.3	1365.2	1372.92	1379.49	1319.36	1473.16	1370.82	1333.2	1298.96	1326.06	1371.91	1244.63	1350.21	1389.24	1334	1313.13	1.05796	0.442604	0.564432
P62996	Transformer-2 protein homolog beta OS=Mus musculus OX=10090 GN=Tra2b PE=1 SV=1	2	1	3	202.247	170.995	184.251	166.511	197.358	166.88	155.496	181.361	181.802	200.009	174.549	191.33	185.392	176.347	172.433	188.329	1.09218	0.577829	0.674109
Q8CB44	GRAM domain-containing protein 4 OS=Mus musculus OX=10090 GN=Gramd4 PE=1 SV=1	2	3	1	84.2636	90.6408	89.8347	88.8852	88.1963	93.8861	91.634	97.3659	97.4789	95.6186	84.1984	79.2017	88.2001	90.2874	95.4534	86.0717	1.109	0.229607	0.368157
Q61879	Myosin-10 OS=Mus musculus OX=10090 GN=Myh10 PE=1 SV=2	74	72	78	14630.5	12992.1	13093.2	14955.5	14927.1	15217	13538.1	15000.7	15310.6	14438.6	14642.7	13941.8	13551.7	15032.6	14595.6	14338	1.10928	0.14288	0.267059
Q8K2V6	Importin-11 OS=Mus musculus OX=10090 GN=Ipo11 PE=1 SV=1	4	3	3	371.148	367.536	348.968	357.406	350.293	368.341	307.966	338.095	369.282	360.903	341.499	310.83	362.419	358.603	337.52	337.107	1.07509	0.389106	0.519399
A2AN08	E3 ubiquitin-protein ligase UBR4 OS=Mus musculus OX=10090 GN=Ubr4 PE=1 SV=1	48	41	40	6524.33	6635.19	6513.39	6535.89	6364.76	6409.65	6440.05	6410.31	6398.7	6198.04	6288.05	6376.57	6557.4	6436.36	6416.33	6287.13	1.04299	0.0123847	0.0545207
P56183	Ribosomal RNA processing protein 1 homolog A OS=Mus musculus OX=10090 GN=Rrp1 PE=1 SV=2	3	5	4	190.174	184.337	174.206	179.24	166.34	166.673	168.686	170.42	176.269	163.464	180.467	184.416	182.786	170.647	171.762	175.876	1.07113	0.319454	0.457413
Q9EPN1	Neurobeachin OS=Mus musculus OX=10090 GN=Nbea PE=1 SV=1	2	1	4	68.0297	49.2934	78.6753	75.6681	92.6997	68.6917	78.0163	78.2163	71.821	68.7514	70.2563	71.2777	64.137	78.3968	75.9588	70.0875	1.22233	0.382545	0.513569
Q91V09	WD repeat-containing protein 13 OS=Mus musculus OX=10090 GN=Wdr13 PE=1 SV=1	1	1	2	465.546	456.101	453.912	444.69	443.731	431.478	414.828	451.056	428.028	459.283	433.459	470.929	458.492	439.925	431.046	454.285	1.06367	0.141781	0.265601
P56135	ATP synthase subunit f, mitochondrial OS=Mus musculus OX=10090 GN=Atp5j2 PE=1 SV=3	3	2	2	949.044	914.382	953.903	791.559	846.206	816.554	815.852	757.683	798.877	881.037	919.22	868.157	938.944	817.802	790.423	889.209	1.1879	0.000586456	0.00872051
Q7TNP2	Serine/threonine-protein phosphatase 2A 65 kDa regulatory subunit A beta isoform OS=Mus musculus OX=10090 GN=Ppp2r1b PE=1 SV=2	4	6	4	475.888	489.28	474.896	485.094	496.879	440.994	456.07	428.824	482.817	476.857	478.927	495.203	479.977	473.699	455.37	483.593	1.06198	0.422654	0.548701
Q9WV60	Glycogen synthase kinase-3 beta OS=Mus musculus OX=10090 GN=Gsk3b PE=1 SV=2	8	13	15	2854.92	2739.48	2787.43	2876.34	2791.34	2824.64	2577.14	2793.26	2806.95	2677.97	2662.28	2567.35	2793.54	2830.56	2723.71	2635.41	1.07405	0.0732767	0.173611
Q9D287	Pre-mRNA-splicing factor SPF27 OS=Mus musculus OX=10090 GN=Bcas2 PE=1 SV=1	1	1		75.9709	61.5732		46.2241	57.523		66.4597	62.469		57.0484	64.138		68.3942	51.565	64.4335	60.4894	1.32637	0.235363	0.37549
Q9DCW4	Electron transfer flavoprotein subunit beta OS=Mus musculus OX=10090 GN=Etfb PE=1 SV=3	14	15	14	4260.22	4338.29	4282.67	4557.16	4265.05	4493.7	4336.6	4512.18	4537.25	4228.81	4267.27	4069.17	4293.6	4436.84	4461.11	4187.53	1.06533	0.0481675	0.133818
Q62093	Serine/arginine-rich splicing factor 2 OS=Mus musculus OX=10090 GN=Srsf2 PE=1 SV=4	5	4	5	654.673	653.997	620.729	585.947	619.451	673.771	615.363	646.935	627.86	716.866	652.466	650.489	642.936	625.354	629.919	672.582	1.07552	0.326322	0.463216
E9PWQ3	Collagen, type VI, alpha 3 OS=Mus musculus OX=10090 GN=Col6a3 PE=1 SV=2	1	2	2	77.0052	71.1996	55.2187	66.3693	75.5407	86.8357	76.884	72.6062	76.9147	64.7359	65.6478	66.0254	67.1472	75.7906	75.4408	65.4674	1.15768	0.305807	0.443468
P31230	Aminoacyl tRNA synthase complex-interacting multifunctional protein 1 OS=Mus musculus OX=10090 GN=Aimp1 PE=1 SV=2	21	13	16	6113.88	6262.71	6119.76	5950.17	6076.07	5798.54	5804.29	5726.5	5870.04	6132.43	5935.49	6212.43	6165.07	5940.51	5799.98	6092.34	1.06295	0.0178228	0.0698606
Q8VDQ1	Prostaglandin reductase 2 OS=Mus musculus OX=10090 GN=Ptgr2 PE=1 SV=2	3	4	4	664.462	692.734	707.655	718.158	706.746	692.962	733.841	739.443	704.325	704.597	682.135	716.117	688.049	705.88	725.704	700.807	1.05473	0.163345	0.29294
Q6PDL0	Cytoplasmic dynein 1 light intermediate chain 2 OS=Mus musculus OX=10090 GN=Dync1li2 PE=1 SV=2	13	7	11	1909.08	1848.97	1911.93	2042.85	2191.77	2019.84	2135.02	2194.63	2149.41	1935.07	1786.65	1940.84	1889.77	2083.45	2159.54	1886.15	1.14495	0.00247093	0.0199549
Q62422	Osteoclast-stimulating factor 1 OS=Mus musculus OX=10090 GN=Ostf1 PE=1 SV=2	6	11	8	1582.39	1704.1	1769.88	1654.35	1657.84	1625.13	1732.04	1621.19	1553.73	1728.02	1713.67	1748.06	1683.64	1645.7	1634.01	1729.86	1.05866	0.361084	0.496623
O88477	Insulin-like growth factor 2 mRNA-binding protein 1 OS=Mus musculus OX=10090 GN=Igf2bp1 PE=1 SV=1	4	5	6	571.507	490.016	541.577	521.443	572.029	508.166	516.362	585.229	578.863	579.697	541.735	560.403	533.291	533.184	559.266	560.398	1.05104	0.635465	0.717406
O70492	Sorting nexin-3 OS=Mus musculus OX=10090 GN=Snx3 PE=1 SV=3	7	6	6	1728.56	1728.32	1840.83	1860.86	1846.79	1777.31	1714.35	1807.92	1688.12	1921.92	1842.65	1919.42	1765.12	1827.95	1736.04	1894.31	1.09116	0.0346943	0.106703
P54310	Hormone-sensitive lipase OS=Mus musculus OX=10090 GN=Lipe PE=1 SV=2	3	2	1	94.7117	84.6515	93.8612	87.1217	77.9822	56.5185	77.7491	84.4876	81.3279	72.3522	84.8135	100.227	90.9581	72.6838	81.1414	85.0421	1.25142	0.341823	0.478368
Q52KR3	Protein prune homolog 2 OS=Mus musculus OX=10090 GN=Prune2 PE=1 SV=2	20	25	17	2864.73	2863.7	2786.76	2780.64	2810.82	2807.53	2733.34	2585.08	2675.47	2644.69	2763.8	2753.65	2838.16	2799.63	2663.93	2720.18	1.0654	0.0207914	0.0769858
Q9D554	Splicing factor 3A subunit 3 OS=Mus musculus OX=10090 GN=Sf3a3 PE=1 SV=2	3	2	5	338.74	315.752	320.378	293.964	317.433	324.88	331.212	361.24	341.343	354.679	324.17	331.995	324.807	311.81	344.375	336.703	1.10444	0.11204	0.228669
P42230	Signal transducer and activator of transcription 5A OS=Mus musculus OX=10090 GN=Stat5a PE=1 SV=1	15	16	18	3099.02	3079.07	3020.77	3265.53	3234.22	3223.31	2915.59	3127.32	3009.64	3202.53	3042.06	3228.95	3066.11	3240.97	3016.27	3156.75	1.0745	0.0329522	0.103243
Q8BH97	Reticulocalbin-3 OS=Mus musculus OX=10090 GN=Rcn3 PE=1 SV=1	18	15	12	2043.57	2097.53	1980.52	2242.39	2222.23	2408.5	2225.22	2231.79	2262.14	2113.36	2072.99	1973.37	2039.98	2289.55	2239.66	2052.39	1.12234	0.00403777	0.0272203
O54916	RalBP1-associated Eps domain-containing protein 1 OS=Mus musculus OX=10090 GN=Reps1 PE=1 SV=2	1	4	2	223.805	204.735	197.29	202.057	181.971	206.523	196.839	209.019	198.712	189.866	216.843	210.044	208.316	196.554	201.453	205.258	1.05984	0.682591	0.755496
Q3UQN2	F-BAR domain only protein 2 OS=Mus musculus OX=10090 GN=Fcho2 PE=1 SV=1	3	10	4	483.732	488.583	551.3	573.478	550.653	516.05	576.033	565.91	535.746	461.521	489.619	491.669	506.964	546.213	558.965	480.737	1.16273	0.0261963	0.089908
Q6P1F6	Serine/threonine-protein phosphatase 2A 55 kDa regulatory subunit B alpha isoform OS=Mus musculus OX=10090 GN=Ppp2r2a PE=1 SV=1	11	12	13	2199.73	2367.76	2325.72	2518.44	2376.29	2453.05	2519.4	2548.16	2490.79	2268.4	2213.75	2236.42	2296.62	2448.57	2519.34	2239.41	1.125	0.00156585	0.0152801
Q6NXJ0	Protein WWC2 OS=Mus musculus OX=10090 GN=Wwc2 PE=1 SV=1	8	5	6	1059.48	1100.4	1062.52	1014.8	939.752	976.486	1000.25	1015.86	1013.33	1064.3	1082.82	1086.5	1073.97	976.533	1009.79	1077.83	1.10373	0.00180854	0.0166102
P10853	Histone H2B type 1-F/J/L OS=Mus musculus OX=10090 GN=Hist1h2bf PE=1 SV=2	7	6	10	1635.69	1601.18	1472.8	1326.87	1321	1688.77	1505.86	1476.06	1396.71	1704.15	1774.33	1614.29	1568.3	1435.82	1458.81	1696.32	1.18143	0.121787	0.241614
P24547	Inosine-5'-monophosphate dehydrogenase 2 OS=Mus musculus OX=10090 GN=Impdh2 PE=1 SV=2	15	20	22	4733.35	4581.9	4512.89	4141.62	4422.39	4047.3	4184.84	4183.8	4416.03	4443.96	4315.67	4527.53	4608.47	4200.79	4260.17	4428.19	1.09705	0.0323608	0.101867
Q8K310	Matrin-3 OS=Mus musculus OX=10090 GN=Matr3 PE=1 SV=1	4	4	1	131.369	112.745	146.34	126.051	135.26	145.401	141.175	157.934	93.7227	139.323	131.98	152.455	129.415	135.34	127.848	141.002	1.10289	0.870966	0.899384
Q91W67	Ubiquitin-like protein 7 OS=Mus musculus OX=10090 GN=Ubl7 PE=1 SV=2	5	4	5	283.896	257.265	300.662	289.558	236.042	279.525	274.892	285.021	258.532	270.702	340.721	280.329	280.031	267.331	272.595	295.701	1.10613	0.610118	0.699069
P23506	Protein-L-isoaspartate(D-aspartate) O-methyltransferase OS=Mus musculus OX=10090 GN=Pcmt1 PE=1 SV=3	8	14	9	2156.12	2224.6	2223.73	2362.89	2168.55	2192.76	2272.76	2275.3	2286.69	2236.55	2359.86	2325.13	2201.25	2239.76	2278.24	2306.59	1.04786	0.282827	0.41976
Q9CSN1	SNW domain-containing protein 1 OS=Mus musculus OX=10090 GN=Snw1 PE=1 SV=3	4	2	2	190.27	189.782	177.517	175.14	176.215	184.381	204.207	202.73	205.536	194.402	195.292	196.584	185.761	178.531	204.154	195.424	1.14352	0.000779851	0.00998039
Q8CEC6	Peptidylprolyl isomerase domain and WD repeat-containing protein 1 OS=Mus musculus OX=10090 GN=Ppwd1 PE=1 SV=2	4	3	2	414.692	386.189	394.532	381.971	408.557	402.48	349.623	387.936	395.88	453.118	416.722	406.512	398.293	397.505	377.26	424.988	1.12651	0.109895	0.226163
Q9D1A2	Cytosolic non-specific dipeptidase OS=Mus musculus OX=10090 GN=Cndp2 PE=1 SV=1	12	14	11	1579.86	1682.3	1708.73	1700.57	1594.71	1592.75	1647.84	1640.23	1633.45	1634.01	1645.02	1627.33	1656.02	1628.58	1640.5	1635.44	1.01685	0.90002	0.92227
Q8QZT1	Acetyl-CoA acetyltransferase, mitochondrial OS=Mus musculus OX=10090 GN=Acat1 PE=1 SV=1	18	22	27	3697.72	3503.72	3694.92	3605.21	3528.82	3375.62	3338.06	3427.87	3411.09	3709.57	3890.14	3868.93	3630.97	3501.91	3392.11	3822.02	1.12674	0.0036319	0.0254668
Q3URD3	Sarcolemmal membrane-associated protein OS=Mus musculus OX=10090 GN=Slmap PE=1 SV=2	1	2	1	212.451	186.851	178.274	187.362	192.609	196.918	179.294	188.734	178.664	175.573	186.488	200.825	191.991	192.256	182.173	187.345	1.05535	0.669384	0.744572
Q9EST4	Proteasome assembly chaperone 2 OS=Mus musculus OX=10090 GN=Psmg2 PE=1 SV=1	3	3	1	353.739	327.554	336.509	344.522	339.669	310.297	312.239	323.679	329.413	305.592	325.191	339.874	339.095	331.144	321.697	323.246	1.05408	0.505574	0.616213
P59325	Eukaryotic translation initiation factor 5 OS=Mus musculus OX=10090 GN=Eif5 PE=1 SV=1	9	11	13	2132.01	1911.94	2017.95	1830.67	2067.1	1900.96	1830.36	1844.3	1877.61	2044.82	2014.52	2041.33	2018.64	1930.41	1850.65	2033.51	1.09881	0.0811745	0.185927
Q6ZWV7	60S ribosomal protein L35 OS=Mus musculus OX=10090 GN=Rpl35 PE=1 SV=1	2	2	4	1950.21	1801.63	1731.34	1806.75	1950.54	1848.99	2009.05	1979.93	2091.54	1955.55	1989.46	2049.69	1825.48	1867.8	2026.29	1997.85	1.11001	0.0356874	0.108899
P68368	Tubulin alpha-4A chain OS=Mus musculus OX=10090 GN=Tuba4a PE=1 SV=1	7	8	8	4388.74	4162.55	4125.04	3937.81	4291.56	4260.56	3813.61	4303.92	4236.91	4646.38	4028.5	4164.03	4223.86	4160.18	4112.29	4271.6	1.03874	0.857862	0.890564
Q9CQI3	Glia maturation factor beta OS=Mus musculus OX=10090 GN=Gmfb PE=1 SV=3	3	3	3	743.31	746.316	766.558	834.77	848.632	819.107	852.57	853.075	834.41	777.961	760.589	788.535	751.991	834.083	846.64	775.609	1.12586	5.48631e-05	0.00212639
Q8BH64	EH domain-containing protein 2 OS=Mus musculus OX=10090 GN=Ehd2 PE=1 SV=1	25	27	28	4752.74	4368.02	4482.3	4600.19	4680.84	4581.37	3891.05	4122.39	4177.94	4635.39	4708.12	4637.76	4531.51	4620.6	4061.87	4660.3	1.14733	0.00154789	0.0151999
Q9Z129	ATP-dependent DNA helicase Q1 OS=Mus musculus OX=10090 GN=Recql PE=1 SV=2	1	1	1	61.8939	55.0914	53.0212	63.5854	68.4353	56.9673	65.4677	56.2275	71.5155	59.6923	70.8851	69.1353	56.5449	62.8185	64.0903	66.3831	1.17399	0.289964	0.427178
Q9JMG1	Endothelial differentiation-related factor 1 OS=Mus musculus OX=10090 GN=Edf1 PE=1 SV=1	1	1	1	319.005	242.864	259.524	313.419	366.87	320.081	295.25	324.748	369.822	285.9	279.092	264.146	271.923	332.634	328.531	276.228	1.22326	0.0752855	0.176672
O88712	C-terminal-binding protein 1 OS=Mus musculus OX=10090 GN=Ctbp1 PE=1 SV=2	6	6	5	1333.93	1402.09	1320	1414.61	1365.55	1336.12	1403.46	1374.12	1408.98	1321.82	1332.05	1408.71	1351.54	1371.71	1395.44	1353.65	1.03248	0.52323	0.630431
Q921K2	Poly [ADP-ribose] polymerase OS=Mus musculus OX=10090 GN=Parp1 PE=1 SV=1	7	8	9	1079.18	928.413	993.827	1027.22	1084.55	1037.18	995.331	1078.61	1058.07	1062.61	1072.77	1075.26	998.578	1049.35	1043.4	1070.2	1.07172	0.35988	0.49577
Q9D600	DNA replication complex GINS protein PSF2 OS=Mus musculus OX=10090 GN=Gins2 PE=1 SV=1	1	2	2	181.451	190.56	208.956	195.789	182.743	162.669	148.781	167.287	179.4	205.092	190.523	180.087	193.322	179.878	164.668	191.628	1.17401	0.140463	0.264092
Q9JI10	Serine/threonine-protein kinase 3 OS=Mus musculus OX=10090 GN=Stk3 PE=1 SV=1	11	13	13	2241.28	2303.87	2345.26	2427.96	2182.78	2210.03	2214.89	2343.37	2236.54	2236.2	2290.31	2328.5	2296.4	2271	2264.24	2284.69	1.0142	0.963109	0.969526
Q8R060	Protein zwilch homolog OS=Mus musculus OX=10090 GN=Zwilch PE=1 SV=1	9	9	9	1395.01	1349.31	1309.6	1280.16	1329.05	1294.99	1188.76	1262.33	1284.54	1309.73	1232.96	1284.53	1350.86	1301.24	1244.53	1275.34	1.08544	0.0642446	0.160749
Q921M3	Splicing factor 3B subunit 3 OS=Mus musculus OX=10090 GN=Sf3b3 PE=1 SV=1	28	24	28	4774.4	4698.7	4614.74	4727.02	4776.16	4630.33	4702.76	4611.47	4847.34	4749.48	4867.34	4861.26	4695.49	4710.78	4719.53	4825.72	1.02773	0.31988	0.457782
Q922D8	C-1-tetrahydrofolate synthase, cytoplasmic OS=Mus musculus OX=10090 GN=Mthfd1 PE=1 SV=4	40	42	46	10466.3	10341.1	10127	9767.02	9737.48	9503.2	9368.62	9517.3	9777.7	9949.09	9955.21	10143.1	10310.5	9668.51	9553.05	10015.4	1.07929	0.00181924	0.0166758
P10417	Apoptosis regulator Bcl-2 OS=Mus musculus OX=10090 GN=Bcl2 PE=1 SV=3	6	4	4	318.578	337.337	324.048	312.725	316.997	333.117	329.757	302.066	288.424	329.965	334.625	345.436	326.56	320.827	306.274	336.613	1.09906	0.122716	0.242586
Q8C166	Copine-1 OS=Mus musculus OX=10090 GN=Cpne1 PE=1 SV=1	11	12	10	1748.43	1900.84	1932.87	1966.83	1653.21	2203.3	1859.59	1960.66	1419.82	1816.38	1876.52	1835.25	1858.94	1927.77	1729.89	1842.55	1.11439	0.724136	0.787886
Q9DBE0	Cysteine sulfinic acid decarboxylase OS=Mus musculus OX=10090 GN=Csad PE=1 SV=1	5	8	7	1451.01	1530.15	1512.12	1736.57	1564.24	1721.85	1762.01	1791.43	1722.44	1487.06	1550.84	1480.25	1497.37	1672.36	1758.4	1505.71	1.17432	0.00131961	0.0140479
Q9D7B6	Isobutyryl-CoA dehydrogenase, mitochondrial OS=Mus musculus OX=10090 GN=Acad8 PE=1 SV=2	4	3	5	820.605	813.976	791.615	810.002	796.369	837.743	801.792	805.379	796.985	776.657	793.332	782.713	808.636	814.524	801.378	784.204	1.03866	0.109206	0.225141
Q99L47	Hsc70-interacting protein OS=Mus musculus OX=10090 GN=St13 PE=1 SV=1	11	15	20	7099.41	7467.19	7413.9	7355.49	7071.68	7247.44	7350.11	7345.42	6917.27	7455.89	7376.59	7682.28	7325.02	7223.92	7201.37	7503.81	1.042	0.285896	0.423376
Q8C0C7	Phenylalanine--tRNA ligase alpha subunit OS=Mus musculus OX=10090 GN=Farsa PE=1 SV=1	13	12	19	2194.24	2029.57	2090.75	2084.8	2223.98	2156.24	2263.2	2335.54	2330.05	2342.84	2296	2308.05	2103.76	2154.26	2309.36	2315.55	1.10067	0.0052148	0.0320974
P54103	DnaJ homolog subfamily C member 2 OS=Mus musculus OX=10090 GN=Dnajc2 PE=1 SV=2	8	6	8	912.943	826.968	855.97	898.899	997.509	876.626	932.83	955.798	931.149	864.358	828.754	945.284	864.564	922.885	939.859	878.134	1.08709	0.268066	0.406482
Q64261	Cyclin-dependent kinase 6 OS=Mus musculus OX=10090 GN=Cdk6 PE=1 SV=2	6		3	713.361		702.128	806.096		780.653	769.591		777.842	687.539		715.964	707.722	793.272	773.706	701.608	1.13065	0.00694615	0.0381875
Q9R0Q7	Prostaglandin E synthase 3 OS=Mus musculus OX=10090 GN=Ptges3 PE=1 SV=1	8	6	11	1908.65	1955.94	1985.05	1937.4	1999.79	2001.83	2229.9	2297.98	2154.96	2082.56	1904.81	2016.67	1949.63	1979.44	2226.85	1999.99	1.14219	0.00280326	0.0217392
Q8BHN3	Neutral alpha-glucosidase AB OS=Mus musculus OX=10090 GN=Ganab PE=1 SV=1	25	3	2	1077.81	1141.62	1146.97	1161.48	1165.52	1136.18	1133.81	1090.02	1109.12	1106.52	1082.46	1087.36	1121.69	1154.32	1110.84	1092.06	1.05701	0.074821	0.176023
Q9Z1K5	E3 ubiquitin-protein ligase ARIH1 OS=Mus musculus OX=10090 GN=Arih1 PE=1 SV=3	6	7	5	1473.34	1465.72	1418.18	1521.17	1484.74	1470.12	1446.94	1391.59	1462.5	1363.01	1462.41	1453.67	1452.2	1491.86	1433.35	1425.65	1.04644	0.248884	0.388332
Q8BTZ7	Mannose-1-phosphate guanyltransferase beta OS=Mus musculus OX=10090 GN=Gmppb PE=1 SV=1	2	3	3	424.205	426.92	446.904	415.125	455.444	458.467	441.437	440.761	448.705	512.91	470.552	439.6	432.559	442.562	443.62	473.408	1.09444	0.222612	0.35993
Q9ES56	Trafficking protein particle complex subunit 4 OS=Mus musculus OX=10090 GN=Trappc4 PE=1 SV=1	3	5	4	528.192	527.661	493.966	566.731	597.328	604.101	544.665	543.641	554.205	517.027	487.984	504.342	516.354	589.16	547.483	502.977	1.17135	0.000875218	0.0107882
P18828	Syndecan-1 OS=Mus musculus OX=10090 GN=Sdc1 PE=1 SV=1	2	2	1	223.512	187.112	180.486	189.75	191.237	202.811	180.54	194.454	195.907	177.2	198.199	191.797	196.162	194.513	190.172	188.858	1.03867	0.895391	0.918531
Q6A028	Switch-associated protein 70 OS=Mus musculus OX=10090 GN=Swap70 PE=1 SV=2	6	9	11	1670.57	1607.01	1608.16	1666.35	1689.87	1866.18	1837.9	1960.16	1810.11	1667.13	1584.92	1557.5	1628.31	1738.56	1868.27	1602.51	1.16584	0.00855878	0.0433667
P62717	60S ribosomal protein L18a OS=Mus musculus OX=10090 GN=Rpl18a PE=1 SV=1	5	8	7	1738.87	1461.65	1584.4	1545.87	1721.25	1607.69	1836.09	1903.5	1924.67	1706.41	1740.84	1710.48	1590.96	1623.33	1887.71	1719.18	1.18652	0.0170032	0.0677236
Q920B9	FACT complex subunit SPT16 OS=Mus musculus OX=10090 GN=Supt16h PE=1 SV=2	15	12	16	3019.04	2946.32	2971.44	2941.26	2917.52	2795.43	2919.5	2911.78	3092.74	2907.37	3011.57	2927.56	2978.78	2884.02	2973.52	2948.49	1.03286	0.404166	0.533272
Q9CZW4	Long-chain-fatty-acid--CoA ligase 3 OS=Mus musculus OX=10090 GN=Acsl3 PE=1 SV=2	5	7	9	723.713	714.936	743.93	716.812	722.038	703.804	690.769	695.189	651.613	688.855	687.985	720.802	727.425	714.177	678.904	699.049	1.07147	0.0485798	0.134723
P06151	L-lactate dehydrogenase A chain OS=Mus musculus OX=10090 GN=Ldha PE=1 SV=3	30	32	32	15552.5	16155.9	15532.2	15479.9	14560.6	15445.1	15181.9	14949.3	15611.3	15538.2	16086.8	15163.9	15744.2	15155.8	15245.1	15591.7	1.03882	0.345471	0.482058
P97863	Nuclear factor 1 B-type OS=Mus musculus OX=10090 GN=Nfib PE=1 SV=2	1	1		380.377	339.369		326.877	325.853		283.76	311.609		294.81	308.994		359.289	326.364	297.359	301.819	1.20827	0.0764719	0.17848
E9Q6R7	Utrophin OS=Mus musculus OX=10090 GN=Utrn PE=1 SV=1	46	40	47	6411.47	5835	5884.28	5994.46	6206.96	6031.09	5798.91	5887.71	6310.67	5486.16	5761.33	5464.96	6038.06	6076.8	5995	5569.2	1.09114	0.0772297	0.17968
Q8R088	Golgi phosphoprotein 3-like OS=Mus musculus OX=10090 GN=Golph3l PE=1 SV=1	1	2	1	207.933	201.914	192.32	214.227	200.258	205.462	177.01	200.952	203.27	187.398	183.443	185.515	200.619	206.569	193.37	185.445	1.11391	0.095236	0.207578
E9Q0F0	Keratin 78 OS=Mus musculus OX=10090 GN=Krt78 PE=1 SV=1	1	1	2	384.696	381.033	426.042	448.765	261.523	396.199	237.646	381.442	297.576	405.725	452.834	357.016	396.745	359.595	299.906	403.292	1.34473	0.300984	0.438509
Q921S7	39S ribosomal protein L37, mitochondrial OS=Mus musculus OX=10090 GN=Mrpl37 PE=1 SV=1	1	2	3	178.381	158.773	144.558	155.237	153.319	163.055	126.954	138.924	163.579	161.315	170.872	150.697	159.976	157.148	142.359	160.75	1.12919	0.371534	0.505157
Q9JJ28	Protein flightless-1 homolog OS=Mus musculus OX=10090 GN=Flii PE=1 SV=1	13	12	16	1812.05	1751.54	1789.49	1861.67	1853.85	1823.71	1765.66	1796.18	1842.84	1792.34	1830.14	1775.67	1784.18	1846.34	1801.28	1799.24	1.03484	0.149491	0.275135
Q9JK81	UPF0160 protein MYG1, mitochondrial OS=Mus musculus OX=10090 GN=Myg1 PE=1 SV=1	12	11	14	2467.2	2509.12	2544.77	2588.66	2589.93	2675.06	2602.09	2587.34	2606.86	2548.66	2520.21	2379.91	2506.83	2617.57	2598.75	2481.82	1.0547	0.0458584	0.129569
Q8C3S2	Transport and Golgi organization protein 6 homolog OS=Mus musculus OX=10090 GN=Tango6 PE=1 SV=1	1	4	5	502.447	457.478	449.013	412.067	419.244	434.864	382.49	401.535	422.378	454.935	473.682	445.683	469.072	421.952	401.805	457.953	1.16741	0.00880407	0.0438705
Q9ESY9	Gamma-interferon-inducible lysosomal thiol reductase OS=Mus musculus OX=10090 GN=Ifi30 PE=1 SV=3	1	1	1	144.398	139.872	139.774	133.871	138.529	125.292	115.063	102.26	133.801	115.959	128.63	110.425	141.332	132.449	116.332	118.097	1.2149	0.0565748	0.148374
Q8R3Q2	Serine/threonine-protein phosphatase 6 regulatory subunit 2 OS=Mus musculus OX=10090 GN=Ppp6r2 PE=1 SV=1	1	2	4	123.067	119.1	132.166	127.144	129.461	129.729	120.266	105.879	120.372	129.369	145.407	117.579	124.659	128.773	115.299	130.291	1.13003	0.217229	0.354378
P08030	Adenine phosphoribosyltransferase OS=Mus musculus OX=10090 GN=Aprt PE=1 SV=2	6	8	7	2430.27	2469.06	2509.63	2324.72	2330.24	2214.44	2196.98	2266.73	2209.54	2455.45	2341.39	2473.8	2469.44	2289.17	2224.21	2422.83	1.11025	0.00212063	0.0182593
Q60749	KH domain-containing, RNA-binding, signal transduction-associated protein 1 OS=Mus musculus OX=10090 GN=Khdrbs1 PE=1 SV=2	1	1	3	145.106	115.231	117.025	89.9284	130.236	119.094	113.144	119.581	133.585	132.114	115.245	110.588	125.077	111.731	121.81	118.967	1.11945	0.757128	0.814513
Q5SS80	Dehydrogenase/reductase SDR family member 13 OS=Mus musculus OX=10090 GN=Dhrs13 PE=1 SV=1	1	2	3	289.425	267.491	284.134	289.984	300.48	266.925	318.7	319.118	305.097	267.784	278.804	309.738	280.192	285.448	314.237	284.9	1.1215	0.109338	0.225215
Q920I9	WD repeat-containing protein 7 OS=Mus musculus OX=10090 GN=Wdr7 PE=1 SV=3	2	2	1	93.6639	86.9076	108.118	86.1656	92.4241	71.9074	73.134	81.5093	80.6116	97.8215	89.944	90.1482	95.8317	83.042	78.3264	92.5666	1.22349	0.0938685	0.205362
Q9JLJ5	Elongation of very long chain fatty acids protein 1 OS=Mus musculus OX=10090 GN=Elovl1 PE=1 SV=1	1	1	1	121.076	110.202	113.573	115.324	122.75	106.039	121.421	110.573	121.893	91.6582	105.955	107.975	114.862	114.499	117.844	101.595	1.15994	0.107512	0.223337
Q8JZX5	Leucine rich repeat containing 57 OS=Mus musculus OX=10090 GN=Lrrc57 PE=1 SV=1	5	4	4	790.365	783.007	772.524	811.499	788.218	809.859	763.601	753.371	775.586	753.52	794.388	761.016	781.931	803.121	764.132	769.438	1.05102	0.0463695	0.130213
P22892	AP-1 complex subunit gamma-1 OS=Mus musculus OX=10090 GN=Ap1g1 PE=1 SV=3	13	19	22	2834.05	2942.32	2793.38	3062.48	2967.65	3006.42	2952.47	2948.73	3025.47	2726.46	2716.78	2750.21	2855.9	3011.93	2975.35	2731.11	1.10282	0.000503217	0.00795744
P05064	Fructose-bisphosphate aldolase A OS=Mus musculus OX=10090 GN=Aldoa PE=1 SV=2	30	31	33	17637.5	18487.8	18606.8	17754.9	16969.5	17337.5	17828.7	17847.9	17378.4	18459	18374.9	18357.4	18238.9	17351	17683.7	18397.1	1.06029	0.0236088	0.0839026
Q60823	RAC-beta serine/threonine-protein kinase OS=Mus musculus OX=10090 GN=Akt2 PE=1 SV=1	8	2	6	937.506	951.636	885.391	1011.38	920.506	1039.08	908.401	1088.82	1022.56	963.645	859.967	873.902	924.4	989.002	1003.79	898.023	1.11777	0.204621	0.339633
A2AKG8	Focadhesin OS=Mus musculus OX=10090 GN=Focad PE=1 SV=1	2	1	1	134.382	120.114	127.012	113.903	121.944	113.48	112.127	125.388	113.841	112.503	105.47	118.583	127.036	116.378	116.974	112.057	1.13368	0.107479	0.223337
P11881	Inositol 1,4,5-trisphosphate receptor type 1 OS=Mus musculus OX=10090 GN=Itpr1 PE=1 SV=2	1	1	1	64.8677	84.7532	55.5405	43.7256	24.8268	59.6922	55.0741	27.579	59.8184	61.0891	87.5975	49.7054	67.3387	40.166	44.9559	64.3112	1.67651	0.270514	0.408869
Q9DCT8	Cysteine-rich protein 2 OS=Mus musculus OX=10090 GN=Crip2 PE=1 SV=1	11	12	12	3104.86	3219.27	3177.13	3339.92	3114.95	3332.81	3413.22	3408.01	3370.09	3110.46	3226.23	3088.44	3166.73	3260.86	3397.05	3141.13	1.08147	0.0190378	0.072709
P26039	Talin-1 OS=Mus musculus OX=10090 GN=Tln1 PE=1 SV=2	162	164	169	37214.6	37748.1	38678.6	37705.4	37771.7	37509.5	37296.4	37740.4	37004.1	38749.6	37705.8	37773.8	37875.6	37662	37345.8	38073.4	1.01948	0.393596	0.523454
P56371	Ras-related protein Rab-4A OS=Mus musculus OX=10090 GN=Rab4a PE=1 SV=2	1	2	2	279.565	269.32	253.825	289.288	261.286	268.333	238.414	258.403	271.516	269.011	287.269	282.604	267.359	272.714	255.746	279.519	1.09296	0.264978	0.403352
P17156	Heat shock-related 70 kDa protein 2 OS=Mus musculus OX=10090 GN=Hspa2 PE=1 SV=2	9	10	12	1199.5	1280.32	1309.14	1443.47	1338.62	1382.45	1424.14	1327.33	1273.02	1185.39	1306.23	1287.88	1262.12	1387.52	1340.05	1258.69	1.10235	0.10331	0.217388
Q9D281	Protein Noxp20 OS=Mus musculus OX=10090 GN=Fam114a1 PE=1 SV=1	15	21	18	2946.65	2863.65	2896.91	2700.3	2783.41	3051.86	2760.6	3078.52	2936.37	3286.82	2968.79	2809.24	2902.2	2841.31	2922.26	3015.19	1.0612	0.67219	0.746984
O70572	Sphingomyelin phosphodiesterase 2 OS=Mus musculus OX=10090 GN=Smpd2 PE=1 SV=1	2	4	3	276.716	259.715	268.982	237.828	248.547	268.338	247.942	263.491	254.351	282.315	273.048	253.13	268.381	251.257	255.182	269.219	1.07149	0.247779	0.387382
Q9WUA2	Phenylalanine--tRNA ligase beta subunit OS=Mus musculus OX=10090 GN=Farsb PE=1 SV=2	17	14	17	3183.89	2802.75	2734.1	2933.8	3129.19	3163.15	3074.87	3198.7	3420.18	3152.27	3214.19	3027.41	2900.36	3073.7	3228.12	3130.32	1.11301	0.192503	0.326224
Q80W47	WD repeat domain phosphoinositide-interacting protein 2 OS=Mus musculus OX=10090 GN=Wipi2 PE=1 SV=1	4	3	6	503.764	560.997	513.306	582.605	510.333	538.71	555.026	516.439	535.737	464.878	518.503	518.52	525.438	543.076	535.502	499.979	1.0862	0.368825	0.50396
A0A0A6YVZ7	Protein lin-9 homolog OS=Mus musculus OX=10090 GN=Lin9 PE=1 SV=1	1	1	1	42.3791	41.6468	38.1907	42.118	36.8706	36.292	29.3588	35.7161	42.5343	34.4232	34.0454	31.262	40.6971	38.3401	35.4634	33.2131	1.22533	0.189912	0.323589
Q61490	CD166 antigen OS=Mus musculus OX=10090 GN=Alcam PE=1 SV=3	10	8	12	2900.51	2884.25	3054.91	3216.05	3129.26	3154.74	3096.73	3183.82	2969.29	3014.2	3030.16	3048.54	2945.56	3166.48	3082.02	3030.94	1.075	0.0402022	0.118283
Q7TSH2	Phosphorylase b kinase regulatory subunit beta OS=Mus musculus OX=10090 GN=Phkb PE=1 SV=1	3	5	4	635.432	630.874	676.936	630.52	654.835	646.928	626.189	615.246	608.732	611.795	602.98	571.34	647.421	644.014	616.68	595.115	1.08789	0.0231092	0.0825162
Q9JKR6	Hypoxia up-regulated protein 1 OS=Mus musculus OX=10090 GN=Hyou1 PE=1 SV=1	44	40	47	9001.84	9193.1	9249.93	9502.81	9314.94	9382.99	9597.45	9643.66	9605.31	9123.14	9073.55	8987.01	9147.67	9399.93	9615.45	9061.06	1.06118	0.000252806	0.00558559
G5E814	MCG5603 OS=Mus musculus OX=10090 GN=Ndufa11 PE=1 SV=1	1	1		238.203	238.497		214.59	233.829		229.947	209.919		223.921	224.416		238.35	224.003	219.705	224.168	1.08486	0.395338	0.525472
O08915	AH receptor-interacting protein OS=Mus musculus OX=10090 GN=Aip PE=1 SV=1	11	8	10	2233.23	2214.48	2203.32	2246.2	2256.63	2204.39	2154.42	2235.15	2101.95	2245.59	2173.19	2369.78	2216.98	2235.63	2163.15	2261.41	1.04542	0.314999	0.452454
Q9CR02	Translation machinery-associated protein 16 OS=Mus musculus OX=10090 GN=Tma16 PE=1 SV=1	1	2		143.717	174.435		171.768	137.255		169.475	193.186		151.917	132.002		158.333	153.545	180.943	141.61	1.27776	0.381029	0.512267
Q8BHX1	HAUS augmin-like complex subunit 1 OS=Mus musculus OX=10090 GN=Haus1 PE=1 SV=2	3	7	3	309.084	259.542	269.054	323.613	307.77	327.046	270.974	306.388	297.999	253.862	283.833	263.433	278.425	319.365	291.388	266.754	1.19723	0.0461532	0.12999
Q9D880	Mitochondrial import inner membrane translocase subunit TIM50 OS=Mus musculus OX=10090 GN=Timm50 PE=1 SV=1	4	1	4	337.527	358.964	341.353	349.586	364.609	344.61	357.793	367.198	346.754	346.832	300.966	359.021	345.823	352.834	357.151	334.646	1.06725	0.507122	0.617457
Q9WUK4	Replication factor C subunit 2 OS=Mus musculus OX=10090 GN=Rfc2 PE=1 SV=1	10	13	15	1833.42	1779.95	1724.27	1725.32	1790.76	1759.06	1720.65	1723.45	1768.98	1836.8	1822.03	1863.88	1778.66	1758.18	1737.55	1840.82	1.05943	0.040004	0.118071
Q91YW3	DnaJ homolog subfamily C member 3 OS=Mus musculus OX=10090 GN=Dnajc3 PE=1 SV=1	5	6	8	1121.45	1172.48	1110.54	1266.27	1200.38	1265.45	1267.29	1216.37	1214.63	1067.85	1133.63	1132.24	1134.51	1243.65	1232.53	1110.81	1.11958	0.00311627	0.0231692
Q9CWG8	Protein arginine methyltransferase NDUFAF7, mitochondrial OS=Mus musculus OX=10090 GN=Ndufaf7 PE=1 SV=4	7	4	4	947.472	923.419	952.252	846.546	887.604	860.474	832.724	804.727	839.942	893.988	904.979	868.061	940.963	864.707	825.657	888.874	1.13965	0.000476831	0.00768425
Q9Z2X1	Heterogeneous nuclear ribonucleoprotein F OS=Mus musculus OX=10090 GN=Hnrnpf PE=1 SV=3	9	15	14	1728.31	1637.65	1560.05	1644.86	1780.86	1772.72	1757.86	1772.13	1854.72	1699.09	1639.46	1642.61	1640.57	1731.67	1794.4	1660.16	1.09377	0.071726	0.171281
Q9R1P1	Proteasome subunit beta type-3 OS=Mus musculus OX=10090 GN=Psmb3 PE=1 SV=1	10	11	8	2392.68	2516.6	2713.36	2603.54	2527.28	2339.03	2585.08	2552.87	2315.62	2490.74	2475.29	2704.03	2537.48	2487.43	2481.55	2554.6	1.02944	0.900229	0.922282
P10518	Delta-aminolevulinic acid dehydratase OS=Mus musculus OX=10090 GN=Alad PE=1 SV=1	6	7	10	1256.1	1318.01	1312.45	1380.82	1370.84	1416.69	1436.03	1387.43	1394.15	1306.98	1303.65	1256.64	1295.22	1389.31	1405.71	1288.88	1.09064	0.0016719	0.0159778
Q8QZY1	Eukaryotic translation initiation factor 3 subunit L OS=Mus musculus OX=10090 GN=Eif3l PE=1 SV=1	21	24	20	4203.6	4016	4016.95	3999.54	4139.76	4106.8	4118.93	3999.59	4140.79	4205.45	4372.17	4262.98	4077.91	4081.59	4085.96	4279.64	1.04947	0.0570792	0.149196
Q9Z1J3	Cysteine desulfurase, mitochondrial OS=Mus musculus OX=10090 GN=Nfs1 PE=1 SV=3	5	3	6	421.08	452.582	420.251	412.9	391.527	407.692	424.071	422.835	401.803	417.29	408.397	445.595	431.046	403.936	416.109	423.468	1.06711	0.251442	0.391021
P56380	Bis(5'-nucleosyl)-tetraphosphatase [asymmetrical] OS=Mus musculus OX=10090 GN=Nudt2 PE=1 SV=3	5	5	5	511.702	492.262	490.615	498.378	518.459	511.089	497.521	515.307	522.588	522.269	503.842	505.577	498.102	509.241	511.697	510.496	1.02729	0.467281	0.584913
[truncated: 4,303 more rows]
