# Supplementary material for: Oxidative Stress Induced Dysfunction of Protein Synthesis in 661W Mice Photoreceptor Cells
Source: Proteomes. 2023 Apr 3;11(2):12. doi: 10.3390/proteomes11020012 (PMC10123756; doi:10.3390/proteomes11020012)
Supplement: Supplementary file 1 [file proteomes-11-00012-s001.zip › Deng et al Supplementary Table 2 3Mar2023.xlsx]

## Sheet: TMT1
Protein FDR Confidence	Master	Accession	Description	Exp. q-value	Sum PEP Score	Coverage	# Peptides	# PSMs	# Unique Peptides	# Protein Groups	# AAs	MW [kDa]	calc. pI	Mouse_Cell_661W_TMT_1_HpH_Fract_1.raw	Mouse_Cell_661W_TMT_1_HpH_Fract_10.raw	Mouse_Cell_661W_TMT_1_HpH_Fract_11.raw	Mouse_Cell_661W_TMT_1_HpH_Fract_12.raw	Mouse_Cell_661W_TMT_1_HpH_Fract_13.raw	Mouse_Cell_661W_TMT_1_HpH_Fract_14.raw	Mouse_Cell_661W_TMT_1_HpH_Fract_15.raw	Mouse_Cell_661W_TMT_1_HpH_Fract_16.raw	Mouse_Cell_661W_TMT_1_HpH_Fract_17.raw	Mouse_Cell_661W_TMT_1_HpH_Fract_2.raw	Mouse_Cell_661W_TMT_1_HpH_Fract_3.raw	Mouse_Cell_661W_TMT_1_HpH_Fract_4.raw	Mouse_Cell_661W_TMT_1_HpH_Fract_5.raw	Mouse_Cell_661W_TMT_1_HpH_Fract_6.raw	Mouse_Cell_661W_TMT_1_HpH_Fract_7.raw	Mouse_Cell_661W_TMT_1_HpH_Fract_8.raw	Mouse_Cell_661W_TMT_1_HpH_Fract_9.raw	Found in Sample: [S1] F1: 126, Control	Found in Sample: [S2] F1: 127N, Sample	Found in Sample: [S3] F1: 127C, Sample	Found in Sample: [S4] F1: 128N, Sample	Found in Sample: [S5] F1: 128C, Sample	Found in Sample: [S6] F1: 129N, Sample	Found in Sample: [S7] F1: 129C, Sample	Found in Sample: [S8] F1: 130N, Sample	Found in Sample: [S9] F1: 130C, Sample	Found in Sample: [S10] F1: 131, Sample	Found in Sample Group: F1, 126	Found in Sample Group: F1, 127N	Found in Sample Group: F1, 127C	Found in Sample Group: F1, 128N	Found in Sample Group: F1, 128C	Found in Sample Group: F1, 129N	Found in Sample Group: F1, 129C	Found in Sample Group: F1, 130N	Found in Sample Group: F1, 130C
High	Master Protein	O35945	Aldehyde dehydrogenase, cytosolic 1 OS=Mus musculus OX=10090 GN=Aldh1a7 PE=1 SV=1	0	73.0592	30.3393	12	38	8	1	501	54.553	7.71	High	High	High	Not Found	High	High	Not Found	Not Found	Not Found	High	High	High	Not Found	High	High	High	High	High	High	High	High	High	High	High	High	High	High	High	High	High	High	High	High	High	High	High
Checked	Protein Group ID	# Proteins	# Unique Peptides	# Peptides	# PSMs	Group Description	Mouse_Cell_661W_TMT_1_HpH_Fract_1.raw	Mouse_Cell_661W_TMT_1_HpH_Fract_10.raw	Mouse_Cell_661W_TMT_1_HpH_Fract_11.raw	Mouse_Cell_661W_TMT_1_HpH_Fract_12.raw	Mouse_Cell_661W_TMT_1_HpH_Fract_13.raw	Mouse_Cell_661W_TMT_1_HpH_Fract_14.raw	Mouse_Cell_661W_TMT_1_HpH_Fract_15.raw	Mouse_Cell_661W_TMT_1_HpH_Fract_16.raw	Mouse_Cell_661W_TMT_1_HpH_Fract_17.raw	Mouse_Cell_661W_TMT_1_HpH_Fract_2.raw	Mouse_Cell_661W_TMT_1_HpH_Fract_3.raw	Mouse_Cell_661W_TMT_1_HpH_Fract_4.raw	Mouse_Cell_661W_TMT_1_HpH_Fract_5.raw	Mouse_Cell_661W_TMT_1_HpH_Fract_6.raw	Mouse_Cell_661W_TMT_1_HpH_Fract_7.raw	Mouse_Cell_661W_TMT_1_HpH_Fract_8.raw	Mouse_Cell_661W_TMT_1_HpH_Fract_9.raw	Found in Sample: [S1] F1: 126, Control	Found in Sample: [S2] F1: 127N, Sample	Found in Sample: [S3] F1: 127C, Sample	Found in Sample: [S4] F1: 128N, Sample	Found in Sample: [S5] F1: 128C, Sample	Found in Sample: [S6] F1: 129N, Sample	Found in Sample: [S7] F1: 129C, Sample	Found in Sample: [S8] F1: 130N, Sample	Found in Sample: [S9] F1: 130C, Sample	Found in Sample: [S10] F1: 131, Sample	Found in Sample Group: F1, 126	Found in Sample Group: F1, 127N	Found in Sample Group: F1, 127C	Found in Sample Group: F1, 128N	Found in Sample Group: F1, 128C	Found in Sample Group: F1, 129N	Found in Sample Group: F1, 129C	Found in Sample Group: F1, 130N	Found in Sample Group: F1, 130C	Found in Sample Group: F1, 131
	1	3	8	12	38	[Master Protein] Aldehyde dehydrogenase, cytosolic 1 OS=Mus musculus OX=10090 GN=Aldh1a7 PE=1 SV=1	High	High	High	Not Found	High	High	Not Found	Not Found	Not Found	High	High	High	Not Found	High	High	High	High	High	High	High	High	High	High	High	High	High	High	High	High	High	High	High	High	High	High	High	High
	Checked	Confidence	Sequence	Modifications	Qvality PEP	Qvality q-value	# Protein Groups	# Proteins	# PSMs	Master Protein Accessions	# Missed Cleavages	Theo. MH+ [Da]	Mouse_Cell_661W_TMT_1_HpH_Fract_1.raw	Mouse_Cell_661W_TMT_1_HpH_Fract_10.raw	Mouse_Cell_661W_TMT_1_HpH_Fract_11.raw	Mouse_Cell_661W_TMT_1_HpH_Fract_12.raw	Mouse_Cell_661W_TMT_1_HpH_Fract_13.raw	Mouse_Cell_661W_TMT_1_HpH_Fract_14.raw	Mouse_Cell_661W_TMT_1_HpH_Fract_15.raw	Mouse_Cell_661W_TMT_1_HpH_Fract_16.raw	Mouse_Cell_661W_TMT_1_HpH_Fract_17.raw	Mouse_Cell_661W_TMT_1_HpH_Fract_2.raw	Mouse_Cell_661W_TMT_1_HpH_Fract_3.raw	Mouse_Cell_661W_TMT_1_HpH_Fract_4.raw	Mouse_Cell_661W_TMT_1_HpH_Fract_5.raw	Mouse_Cell_661W_TMT_1_HpH_Fract_6.raw	Mouse_Cell_661W_TMT_1_HpH_Fract_7.raw	Mouse_Cell_661W_TMT_1_HpH_Fract_8.raw	Mouse_Cell_661W_TMT_1_HpH_Fract_9.raw	Found in Sample: [S1] F1: 126, Control	Found in Sample: [S2] F1: 127N, Sample	Found in Sample: [S3] F1: 127C, Sample	Found in Sample: [S4] F1: 128N, Sample	Found in Sample: [S5] F1: 128C, Sample	Found in Sample: [S6] F1: 129N, Sample	Found in Sample: [S7] F1: 129C, Sample	Found in Sample: [S8] F1: 130N, Sample	Found in Sample: [S9] F1: 130C, Sample	Found in Sample: [S10] F1: 131, Sample	Found in Sample Group: F1, 126	Found in Sample Group: F1, 127N	Found in Sample Group: F1, 127C	Found in Sample Group: F1, 128N	Found in Sample Group: F1, 128C	Found in Sample Group: F1, 129N	Found in Sample Group: F1, 129C	Found in Sample Group: F1, 130N	Found in Sample Group: F1, 130C	Found in Sample Group: F1, 131
		High	IFINNEWHDSVSSK	2xTMT6plex [N-Term; K14]	3.81926e-05	0	1	1	1	O35945	0	2134.13	Not Found	Not Found	High	Not Found	Not Found	Not Found	Not Found	Not Found	Not Found	Not Found	Not Found	Not Found	Not Found	Not Found	Not Found	Not Found	Not Found	High	High	High	High	High	High	High	High	High	High	High	High	High	High	High	High	High	High	High	High
		High	ILGLIESGK	2xTMT6plex [N-Term; K9]	3.41143e-05	0	1	1	2	O35945	0	1387.89	Not Found	Not Found	Not Found	Not Found	Not Found	Not Found	Not Found	Not Found	Not Found	Not Found	Not Found	Not Found	Not Found	Not Found	Not Found	High	High	High	High	High	High	High	High	High	High	High	High	High	High	High	High	High	High	High	High	High	High
		High	ELGEHGLYEYTELK	2xTMT6plex [N-Term; K14]	2.06394e-05	0	2	2	1	O35945; P24549	0	2139.14	Not Found	Not Found	Not Found	Not Found	Not Found	Not Found	Not Found	Not Found	Not Found	Not Found	Not Found	Not Found	Not Found	Not Found	Not Found	High	Not Found	High	High	High	High	High	High	High	High	High	High	High	High	High	High	High	High	High	High	High	High
		High	YILGNPLNSGINQGPQIDK	2xTMT6plex [N-Term; K19]	1.24464e-08	0	1	1	1	O35945	0	2499.4	Not Found	Not Found	Not Found	Not Found	Not Found	Not Found	Not Found	Not Found	Not Found	Not Found	Not Found	Not Found	Not Found	High	Not Found	Not Found	Not Found	High	High	High	High	High	High	High	High	High	High	High	High	High	High	High	High	High	High	High	High
		High	IHGQTIPSDGNIFTYTR	1xDeamidated [N11]; 1xTMT6plex [N-Term]	2.27206e-07	0	1	1	2	O35945	0	2150.11	Not Found	Not Found	Not Found	Not Found	Not Found	Not Found	Not Found	Not Found	Not Found	Not Found	Not Found	Not Found	Not Found	Not Found	High	Not Found	Not Found	High	High	High	High	High	High	High	High	High	High	High	High	High	High	High	High	High	High	High	High
		High	IHGQTIPSDGNIFTYTR	1xTMT6plex [N-Term]	2.68491e-06	0	1	1	2	O35945	0	2149.12	Not Found	Not Found	Not Found	Not Found	Not Found	Not Found	Not Found	Not Found	Not Found	Not Found	High	Not Found	Not Found	Not Found	Not Found	Not Found	Not Found	High	High	High	High	High	High	High	High	High	High	High	High	High	High	High	High	High	High	High	High
		High	GFFVQPTVFSNVTDEMR	1xTMT6plex [N-Term]	2.00007e-05	0	2	2	4	O35945; P24549	0	2203.11	Not Found	Not Found	Not Found	Not Found	Not Found	Not Found	Not Found	Not Found	Not Found	High	Not Found	Not Found	Not Found	Not Found	Not Found	Not Found	Not Found	High	High	High	High	High	High	High	High	High	High	High	High	High	High	High	High	High	High	High	High
		High	LFVEESIYDEFVR	1xTMT6plex [N-Term]	8.14116e-05	0	1	1	4	O35945	0	1874.97	Not Found	High	High	Not Found	Not Found	Not Found	Not Found	Not Found	Not Found	Not Found	Not Found	Not Found	Not Found	Not Found	Not Found	Not Found	Not Found	High	High	High	High	High	High	High	High	High	High	High	High	High	High	High	High	High	High	High	High
		High	VSFTGSTEVGK	2xTMT6plex [N-Term; K11]	0.000236693	3.26555e-05	1	1	1	O35945	0	1569.89	Not Found	High	Not Found	Not Found	Not Found	Not Found	Not Found	Not Found	Not Found	Not Found	Not Found	Not Found	Not Found	Not Found	Not Found	Not Found	Not Found	High	High	High	High	High	High	High	High	High	High	High	High	High	High	High	High	High	High	High	High
		High	GFFVQPTVFSNVTDEMR	1xOxidation [M16]; 1xTMT6plex [N-Term]	0.00105366	0.000165895	2	2	8	O35945; P24549	0	2219.1	High	Not Found	Not Found	Not Found	Not Found	Not Found	Not Found	Not Found	Not Found	High	Not Found	Not Found	Not Found	Not Found	Not Found	Not Found	Not Found	High	High	High	High	High	High	High	High	High	High	High	High	High	High	High	High	High	High	High	High
		High	VTLELGGK	2xTMT6plex [N-Term; K8]	0.00285434	0.00040345	3	8	3	O35945; P47738; P24549	0	1274.81	Not Found	Not Found	Not Found	Not Found	Not Found	High	Not Found	Not Found	Not Found	Not Found	Not Found	Not Found	Not Found	Not Found	Not Found	Not Found	Not Found	High	High	High	High	High	High	High	High	High	High	High	High	High	High	High	High	High	High	High	High
		High	EEIFGPVQQIMK	1xOxidation [M11]; 2xTMT6plex [N-Term; K12]	0.00564701	0.000560225	2	2	2	O35945; P24549	0	1893.06	Not Found	Not Found	Not Found	Not Found	Not Found	Not Found	Not Found	Not Found	Not Found	Not Found	Not Found	Not Found	Not Found	Not Found	Not Found	Not Found	High	High	High	High	High	High	High	High	High	High	High	High	High	High	High	High	High	High	High	High	High
		High	EEIFGPVQQIMK	1xDeamidated [Q]; 2xTMT6plex [N-Term; K12]	0.010665	0.001067	2	2	4	O35945; P24549	0	1878.04	Not Found	Not Found	Not Found	Not Found	High	Not Found	Not Found	Not Found	Not Found	Not Found	Not Found	Not Found	Not Found	Not Found	Not Found	Not Found	Not Found	High	High	High	High	High	High	High	High	High	High	High	High	High	High	High	High	High	High	High	High
		High	YILGNPLNSGINQGPQIDKEQHNK	3xTMT6plex [N-Term; K19; K24]	0.0108259	0.001067	1	1	1	O35945	1	3364.86	Not Found	Not Found	Not Found	Not Found	Not Found	Not Found	Not Found	Not Found	Not Found	Not Found	Not Found	High	Not Found	Not Found	Not Found	Not Found	Not Found	High	High	High	High	High	High	High	High	High	High	High	High	High	High	High	High	High	High	High	High
		High	LLLATMESMNAGK	2xTMT6plex [N-Term; K13]	0.0280567	0.00257589	1	1	2	O35945	0	1837.03	Not Found	Not Found	Not Found	Not Found	High	Not Found	Not Found	Not Found	Not Found	Not Found	Not Found	Not Found	Not Found	Not Found	Not Found	Not Found	Not Found	High	High	High	High	High	High	High	High	High	High	High	High	High	High	High	High	High	High	High	High
High	Master Protein	Q9CQF3	Cleavage and polyadenylation specificity factor subunit 5 OS=Mus musculus OX=10090 GN=Nudt21 PE=1 SV=1	0	25.6687	23.7885	5	8	5	1	227	26.224	8.82	Not Found	High	Not Found	High	High	Not Found	Not Found	Not Found	Not Found	High	Not Found	Not Found	Not Found	Not Found	High	Not Found	Not Found	High	High	High	High	High	High	High	High	High	High	High	High	High	High	High	High	High	High	High
Checked	Protein Group ID	# Proteins	# Unique Peptides	# Peptides	# PSMs	Group Description	Mouse_Cell_661W_TMT_1_HpH_Fract_1.raw	Mouse_Cell_661W_TMT_1_HpH_Fract_10.raw	Mouse_Cell_661W_TMT_1_HpH_Fract_11.raw	Mouse_Cell_661W_TMT_1_HpH_Fract_12.raw	Mouse_Cell_661W_TMT_1_HpH_Fract_13.raw	Mouse_Cell_661W_TMT_1_HpH_Fract_14.raw	Mouse_Cell_661W_TMT_1_HpH_Fract_15.raw	Mouse_Cell_661W_TMT_1_HpH_Fract_16.raw	Mouse_Cell_661W_TMT_1_HpH_Fract_17.raw	Mouse_Cell_661W_TMT_1_HpH_Fract_2.raw	Mouse_Cell_661W_TMT_1_HpH_Fract_3.raw	Mouse_Cell_661W_TMT_1_HpH_Fract_4.raw	Mouse_Cell_661W_TMT_1_HpH_Fract_5.raw	Mouse_Cell_661W_TMT_1_HpH_Fract_6.raw	Mouse_Cell_661W_TMT_1_HpH_Fract_7.raw	Mouse_Cell_661W_TMT_1_HpH_Fract_8.raw	Mouse_Cell_661W_TMT_1_HpH_Fract_9.raw	Found in Sample: [S1] F1: 126, Control	Found in Sample: [S2] F1: 127N, Sample	Found in Sample: [S3] F1: 127C, Sample	Found in Sample: [S4] F1: 128N, Sample	Found in Sample: [S5] F1: 128C, Sample	Found in Sample: [S6] F1: 129N, Sample	Found in Sample: [S7] F1: 129C, Sample	Found in Sample: [S8] F1: 130N, Sample	Found in Sample: [S9] F1: 130C, Sample	Found in Sample: [S10] F1: 131, Sample	Found in Sample Group: F1, 126	Found in Sample Group: F1, 127N	Found in Sample Group: F1, 127C	Found in Sample Group: F1, 128N	Found in Sample Group: F1, 128C	Found in Sample Group: F1, 129N	Found in Sample Group: F1, 129C	Found in Sample Group: F1, 130N	Found in Sample Group: F1, 130C	Found in Sample Group: F1, 131
	3650	4	5	5	8	[Master Protein] Cleavage and polyadenylation specificity factor subunit 5 OS=Mus musculus OX=10090 GN=Nudt21 PE=1 SV=1	Not Found	High	Not Found	High	High	Not Found	Not Found	Not Found	Not Found	High	Not Found	Not Found	Not Found	Not Found	High	Not Found	Not Found	High	High	High	High	High	High	High	High	High	High	High	High	High	High	High	High	High	High	High	High
	Checked	Confidence	Sequence	Modifications	Qvality PEP	Qvality q-value	# Protein Groups	# Proteins	# PSMs	Master Protein Accessions	# Missed Cleavages	Theo. MH+ [Da]	Mouse_Cell_661W_TMT_1_HpH_Fract_1.raw	Mouse_Cell_661W_TMT_1_HpH_Fract_10.raw	Mouse_Cell_661W_TMT_1_HpH_Fract_11.raw	Mouse_Cell_661W_TMT_1_HpH_Fract_12.raw	Mouse_Cell_661W_TMT_1_HpH_Fract_13.raw	Mouse_Cell_661W_TMT_1_HpH_Fract_14.raw	Mouse_Cell_661W_TMT_1_HpH_Fract_15.raw	Mouse_Cell_661W_TMT_1_HpH_Fract_16.raw	Mouse_Cell_661W_TMT_1_HpH_Fract_17.raw	Mouse_Cell_661W_TMT_1_HpH_Fract_2.raw	Mouse_Cell_661W_TMT_1_HpH_Fract_3.raw	Mouse_Cell_661W_TMT_1_HpH_Fract_4.raw	Mouse_Cell_661W_TMT_1_HpH_Fract_5.raw	Mouse_Cell_661W_TMT_1_HpH_Fract_6.raw	Mouse_Cell_661W_TMT_1_HpH_Fract_7.raw	Mouse_Cell_661W_TMT_1_HpH_Fract_8.raw	Mouse_Cell_661W_TMT_1_HpH_Fract_9.raw	Found in Sample: [S1] F1: 126, Control	Found in Sample: [S2] F1: 127N, Sample	Found in Sample: [S3] F1: 127C, Sample	Found in Sample: [S4] F1: 128N, Sample	Found in Sample: [S5] F1: 128C, Sample	Found in Sample: [S6] F1: 129N, Sample	Found in Sample: [S7] F1: 129C, Sample	Found in Sample: [S8] F1: 130N, Sample	Found in Sample: [S9] F1: 130C, Sample	Found in Sample: [S10] F1: 131, Sample	Found in Sample Group: F1, 126	Found in Sample Group: F1, 127N	Found in Sample Group: F1, 127C	Found in Sample Group: F1, 128N	Found in Sample Group: F1, 128C	Found in Sample Group: F1, 129N	Found in Sample Group: F1, 129C	Found in Sample Group: F1, 130N	Found in Sample Group: F1, 130C	Found in Sample Group: F1, 131
		High	LFLVQLQEK	2xTMT6plex [N-Term; K9]	1.83154e-05	0	1	4	1	Q9CQF3	0	1575.99	Not Found	Not Found	Not Found	High	Not Found	Not Found	Not Found	Not Found	Not Found	Not Found	Not Found	Not Found	Not Found	Not Found	Not Found	Not Found	Not Found	High	High	High	High	High	High	High	High	High	High	High	High	High	High	High	High	High	High	High	High
		High	LPGGELNPGEDEVEGLKR	2xTMT6plex [N-Term; K17]	2.60984e-07	0	1	3	1	Q9CQF3	1	2367.29	Not Found	Not Found	Not Found	Not Found	Not Found	Not Found	Not Found	Not Found	Not Found	Not Found	Not Found	Not Found	Not Found	Not Found	High	Not Found	Not Found	High	High	High	High	High	High	High	High	High	High	High	High	High	High	High	High	High	High	High	High
		High	TVEGVLIVHEHR	1xTMT6plex [N-Term]	0.000141444	0	1	3	2	Q9CQF3	0	1617.93	Not Found	Not Found	Not Found	Not Found	Not Found	Not Found	Not Found	Not Found	Not Found	High	Not Found	Not Found	Not Found	Not Found	Not Found	Not Found	Not Found	Not Found	High	High	Not Found	High	High	High	Not Found	Not Found	Not Found	Not Found	High	High	Not Found	High	High	High	Not Found	Not Found	Not Found
		High	TINLYPLTNYTFGTK	2xTMT6plex [N-Term; K15]	0.000466849	9.38446e-05	1	1	1	Q9CQF3	0	2204.24	Not Found	Not Found	Not Found	Not Found	High	Not Found	Not Found	Not Found	Not Found	Not Found	Not Found	Not Found	Not Found	Not Found	Not Found	Not Found	Not Found	High	High	High	High	High	High	High	High	High	High	High	High	High	High	High	High	High	High	High	High
		High	TINLYPLTNYTFGTK	1xDeamidated [N9]; 2xTMT6plex [N-Term; K15]	0.00150422	0.000282382	1	1	1	Q9CQF3	0	2205.22	Not Found	Not Found	Not Found	Not Found	High	Not Found	Not Found	Not Found	Not Found	Not Found	Not Found	Not Found	Not Found	Not Found	Not Found	Not Found	Not Found	High	High	High	High	High	High	High	High	High	High	High	High	High	High	High	High	High	High	High	High
		High	LPGGELNPGEDEVEGLK	1xTMT6plex [N-Term]	0.0022365	0.000349957	1	3	2	Q9CQF3	0	1982.03	Not Found	High	Not Found	Not Found	Not Found	Not Found	Not Found	Not Found	Not Found	Not Found	Not Found	Not Found	Not Found	Not Found	Not Found	Not Found	Not Found	High	High	High	High	High	High	High	High	High	High	High	High	High	High	High	High	High	High	High	High
High	Master Protein	Q8K330	Protein phosphatase Slingshot homolog 3 OS=Mus musculus OX=10090 GN=Ssh3 PE=1 SV=1	0.00137162	5.85836	3.85208	2	8	2	1	649	72.182	5.57	Not Found	Not Found	Not Found	Not Found	Not Found	Not Found	Not Found	Not Found	Not Found	Not Found	Not Found	Not Found	Not Found	Not Found	Not Found	High	Not Found	High	High	High	High	High	High	High	High	High	High	High	High	High	High	High	High	High	High	High
Checked	Protein Group ID	# Proteins	# Unique Peptides	# Peptides	# PSMs	Group Description	Mouse_Cell_661W_TMT_1_HpH_Fract_1.raw	Mouse_Cell_661W_TMT_1_HpH_Fract_10.raw	Mouse_Cell_661W_TMT_1_HpH_Fract_11.raw	Mouse_Cell_661W_TMT_1_HpH_Fract_12.raw	Mouse_Cell_661W_TMT_1_HpH_Fract_13.raw	Mouse_Cell_661W_TMT_1_HpH_Fract_14.raw	Mouse_Cell_661W_TMT_1_HpH_Fract_15.raw	Mouse_Cell_661W_TMT_1_HpH_Fract_16.raw	Mouse_Cell_661W_TMT_1_HpH_Fract_17.raw	Mouse_Cell_661W_TMT_1_HpH_Fract_2.raw	Mouse_Cell_661W_TMT_1_HpH_Fract_3.raw	Mouse_Cell_661W_TMT_1_HpH_Fract_4.raw	Mouse_Cell_661W_TMT_1_HpH_Fract_5.raw	Mouse_Cell_661W_TMT_1_HpH_Fract_6.raw	Mouse_Cell_661W_TMT_1_HpH_Fract_7.raw	Mouse_Cell_661W_TMT_1_HpH_Fract_8.raw	Mouse_Cell_661W_TMT_1_HpH_Fract_9.raw	Found in Sample: [S1] F1: 126, Control	Found in Sample: [S2] F1: 127N, Sample	Found in Sample: [S3] F1: 127C, Sample	Found in Sample: [S4] F1: 128N, Sample	Found in Sample: [S5] F1: 128C, Sample	Found in Sample: [S6] F1: 129N, Sample	Found in Sample: [S7] F1: 129C, Sample	Found in Sample: [S8] F1: 130N, Sample	Found in Sample: [S9] F1: 130C, Sample	Found in Sample: [S10] F1: 131, Sample	Found in Sample Group: F1, 126	Found in Sample Group: F1, 127N	Found in Sample Group: F1, 127C	Found in Sample Group: F1, 128N	Found in Sample Group: F1, 128C	Found in Sample Group: F1, 129N	Found in Sample Group: F1, 129C	Found in Sample Group: F1, 130N	Found in Sample Group: F1, 130C	Found in Sample Group: F1, 131
	3649	2	2	2	8	[Master Protein] Protein phosphatase Slingshot homolog 3 OS=Mus musculus OX=10090 GN=Ssh3 PE=1 SV=1	Not Found	Not Found	Not Found	Not Found	Not Found	Not Found	Not Found	Not Found	Not Found	Not Found	Not Found	Not Found	Not Found	Not Found	Not Found	High	Not Found	High	High	High	High	High	High	High	High	High	High	High	High	High	High	High	High	High	High	High	High
	Checked	Confidence	Sequence	Modifications	Qvality PEP	Qvality q-value	# Protein Groups	# Proteins	# PSMs	Master Protein Accessions	# Missed Cleavages	Theo. MH+ [Da]	Mouse_Cell_661W_TMT_1_HpH_Fract_1.raw	Mouse_Cell_661W_TMT_1_HpH_Fract_10.raw	Mouse_Cell_661W_TMT_1_HpH_Fract_11.raw	Mouse_Cell_661W_TMT_1_HpH_Fract_12.raw	Mouse_Cell_661W_TMT_1_HpH_Fract_13.raw	Mouse_Cell_661W_TMT_1_HpH_Fract_14.raw	Mouse_Cell_661W_TMT_1_HpH_Fract_15.raw	Mouse_Cell_661W_TMT_1_HpH_Fract_16.raw	Mouse_Cell_661W_TMT_1_HpH_Fract_17.raw	Mouse_Cell_661W_TMT_1_HpH_Fract_2.raw	Mouse_Cell_661W_TMT_1_HpH_Fract_3.raw	Mouse_Cell_661W_TMT_1_HpH_Fract_4.raw	Mouse_Cell_661W_TMT_1_HpH_Fract_5.raw	Mouse_Cell_661W_TMT_1_HpH_Fract_6.raw	Mouse_Cell_661W_TMT_1_HpH_Fract_7.raw	Mouse_Cell_661W_TMT_1_HpH_Fract_8.raw	Mouse_Cell_661W_TMT_1_HpH_Fract_9.raw	Found in Sample: [S1] F1: 126, Control	Found in Sample: [S2] F1: 127N, Sample	Found in Sample: [S3] F1: 127C, Sample	Found in Sample: [S4] F1: 128N, Sample	Found in Sample: [S5] F1: 128C, Sample	Found in Sample: [S6] F1: 129N, Sample	Found in Sample: [S7] F1: 129C, Sample	Found in Sample: [S8] F1: 130N, Sample	Found in Sample: [S9] F1: 130C, Sample	Found in Sample: [S10] F1: 131, Sample	Found in Sample Group: F1, 126	Found in Sample Group: F1, 127N	Found in Sample Group: F1, 127C	Found in Sample Group: F1, 128N	Found in Sample Group: F1, 128C	Found in Sample Group: F1, 129N	Found in Sample Group: F1, 129C	Found in Sample Group: F1, 130N	Found in Sample Group: F1, 130C	Found in Sample Group: F1, 131
		High	EIDNFFPER	1xTMT6plex [N-Term]	0.00292998	0.00040345	1	2	2	Q8K330	0	1395.71	Not Found	Not Found	Not Found	Not Found	Not Found	Not Found	Not Found	Not Found	Not Found	Not Found	Not Found	Not Found	Not Found	Not Found	Not Found	High	Not Found	High	High	High	High	High	High	High	High	High	High	High	High	High	High	High	High	High	High	High	High
		High	DFIDNQMLLLMAQQDR	1xDeamidated [Q/N]; 1xTMT6plex [N-Term]	0.00515085	0.000519722	1	2	6	Q8K330	0	2181.09	Not Found	Not Found	Not Found	Not Found	Not Found	Not Found	Not Found	Not Found	Not Found	Not Found	Not Found	Not Found	Not Found	Not Found	Not Found	High	Not Found	High	High	High	High	High	High	High	High	High	High	High	High	High	High	High	High	High	High	High	High
High	Master Protein	Q9QYI5	DnaJ homolog subfamily B member 2 OS=Mus musculus OX=10090 GN=Dnajb2 PE=1 SV=3	0.00442541	3.41139	3.7037	1	1	1	1	324	35.572	5.91	Not Found	Not Found	Not Found	Not Found	Not Found	Not Found	Not Found	Not Found	Not Found	Not Found	High	Not Found	Not Found	Not Found	Not Found	Not Found	Not Found	High	High	High	High	High	High	High	High	High	High	High	High	High	High	High	High	High	High	High
Checked	Protein Group ID	# Proteins	# Unique Peptides	# Peptides	# PSMs	Group Description	Mouse_Cell_661W_TMT_1_HpH_Fract_1.raw	Mouse_Cell_661W_TMT_1_HpH_Fract_10.raw	Mouse_Cell_661W_TMT_1_HpH_Fract_11.raw	Mouse_Cell_661W_TMT_1_HpH_Fract_12.raw	Mouse_Cell_661W_TMT_1_HpH_Fract_13.raw	Mouse_Cell_661W_TMT_1_HpH_Fract_14.raw	Mouse_Cell_661W_TMT_1_HpH_Fract_15.raw	Mouse_Cell_661W_TMT_1_HpH_Fract_16.raw	Mouse_Cell_661W_TMT_1_HpH_Fract_17.raw	Mouse_Cell_661W_TMT_1_HpH_Fract_2.raw	Mouse_Cell_661W_TMT_1_HpH_Fract_3.raw	Mouse_Cell_661W_TMT_1_HpH_Fract_4.raw	Mouse_Cell_661W_TMT_1_HpH_Fract_5.raw	Mouse_Cell_661W_TMT_1_HpH_Fract_6.raw	Mouse_Cell_661W_TMT_1_HpH_Fract_7.raw	Mouse_Cell_661W_TMT_1_HpH_Fract_8.raw	Mouse_Cell_661W_TMT_1_HpH_Fract_9.raw	Found in Sample: [S1] F1: 126, Control	Found in Sample: [S2] F1: 127N, Sample	Found in Sample: [S3] F1: 127C, Sample	Found in Sample: [S4] F1: 128N, Sample	Found in Sample: [S5] F1: 128C, Sample	Found in Sample: [S6] F1: 129N, Sample	Found in Sample: [S7] F1: 129C, Sample	Found in Sample: [S8] F1: 130N, Sample	Found in Sample: [S9] F1: 130C, Sample	Found in Sample: [S10] F1: 131, Sample	Found in Sample Group: F1, 126	Found in Sample Group: F1, 127N	Found in Sample Group: F1, 127C	Found in Sample Group: F1, 128N	Found in Sample Group: F1, 128C	Found in Sample Group: F1, 129N	Found in Sample Group: F1, 129C	Found in Sample Group: F1, 130N	Found in Sample Group: F1, 130C	Found in Sample Group: F1, 131
	3647	3	1	1	1	[Master Protein] DnaJ homolog subfamily B member 2 OS=Mus musculus OX=10090 GN=Dnajb2 PE=1 SV=3	Not Found	Not Found	Not Found	Not Found	Not Found	Not Found	Not Found	Not Found	Not Found	Not Found	High	Not Found	Not Found	Not Found	Not Found	Not Found	Not Found	High	High	High	High	High	High	High	High	High	High	High	High	High	High	High	High	High	High	High	High
	Checked	Confidence	Sequence	Modifications	Qvality PEP	Qvality q-value	# Protein Groups	# Proteins	# PSMs	Master Protein Accessions	# Missed Cleavages	Theo. MH+ [Da]	Mouse_Cell_661W_TMT_1_HpH_Fract_1.raw	Mouse_Cell_661W_TMT_1_HpH_Fract_10.raw	Mouse_Cell_661W_TMT_1_HpH_Fract_11.raw	Mouse_Cell_661W_TMT_1_HpH_Fract_12.raw	Mouse_Cell_661W_TMT_1_HpH_Fract_13.raw	Mouse_Cell_661W_TMT_1_HpH_Fract_14.raw	Mouse_Cell_661W_TMT_1_HpH_Fract_15.raw	Mouse_Cell_661W_TMT_1_HpH_Fract_16.raw	Mouse_Cell_661W_TMT_1_HpH_Fract_17.raw	Mouse_Cell_661W_TMT_1_HpH_Fract_2.raw	Mouse_Cell_661W_TMT_1_HpH_Fract_3.raw	Mouse_Cell_661W_TMT_1_HpH_Fract_4.raw	Mouse_Cell_661W_TMT_1_HpH_Fract_5.raw	Mouse_Cell_661W_TMT_1_HpH_Fract_6.raw	Mouse_Cell_661W_TMT_1_HpH_Fract_7.raw	Mouse_Cell_661W_TMT_1_HpH_Fract_8.raw	Mouse_Cell_661W_TMT_1_HpH_Fract_9.raw	Found in Sample: [S1] F1: 126, Control	Found in Sample: [S2] F1: 127N, Sample	Found in Sample: [S3] F1: 127C, Sample	Found in Sample: [S4] F1: 128N, Sample	Found in Sample: [S5] F1: 128C, Sample	Found in Sample: [S6] F1: 129N, Sample	Found in Sample: [S7] F1: 129C, Sample	Found in Sample: [S8] F1: 130N, Sample	Found in Sample: [S9] F1: 130C, Sample	Found in Sample: [S10] F1: 131, Sample	Found in Sample Group: F1, 126	Found in Sample Group: F1, 127N	Found in Sample Group: F1, 127C	Found in Sample Group: F1, 128N	Found in Sample Group: F1, 128C	Found in Sample Group: F1, 129N	Found in Sample Group: F1, 129C	Found in Sample Group: F1, 130N	Found in Sample Group: F1, 130C	Found in Sample Group: F1, 131
		High	EVAEAYEVLSDK	2xTMT6plex [N-Term; K12]	0.000609839	0.000139833	1	3	1	Q9QYI5	0	1810.98	Not Found	Not Found	Not Found	Not Found	Not Found	Not Found	Not Found	Not Found	Not Found	Not Found	High	Not Found	Not Found	Not Found	Not Found	Not Found	Not Found	High	High	High	High	High	High	High	High	High	High	High	High	High	High	High	High	High	High	High	High
High	Master Protein	O88522	NF-kappa-B essential modulator OS=Mus musculus OX=10090 GN=Ikbkg PE=1 SV=2	0	18.7942	11.8932	5	10	5	1	412	47.942	5.85	High	Not Found	High	Not Found	Not Found	Not Found	Not Found	Not Found	Not Found	Not Found	Not Found	Not Found	High	Not Found	High	Not Found	Not Found	High	High	High	High	High	High	High	High	High	High	High	High	High	High	High	High	High	High	High
Checked	Protein Group ID	# Proteins	# Unique Peptides	# Peptides	# PSMs	Group Description	Mouse_Cell_661W_TMT_1_HpH_Fract_1.raw	Mouse_Cell_661W_TMT_1_HpH_Fract_10.raw	Mouse_Cell_661W_TMT_1_HpH_Fract_11.raw	Mouse_Cell_661W_TMT_1_HpH_Fract_12.raw	Mouse_Cell_661W_TMT_1_HpH_Fract_13.raw	Mouse_Cell_661W_TMT_1_HpH_Fract_14.raw	Mouse_Cell_661W_TMT_1_HpH_Fract_15.raw	Mouse_Cell_661W_TMT_1_HpH_Fract_16.raw	Mouse_Cell_661W_TMT_1_HpH_Fract_17.raw	Mouse_Cell_661W_TMT_1_HpH_Fract_2.raw	Mouse_Cell_661W_TMT_1_HpH_Fract_3.raw	Mouse_Cell_661W_TMT_1_HpH_Fract_4.raw	Mouse_Cell_661W_TMT_1_HpH_Fract_5.raw	Mouse_Cell_661W_TMT_1_HpH_Fract_6.raw	Mouse_Cell_661W_TMT_1_HpH_Fract_7.raw	Mouse_Cell_661W_TMT_1_HpH_Fract_8.raw	Mouse_Cell_661W_TMT_1_HpH_Fract_9.raw	Found in Sample: [S1] F1: 126, Control	Found in Sample: [S2] F1: 127N, Sample	Found in Sample: [S3] F1: 127C, Sample	Found in Sample: [S4] F1: 128N, Sample	Found in Sample: [S5] F1: 128C, Sample	Found in Sample: [S6] F1: 129N, Sample	Found in Sample: [S7] F1: 129C, Sample	Found in Sample: [S8] F1: 130N, Sample	Found in Sample: [S9] F1: 130C, Sample	Found in Sample: [S10] F1: 131, Sample	Found in Sample Group: F1, 126	Found in Sample Group: F1, 127N	Found in Sample Group: F1, 127C	Found in Sample Group: F1, 128N	Found in Sample Group: F1, 128C	Found in Sample Group: F1, 129N	Found in Sample Group: F1, 129C	Found in Sample Group: F1, 130N	Found in Sample Group: F1, 130C	Found in Sample Group: F1, 131
	3646	8	5	5	10	[Master Protein] NF-kappa-B essential modulator OS=Mus musculus OX=10090 GN=Ikbkg PE=1 SV=2	High	Not Found	High	Not Found	Not Found	Not Found	Not Found	Not Found	Not Found	Not Found	Not Found	Not Found	High	Not Found	High	Not Found	Not Found	High	High	High	High	High	High	High	High	High	High	High	High	High	High	High	High	High	High	High	High
	Checked	Confidence	Sequence	Modifications	Qvality PEP	Qvality q-value	# Protein Groups	# Proteins	# PSMs	Master Protein Accessions	# Missed Cleavages	Theo. MH+ [Da]	Mouse_Cell_661W_TMT_1_HpH_Fract_1.raw	Mouse_Cell_661W_TMT_1_HpH_Fract_10.raw	Mouse_Cell_661W_TMT_1_HpH_Fract_11.raw	Mouse_Cell_661W_TMT_1_HpH_Fract_12.raw	Mouse_Cell_661W_TMT_1_HpH_Fract_13.raw	Mouse_Cell_661W_TMT_1_HpH_Fract_14.raw	Mouse_Cell_661W_TMT_1_HpH_Fract_15.raw	Mouse_Cell_661W_TMT_1_HpH_Fract_16.raw	Mouse_Cell_661W_TMT_1_HpH_Fract_17.raw	Mouse_Cell_661W_TMT_1_HpH_Fract_2.raw	Mouse_Cell_661W_TMT_1_HpH_Fract_3.raw	Mouse_Cell_661W_TMT_1_HpH_Fract_4.raw	Mouse_Cell_661W_TMT_1_HpH_Fract_5.raw	Mouse_Cell_661W_TMT_1_HpH_Fract_6.raw	Mouse_Cell_661W_TMT_1_HpH_Fract_7.raw	Mouse_Cell_661W_TMT_1_HpH_Fract_8.raw	Mouse_Cell_661W_TMT_1_HpH_Fract_9.raw	Found in Sample: [S1] F1: 126, Control	Found in Sample: [S2] F1: 127N, Sample	Found in Sample: [S3] F1: 127C, Sample	Found in Sample: [S4] F1: 128N, Sample	Found in Sample: [S5] F1: 128C, Sample	Found in Sample: [S6] F1: 129N, Sample	Found in Sample: [S7] F1: 129C, Sample	Found in Sample: [S8] F1: 130N, Sample	Found in Sample: [S9] F1: 130C, Sample	Found in Sample: [S10] F1: 131, Sample	Found in Sample Group: F1, 126	Found in Sample Group: F1, 127N	Found in Sample Group: F1, 127C	Found in Sample Group: F1, 128N	Found in Sample Group: F1, 128C	Found in Sample Group: F1, 129N	Found in Sample Group: F1, 129C	Found in Sample Group: F1, 130N	Found in Sample Group: F1, 130C	Found in Sample Group: F1, 131
		High	AQVTSLLGELQESQSR	1xTMT6plex [N-Term]	8.53104e-07	0	1	8	2	O88522	0	1975.07	Not Found	Not Found	High	Not Found	Not Found	Not Found	Not Found	Not Found	Not Found	Not Found	Not Found	Not Found	Not Found	Not Found	Not Found	Not Found	Not Found	High	High	High	High	High	High	High	High	High	High	High	High	High	High	High	High	High	High	High	High
		High	CQQQMAEDK	1xCarbamidomethyl [C1]; 2xTMT6plex [N-Term; K9]	0.000260833	3.26555e-05	1	6	1	O88522	0	1595.79	High	Not Found	Not Found	Not Found	Not Found	Not Found	Not Found	Not Found	Not Found	Not Found	Not Found	Not Found	Not Found	Not Found	Not Found	Not Found	Not Found	High	High	High	High	High	High	High	High	High	High	High	High	High	High	High	High	High	High	High	High
		High	AQVTSLLGELQESQSR	1xDeamidated [Q11]; 1xTMT6plex [N-Term]	0.0052609	0.000519722	1	8	2	O88522	0	1976.05	Not Found	Not Found	High	Not Found	Not Found	Not Found	Not Found	Not Found	Not Found	Not Found	Not Found	Not Found	Not Found	Not Found	Not Found	Not Found	Not Found	High	High	High	High	High	High	High	High	High	High	High	High	High	High	High	High	High	High	High	High
		High	IVMETVPVLK	2xTMT6plex [N-Term; K10]	0.0111554	0.00112456	1	5	2	O88522	0	1587	Not Found	Not Found	Not Found	Not Found	Not Found	Not Found	Not Found	Not Found	Not Found	Not Found	Not Found	Not Found	Not Found	Not Found	High	Not Found	Not Found	High	High	High	High	High	High	High	High	High	High	High	High	High	High	High	High	High	High	High	High
		High	AQADIYK	2xTMT6plex [N-Term; K7]	0.018286	0.00178521	1	5	1	O88522	0	1266.75	High	Not Found	Not Found	Not Found	Not Found	Not Found	Not Found	Not Found	Not Found	Not Found	Not Found	Not Found	Not Found	Not Found	Not Found	Not Found	Not Found	High	High	High	High	High	High	High	High	High	High	High	High	High	High	High	High	High	High	High	High
		High	AVSEQVR	1xTMT6plex [N-Term]	0.0361517	0.00328193	1	8	2	O88522	0	1017.59	Not Found	Not Found	Not Found	Not Found	Not Found	Not Found	Not Found	Not Found	Not Found	Not Found	Not Found	Not Found	High	Not Found	Not Found	Not Found	Not Found	High	High	High	High	High	High	High	High	High	High	High	High	High	High	High	High	High	High	High	High
High	Master Protein	Q8C0L9	Glycerophosphocholine phosphodiesterase GPCPD1 OS=Mus musculus OX=10090 GN=Gpcpd1 PE=1 SV=1	0.00149278	5.41488	2.96296	1	1	1	1	675	76.531	5.58	Not Found	Not Found	Not Found	Not Found	Not Found	Not Found	Not Found	Not Found	Not Found	High	Not Found	Not Found	Not Found	Not Found	Not Found	Not Found	Not Found	High	High	High	High	High	High	High	High	High	High	High	High	High	High	High	High	High	High	High
Checked	Protein Group ID	# Proteins	# Unique Peptides	# Peptides	# PSMs	Group Description	Mouse_Cell_661W_TMT_1_HpH_Fract_1.raw	Mouse_Cell_661W_TMT_1_HpH_Fract_10.raw	Mouse_Cell_661W_TMT_1_HpH_Fract_11.raw	Mouse_Cell_661W_TMT_1_HpH_Fract_12.raw	Mouse_Cell_661W_TMT_1_HpH_Fract_13.raw	Mouse_Cell_661W_TMT_1_HpH_Fract_14.raw	Mouse_Cell_661W_TMT_1_HpH_Fract_15.raw	Mouse_Cell_661W_TMT_1_HpH_Fract_16.raw	Mouse_Cell_661W_TMT_1_HpH_Fract_17.raw	Mouse_Cell_661W_TMT_1_HpH_Fract_2.raw	Mouse_Cell_661W_TMT_1_HpH_Fract_3.raw	Mouse_Cell_661W_TMT_1_HpH_Fract_4.raw	Mouse_Cell_661W_TMT_1_HpH_Fract_5.raw	Mouse_Cell_661W_TMT_1_HpH_Fract_6.raw	Mouse_Cell_661W_TMT_1_HpH_Fract_7.raw	Mouse_Cell_661W_TMT_1_HpH_Fract_8.raw	Mouse_Cell_661W_TMT_1_HpH_Fract_9.raw	Found in Sample: [S1] F1: 126, Control	Found in Sample: [S2] F1: 127N, Sample	Found in Sample: [S3] F1: 127C, Sample	Found in Sample: [S4] F1: 128N, Sample	Found in Sample: [S5] F1: 128C, Sample	Found in Sample: [S6] F1: 129N, Sample	Found in Sample: [S7] F1: 129C, Sample	Found in Sample: [S8] F1: 130N, Sample	Found in Sample: [S9] F1: 130C, Sample	Found in Sample: [S10] F1: 131, Sample	Found in Sample Group: F1, 126	Found in Sample Group: F1, 127N	Found in Sample Group: F1, 127C	Found in Sample Group: F1, 128N	Found in Sample Group: F1, 128C	Found in Sample Group: F1, 129N	Found in Sample Group: F1, 129C	Found in Sample Group: F1, 130N	Found in Sample Group: F1, 130C	Found in Sample Group: F1, 131
	3645	3	1	1	1	[Master Protein] Glycerophosphocholine phosphodiesterase GPCPD1 OS=Mus musculus OX=10090 GN=Gpcpd1 PE=1 SV=1	Not Found	Not Found	Not Found	Not Found	Not Found	Not Found	Not Found	Not Found	Not Found	High	Not Found	Not Found	Not Found	Not Found	Not Found	Not Found	Not Found	High	High	High	High	High	High	High	High	High	High	High	High	High	High	High	High	High	High	High	High
	Checked	Confidence	Sequence	Modifications	Qvality PEP	Qvality q-value	# Protein Groups	# Proteins	# PSMs	Master Protein Accessions	# Missed Cleavages	Theo. MH+ [Da]	Mouse_Cell_661W_TMT_1_HpH_Fract_1.raw	Mouse_Cell_661W_TMT_1_HpH_Fract_10.raw	Mouse_Cell_661W_TMT_1_HpH_Fract_11.raw	Mouse_Cell_661W_TMT_1_HpH_Fract_12.raw	Mouse_Cell_661W_TMT_1_HpH_Fract_13.raw	Mouse_Cell_661W_TMT_1_HpH_Fract_14.raw	Mouse_Cell_661W_TMT_1_HpH_Fract_15.raw	Mouse_Cell_661W_TMT_1_HpH_Fract_16.raw	Mouse_Cell_661W_TMT_1_HpH_Fract_17.raw	Mouse_Cell_661W_TMT_1_HpH_Fract_2.raw	Mouse_Cell_661W_TMT_1_HpH_Fract_3.raw	Mouse_Cell_661W_TMT_1_HpH_Fract_4.raw	Mouse_Cell_661W_TMT_1_HpH_Fract_5.raw	Mouse_Cell_661W_TMT_1_HpH_Fract_6.raw	Mouse_Cell_661W_TMT_1_HpH_Fract_7.raw	Mouse_Cell_661W_TMT_1_HpH_Fract_8.raw	Mouse_Cell_661W_TMT_1_HpH_Fract_9.raw	Found in Sample: [S1] F1: 126, Control	Found in Sample: [S2] F1: 127N, Sample	Found in Sample: [S3] F1: 127C, Sample	Found in Sample: [S4] F1: 128N, Sample	Found in Sample: [S5] F1: 128C, Sample	Found in Sample: [S6] F1: 129N, Sample	Found in Sample: [S7] F1: 129C, Sample	Found in Sample: [S8] F1: 130N, Sample	Found in Sample: [S9] F1: 130C, Sample	Found in Sample: [S10] F1: 131, Sample	Found in Sample Group: F1, 126	Found in Sample Group: F1, 127N	Found in Sample Group: F1, 127C	Found in Sample Group: F1, 128N	Found in Sample Group: F1, 128C	Found in Sample Group: F1, 129N	Found in Sample Group: F1, 129C	Found in Sample Group: F1, 130N	Found in Sample Group: F1, 130C	Found in Sample Group: F1, 131
		High	QSLYEEENFFSENQPFPSLK	2xTMT6plex [N-Term; K20]	4.41597e-06	0	1	3	1	Q8C0L9	0	2891.45	Not Found	Not Found	Not Found	Not Found	Not Found	Not Found	Not Found	Not Found	Not Found	High	Not Found	Not Found	Not Found	Not Found	Not Found	Not Found	Not Found	High	High	High	High	High	High	High	High	High	High	High	High	High	High	High	High	High	High	High	High
High	Master Protein	Q8QZY9	Splicing factor 3B subunit 4 OS=Mus musculus OX=10090 GN=Sf3b4 PE=1 SV=1	0.00152012	5.04507	8.96226	2	2	2	1	424	44.327	8.56	Not Found	Not Found	High	Not Found	Not Found	Not Found	Not Found	Not Found	Not Found	Not Found	Not Found	Not Found	Not Found	Not Found	High	Not Found	Not Found	High	High	High	High	High	High	High	High	High	High	High	High	High	High	High	High	High	High	High
Checked	Protein Group ID	# Proteins	# Unique Peptides	# Peptides	# PSMs	Group Description	Mouse_Cell_661W_TMT_1_HpH_Fract_1.raw	Mouse_Cell_661W_TMT_1_HpH_Fract_10.raw	Mouse_Cell_661W_TMT_1_HpH_Fract_11.raw	Mouse_Cell_661W_TMT_1_HpH_Fract_12.raw	Mouse_Cell_661W_TMT_1_HpH_Fract_13.raw	Mouse_Cell_661W_TMT_1_HpH_Fract_14.raw	Mouse_Cell_661W_TMT_1_HpH_Fract_15.raw	Mouse_Cell_661W_TMT_1_HpH_Fract_16.raw	Mouse_Cell_661W_TMT_1_HpH_Fract_17.raw	Mouse_Cell_661W_TMT_1_HpH_Fract_2.raw	Mouse_Cell_661W_TMT_1_HpH_Fract_3.raw	Mouse_Cell_661W_TMT_1_HpH_Fract_4.raw	Mouse_Cell_661W_TMT_1_HpH_Fract_5.raw	Mouse_Cell_661W_TMT_1_HpH_Fract_6.raw	Mouse_Cell_661W_TMT_1_HpH_Fract_7.raw	Mouse_Cell_661W_TMT_1_HpH_Fract_8.raw	Mouse_Cell_661W_TMT_1_HpH_Fract_9.raw	Found in Sample: [S1] F1: 126, Control	Found in Sample: [S2] F1: 127N, Sample	Found in Sample: [S3] F1: 127C, Sample	Found in Sample: [S4] F1: 128N, Sample	Found in Sample: [S5] F1: 128C, Sample	Found in Sample: [S6] F1: 129N, Sample	Found in Sample: [S7] F1: 129C, Sample	Found in Sample: [S8] F1: 130N, Sample	Found in Sample: [S9] F1: 130C, Sample	Found in Sample: [S10] F1: 131, Sample	Found in Sample Group: F1, 126	Found in Sample Group: F1, 127N	Found in Sample Group: F1, 127C	Found in Sample Group: F1, 128N	Found in Sample Group: F1, 128C	Found in Sample Group: F1, 129N	Found in Sample Group: F1, 129C	Found in Sample Group: F1, 130N	Found in Sample Group: F1, 130C	Found in Sample Group: F1, 131
	3644	1	2	2	2	[Master Protein] Splicing factor 3B subunit 4 OS=Mus musculus OX=10090 GN=Sf3b4 PE=1 SV=1	Not Found	Not Found	High	Not Found	Not Found	Not Found	Not Found	Not Found	Not Found	Not Found	Not Found	Not Found	Not Found	Not Found	High	Not Found	Not Found	High	High	High	High	High	High	High	High	High	High	High	High	High	High	High	High	High	High	High	High
	Checked	Confidence	Sequence	Modifications	Qvality PEP	Qvality q-value	# Protein Groups	# Proteins	# PSMs	Master Protein Accessions	# Missed Cleavages	Theo. MH+ [Da]	Mouse_Cell_661W_TMT_1_HpH_Fract_1.raw	Mouse_Cell_661W_TMT_1_HpH_Fract_10.raw	Mouse_Cell_661W_TMT_1_HpH_Fract_11.raw	Mouse_Cell_661W_TMT_1_HpH_Fract_12.raw	Mouse_Cell_661W_TMT_1_HpH_Fract_13.raw	Mouse_Cell_661W_TMT_1_HpH_Fract_14.raw	Mouse_Cell_661W_TMT_1_HpH_Fract_15.raw	Mouse_Cell_661W_TMT_1_HpH_Fract_16.raw	Mouse_Cell_661W_TMT_1_HpH_Fract_17.raw	Mouse_Cell_661W_TMT_1_HpH_Fract_2.raw	Mouse_Cell_661W_TMT_1_HpH_Fract_3.raw	Mouse_Cell_661W_TMT_1_HpH_Fract_4.raw	Mouse_Cell_661W_TMT_1_HpH_Fract_5.raw	Mouse_Cell_661W_TMT_1_HpH_Fract_6.raw	Mouse_Cell_661W_TMT_1_HpH_Fract_7.raw	Mouse_Cell_661W_TMT_1_HpH_Fract_8.raw	Mouse_Cell_661W_TMT_1_HpH_Fract_9.raw	Found in Sample: [S1] F1: 126, Control	Found in Sample: [S2] F1: 127N, Sample	Found in Sample: [S3] F1: 127C, Sample	Found in Sample: [S4] F1: 128N, Sample	Found in Sample: [S5] F1: 128C, Sample	Found in Sample: [S6] F1: 129N, Sample	Found in Sample: [S7] F1: 129C, Sample	Found in Sample: [S8] F1: 130N, Sample	Found in Sample: [S9] F1: 130C, Sample	Found in Sample: [S10] F1: 131, Sample	Found in Sample Group: F1, 126	Found in Sample Group: F1, 127N	Found in Sample Group: F1, 127C	Found in Sample Group: F1, 128N	Found in Sample Group: F1, 128C	Found in Sample Group: F1, 129N	Found in Sample Group: F1, 129C	Found in Sample Group: F1, 130N	Found in Sample Group: F1, 130C	Found in Sample Group: F1, 131
		High	NQDATVYVGGLDEK	2xTMT6plex [N-Term; K14]	0.000447795	9.38446e-05	1	1	1	Q8QZY9	0	1967.05	Not Found	Not Found	Not Found	Not Found	Not Found	Not Found	Not Found	Not Found	Not Found	Not Found	Not Found	Not Found	Not Found	Not Found	High	Not Found	Not Found	High	High	High	High	High	High	High	High	High	High	High	High	High	High	High	High	High	High	High	High
		High	VTGQHQGYGFVEFLSEEDADYAIK	1xDeamidated [Q6]; 2xTMT6plex [N-Term; K24]	0.0510981	0.00452533	1	1	1	Q8QZY9	0	3162.57	Not Found	Not Found	High	Not Found	Not Found	Not Found	Not Found	Not Found	Not Found	Not Found	Not Found	Not Found	Not Found	Not Found	Not Found	Not Found	Not Found	High	High	High	High	High	High	High	High	High	High	High	High	High	High	High	High	High	High	High	High
High	Master Protein	P27601	Guanine nucleotide-binding protein subunit alpha-13 OS=Mus musculus OX=10090 GN=Gna13 PE=1 SV=1	0	52.4066	27.8515	8	29	7	1	377	44.027	8.21	High	High	High	High	High	High	Not Found	Not Found	Not Found	High	Not Found	Not Found	Not Found	Not Found	High	Not Found	High	High	High	High	High	High	High	High	High	High	High	High	High	High	High	High	High	High	High	High
Checked	Protein Group ID	# Proteins	# Unique Peptides	# Peptides	# PSMs	Group Description	Mouse_Cell_661W_TMT_1_HpH_Fract_1.raw	Mouse_Cell_661W_TMT_1_HpH_Fract_10.raw	Mouse_Cell_661W_TMT_1_HpH_Fract_11.raw	Mouse_Cell_661W_TMT_1_HpH_Fract_12.raw	Mouse_Cell_661W_TMT_1_HpH_Fract_13.raw	Mouse_Cell_661W_TMT_1_HpH_Fract_14.raw	Mouse_Cell_661W_TMT_1_HpH_Fract_15.raw	Mouse_Cell_661W_TMT_1_HpH_Fract_16.raw	Mouse_Cell_661W_TMT_1_HpH_Fract_17.raw	Mouse_Cell_661W_TMT_1_HpH_Fract_2.raw	Mouse_Cell_661W_TMT_1_HpH_Fract_3.raw	Mouse_Cell_661W_TMT_1_HpH_Fract_4.raw	Mouse_Cell_661W_TMT_1_HpH_Fract_5.raw	Mouse_Cell_661W_TMT_1_HpH_Fract_6.raw	Mouse_Cell_661W_TMT_1_HpH_Fract_7.raw	Mouse_Cell_661W_TMT_1_HpH_Fract_8.raw	Mouse_Cell_661W_TMT_1_HpH_Fract_9.raw	Found in Sample: [S1] F1: 126, Control	Found in Sample: [S2] F1: 127N, Sample	Found in Sample: [S3] F1: 127C, Sample	Found in Sample: [S4] F1: 128N, Sample	Found in Sample: [S5] F1: 128C, Sample	Found in Sample: [S6] F1: 129N, Sample	Found in Sample: [S7] F1: 129C, Sample	Found in Sample: [S8] F1: 130N, Sample	Found in Sample: [S9] F1: 130C, Sample	Found in Sample: [S10] F1: 131, Sample	Found in Sample Group: F1, 126	Found in Sample Group: F1, 127N	Found in Sample Group: F1, 127C	Found in Sample Group: F1, 128N	Found in Sample Group: F1, 128C	Found in Sample Group: F1, 129N	Found in Sample Group: F1, 129C	Found in Sample Group: F1, 130N	Found in Sample Group: F1, 130C	Found in Sample Group: F1, 131
	3643	5	7	8	39	[Master Protein] Guanine nucleotide-binding protein subunit alpha-13 OS=Mus musculus OX=10090 GN=Gna13 PE=1 SV=1	High	High	High	High	High	High	Not Found	Not Found	Not Found	High	Not Found	Not Found	Not Found	Not Found	High	Not Found	High	High	High	High	High	High	High	High	High	High	High	High	High	High	High	High	High	High	High	High	High
	Checked	Confidence	Sequence	Modifications	Qvality PEP	Qvality q-value	# Protein Groups	# Proteins	# PSMs	Master Protein Accessions	# Missed Cleavages	Theo. MH+ [Da]	Mouse_Cell_661W_TMT_1_HpH_Fract_1.raw	Mouse_Cell_661W_TMT_1_HpH_Fract_10.raw	Mouse_Cell_661W_TMT_1_HpH_Fract_11.raw	Mouse_Cell_661W_TMT_1_HpH_Fract_12.raw	Mouse_Cell_661W_TMT_1_HpH_Fract_13.raw	Mouse_Cell_661W_TMT_1_HpH_Fract_14.raw	Mouse_Cell_661W_TMT_1_HpH_Fract_15.raw	Mouse_Cell_661W_TMT_1_HpH_Fract_16.raw	Mouse_Cell_661W_TMT_1_HpH_Fract_17.raw	Mouse_Cell_661W_TMT_1_HpH_Fract_2.raw	Mouse_Cell_661W_TMT_1_HpH_Fract_3.raw	Mouse_Cell_661W_TMT_1_HpH_Fract_4.raw	Mouse_Cell_661W_TMT_1_HpH_Fract_5.raw	Mouse_Cell_661W_TMT_1_HpH_Fract_6.raw	Mouse_Cell_661W_TMT_1_HpH_Fract_7.raw	Mouse_Cell_661W_TMT_1_HpH_Fract_8.raw	Mouse_Cell_661W_TMT_1_HpH_Fract_9.raw	Found in Sample: [S1] F1: 126, Control	Found in Sample: [S2] F1: 127N, Sample	Found in Sample: [S3] F1: 127C, Sample	Found in Sample: [S4] F1: 128N, Sample	Found in Sample: [S5] F1: 128C, Sample	Found in Sample: [S6] F1: 129N, Sample	Found in Sample: [S7] F1: 129C, Sample	Found in Sample: [S8] F1: 130N, Sample	Found in Sample: [S9] F1: 130C, Sample	Found in Sample: [S10] F1: 131, Sample	Found in Sample Group: F1, 126	Found in Sample Group: F1, 127N	Found in Sample Group: F1, 127C	Found in Sample Group: F1, 128N	Found in Sample Group: F1, 128C	Found in Sample Group: F1, 129N	Found in Sample Group: F1, 129C	Found in Sample Group: F1, 130N	Found in Sample Group: F1, 130C	Found in Sample Group: F1, 131
		High	LGVPDYIPSQQDILLAR	1xTMT6plex [N-Term]	1.38004e-05	0	1	1	5	P27601	0	2127.2	Not Found	Not Found	Not Found	High	High	Not Found	Not Found	Not Found	Not Found	Not Found	Not Found	Not Found	Not Found	Not Found	Not Found	Not Found	Not Found	High	High	High	High	High	High	High	High	High	High	High	High	High	High	High	High	High	High	High	High
		High	LTESLNIFETIVNNR	1xTMT6plex [N-Term]	8.58495e-07	0	1	1	4	P27601	0	1992.1	Not Found	Not Found	High	Not Found	Not Found	Not Found	Not Found	Not Found	Not Found	Not Found	Not Found	Not Found	Not Found	Not Found	Not Found	Not Found	Not Found	High	High	High	High	High	High	High	High	High	High	High	High	High	High	High	High	High	High	High	High
		High	ALWEDSGIQNAYDR	1xDeamidated [Q9]; 1xTMT6plex [N-Term]	6.38224e-05	0	1	2	2	P27601	0	1867.9	Not Found	Not Found	Not Found	Not Found	Not Found	Not Found	Not Found	Not Found	Not Found	Not Found	Not Found	Not Found	Not Found	Not Found	Not Found	Not Found	High	High	High	High	High	High	High	High	High	High	High	High	High	High	High	High	High	High	High	High	High
		High	EFQLGESVK	2xTMT6plex [N-Term; K9]	2.99011e-05	0	1	1	2	P27601	0	1494.86	High	Not Found	Not Found	Not Found	Not Found	Not Found	Not Found	Not Found	Not Found	High	Not Found	Not Found	Not Found	Not Found	Not Found	Not Found	Not Found	High	High	High	High	High	High	High	High	High	High	High	High	High	High	High	High	High	High	High	High
		High	LLLLGAGESGK	1xTMT6plex [N-Term]	4.55207e-05	0	5	22	4	Q9DC51; Q6R0H7; P27601; P18872-2; P08752	0	1286.79	Not Found	Not Found	High	Not Found	Not Found	Not Found	Not Found	Not Found	Not Found	Not Found	Not Found	Not Found	Not Found	Not Found	Not Found	Not Found	Not Found	High	High	High	High	High	High	High	High	High	High	High	High	High	High	High	High	High	High	High	High
		High	LLLLGAGESGK	2xTMT6plex [N-Term; K11]	1.32163e-07	0	5	22	18	Q9DC51; Q6R0H7; P27601; P18872-2; P08752	0	1515.95	Not Found	High	Not Found	Not Found	Not Found	Not Found	Not Found	Not Found	Not Found	Not Found	Not Found	Not Found	Not Found	Not Found	Not Found	Not Found	High	High	High	High	High	High	High	High	High	High	High	High	High	High	High	High	High	High	High	High	High
		High	SVLSVCFPGCVLTNGEAEQQR	2xDeamidated [N/Q]; 2xCarbamidomethyl [C6; C10]; 1xTMT6plex [N-Term]	0.00160883	0.000282382	1	2	3	P27601	0	2582.24	High	Not Found	Not Found	Not Found	Not Found	Not Found	Not Found	Not Found	Not Found	Not Found	Not Found	Not Found	Not Found	Not Found	Not Found	Not Found	Not Found	High	High	High	High	High	High	High	High	High	High	High	High	High	High	High	High	High	High	High	High
		High	DTILHDNLK	2xTMT6plex [N-Term; K9]	0.00932661	0.000913822	1	1	1	P27601	0	1526.89	Not Found	Not Found	Not Found	Not Found	Not Found	High	Not Found	Not Found	Not Found	Not Found	Not Found	Not Found	Not Found	Not Found	Not Found	Not Found	Not Found	High	High	High	High	High	High	High	High	High	High	High	High	High	High	High	High	High	High	High	High
		High	LHIPWGDNK	2xTMT6plex [N-Term; K9]	0.0184274	0.00178521	1	2	1	P27601	0	1537.89	Not Found	Not Found	Not Found	Not Found	Not Found	Not Found	Not Found	Not Found	Not Found	Not Found	Not Found	Not Found	Not Found	Not Found	High	Not Found	Not Found	High	High	High	High	High	High	High	High	High	High	High	High	High	High	High	High	High	High	High	High
High	Master Protein	Q9D7G0	Ribose-phosphate pyrophosphokinase 1 OS=Mus musculus OX=10090 GN=Prps1 PE=1 SV=4	0	81.7152	45.283	12	34	5	1	318	34.812	6.98	High	High	Not Found	High	Not Found	High	Not Found	Not Found	Not Found	High	High	High	Not Found	High	Not Found	High	Not Found	High	High	High	High	High	High	High	High	High	High	High	High	High	High	High	High	High	High	High
Checked	Protein Group ID	# Proteins	# Unique Peptides	# Peptides	# PSMs	Group Description	Mouse_Cell_661W_TMT_1_HpH_Fract_1.raw	Mouse_Cell_661W_TMT_1_HpH_Fract_10.raw	Mouse_Cell_661W_TMT_1_HpH_Fract_11.raw	Mouse_Cell_661W_TMT_1_HpH_Fract_12.raw	Mouse_Cell_661W_TMT_1_HpH_Fract_13.raw	Mouse_Cell_661W_TMT_1_HpH_Fract_14.raw	Mouse_Cell_661W_TMT_1_HpH_Fract_15.raw	Mouse_Cell_661W_TMT_1_HpH_Fract_16.raw	Mouse_Cell_661W_TMT_1_HpH_Fract_17.raw	Mouse_Cell_661W_TMT_1_HpH_Fract_2.raw	Mouse_Cell_661W_TMT_1_HpH_Fract_3.raw	Mouse_Cell_661W_TMT_1_HpH_Fract_4.raw	Mouse_Cell_661W_TMT_1_HpH_Fract_5.raw	Mouse_Cell_661W_TMT_1_HpH_Fract_6.raw	Mouse_Cell_661W_TMT_1_HpH_Fract_7.raw	Mouse_Cell_661W_TMT_1_HpH_Fract_8.raw	Mouse_Cell_661W_TMT_1_HpH_Fract_9.raw	Found in Sample: [S1] F1: 126, Control	Found in Sample: [S2] F1: 127N, Sample	Found in Sample: [S3] F1: 127C, Sample	Found in Sample: [S4] F1: 128N, Sample	Found in Sample: [S5] F1: 128C, Sample	Found in Sample: [S6] F1: 129N, Sample	Found in Sample: [S7] F1: 129C, Sample	Found in Sample: [S8] F1: 130N, Sample	Found in Sample: [S9] F1: 130C, Sample	Found in Sample: [S10] F1: 131, Sample	Found in Sample Group: F1, 126	Found in Sample Group: F1, 127N	Found in Sample Group: F1, 127C	Found in Sample Group: F1, 128N	Found in Sample Group: F1, 128C	Found in Sample Group: F1, 129N	Found in Sample Group: F1, 129C	Found in Sample Group: F1, 130N	Found in Sample Group: F1, 130C	Found in Sample Group: F1, 131
	3642	5	5	12	35	[Master Protein] Ribose-phosphate pyrophosphokinase 1 OS=Mus musculus OX=10090 GN=Prps1 PE=1 SV=4	High	High	Not Found	High	Not Found	High	Not Found	Not Found	Not Found	High	High	High	Not Found	High	Not Found	High	Not Found	High	High	High	High	High	High	High	High	High	High	High	High	High	High	High	High	High	High	High	High
	Checked	Confidence	Sequence	Modifications	Qvality PEP	Qvality q-value	# Protein Groups	# Proteins	# PSMs	Master Protein Accessions	# Missed Cleavages	Theo. MH+ [Da]	Mouse_Cell_661W_TMT_1_HpH_Fract_1.raw	Mouse_Cell_661W_TMT_1_HpH_Fract_10.raw	Mouse_Cell_661W_TMT_1_HpH_Fract_11.raw	Mouse_Cell_661W_TMT_1_HpH_Fract_12.raw	Mouse_Cell_661W_TMT_1_HpH_Fract_13.raw	Mouse_Cell_661W_TMT_1_HpH_Fract_14.raw	Mouse_Cell_661W_TMT_1_HpH_Fract_15.raw	Mouse_Cell_661W_TMT_1_HpH_Fract_16.raw	Mouse_Cell_661W_TMT_1_HpH_Fract_17.raw	Mouse_Cell_661W_TMT_1_HpH_Fract_2.raw	Mouse_Cell_661W_TMT_1_HpH_Fract_3.raw	Mouse_Cell_661W_TMT_1_HpH_Fract_4.raw	Mouse_Cell_661W_TMT_1_HpH_Fract_5.raw	Mouse_Cell_661W_TMT_1_HpH_Fract_6.raw	Mouse_Cell_661W_TMT_1_HpH_Fract_7.raw	Mouse_Cell_661W_TMT_1_HpH_Fract_8.raw	Mouse_Cell_661W_TMT_1_HpH_Fract_9.raw	Found in Sample: [S1] F1: 126, Control	Found in Sample: [S2] F1: 127N, Sample	Found in Sample: [S3] F1: 127C, Sample	Found in Sample: [S4] F1: 128N, Sample	Found in Sample: [S5] F1: 128C, Sample	Found in Sample: [S6] F1: 129N, Sample	Found in Sample: [S7] F1: 129C, Sample	Found in Sample: [S8] F1: 130N, Sample	Found in Sample: [S9] F1: 130C, Sample	Found in Sample: [S10] F1: 131, Sample	Found in Sample Group: F1, 126	Found in Sample Group: F1, 127N	Found in Sample Group: F1, 127C	Found in Sample Group: F1, 128N	Found in Sample Group: F1, 128C	Found in Sample Group: F1, 129N	Found in Sample Group: F1, 129C	Found in Sample Group: F1, 130N	Found in Sample Group: F1, 130C	Found in Sample Group: F1, 131
		High	IQVIDISMILAEAIR	1xOxidation [M8]; 1xTMT6plex [N-Term]	1.98434e-06	0	2	3	8	Q9CS42; Q9D7G0	0	1930.12	Not Found	Not Found	Not Found	High	Not Found	Not Found	Not Found	Not Found	Not Found	Not Found	Not Found	Not Found	Not Found	Not Found	Not Found	Not Found	Not Found	High	High	High	High	High	High	High	High	High	High	High	High	High	High	High	High	High	High	High	High
		High	VAILVDDMADTCGTICHAADK	2xCarbamidomethyl [C12; C16]; 2xTMT6plex [N-Term; K21]	3.89306e-08	0	2	3	1	Q9CS42; Q9D7G0	0	2734.36	Not Found	Not Found	Not Found	High	Not Found	Not Found	Not Found	Not Found	Not Found	Not Found	Not Found	Not Found	Not Found	Not Found	Not Found	Not Found	Not Found	High	High	High	High	High	High	High	High	High	High	High	High	High	High	High	High	High	High	High	High
		High	VAILVDDMADTCGTICHAADK	2xCarbamidomethyl [C12; C16]; 1xTMT6plex [N-Term]	1.25284e-06	0	2	3	2	Q9CS42; Q9D7G0	0	2505.2	Not Found	Not Found	Not Found	Not Found	Not Found	Not Found	Not Found	Not Found	Not Found	Not Found	Not Found	Not Found	Not Found	Not Found	Not Found	High	Not Found	High	High	High	High	High	High	High	High	High	High	High	High	High	High	High	High	High	High	High	High
		High	VTAVIPCFPYAR	1xCarbamidomethyl [C7]; 1xTMT6plex [N-Term]	2.65377e-05	0	2	4	2	Q9CS42; Q9D7G0	0	1622.89	Not Found	Not Found	Not Found	Not Found	Not Found	High	Not Found	Not Found	Not Found	Not Found	Not Found	Not Found	Not Found	Not Found	Not Found	Not Found	Not Found	High	High	High	High	High	High	High	High	High	High	High	High	High	High	High	High	High	High	High	High
		High	THNGESVSYLFSHVPL	1xDeamidated [N3]; 1xTMT6plex [N-Term]	2.9714e-05	0	2	4	2	Q9CS42; Q9D7G0	0	2017.02	Not Found	Not Found	Not Found	Not Found	Not Found	Not Found	Not Found	Not Found	Not Found	Not Found	Not Found	Not Found	Not Found	High	Not Found	Not Found	Not Found	High	High	High	High	High	High	High	High	High	High	High	High	High	High	High	High	High	High	High	High
		High	THNGESVSYLFSHVPL	1xTMT6plex [N-Term]	1.94095e-07	0	2	4	2	Q9CS42; Q9D7G0	0	2016.04	Not Found	Not Found	Not Found	High	Not Found	Not Found	Not Found	Not Found	Not Found	Not Found	Not Found	Not Found	Not Found	Not Found	Not Found	Not Found	Not Found	High	High	High	High	High	High	High	High	High	High	High	High	High	High	High	High	High	High	High	High
		High	NCTIVSPDAGGAK	1xCarbamidomethyl [C2]; 2xTMT6plex [N-Term; K13]	4.67348e-08	0	1	3	2	Q9D7G0	0	1747.94	Not Found	Not Found	Not Found	Not Found	Not Found	Not Found	Not Found	Not Found	Not Found	High	High	Not Found	Not Found	Not Found	Not Found	Not Found	Not Found	High	High	High	High	High	High	High	High	High	High	High	High	High	High	High	High	High	High	High	High
		High	INNACFEAVVVTNTIPQEDK	1xCarbamidomethyl [C5]; 1xTMT6plex [N-Term]	8.82741e-06	0	1	2	2	Q9D7G0	0	2491.27	High	Not Found	Not Found	Not Found	Not Found	Not Found	Not Found	Not Found	Not Found	Not Found	Not Found	Not Found	Not Found	Not Found	Not Found	Not Found	Not Found	High	High	High	High	High	High	High	High	High	High	High	High	High	High	High	High	High	High	High	High
		High	INNACFEAVVVTNTIPQEDK	1xCarbamidomethyl [C5]; 2xTMT6plex [N-Term; K20]	1.38947e-09	0	1	2	1	Q9D7G0	0	2720.43	Not Found	Not Found	Not Found	Not Found	Not Found	Not Found	Not Found	Not Found	Not Found	Not Found	High	Not Found	Not Found	Not Found	Not Found	Not Found	Not Found	High	High	High	High	High	High	High	High	High	High	High	High	High	High	High	High	High	High	High	High
		High	MVLVGDVK	2xTMT6plex [N-Term; K8]	0.00047809	9.38446e-05	2	4	2	Q9CS42; Q9D7G0	0	1318.82	High	Not Found	Not Found	Not Found	Not Found	Not Found	Not Found	Not Found	Not Found	High	Not Found	Not Found	Not Found	Not Found	Not Found	Not Found	Not Found	High	High	High	High	High	High	High	High	High	High	High	High	High	High	High	High	High	High	High	High
		High	LNVDFALIHK	2xTMT6plex [N-Term; K10]	0.00129251	0.000215237	1	2	1	Q9D7G0	0	1627.99	Not Found	High	Not Found	Not Found	Not Found	Not Found	Not Found	Not Found	Not Found	Not Found	Not Found	Not Found	Not Found	Not Found	Not Found	Not Found	Not Found	High	High	High	High	High	High	High	High	High	High	High	High	High	High	High	High	High	High	High	High
		High	INNACFEAVVVTNTIPQEDK	1xDeamidated [N13]; 1xCarbamidomethyl [C5]; 2xTMT6plex [N-Term; K20]	0.00369854	0.000417981	1	2	1	Q9D7G0	0	2721.42	Not Found	Not Found	Not Found	Not Found	Not Found	Not Found	Not Found	Not Found	Not Found	Not Found	High	Not Found	Not Found	Not Found	Not Found	Not Found	Not Found	High	High	High	High	High	High	High	High	High	High	High	High	High	High	High	High	High	High	High	High
		High	LLSAGATR	1xTMT6plex [N-Term]	0.0115824	0.00114322	1	2	2	Q9D7G0	0	1017.63	Not Found	Not Found	Not Found	High	Not Found	Not Found	Not Found	Not Found	Not Found	Not Found	Not Found	Not Found	Not Found	Not Found	Not Found	Not Found	Not Found	High	High	High	High	High	High	High	High	High	High	High	High	High	High	High	High	High	High	High	High
		High	LGIEIGK	2xTMT6plex [N-Term; K7]	0.0196005	0.00187523	2	5	2	Q9CS42; Q9D7G0	0	1187.78	Not Found	Not Found	Not Found	Not Found	Not Found	Not Found	Not Found	Not Found	Not Found	Not Found	High	Not Found	Not Found	Not Found	Not Found	Not Found	Not Found	High	High	High	High	High	High	High	High	High	High	High	High	High	High	High	High	High	High	High	High
		High	NCTIVSPDAGGAK	1xDeamidated [N1]; 1xCarbamidomethyl [C2]; 1xTMT6plex [K13]	0.0220165	0.00210865	1	3	1	Q9D7G0	0	1519.76	Not Found	Not Found	Not Found	Not Found	Not Found	Not Found	Not Found	Not Found	Not Found	Not Found	High	Not Found	Not Found	Not Found	Not Found	Not Found	Not Found	High	High	High	High	High	High	High	High	High	High	High	High	High	High	High	High	High	High	High	High
		High	VTSIADR	1xTMT6plex [N-Term]	0.0404353	0.0036867	2	3	2	Q9CS42; Q9D7G0	0	990.578	Not Found	Not Found	Not Found	Not Found	Not Found	High	Not Found	Not Found	Not Found	Not Found	Not Found	Not Found	Not Found	Not Found	Not Found	Not Found	Not Found	High	High	High	High	High	High	High	High	High	High	High	High	High	High	High	High	High	High	High	High
		High	ENISEWR	1xTMT6plex [N-Term]	0.0532167	0.00470267	1	2	2	Q9D7G0	0	1162.61	Not Found	Not Found	Not Found	Not Found	Not Found	Not Found	Not Found	Not Found	Not Found	Not Found	Not Found	High	Not Found	Not Found	Not Found	Not Found	Not Found	High	High	High	High	High	High	High	High	High	High	High	High	High	High	High	High	High	High	High	High
High	Master Protein	Q9R0M6	Ras-related protein Rab-9A OS=Mus musculus OX=10090 GN=Rab9a PE=1 SV=1	0	36.8332	37.8109	6	16	6	1	201	22.895	5.66	Not Found	High	Not Found	Not Found	Not Found	High	Not Found	Not Found	Not Found	Not Found	Not Found	Not Found	High	High	Not Found	High	Not Found	High	High	High	High	High	High	High	High	High	High	High	High	High	High	High	High	High	High	High
Checked	Protein Group ID	# Proteins	# Unique Peptides	# Peptides	# PSMs	Group Description	Mouse_Cell_661W_TMT_1_HpH_Fract_1.raw	Mouse_Cell_661W_TMT_1_HpH_Fract_10.raw	Mouse_Cell_661W_TMT_1_HpH_Fract_11.raw	Mouse_Cell_661W_TMT_1_HpH_Fract_12.raw	Mouse_Cell_661W_TMT_1_HpH_Fract_13.raw	Mouse_Cell_661W_TMT_1_HpH_Fract_14.raw	Mouse_Cell_661W_TMT_1_HpH_Fract_15.raw	Mouse_Cell_661W_TMT_1_HpH_Fract_16.raw	Mouse_Cell_661W_TMT_1_HpH_Fract_17.raw	Mouse_Cell_661W_TMT_1_HpH_Fract_2.raw	Mouse_Cell_661W_TMT_1_HpH_Fract_3.raw	Mouse_Cell_661W_TMT_1_HpH_Fract_4.raw	Mouse_Cell_661W_TMT_1_HpH_Fract_5.raw	Mouse_Cell_661W_TMT_1_HpH_Fract_6.raw	Mouse_Cell_661W_TMT_1_HpH_Fract_7.raw	Mouse_Cell_661W_TMT_1_HpH_Fract_8.raw	Mouse_Cell_661W_TMT_1_HpH_Fract_9.raw	Found in Sample: [S1] F1: 126, Control	Found in Sample: [S2] F1: 127N, Sample	Found in Sample: [S3] F1: 127C, Sample	Found in Sample: [S4] F1: 128N, Sample	Found in Sample: [S5] F1: 128C, Sample	Found in Sample: [S6] F1: 129N, Sample	Found in Sample: [S7] F1: 129C, Sample	Found in Sample: [S8] F1: 130N, Sample	Found in Sample: [S9] F1: 130C, Sample	Found in Sample: [S10] F1: 131, Sample	Found in Sample Group: F1, 126	Found in Sample Group: F1, 127N	Found in Sample Group: F1, 127C	Found in Sample Group: F1, 128N	Found in Sample Group: F1, 128C	Found in Sample Group: F1, 129N	Found in Sample Group: F1, 129C	Found in Sample Group: F1, 130N	Found in Sample Group: F1, 130C	Found in Sample Group: F1, 131
	3641	4	6	6	16	[Master Protein] Ras-related protein Rab-9A OS=Mus musculus OX=10090 GN=Rab9a PE=1 SV=1	Not Found	High	Not Found	Not Found	Not Found	High	Not Found	Not Found	Not Found	Not Found	Not Found	Not Found	High	High	Not Found	High	Not Found	High	High	High	High	High	High	High	High	High	High	High	High	High	High	High	High	High	High	High	High
	Checked	Confidence	Sequence	Modifications	Qvality PEP	Qvality q-value	# Protein Groups	# Proteins	# PSMs	Master Protein Accessions	# Missed Cleavages	Theo. MH+ [Da]	Mouse_Cell_661W_TMT_1_HpH_Fract_1.raw	Mouse_Cell_661W_TMT_1_HpH_Fract_10.raw	Mouse_Cell_661W_TMT_1_HpH_Fract_11.raw	Mouse_Cell_661W_TMT_1_HpH_Fract_12.raw	Mouse_Cell_661W_TMT_1_HpH_Fract_13.raw	Mouse_Cell_661W_TMT_1_HpH_Fract_14.raw	Mouse_Cell_661W_TMT_1_HpH_Fract_15.raw	Mouse_Cell_661W_TMT_1_HpH_Fract_16.raw	Mouse_Cell_661W_TMT_1_HpH_Fract_17.raw	Mouse_Cell_661W_TMT_1_HpH_Fract_2.raw	Mouse_Cell_661W_TMT_1_HpH_Fract_3.raw	Mouse_Cell_661W_TMT_1_HpH_Fract_4.raw	Mouse_Cell_661W_TMT_1_HpH_Fract_5.raw	Mouse_Cell_661W_TMT_1_HpH_Fract_6.raw	Mouse_Cell_661W_TMT_1_HpH_Fract_7.raw	Mouse_Cell_661W_TMT_1_HpH_Fract_8.raw	Mouse_Cell_661W_TMT_1_HpH_Fract_9.raw	Found in Sample: [S1] F1: 126, Control	Found in Sample: [S2] F1: 127N, Sample	Found in Sample: [S3] F1: 127C, Sample	Found in Sample: [S4] F1: 128N, Sample	Found in Sample: [S5] F1: 128C, Sample	Found in Sample: [S6] F1: 129N, Sample	Found in Sample: [S7] F1: 129C, Sample	Found in Sample: [S8] F1: 130N, Sample	Found in Sample: [S9] F1: 130C, Sample	Found in Sample: [S10] F1: 131, Sample	Found in Sample Group: F1, 126	Found in Sample Group: F1, 127N	Found in Sample Group: F1, 127C	Found in Sample Group: F1, 128N	Found in Sample Group: F1, 128C	Found in Sample Group: F1, 129N	Found in Sample Group: F1, 129C	Found in Sample Group: F1, 130N	Found in Sample Group: F1, 130C	Found in Sample Group: F1, 131
		High	DSTNVAAAFEEAVR	1xTMT6plex [N-Term]	9.19506e-11	0	1	2	4	Q9R0M6	0	1708.87	Not Found	Not Found	Not Found	Not Found	Not Found	Not Found	Not Found	Not Found	Not Found	Not Found	Not Found	Not Found	Not Found	Not Found	Not Found	High	Not Found	High	High	High	High	High	High	High	High	High	High	High	High	High	High	High	High	High	High	High	High
		High	FDSQLFHTIGVEFLNK	2xTMT6plex [N-Term; K16]	7.10651e-07	0	1	3	1	Q9R0M6	0	2353.3	Not Found	High	Not Found	Not Found	Not Found	Not Found	Not Found	Not Found	Not Found	Not Found	Not Found	Not Found	Not Found	Not Found	Not Found	Not Found	Not Found	High	High	High	High	High	High	High	High	High	High	High	High	High	High	High	High	High	High	High	High
		High	IILLGDGGVGK	2xTMT6plex [N-Term; K11]	3.96759e-06	0	1	3	3	Q9R0M6	0	1499.96	Not Found	Not Found	Not Found	Not Found	Not Found	Not Found	Not Found	Not Found	Not Found	Not Found	Not Found	Not Found	Not Found	Not Found	Not Found	High	Not Found	High	High	High	High	High	High	High	High	High	High	High	High	High	High	High	High	High	High	High	High
		High	EPESFPFVILGNK	2xTMT6plex [N-Term; K13]	0.000404626	9.38446e-05	1	2	4	Q9R0M6	0	1935.1	Not Found	Not Found	Not Found	Not Found	Not Found	High	Not Found	Not Found	Not Found	Not Found	Not Found	Not Found	Not Found	Not Found	Not Found	Not Found	Not Found	High	High	High	High	High	High	High	High	High	High	High	High	High	High	High	High	High	High	High	High
		High	DNGDYPYFETSAK	2xTMT6plex [N-Term; K13]	0.00367363	0.000417981	1	2	2	Q9R0M6	0	1964.96	Not Found	Not Found	Not Found	Not Found	Not Found	Not Found	Not Found	Not Found	Not Found	Not Found	Not Found	Not Found	Not Found	High	Not Found	Not Found	Not Found	High	High	High	High	High	High	High	High	High	High	High	High	High	High	High	High	High	High	High	High
		High	EFIYYADVK	2xTMT6plex [N-Term; K9]	0.0113242	0.00112456	1	3	2	Q9R0M6	0	1605.89	Not Found	Not Found	Not Found	Not Found	Not Found	Not Found	Not Found	Not Found	Not Found	Not Found	Not Found	Not Found	High	Not Found	Not Found	Not Found	Not Found	High	High	High	High	High	High	High	High	High	High	High	High	High	High	High	High	High	High	High	High
High	Master Protein	O54785	LIM domain kinase 2 OS=Mus musculus OX=10090 GN=Limk2 PE=1 SV=2	0.00369405	3.59843	2.19436	1	1	1	1	638	72.155	7.5	Not Found	Not Found	Not Found	Not Found	Not Found	Not Found	Not Found	Not Found	Not Found	Not Found	Not Found	Not Found	Not Found	High	Not Found	Not Found	Not Found	High	High	High	High	High	High	High	High	High	High	High	High	High	High	High	High	High	High	High
Checked	Protein Group ID	# Proteins	# Unique Peptides	# Peptides	# PSMs	Group Description	Mouse_Cell_661W_TMT_1_HpH_Fract_1.raw	Mouse_Cell_661W_TMT_1_HpH_Fract_10.raw	Mouse_Cell_661W_TMT_1_HpH_Fract_11.raw	Mouse_Cell_661W_TMT_1_HpH_Fract_12.raw	Mouse_Cell_661W_TMT_1_HpH_Fract_13.raw	Mouse_Cell_661W_TMT_1_HpH_Fract_14.raw	Mouse_Cell_661W_TMT_1_HpH_Fract_15.raw	Mouse_Cell_661W_TMT_1_HpH_Fract_16.raw	Mouse_Cell_661W_TMT_1_HpH_Fract_17.raw	Mouse_Cell_661W_TMT_1_HpH_Fract_2.raw	Mouse_Cell_661W_TMT_1_HpH_Fract_3.raw	Mouse_Cell_661W_TMT_1_HpH_Fract_4.raw	Mouse_Cell_661W_TMT_1_HpH_Fract_5.raw	Mouse_Cell_661W_TMT_1_HpH_Fract_6.raw	Mouse_Cell_661W_TMT_1_HpH_Fract_7.raw	Mouse_Cell_661W_TMT_1_HpH_Fract_8.raw	Mouse_Cell_661W_TMT_1_HpH_Fract_9.raw	Found in Sample: [S1] F1: 126, Control	Found in Sample: [S2] F1: 127N, Sample	Found in Sample: [S3] F1: 127C, Sample	Found in Sample: [S4] F1: 128N, Sample	Found in Sample: [S5] F1: 128C, Sample	Found in Sample: [S6] F1: 129N, Sample	Found in Sample: [S7] F1: 129C, Sample	Found in Sample: [S8] F1: 130N, Sample	Found in Sample: [S9] F1: 130C, Sample	Found in Sample: [S10] F1: 131, Sample	Found in Sample Group: F1, 126	Found in Sample Group: F1, 127N	Found in Sample Group: F1, 127C	Found in Sample Group: F1, 128N	Found in Sample Group: F1, 128C	Found in Sample Group: F1, 129N	Found in Sample Group: F1, 129C	Found in Sample Group: F1, 130N	Found in Sample Group: F1, 130C	Found in Sample Group: F1, 131
	3640	4	1	1	1	[Master Protein] LIM domain kinase 2 OS=Mus musculus OX=10090 GN=Limk2 PE=1 SV=2	Not Found	Not Found	Not Found	Not Found	Not Found	Not Found	Not Found	Not Found	Not Found	Not Found	Not Found	Not Found	Not Found	High	Not Found	Not Found	Not Found	High	High	High	High	High	High	High	High	High	High	High	High	High	High	High	High	High	High	High	High
	Checked	Confidence	Sequence	Modifications	Qvality PEP	Qvality q-value	# Protein Groups	# Proteins	# PSMs	Master Protein Accessions	# Missed Cleavages	Theo. MH+ [Da]	Mouse_Cell_661W_TMT_1_HpH_Fract_1.raw	Mouse_Cell_661W_TMT_1_HpH_Fract_10.raw	Mouse_Cell_661W_TMT_1_HpH_Fract_11.raw	Mouse_Cell_661W_TMT_1_HpH_Fract_12.raw	Mouse_Cell_661W_TMT_1_HpH_Fract_13.raw	Mouse_Cell_661W_TMT_1_HpH_Fract_14.raw	Mouse_Cell_661W_TMT_1_HpH_Fract_15.raw	Mouse_Cell_661W_TMT_1_HpH_Fract_16.raw	Mouse_Cell_661W_TMT_1_HpH_Fract_17.raw	Mouse_Cell_661W_TMT_1_HpH_Fract_2.raw	Mouse_Cell_661W_TMT_1_HpH_Fract_3.raw	Mouse_Cell_661W_TMT_1_HpH_Fract_4.raw	Mouse_Cell_661W_TMT_1_HpH_Fract_5.raw	Mouse_Cell_661W_TMT_1_HpH_Fract_6.raw	Mouse_Cell_661W_TMT_1_HpH_Fract_7.raw	Mouse_Cell_661W_TMT_1_HpH_Fract_8.raw	Mouse_Cell_661W_TMT_1_HpH_Fract_9.raw	Found in Sample: [S1] F1: 126, Control	Found in Sample: [S2] F1: 127N, Sample	Found in Sample: [S3] F1: 127C, Sample	Found in Sample: [S4] F1: 128N, Sample	Found in Sample: [S5] F1: 128C, Sample	Found in Sample: [S6] F1: 129N, Sample	Found in Sample: [S7] F1: 129C, Sample	Found in Sample: [S8] F1: 130N, Sample	Found in Sample: [S9] F1: 130C, Sample	Found in Sample: [S10] F1: 131, Sample	Found in Sample Group: F1, 126	Found in Sample Group: F1, 127N	Found in Sample Group: F1, 127C	Found in Sample Group: F1, 128N	Found in Sample Group: F1, 128C	Found in Sample Group: F1, 129N	Found in Sample Group: F1, 129C	Found in Sample Group: F1, 130N	Found in Sample Group: F1, 130C	Found in Sample Group: F1, 131
		High	LNLLTEYIEGGTLK	2xTMT6plex [N-Term; K14]	0.000383439	6.50205e-05	1	4	1	O54785	0	2022.19	Not Found	Not Found	Not Found	Not Found	Not Found	Not Found	Not Found	Not Found	Not Found	Not Found	Not Found	Not Found	Not Found	High	Not Found	Not Found	Not Found	High	High	High	High	High	High	High	High	High	High	High	High	High	High	High	High	High	High	High	High
High	Master Protein	Q8BK03	Mitoguardin 2 OS=Mus musculus OX=10090 GN=Miga2 PE=1 SV=1	0	7.54571	2.69815	1	4	1	1	593	65.506	5.41	Not Found	Not Found	Not Found	Not Found	Not Found	Not Found	Not Found	Not Found	Not Found	High	Not Found	Not Found	Not Found	Not Found	Not Found	Not Found	Not Found	High	High	High	High	High	High	High	High	High	High	High	High	High	High	High	High	High	High	High
Checked	Protein Group ID	# Proteins	# Unique Peptides	# Peptides	# PSMs	Group Description	Mouse_Cell_661W_TMT_1_HpH_Fract_1.raw	Mouse_Cell_661W_TMT_1_HpH_Fract_10.raw	Mouse_Cell_661W_TMT_1_HpH_Fract_11.raw	Mouse_Cell_661W_TMT_1_HpH_Fract_12.raw	Mouse_Cell_661W_TMT_1_HpH_Fract_13.raw	Mouse_Cell_661W_TMT_1_HpH_Fract_14.raw	Mouse_Cell_661W_TMT_1_HpH_Fract_15.raw	Mouse_Cell_661W_TMT_1_HpH_Fract_16.raw	Mouse_Cell_661W_TMT_1_HpH_Fract_17.raw	Mouse_Cell_661W_TMT_1_HpH_Fract_2.raw	Mouse_Cell_661W_TMT_1_HpH_Fract_3.raw	Mouse_Cell_661W_TMT_1_HpH_Fract_4.raw	Mouse_Cell_661W_TMT_1_HpH_Fract_5.raw	Mouse_Cell_661W_TMT_1_HpH_Fract_6.raw	Mouse_Cell_661W_TMT_1_HpH_Fract_7.raw	Mouse_Cell_661W_TMT_1_HpH_Fract_8.raw	Mouse_Cell_661W_TMT_1_HpH_Fract_9.raw	Found in Sample: [S1] F1: 126, Control	Found in Sample: [S2] F1: 127N, Sample	Found in Sample: [S3] F1: 127C, Sample	Found in Sample: [S4] F1: 128N, Sample	Found in Sample: [S5] F1: 128C, Sample	Found in Sample: [S6] F1: 129N, Sample	Found in Sample: [S7] F1: 129C, Sample	Found in Sample: [S8] F1: 130N, Sample	Found in Sample: [S9] F1: 130C, Sample	Found in Sample: [S10] F1: 131, Sample	Found in Sample Group: F1, 126	Found in Sample Group: F1, 127N	Found in Sample Group: F1, 127C	Found in Sample Group: F1, 128N	Found in Sample Group: F1, 128C	Found in Sample Group: F1, 129N	Found in Sample Group: F1, 129C	Found in Sample Group: F1, 130N	Found in Sample Group: F1, 130C	Found in Sample Group: F1, 131
	3639	2	1	1	4	[Master Protein] Mitoguardin 2 OS=Mus musculus OX=10090 GN=Miga2 PE=1 SV=1	Not Found	Not Found	Not Found	Not Found	Not Found	Not Found	Not Found	Not Found	Not Found	High	Not Found	Not Found	Not Found	Not Found	Not Found	Not Found	Not Found	High	High	High	High	High	High	High	High	High	High	High	High	High	High	High	High	High	High	High	High
	Checked	Confidence	Sequence	Modifications	Qvality PEP	Qvality q-value	# Protein Groups	# Proteins	# PSMs	Master Protein Accessions	# Missed Cleavages	Theo. MH+ [Da]	Mouse_Cell_661W_TMT_1_HpH_Fract_1.raw	Mouse_Cell_661W_TMT_1_HpH_Fract_10.raw	Mouse_Cell_661W_TMT_1_HpH_Fract_11.raw	Mouse_Cell_661W_TMT_1_HpH_Fract_12.raw	Mouse_Cell_661W_TMT_1_HpH_Fract_13.raw	Mouse_Cell_661W_TMT_1_HpH_Fract_14.raw	Mouse_Cell_661W_TMT_1_HpH_Fract_15.raw	Mouse_Cell_661W_TMT_1_HpH_Fract_16.raw	Mouse_Cell_661W_TMT_1_HpH_Fract_17.raw	Mouse_Cell_661W_TMT_1_HpH_Fract_2.raw	Mouse_Cell_661W_TMT_1_HpH_Fract_3.raw	Mouse_Cell_661W_TMT_1_HpH_Fract_4.raw	Mouse_Cell_661W_TMT_1_HpH_Fract_5.raw	Mouse_Cell_661W_TMT_1_HpH_Fract_6.raw	Mouse_Cell_661W_TMT_1_HpH_Fract_7.raw	Mouse_Cell_661W_TMT_1_HpH_Fract_8.raw	Mouse_Cell_661W_TMT_1_HpH_Fract_9.raw	Found in Sample: [S1] F1: 126, Control	Found in Sample: [S2] F1: 127N, Sample	Found in Sample: [S3] F1: 127C, Sample	Found in Sample: [S4] F1: 128N, Sample	Found in Sample: [S5] F1: 128C, Sample	Found in Sample: [S6] F1: 129N, Sample	Found in Sample: [S7] F1: 129C, Sample	Found in Sample: [S8] F1: 130N, Sample	Found in Sample: [S9] F1: 130C, Sample	Found in Sample: [S10] F1: 131, Sample	Found in Sample Group: F1, 126	Found in Sample Group: F1, 127N	Found in Sample Group: F1, 127C	Found in Sample Group: F1, 128N	Found in Sample Group: F1, 128C	Found in Sample Group: F1, 129N	Found in Sample Group: F1, 129C	Found in Sample Group: F1, 130N	Found in Sample Group: F1, 130C	Found in Sample Group: F1, 131
		High	YTSVPALAEDILQLSR	1xTMT6plex [N-Term]	1.65622e-05	0	1	2	4	Q8BK03	0	2005.12	Not Found	Not Found	Not Found	Not Found	Not Found	Not Found	Not Found	Not Found	Not Found	High	Not Found	Not Found	Not Found	Not Found	Not Found	Not Found	Not Found	High	High	High	High	High	High	High	High	High	High	High	High	High	High	High	High	High	High	High	High
High	Master Protein	Q91Z50	Flap endonuclease 1 OS=Mus musculus OX=10090 GN=Fen1 PE=1 SV=1	0	56.8803	31.8421	7	16	7	1	380	42.596	8.34	High	Not Found	Not Found	High	Not Found	High	Not Found	Not Found	Not Found	Not Found	Not Found	High	High	High	Not Found	High	Not Found	High	High	High	High	High	High	High	High	High	High	High	High	High	High	High	High	High	High	High
Checked	Protein Group ID	# Proteins	# Unique Peptides	# Peptides	# PSMs	Group Description	Mouse_Cell_661W_TMT_1_HpH_Fract_1.raw	Mouse_Cell_661W_TMT_1_HpH_Fract_10.raw	Mouse_Cell_661W_TMT_1_HpH_Fract_11.raw	Mouse_Cell_661W_TMT_1_HpH_Fract_12.raw	Mouse_Cell_661W_TMT_1_HpH_Fract_13.raw	Mouse_Cell_661W_TMT_1_HpH_Fract_14.raw	Mouse_Cell_661W_TMT_1_HpH_Fract_15.raw	Mouse_Cell_661W_TMT_1_HpH_Fract_16.raw	Mouse_Cell_661W_TMT_1_HpH_Fract_17.raw	Mouse_Cell_661W_TMT_1_HpH_Fract_2.raw	Mouse_Cell_661W_TMT_1_HpH_Fract_3.raw	Mouse_Cell_661W_TMT_1_HpH_Fract_4.raw	Mouse_Cell_661W_TMT_1_HpH_Fract_5.raw	Mouse_Cell_661W_TMT_1_HpH_Fract_6.raw	Mouse_Cell_661W_TMT_1_HpH_Fract_7.raw	Mouse_Cell_661W_TMT_1_HpH_Fract_8.raw	Mouse_Cell_661W_TMT_1_HpH_Fract_9.raw	Found in Sample: [S1] F1: 126, Control	Found in Sample: [S2] F1: 127N, Sample	Found in Sample: [S3] F1: 127C, Sample	Found in Sample: [S4] F1: 128N, Sample	Found in Sample: [S5] F1: 128C, Sample	Found in Sample: [S6] F1: 129N, Sample	Found in Sample: [S7] F1: 129C, Sample	Found in Sample: [S8] F1: 130N, Sample	Found in Sample: [S9] F1: 130C, Sample	Found in Sample: [S10] F1: 131, Sample	Found in Sample Group: F1, 126	Found in Sample Group: F1, 127N	Found in Sample Group: F1, 127C	Found in Sample Group: F1, 128N	Found in Sample Group: F1, 128C	Found in Sample Group: F1, 129N	Found in Sample Group: F1, 129C	Found in Sample Group: F1, 130N	Found in Sample Group: F1, 130C	Found in Sample Group: F1, 131
	3638	2	7	7	19	[Master Protein] Flap endonuclease 1 OS=Mus musculus OX=10090 GN=Fen1 PE=1 SV=1	High	Not Found	Not Found	High	Not Found	High	Not Found	Not Found	Not Found	Not Found	Not Found	High	High	High	Not Found	High	Not Found	High	High	High	High	High	High	High	High	High	High	High	High	High	High	High	High	High	High	High	High
	Checked	Confidence	Sequence	Modifications	Qvality PEP	Qvality q-value	# Protein Groups	# Proteins	# PSMs	Master Protein Accessions	# Missed Cleavages	Theo. MH+ [Da]	Mouse_Cell_661W_TMT_1_HpH_Fract_1.raw	Mouse_Cell_661W_TMT_1_HpH_Fract_10.raw	Mouse_Cell_661W_TMT_1_HpH_Fract_11.raw	Mouse_Cell_661W_TMT_1_HpH_Fract_12.raw	Mouse_Cell_661W_TMT_1_HpH_Fract_13.raw	Mouse_Cell_661W_TMT_1_HpH_Fract_14.raw	Mouse_Cell_661W_TMT_1_HpH_Fract_15.raw	Mouse_Cell_661W_TMT_1_HpH_Fract_16.raw	Mouse_Cell_661W_TMT_1_HpH_Fract_17.raw	Mouse_Cell_661W_TMT_1_HpH_Fract_2.raw	Mouse_Cell_661W_TMT_1_HpH_Fract_3.raw	Mouse_Cell_661W_TMT_1_HpH_Fract_4.raw	Mouse_Cell_661W_TMT_1_HpH_Fract_5.raw	Mouse_Cell_661W_TMT_1_HpH_Fract_6.raw	Mouse_Cell_661W_TMT_1_HpH_Fract_7.raw	Mouse_Cell_661W_TMT_1_HpH_Fract_8.raw	Mouse_Cell_661W_TMT_1_HpH_Fract_9.raw	Found in Sample: [S1] F1: 126, Control	Found in Sample: [S2] F1: 127N, Sample	Found in Sample: [S3] F1: 127C, Sample	Found in Sample: [S4] F1: 128N, Sample	Found in Sample: [S5] F1: 128C, Sample	Found in Sample: [S6] F1: 129N, Sample	Found in Sample: [S7] F1: 129C, Sample	Found in Sample: [S8] F1: 130N, Sample	Found in Sample: [S9] F1: 130C, Sample	Found in Sample: [S10] F1: 131, Sample	Found in Sample Group: F1, 126	Found in Sample Group: F1, 127N	Found in Sample Group: F1, 127C	Found in Sample Group: F1, 128N	Found in Sample Group: F1, 128C	Found in Sample Group: F1, 129N	Found in Sample Group: F1, 129C	Found in Sample Group: F1, 130N	Found in Sample Group: F1, 130C	Found in Sample Group: F1, 131
		High	WSEPNEEELVK	2xTMT6plex [N-Term; K11]	4.32949e-05	0	1	2	2	Q91Z50	0	1817.97	Not Found	Not Found	Not Found	Not Found	Not Found	High	Not Found	Not Found	Not Found	Not Found	Not Found	Not Found	Not Found	Not Found	Not Found	Not Found	Not Found	High	High	High	High	High	High	High	High	High	High	High	High	High	High	High	High	High	High	High	High
		High	LIADVAPSAIR	1xTMT6plex [N-Term]	3.00895e-05	0	1	2	2	Q91Z50	0	1354.83	Not Found	Not Found	Not Found	Not Found	Not Found	High	Not Found	Not Found	Not Found	Not Found	Not Found	Not Found	Not Found	Not Found	Not Found	Not Found	Not Found	High	High	High	High	High	High	High	High	High	High	High	High	High	High	High	High	High	High	High	High
		High	QGGDVLQNEEGETTSHLMGMFYR	1xOxidation [M]; 1xDeamidated [N8]; 1xTMT6plex [N-Term]	0.000124221	0	1	1	2	Q91Z50	0	2845.3	Not Found	Not Found	Not Found	High	Not Found	Not Found	Not Found	Not Found	Not Found	Not Found	Not Found	Not Found	Not Found	Not Found	Not Found	Not Found	Not Found	High	High	High	High	High	High	High	High	High	High	High	High	High	High	High	High	High	High	High	High
		High	QGGDVLQNEEGETTSHLMGMFYR	1xTMT6plex [N-Term]	1.28064e-07	0	1	1	1	Q91Z50	0	2828.32	Not Found	Not Found	Not Found	High	Not Found	Not Found	Not Found	Not Found	Not Found	Not Found	Not Found	Not Found	Not Found	Not Found	Not Found	Not Found	Not Found	High	High	High	High	High	High	High	High	High	High	High	High	High	High	High	High	High	High	High	High
		High	HLLSLMGIPYLDAPSEAEASCAALAK	1xCarbamidomethyl [C21]; 2xTMT6plex [N-Term; K26]	3.02625e-06	0	1	2	1	Q91Z50	0	3186.69	Not Found	Not Found	Not Found	Not Found	Not Found	Not Found	Not Found	Not Found	Not Found	Not Found	Not Found	Not Found	Not Found	High	Not Found	Not Found	Not Found	High	High	High	High	High	High	High	High	High	High	High	High	High	High	High	High	High	High	High	High
		High	EAQQLFLEPEVLDPESVELK	2xTMT6plex [N-Term; K20]	2.89528e-08	0	1	1	4	Q91Z50	0	2771.51	Not Found	Not Found	Not Found	Not Found	Not Found	Not Found	Not Found	Not Found	Not Found	Not Found	Not Found	High	High	Not Found	Not Found	Not Found	Not Found	High	High	High	High	High	High	High	High	High	High	High	High	High	High	High	High	High	High	High	High
		High	EAQQLFLEPEVLDPESVELK	1xTMT6plex [N-Term]	5.97518e-08	0	1	1	2	Q91Z50	0	2542.35	High	Not Found	Not Found	Not Found	Not Found	Not Found	Not Found	Not Found	Not Found	Not Found	Not Found	Not Found	Not Found	Not Found	Not Found	Not Found	Not Found	High	High	High	High	High	High	High	High	High	High	High	High	High	High	High	High	High	High	High	High
		High	VYAAATEDMDCLTFGSPVLMR	1xOxidation [M20]; 1xCarbamidomethyl [C11]; 1xTMT6plex [N-Term]	0.000475255	9.38446e-05	1	2	2	Q91Z50	0	2592.23	Not Found	Not Found	Not Found	Not Found	Not Found	Not Found	Not Found	Not Found	Not Found	Not Found	Not Found	Not Found	Not Found	High	Not Found	Not Found	Not Found	High	High	High	High	High	High	High	High	High	High	High	High	High	High	High	High	High	High	High	High
		High	WSEPNEEELVK	1xTMT6plex [N-Term]	0.000392719	9.38446e-05	1	2	2	Q91Z50	0	1588.81	Not Found	Not Found	Not Found	Not Found	Not Found	Not Found	Not Found	Not Found	Not Found	Not Found	Not Found	Not Found	Not Found	Not Found	Not Found	High	Not Found	High	High	High	High	High	High	High	High	High	High	High	High	High	High	High	High	High	High	High	High
		High	VTGSLSSAK	1xTMT6plex [K9]	0.0601414	0.00534277	1	2	1	Q91Z50	0	1078.63	High	Not Found	Not Found	Not Found	Not Found	Not Found	Not Found	Not Found	Not Found	Not Found	Not Found	Not Found	Not Found	Not Found	Not Found	Not Found	Not Found	High	High	High	High	High	High	High	High	High	High	High	High	High	High	High	High	High	High	High	High
High	Master Protein	A2AJ15	Endoplasmic reticulum mannosyl-oligosaccharide 1,2-alpha-mannosidase OS=Mus musculus OX=10090 GN=Man1b1 PE=1 SV=1	0	11.8517	5.16717	3	4	3	1	658	75.103	8.48	Not Found	Not Found	Not Found	Not Found	Not Found	Not Found	Not Found	Not Found	Not Found	Not Found	Not Found	Not Found	Not Found	Not Found	Not Found	High	Not Found	High	High	High	High	High	High	High	High	High	High	High	High	High	High	High	High	High	High	High
Checked	Protein Group ID	# Proteins	# Unique Peptides	# Peptides	# PSMs	Group Description	Mouse_Cell_661W_TMT_1_HpH_Fract_1.raw	Mouse_Cell_661W_TMT_1_HpH_Fract_10.raw	Mouse_Cell_661W_TMT_1_HpH_Fract_11.raw	Mouse_Cell_661W_TMT_1_HpH_Fract_12.raw	Mouse_Cell_661W_TMT_1_HpH_Fract_13.raw	Mouse_Cell_661W_TMT_1_HpH_Fract_14.raw	Mouse_Cell_661W_TMT_1_HpH_Fract_15.raw	Mouse_Cell_661W_TMT_1_HpH_Fract_16.raw	Mouse_Cell_661W_TMT_1_HpH_Fract_17.raw	Mouse_Cell_661W_TMT_1_HpH_Fract_2.raw	Mouse_Cell_661W_TMT_1_HpH_Fract_3.raw	Mouse_Cell_661W_TMT_1_HpH_Fract_4.raw	Mouse_Cell_661W_TMT_1_HpH_Fract_5.raw	Mouse_Cell_661W_TMT_1_HpH_Fract_6.raw	Mouse_Cell_661W_TMT_1_HpH_Fract_7.raw	Mouse_Cell_661W_TMT_1_HpH_Fract_8.raw	Mouse_Cell_661W_TMT_1_HpH_Fract_9.raw	Found in Sample: [S1] F1: 126, Control	Found in Sample: [S2] F1: 127N, Sample	Found in Sample: [S3] F1: 127C, Sample	Found in Sample: [S4] F1: 128N, Sample	Found in Sample: [S5] F1: 128C, Sample	Found in Sample: [S6] F1: 129N, Sample	Found in Sample: [S7] F1: 129C, Sample	Found in Sample: [S8] F1: 130N, Sample	Found in Sample: [S9] F1: 130C, Sample	Found in Sample: [S10] F1: 131, Sample	Found in Sample Group: F1, 126	Found in Sample Group: F1, 127N	Found in Sample Group: F1, 127C	Found in Sample Group: F1, 128N	Found in Sample Group: F1, 128C	Found in Sample Group: F1, 129N	Found in Sample Group: F1, 129C	Found in Sample Group: F1, 130N	Found in Sample Group: F1, 130C	Found in Sample Group: F1, 131
	3637	1	3	3	4	[Master Protein] Endoplasmic reticulum mannosyl-oligosaccharide 1,2-alpha-mannosidase OS=Mus musculus OX=10090 GN=Man1b1 PE=1 SV=1	Not Found	Not Found	Not Found	Not Found	Not Found	Not Found	Not Found	Not Found	Not Found	Not Found	Not Found	Not Found	Not Found	Not Found	Not Found	High	Not Found	High	High	High	High	High	High	High	High	High	High	High	High	High	High	High	High	High	High	High	High
	Checked	Confidence	Sequence	Modifications	Qvality PEP	Qvality q-value	# Protein Groups	# Proteins	# PSMs	Master Protein Accessions	# Missed Cleavages	Theo. MH+ [Da]	Mouse_Cell_661W_TMT_1_HpH_Fract_1.raw	Mouse_Cell_661W_TMT_1_HpH_Fract_10.raw	Mouse_Cell_661W_TMT_1_HpH_Fract_11.raw	Mouse_Cell_661W_TMT_1_HpH_Fract_12.raw	Mouse_Cell_661W_TMT_1_HpH_Fract_13.raw	Mouse_Cell_661W_TMT_1_HpH_Fract_14.raw	Mouse_Cell_661W_TMT_1_HpH_Fract_15.raw	Mouse_Cell_661W_TMT_1_HpH_Fract_16.raw	Mouse_Cell_661W_TMT_1_HpH_Fract_17.raw	Mouse_Cell_661W_TMT_1_HpH_Fract_2.raw	Mouse_Cell_661W_TMT_1_HpH_Fract_3.raw	Mouse_Cell_661W_TMT_1_HpH_Fract_4.raw	Mouse_Cell_661W_TMT_1_HpH_Fract_5.raw	Mouse_Cell_661W_TMT_1_HpH_Fract_6.raw	Mouse_Cell_661W_TMT_1_HpH_Fract_7.raw	Mouse_Cell_661W_TMT_1_HpH_Fract_8.raw	Mouse_Cell_661W_TMT_1_HpH_Fract_9.raw	Found in Sample: [S1] F1: 126, Control	Found in Sample: [S2] F1: 127N, Sample	Found in Sample: [S3] F1: 127C, Sample	Found in Sample: [S4] F1: 128N, Sample	Found in Sample: [S5] F1: 128C, Sample	Found in Sample: [S6] F1: 129N, Sample	Found in Sample: [S7] F1: 129C, Sample	Found in Sample: [S8] F1: 130N, Sample	Found in Sample: [S9] F1: 130C, Sample	Found in Sample: [S10] F1: 131, Sample	Found in Sample Group: F1, 126	Found in Sample Group: F1, 127N	Found in Sample Group: F1, 127C	Found in Sample Group: F1, 128N	Found in Sample Group: F1, 128C	Found in Sample Group: F1, 129N	Found in Sample Group: F1, 129C	Found in Sample Group: F1, 130N	Found in Sample Group: F1, 130C	Found in Sample Group: F1, 131
		High	ETQLLEDYVK	2xTMT6plex [N-Term; K10]	1.03318e-05	0	1	1	1	A2AJ15	0	1695.96	Not Found	Not Found	Not Found	Not Found	Not Found	Not Found	Not Found	Not Found	Not Found	Not Found	Not Found	Not Found	Not Found	Not Found	Not Found	High	Not Found	High	High	High	High	High	High	High	High	High	High	High	High	High	High	High	High	High	High	High	High
		High	FQEAVEEVTK	2xTMT6plex [N-Term; K10]	2.87955e-05	0	1	1	2	A2AJ15	0	1637.92	Not Found	Not Found	Not Found	Not Found	Not Found	Not Found	Not Found	Not Found	Not Found	Not Found	Not Found	Not Found	Not Found	Not Found	Not Found	High	Not Found	High	High	High	High	High	High	High	High	High	High	High	High	High	High	High	High	High	High	High	High
		High	YQDWGWEILQSFNK	2xTMT6plex [N-Term; K14]	0.0120266	0.00120067	1	1	1	A2AJ15	0	2272.18	Not Found	Not Found	Not Found	Not Found	Not Found	Not Found	Not Found	Not Found	Not Found	Not Found	Not Found	Not Found	Not Found	Not Found	Not Found	High	Not Found	High	High	High	High	High	High	High	High	High	High	High	High	High	High	High	High	High	High	High	High
High	Master Protein	Q921L5	Conserved oligomeric Golgi complex subunit 2 OS=Mus musculus OX=10090 GN=Cog2 PE=1 SV=2	0	43.5381	16.8263	8	16	8	1	731	81.988	6.21	High	Not Found	Not Found	Not Found	High	High	Not Found	Not Found	Not Found	Not Found	High	Not Found	Not Found	High	High	Not Found	High	High	High	High	High	High	High	High	High	High	High	High	High	High	High	High	High	High	High	High
Checked	Protein Group ID	# Proteins	# Unique Peptides	# Peptides	# PSMs	Group Description	Mouse_Cell_661W_TMT_1_HpH_Fract_1.raw	Mouse_Cell_661W_TMT_1_HpH_Fract_10.raw	Mouse_Cell_661W_TMT_1_HpH_Fract_11.raw	Mouse_Cell_661W_TMT_1_HpH_Fract_12.raw	Mouse_Cell_661W_TMT_1_HpH_Fract_13.raw	Mouse_Cell_661W_TMT_1_HpH_Fract_14.raw	Mouse_Cell_661W_TMT_1_HpH_Fract_15.raw	Mouse_Cell_661W_TMT_1_HpH_Fract_16.raw	Mouse_Cell_661W_TMT_1_HpH_Fract_17.raw	Mouse_Cell_661W_TMT_1_HpH_Fract_2.raw	Mouse_Cell_661W_TMT_1_HpH_Fract_3.raw	Mouse_Cell_661W_TMT_1_HpH_Fract_4.raw	Mouse_Cell_661W_TMT_1_HpH_Fract_5.raw	Mouse_Cell_661W_TMT_1_HpH_Fract_6.raw	Mouse_Cell_661W_TMT_1_HpH_Fract_7.raw	Mouse_Cell_661W_TMT_1_HpH_Fract_8.raw	Mouse_Cell_661W_TMT_1_HpH_Fract_9.raw	Found in Sample: [S1] F1: 126, Control	Found in Sample: [S2] F1: 127N, Sample	Found in Sample: [S3] F1: 127C, Sample	Found in Sample: [S4] F1: 128N, Sample	Found in Sample: [S5] F1: 128C, Sample	Found in Sample: [S6] F1: 129N, Sample	Found in Sample: [S7] F1: 129C, Sample	Found in Sample: [S8] F1: 130N, Sample	Found in Sample: [S9] F1: 130C, Sample	Found in Sample: [S10] F1: 131, Sample	Found in Sample Group: F1, 126	Found in Sample Group: F1, 127N	Found in Sample Group: F1, 127C	Found in Sample Group: F1, 128N	Found in Sample Group: F1, 128C	Found in Sample Group: F1, 129N	Found in Sample Group: F1, 129C	Found in Sample Group: F1, 130N	Found in Sample Group: F1, 130C	Found in Sample Group: F1, 131
	3636	2	8	8	16	[Master Protein] Conserved oligomeric Golgi complex subunit 2 OS=Mus musculus OX=10090 GN=Cog2 PE=1 SV=2	High	Not Found	Not Found	Not Found	High	High	Not Found	Not Found	Not Found	Not Found	High	Not Found	Not Found	High	High	Not Found	High	High	High	High	High	High	High	High	High	High	High	High	High	High	High	High	High	High	High	High	High
	Checked	Confidence	Sequence	Modifications	Qvality PEP	Qvality q-value	# Protein Groups	# Proteins	# PSMs	Master Protein Accessions	# Missed Cleavages	Theo. MH+ [Da]	Mouse_Cell_661W_TMT_1_HpH_Fract_1.raw	Mouse_Cell_661W_TMT_1_HpH_Fract_10.raw	Mouse_Cell_661W_TMT_1_HpH_Fract_11.raw	Mouse_Cell_661W_TMT_1_HpH_Fract_12.raw	Mouse_Cell_661W_TMT_1_HpH_Fract_13.raw	Mouse_Cell_661W_TMT_1_HpH_Fract_14.raw	Mouse_Cell_661W_TMT_1_HpH_Fract_15.raw	Mouse_Cell_661W_TMT_1_HpH_Fract_16.raw	Mouse_Cell_661W_TMT_1_HpH_Fract_17.raw	Mouse_Cell_661W_TMT_1_HpH_Fract_2.raw	Mouse_Cell_661W_TMT_1_HpH_Fract_3.raw	Mouse_Cell_661W_TMT_1_HpH_Fract_4.raw	Mouse_Cell_661W_TMT_1_HpH_Fract_5.raw	Mouse_Cell_661W_TMT_1_HpH_Fract_6.raw	Mouse_Cell_661W_TMT_1_HpH_Fract_7.raw	Mouse_Cell_661W_TMT_1_HpH_Fract_8.raw	Mouse_Cell_661W_TMT_1_HpH_Fract_9.raw	Found in Sample: [S1] F1: 126, Control	Found in Sample: [S2] F1: 127N, Sample	Found in Sample: [S3] F1: 127C, Sample	Found in Sample: [S4] F1: 128N, Sample	Found in Sample: [S5] F1: 128C, Sample	Found in Sample: [S6] F1: 129N, Sample	Found in Sample: [S7] F1: 129C, Sample	Found in Sample: [S8] F1: 130N, Sample	Found in Sample: [S9] F1: 130C, Sample	Found in Sample: [S10] F1: 131, Sample	Found in Sample Group: F1, 126	Found in Sample Group: F1, 127N	Found in Sample Group: F1, 127C	Found in Sample Group: F1, 128N	Found in Sample Group: F1, 128C	Found in Sample Group: F1, 129N	Found in Sample Group: F1, 129C	Found in Sample Group: F1, 130N	Found in Sample Group: F1, 130C	Found in Sample Group: F1, 131
		High	ALNQLSVPLGQLR	1xTMT6plex [N-Term]	5.93703e-06	0	1	2	2	Q921L5	0	1637.99	Not Found	Not Found	Not Found	Not Found	Not Found	High	Not Found	Not Found	Not Found	Not Found	Not Found	Not Found	Not Found	Not Found	Not Found	Not Found	Not Found	High	High	High	High	High	High	High	High	High	High	High	High	High	High	High	High	High	High	High	High
		High	DVSSQEASSPLLTGQVLER	1xDeamidated [Q]; 1xTMT6plex [N-Term]	6.70935e-05	0	1	1	2	Q921L5	0	2246.17	Not Found	Not Found	Not Found	Not Found	Not Found	Not Found	Not Found	Not Found	Not Found	Not Found	Not Found	Not Found	Not Found	Not Found	Not Found	Not Found	High	High	High	High	High	High	High	High	High	High	High	High	High	High	High	High	High	High	High	High	High
		High	LQLALDVEHLGEQIQR	1xTMT6plex [N-Term]	3.91628e-05	0	1	1	2	Q921L5	0	2091.18	Not Found	Not Found	Not Found	Not Found	Not Found	Not Found	Not Found	Not Found	Not Found	Not Found	Not Found	Not Found	Not Found	High	Not Found	Not Found	Not Found	High	High	High	High	High	High	High	High	High	High	High	High	High	High	High	High	High	High	High	High
		High	YFETVSDVLNSVK	2xTMT6plex [N-Term; K13]	1.59488e-05	0	1	1	2	Q921L5	0	1959.08	Not Found	Not Found	Not Found	Not Found	Not Found	Not Found	Not Found	Not Found	Not Found	Not Found	High	Not Found	Not Found	Not Found	Not Found	Not Found	Not Found	High	High	High	High	High	High	High	High	High	High	High	High	High	High	High	High	High	High	High	High
		High	SSVSEGILAVDER	1xTMT6plex [N-Term]	1.39873e-07	0	1	1	2	Q921L5	0	1590.85	Not Found	Not Found	Not Found	Not Found	Not Found	Not Found	Not Found	Not Found	Not Found	Not Found	High	Not Found	Not Found	Not Found	Not Found	Not Found	Not Found	High	High	High	High	High	High	High	High	High	High	High	High	High	High	High	High	High	High	High	High
		High	LQEWLPDLLETVK	2xTMT6plex [N-Term; K13]	0.000198331	3.26555e-05	1	1	2	Q921L5	0	2042.19	Not Found	Not Found	Not Found	Not Found	High	High	Not Found	Not Found	Not Found	Not Found	Not Found	Not Found	Not Found	Not Found	Not Found	Not Found	Not Found	High	High	High	High	High	High	High	High	High	High	High	High	High	High	High	High	High	High	High	High
		High	LPSLFNPGDPDAFHQK	2xTMT6plex [N-Term; K16]	0.000486695	9.38446e-05	1	1	1	Q921L5	0	2241.21	High	Not Found	Not Found	Not Found	Not Found	Not Found	Not Found	Not Found	Not Found	Not Found	Not Found	Not Found	Not Found	Not Found	Not Found	Not Found	Not Found	High	High	High	High	High	High	High	High	High	High	High	High	High	High	High	High	High	High	High	High
		High	YFETVSDVLNSVK	1xDeamidated [N10]; 2xTMT6plex [N-Term; K13]	0.00334414	0.00040345	1	1	1	Q921L5	0	1960.07	Not Found	Not Found	Not Found	Not Found	Not Found	Not Found	Not Found	Not Found	Not Found	Not Found	High	Not Found	Not Found	Not Found	Not Found	Not Found	Not Found	High	High	High	High	High	High	High	High	High	High	High	High	High	High	High	High	High	High	High	High
		High	VQPAVMQSWLQEALSDSTHR	1xTMT6plex [N-Term]	0.0280567	0.00257589	1	1	2	Q921L5	0	2512.28	Not Found	Not Found	Not Found	Not Found	Not Found	Not Found	Not Found	Not Found	Not Found	Not Found	Not Found	Not Found	Not Found	Not Found	High	Not Found	Not Found	High	High	High	High	High	High	High	High	High	High	High	High	High	High	High	High	High	High	High	High
High	Master Protein	Q8BWT1	3-ketoacyl-CoA thiolase, mitochondrial OS=Mus musculus OX=10090 GN=Acaa2 PE=1 SV=3	0	178.277	66.4987	16	53	16	1	397	41.803	8.09	High	High	Not Found	High	High	Not Found	Not Found	Not Found	Not Found	High	High	High	Not Found	High	High	High	Not Found	High	High	High	High	High	High	High	High	High	High	High	High	High	High	High	High	High	High	High
Checked	Protein Group ID	# Proteins	# Unique Peptides	# Peptides	# PSMs	Group Description	Mouse_Cell_661W_TMT_1_HpH_Fract_1.raw	Mouse_Cell_661W_TMT_1_HpH_Fract_10.raw	Mouse_Cell_661W_TMT_1_HpH_Fract_11.raw	Mouse_Cell_661W_TMT_1_HpH_Fract_12.raw	Mouse_Cell_661W_TMT_1_HpH_Fract_13.raw	Mouse_Cell_661W_TMT_1_HpH_Fract_14.raw	Mouse_Cell_661W_TMT_1_HpH_Fract_15.raw	Mouse_Cell_661W_TMT_1_HpH_Fract_16.raw	Mouse_Cell_661W_TMT_1_HpH_Fract_17.raw	Mouse_Cell_661W_TMT_1_HpH_Fract_2.raw	Mouse_Cell_661W_TMT_1_HpH_Fract_3.raw	Mouse_Cell_661W_TMT_1_HpH_Fract_4.raw	Mouse_Cell_661W_TMT_1_HpH_Fract_5.raw	Mouse_Cell_661W_TMT_1_HpH_Fract_6.raw	Mouse_Cell_661W_TMT_1_HpH_Fract_7.raw	Mouse_Cell_661W_TMT_1_HpH_Fract_8.raw	Mouse_Cell_661W_TMT_1_HpH_Fract_9.raw	Found in Sample: [S1] F1: 126, Control	Found in Sample: [S2] F1: 127N, Sample	Found in Sample: [S3] F1: 127C, Sample	Found in Sample: [S4] F1: 128N, Sample	Found in Sample: [S5] F1: 128C, Sample	Found in Sample: [S6] F1: 129N, Sample	Found in Sample: [S7] F1: 129C, Sample	Found in Sample: [S8] F1: 130N, Sample	Found in Sample: [S9] F1: 130C, Sample	Found in Sample: [S10] F1: 131, Sample	Found in Sample Group: F1, 126	Found in Sample Group: F1, 127N	Found in Sample Group: F1, 127C	Found in Sample Group: F1, 128N	Found in Sample Group: F1, 128C	Found in Sample Group: F1, 129N	Found in Sample Group: F1, 129C	Found in Sample Group: F1, 130N	Found in Sample Group: F1, 130C	Found in Sample Group: F1, 131
	3635	1	16	16	53	[Master Protein] 3-ketoacyl-CoA thiolase, mitochondrial OS=Mus musculus OX=10090 GN=Acaa2 PE=1 SV=3	High	High	Not Found	High	High	Not Found	Not Found	Not Found	Not Found	High	High	High	Not Found	High	High	High	Not Found	High	High	High	High	High	High	High	High	High	High	High	High	High	High	High	High	High	High	High	High
	Checked	Confidence	Sequence	Modifications	Qvality PEP	Qvality q-value	# Protein Groups	# Proteins	# PSMs	Master Protein Accessions	# Missed Cleavages	Theo. MH+ [Da]	Mouse_Cell_661W_TMT_1_HpH_Fract_1.raw	Mouse_Cell_661W_TMT_1_HpH_Fract_10.raw	Mouse_Cell_661W_TMT_1_HpH_Fract_11.raw	Mouse_Cell_661W_TMT_1_HpH_Fract_12.raw	Mouse_Cell_661W_TMT_1_HpH_Fract_13.raw	Mouse_Cell_661W_TMT_1_HpH_Fract_14.raw	Mouse_Cell_661W_TMT_1_HpH_Fract_15.raw	Mouse_Cell_661W_TMT_1_HpH_Fract_16.raw	Mouse_Cell_661W_TMT_1_HpH_Fract_17.raw	Mouse_Cell_661W_TMT_1_HpH_Fract_2.raw	Mouse_Cell_661W_TMT_1_HpH_Fract_3.raw	Mouse_Cell_661W_TMT_1_HpH_Fract_4.raw	Mouse_Cell_661W_TMT_1_HpH_Fract_5.raw	Mouse_Cell_661W_TMT_1_HpH_Fract_6.raw	Mouse_Cell_661W_TMT_1_HpH_Fract_7.raw	Mouse_Cell_661W_TMT_1_HpH_Fract_8.raw	Mouse_Cell_661W_TMT_1_HpH_Fract_9.raw	Found in Sample: [S1] F1: 126, Control	Found in Sample: [S2] F1: 127N, Sample	Found in Sample: [S3] F1: 127C, Sample	Found in Sample: [S4] F1: 128N, Sample	Found in Sample: [S5] F1: 128C, Sample	Found in Sample: [S6] F1: 129N, Sample	Found in Sample: [S7] F1: 129C, Sample	Found in Sample: [S8] F1: 130N, Sample	Found in Sample: [S9] F1: 130C, Sample	Found in Sample: [S10] F1: 131, Sample	Found in Sample Group: F1, 126	Found in Sample Group: F1, 127N	Found in Sample Group: F1, 127C	Found in Sample Group: F1, 128N	Found in Sample Group: F1, 128C	Found in Sample Group: F1, 129N	Found in Sample Group: F1, 129C	Found in Sample Group: F1, 130N	Found in Sample Group: F1, 130C	Found in Sample Group: F1, 131
		High	TPFGAYGGLLK	2xTMT6plex [N-Term; K11]	1.80542e-06	0	1	1	2	Q8BWT1	0	1581.94	Not Found	Not Found	Not Found	Not Found	High	Not Found	Not Found	Not Found	Not Found	Not Found	Not Found	Not Found	Not Found	Not Found	Not Found	Not Found	Not Found	High	High	High	High	High	High	High	High	High	High	High	High	High	High	High	High	High	High	High	High
		High	VVGYFVSGCDPTIMGIGPVPAINGALK	1xOxidation [M14]; 1xDeamidated [N23]; 1xCarbamidomethyl [C9]; 2xTMT6plex [N-Term; K27]	8.50021e-06	0	1	1	1	Q8BWT1	0	3207.72	Not Found	Not Found	Not Found	High	Not Found	Not Found	Not Found	Not Found	Not Found	Not Found	Not Found	Not Found	Not Found	Not Found	Not Found	Not Found	Not Found	High	High	High	High	High	High	High	High	High	High	High	High	High	High	High	High	High	High	High	High
		High	VVGYFVSGCDPTIMGIGPVPAINGALK	1xDeamidated [N23]; 1xCarbamidomethyl [C9]; 2xTMT6plex [N-Term; K27]	2.46106e-05	0	1	1	1	Q8BWT1	0	3191.72	Not Found	Not Found	Not Found	High	Not Found	Not Found	Not Found	Not Found	Not Found	Not Found	Not Found	Not Found	Not Found	Not Found	Not Found	Not Found	Not Found	High	High	High	High	High	High	High	High	High	High	High	High	High	High	High	High	High	High	High	High
		High	VVGYFVSGCDPTIMGIGPVPAINGALK	1xCarbamidomethyl [C9]; 2xTMT6plex [N-Term; K27]	5.91985e-07	0	1	1	1	Q8BWT1	0	3190.74	Not Found	Not Found	Not Found	High	Not Found	Not Found	Not Found	Not Found	Not Found	Not Found	Not Found	Not Found	Not Found	Not Found	Not Found	Not Found	Not Found	High	High	High	High	High	High	High	High	High	High	High	High	High	High	High	High	High	High	High	High
		High	DMDLIDVNEAFAPQFLSVQK	1xOxidation [M2]; 1xDeamidated [N8]; 2xTMT6plex [N-Term; K20]	4.30611e-06	0	1	1	1	Q8BWT1	0	2755.43	Not Found	Not Found	Not Found	Not Found	Not Found	Not Found	Not Found	Not Found	Not Found	Not Found	Not Found	Not Found	Not Found	Not Found	High	Not Found	Not Found	High	High	High	High	High	High	High	High	High	High	High	High	High	High	High	High	High	High	High	High
		High	DMDLIDVNEAFAPQFLSVQK	1xOxidation [M2]; 2xTMT6plex [N-Term; K20]	2.13261e-09	0	1	1	2	Q8BWT1	0	2754.44	Not Found	Not Found	Not Found	Not Found	Not Found	Not Found	Not Found	Not Found	Not Found	Not Found	High	Not Found	Not Found	High	Not Found	Not Found	Not Found	High	High	High	High	High	High	High	High	High	High	High	High	High	High	High	High	High	High	High	High
		High	DMDLIDVNEAFAPQFLSVQK	2xTMT6plex [N-Term; K20]	1.22167e-06	0	1	1	2	Q8BWT1	0	2738.45	Not Found	Not Found	Not Found	Not Found	Not Found	Not Found	Not Found	Not Found	Not Found	Not Found	Not Found	Not Found	Not Found	High	High	Not Found	Not Found	High	High	High	High	High	High	High	High	High	High	High	High	High	High	High	High	High	High	High	High
		High	LEDTLWAGLTDQHVK	2xTMT6plex [N-Term; K15]	1.20163e-05	0	1	1	2	Q8BWT1	0	2184.21	Not Found	Not Found	Not Found	Not Found	Not Found	Not Found	Not Found	Not Found	Not Found	Not Found	Not Found	Not Found	Not Found	High	Not Found	Not Found	Not Found	High	High	High	High	High	High	High	High	High	High	High	High	High	High	High	High	High	High	High	High
		High	QTMQVDEHARPQTTLEQLQK	2xDeamidated [Q12; Q17]; 2xTMT6plex [N-Term; K20]	3.4653e-07	0	1	1	1	Q8BWT1	0	2841.48	Not Found	Not Found	Not Found	Not Found	Not Found	Not Found	Not Found	Not Found	Not Found	Not Found	High	Not Found	Not Found	Not Found	Not Found	Not Found	Not Found	High	High	High	High	High	High	High	High	High	High	High	High	High	High	High	High	High	High	High	High
		High	DGTVTAGNASGVSDGAGAVIIASEDAVK	1xDeamidated [N8]; 2xTMT6plex [N-Term; K28]	1.22133e-08	0	1	1	2	Q8BWT1	0	2991.55	Not Found	Not Found	Not Found	Not Found	Not Found	Not Found	Not Found	Not Found	Not Found	Not Found	Not Found	Not Found	Not Found	High	Not Found	Not Found	Not Found	High	High	High	High	High	High	High	High	High	High	High	High	High	High	High	High	High	High	High	High
		High	DGTVTAGNASGVSDGAGAVIIASEDAVK	2xTMT6plex [N-Term; K28]	1.47441e-12	0	1	1	1	Q8BWT1	0	2990.57	Not Found	Not Found	Not Found	Not Found	Not Found	Not Found	Not Found	Not Found	Not Found	Not Found	Not Found	Not Found	Not Found	High	Not Found	Not Found	Not Found	High	High	High	High	High	High	High	High	High	High	High	High	High	High	High	High	High	High	High	High
		High	VPPETIDSVIVGNVMQSSSDAAYLAR	1xOxidation [M15]; 1xTMT6plex [N-Term]	3.97779e-11	0	1	1	4	Q8BWT1	0	2964.52	Not Found	Not Found	Not Found	Not Found	Not Found	Not Found	Not Found	Not Found	Not Found	Not Found	Not Found	High	Not Found	Not Found	Not Found	High	Not Found	High	High	High	High	High	High	High	High	High	High	High	High	High	High	High	High	High	High	High	High
		High	VPPETIDSVIVGNVMQSSSDAAYLAR	2xDeamidated [N13; Q16]; 1xTMT6plex [N-Term]	1.57494e-05	0	1	1	2	Q8BWT1	0	2950.49	Not Found	Not Found	Not Found	Not Found	Not Found	Not Found	Not Found	Not Found	Not Found	Not Found	Not Found	Not Found	Not Found	Not Found	Not Found	High	Not Found	High	High	High	High	High	High	High	High	High	High	High	High	High	High	High	High	High	High	High	High
		High	VPPETIDSVIVGNVMQSSSDAAYLAR	1xTMT6plex [N-Term]	4.54048e-11	0	1	1	2	Q8BWT1	0	2948.52	Not Found	Not Found	Not Found	Not Found	Not Found	Not Found	Not Found	Not Found	Not Found	Not Found	Not Found	Not Found	Not Found	Not Found	Not Found	High	Not Found	High	High	High	High	High	High	High	High	High	High	High	High	High	High	High	High	High	High	High	High
		High	AANEAGYFNEEMAPIEVKTK	1xOxidation [M12]; 1xTMT6plex [N-Term]	0.000128125	0	1	1	1	Q8BWT1	1	2457.22	Not Found	Not Found	Not Found	Not Found	Not Found	Not Found	Not Found	Not Found	Not Found	Not Found	Not Found	Not Found	Not Found	Not Found	High	Not Found	Not Found	High	High	High	High	High	High	High	High	High	High	High	High	High	High	High	High	High	High	High	High
		High	AANEAGYFNEEMAPIEVKTK	1xTMT6plex [N-Term]	4.2223e-05	0	1	1	1	Q8BWT1	1	2441.22	Not Found	Not Found	Not Found	Not Found	Not Found	Not Found	Not Found	Not Found	Not Found	Not Found	Not Found	Not Found	Not Found	Not Found	High	Not Found	Not Found	High	High	High	High	High	High	High	High	High	High	High	High	High	High	High	High	High	High	High	High
		High	AANEAGYFNEEMAPIEVK	1xOxidation [M12]; 1xDeamidated [N9]; 2xTMT6plex [N-Term; K18]	9.94888e-06	0	1	1	1	Q8BWT1	0	2458.22	Not Found	Not Found	Not Found	Not Found	Not Found	Not Found	Not Found	Not Found	Not Found	Not Found	High	Not Found	Not Found	Not Found	Not Found	Not Found	Not Found	High	High	High	High	High	High	High	High	High	High	High	High	High	High	High	High	High	High	High	High
		High	AANEAGYFNEEMAPIEVK	1xOxidation [M12]; 2xTMT6plex [N-Term; K18]	1.66305e-08	0	1	1	1	Q8BWT1	0	2457.24	Not Found	Not Found	Not Found	Not Found	Not Found	Not Found	Not Found	Not Found	Not Found	Not Found	Not Found	Not Found	Not Found	Not Found	High	Not Found	Not Found	High	High	High	High	High	High	High	High	High	High	High	High	High	High	High	High	High	High	High	High
		High	AANEAGYFNEEMAPIEVK	1xDeamidated [N9]; 2xTMT6plex [N-Term; K18]	1.98434e-06	0	1	1	2	Q8BWT1	0	2442.23	Not Found	Not Found	Not Found	Not Found	Not Found	Not Found	Not Found	Not Found	Not Found	Not Found	Not Found	Not Found	Not Found	Not Found	High	Not Found	Not Found	High	High	High	High	High	High	High	High	High	High	High	High	High	High	High	High	High	High	High	High
		High	AANEAGYFNEEMAPIEVK	2xTMT6plex [N-Term; K18]	1.3176e-06	0	1	1	1	Q8BWT1	0	2441.24	Not Found	Not Found	Not Found	Not Found	Not Found	Not Found	Not Found	Not Found	Not Found	Not Found	Not Found	Not Found	Not Found	Not Found	High	Not Found	Not Found	High	High	High	High	High	High	High	High	High	High	High	High	High	High	High	High	High	High	High	High
		High	DAEVVLCGGTESMSQSPYCVR	2xCarbamidomethyl [C7; C19]; 1xTMT6plex [N-Term]	7.378e-09	0	1	1	2	Q8BWT1	0	2574.18	Not Found	High	Not Found	Not Found	Not Found	Not Found	Not Found	Not Found	Not Found	Not Found	Not Found	Not Found	Not Found	Not Found	Not Found	Not Found	Not Found	High	High	High	High	High	High	High	High	High	High	High	High	High	High	High	High	High	High	High	High
		High	DFSATDLTEFAAR	1xTMT6plex [N-Term]	4.08073e-09	0	1	1	6	Q8BWT1	0	1672.84	Not Found	Not Found	Not Found	High	Not Found	Not Found	Not Found	Not Found	Not Found	Not Found	Not Found	Not Found	Not Found	Not Found	Not Found	Not Found	Not Found	High	High	High	High	High	High	High	High	High	High	High	High	High	High	High	High	High	High	High	High
		High	VGVPTETGALTLNR	1xTMT6plex [N-Term]	0.000213414	3.26555e-05	1	1	4	Q8BWT1	0	1656.95	Not Found	Not Found	Not Found	High	Not Found	Not Found	Not Found	Not Found	Not Found	Not Found	Not Found	Not Found	Not Found	Not Found	Not Found	Not Found	Not Found	High	High	High	High	High	High	High	High	High	High	High	High	High	High	High	High	High	High	High	High
		High	ITAHLVHELR	1xTMT6plex [N-Term]	0.000229603	3.26555e-05	1	1	3	Q8BWT1	0	1417.85	Not Found	Not Found	Not Found	Not Found	Not Found	Not Found	Not Found	Not Found	Not Found	High	Not Found	Not Found	Not Found	Not Found	Not Found	Not Found	Not Found	High	High	High	High	High	High	High	High	High	High	High	High	High	High	High	High	High	High	High	High
		High	LCGSGFQSIVSGCQEICSK	2xDeamidated [Q7; Q14]; 3xCarbamidomethyl [C2; C13; C17]; 2xTMT6plex [N-Term; K19]	0.00226497	0.000349957	1	1	1	Q8BWT1	0	2577.24	Not Found	Not Found	Not Found	Not Found	Not Found	Not Found	Not Found	Not Found	Not Found	Not Found	Not Found	High	Not Found	Not Found	Not Found	Not Found	Not Found	High	High	High	High	High	High	High	High	High	High	High	High	High	High	High	High	High	High	High	High
		High	QTMQVDEHARPQTTLEQLQK	1xOxidation [M3]; 2xTMT6plex [N-Term; K20]	0.00265757	0.000392305	1	1	1	Q8BWT1	0	2855.51	Not Found	Not Found	Not Found	Not Found	Not Found	Not Found	Not Found	Not Found	Not Found	Not Found	High	Not Found	Not Found	Not Found	Not Found	Not Found	Not Found	High	High	High	High	High	High	High	High	High	High	High	High	High	High	High	High	High	High	High	High
		High	AALSAGK	2xTMT6plex [N-Term; K7]	0.0213431	0.00205763	1	1	1	Q8BWT1	0	1075.69	Not Found	Not Found	Not Found	Not Found	Not Found	Not Found	Not Found	Not Found	Not Found	Not Found	Not Found	High	Not Found	Not Found	Not Found	Not Found	Not Found	High	High	High	High	High	High	High	High	High	High	High	High	High	High	High	High	High	High	High	High
		High	LPMGMTAENLAAK	2xOxidation [M3; M5]; 2xTMT6plex [N-Term; K13]	0.0261417	0.00238215	1	1	1	Q8BWT1	0	1837	High	Not Found	Not Found	Not Found	Not Found	Not Found	Not Found	Not Found	Not Found	Not Found	Not Found	Not Found	Not Found	Not Found	Not Found	Not Found	Not Found	High	High	High	High	High	High	High	High	High	High	High	High	High	High	High	High	High	High	High	High
		High	VPPETIDSVIVGNVMQSSSDAAYLAR	1xOxidation [M15]; 1xDeamidated [Q/N]; 1xTMT6plex [N-Term]	0.0441747	0.00398519	1	1	2	Q8BWT1	0	2965.5	Not Found	Not Found	Not Found	Not Found	Not Found	Not Found	Not Found	Not Found	Not Found	Not Found	Not Found	High	Not Found	Not Found	Not Found	Not Found	Not Found	High	High	High	High	High	High	High	High	High	High	High	High	High	High	High	High	High	High	High	High
		High	AANEAGYFNEEMAPIEVKTK	1xOxidation [M12]; 1xDeamidated [N9]; 1xTMT6plex [N-Term]	0.0647421	0.00555582	1	1	1	Q8BWT1	1	2458.2	Not Found	Not Found	Not Found	Not Found	Not Found	Not Found	Not Found	Not Found	Not Found	Not Found	High	Not Found	Not Found	Not Found	Not Found	Not Found	Not Found	High	High	High	High	High	High	High	High	High	High	High	High	High	High	High	High	High	High	High	High
High	Master Protein	P62264	40S ribosomal protein S14 OS=Mus musculus OX=10090 GN=Rps14 PE=1 SV=3	0	54.9208	36.4238	5	23	5	1	151	16.263	10.05	Not Found	Not Found	Not Found	Not Found	High	Not Found	Not Found	Not Found	Not Found	High	Not Found	High	High	Not Found	Not Found	High	High	High	High	High	High	High	High	High	High	High	High	High	High	High	High	High	High	High	High	High
Checked	Protein Group ID	# Proteins	# Unique Peptides	# Peptides	# PSMs	Group Description	Mouse_Cell_661W_TMT_1_HpH_Fract_1.raw	Mouse_Cell_661W_TMT_1_HpH_Fract_10.raw	Mouse_Cell_661W_TMT_1_HpH_Fract_11.raw	Mouse_Cell_661W_TMT_1_HpH_Fract_12.raw	Mouse_Cell_661W_TMT_1_HpH_Fract_13.raw	Mouse_Cell_661W_TMT_1_HpH_Fract_14.raw	Mouse_Cell_661W_TMT_1_HpH_Fract_15.raw	Mouse_Cell_661W_TMT_1_HpH_Fract_16.raw	Mouse_Cell_661W_TMT_1_HpH_Fract_17.raw	Mouse_Cell_661W_TMT_1_HpH_Fract_2.raw	Mouse_Cell_661W_TMT_1_HpH_Fract_3.raw	Mouse_Cell_661W_TMT_1_HpH_Fract_4.raw	Mouse_Cell_661W_TMT_1_HpH_Fract_5.raw	Mouse_Cell_661W_TMT_1_HpH_Fract_6.raw	Mouse_Cell_661W_TMT_1_HpH_Fract_7.raw	Mouse_Cell_661W_TMT_1_HpH_Fract_8.raw	Mouse_Cell_661W_TMT_1_HpH_Fract_9.raw	Found in Sample: [S1] F1: 126, Control	Found in Sample: [S2] F1: 127N, Sample	Found in Sample: [S3] F1: 127C, Sample	Found in Sample: [S4] F1: 128N, Sample	Found in Sample: [S5] F1: 128C, Sample	Found in Sample: [S6] F1: 129N, Sample	Found in Sample: [S7] F1: 129C, Sample	Found in Sample: [S8] F1: 130N, Sample	Found in Sample: [S9] F1: 130C, Sample	Found in Sample: [S10] F1: 131, Sample	Found in Sample Group: F1, 126	Found in Sample Group: F1, 127N	Found in Sample Group: F1, 127C	Found in Sample Group: F1, 128N	Found in Sample Group: F1, 128C	Found in Sample Group: F1, 129N	Found in Sample Group: F1, 129C	Found in Sample Group: F1, 130N	Found in Sample Group: F1, 130C	Found in Sample Group: F1, 131
	3651	3	5	5	23	[Master Protein] 40S ribosomal protein S14 OS=Mus musculus OX=10090 GN=Rps14 PE=1 SV=3	Not Found	Not Found	Not Found	Not Found	High	Not Found	Not Found	Not Found	Not Found	High	Not Found	High	High	Not Found	Not Found	High	High	High	High	High	High	High	High	High	High	High	High	High	High	High	High	High	High	High	High	High	High
	Checked	Confidence	Sequence	Modifications	Qvality PEP	Qvality q-value	# Protein Groups	# Proteins	# PSMs	Master Protein Accessions	# Missed Cleavages	Theo. MH+ [Da]	Mouse_Cell_661W_TMT_1_HpH_Fract_1.raw	Mouse_Cell_661W_TMT_1_HpH_Fract_10.raw	Mouse_Cell_661W_TMT_1_HpH_Fract_11.raw	Mouse_Cell_661W_TMT_1_HpH_Fract_12.raw	Mouse_Cell_661W_TMT_1_HpH_Fract_13.raw	Mouse_Cell_661W_TMT_1_HpH_Fract_14.raw	Mouse_Cell_661W_TMT_1_HpH_Fract_15.raw	Mouse_Cell_661W_TMT_1_HpH_Fract_16.raw	Mouse_Cell_661W_TMT_1_HpH_Fract_17.raw	Mouse_Cell_661W_TMT_1_HpH_Fract_2.raw	Mouse_Cell_661W_TMT_1_HpH_Fract_3.raw	Mouse_Cell_661W_TMT_1_HpH_Fract_4.raw	Mouse_Cell_661W_TMT_1_HpH_Fract_5.raw	Mouse_Cell_661W_TMT_1_HpH_Fract_6.raw	Mouse_Cell_661W_TMT_1_HpH_Fract_7.raw	Mouse_Cell_661W_TMT_1_HpH_Fract_8.raw	Mouse_Cell_661W_TMT_1_HpH_Fract_9.raw	Found in Sample: [S1] F1: 126, Control	Found in Sample: [S2] F1: 127N, Sample	Found in Sample: [S3] F1: 127C, Sample	Found in Sample: [S4] F1: 128N, Sample	Found in Sample: [S5] F1: 128C, Sample	Found in Sample: [S6] F1: 129N, Sample	Found in Sample: [S7] F1: 129C, Sample	Found in Sample: [S8] F1: 130N, Sample	Found in Sample: [S9] F1: 130C, Sample	Found in Sample: [S10] F1: 131, Sample	Found in Sample Group: F1, 126	Found in Sample Group: F1, 127N	Found in Sample Group: F1, 127C	Found in Sample Group: F1, 128N	Found in Sample Group: F1, 128C	Found in Sample Group: F1, 129N	Found in Sample Group: F1, 129C	Found in Sample Group: F1, 130N	Found in Sample Group: F1, 130C	Found in Sample Group: F1, 131
		High	DESSPYAAMLAAQDVAQR	1xOxidation [M9]; 1xTMT6plex [N-Term]	5.95726e-07	0	1	3	2	P62264	0	2168.05	Not Found	Not Found	Not Found	Not Found	Not Found	Not Found	Not Found	Not Found	Not Found	Not Found	Not Found	Not Found	Not Found	Not Found	Not Found	Not Found	High	High	High	High	High	High	High	High	High	High	High	High	High	High	High	High	High	High	High	High	High
		High	DESSPYAAMLAAQDVAQR	1xTMT6plex [N-Term]	2.13333e-07	0	1	3	4	P62264	0	2152.05	Not Found	Not Found	Not Found	Not Found	Not Found	Not Found	Not Found	Not Found	Not Found	Not Found	Not Found	Not Found	Not Found	Not Found	Not Found	Not Found	High	High	High	High	High	High	High	High	High	High	High	High	High	High	High	High	High	High	High	High	High
		High	IEDVTPIPSDSTR	1xTMT6plex [N-Term]	8.34118e-06	0	1	1	2	P62264	0	1658.88	Not Found	Not Found	Not Found	Not Found	Not Found	Not Found	Not Found	Not Found	Not Found	Not Found	Not Found	High	Not Found	Not Found	Not Found	Not Found	Not Found	High	High	High	High	High	High	High	High	High	High	High	High	High	High	High	High	High	High	High	High
		High	ADRDESSPYAAMLAAQDVAQR	1xOxidation [M12]; 1xTMT6plex [N-Term]	3.20125e-10	0	1	3	4	P62264	1	2510.21	Not Found	Not Found	Not Found	Not Found	Not Found	Not Found	Not Found	Not Found	Not Found	High	Not Found	Not Found	Not Found	Not Found	Not Found	Not Found	High	High	High	High	High	High	High	High	High	High	High	High	High	High	High	High	High	High	High	High	High
		High	ADRDESSPYAAMLAAQDVAQR	1xTMT6plex [N-Term]	2.63145e-14	0	1	3	6	P62264	1	2494.22	Not Found	Not Found	Not Found	Not Found	Not Found	Not Found	Not Found	Not Found	Not Found	Not Found	Not Found	Not Found	Not Found	Not Found	Not Found	High	High	High	High	High	High	High	High	High	High	High	High	High	High	High	High	High	High	High	High	High	High
		High	TPGPGAQSALR		0.000206999	3.26555e-05	1	3	2	P62264	0	1054.56	Not Found	Not Found	Not Found	Not Found	High	Not Found	Not Found	Not Found	Not Found	Not Found	Not Found	Not Found	Not Found	Not Found	Not Found	Not Found	Not Found	High	High	High	High	High	High	High	High	High	High	High	High	High	High	High	High	High	High	High	High
		High	ELGITALHIK	2xTMT6plex [N-Term; K10]	0.000606233	0.000139833	1	3	3	P62264	0	1552.98	Not Found	Not Found	Not Found	Not Found	Not Found	Not Found	Not Found	Not Found	Not Found	Not Found	Not Found	Not Found	High	Not Found	Not Found	Not Found	Not Found	High	High	High	High	High	High	High	High	High	High	High	High	High	High	High	High	High	High	High	High
High	Master Protein	Q8K371	Angiomotin-like protein 2 OS=Mus musculus OX=10090 GN=Amotl2 PE=1 SV=1	0	11.186	3.62694	2	3	2	1	772	85.226	7.21	Not Found	Not Found	Not Found	Not Found	Not Found	Not Found	Not Found	Not Found	Not Found	Not Found	High	Not Found	Not Found	Not Found	Not Found	Not Found	Not Found	High	High	High	High	High	High	High	High	High	High	High	High	High	High	High	High	High	High	High
Checked	Protein Group ID	# Proteins	# Unique Peptides	# Peptides	# PSMs	Group Description	Mouse_Cell_661W_TMT_1_HpH_Fract_1.raw	Mouse_Cell_661W_TMT_1_HpH_Fract_10.raw	Mouse_Cell_661W_TMT_1_HpH_Fract_11.raw	Mouse_Cell_661W_TMT_1_HpH_Fract_12.raw	Mouse_Cell_661W_TMT_1_HpH_Fract_13.raw	Mouse_Cell_661W_TMT_1_HpH_Fract_14.raw	Mouse_Cell_661W_TMT_1_HpH_Fract_15.raw	Mouse_Cell_661W_TMT_1_HpH_Fract_16.raw	Mouse_Cell_661W_TMT_1_HpH_Fract_17.raw	Mouse_Cell_661W_TMT_1_HpH_Fract_2.raw	Mouse_Cell_661W_TMT_1_HpH_Fract_3.raw	Mouse_Cell_661W_TMT_1_HpH_Fract_4.raw	Mouse_Cell_661W_TMT_1_HpH_Fract_5.raw	Mouse_Cell_661W_TMT_1_HpH_Fract_6.raw	Mouse_Cell_661W_TMT_1_HpH_Fract_7.raw	Mouse_Cell_661W_TMT_1_HpH_Fract_8.raw	Mouse_Cell_661W_TMT_1_HpH_Fract_9.raw	Found in Sample: [S1] F1: 126, Control	Found in Sample: [S2] F1: 127N, Sample	Found in Sample: [S3] F1: 127C, Sample	Found in Sample: [S4] F1: 128N, Sample	Found in Sample: [S5] F1: 128C, Sample	Found in Sample: [S6] F1: 129N, Sample	Found in Sample: [S7] F1: 129C, Sample	Found in Sample: [S8] F1: 130N, Sample	Found in Sample: [S9] F1: 130C, Sample	Found in Sample: [S10] F1: 131, Sample	Found in Sample Group: F1, 126	Found in Sample Group: F1, 127N	Found in Sample Group: F1, 127C	Found in Sample Group: F1, 128N	Found in Sample Group: F1, 128C	Found in Sample Group: F1, 129N	Found in Sample Group: F1, 129C	Found in Sample Group: F1, 130N	Found in Sample Group: F1, 130C	Found in Sample Group: F1, 131
	3634	6	2	2	3	[Master Protein] Angiomotin-like protein 2 OS=Mus musculus OX=10090 GN=Amotl2 PE=1 SV=1	Not Found	Not Found	Not Found	Not Found	Not Found	Not Found	Not Found	Not Found	Not Found	Not Found	High	Not Found	Not Found	Not Found	Not Found	Not Found	Not Found	High	High	High	High	High	High	High	High	High	High	High	High	High	High	High	High	High	High	High	High
	Checked	Confidence	Sequence	Modifications	Qvality PEP	Qvality q-value	# Protein Groups	# Proteins	# PSMs	Master Protein Accessions	# Missed Cleavages	Theo. MH+ [Da]	Mouse_Cell_661W_TMT_1_HpH_Fract_1.raw	Mouse_Cell_661W_TMT_1_HpH_Fract_10.raw	Mouse_Cell_661W_TMT_1_HpH_Fract_11.raw	Mouse_Cell_661W_TMT_1_HpH_Fract_12.raw	Mouse_Cell_661W_TMT_1_HpH_Fract_13.raw	Mouse_Cell_661W_TMT_1_HpH_Fract_14.raw	Mouse_Cell_661W_TMT_1_HpH_Fract_15.raw	Mouse_Cell_661W_TMT_1_HpH_Fract_16.raw	Mouse_Cell_661W_TMT_1_HpH_Fract_17.raw	Mouse_Cell_661W_TMT_1_HpH_Fract_2.raw	Mouse_Cell_661W_TMT_1_HpH_Fract_3.raw	Mouse_Cell_661W_TMT_1_HpH_Fract_4.raw	Mouse_Cell_661W_TMT_1_HpH_Fract_5.raw	Mouse_Cell_661W_TMT_1_HpH_Fract_6.raw	Mouse_Cell_661W_TMT_1_HpH_Fract_7.raw	Mouse_Cell_661W_TMT_1_HpH_Fract_8.raw	Mouse_Cell_661W_TMT_1_HpH_Fract_9.raw	Found in Sample: [S1] F1: 126, Control	Found in Sample: [S2] F1: 127N, Sample	Found in Sample: [S3] F1: 127C, Sample	Found in Sample: [S4] F1: 128N, Sample	Found in Sample: [S5] F1: 128C, Sample	Found in Sample: [S6] F1: 129N, Sample	Found in Sample: [S7] F1: 129C, Sample	Found in Sample: [S8] F1: 130N, Sample	Found in Sample: [S9] F1: 130C, Sample	Found in Sample: [S10] F1: 131, Sample	Found in Sample Group: F1, 126	Found in Sample Group: F1, 127N	Found in Sample Group: F1, 127C	Found in Sample Group: F1, 128N	Found in Sample Group: F1, 128C	Found in Sample Group: F1, 129N	Found in Sample Group: F1, 129C	Found in Sample Group: F1, 130N	Found in Sample Group: F1, 130C	Found in Sample Group: F1, 131
		High	QEPQGQEHQGGETHLAENR	1xTMT6plex [N-Term]	7.5663e-09	0	1	5	2	Q8K371	0	2374.13	Not Found	Not Found	Not Found	Not Found	Not Found	Not Found	Not Found	Not Found	Not Found	Not Found	High	Not Found	Not Found	Not Found	Not Found	Not Found	Not Found	High	High	High	High	High	High	High	High	High	High	High	High	High	High	High	High	High	High	High	High
		High	VLHAQILEK	2xTMT6plex [N-Term; K9]	0.00822635	0.000873551	1	4	1	Q8K371	0	1508.96	Not Found	Not Found	Not Found	Not Found	Not Found	Not Found	Not Found	Not Found	Not Found	Not Found	High	Not Found	Not Found	Not Found	Not Found	Not Found	Not Found	High	High	High	High	High	High	High	High	High	High	High	High	High	High	High	High	High	High	High	High
High	Master Protein	Q8BTW9	Serine/threonine-protein kinase PAK 4 OS=Mus musculus OX=10090 GN=Pak4 PE=1 SV=1	0.00152012	5.30439	5.56492	3	4	3	1	593	64.583	9.85	Not Found	Not Found	Not Found	Not Found	Not Found	High	Not Found	Not Found	Not Found	Not Found	Not Found	Not Found	Not Found	Not Found	Not Found	Not Found	High	High	High	High	High	High	High	High	High	High	High	High	High	High	High	High	High	High	High	High
Checked	Protein Group ID	# Proteins	# Unique Peptides	# Peptides	# PSMs	Group Description	Mouse_Cell_661W_TMT_1_HpH_Fract_1.raw	Mouse_Cell_661W_TMT_1_HpH_Fract_10.raw	Mouse_Cell_661W_TMT_1_HpH_Fract_11.raw	Mouse_Cell_661W_TMT_1_HpH_Fract_12.raw	Mouse_Cell_661W_TMT_1_HpH_Fract_13.raw	Mouse_Cell_661W_TMT_1_HpH_Fract_14.raw	Mouse_Cell_661W_TMT_1_HpH_Fract_15.raw	Mouse_Cell_661W_TMT_1_HpH_Fract_16.raw	Mouse_Cell_661W_TMT_1_HpH_Fract_17.raw	Mouse_Cell_661W_TMT_1_HpH_Fract_2.raw	Mouse_Cell_661W_TMT_1_HpH_Fract_3.raw	Mouse_Cell_661W_TMT_1_HpH_Fract_4.raw	Mouse_Cell_661W_TMT_1_HpH_Fract_5.raw	Mouse_Cell_661W_TMT_1_HpH_Fract_6.raw	Mouse_Cell_661W_TMT_1_HpH_Fract_7.raw	Mouse_Cell_661W_TMT_1_HpH_Fract_8.raw	Mouse_Cell_661W_TMT_1_HpH_Fract_9.raw	Found in Sample: [S1] F1: 126, Control	Found in Sample: [S2] F1: 127N, Sample	Found in Sample: [S3] F1: 127C, Sample	Found in Sample: [S4] F1: 128N, Sample	Found in Sample: [S5] F1: 128C, Sample	Found in Sample: [S6] F1: 129N, Sample	Found in Sample: [S7] F1: 129C, Sample	Found in Sample: [S8] F1: 130N, Sample	Found in Sample: [S9] F1: 130C, Sample	Found in Sample: [S10] F1: 131, Sample	Found in Sample Group: F1, 126	Found in Sample Group: F1, 127N	Found in Sample Group: F1, 127C	Found in Sample Group: F1, 128N	Found in Sample Group: F1, 128C	Found in Sample Group: F1, 129N	Found in Sample Group: F1, 129C	Found in Sample Group: F1, 130N	Found in Sample Group: F1, 130C	Found in Sample Group: F1, 131
	3652	2	3	3	4	[Master Protein] Serine/threonine-protein kinase PAK 4 OS=Mus musculus OX=10090 GN=Pak4 PE=1 SV=1	Not Found	Not Found	Not Found	Not Found	Not Found	High	Not Found	Not Found	Not Found	Not Found	Not Found	Not Found	Not Found	Not Found	Not Found	Not Found	High	High	High	High	High	High	High	High	High	High	High	High	High	High	High	High	High	High	High	High	High
	Checked	Confidence	Sequence	Modifications	Qvality PEP	Qvality q-value	# Protein Groups	# Proteins	# PSMs	Master Protein Accessions	# Missed Cleavages	Theo. MH+ [Da]	Mouse_Cell_661W_TMT_1_HpH_Fract_1.raw	Mouse_Cell_661W_TMT_1_HpH_Fract_10.raw	Mouse_Cell_661W_TMT_1_HpH_Fract_11.raw	Mouse_Cell_661W_TMT_1_HpH_Fract_12.raw	Mouse_Cell_661W_TMT_1_HpH_Fract_13.raw	Mouse_Cell_661W_TMT_1_HpH_Fract_14.raw	Mouse_Cell_661W_TMT_1_HpH_Fract_15.raw	Mouse_Cell_661W_TMT_1_HpH_Fract_16.raw	Mouse_Cell_661W_TMT_1_HpH_Fract_17.raw	Mouse_Cell_661W_TMT_1_HpH_Fract_2.raw	Mouse_Cell_661W_TMT_1_HpH_Fract_3.raw	Mouse_Cell_661W_TMT_1_HpH_Fract_4.raw	Mouse_Cell_661W_TMT_1_HpH_Fract_5.raw	Mouse_Cell_661W_TMT_1_HpH_Fract_6.raw	Mouse_Cell_661W_TMT_1_HpH_Fract_7.raw	Mouse_Cell_661W_TMT_1_HpH_Fract_8.raw	Mouse_Cell_661W_TMT_1_HpH_Fract_9.raw	Found in Sample: [S1] F1: 126, Control	Found in Sample: [S2] F1: 127N, Sample	Found in Sample: [S3] F1: 127C, Sample	Found in Sample: [S4] F1: 128N, Sample	Found in Sample: [S5] F1: 128C, Sample	Found in Sample: [S6] F1: 129N, Sample	Found in Sample: [S7] F1: 129C, Sample	Found in Sample: [S8] F1: 130N, Sample	Found in Sample: [S9] F1: 130C, Sample	Found in Sample: [S10] F1: 131, Sample	Found in Sample Group: F1, 126	Found in Sample Group: F1, 127N	Found in Sample Group: F1, 127C	Found in Sample Group: F1, 128N	Found in Sample Group: F1, 128C	Found in Sample Group: F1, 129N	Found in Sample Group: F1, 129C	Found in Sample Group: F1, 130N	Found in Sample Group: F1, 130C	Found in Sample Group: F1, 131
		High	ATAAELLK	2xTMT6plex [N-Term; K8]	0.00721176	0.000720308	1	1	1	Q8BTW9	0	1274.81	Not Found	Not Found	Not Found	Not Found	Not Found	Not Found	Not Found	Not Found	Not Found	Not Found	Not Found	Not Found	Not Found	Not Found	Not Found	Not Found	High	High	High	High	High	High	High	High	High	High	High	High	High	High	High	High	High	High	High	High	High
		High	DGALTLLLDEFENMSVTR	1xOxidation [M14]; 1xTMT6plex [N-Term]	0.0434687	0.0038998	1	1	1	Q8BTW9	0	2269.16	Not Found	Not Found	Not Found	Not Found	Not Found	High	Not Found	Not Found	Not Found	Not Found	Not Found	Not Found	Not Found	Not Found	Not Found	Not Found	Not Found	High	High	High	High	High	High	High	High	High	High	High	High	High	High	High	High	High	High	High	High
		High	VSHEQFR	1xTMT6plex [N-Term]	0.110207	0.00935601	1	2	2	Q8BTW9	0	1131.61	Not Found	Not Found	Not Found	Not Found	Not Found	High	Not Found	Not Found	Not Found	Not Found	Not Found	Not Found	Not Found	Not Found	Not Found	Not Found	Not Found	High	High	High	High	High	High	High	High	High	High	High	High	High	High	High	High	High	High	High	High
High	Master Protein	Q9D9V3	Ethylmalonyl-CoA decarboxylase OS=Mus musculus OX=10090 GN=Echdc1 PE=1 SV=2	0	48.5116	34.7826	7	21	7	1	322	35.444	7.01	High	High	Not Found	Not Found	High	High	Not Found	Not Found	Not Found	High	High	Not Found	Not Found	Not Found	High	Not Found	Not Found	High	High	High	High	High	High	High	High	High	High	High	High	High	High	High	High	High	High	High
Checked	Protein Group ID	# Proteins	# Unique Peptides	# Peptides	# PSMs	Group Description	Mouse_Cell_661W_TMT_1_HpH_Fract_1.raw	Mouse_Cell_661W_TMT_1_HpH_Fract_10.raw	Mouse_Cell_661W_TMT_1_HpH_Fract_11.raw	Mouse_Cell_661W_TMT_1_HpH_Fract_12.raw	Mouse_Cell_661W_TMT_1_HpH_Fract_13.raw	Mouse_Cell_661W_TMT_1_HpH_Fract_14.raw	Mouse_Cell_661W_TMT_1_HpH_Fract_15.raw	Mouse_Cell_661W_TMT_1_HpH_Fract_16.raw	Mouse_Cell_661W_TMT_1_HpH_Fract_17.raw	Mouse_Cell_661W_TMT_1_HpH_Fract_2.raw	Mouse_Cell_661W_TMT_1_HpH_Fract_3.raw	Mouse_Cell_661W_TMT_1_HpH_Fract_4.raw	Mouse_Cell_661W_TMT_1_HpH_Fract_5.raw	Mouse_Cell_661W_TMT_1_HpH_Fract_6.raw	Mouse_Cell_661W_TMT_1_HpH_Fract_7.raw	Mouse_Cell_661W_TMT_1_HpH_Fract_8.raw	Mouse_Cell_661W_TMT_1_HpH_Fract_9.raw	Found in Sample: [S1] F1: 126, Control	Found in Sample: [S2] F1: 127N, Sample	Found in Sample: [S3] F1: 127C, Sample	Found in Sample: [S4] F1: 128N, Sample	Found in Sample: [S5] F1: 128C, Sample	Found in Sample: [S6] F1: 129N, Sample	Found in Sample: [S7] F1: 129C, Sample	Found in Sample: [S8] F1: 130N, Sample	Found in Sample: [S9] F1: 130C, Sample	Found in Sample: [S10] F1: 131, Sample	Found in Sample Group: F1, 126	Found in Sample Group: F1, 127N	Found in Sample Group: F1, 127C	Found in Sample Group: F1, 128N	Found in Sample Group: F1, 128C	Found in Sample Group: F1, 129N	Found in Sample Group: F1, 129C	Found in Sample Group: F1, 130N	Found in Sample Group: F1, 130C	Found in Sample Group: F1, 131
	3654	3	7	7	21	[Master Protein] Ethylmalonyl-CoA decarboxylase OS=Mus musculus OX=10090 GN=Echdc1 PE=1 SV=2	High	High	Not Found	Not Found	High	High	Not Found	Not Found	Not Found	High	High	Not Found	Not Found	Not Found	High	Not Found	Not Found	High	High	High	High	High	High	High	High	High	High	High	High	High	High	High	High	High	High	High	High
	Checked	Confidence	Sequence	Modifications	Qvality PEP	Qvality q-value	# Protein Groups	# Proteins	# PSMs	Master Protein Accessions	# Missed Cleavages	Theo. MH+ [Da]	Mouse_Cell_661W_TMT_1_HpH_Fract_1.raw	Mouse_Cell_661W_TMT_1_HpH_Fract_10.raw	Mouse_Cell_661W_TMT_1_HpH_Fract_11.raw	Mouse_Cell_661W_TMT_1_HpH_Fract_12.raw	Mouse_Cell_661W_TMT_1_HpH_Fract_13.raw	Mouse_Cell_661W_TMT_1_HpH_Fract_14.raw	Mouse_Cell_661W_TMT_1_HpH_Fract_15.raw	Mouse_Cell_661W_TMT_1_HpH_Fract_16.raw	Mouse_Cell_661W_TMT_1_HpH_Fract_17.raw	Mouse_Cell_661W_TMT_1_HpH_Fract_2.raw	Mouse_Cell_661W_TMT_1_HpH_Fract_3.raw	Mouse_Cell_661W_TMT_1_HpH_Fract_4.raw	Mouse_Cell_661W_TMT_1_HpH_Fract_5.raw	Mouse_Cell_661W_TMT_1_HpH_Fract_6.raw	Mouse_Cell_661W_TMT_1_HpH_Fract_7.raw	Mouse_Cell_661W_TMT_1_HpH_Fract_8.raw	Mouse_Cell_661W_TMT_1_HpH_Fract_9.raw	Found in Sample: [S1] F1: 126, Control	Found in Sample: [S2] F1: 127N, Sample	Found in Sample: [S3] F1: 127C, Sample	Found in Sample: [S4] F1: 128N, Sample	Found in Sample: [S5] F1: 128C, Sample	Found in Sample: [S6] F1: 129N, Sample	Found in Sample: [S7] F1: 129C, Sample	Found in Sample: [S8] F1: 130N, Sample	Found in Sample: [S9] F1: 130C, Sample	Found in Sample: [S10] F1: 131, Sample	Found in Sample Group: F1, 126	Found in Sample Group: F1, 127N	Found in Sample Group: F1, 127C	Found in Sample Group: F1, 128N	Found in Sample Group: F1, 128C	Found in Sample Group: F1, 129N	Found in Sample Group: F1, 129C	Found in Sample Group: F1, 130N	Found in Sample Group: F1, 130C	Found in Sample Group: F1, 131
		High	DVLETLWGGPANLEAIAK	1xDeamidated [N12]; 2xTMT6plex [N-Term; K18]	1.44818e-06	0	1	2	3	Q9D9V3	0	2356.32	Not Found	Not Found	Not Found	Not Found	High	High	Not Found	Not Found	Not Found	Not Found	Not Found	Not Found	Not Found	Not Found	Not Found	Not Found	Not Found	High	High	High	High	High	High	High	High	High	High	High	High	High	High	High	High	High	High	High	High
		High	DVLETLWGGPANLEAIAK	2xTMT6plex [N-Term; K18]	1.65302e-06	0	1	2	4	Q9D9V3	0	2355.33	Not Found	Not Found	Not Found	Not Found	High	High	Not Found	Not Found	Not Found	Not Found	Not Found	Not Found	Not Found	Not Found	Not Found	Not Found	Not Found	High	High	High	High	High	High	High	High	High	High	High	High	High	High	High	High	High	High	High	High
		High	ILEQFPGGSIDLLK	2xTMT6plex [N-Term; K14]	0.000307061	3.26555e-05	1	3	2	Q9D9V3	0	1988.18	Not Found	Not Found	Not Found	Not Found	Not Found	Not Found	Not Found	Not Found	Not Found	High	High	Not Found	Not Found	Not Found	Not Found	Not Found	Not Found	High	High	High	High	High	High	High	High	High	High	High	High	High	High	High	High	High	High	High	High
		High	VIELENWTEGK	2xTMT6plex [N-Term; K11]	0.000320282	3.26555e-05	1	3	1	Q9D9V3	0	1775.99	High	Not Found	Not Found	Not Found	Not Found	Not Found	Not Found	Not Found	Not Found	Not Found	Not Found	Not Found	Not Found	Not Found	Not Found	Not Found	Not Found	High	High	High	High	High	High	High	High	High	High	High	High	High	High	High	High	High	High	High	High
		High	QNGIGILTLNNPNK	1xGln->pyro-Glu [N-Term]; 1xTMT6plex [K14]	0.000249992	3.26555e-05	1	3	1	Q9D9V3	0	1707.96	High	Not Found	Not Found	Not Found	Not Found	Not Found	Not Found	Not Found	Not Found	Not Found	Not Found	Not Found	Not Found	Not Found	Not Found	Not Found	Not Found	High	High	High	High	High	High	High	High	High	High	High	High	High	High	High	High	High	High	High	High
		High	EALNIGLTDEVLQPSDETTALEQAQEWLEK	2xDeamidated [Q23; Q]; 2xTMT6plex [N-Term; K30]	0.00166916	0.000282382	1	2	2	Q9D9V3	0	3830.95	Not Found	Not Found	Not Found	Not Found	Not Found	Not Found	Not Found	Not Found	Not Found	Not Found	Not Found	Not Found	Not Found	Not Found	High	Not Found	Not Found	High	High	High	High	High	High	High	High	High	High	High	High	High	High	High	High	High	High	High	High
		High	ELYIEEALQNER	1xTMT6plex [N-Term]	0.00238301	0.000392305	1	2	2	Q9D9V3	0	1735.91	Not Found	Not Found	Not Found	Not Found	Not Found	High	Not Found	Not Found	Not Found	Not Found	Not Found	Not Found	Not Found	Not Found	Not Found	Not Found	Not Found	High	High	High	High	High	High	High	High	High	High	High	High	High	High	High	High	High	High	High	High
		High	EMGIVPSWGGTSR	1xOxidation [M2]; 1xTMT6plex [N-Term]	0.0026748	0.00040345	1	2	2	Q9D9V3	0	1621.82	High	Not Found	Not Found	Not Found	Not Found	Not Found	Not Found	Not Found	Not Found	Not Found	Not Found	Not Found	Not Found	Not Found	Not Found	Not Found	Not Found	High	High	High	High	High	High	High	High	High	High	High	High	High	High	High	High	High	High	High	High
		High	VIELENWTEGK	1xTMT6plex [N-Term]	0.00500807	0.000519722	1	3	2	Q9D9V3	0	1546.83	Not Found	High	Not Found	Not Found	Not Found	Not Found	Not Found	Not Found	Not Found	Not Found	Not Found	Not Found	Not Found	Not Found	Not Found	Not Found	Not Found	High	High	High	High	High	High	High	High	High	High	High	High	High	High	High	High	High	High	High	High
		High	QNGIGILTLNNPNK	1xDeamidated [N2]; 2xTMT6plex [N-Term; K14]	0.0187136	0.00178521	1	3	1	Q9D9V3	0	1955.13	Not Found	Not Found	Not Found	Not Found	Not Found	Not Found	Not Found	Not Found	Not Found	High	Not Found	Not Found	Not Found	Not Found	Not Found	Not Found	Not Found	High	High	High	High	High	High	High	High	High	High	High	High	High	High	High	High	High	High	High	High
		High	ILEQFPGGSIDLLK	1xDeamidated [Q4]; 2xTMT6plex [N-Term; K14]	0.0591662	0.00528058	1	3	1	Q9D9V3	0	1989.17	Not Found	Not Found	Not Found	Not Found	Not Found	Not Found	Not Found	Not Found	Not Found	High	Not Found	Not Found	Not Found	Not Found	Not Found	Not Found	Not Found	High	High	High	High	High	High	High	High	High	High	High	High	High	High	High	High	High	High	High	High
High	Master Protein	Q8VDW0	ATP-dependent RNA helicase DDX39A OS=Mus musculus OX=10090 GN=Ddx39a PE=1 SV=1	0	41.0064	20.8431	7	18	3	1	427	49.036	5.68	High	High	High	Not Found	High	Not Found	Not Found	Not Found	Not Found	High	Not Found	High	Not Found	Not Found	Not Found	High	Not Found	High	High	High	High	High	High	High	High	High	High	High	High	High	High	High	High	High	High	High
Checked	Protein Group ID	# Proteins	# Unique Peptides	# Peptides	# PSMs	Group Description	Mouse_Cell_661W_TMT_1_HpH_Fract_1.raw	Mouse_Cell_661W_TMT_1_HpH_Fract_10.raw	Mouse_Cell_661W_TMT_1_HpH_Fract_11.raw	Mouse_Cell_661W_TMT_1_HpH_Fract_12.raw	Mouse_Cell_661W_TMT_1_HpH_Fract_13.raw	Mouse_Cell_661W_TMT_1_HpH_Fract_14.raw	Mouse_Cell_661W_TMT_1_HpH_Fract_15.raw	Mouse_Cell_661W_TMT_1_HpH_Fract_16.raw	Mouse_Cell_661W_TMT_1_HpH_Fract_17.raw	Mouse_Cell_661W_TMT_1_HpH_Fract_2.raw	Mouse_Cell_661W_TMT_1_HpH_Fract_3.raw	Mouse_Cell_661W_TMT_1_HpH_Fract_4.raw	Mouse_Cell_661W_TMT_1_HpH_Fract_5.raw	Mouse_Cell_661W_TMT_1_HpH_Fract_6.raw	Mouse_Cell_661W_TMT_1_HpH_Fract_7.raw	Mouse_Cell_661W_TMT_1_HpH_Fract_8.raw	Mouse_Cell_661W_TMT_1_HpH_Fract_9.raw	Found in Sample: [S1] F1: 126, Control	Found in Sample: [S2] F1: 127N, Sample	Found in Sample: [S3] F1: 127C, Sample	Found in Sample: [S4] F1: 128N, Sample	Found in Sample: [S5] F1: 128C, Sample	Found in Sample: [S6] F1: 129N, Sample	Found in Sample: [S7] F1: 129C, Sample	Found in Sample: [S8] F1: 130N, Sample	Found in Sample: [S9] F1: 130C, Sample	Found in Sample: [S10] F1: 131, Sample	Found in Sample Group: F1, 126	Found in Sample Group: F1, 127N	Found in Sample Group: F1, 127C	Found in Sample Group: F1, 128N	Found in Sample Group: F1, 128C	Found in Sample Group: F1, 129N	Found in Sample Group: F1, 129C	Found in Sample Group: F1, 130N	Found in Sample Group: F1, 130C	Found in Sample Group: F1, 131
	3671	4	3	7	18	[Master Protein] ATP-dependent RNA helicase DDX39A OS=Mus musculus OX=10090 GN=Ddx39a PE=1 SV=1	High	High	High	Not Found	High	Not Found	Not Found	Not Found	Not Found	High	Not Found	High	Not Found	Not Found	Not Found	High	Not Found	High	High	High	High	High	High	High	High	High	High	High	High	High	High	High	High	High	High	High	High
	Checked	Confidence	Sequence	Modifications	Qvality PEP	Qvality q-value	# Protein Groups	# Proteins	# PSMs	Master Protein Accessions	# Missed Cleavages	Theo. MH+ [Da]	Mouse_Cell_661W_TMT_1_HpH_Fract_1.raw	Mouse_Cell_661W_TMT_1_HpH_Fract_10.raw	Mouse_Cell_661W_TMT_1_HpH_Fract_11.raw	Mouse_Cell_661W_TMT_1_HpH_Fract_12.raw	Mouse_Cell_661W_TMT_1_HpH_Fract_13.raw	Mouse_Cell_661W_TMT_1_HpH_Fract_14.raw	Mouse_Cell_661W_TMT_1_HpH_Fract_15.raw	Mouse_Cell_661W_TMT_1_HpH_Fract_16.raw	Mouse_Cell_661W_TMT_1_HpH_Fract_17.raw	Mouse_Cell_661W_TMT_1_HpH_Fract_2.raw	Mouse_Cell_661W_TMT_1_HpH_Fract_3.raw	Mouse_Cell_661W_TMT_1_HpH_Fract_4.raw	Mouse_Cell_661W_TMT_1_HpH_Fract_5.raw	Mouse_Cell_661W_TMT_1_HpH_Fract_6.raw	Mouse_Cell_661W_TMT_1_HpH_Fract_7.raw	Mouse_Cell_661W_TMT_1_HpH_Fract_8.raw	Mouse_Cell_661W_TMT_1_HpH_Fract_9.raw	Found in Sample: [S1] F1: 126, Control	Found in Sample: [S2] F1: 127N, Sample	Found in Sample: [S3] F1: 127C, Sample	Found in Sample: [S4] F1: 128N, Sample	Found in Sample: [S5] F1: 128C, Sample	Found in Sample: [S6] F1: 129N, Sample	Found in Sample: [S7] F1: 129C, Sample	Found in Sample: [S8] F1: 130N, Sample	Found in Sample: [S9] F1: 130C, Sample	Found in Sample: [S10] F1: 131, Sample	Found in Sample Group: F1, 126	Found in Sample Group: F1, 127N	Found in Sample Group: F1, 127C	Found in Sample Group: F1, 128N	Found in Sample Group: F1, 128C	Found in Sample Group: F1, 129N	Found in Sample Group: F1, 129C	Found in Sample Group: F1, 130N	Found in Sample Group: F1, 130C	Found in Sample Group: F1, 131
		High	LTLHGLQQYYVK	2xTMT6plex [N-Term; K12]	2.21169e-05	0	2	3	1	Q9Z1N5; Q8VDW0	0	1921.13	Not Found	Not Found	Not Found	Not Found	High	Not Found	Not Found	Not Found	Not Found	Not Found	Not Found	Not Found	Not Found	Not Found	Not Found	Not Found	Not Found	High	High	High	High	High	High	High	High	High	High	High	High	High	High	High	High	High	High	High	High
		High	GLAVTFVSDENDAK	2xTMT6plex [N-Term; K14]	4.73274e-08	0	1	2	2	Q8VDW0	0	1924.04	Not Found	Not Found	High	Not Found	Not Found	Not Found	Not Found	Not Found	Not Found	Not Found	Not Found	Not Found	Not Found	Not Found	Not Found	Not Found	Not Found	High	High	High	High	High	High	High	High	High	High	High	High	High	High	High	High	High	High	High	High
		High	FEVNVAELPEEIDISTYIEQSR	1xTMT6plex [N-Term]	1.32593e-06	0	1	2	2	Q8VDW0	0	2810.43	Not Found	Not Found	High	Not Found	Not Found	Not Found	Not Found	Not Found	Not Found	Not Found	Not Found	Not Found	Not Found	Not Found	Not Found	Not Found	Not Found	High	High	High	High	High	High	High	High	High	High	High	High	High	High	High	High	High	High	High	High
		High	FMQDPMEVFVDDETK	1xOxidation [M]; 2xTMT6plex [N-Term; K15]	1.74168e-05	0	1	1	3	Q8VDW0	0	2305.11	Not Found	Not Found	Not Found	Not Found	Not Found	Not Found	Not Found	Not Found	Not Found	Not Found	Not Found	High	Not Found	Not Found	Not Found	Not Found	Not Found	High	High	High	High	High	High	High	High	High	High	High	High	High	High	High	High	High	High	High	High
		High	GLAVTFVSDENDAK	1xDeamidated [N11]; 1xTMT6plex [N-Term]	0.00124655	0.000215237	1	2	2	Q8VDW0	0	1695.86	Not Found	Not Found	Not Found	Not Found	Not Found	Not Found	Not Found	Not Found	Not Found	Not Found	Not Found	Not Found	Not Found	Not Found	Not Found	High	Not Found	High	High	High	High	High	High	High	High	High	High	High	High	High	High	High	High	High	High	High	High
		High	ELAFQISK	2xTMT6plex [N-Term; K8]	0.00138988	0.000240044	2	4	1	Q9Z1N5; Q8VDW0	0	1393.85	Not Found	Not Found	Not Found	Not Found	Not Found	Not Found	Not Found	Not Found	Not Found	High	Not Found	Not Found	Not Found	Not Found	Not Found	Not Found	Not Found	High	High	High	High	High	High	High	High	High	High	High	High	High	High	High	High	High	High	High	High
		High	MLEQLDMR	1xTMT6plex [N-Term]	0.00560703	0.000560225	2	3	2	Q9Z1N5; Q8VDW0	0	1264.66	High	Not Found	Not Found	Not Found	Not Found	Not Found	Not Found	Not Found	Not Found	Not Found	Not Found	Not Found	Not Found	Not Found	Not Found	Not Found	Not Found	High	High	High	High	High	High	High	High	High	High	High	High	High	High	High	High	High	High	High	High
		High	DFLLKPELLR	1xTMT6plex [N-Term]	0.00872572	0.000873551	2	3	2	Q9Z1N5; Q8VDW0	0	1472.9	Not Found	Not Found	Not Found	Not Found	Not Found	Not Found	Not Found	Not Found	Not Found	Not Found	Not Found	Not Found	Not Found	Not Found	Not Found	High	Not Found	High	Not Found	Not Found	Not Found	Not Found	High	High	High	Not Found	Not Found	High	Not Found	Not Found	Not Found	Not Found	High	High	High	Not Found	Not Found
		High	DFLLKPELLR	2xTMT6plex [N-Term; K5]	0.0215094	0.00207448	2	3	3	Q9Z1N5; Q8VDW0	0	1702.07	Not Found	High	High	Not Found	Not Found	Not Found	Not Found	Not Found	Not Found	Not Found	Not Found	Not Found	Not Found	Not Found	Not Found	Not Found	Not Found	High	High	High	High	High	High	High	High	High	High	High	High	High	High	High	High	High	High	High	High
High	Master Protein	Q8R1R3	StAR-related lipid transfer protein 7, mitochondrial OS=Mus musculus OX=10090 GN=Stard7 PE=1 SV=2	0.00316456	4.09372	6.16622	1	2	1	1	373	43.117	8.95	Not Found	Not Found	Not Found	Not Found	Not Found	Not Found	Not Found	Not Found	Not Found	Not Found	Not Found	High	Not Found	Not Found	Not Found	Not Found	Not Found	High	High	High	High	High	High	High	High	High	High	High	High	High	High	High	High	High	High	High
Checked	Protein Group ID	# Proteins	# Unique Peptides	# Peptides	# PSMs	Group Description	Mouse_Cell_661W_TMT_1_HpH_Fract_1.raw	Mouse_Cell_661W_TMT_1_HpH_Fract_10.raw	Mouse_Cell_661W_TMT_1_HpH_Fract_11.raw	Mouse_Cell_661W_TMT_1_HpH_Fract_12.raw	Mouse_Cell_661W_TMT_1_HpH_Fract_13.raw	Mouse_Cell_661W_TMT_1_HpH_Fract_14.raw	Mouse_Cell_661W_TMT_1_HpH_Fract_15.raw	Mouse_Cell_661W_TMT_1_HpH_Fract_16.raw	Mouse_Cell_661W_TMT_1_HpH_Fract_17.raw	Mouse_Cell_661W_TMT_1_HpH_Fract_2.raw	Mouse_Cell_661W_TMT_1_HpH_Fract_3.raw	Mouse_Cell_661W_TMT_1_HpH_Fract_4.raw	Mouse_Cell_661W_TMT_1_HpH_Fract_5.raw	Mouse_Cell_661W_TMT_1_HpH_Fract_6.raw	Mouse_Cell_661W_TMT_1_HpH_Fract_7.raw	Mouse_Cell_661W_TMT_1_HpH_Fract_8.raw	Mouse_Cell_661W_TMT_1_HpH_Fract_9.raw	Found in Sample: [S1] F1: 126, Control	Found in Sample: [S2] F1: 127N, Sample	Found in Sample: [S3] F1: 127C, Sample	Found in Sample: [S4] F1: 128N, Sample	Found in Sample: [S5] F1: 128C, Sample	Found in Sample: [S6] F1: 129N, Sample	Found in Sample: [S7] F1: 129C, Sample	Found in Sample: [S8] F1: 130N, Sample	Found in Sample: [S9] F1: 130C, Sample	Found in Sample: [S10] F1: 131, Sample	Found in Sample Group: F1, 126	Found in Sample Group: F1, 127N	Found in Sample Group: F1, 127C	Found in Sample Group: F1, 128N	Found in Sample Group: F1, 128C	Found in Sample Group: F1, 129N	Found in Sample Group: F1, 129C	Found in Sample Group: F1, 130N	Found in Sample Group: F1, 130C	Found in Sample Group: F1, 131
	3670	2	1	1	2	[Master Protein] StAR-related lipid transfer protein 7, mitochondrial OS=Mus musculus OX=10090 GN=Stard7 PE=1 SV=2	Not Found	Not Found	Not Found	Not Found	Not Found	Not Found	Not Found	Not Found	Not Found	Not Found	Not Found	High	Not Found	Not Found	Not Found	Not Found	Not Found	High	High	High	High	High	High	High	High	High	High	High	High	High	High	High	High	High	High	High	High
	Checked	Confidence	Sequence	Modifications	Qvality PEP	Qvality q-value	# Protein Groups	# Proteins	# PSMs	Master Protein Accessions	# Missed Cleavages	Theo. MH+ [Da]	Mouse_Cell_661W_TMT_1_HpH_Fract_1.raw	Mouse_Cell_661W_TMT_1_HpH_Fract_10.raw	Mouse_Cell_661W_TMT_1_HpH_Fract_11.raw	Mouse_Cell_661W_TMT_1_HpH_Fract_12.raw	Mouse_Cell_661W_TMT_1_HpH_Fract_13.raw	Mouse_Cell_661W_TMT_1_HpH_Fract_14.raw	Mouse_Cell_661W_TMT_1_HpH_Fract_15.raw	Mouse_Cell_661W_TMT_1_HpH_Fract_16.raw	Mouse_Cell_661W_TMT_1_HpH_Fract_17.raw	Mouse_Cell_661W_TMT_1_HpH_Fract_2.raw	Mouse_Cell_661W_TMT_1_HpH_Fract_3.raw	Mouse_Cell_661W_TMT_1_HpH_Fract_4.raw	Mouse_Cell_661W_TMT_1_HpH_Fract_5.raw	Mouse_Cell_661W_TMT_1_HpH_Fract_6.raw	Mouse_Cell_661W_TMT_1_HpH_Fract_7.raw	Mouse_Cell_661W_TMT_1_HpH_Fract_8.raw	Mouse_Cell_661W_TMT_1_HpH_Fract_9.raw	Found in Sample: [S1] F1: 126, Control	Found in Sample: [S2] F1: 127N, Sample	Found in Sample: [S3] F1: 127C, Sample	Found in Sample: [S4] F1: 128N, Sample	Found in Sample: [S5] F1: 128C, Sample	Found in Sample: [S6] F1: 129N, Sample	Found in Sample: [S7] F1: 129C, Sample	Found in Sample: [S8] F1: 130N, Sample	Found in Sample: [S9] F1: 130C, Sample	Found in Sample: [S10] F1: 131, Sample	Found in Sample Group: F1, 126	Found in Sample Group: F1, 127N	Found in Sample Group: F1, 127C	Found in Sample Group: F1, 128N	Found in Sample Group: F1, 128C	Found in Sample Group: F1, 129N	Found in Sample Group: F1, 129C	Found in Sample Group: F1, 130N	Found in Sample Group: F1, 130C	Found in Sample Group: F1, 131
		High	SFDENGFDYLLTYSDNPQTVFPR	1xTMT6plex [N-Term]	0.000282183	3.26555e-05	1	2	2	Q8R1R3	0	2954.4	Not Found	Not Found	Not Found	Not Found	Not Found	Not Found	Not Found	Not Found	Not Found	Not Found	Not Found	High	Not Found	Not Found	Not Found	Not Found	Not Found	High	High	High	High	High	High	High	High	High	High	High	High	High	High	High	High	High	High	High	High
High	Master Protein	Q9JLI8	Squamous cell carcinoma antigen recognized by T-cells 3 OS=Mus musculus OX=10090 GN=Sart3 PE=1 SV=1	0	81.4171	18.815	13	40	13	1	962	109.55	5.24	High	High	High	Not Found	Not Found	High	Not Found	Not Found	Not Found	High	High	High	High	High	High	Not Found	High	High	High	High	High	High	High	High	High	High	High	High	High	High	High	High	High	High	High	High
Checked	Protein Group ID	# Proteins	# Unique Peptides	# Peptides	# PSMs	Group Description	Mouse_Cell_661W_TMT_1_HpH_Fract_1.raw	Mouse_Cell_661W_TMT_1_HpH_Fract_10.raw	Mouse_Cell_661W_TMT_1_HpH_Fract_11.raw	Mouse_Cell_661W_TMT_1_HpH_Fract_12.raw	Mouse_Cell_661W_TMT_1_HpH_Fract_13.raw	Mouse_Cell_661W_TMT_1_HpH_Fract_14.raw	Mouse_Cell_661W_TMT_1_HpH_Fract_15.raw	Mouse_Cell_661W_TMT_1_HpH_Fract_16.raw	Mouse_Cell_661W_TMT_1_HpH_Fract_17.raw	Mouse_Cell_661W_TMT_1_HpH_Fract_2.raw	Mouse_Cell_661W_TMT_1_HpH_Fract_3.raw	Mouse_Cell_661W_TMT_1_HpH_Fract_4.raw	Mouse_Cell_661W_TMT_1_HpH_Fract_5.raw	Mouse_Cell_661W_TMT_1_HpH_Fract_6.raw	Mouse_Cell_661W_TMT_1_HpH_Fract_7.raw	Mouse_Cell_661W_TMT_1_HpH_Fract_8.raw	Mouse_Cell_661W_TMT_1_HpH_Fract_9.raw	Found in Sample: [S1] F1: 126, Control	Found in Sample: [S2] F1: 127N, Sample	Found in Sample: [S3] F1: 127C, Sample	Found in Sample: [S4] F1: 128N, Sample	Found in Sample: [S5] F1: 128C, Sample	Found in Sample: [S6] F1: 129N, Sample	Found in Sample: [S7] F1: 129C, Sample	Found in Sample: [S8] F1: 130N, Sample	Found in Sample: [S9] F1: 130C, Sample	Found in Sample: [S10] F1: 131, Sample	Found in Sample Group: F1, 126	Found in Sample Group: F1, 127N	Found in Sample Group: F1, 127C	Found in Sample Group: F1, 128N	Found in Sample Group: F1, 128C	Found in Sample Group: F1, 129N	Found in Sample Group: F1, 129C	Found in Sample Group: F1, 130N	Found in Sample Group: F1, 130C	Found in Sample Group: F1, 131
	3668	2	13	13	40	[Master Protein] Squamous cell carcinoma antigen recognized by T-cells 3 OS=Mus musculus OX=10090 GN=Sart3 PE=1 SV=1	High	High	High	Not Found	Not Found	High	Not Found	Not Found	Not Found	High	High	High	High	High	High	Not Found	High	High	High	High	High	High	High	High	High	High	High	High	High	High	High	High	High	High	High	High	High
	Checked	Confidence	Sequence	Modifications	Qvality PEP	Qvality q-value	# Protein Groups	# Proteins	# PSMs	Master Protein Accessions	# Missed Cleavages	Theo. MH+ [Da]	Mouse_Cell_661W_TMT_1_HpH_Fract_1.raw	Mouse_Cell_661W_TMT_1_HpH_Fract_10.raw	Mouse_Cell_661W_TMT_1_HpH_Fract_11.raw	Mouse_Cell_661W_TMT_1_HpH_Fract_12.raw	Mouse_Cell_661W_TMT_1_HpH_Fract_13.raw	Mouse_Cell_661W_TMT_1_HpH_Fract_14.raw	Mouse_Cell_661W_TMT_1_HpH_Fract_15.raw	Mouse_Cell_661W_TMT_1_HpH_Fract_16.raw	Mouse_Cell_661W_TMT_1_HpH_Fract_17.raw	Mouse_Cell_661W_TMT_1_HpH_Fract_2.raw	Mouse_Cell_661W_TMT_1_HpH_Fract_3.raw	Mouse_Cell_661W_TMT_1_HpH_Fract_4.raw	Mouse_Cell_661W_TMT_1_HpH_Fract_5.raw	Mouse_Cell_661W_TMT_1_HpH_Fract_6.raw	Mouse_Cell_661W_TMT_1_HpH_Fract_7.raw	Mouse_Cell_661W_TMT_1_HpH_Fract_8.raw	Mouse_Cell_661W_TMT_1_HpH_Fract_9.raw	Found in Sample: [S1] F1: 126, Control	Found in Sample: [S2] F1: 127N, Sample	Found in Sample: [S3] F1: 127C, Sample	Found in Sample: [S4] F1: 128N, Sample	Found in Sample: [S5] F1: 128C, Sample	Found in Sample: [S6] F1: 129N, Sample	Found in Sample: [S7] F1: 129C, Sample	Found in Sample: [S8] F1: 130N, Sample	Found in Sample: [S9] F1: 130C, Sample	Found in Sample: [S10] F1: 131, Sample	Found in Sample Group: F1, 126	Found in Sample Group: F1, 127N	Found in Sample Group: F1, 127C	Found in Sample Group: F1, 128N	Found in Sample Group: F1, 128C	Found in Sample Group: F1, 129N	Found in Sample Group: F1, 129C	Found in Sample Group: F1, 130N	Found in Sample Group: F1, 130C	Found in Sample Group: F1, 131
		High	ALVENCLVPDLWIR	1xCarbamidomethyl [C6]; 1xTMT6plex [N-Term]	0.000104419	0	1	2	4	Q9JLI8	0	1927.07	Not Found	Not Found	Not Found	Not Found	Not Found	Not Found	Not Found	Not Found	Not Found	Not Found	Not Found	High	Not Found	Not Found	Not Found	Not Found	Not Found	High	High	High	High	High	High	High	High	High	High	High	High	High	High	High	High	High	High	High	High
		High	YKPYEEALLQAEAPR	2xTMT6plex [N-Term; K2]	3.73621e-09	0	1	2	1	Q9JLI8	0	2236.24	Not Found	Not Found	Not Found	Not Found	Not Found	Not Found	Not Found	Not Found	Not Found	Not Found	High	Not Found	Not Found	Not Found	Not Found	Not Found	Not Found	High	High	High	High	High	High	High	High	High	High	High	High	High	High	High	High	High	High	High	High
		High	DSVTVFVSNLPYSIEEPEVK	2xTMT6plex [N-Term; K20]	6.4657e-07	0	1	1	1	Q9JLI8	0	2710.46	Not Found	Not Found	Not Found	Not Found	Not Found	Not Found	Not Found	Not Found	Not Found	Not Found	High	Not Found	Not Found	Not Found	Not Found	Not Found	Not Found	High	High	High	High	High	High	High	High	High	High	High	High	High	High	High	High	High	High	High	High
		High	GLAYVEYENESQASQAVMK	1xOxidation [M18]; 2xTMT6plex [N-Term; K19]	5.28519e-07	0	1	1	3	Q9JLI8	0	2591.31	Not Found	High	High	Not Found	Not Found	Not Found	Not Found	Not Found	Not Found	Not Found	Not Found	Not Found	Not Found	Not Found	Not Found	Not Found	High	High	High	High	High	High	High	High	High	High	High	High	High	High	High	High	High	High	High	High	High
		High	GLAYVEYENESQASQAVMK	2xTMT6plex [N-Term; K19]	1.45212e-09	0	1	1	1	Q9JLI8	0	2575.31	Not Found	Not Found	High	Not Found	Not Found	Not Found	Not Found	Not Found	Not Found	Not Found	Not Found	Not Found	Not Found	Not Found	Not Found	Not Found	Not Found	High	High	High	High	High	High	High	High	High	High	High	High	High	High	High	High	High	High	High	High
		High	ALEYLQQEVEER	1xTMT6plex [N-Term]	1.5766e-07	0	1	1	5	Q9JLI8	0	1735.91	High	Not Found	Not Found	Not Found	Not Found	High	Not Found	Not Found	Not Found	Not Found	Not Found	Not Found	Not Found	Not Found	Not Found	Not Found	Not Found	High	High	High	High	High	High	High	High	High	High	High	High	High	High	High	High	High	High	High	High
		High	AVQCTSDYPEHVCEVLLTMER	2xCarbamidomethyl [C4; C13]; 1xTMT6plex [N-Term]	1.3941e-08	0	1	1	2	Q9JLI8	0	2766.31	Not Found	High	Not Found	Not Found	Not Found	Not Found	Not Found	Not Found	Not Found	Not Found	Not Found	Not Found	Not Found	Not Found	Not Found	Not Found	Not Found	High	High	High	High	High	High	High	High	High	High	High	High	High	High	High	High	High	High	High	High
		High	TEGTLEDWDLAIQK	2xTMT6plex [N-Term; K14]	7.60149e-05	0	1	1	1	Q9JLI8	0	2077.12	Not Found	High	Not Found	Not Found	Not Found	Not Found	Not Found	Not Found	Not Found	Not Found	Not Found	Not Found	Not Found	Not Found	Not Found	Not Found	Not Found	High	High	High	High	High	High	High	High	High	High	High	High	High	High	High	High	High	High	High	High
		High	FSESGDPSCLIMQSWAR	1xCarbamidomethyl [C9]; 1xTMT6plex [N-Term]	0.000606233	0.000139833	1	1	2	Q9JLI8	0	2200.04	Not Found	Not Found	Not Found	Not Found	Not Found	High	Not Found	Not Found	Not Found	Not Found	Not Found	Not Found	Not Found	Not Found	Not Found	Not Found	Not Found	High	High	High	High	High	High	High	High	High	High	High	High	High	High	High	High	High	High	High	High
		High	GLAYVEYENESQASQAVMK	1xOxidation [M18]; 1xDeamidated [Q/N]; 2xTMT6plex [N-Term; K19]	0.00078697	0.000139833	1	1	3	Q9JLI8	0	2592.29	Not Found	Not Found	High	Not Found	Not Found	Not Found	Not Found	Not Found	Not Found	Not Found	Not Found	Not Found	Not Found	Not Found	Not Found	Not Found	Not Found	High	High	High	High	High	High	High	High	High	High	High	High	High	High	High	High	High	High	High	High
		High	VAISNPPQR	1xTMT6plex [N-Term]	0.00257327	0.000392305	1	1	4	Q9JLI8	0	1210.71	Not Found	Not Found	Not Found	Not Found	Not Found	Not Found	Not Found	Not Found	Not Found	High	High	Not Found	Not Found	Not Found	Not Found	Not Found	Not Found	High	High	High	High	High	High	High	High	High	High	High	High	High	High	High	High	High	High	High	High
		High	AVQCTSDYPEHVCEVLLTMER	1xDeamidated [Q3]; 2xCarbamidomethyl [C4; C13]; 1xTMT6plex [N-Term]	0.002508	0.000392305	1	1	2	Q9JLI8	0	2767.29	Not Found	High	Not Found	Not Found	Not Found	Not Found	Not Found	Not Found	Not Found	Not Found	Not Found	Not Found	Not Found	Not Found	Not Found	Not Found	Not Found	High	High	High	High	High	High	High	High	High	High	High	High	High	High	High	High	High	High	High	High
		High	GLAIWEAYR	1xTMT6plex [N-Term]	0.00310867	0.00040345	1	2	3	Q9JLI8	0	1307.73	Not Found	Not Found	Not Found	Not Found	Not Found	Not Found	Not Found	Not Found	Not Found	Not Found	Not Found	Not Found	Not Found	High	High	Not Found	Not Found	High	High	High	High	High	High	High	High	High	High	High	High	High	High	High	High	High	High	High	High
		High	TEGTLEDWDLAIQK	1xTMT6plex [K14]	0.00395836	0.000417981	1	1	1	Q9JLI8	0	1847.96	Not Found	Not Found	Not Found	Not Found	Not Found	High	Not Found	Not Found	Not Found	Not Found	Not Found	Not Found	Not Found	Not Found	Not Found	Not Found	Not Found	High	High	High	High	High	High	High	High	High	High	High	High	High	High	High	High	High	High	High	High
		High	LAEYQAYIDFEMK	1xOxidation [M12]; 2xTMT6plex [N-Term; K13]	0.00960774	0.000953999	1	2	1	Q9JLI8	0	2095.08	Not Found	Not Found	Not Found	Not Found	Not Found	Not Found	Not Found	Not Found	Not Found	Not Found	High	Not Found	Not Found	Not Found	Not Found	Not Found	Not Found	High	High	High	High	High	High	High	High	High	High	High	High	High	High	High	High	High	High	High	High
		High	SAQQALELDR	1xTMT6plex [N-Term]	0.0249418	0.00227637	1	1	2	Q9JLI8	0	1359.74	Not Found	Not Found	Not Found	Not Found	Not Found	Not Found	Not Found	Not Found	Not Found	Not Found	Not Found	Not Found	High	Not Found	Not Found	Not Found	Not Found	High	High	High	High	High	High	High	High	High	High	High	High	High	High	High	High	High	High	High	High
		High	ALEYLQQEVEER	1xDeamidated [Q7]; 1xTMT6plex [N-Term]	0.0471217	0.00427221	1	1	2	Q9JLI8	0	1736.89	Not Found	Not Found	Not Found	Not Found	Not Found	High	Not Found	Not Found	Not Found	Not Found	Not Found	Not Found	Not Found	Not Found	Not Found	Not Found	Not Found	High	High	High	High	High	High	High	High	High	High	High	High	High	High	High	High	High	High	High	High
		High	GPGWDLQR	1xTMT6plex [N-Term]	0.0554273	0.00484953	1	2	2	Q9JLI8	0	1157.63	Not Found	Not Found	Not Found	Not Found	Not Found	Not Found	Not Found	Not Found	Not Found	Not Found	Not Found	Not Found	Not Found	High	Not Found	Not Found	Not Found	High	High	High	High	High	High	High	High	High	High	High	High	High	High	High	High	High	High	High	High
High	Master Protein	Q8VCE9	Pleckstrin homology domain-containing family H member 3 OS=Mus musculus OX=10090 GN=Plekhh3 PE=2 SV=1	0.00149278	5.53091	1.88442	1	1	1	1	796	85.788	7.3	Not Found	High	Not Found	Not Found	Not Found	Not Found	Not Found	Not Found	Not Found	Not Found	Not Found	Not Found	Not Found	Not Found	Not Found	Not Found	Not Found	High	High	High	High	High	High	High	High	High	High	High	High	High	High	High	High	High	High	High
Checked	Protein Group ID	# Proteins	# Unique Peptides	# Peptides	# PSMs	Group Description	Mouse_Cell_661W_TMT_1_HpH_Fract_1.raw	Mouse_Cell_661W_TMT_1_HpH_Fract_10.raw	Mouse_Cell_661W_TMT_1_HpH_Fract_11.raw	Mouse_Cell_661W_TMT_1_HpH_Fract_12.raw	Mouse_Cell_661W_TMT_1_HpH_Fract_13.raw	Mouse_Cell_661W_TMT_1_HpH_Fract_14.raw	Mouse_Cell_661W_TMT_1_HpH_Fract_15.raw	Mouse_Cell_661W_TMT_1_HpH_Fract_16.raw	Mouse_Cell_661W_TMT_1_HpH_Fract_17.raw	Mouse_Cell_661W_TMT_1_HpH_Fract_2.raw	Mouse_Cell_661W_TMT_1_HpH_Fract_3.raw	Mouse_Cell_661W_TMT_1_HpH_Fract_4.raw	Mouse_Cell_661W_TMT_1_HpH_Fract_5.raw	Mouse_Cell_661W_TMT_1_HpH_Fract_6.raw	Mouse_Cell_661W_TMT_1_HpH_Fract_7.raw	Mouse_Cell_661W_TMT_1_HpH_Fract_8.raw	Mouse_Cell_661W_TMT_1_HpH_Fract_9.raw	Found in Sample: [S1] F1: 126, Control	Found in Sample: [S2] F1: 127N, Sample	Found in Sample: [S3] F1: 127C, Sample	Found in Sample: [S4] F1: 128N, Sample	Found in Sample: [S5] F1: 128C, Sample	Found in Sample: [S6] F1: 129N, Sample	Found in Sample: [S7] F1: 129C, Sample	Found in Sample: [S8] F1: 130N, Sample	Found in Sample: [S9] F1: 130C, Sample	Found in Sample: [S10] F1: 131, Sample	Found in Sample Group: F1, 126	Found in Sample Group: F1, 127N	Found in Sample Group: F1, 127C	Found in Sample Group: F1, 128N	Found in Sample Group: F1, 128C	Found in Sample Group: F1, 129N	Found in Sample Group: F1, 129C	Found in Sample Group: F1, 130N	Found in Sample Group: F1, 130C	Found in Sample Group: F1, 131
	3667	4	1	1	1	[Master Protein] Pleckstrin homology domain-containing family H member 3 OS=Mus musculus OX=10090 GN=Plekhh3 PE=2 SV=1	Not Found	High	Not Found	Not Found	Not Found	Not Found	Not Found	Not Found	Not Found	Not Found	Not Found	Not Found	Not Found	Not Found	Not Found	Not Found	Not Found	High	High	High	High	High	High	High	High	High	High	High	High	High	High	High	High	High	High	High	High
	Checked	Confidence	Sequence	Modifications	Qvality PEP	Qvality q-value	# Protein Groups	# Proteins	# PSMs	Master Protein Accessions	# Missed Cleavages	Theo. MH+ [Da]	Mouse_Cell_661W_TMT_1_HpH_Fract_1.raw	Mouse_Cell_661W_TMT_1_HpH_Fract_10.raw	Mouse_Cell_661W_TMT_1_HpH_Fract_11.raw	Mouse_Cell_661W_TMT_1_HpH_Fract_12.raw	Mouse_Cell_661W_TMT_1_HpH_Fract_13.raw	Mouse_Cell_661W_TMT_1_HpH_Fract_14.raw	Mouse_Cell_661W_TMT_1_HpH_Fract_15.raw	Mouse_Cell_661W_TMT_1_HpH_Fract_16.raw	Mouse_Cell_661W_TMT_1_HpH_Fract_17.raw	Mouse_Cell_661W_TMT_1_HpH_Fract_2.raw	Mouse_Cell_661W_TMT_1_HpH_Fract_3.raw	Mouse_Cell_661W_TMT_1_HpH_Fract_4.raw	Mouse_Cell_661W_TMT_1_HpH_Fract_5.raw	Mouse_Cell_661W_TMT_1_HpH_Fract_6.raw	Mouse_Cell_661W_TMT_1_HpH_Fract_7.raw	Mouse_Cell_661W_TMT_1_HpH_Fract_8.raw	Mouse_Cell_661W_TMT_1_HpH_Fract_9.raw	Found in Sample: [S1] F1: 126, Control	Found in Sample: [S2] F1: 127N, Sample	Found in Sample: [S3] F1: 127C, Sample	Found in Sample: [S4] F1: 128N, Sample	Found in Sample: [S5] F1: 128C, Sample	Found in Sample: [S6] F1: 129N, Sample	Found in Sample: [S7] F1: 129C, Sample	Found in Sample: [S8] F1: 130N, Sample	Found in Sample: [S9] F1: 130C, Sample	Found in Sample: [S10] F1: 131, Sample	Found in Sample Group: F1, 126	Found in Sample Group: F1, 127N	Found in Sample Group: F1, 127C	Found in Sample Group: F1, 128N	Found in Sample Group: F1, 128C	Found in Sample Group: F1, 129N	Found in Sample Group: F1, 129C	Found in Sample Group: F1, 130N	Found in Sample Group: F1, 130C	Found in Sample Group: F1, 131
		High	DLPALQDELFLQLAK	2xTMT6plex [N-Term; K15]	3.32611e-06	0	1	4	1	Q8VCE9	0	2172.27	Not Found	High	Not Found	Not Found	Not Found	Not Found	Not Found	Not Found	Not Found	Not Found	Not Found	Not Found	Not Found	Not Found	Not Found	Not Found	Not Found	High	High	High	High	High	High	High	High	High	High	High	High	High	High	High	High	High	High	High	High
High	Master Protein	P70452	Syntaxin-4 OS=Mus musculus OX=10090 GN=Stx4 PE=1 SV=1	0	15.3855	20.1342	3	3	3	1	298	34.144	6.14	High	Not Found	Not Found	High	High	Not Found	Not Found	Not Found	Not Found	Not Found	Not Found	Not Found	Not Found	Not Found	Not Found	Not Found	Not Found	High	High	High	High	High	High	High	High	High	High	High	High	High	High	High	High	High	High	High
Checked	Protein Group ID	# Proteins	# Unique Peptides	# Peptides	# PSMs	Group Description	Mouse_Cell_661W_TMT_1_HpH_Fract_1.raw	Mouse_Cell_661W_TMT_1_HpH_Fract_10.raw	Mouse_Cell_661W_TMT_1_HpH_Fract_11.raw	Mouse_Cell_661W_TMT_1_HpH_Fract_12.raw	Mouse_Cell_661W_TMT_1_HpH_Fract_13.raw	Mouse_Cell_661W_TMT_1_HpH_Fract_14.raw	Mouse_Cell_661W_TMT_1_HpH_Fract_15.raw	Mouse_Cell_661W_TMT_1_HpH_Fract_16.raw	Mouse_Cell_661W_TMT_1_HpH_Fract_17.raw	Mouse_Cell_661W_TMT_1_HpH_Fract_2.raw	Mouse_Cell_661W_TMT_1_HpH_Fract_3.raw	Mouse_Cell_661W_TMT_1_HpH_Fract_4.raw	Mouse_Cell_661W_TMT_1_HpH_Fract_5.raw	Mouse_Cell_661W_TMT_1_HpH_Fract_6.raw	Mouse_Cell_661W_TMT_1_HpH_Fract_7.raw	Mouse_Cell_661W_TMT_1_HpH_Fract_8.raw	Mouse_Cell_661W_TMT_1_HpH_Fract_9.raw	Found in Sample: [S1] F1: 126, Control	Found in Sample: [S2] F1: 127N, Sample	Found in Sample: [S3] F1: 127C, Sample	Found in Sample: [S4] F1: 128N, Sample	Found in Sample: [S5] F1: 128C, Sample	Found in Sample: [S6] F1: 129N, Sample	Found in Sample: [S7] F1: 129C, Sample	Found in Sample: [S8] F1: 130N, Sample	Found in Sample: [S9] F1: 130C, Sample	Found in Sample: [S10] F1: 131, Sample	Found in Sample Group: F1, 126	Found in Sample Group: F1, 127N	Found in Sample Group: F1, 127C	Found in Sample Group: F1, 128N	Found in Sample Group: F1, 128C	Found in Sample Group: F1, 129N	Found in Sample Group: F1, 129C	Found in Sample Group: F1, 130N	Found in Sample Group: F1, 130C	Found in Sample Group: F1, 131
	3666	1	3	3	3	[Master Protein] Syntaxin-4 OS=Mus musculus OX=10090 GN=Stx4 PE=1 SV=1	High	Not Found	Not Found	High	High	Not Found	Not Found	Not Found	Not Found	Not Found	Not Found	Not Found	Not Found	Not Found	Not Found	Not Found	Not Found	High	High	High	High	High	High	High	High	High	High	High	High	High	High	High	High	High	High	High	High
	Checked	Confidence	Sequence	Modifications	Qvality PEP	Qvality q-value	# Protein Groups	# Proteins	# PSMs	Master Protein Accessions	# Missed Cleavages	Theo. MH+ [Da]	Mouse_Cell_661W_TMT_1_HpH_Fract_1.raw	Mouse_Cell_661W_TMT_1_HpH_Fract_10.raw	Mouse_Cell_661W_TMT_1_HpH_Fract_11.raw	Mouse_Cell_661W_TMT_1_HpH_Fract_12.raw	Mouse_Cell_661W_TMT_1_HpH_Fract_13.raw	Mouse_Cell_661W_TMT_1_HpH_Fract_14.raw	Mouse_Cell_661W_TMT_1_HpH_Fract_15.raw	Mouse_Cell_661W_TMT_1_HpH_Fract_16.raw	Mouse_Cell_661W_TMT_1_HpH_Fract_17.raw	Mouse_Cell_661W_TMT_1_HpH_Fract_2.raw	Mouse_Cell_661W_TMT_1_HpH_Fract_3.raw	Mouse_Cell_661W_TMT_1_HpH_Fract_4.raw	Mouse_Cell_661W_TMT_1_HpH_Fract_5.raw	Mouse_Cell_661W_TMT_1_HpH_Fract_6.raw	Mouse_Cell_661W_TMT_1_HpH_Fract_7.raw	Mouse_Cell_661W_TMT_1_HpH_Fract_8.raw	Mouse_Cell_661W_TMT_1_HpH_Fract_9.raw	Found in Sample: [S1] F1: 126, Control	Found in Sample: [S2] F1: 127N, Sample	Found in Sample: [S3] F1: 127C, Sample	Found in Sample: [S4] F1: 128N, Sample	Found in Sample: [S5] F1: 128C, Sample	Found in Sample: [S6] F1: 129N, Sample	Found in Sample: [S7] F1: 129C, Sample	Found in Sample: [S8] F1: 130N, Sample	Found in Sample: [S9] F1: 130C, Sample	Found in Sample: [S10] F1: 131, Sample	Found in Sample Group: F1, 126	Found in Sample Group: F1, 127N	Found in Sample Group: F1, 127C	Found in Sample Group: F1, 128N	Found in Sample Group: F1, 128C	Found in Sample Group: F1, 129N	Found in Sample Group: F1, 129C	Found in Sample Group: F1, 130N	Found in Sample Group: F1, 130C	Found in Sample Group: F1, 131
		High	AIEPQKEEADENYNSVNTR	2xTMT6plex [N-Term; K6]	2.06394e-05	0	1	1	1	P70452	1	2665.35	Not Found	Not Found	Not Found	Not Found	High	Not Found	Not Found	Not Found	Not Found	Not Found	Not Found	Not Found	Not Found	Not Found	Not Found	Not Found	Not Found	High	High	High	High	High	High	High	High	High	High	High	High	High	High	High	High	High	High	High	High
		High	LGSPDDEFFQK	2xTMT6plex [N-Term; K11]	3.81926e-05	0	1	1	1	P70452	0	1740.92	Not Found	Not Found	Not Found	High	Not Found	Not Found	Not Found	Not Found	Not Found	Not Found	Not Found	Not Found	Not Found	Not Found	Not Found	Not Found	Not Found	High	High	High	High	High	High	High	High	High	High	High	High	High	High	High	High	High	High	High	High
		High	ITNAGMVSDEELEQMLDSGQSEVFVSNILK	1xOxidation [M6]; 2xTMT6plex [N-Term; K30]	8.91567e-07	0	1	1	1	P70452	0	3757.89	High	Not Found	Not Found	Not Found	Not Found	Not Found	Not Found	Not Found	Not Found	Not Found	Not Found	Not Found	Not Found	Not Found	Not Found	Not Found	Not Found	High	High	High	High	High	High	High	High	High	High	High	High	High	High	High	High	High	High	High	High
High	Master Protein	Q9Z2C4	Myotubularin-related protein 1 OS=Mus musculus OX=10090 GN=Mtmr1 PE=1 SV=1	0	7.40879	5.68012	4	6	3	1	669	75.266	6.8	High	Not Found	Not Found	Not Found	Not Found	Not Found	Not Found	Not Found	Not Found	High	Not Found	Not Found	Not Found	High	High	Not Found	Not Found	High	High	High	High	High	High	High	High	High	High	High	High	High	High	High	High	High	High	High
Checked	Protein Group ID	# Proteins	# Unique Peptides	# Peptides	# PSMs	Group Description	Mouse_Cell_661W_TMT_1_HpH_Fract_1.raw	Mouse_Cell_661W_TMT_1_HpH_Fract_10.raw	Mouse_Cell_661W_TMT_1_HpH_Fract_11.raw	Mouse_Cell_661W_TMT_1_HpH_Fract_12.raw	Mouse_Cell_661W_TMT_1_HpH_Fract_13.raw	Mouse_Cell_661W_TMT_1_HpH_Fract_14.raw	Mouse_Cell_661W_TMT_1_HpH_Fract_15.raw	Mouse_Cell_661W_TMT_1_HpH_Fract_16.raw	Mouse_Cell_661W_TMT_1_HpH_Fract_17.raw	Mouse_Cell_661W_TMT_1_HpH_Fract_2.raw	Mouse_Cell_661W_TMT_1_HpH_Fract_3.raw	Mouse_Cell_661W_TMT_1_HpH_Fract_4.raw	Mouse_Cell_661W_TMT_1_HpH_Fract_5.raw	Mouse_Cell_661W_TMT_1_HpH_Fract_6.raw	Mouse_Cell_661W_TMT_1_HpH_Fract_7.raw	Mouse_Cell_661W_TMT_1_HpH_Fract_8.raw	Mouse_Cell_661W_TMT_1_HpH_Fract_9.raw	Found in Sample: [S1] F1: 126, Control	Found in Sample: [S2] F1: 127N, Sample	Found in Sample: [S3] F1: 127C, Sample	Found in Sample: [S4] F1: 128N, Sample	Found in Sample: [S5] F1: 128C, Sample	Found in Sample: [S6] F1: 129N, Sample	Found in Sample: [S7] F1: 129C, Sample	Found in Sample: [S8] F1: 130N, Sample	Found in Sample: [S9] F1: 130C, Sample	Found in Sample: [S10] F1: 131, Sample	Found in Sample Group: F1, 126	Found in Sample Group: F1, 127N	Found in Sample Group: F1, 127C	Found in Sample Group: F1, 128N	Found in Sample Group: F1, 128C	Found in Sample Group: F1, 129N	Found in Sample Group: F1, 129C	Found in Sample Group: F1, 130N	Found in Sample Group: F1, 130C	Found in Sample Group: F1, 131
	3665	7	3	4	6	[Master Protein] Myotubularin-related protein 1 OS=Mus musculus OX=10090 GN=Mtmr1 PE=1 SV=1	High	Not Found	Not Found	Not Found	Not Found	Not Found	Not Found	Not Found	Not Found	High	Not Found	Not Found	Not Found	High	High	Not Found	Not Found	High	High	High	High	High	High	High	High	High	High	High	High	High	High	High	High	High	High	High	High
	Checked	Confidence	Sequence	Modifications	Qvality PEP	Qvality q-value	# Protein Groups	# Proteins	# PSMs	Master Protein Accessions	# Missed Cleavages	Theo. MH+ [Da]	Mouse_Cell_661W_TMT_1_HpH_Fract_1.raw	Mouse_Cell_661W_TMT_1_HpH_Fract_10.raw	Mouse_Cell_661W_TMT_1_HpH_Fract_11.raw	Mouse_Cell_661W_TMT_1_HpH_Fract_12.raw	Mouse_Cell_661W_TMT_1_HpH_Fract_13.raw	Mouse_Cell_661W_TMT_1_HpH_Fract_14.raw	Mouse_Cell_661W_TMT_1_HpH_Fract_15.raw	Mouse_Cell_661W_TMT_1_HpH_Fract_16.raw	Mouse_Cell_661W_TMT_1_HpH_Fract_17.raw	Mouse_Cell_661W_TMT_1_HpH_Fract_2.raw	Mouse_Cell_661W_TMT_1_HpH_Fract_3.raw	Mouse_Cell_661W_TMT_1_HpH_Fract_4.raw	Mouse_Cell_661W_TMT_1_HpH_Fract_5.raw	Mouse_Cell_661W_TMT_1_HpH_Fract_6.raw	Mouse_Cell_661W_TMT_1_HpH_Fract_7.raw	Mouse_Cell_661W_TMT_1_HpH_Fract_8.raw	Mouse_Cell_661W_TMT_1_HpH_Fract_9.raw	Found in Sample: [S1] F1: 126, Control	Found in Sample: [S2] F1: 127N, Sample	Found in Sample: [S3] F1: 127C, Sample	Found in Sample: [S4] F1: 128N, Sample	Found in Sample: [S5] F1: 128C, Sample	Found in Sample: [S6] F1: 129N, Sample	Found in Sample: [S7] F1: 129C, Sample	Found in Sample: [S8] F1: 130N, Sample	Found in Sample: [S9] F1: 130C, Sample	Found in Sample: [S10] F1: 131, Sample	Found in Sample Group: F1, 126	Found in Sample Group: F1, 127N	Found in Sample Group: F1, 127C	Found in Sample Group: F1, 128N	Found in Sample Group: F1, 128C	Found in Sample Group: F1, 129N	Found in Sample Group: F1, 129C	Found in Sample Group: F1, 130N	Found in Sample Group: F1, 130C	Found in Sample Group: F1, 131
		High	DPHFVLDVPLGVISR	1xTMT6plex [N-Term]	0.0011322	0.000192734	1	7	2	Q9Z2C4	0	1893.08	Not Found	Not Found	Not Found	Not Found	Not Found	Not Found	Not Found	Not Found	Not Found	High	Not Found	Not Found	Not Found	Not Found	Not Found	Not Found	Not Found	High	High	High	High	High	High	High	High	High	High	High	High	High	High	High	High	High	High	High	High
		High	EWISFGHR	1xTMT6plex [N-Term]	0.0427745	0.00383297	3	7	4	Q6ZPE2; Q9Z2C4; Q9Z2D1	0	1260.67	Not Found	Not Found	Not Found	Not Found	Not Found	Not Found	Not Found	Not Found	Not Found	Not Found	Not Found	Not Found	Not Found	Not Found	High	Not Found	Not Found	Not Found	Not Found	Not Found	High	High	High	High	Not Found	High	High	Not Found	Not Found	Not Found	High	High	High	High	Not Found	High	High
		High	LTIFDAR	1xTMT6plex [N-Term]	0.0835388	0.00699406	1	2	1	Q9Z2C4	0	1064.63	Not Found	Not Found	Not Found	Not Found	Not Found	Not Found	Not Found	Not Found	Not Found	Not Found	Not Found	Not Found	Not Found	High	Not Found	Not Found	Not Found	High	High	High	High	High	High	High	High	High	High	High	High	High	High	High	High	High	High	High	High
		High	VLLAGAVR	1xTMT6plex [N-Term]	0.0952384	0.00803289	1	2	1	Q9Z2C4	0	1027.68	High	Not Found	Not Found	Not Found	Not Found	Not Found	Not Found	Not Found	Not Found	Not Found	Not Found	Not Found	Not Found	Not Found	Not Found	Not Found	Not Found	High	High	High	High	High	High	High	High	High	High	High	High	High	High	High	High	High	High	High	High
High	Master Protein	Q80TY0	Formin-binding protein 1 OS=Mus musculus OX=10090 GN=Fnbp1 PE=1 SV=2	0	19.6117	7.95455	5	7	5	1	616	71.299	5.67	High	Not Found	Not Found	Not Found	Not Found	Not Found	Not Found	Not Found	Not Found	High	High	Not Found	Not Found	Not Found	Not Found	Not Found	High	High	High	High	High	High	High	High	High	High	High	High	High	High	High	High	High	High	High	High
Checked	Protein Group ID	# Proteins	# Unique Peptides	# Peptides	# PSMs	Group Description	Mouse_Cell_661W_TMT_1_HpH_Fract_1.raw	Mouse_Cell_661W_TMT_1_HpH_Fract_10.raw	Mouse_Cell_661W_TMT_1_HpH_Fract_11.raw	Mouse_Cell_661W_TMT_1_HpH_Fract_12.raw	Mouse_Cell_661W_TMT_1_HpH_Fract_13.raw	Mouse_Cell_661W_TMT_1_HpH_Fract_14.raw	Mouse_Cell_661W_TMT_1_HpH_Fract_15.raw	Mouse_Cell_661W_TMT_1_HpH_Fract_16.raw	Mouse_Cell_661W_TMT_1_HpH_Fract_17.raw	Mouse_Cell_661W_TMT_1_HpH_Fract_2.raw	Mouse_Cell_661W_TMT_1_HpH_Fract_3.raw	Mouse_Cell_661W_TMT_1_HpH_Fract_4.raw	Mouse_Cell_661W_TMT_1_HpH_Fract_5.raw	Mouse_Cell_661W_TMT_1_HpH_Fract_6.raw	Mouse_Cell_661W_TMT_1_HpH_Fract_7.raw	Mouse_Cell_661W_TMT_1_HpH_Fract_8.raw	Mouse_Cell_661W_TMT_1_HpH_Fract_9.raw	Found in Sample: [S1] F1: 126, Control	Found in Sample: [S2] F1: 127N, Sample	Found in Sample: [S3] F1: 127C, Sample	Found in Sample: [S4] F1: 128N, Sample	Found in Sample: [S5] F1: 128C, Sample	Found in Sample: [S6] F1: 129N, Sample	Found in Sample: [S7] F1: 129C, Sample	Found in Sample: [S8] F1: 130N, Sample	Found in Sample: [S9] F1: 130C, Sample	Found in Sample: [S10] F1: 131, Sample	Found in Sample Group: F1, 126	Found in Sample Group: F1, 127N	Found in Sample Group: F1, 127C	Found in Sample Group: F1, 128N	Found in Sample Group: F1, 128C	Found in Sample Group: F1, 129N	Found in Sample Group: F1, 129C	Found in Sample Group: F1, 130N	Found in Sample Group: F1, 130C	Found in Sample Group: F1, 131
	3664	14	5	5	7	[Master Protein] Formin-binding protein 1 OS=Mus musculus OX=10090 GN=Fnbp1 PE=1 SV=2	High	Not Found	Not Found	Not Found	Not Found	Not Found	Not Found	Not Found	Not Found	High	High	Not Found	Not Found	Not Found	Not Found	Not Found	High	High	High	High	High	High	High	High	High	High	High	High	High	High	High	High	High	High	High	High	High
	Checked	Confidence	Sequence	Modifications	Qvality PEP	Qvality q-value	# Protein Groups	# Proteins	# PSMs	Master Protein Accessions	# Missed Cleavages	Theo. MH+ [Da]	Mouse_Cell_661W_TMT_1_HpH_Fract_1.raw	Mouse_Cell_661W_TMT_1_HpH_Fract_10.raw	Mouse_Cell_661W_TMT_1_HpH_Fract_11.raw	Mouse_Cell_661W_TMT_1_HpH_Fract_12.raw	Mouse_Cell_661W_TMT_1_HpH_Fract_13.raw	Mouse_Cell_661W_TMT_1_HpH_Fract_14.raw	Mouse_Cell_661W_TMT_1_HpH_Fract_15.raw	Mouse_Cell_661W_TMT_1_HpH_Fract_16.raw	Mouse_Cell_661W_TMT_1_HpH_Fract_17.raw	Mouse_Cell_661W_TMT_1_HpH_Fract_2.raw	Mouse_Cell_661W_TMT_1_HpH_Fract_3.raw	Mouse_Cell_661W_TMT_1_HpH_Fract_4.raw	Mouse_Cell_661W_TMT_1_HpH_Fract_5.raw	Mouse_Cell_661W_TMT_1_HpH_Fract_6.raw	Mouse_Cell_661W_TMT_1_HpH_Fract_7.raw	Mouse_Cell_661W_TMT_1_HpH_Fract_8.raw	Mouse_Cell_661W_TMT_1_HpH_Fract_9.raw	Found in Sample: [S1] F1: 126, Control	Found in Sample: [S2] F1: 127N, Sample	Found in Sample: [S3] F1: 127C, Sample	Found in Sample: [S4] F1: 128N, Sample	Found in Sample: [S5] F1: 128C, Sample	Found in Sample: [S6] F1: 129N, Sample	Found in Sample: [S7] F1: 129C, Sample	Found in Sample: [S8] F1: 130N, Sample	Found in Sample: [S9] F1: 130C, Sample	Found in Sample: [S10] F1: 131, Sample	Found in Sample Group: F1, 126	Found in Sample Group: F1, 127N	Found in Sample Group: F1, 127C	Found in Sample Group: F1, 128N	Found in Sample Group: F1, 128C	Found in Sample Group: F1, 129N	Found in Sample Group: F1, 129C	Found in Sample Group: F1, 130N	Found in Sample Group: F1, 130C	Found in Sample Group: F1, 131
		High	FEAWLAEVEGR	1xTMT6plex [N-Term]	1.35424e-05	0	1	11	2	Q80TY0	0	1535.81	Not Found	Not Found	Not Found	Not Found	Not Found	Not Found	Not Found	Not Found	Not Found	High	Not Found	Not Found	Not Found	Not Found	Not Found	Not Found	Not Found	High	High	High	High	High	High	High	High	High	High	High	High	High	High	High	High	High	High	High	High
		High	LTEVTQNIEK	2xTMT6plex [N-Term; K10]	1.5071e-05	0	1	11	1	Q80TY0	0	1632.96	Not Found	Not Found	Not Found	Not Found	Not Found	Not Found	Not Found	Not Found	Not Found	Not Found	High	Not Found	Not Found	Not Found	Not Found	Not Found	Not Found	High	High	High	High	High	High	High	High	High	High	High	High	High	High	High	High	High	High	High	High
		High	TEIELSYAK	2xTMT6plex [N-Term; K9]	0.00227936	0.000349957	1	12	1	Q80TY0	0	1511.87	High	Not Found	Not Found	Not Found	Not Found	Not Found	Not Found	Not Found	Not Found	Not Found	Not Found	Not Found	Not Found	Not Found	Not Found	Not Found	Not Found	High	High	High	High	High	High	High	High	High	High	High	High	High	High	High	High	High	High	High	High
		High	HTQWGIDILEK	2xTMT6plex [N-Term; K11]	0.00317096	0.00040345	1	12	1	Q80TY0	0	1798.03	Not Found	Not Found	Not Found	Not Found	Not Found	Not Found	Not Found	Not Found	Not Found	Not Found	Not Found	Not Found	Not Found	Not Found	Not Found	Not Found	High	High	High	High	High	High	High	High	High	High	High	High	High	High	High	High	High	High	High	High	High
		High	AAESIDQK	2xTMT6plex [N-Term; K8]	0.00382596	0.000417981	1	10	1	Q80TY0	0	1319.76	Not Found	Not Found	Not Found	Not Found	Not Found	Not Found	Not Found	Not Found	Not Found	Not Found	High	Not Found	Not Found	Not Found	Not Found	Not Found	Not Found	High	High	High	High	High	High	High	High	High	High	High	High	High	High	High	High	High	High	High	High
		High	TEIELSYAK	1xTMT6plex [K9]	0.100825	0.00856939	1	12	1	Q80TY0	0	1282.71	Not Found	Not Found	Not Found	Not Found	Not Found	Not Found	Not Found	Not Found	Not Found	Not Found	High	Not Found	Not Found	Not Found	Not Found	Not Found	Not Found	High	High	High	High	High	High	High	High	High	High	High	High	High	High	High	High	High	High	High	High
High	Master Protein	P62852	40S ribosomal protein S25 OS=Mus musculus OX=10090 GN=Rps25 PE=1 SV=1	0	25.0869	24	4	23	4	1	125	13.734	10.11	Not Found	High	High	High	High	High	Not Found	Not Found	Not Found	Not Found	Not Found	Not Found	Not Found	Not Found	High	High	Not Found	High	High	High	High	High	High	High	High	High	High	High	High	High	High	High	High	High	High	High
Checked	Protein Group ID	# Proteins	# Unique Peptides	# Peptides	# PSMs	Group Description	Mouse_Cell_661W_TMT_1_HpH_Fract_1.raw	Mouse_Cell_661W_TMT_1_HpH_Fract_10.raw	Mouse_Cell_661W_TMT_1_HpH_Fract_11.raw	Mouse_Cell_661W_TMT_1_HpH_Fract_12.raw	Mouse_Cell_661W_TMT_1_HpH_Fract_13.raw	Mouse_Cell_661W_TMT_1_HpH_Fract_14.raw	Mouse_Cell_661W_TMT_1_HpH_Fract_15.raw	Mouse_Cell_661W_TMT_1_HpH_Fract_16.raw	Mouse_Cell_661W_TMT_1_HpH_Fract_17.raw	Mouse_Cell_661W_TMT_1_HpH_Fract_2.raw	Mouse_Cell_661W_TMT_1_HpH_Fract_3.raw	Mouse_Cell_661W_TMT_1_HpH_Fract_4.raw	Mouse_Cell_661W_TMT_1_HpH_Fract_5.raw	Mouse_Cell_661W_TMT_1_HpH_Fract_6.raw	Mouse_Cell_661W_TMT_1_HpH_Fract_7.raw	Mouse_Cell_661W_TMT_1_HpH_Fract_8.raw	Mouse_Cell_661W_TMT_1_HpH_Fract_9.raw	Found in Sample: [S1] F1: 126, Control	Found in Sample: [S2] F1: 127N, Sample	Found in Sample: [S3] F1: 127C, Sample	Found in Sample: [S4] F1: 128N, Sample	Found in Sample: [S5] F1: 128C, Sample	Found in Sample: [S6] F1: 129N, Sample	Found in Sample: [S7] F1: 129C, Sample	Found in Sample: [S8] F1: 130N, Sample	Found in Sample: [S9] F1: 130C, Sample	Found in Sample: [S10] F1: 131, Sample	Found in Sample Group: F1, 126	Found in Sample Group: F1, 127N	Found in Sample Group: F1, 127C	Found in Sample Group: F1, 128N	Found in Sample Group: F1, 128C	Found in Sample Group: F1, 129N	Found in Sample Group: F1, 129C	Found in Sample Group: F1, 130N	Found in Sample Group: F1, 130C	Found in Sample Group: F1, 131
	3663	2	4	4	23	[Master Protein] 40S ribosomal protein S25 OS=Mus musculus OX=10090 GN=Rps25 PE=1 SV=1	Not Found	High	High	High	High	High	Not Found	Not Found	Not Found	Not Found	Not Found	Not Found	Not Found	Not Found	High	High	Not Found	High	High	High	High	High	High	High	High	High	High	High	High	High	High	High	High	High	High	High	High
	Checked	Confidence	Sequence	Modifications	Qvality PEP	Qvality q-value	# Protein Groups	# Proteins	# PSMs	Master Protein Accessions	# Missed Cleavages	Theo. MH+ [Da]	Mouse_Cell_661W_TMT_1_HpH_Fract_1.raw	Mouse_Cell_661W_TMT_1_HpH_Fract_10.raw	Mouse_Cell_661W_TMT_1_HpH_Fract_11.raw	Mouse_Cell_661W_TMT_1_HpH_Fract_12.raw	Mouse_Cell_661W_TMT_1_HpH_Fract_13.raw	Mouse_Cell_661W_TMT_1_HpH_Fract_14.raw	Mouse_Cell_661W_TMT_1_HpH_Fract_15.raw	Mouse_Cell_661W_TMT_1_HpH_Fract_16.raw	Mouse_Cell_661W_TMT_1_HpH_Fract_17.raw	Mouse_Cell_661W_TMT_1_HpH_Fract_2.raw	Mouse_Cell_661W_TMT_1_HpH_Fract_3.raw	Mouse_Cell_661W_TMT_1_HpH_Fract_4.raw	Mouse_Cell_661W_TMT_1_HpH_Fract_5.raw	Mouse_Cell_661W_TMT_1_HpH_Fract_6.raw	Mouse_Cell_661W_TMT_1_HpH_Fract_7.raw	Mouse_Cell_661W_TMT_1_HpH_Fract_8.raw	Mouse_Cell_661W_TMT_1_HpH_Fract_9.raw	Found in Sample: [S1] F1: 126, Control	Found in Sample: [S2] F1: 127N, Sample	Found in Sample: [S3] F1: 127C, Sample	Found in Sample: [S4] F1: 128N, Sample	Found in Sample: [S5] F1: 128C, Sample	Found in Sample: [S6] F1: 129N, Sample	Found in Sample: [S7] F1: 129C, Sample	Found in Sample: [S8] F1: 130N, Sample	Found in Sample: [S9] F1: 130C, Sample	Found in Sample: [S10] F1: 131, Sample	Found in Sample Group: F1, 126	Found in Sample Group: F1, 127N	Found in Sample Group: F1, 127C	Found in Sample Group: F1, 128N	Found in Sample Group: F1, 128C	Found in Sample Group: F1, 129N	Found in Sample Group: F1, 129C	Found in Sample Group: F1, 130N	Found in Sample Group: F1, 130C	Found in Sample Group: F1, 131
		High	LNNLVLFDK	2xTMT6plex [N-Term; K9]	1.89004e-05	0	1	2	4	P62852	0	1533.94	Not Found	Not Found	High	High	Not Found	Not Found	Not Found	Not Found	Not Found	Not Found	Not Found	Not Found	Not Found	Not Found	Not Found	Not Found	Not Found	High	High	High	High	High	High	High	High	High	High	High	High	High	High	High	High	High	High	High	High
		High	AALQELLSK	2xTMT6plex [N-Term; K9]	1.85472e-05	0	1	2	5	P62852	0	1430.9	Not Found	High	High	Not Found	Not Found	Not Found	Not Found	Not Found	Not Found	Not Found	Not Found	Not Found	Not Found	Not Found	Not Found	Not Found	Not Found	High	High	High	High	High	High	High	High	High	High	High	High	High	High	High	High	High	High	High	High
		High	DKLNNLVLFDK	3xTMT6plex [N-Term; K2; K11]	5.86273e-06	0	1	2	1	P62852	1	2006.23	Not Found	Not Found	Not Found	Not Found	Not Found	Not Found	Not Found	Not Found	Not Found	Not Found	Not Found	Not Found	Not Found	Not Found	Not Found	High	Not Found	High	High	High	High	High	High	High	High	High	High	High	High	High	High	High	High	High	High	High	High
		High	LITPAVVSER	1xTMT6plex [N-Term]	0.00048381	9.38446e-05	1	2	8	P62852	0	1313.8	Not Found	Not Found	Not Found	Not Found	High	High	Not Found	Not Found	Not Found	Not Found	Not Found	Not Found	Not Found	Not Found	Not Found	Not Found	Not Found	High	High	High	High	High	High	High	High	High	High	High	High	High	High	High	High	High	High	High	High
		High	AALQELLSK	1xTMT6plex [N-Term]	0.0114956	0.00114322	1	2	2	P62852	0	1201.74	Not Found	Not Found	Not Found	Not Found	Not Found	Not Found	Not Found	Not Found	Not Found	Not Found	Not Found	Not Found	Not Found	Not Found	High	Not Found	Not Found	High	High	High	High	High	High	High	High	High	High	High	High	High	High	High	High	High	High	High	High
		High	DKLNNLVLFDK	1xDeamidated [N4]; 3xTMT6plex [N-Term; K2; K11]	0.0155662	0.00147617	1	2	1	P62852	1	2007.21	Not Found	High	Not Found	Not Found	Not Found	Not Found	Not Found	Not Found	Not Found	Not Found	Not Found	Not Found	Not Found	Not Found	Not Found	Not Found	Not Found	High	High	High	High	High	High	High	High	High	High	High	High	High	High	High	High	High	High	High	High
		High	DKLNNLVLFDK	2xTMT6plex [K11; K/D]	0.0331222	0.003008	1	2	2	P62852	1	1777.06	Not Found	Not Found	Not Found	High	Not Found	Not Found	Not Found	Not Found	Not Found	Not Found	Not Found	Not Found	Not Found	Not Found	Not Found	Not Found	Not Found	High	High	High	High	High	High	High	High	High	High	High	High	High	High	High	High	High	High	High	High
High	Master Protein	Q80XK6	Autophagy-related protein 2 homolog B OS=Mus musculus OX=10090 GN=Atg2b PE=1 SV=3	0	8.57463	1.20482	2	3	2	1	2075	231.253	5.88	Not Found	Not Found	Not Found	Not Found	Not Found	Not Found	Not Found	Not Found	Not Found	Not Found	Not Found	High	Not Found	Not Found	Not Found	Not Found	High	High	High	High	High	High	High	High	High	High	High	High	High	High	High	High	High	High	High	High
Checked	Protein Group ID	# Proteins	# Unique Peptides	# Peptides	# PSMs	Group Description	Mouse_Cell_661W_TMT_1_HpH_Fract_1.raw	Mouse_Cell_661W_TMT_1_HpH_Fract_10.raw	Mouse_Cell_661W_TMT_1_HpH_Fract_11.raw	Mouse_Cell_661W_TMT_1_HpH_Fract_12.raw	Mouse_Cell_661W_TMT_1_HpH_Fract_13.raw	Mouse_Cell_661W_TMT_1_HpH_Fract_14.raw	Mouse_Cell_661W_TMT_1_HpH_Fract_15.raw	Mouse_Cell_661W_TMT_1_HpH_Fract_16.raw	Mouse_Cell_661W_TMT_1_HpH_Fract_17.raw	Mouse_Cell_661W_TMT_1_HpH_Fract_2.raw	Mouse_Cell_661W_TMT_1_HpH_Fract_3.raw	Mouse_Cell_661W_TMT_1_HpH_Fract_4.raw	Mouse_Cell_661W_TMT_1_HpH_Fract_5.raw	Mouse_Cell_661W_TMT_1_HpH_Fract_6.raw	Mouse_Cell_661W_TMT_1_HpH_Fract_7.raw	Mouse_Cell_661W_TMT_1_HpH_Fract_8.raw	Mouse_Cell_661W_TMT_1_HpH_Fract_9.raw	Found in Sample: [S1] F1: 126, Control	Found in Sample: [S2] F1: 127N, Sample	Found in Sample: [S3] F1: 127C, Sample	Found in Sample: [S4] F1: 128N, Sample	Found in Sample: [S5] F1: 128C, Sample	Found in Sample: [S6] F1: 129N, Sample	Found in Sample: [S7] F1: 129C, Sample	Found in Sample: [S8] F1: 130N, Sample	Found in Sample: [S9] F1: 130C, Sample	Found in Sample: [S10] F1: 131, Sample	Found in Sample Group: F1, 126	Found in Sample Group: F1, 127N	Found in Sample Group: F1, 127C	Found in Sample Group: F1, 128N	Found in Sample Group: F1, 128C	Found in Sample Group: F1, 129N	Found in Sample Group: F1, 129C	Found in Sample Group: F1, 130N	Found in Sample Group: F1, 130C	Found in Sample Group: F1, 131
	3662	2	2	2	3	[Master Protein] Autophagy-related protein 2 homolog B OS=Mus musculus OX=10090 GN=Atg2b PE=1 SV=3	Not Found	Not Found	Not Found	Not Found	Not Found	Not Found	Not Found	Not Found	Not Found	Not Found	Not Found	High	Not Found	Not Found	Not Found	Not Found	High	High	High	High	High	High	High	High	High	High	High	High	High	High	High	High	High	High	High	High	High
	Checked	Confidence	Sequence	Modifications	Qvality PEP	Qvality q-value	# Protein Groups	# Proteins	# PSMs	Master Protein Accessions	# Missed Cleavages	Theo. MH+ [Da]	Mouse_Cell_661W_TMT_1_HpH_Fract_1.raw	Mouse_Cell_661W_TMT_1_HpH_Fract_10.raw	Mouse_Cell_661W_TMT_1_HpH_Fract_11.raw	Mouse_Cell_661W_TMT_1_HpH_Fract_12.raw	Mouse_Cell_661W_TMT_1_HpH_Fract_13.raw	Mouse_Cell_661W_TMT_1_HpH_Fract_14.raw	Mouse_Cell_661W_TMT_1_HpH_Fract_15.raw	Mouse_Cell_661W_TMT_1_HpH_Fract_16.raw	Mouse_Cell_661W_TMT_1_HpH_Fract_17.raw	Mouse_Cell_661W_TMT_1_HpH_Fract_2.raw	Mouse_Cell_661W_TMT_1_HpH_Fract_3.raw	Mouse_Cell_661W_TMT_1_HpH_Fract_4.raw	Mouse_Cell_661W_TMT_1_HpH_Fract_5.raw	Mouse_Cell_661W_TMT_1_HpH_Fract_6.raw	Mouse_Cell_661W_TMT_1_HpH_Fract_7.raw	Mouse_Cell_661W_TMT_1_HpH_Fract_8.raw	Mouse_Cell_661W_TMT_1_HpH_Fract_9.raw	Found in Sample: [S1] F1: 126, Control	Found in Sample: [S2] F1: 127N, Sample	Found in Sample: [S3] F1: 127C, Sample	Found in Sample: [S4] F1: 128N, Sample	Found in Sample: [S5] F1: 128C, Sample	Found in Sample: [S6] F1: 129N, Sample	Found in Sample: [S7] F1: 129C, Sample	Found in Sample: [S8] F1: 130N, Sample	Found in Sample: [S9] F1: 130C, Sample	Found in Sample: [S10] F1: 131, Sample	Found in Sample Group: F1, 126	Found in Sample Group: F1, 127N	Found in Sample Group: F1, 127C	Found in Sample Group: F1, 128N	Found in Sample Group: F1, 128C	Found in Sample Group: F1, 129N	Found in Sample Group: F1, 129C	Found in Sample Group: F1, 130N	Found in Sample Group: F1, 130C	Found in Sample Group: F1, 131
		High	ETLHLEFTDLESK	2xTMT6plex [N-Term; K13]	0.00026723	3.26555e-05	1	1	1	Q80XK6	0	2020.1	Not Found	Not Found	Not Found	Not Found	Not Found	Not Found	Not Found	Not Found	Not Found	Not Found	Not Found	Not Found	Not Found	Not Found	Not Found	Not Found	High	High	High	High	High	High	High	High	High	High	High	High	High	High	High	High	High	High	High	High	High
		High	LNIDQDALFFLK	2xTMT6plex [N-Term; K12]	0.00332191	0.00040345	1	2	2	Q80XK6	0	1895.1	Not Found	Not Found	Not Found	Not Found	Not Found	Not Found	Not Found	Not Found	Not Found	Not Found	Not Found	High	Not Found	Not Found	Not Found	Not Found	Not Found	High	High	High	High	High	High	High	High	High	High	High	High	High	High	High	High	High	High	High	High
High	Master Protein	Q9WTZ2	Membrane-bound transcription factor site-1 protease OS=Mus musculus OX=10090 GN=Mbtps1 PE=1 SV=1	0.00152012	5.15676	2.6616	2	3	2	1	1052	117.383	8.76	Not Found	Not Found	High	Not Found	Not Found	Not Found	Not Found	Not Found	Not Found	Not Found	Not Found	Not Found	Not Found	Not Found	Not Found	High	Not Found	High	High	High	High	High	High	High	High	High	High	High	High	High	High	High	High	High	High	High
Checked	Protein Group ID	# Proteins	# Unique Peptides	# Peptides	# PSMs	Group Description	Mouse_Cell_661W_TMT_1_HpH_Fract_1.raw	Mouse_Cell_661W_TMT_1_HpH_Fract_10.raw	Mouse_Cell_661W_TMT_1_HpH_Fract_11.raw	Mouse_Cell_661W_TMT_1_HpH_Fract_12.raw	Mouse_Cell_661W_TMT_1_HpH_Fract_13.raw	Mouse_Cell_661W_TMT_1_HpH_Fract_14.raw	Mouse_Cell_661W_TMT_1_HpH_Fract_15.raw	Mouse_Cell_661W_TMT_1_HpH_Fract_16.raw	Mouse_Cell_661W_TMT_1_HpH_Fract_17.raw	Mouse_Cell_661W_TMT_1_HpH_Fract_2.raw	Mouse_Cell_661W_TMT_1_HpH_Fract_3.raw	Mouse_Cell_661W_TMT_1_HpH_Fract_4.raw	Mouse_Cell_661W_TMT_1_HpH_Fract_5.raw	Mouse_Cell_661W_TMT_1_HpH_Fract_6.raw	Mouse_Cell_661W_TMT_1_HpH_Fract_7.raw	Mouse_Cell_661W_TMT_1_HpH_Fract_8.raw	Mouse_Cell_661W_TMT_1_HpH_Fract_9.raw	Found in Sample: [S1] F1: 126, Control	Found in Sample: [S2] F1: 127N, Sample	Found in Sample: [S3] F1: 127C, Sample	Found in Sample: [S4] F1: 128N, Sample	Found in Sample: [S5] F1: 128C, Sample	Found in Sample: [S6] F1: 129N, Sample	Found in Sample: [S7] F1: 129C, Sample	Found in Sample: [S8] F1: 130N, Sample	Found in Sample: [S9] F1: 130C, Sample	Found in Sample: [S10] F1: 131, Sample	Found in Sample Group: F1, 126	Found in Sample Group: F1, 127N	Found in Sample Group: F1, 127C	Found in Sample Group: F1, 128N	Found in Sample Group: F1, 128C	Found in Sample Group: F1, 129N	Found in Sample Group: F1, 129C	Found in Sample Group: F1, 130N	Found in Sample Group: F1, 130C	Found in Sample Group: F1, 131
	3661	1	2	2	3	[Master Protein] Membrane-bound transcription factor site-1 protease OS=Mus musculus OX=10090 GN=Mbtps1 PE=1 SV=1	Not Found	Not Found	High	Not Found	Not Found	Not Found	Not Found	Not Found	Not Found	Not Found	Not Found	Not Found	Not Found	Not Found	Not Found	High	Not Found	High	High	High	High	High	High	High	High	High	High	High	High	High	High	High	High	High	High	High	High
	Checked	Confidence	Sequence	Modifications	Qvality PEP	Qvality q-value	# Protein Groups	# Proteins	# PSMs	Master Protein Accessions	# Missed Cleavages	Theo. MH+ [Da]	Mouse_Cell_661W_TMT_1_HpH_Fract_1.raw	Mouse_Cell_661W_TMT_1_HpH_Fract_10.raw	Mouse_Cell_661W_TMT_1_HpH_Fract_11.raw	Mouse_Cell_661W_TMT_1_HpH_Fract_12.raw	Mouse_Cell_661W_TMT_1_HpH_Fract_13.raw	Mouse_Cell_661W_TMT_1_HpH_Fract_14.raw	Mouse_Cell_661W_TMT_1_HpH_Fract_15.raw	Mouse_Cell_661W_TMT_1_HpH_Fract_16.raw	Mouse_Cell_661W_TMT_1_HpH_Fract_17.raw	Mouse_Cell_661W_TMT_1_HpH_Fract_2.raw	Mouse_Cell_661W_TMT_1_HpH_Fract_3.raw	Mouse_Cell_661W_TMT_1_HpH_Fract_4.raw	Mouse_Cell_661W_TMT_1_HpH_Fract_5.raw	Mouse_Cell_661W_TMT_1_HpH_Fract_6.raw	Mouse_Cell_661W_TMT_1_HpH_Fract_7.raw	Mouse_Cell_661W_TMT_1_HpH_Fract_8.raw	Mouse_Cell_661W_TMT_1_HpH_Fract_9.raw	Found in Sample: [S1] F1: 126, Control	Found in Sample: [S2] F1: 127N, Sample	Found in Sample: [S3] F1: 127C, Sample	Found in Sample: [S4] F1: 128N, Sample	Found in Sample: [S5] F1: 128C, Sample	Found in Sample: [S6] F1: 129N, Sample	Found in Sample: [S7] F1: 129C, Sample	Found in Sample: [S8] F1: 130N, Sample	Found in Sample: [S9] F1: 130C, Sample	Found in Sample: [S10] F1: 131, Sample	Found in Sample Group: F1, 126	Found in Sample Group: F1, 127N	Found in Sample Group: F1, 127C	Found in Sample Group: F1, 128N	Found in Sample Group: F1, 128C	Found in Sample Group: F1, 129N	Found in Sample Group: F1, 129C	Found in Sample Group: F1, 130N	Found in Sample Group: F1, 130C	Found in Sample Group: F1, 131
		High	IVLYGDSNCLDDSHR	1xDeamidated [N8]; 1xCarbamidomethyl [C9]; 1xTMT6plex [N-Term]	0.00118793	0.000215237	1	1	2	Q9WTZ2	0	1993.95	Not Found	Not Found	Not Found	Not Found	Not Found	Not Found	Not Found	Not Found	Not Found	Not Found	Not Found	Not Found	Not Found	Not Found	Not Found	High	Not Found	High	High	High	High	High	High	High	High	High	High	High	High	High	High	High	High	High	High	High	High
		High	FPEDGVVITQTFK	1xDeamidated [Q10]; 2xTMT6plex [N-Term; K13]	0.0158059	0.00151395	1	1	1	Q9WTZ2	0	1940.08	Not Found	Not Found	High	Not Found	Not Found	Not Found	Not Found	Not Found	Not Found	Not Found	Not Found	Not Found	Not Found	Not Found	Not Found	Not Found	Not Found	High	High	High	High	High	High	High	High	High	High	High	High	High	High	High	High	High	High	High	High
High	Master Protein	Q6P8X1	Sorting nexin-6 OS=Mus musculus OX=10090 GN=Snx6 PE=1 SV=2	0	50.0495	26.601	11	33	11	1	406	46.62	6.16	High	High	Not Found	Not Found	Not Found	High	Not Found	Not Found	High	Not Found	High	High	High	High	High	High	Not Found	High	High	High	High	High	High	High	High	High	High	High	High	High	High	High	High	High	High	High
Checked	Protein Group ID	# Proteins	# Unique Peptides	# Peptides	# PSMs	Group Description	Mouse_Cell_661W_TMT_1_HpH_Fract_1.raw	Mouse_Cell_661W_TMT_1_HpH_Fract_10.raw	Mouse_Cell_661W_TMT_1_HpH_Fract_11.raw	Mouse_Cell_661W_TMT_1_HpH_Fract_12.raw	Mouse_Cell_661W_TMT_1_HpH_Fract_13.raw	Mouse_Cell_661W_TMT_1_HpH_Fract_14.raw	Mouse_Cell_661W_TMT_1_HpH_Fract_15.raw	Mouse_Cell_661W_TMT_1_HpH_Fract_16.raw	Mouse_Cell_661W_TMT_1_HpH_Fract_17.raw	Mouse_Cell_661W_TMT_1_HpH_Fract_2.raw	Mouse_Cell_661W_TMT_1_HpH_Fract_3.raw	Mouse_Cell_661W_TMT_1_HpH_Fract_4.raw	Mouse_Cell_661W_TMT_1_HpH_Fract_5.raw	Mouse_Cell_661W_TMT_1_HpH_Fract_6.raw	Mouse_Cell_661W_TMT_1_HpH_Fract_7.raw	Mouse_Cell_661W_TMT_1_HpH_Fract_8.raw	Mouse_Cell_661W_TMT_1_HpH_Fract_9.raw	Found in Sample: [S1] F1: 126, Control	Found in Sample: [S2] F1: 127N, Sample	Found in Sample: [S3] F1: 127C, Sample	Found in Sample: [S4] F1: 128N, Sample	Found in Sample: [S5] F1: 128C, Sample	Found in Sample: [S6] F1: 129N, Sample	Found in Sample: [S7] F1: 129C, Sample	Found in Sample: [S8] F1: 130N, Sample	Found in Sample: [S9] F1: 130C, Sample	Found in Sample: [S10] F1: 131, Sample	Found in Sample Group: F1, 126	Found in Sample Group: F1, 127N	Found in Sample Group: F1, 127C	Found in Sample Group: F1, 128N	Found in Sample Group: F1, 128C	Found in Sample Group: F1, 129N	Found in Sample Group: F1, 129C	Found in Sample Group: F1, 130N	Found in Sample Group: F1, 130C	Found in Sample Group: F1, 131
	3660	4	11	11	33	[Master Protein] Sorting nexin-6 OS=Mus musculus OX=10090 GN=Snx6 PE=1 SV=2	High	High	Not Found	Not Found	Not Found	High	Not Found	Not Found	High	Not Found	High	High	High	High	High	High	Not Found	High	High	High	High	High	High	High	High	High	High	High	High	High	High	High	High	High	High	High	High
	Checked	Confidence	Sequence	Modifications	Qvality PEP	Qvality q-value	# Protein Groups	# Proteins	# PSMs	Master Protein Accessions	# Missed Cleavages	Theo. MH+ [Da]	Mouse_Cell_661W_TMT_1_HpH_Fract_1.raw	Mouse_Cell_661W_TMT_1_HpH_Fract_10.raw	Mouse_Cell_661W_TMT_1_HpH_Fract_11.raw	Mouse_Cell_661W_TMT_1_HpH_Fract_12.raw	Mouse_Cell_661W_TMT_1_HpH_Fract_13.raw	Mouse_Cell_661W_TMT_1_HpH_Fract_14.raw	Mouse_Cell_661W_TMT_1_HpH_Fract_15.raw	Mouse_Cell_661W_TMT_1_HpH_Fract_16.raw	Mouse_Cell_661W_TMT_1_HpH_Fract_17.raw	Mouse_Cell_661W_TMT_1_HpH_Fract_2.raw	Mouse_Cell_661W_TMT_1_HpH_Fract_3.raw	Mouse_Cell_661W_TMT_1_HpH_Fract_4.raw	Mouse_Cell_661W_TMT_1_HpH_Fract_5.raw	Mouse_Cell_661W_TMT_1_HpH_Fract_6.raw	Mouse_Cell_661W_TMT_1_HpH_Fract_7.raw	Mouse_Cell_661W_TMT_1_HpH_Fract_8.raw	Mouse_Cell_661W_TMT_1_HpH_Fract_9.raw	Found in Sample: [S1] F1: 126, Control	Found in Sample: [S2] F1: 127N, Sample	Found in Sample: [S3] F1: 127C, Sample	Found in Sample: [S4] F1: 128N, Sample	Found in Sample: [S5] F1: 128C, Sample	Found in Sample: [S6] F1: 129N, Sample	Found in Sample: [S7] F1: 129C, Sample	Found in Sample: [S8] F1: 130N, Sample	Found in Sample: [S9] F1: 130C, Sample	Found in Sample: [S10] F1: 131, Sample	Found in Sample Group: F1, 126	Found in Sample Group: F1, 127N	Found in Sample Group: F1, 127C	Found in Sample Group: F1, 128N	Found in Sample Group: F1, 128C	Found in Sample Group: F1, 129N	Found in Sample Group: F1, 129C	Found in Sample Group: F1, 130N	Found in Sample Group: F1, 130C	Found in Sample Group: F1, 131
		High	NLVELAELELK	2xTMT6plex [N-Term; K11]	1.49452e-06	0	1	2	5	Q6P8X1	0	1729.05	Not Found	Not Found	Not Found	Not Found	Not Found	Not Found	Not Found	Not Found	Not Found	Not Found	Not Found	High	High	Not Found	Not Found	Not Found	Not Found	High	High	High	High	High	High	High	High	High	High	High	High	High	High	High	High	High	High	High	High
		High	SADGVIVSGVK	2xTMT6plex [N-Term; K11]	7.12643e-06	0	1	2	4	Q6P8X1	0	1489.9	Not Found	Not Found	Not Found	Not Found	Not Found	Not Found	Not Found	Not Found	Not Found	Not Found	Not Found	Not Found	Not Found	Not Found	High	High	Not Found	High	High	High	High	High	High	High	High	High	High	High	High	High	High	High	High	High	High	High	High
		High	MEGLDDGPDFLSEEDR	1xAcetyl [N-Term]	3.70134e-05	0	1	1	2	Q6P8X1	0	1866.77	Not Found	Not Found	Not Found	Not Found	Not Found	Not Found	Not Found	Not Found	High	Not Found	Not Found	Not Found	Not Found	Not Found	Not Found	Not Found	Not Found	Not Found	High	High	Not Found	Not Found	High	Not Found	High	High	High	Not Found	High	High	Not Found	Not Found	High	Not Found	High	High	High
		High	QELEAEYLAIFK	2xTMT6plex [N-Term; K12]	1.71117e-07	0	1	3	2	Q6P8X1	0	1912.08	Not Found	Not Found	Not Found	Not Found	Not Found	Not Found	Not Found	Not Found	Not Found	Not Found	High	Not Found	Not Found	Not Found	Not Found	Not Found	Not Found	High	High	High	High	High	High	High	High	High	High	High	High	High	High	High	High	High	High	High	High
		High	VSADEDLK	2xTMT6plex [N-Term; K8]	0.000235258	3.26555e-05	1	2	1	Q6P8X1	0	1334.76	Not Found	Not Found	Not Found	Not Found	Not Found	High	Not Found	Not Found	Not Found	Not Found	Not Found	Not Found	Not Found	Not Found	Not Found	Not Found	Not Found	High	High	High	High	High	High	High	High	High	High	High	High	High	High	High	High	High	High	High	High
		High	DVDDFFEHER	1xTMT6plex [N-Term]	0.000957642	0.000139833	1	2	4	Q6P8X1	0	1537.71	Not Found	Not Found	Not Found	Not Found	Not Found	Not Found	Not Found	Not Found	Not Found	Not Found	Not Found	Not Found	Not Found	High	Not Found	Not Found	Not Found	High	High	High	High	High	High	High	High	High	High	High	High	High	High	High	High	High	High	High	High
		High	TFLLEYHNR	1xTMT6plex [N-Term]	0.00257327	0.000392305	1	2	6	Q6P8X1	0	1421.77	Not Found	Not Found	Not Found	Not Found	Not Found	Not Found	Not Found	Not Found	Not Found	Not Found	Not Found	Not Found	Not Found	High	Not Found	Not Found	Not Found	High	High	High	High	High	High	High	High	High	High	High	High	High	High	High	High	High	High	High	High
		High	QELEAEYLAIFK	1xTMT6plex [Q/K]	0.00415248	0.000417981	1	3	3	Q6P8X1	0	1682.92	High	Not Found	Not Found	Not Found	Not Found	Not Found	Not Found	Not Found	Not Found	Not Found	Not Found	Not Found	Not Found	Not Found	Not Found	High	Not Found	High	High	High	High	High	High	High	High	High	High	High	High	High	High	High	High	High	High	High	High
		High	VAAHPILR	1xTMT6plex [N-Term]	0.012395	0.00127462	1	2	2	Q6P8X1	0	1105.7	Not Found	High	Not Found	Not Found	Not Found	Not Found	Not Found	Not Found	Not Found	Not Found	Not Found	Not Found	Not Found	Not Found	Not Found	Not Found	Not Found	High	High	High	High	High	High	High	High	High	High	High	High	High	High	High	High	High	High	High	High
		High	QELIDFK	2xTMT6plex [N-Term; K7]	0.0582074	0.00512825	1	2	1	Q6P8X1	0	1350.8	Not Found	Not Found	Not Found	Not Found	Not Found	Not Found	Not Found	Not Found	Not Found	Not Found	High	Not Found	Not Found	Not Found	Not Found	Not Found	Not Found	High	High	High	High	High	High	High	High	High	High	High	High	High	High	High	High	High	High	High	High
		High	QNEFSVVR	1xTMT6plex [N-Term]	0.0849225	0.00710466	1	2	2	Q6P8X1	0	1207.66	Not Found	Not Found	Not Found	Not Found	Not Found	High	Not Found	Not Found	Not Found	Not Found	Not Found	Not Found	Not Found	Not Found	Not Found	Not Found	Not Found	High	High	High	High	High	High	High	High	High	High	High	High	High	High	High	High	High	High	High	High
		High	SAADDYNR	1xTMT6plex [N-Term]	0.0856226	0.00714981	1	2	1	Q6P8X1	0	1140.55	Not Found	Not Found	Not Found	Not Found	Not Found	Not Found	Not Found	Not Found	Not Found	Not Found	Not Found	Not Found	Not Found	High	Not Found	Not Found	Not Found	High	High	High	High	High	High	High	High	High	High	High	High	High	High	High	High	High	High	High	High
High	Master Protein	Q3UIR3	E3 ubiquitin-protein ligase DTX3L OS=Mus musculus OX=10090 GN=Dtx3l PE=1 SV=1	0	8.57459	4.67914	2	3	2	1	748	82.991	8.09	Not Found	Not Found	Not Found	Not Found	Not Found	High	Not Found	Not Found	Not Found	Not Found	Not Found	Not Found	Not Found	Not Found	Not Found	High	High	High	High	High	High	High	High	High	High	High	High	High	High	High	High	High	High	High	High	High
Checked	Protein Group ID	# Proteins	# Unique Peptides	# Peptides	# PSMs	Group Description	Mouse_Cell_661W_TMT_1_HpH_Fract_1.raw	Mouse_Cell_661W_TMT_1_HpH_Fract_10.raw	Mouse_Cell_661W_TMT_1_HpH_Fract_11.raw	Mouse_Cell_661W_TMT_1_HpH_Fract_12.raw	Mouse_Cell_661W_TMT_1_HpH_Fract_13.raw	Mouse_Cell_661W_TMT_1_HpH_Fract_14.raw	Mouse_Cell_661W_TMT_1_HpH_Fract_15.raw	Mouse_Cell_661W_TMT_1_HpH_Fract_16.raw	Mouse_Cell_661W_TMT_1_HpH_Fract_17.raw	Mouse_Cell_661W_TMT_1_HpH_Fract_2.raw	Mouse_Cell_661W_TMT_1_HpH_Fract_3.raw	Mouse_Cell_661W_TMT_1_HpH_Fract_4.raw	Mouse_Cell_661W_TMT_1_HpH_Fract_5.raw	Mouse_Cell_661W_TMT_1_HpH_Fract_6.raw	Mouse_Cell_661W_TMT_1_HpH_Fract_7.raw	Mouse_Cell_661W_TMT_1_HpH_Fract_8.raw	Mouse_Cell_661W_TMT_1_HpH_Fract_9.raw	Found in Sample: [S1] F1: 126, Control	Found in Sample: [S2] F1: 127N, Sample	Found in Sample: [S3] F1: 127C, Sample	Found in Sample: [S4] F1: 128N, Sample	Found in Sample: [S5] F1: 128C, Sample	Found in Sample: [S6] F1: 129N, Sample	Found in Sample: [S7] F1: 129C, Sample	Found in Sample: [S8] F1: 130N, Sample	Found in Sample: [S9] F1: 130C, Sample	Found in Sample: [S10] F1: 131, Sample	Found in Sample Group: F1, 126	Found in Sample Group: F1, 127N	Found in Sample Group: F1, 127C	Found in Sample Group: F1, 128N	Found in Sample Group: F1, 128C	Found in Sample Group: F1, 129N	Found in Sample Group: F1, 129C	Found in Sample Group: F1, 130N	Found in Sample Group: F1, 130C	Found in Sample Group: F1, 131
	3659	2	2	2	3	[Master Protein] E3 ubiquitin-protein ligase DTX3L OS=Mus musculus OX=10090 GN=Dtx3l PE=1 SV=1	Not Found	Not Found	Not Found	Not Found	Not Found	High	Not Found	Not Found	Not Found	Not Found	Not Found	Not Found	Not Found	Not Found	Not Found	High	High	High	High	High	High	High	High	High	High	High	High	High	High	High	High	High	High	High	High	High	High
	Checked	Confidence	Sequence	Modifications	Qvality PEP	Qvality q-value	# Protein Groups	# Proteins	# PSMs	Master Protein Accessions	# Missed Cleavages	Theo. MH+ [Da]	Mouse_Cell_661W_TMT_1_HpH_Fract_1.raw	Mouse_Cell_661W_TMT_1_HpH_Fract_10.raw	Mouse_Cell_661W_TMT_1_HpH_Fract_11.raw	Mouse_Cell_661W_TMT_1_HpH_Fract_12.raw	Mouse_Cell_661W_TMT_1_HpH_Fract_13.raw	Mouse_Cell_661W_TMT_1_HpH_Fract_14.raw	Mouse_Cell_661W_TMT_1_HpH_Fract_15.raw	Mouse_Cell_661W_TMT_1_HpH_Fract_16.raw	Mouse_Cell_661W_TMT_1_HpH_Fract_17.raw	Mouse_Cell_661W_TMT_1_HpH_Fract_2.raw	Mouse_Cell_661W_TMT_1_HpH_Fract_3.raw	Mouse_Cell_661W_TMT_1_HpH_Fract_4.raw	Mouse_Cell_661W_TMT_1_HpH_Fract_5.raw	Mouse_Cell_661W_TMT_1_HpH_Fract_6.raw	Mouse_Cell_661W_TMT_1_HpH_Fract_7.raw	Mouse_Cell_661W_TMT_1_HpH_Fract_8.raw	Mouse_Cell_661W_TMT_1_HpH_Fract_9.raw	Found in Sample: [S1] F1: 126, Control	Found in Sample: [S2] F1: 127N, Sample	Found in Sample: [S3] F1: 127C, Sample	Found in Sample: [S4] F1: 128N, Sample	Found in Sample: [S5] F1: 128C, Sample	Found in Sample: [S6] F1: 129N, Sample	Found in Sample: [S7] F1: 129C, Sample	Found in Sample: [S8] F1: 130N, Sample	Found in Sample: [S9] F1: 130C, Sample	Found in Sample: [S10] F1: 131, Sample	Found in Sample Group: F1, 126	Found in Sample Group: F1, 127N	Found in Sample Group: F1, 127C	Found in Sample Group: F1, 128N	Found in Sample Group: F1, 128C	Found in Sample Group: F1, 129N	Found in Sample Group: F1, 129C	Found in Sample Group: F1, 130N	Found in Sample Group: F1, 130C	Found in Sample Group: F1, 131
		High	LLEPELLQEISEIEQK	2xTMT6plex [N-Term; K16]	1.36278e-05	0	1	2	2	Q3UIR3	0	2369.36	Not Found	Not Found	Not Found	Not Found	Not Found	Not Found	Not Found	Not Found	Not Found	Not Found	Not Found	Not Found	Not Found	Not Found	Not Found	High	High	High	High	High	High	High	High	High	High	High	High	High	High	High	High	High	High	High	High	High	High
		High	EPPDQSSIQVPVLLLEYFK	2xTMT6plex [N-Term; K19]	0.000363327	3.26555e-05	1	2	1	Q3UIR3	0	2660.5	Not Found	Not Found	Not Found	Not Found	Not Found	High	Not Found	Not Found	Not Found	Not Found	Not Found	Not Found	Not Found	Not Found	Not Found	Not Found	Not Found	High	High	High	High	High	High	High	High	High	High	High	High	High	High	High	High	High	High	High	High
High	Master Protein	Q3UUI3	Acyl-coenzyme A thioesterase THEM4 OS=Mus musculus OX=10090 GN=Them4 PE=1 SV=1	0.00842048	2.80883	5.65217	1	1	1	1	230	26.015	9.64	Not Found	Not Found	Not Found	Not Found	High	Not Found	Not Found	Not Found	Not Found	Not Found	Not Found	Not Found	Not Found	Not Found	Not Found	Not Found	Not Found	High	High	High	High	High	High	High	High	High	High	High	High	High	High	High	High	High	High	High
Checked	Protein Group ID	# Proteins	# Unique Peptides	# Peptides	# PSMs	Group Description	Mouse_Cell_661W_TMT_1_HpH_Fract_1.raw	Mouse_Cell_661W_TMT_1_HpH_Fract_10.raw	Mouse_Cell_661W_TMT_1_HpH_Fract_11.raw	Mouse_Cell_661W_TMT_1_HpH_Fract_12.raw	Mouse_Cell_661W_TMT_1_HpH_Fract_13.raw	Mouse_Cell_661W_TMT_1_HpH_Fract_14.raw	Mouse_Cell_661W_TMT_1_HpH_Fract_15.raw	Mouse_Cell_661W_TMT_1_HpH_Fract_16.raw	Mouse_Cell_661W_TMT_1_HpH_Fract_17.raw	Mouse_Cell_661W_TMT_1_HpH_Fract_2.raw	Mouse_Cell_661W_TMT_1_HpH_Fract_3.raw	Mouse_Cell_661W_TMT_1_HpH_Fract_4.raw	Mouse_Cell_661W_TMT_1_HpH_Fract_5.raw	Mouse_Cell_661W_TMT_1_HpH_Fract_6.raw	Mouse_Cell_661W_TMT_1_HpH_Fract_7.raw	Mouse_Cell_661W_TMT_1_HpH_Fract_8.raw	Mouse_Cell_661W_TMT_1_HpH_Fract_9.raw	Found in Sample: [S1] F1: 126, Control	Found in Sample: [S2] F1: 127N, Sample	Found in Sample: [S3] F1: 127C, Sample	Found in Sample: [S4] F1: 128N, Sample	Found in Sample: [S5] F1: 128C, Sample	Found in Sample: [S6] F1: 129N, Sample	Found in Sample: [S7] F1: 129C, Sample	Found in Sample: [S8] F1: 130N, Sample	Found in Sample: [S9] F1: 130C, Sample	Found in Sample: [S10] F1: 131, Sample	Found in Sample Group: F1, 126	Found in Sample Group: F1, 127N	Found in Sample Group: F1, 127C	Found in Sample Group: F1, 128N	Found in Sample Group: F1, 128C	Found in Sample Group: F1, 129N	Found in Sample Group: F1, 129C	Found in Sample Group: F1, 130N	Found in Sample Group: F1, 130C	Found in Sample Group: F1, 131
	3658	1	1	1	1	[Master Protein] Acyl-coenzyme A thioesterase THEM4 OS=Mus musculus OX=10090 GN=Them4 PE=1 SV=1	Not Found	Not Found	Not Found	Not Found	High	Not Found	Not Found	Not Found	Not Found	Not Found	Not Found	Not Found	Not Found	Not Found	Not Found	Not Found	Not Found	High	High	High	High	High	High	High	High	High	High	High	High	High	High	High	High	High	High	High	High
	Checked	Confidence	Sequence	Modifications	Qvality PEP	Qvality q-value	# Protein Groups	# Proteins	# PSMs	Master Protein Accessions	# Missed Cleavages	Theo. MH+ [Da]	Mouse_Cell_661W_TMT_1_HpH_Fract_1.raw	Mouse_Cell_661W_TMT_1_HpH_Fract_10.raw	Mouse_Cell_661W_TMT_1_HpH_Fract_11.raw	Mouse_Cell_661W_TMT_1_HpH_Fract_12.raw	Mouse_Cell_661W_TMT_1_HpH_Fract_13.raw	Mouse_Cell_661W_TMT_1_HpH_Fract_14.raw	Mouse_Cell_661W_TMT_1_HpH_Fract_15.raw	Mouse_Cell_661W_TMT_1_HpH_Fract_16.raw	Mouse_Cell_661W_TMT_1_HpH_Fract_17.raw	Mouse_Cell_661W_TMT_1_HpH_Fract_2.raw	Mouse_Cell_661W_TMT_1_HpH_Fract_3.raw	Mouse_Cell_661W_TMT_1_HpH_Fract_4.raw	Mouse_Cell_661W_TMT_1_HpH_Fract_5.raw	Mouse_Cell_661W_TMT_1_HpH_Fract_6.raw	Mouse_Cell_661W_TMT_1_HpH_Fract_7.raw	Mouse_Cell_661W_TMT_1_HpH_Fract_8.raw	Mouse_Cell_661W_TMT_1_HpH_Fract_9.raw	Found in Sample: [S1] F1: 126, Control	Found in Sample: [S2] F1: 127N, Sample	Found in Sample: [S3] F1: 127C, Sample	Found in Sample: [S4] F1: 128N, Sample	Found in Sample: [S5] F1: 128C, Sample	Found in Sample: [S6] F1: 129N, Sample	Found in Sample: [S7] F1: 129C, Sample	Found in Sample: [S8] F1: 130N, Sample	Found in Sample: [S9] F1: 130C, Sample	Found in Sample: [S10] F1: 131, Sample	Found in Sample Group: F1, 126	Found in Sample Group: F1, 127N	Found in Sample Group: F1, 127C	Found in Sample Group: F1, 128N	Found in Sample Group: F1, 128C	Found in Sample Group: F1, 129N	Found in Sample Group: F1, 129C	Found in Sample Group: F1, 130N	Found in Sample Group: F1, 130C	Found in Sample Group: F1, 131
		High	AIQEFQTLFVDSK	1xDeamidated [Q6]; 2xTMT6plex [N-Term; K13]	0.00262348	0.000392305	1	1	1	Q3UUI3	0	1985.1	Not Found	Not Found	Not Found	Not Found	High	Not Found	Not Found	Not Found	Not Found	Not Found	Not Found	Not Found	Not Found	Not Found	Not Found	Not Found	Not Found	High	High	High	High	High	High	High	High	High	High	High	High	High	High	High	High	High	High	High	High
High	Master Protein	Q8BMF4	Dihydrolipoyllysine-residue acetyltransferase component of pyruvate dehydrogenase complex, mitochondrial OS=Mus musculus OX=10090 GN=Dlat PE=1 SV=2	0	68.342	19.7819	10	38	10	1	642	67.899	8.57	High	Not Found	Not Found	Not Found	High	High	Not Found	Not Found	Not Found	High	High	Not Found	High	High	Not Found	High	High	High	High	High	High	High	High	High	High	High	High	High	High	High	High	High	High	High	High	High
Checked	Protein Group ID	# Proteins	# Unique Peptides	# Peptides	# PSMs	Group Description	Mouse_Cell_661W_TMT_1_HpH_Fract_1.raw	Mouse_Cell_661W_TMT_1_HpH_Fract_10.raw	Mouse_Cell_661W_TMT_1_HpH_Fract_11.raw	Mouse_Cell_661W_TMT_1_HpH_Fract_12.raw	Mouse_Cell_661W_TMT_1_HpH_Fract_13.raw	Mouse_Cell_661W_TMT_1_HpH_Fract_14.raw	Mouse_Cell_661W_TMT_1_HpH_Fract_15.raw	Mouse_Cell_661W_TMT_1_HpH_Fract_16.raw	Mouse_Cell_661W_TMT_1_HpH_Fract_17.raw	Mouse_Cell_661W_TMT_1_HpH_Fract_2.raw	Mouse_Cell_661W_TMT_1_HpH_Fract_3.raw	Mouse_Cell_661W_TMT_1_HpH_Fract_4.raw	Mouse_Cell_661W_TMT_1_HpH_Fract_5.raw	Mouse_Cell_661W_TMT_1_HpH_Fract_6.raw	Mouse_Cell_661W_TMT_1_HpH_Fract_7.raw	Mouse_Cell_661W_TMT_1_HpH_Fract_8.raw	Mouse_Cell_661W_TMT_1_HpH_Fract_9.raw	Found in Sample: [S1] F1: 126, Control	Found in Sample: [S2] F1: 127N, Sample	Found in Sample: [S3] F1: 127C, Sample	Found in Sample: [S4] F1: 128N, Sample	Found in Sample: [S5] F1: 128C, Sample	Found in Sample: [S6] F1: 129N, Sample	Found in Sample: [S7] F1: 129C, Sample	Found in Sample: [S8] F1: 130N, Sample	Found in Sample: [S9] F1: 130C, Sample	Found in Sample: [S10] F1: 131, Sample	Found in Sample Group: F1, 126	Found in Sample Group: F1, 127N	Found in Sample Group: F1, 127C	Found in Sample Group: F1, 128N	Found in Sample Group: F1, 128C	Found in Sample Group: F1, 129N	Found in Sample Group: F1, 129C	Found in Sample Group: F1, 130N	Found in Sample Group: F1, 130C	Found in Sample Group: F1, 131
	3657	1	10	10	38	[Master Protein] Dihydrolipoyllysine-residue acetyltransferase component of pyruvate dehydrogenase complex, mitochondrial OS=Mus musculus OX=10090 GN=Dlat PE=1 SV=2	High	Not Found	Not Found	Not Found	High	High	Not Found	Not Found	Not Found	High	High	Not Found	High	High	Not Found	High	High	High	High	High	High	High	High	High	High	High	High	High	High	High	High	High	High	High	High	High	High
	Checked	Confidence	Sequence	Modifications	Qvality PEP	Qvality q-value	# Protein Groups	# Proteins	# PSMs	Master Protein Accessions	# Missed Cleavages	Theo. MH+ [Da]	Mouse_Cell_661W_TMT_1_HpH_Fract_1.raw	Mouse_Cell_661W_TMT_1_HpH_Fract_10.raw	Mouse_Cell_661W_TMT_1_HpH_Fract_11.raw	Mouse_Cell_661W_TMT_1_HpH_Fract_12.raw	Mouse_Cell_661W_TMT_1_HpH_Fract_13.raw	Mouse_Cell_661W_TMT_1_HpH_Fract_14.raw	Mouse_Cell_661W_TMT_1_HpH_Fract_15.raw	Mouse_Cell_661W_TMT_1_HpH_Fract_16.raw	Mouse_Cell_661W_TMT_1_HpH_Fract_17.raw	Mouse_Cell_661W_TMT_1_HpH_Fract_2.raw	Mouse_Cell_661W_TMT_1_HpH_Fract_3.raw	Mouse_Cell_661W_TMT_1_HpH_Fract_4.raw	Mouse_Cell_661W_TMT_1_HpH_Fract_5.raw	Mouse_Cell_661W_TMT_1_HpH_Fract_6.raw	Mouse_Cell_661W_TMT_1_HpH_Fract_7.raw	Mouse_Cell_661W_TMT_1_HpH_Fract_8.raw	Mouse_Cell_661W_TMT_1_HpH_Fract_9.raw	Found in Sample: [S1] F1: 126, Control	Found in Sample: [S2] F1: 127N, Sample	Found in Sample: [S3] F1: 127C, Sample	Found in Sample: [S4] F1: 128N, Sample	Found in Sample: [S5] F1: 128C, Sample	Found in Sample: [S6] F1: 129N, Sample	Found in Sample: [S7] F1: 129C, Sample	Found in Sample: [S8] F1: 130N, Sample	Found in Sample: [S9] F1: 130C, Sample	Found in Sample: [S10] F1: 131, Sample	Found in Sample Group: F1, 126	Found in Sample Group: F1, 127N	Found in Sample Group: F1, 127C	Found in Sample Group: F1, 128N	Found in Sample Group: F1, 128C	Found in Sample Group: F1, 129N	Found in Sample Group: F1, 129C	Found in Sample Group: F1, 130N	Found in Sample Group: F1, 130C	Found in Sample Group: F1, 131
		High	GLETIASDVVSLASK	2xTMT6plex [N-Term; K15]	3.89306e-08	0	1	1	5	Q8BMF4	0	1948.14	Not Found	Not Found	Not Found	Not Found	Not Found	Not Found	Not Found	Not Found	Not Found	High	High	Not Found	Not Found	Not Found	Not Found	Not Found	Not Found	High	High	High	High	High	High	High	High	High	High	High	High	High	High	High	High	High	High	High	High
		High	GLETIASDVVSLASK	1xTMT6plex [N-Term]	3.26481e-05	0	1	1	2	Q8BMF4	0	1718.97	Not Found	Not Found	Not Found	Not Found	High	Not Found	Not Found	Not Found	Not Found	Not Found	Not Found	Not Found	Not Found	Not Found	Not Found	Not Found	Not Found	High	High	High	High	High	High	High	High	High	High	High	High	High	High	High	High	High	High	High	High
		High	ISVNDFIIK	2xTMT6plex [N-Term; K9]	4.41166e-05	0	1	1	2	Q8BMF4	0	1506.93	Not Found	Not Found	Not Found	Not Found	Not Found	Not Found	Not Found	Not Found	Not Found	Not Found	Not Found	Not Found	Not Found	Not Found	Not Found	High	Not Found	High	High	High	High	High	High	High	High	High	High	High	High	High	High	High	High	High	High	High	High
		High	VPEANSSWMDTVIR	1xTMT6plex [N-Term]	2.78788e-08	0	1	1	2	Q8BMF4	0	1833.94	Not Found	Not Found	Not Found	Not Found	Not Found	Not Found	Not Found	Not Found	Not Found	Not Found	Not Found	Not Found	Not Found	Not Found	Not Found	High	Not Found	High	High	High	High	High	High	High	High	High	High	High	High	High	High	High	High	High	High	High	High
		High	VAPAPAGVFTDIPISNIR	1xTMT6plex [N-Term]	6.28407e-08	0	1	1	12	Q8BMF4	0	2067.18	Not Found	Not Found	Not Found	Not Found	Not Found	Not Found	Not Found	Not Found	Not Found	Not Found	Not Found	Not Found	Not Found	High	Not Found	Not Found	Not Found	High	High	High	High	High	High	High	High	High	High	High	High	High	High	High	High	High	High	High	High
		High	VVDGAVGAQWLAEFK	2xTMT6plex [N-Term; K15]	1.98434e-06	0	1	1	4	Q8BMF4	0	2048.16	High	Not Found	Not Found	Not Found	Not Found	Not Found	Not Found	Not Found	Not Found	Not Found	Not Found	Not Found	Not Found	Not Found	Not Found	Not Found	Not Found	High	High	High	High	High	High	High	High	High	High	High	High	High	High	High	High	High	High	High	High
		High	AAPAAAAAMAPPGPR	1xTMT6plex [N-Term]	0.00118081	0.000215237	1	1	2	Q8BMF4	0	1548.85	Not Found	Not Found	Not Found	Not Found	Not Found	Not Found	Not Found	Not Found	Not Found	Not Found	High	Not Found	Not Found	Not Found	Not Found	Not Found	Not Found	High	High	High	High	High	High	High	High	High	High	High	High	High	High	High	High	High	High	High	High
		High	GIDLTQVK	2xTMT6plex [N-Term; K8]	0.00291086	0.00040345	1	1	1	Q8BMF4	0	1331.83	Not Found	Not Found	Not Found	Not Found	Not Found	High	Not Found	Not Found	Not Found	Not Found	Not Found	Not Found	Not Found	Not Found	Not Found	Not Found	Not Found	High	High	High	High	High	High	High	High	High	High	High	High	High	High	High	High	High	High	High	High
		High	DIDSFVPSK	2xTMT6plex [N-Term; K9]	0.00418108	0.000417981	1	1	1	Q8BMF4	0	1465.83	Not Found	Not Found	Not Found	Not Found	Not Found	Not Found	Not Found	Not Found	Not Found	Not Found	Not Found	Not Found	High	Not Found	Not Found	Not Found	Not Found	High	High	High	High	High	High	High	High	High	High	High	High	High	High	High	High	High	High	High	High
		High	VPEANSSWMDTVIR	1xOxidation [M9]; 1xTMT6plex [N-Term]	0.0112395	0.00112456	1	1	2	Q8BMF4	0	1849.93	Not Found	Not Found	Not Found	Not Found	Not Found	Not Found	Not Found	Not Found	Not Found	Not Found	Not Found	Not Found	Not Found	Not Found	Not Found	High	Not Found	High	High	High	High	High	High	High	High	High	High	High	High	High	High	High	High	High	High	High	High
		High	VFVSPLAK	2xTMT6plex [N-Term; K8]	0.0152138	0.00147617	1	1	2	Q8BMF4	0	1318.85	Not Found	Not Found	Not Found	Not Found	High	Not Found	Not Found	Not Found	Not Found	Not Found	Not Found	Not Found	Not Found	Not Found	Not Found	Not Found	Not Found	High	High	High	High	High	High	High	High	High	High	High	High	High	High	High	High	High	High	High	High
		High	ILVPEGTR	1xTMT6plex [N-Term]	0.117508	0.00991808	1	1	3	Q8BMF4	0	1113.68	Not Found	Not Found	Not Found	Not Found	Not Found	Not Found	Not Found	Not Found	Not Found	Not Found	Not Found	Not Found	Not Found	Not Found	Not Found	Not Found	High	High	High	High	High	High	High	High	High	High	High	High	High	High	High	High	High	High	High	High	High
High	Master Protein	P60487	Pyridoxal phosphate phosphatase OS=Mus musculus OX=10090 GN=Pdxp PE=1 SV=1	0.0034789	3.90693	3.76712	1	2	1	1	292	31.492	5.74	Not Found	Not Found	Not Found	Not Found	Not Found	Not Found	Not Found	Not Found	Not Found	High	Not Found	Not Found	Not Found	Not Found	Not Found	Not Found	Not Found	High	High	High	High	High	High	High	High	High	High	High	High	High	High	High	High	High	High	High
Checked	Protein Group ID	# Proteins	# Unique Peptides	# Peptides	# PSMs	Group Description	Mouse_Cell_661W_TMT_1_HpH_Fract_1.raw	Mouse_Cell_661W_TMT_1_HpH_Fract_10.raw	Mouse_Cell_661W_TMT_1_HpH_Fract_11.raw	Mouse_Cell_661W_TMT_1_HpH_Fract_12.raw	Mouse_Cell_661W_TMT_1_HpH_Fract_13.raw	Mouse_Cell_661W_TMT_1_HpH_Fract_14.raw	Mouse_Cell_661W_TMT_1_HpH_Fract_15.raw	Mouse_Cell_661W_TMT_1_HpH_Fract_16.raw	Mouse_Cell_661W_TMT_1_HpH_Fract_17.raw	Mouse_Cell_661W_TMT_1_HpH_Fract_2.raw	Mouse_Cell_661W_TMT_1_HpH_Fract_3.raw	Mouse_Cell_661W_TMT_1_HpH_Fract_4.raw	Mouse_Cell_661W_TMT_1_HpH_Fract_5.raw	Mouse_Cell_661W_TMT_1_HpH_Fract_6.raw	Mouse_Cell_661W_TMT_1_HpH_Fract_7.raw	Mouse_Cell_661W_TMT_1_HpH_Fract_8.raw	Mouse_Cell_661W_TMT_1_HpH_Fract_9.raw	Found in Sample: [S1] F1: 126, Control	Found in Sample: [S2] F1: 127N, Sample	Found in Sample: [S3] F1: 127C, Sample	Found in Sample: [S4] F1: 128N, Sample	Found in Sample: [S5] F1: 128C, Sample	Found in Sample: [S6] F1: 129N, Sample	Found in Sample: [S7] F1: 129C, Sample	Found in Sample: [S8] F1: 130N, Sample	Found in Sample: [S9] F1: 130C, Sample	Found in Sample: [S10] F1: 131, Sample	Found in Sample Group: F1, 126	Found in Sample Group: F1, 127N	Found in Sample Group: F1, 127C	Found in Sample Group: F1, 128N	Found in Sample Group: F1, 128C	Found in Sample Group: F1, 129N	Found in Sample Group: F1, 129C	Found in Sample Group: F1, 130N	Found in Sample Group: F1, 130C	Found in Sample Group: F1, 131
	3656	1	1	1	2	[Master Protein] Pyridoxal phosphate phosphatase OS=Mus musculus OX=10090 GN=Pdxp PE=1 SV=1	Not Found	Not Found	Not Found	Not Found	Not Found	Not Found	Not Found	Not Found	Not Found	High	Not Found	Not Found	Not Found	Not Found	Not Found	Not Found	Not Found	High	High	High	High	High	High	High	High	High	High	High	High	High	High	High	High	High	High	High	High
	Checked	Confidence	Sequence	Modifications	Qvality PEP	Qvality q-value	# Protein Groups	# Proteins	# PSMs	Master Protein Accessions	# Missed Cleavages	Theo. MH+ [Da]	Mouse_Cell_661W_TMT_1_HpH_Fract_1.raw	Mouse_Cell_661W_TMT_1_HpH_Fract_10.raw	Mouse_Cell_661W_TMT_1_HpH_Fract_11.raw	Mouse_Cell_661W_TMT_1_HpH_Fract_12.raw	Mouse_Cell_661W_TMT_1_HpH_Fract_13.raw	Mouse_Cell_661W_TMT_1_HpH_Fract_14.raw	Mouse_Cell_661W_TMT_1_HpH_Fract_15.raw	Mouse_Cell_661W_TMT_1_HpH_Fract_16.raw	Mouse_Cell_661W_TMT_1_HpH_Fract_17.raw	Mouse_Cell_661W_TMT_1_HpH_Fract_2.raw	Mouse_Cell_661W_TMT_1_HpH_Fract_3.raw	Mouse_Cell_661W_TMT_1_HpH_Fract_4.raw	Mouse_Cell_661W_TMT_1_HpH_Fract_5.raw	Mouse_Cell_661W_TMT_1_HpH_Fract_6.raw	Mouse_Cell_661W_TMT_1_HpH_Fract_7.raw	Mouse_Cell_661W_TMT_1_HpH_Fract_8.raw	Mouse_Cell_661W_TMT_1_HpH_Fract_9.raw	Found in Sample: [S1] F1: 126, Control	Found in Sample: [S2] F1: 127N, Sample	Found in Sample: [S3] F1: 127C, Sample	Found in Sample: [S4] F1: 128N, Sample	Found in Sample: [S5] F1: 128C, Sample	Found in Sample: [S6] F1: 129N, Sample	Found in Sample: [S7] F1: 129C, Sample	Found in Sample: [S8] F1: 130N, Sample	Found in Sample: [S9] F1: 130C, Sample	Found in Sample: [S10] F1: 131, Sample	Found in Sample Group: F1, 126	Found in Sample Group: F1, 127N	Found in Sample Group: F1, 127C	Found in Sample Group: F1, 128N	Found in Sample Group: F1, 128C	Found in Sample Group: F1, 129N	Found in Sample Group: F1, 129C	Found in Sample Group: F1, 130N	Found in Sample Group: F1, 130C	Found in Sample Group: F1, 131
		High	IVPGAPELLQR	1xTMT6plex [N-Term]	0.000551346	0.000139833	1	1	2	P60487	0	1421.87	Not Found	Not Found	Not Found	Not Found	Not Found	Not Found	Not Found	Not Found	Not Found	High	Not Found	Not Found	Not Found	Not Found	Not Found	Not Found	Not Found	High	High	High	High	High	High	High	High	High	High	High	High	High	High	High	High	High	High	High	High
High	Master Protein	P68134	Actin, alpha skeletal muscle OS=Mus musculus OX=10090 GN=Acta1 PE=1 SV=1	0	312.498	67.374	19	827	1	1	377	42.024	5.39	High	High	High	High	High	High	High	High	High	High	High	High	High	High	High	High	High	High	High	High	High	High	High	High	High	High	High	High	High	High	High	High	High	High	High	High
Checked	Protein Group ID	# Proteins	# Unique Peptides	# Peptides	# PSMs	Group Description	Mouse_Cell_661W_TMT_1_HpH_Fract_1.raw	Mouse_Cell_661W_TMT_1_HpH_Fract_10.raw	Mouse_Cell_661W_TMT_1_HpH_Fract_11.raw	Mouse_Cell_661W_TMT_1_HpH_Fract_12.raw	Mouse_Cell_661W_TMT_1_HpH_Fract_13.raw	Mouse_Cell_661W_TMT_1_HpH_Fract_14.raw	Mouse_Cell_661W_TMT_1_HpH_Fract_15.raw	Mouse_Cell_661W_TMT_1_HpH_Fract_16.raw	Mouse_Cell_661W_TMT_1_HpH_Fract_17.raw	Mouse_Cell_661W_TMT_1_HpH_Fract_2.raw	Mouse_Cell_661W_TMT_1_HpH_Fract_3.raw	Mouse_Cell_661W_TMT_1_HpH_Fract_4.raw	Mouse_Cell_661W_TMT_1_HpH_Fract_5.raw	Mouse_Cell_661W_TMT_1_HpH_Fract_6.raw	Mouse_Cell_661W_TMT_1_HpH_Fract_7.raw	Mouse_Cell_661W_TMT_1_HpH_Fract_8.raw	Mouse_Cell_661W_TMT_1_HpH_Fract_9.raw	Found in Sample: [S1] F1: 126, Control	Found in Sample: [S2] F1: 127N, Sample	Found in Sample: [S3] F1: 127C, Sample	Found in Sample: [S4] F1: 128N, Sample	Found in Sample: [S5] F1: 128C, Sample	Found in Sample: [S6] F1: 129N, Sample	Found in Sample: [S7] F1: 129C, Sample	Found in Sample: [S8] F1: 130N, Sample	Found in Sample: [S9] F1: 130C, Sample	Found in Sample: [S10] F1: 131, Sample	Found in Sample Group: F1, 126	Found in Sample Group: F1, 127N	Found in Sample Group: F1, 127C	Found in Sample Group: F1, 128N	Found in Sample Group: F1, 128C	Found in Sample Group: F1, 129N	Found in Sample Group: F1, 129C	Found in Sample Group: F1, 130N	Found in Sample Group: F1, 130C	Found in Sample Group: F1, 131
	3653	6	1	19	827	[Master Protein] Actin, alpha skeletal muscle OS=Mus musculus OX=10090 GN=Acta1 PE=1 SV=1	High	High	High	High	High	High	High	High	High	High	High	High	High	High	High	High	High	High	High	High	High	High	High	High	High	High	High	High	High	High	High	High	High	High	High	High	High
	Checked	Confidence	Sequence	Modifications	Qvality PEP	Qvality q-value	# Protein Groups	# Proteins	# PSMs	Master Protein Accessions	# Missed Cleavages	Theo. MH+ [Da]	Mouse_Cell_661W_TMT_1_HpH_Fract_1.raw	Mouse_Cell_661W_TMT_1_HpH_Fract_10.raw	Mouse_Cell_661W_TMT_1_HpH_Fract_11.raw	Mouse_Cell_661W_TMT_1_HpH_Fract_12.raw	Mouse_Cell_661W_TMT_1_HpH_Fract_13.raw	Mouse_Cell_661W_TMT_1_HpH_Fract_14.raw	Mouse_Cell_661W_TMT_1_HpH_Fract_15.raw	Mouse_Cell_661W_TMT_1_HpH_Fract_16.raw	Mouse_Cell_661W_TMT_1_HpH_Fract_17.raw	Mouse_Cell_661W_TMT_1_HpH_Fract_2.raw	Mouse_Cell_661W_TMT_1_HpH_Fract_3.raw	Mouse_Cell_661W_TMT_1_HpH_Fract_4.raw	Mouse_Cell_661W_TMT_1_HpH_Fract_5.raw	Mouse_Cell_661W_TMT_1_HpH_Fract_6.raw	Mouse_Cell_661W_TMT_1_HpH_Fract_7.raw	Mouse_Cell_661W_TMT_1_HpH_Fract_8.raw	Mouse_Cell_661W_TMT_1_HpH_Fract_9.raw	Found in Sample: [S1] F1: 126, Control	Found in Sample: [S2] F1: 127N, Sample	Found in Sample: [S3] F1: 127C, Sample	Found in Sample: [S4] F1: 128N, Sample	Found in Sample: [S5] F1: 128C, Sample	Found in Sample: [S6] F1: 129N, Sample	Found in Sample: [S7] F1: 129C, Sample	Found in Sample: [S8] F1: 130N, Sample	Found in Sample: [S9] F1: 130C, Sample	Found in Sample: [S10] F1: 131, Sample	Found in Sample Group: F1, 126	Found in Sample Group: F1, 127N	Found in Sample Group: F1, 127C	Found in Sample Group: F1, 128N	Found in Sample Group: F1, 128C	Found in Sample Group: F1, 129N	Found in Sample Group: F1, 129C	Found in Sample Group: F1, 130N	Found in Sample Group: F1, 130C	Found in Sample Group: F1, 131
		High	DSYVGDEAQSK	2xTMT6plex [N-Term; K11]	2.60897e-09	0	4	14	50	P60710; P62737; P68134; P63260	0	1656.85	Not Found	Not Found	High	High	Not Found	Not Found	Not Found	Not Found	Not Found	Not Found	High	Not Found	Not Found	Not Found	Not Found	Not Found	Not Found	High	High	High	High	High	High	High	High	High	High	High	High	High	High	High	High	High	High	High	High
		High	DSYVGDEAQSK	1xTMT6plex [D/K]	4.22551e-06	0	4	14	65	P60710; P62737; P68134; P63260	0	1427.69	Not Found	Not Found	Not Found	Not Found	Not Found	Not Found	High	High	High	Not Found	Not Found	Not Found	Not Found	Not Found	Not Found	Not Found	Not Found	High	High	High	High	High	High	High	High	High	High	High	High	High	High	High	High	High	High	High	High
		High	QEYDEAGPSIVHR	1xTMT6plex [N-Term]	5.32356e-05	0	2	3	2	P62737; P68134	0	1729.87	Not Found	Not Found	Not Found	High	Not Found	Not Found	Not Found	Not Found	Not Found	Not Found	Not Found	Not Found	Not Found	Not Found	Not Found	Not Found	Not Found	High	High	High	High	High	High	High	High	High	High	High	High	High	High	High	High	High	High	High	High
		High	GYSFVTTAER	1xTMT6plex [N-Term]	7.83225e-06	0	2	6	4	P62737; P68134	0	1359.71	Not Found	Not Found	Not Found	Not Found	Not Found	Not Found	Not Found	Not Found	Not Found	Not Found	Not Found	Not Found	High	Not Found	Not Found	Not Found	Not Found	High	High	High	High	High	High	High	High	High	High	High	High	High	High	High	High	High	High	High	High
		High	VAPEEHPTLLTEAPLNPK	2xTMT6plex [N-Term; K18]	2.12671e-06	0	2	8	6	P62737; P68134	0	2414.37	High	Not Found	Not Found	Not Found	Not Found	Not Found	Not Found	Not Found	Not Found	High	High	Not Found	Not Found	High	Not Found	Not Found	Not Found	High	High	High	High	High	High	High	High	High	High	High	High	High	High	High	High	High	High	High	High
		High	VAPEEHPTLLTEAPLNPK	1xTMT6plex [V/K]	5.49277e-05	0	2	8	6	P62737; P68134	0	2185.21	Not Found	High	Not Found	Not Found	Not Found	Not Found	Not Found	Not Found	Not Found	Not Found	Not Found	Not Found	Not Found	High	Not Found	Not Found	Not Found	High	High	High	High	High	High	High	High	High	High	High	High	High	High	High	High	High	High	High	High
		High	YPIEHGIITNWDDMEK	2xTMT6plex [N-Term; K16]	1.63552e-05	0	2	7	44	P62737; P68134	0	2419.24	Not Found	Not Found	Not Found	Not Found	High	High	High	Not Found	Not Found	Not Found	Not Found	Not Found	Not Found	Not Found	Not Found	Not Found	Not Found	High	High	High	High	High	High	High	High	High	High	High	High	High	High	High	High	High	High	High	High
		High	EITALAPSTMK	2xTMT6plex [N-Term; K11]	1.26368e-05	0	4	9	12	P60710; P62737; P68134; P63260	0	1619.94	Not Found	Not Found	Not Found	Not Found	Not Found	High	Not Found	Not Found	Not Found	Not Found	Not Found	Not Found	Not Found	Not Found	Not Found	Not Found	Not Found	High	High	High	High	High	High	High	High	High	High	High	High	High	High	High	High	High	High	High	High
		High	SYELPDGQVITIGNER		1.49911e-07	0	5	10	12	Q8BFZ3; P60710; P62737; P68134; P63260	0	1790.89	Not Found	Not Found	Not Found	Not Found	High	Not Found	Not Found	Not Found	Not Found	Not Found	Not Found	Not Found	Not Found	Not Found	Not Found	Not Found	High	High	High	High	High	High	High	High	High	High	High	High	High	High	High	High	High	High	High	High	High
		High	SYELPDGQVITIGNER	1xDeamidated [N14]	0.000128921	0	5	10	2	Q8BFZ3; P60710; P62737; P68134; P63260	0	1791.88	Not Found	Not Found	Not Found	Not Found	Not Found	Not Found	Not Found	Not Found	Not Found	Not Found	Not Found	Not Found	Not Found	Not Found	Not Found	High	Not Found	High	High	High	High	High	High	High	High	High	High	High	High	High	High	High	High	High	High	High	High
		High	SYELPDGQVITIGNER	1xDeamidated [N/Q]; 1xTMT6plex [N-Term]	1.90461e-07	0	5	10	43	Q8BFZ3; P60710; P62737; P68134; P63260	0	2021.04	Not Found	High	High	High	Not Found	Not Found	Not Found	Not Found	Not Found	Not Found	Not Found	Not Found	High	High	Not Found	Not Found	High	High	High	High	High	High	High	High	High	High	High	High	High	High	High	High	High	High	High	High	High
		High	SYELPDGQVITIGNER	1xTMT6plex [N-Term]	4.95916e-11	0	5	10	139	Q8BFZ3; P60710; P62737; P68134; P63260	0	2020.05	Not Found	High	High	High	Not Found	Not Found	Not Found	Not Found	High	Not Found	Not Found	Not Found	Not Found	Not Found	Not Found	Not Found	Not Found	High	High	High	High	High	High	High	High	High	High	High	High	High	High	High	High	High	High	High	High
		High	LCYVALDFENEMATAASSSSLEK	1xOxidation [M12]; 1xCarbamidomethyl [C2]; 1xTMT6plex [K/L]	3.00682e-08	0	2	5	3	P62737; P68134	0	2781.32	Not Found	High	Not Found	Not Found	Not Found	Not Found	Not Found	Not Found	Not Found	High	Not Found	Not Found	Not Found	Not Found	Not Found	Not Found	Not Found	High	High	High	High	High	High	High	High	High	High	High	High	High	High	High	High	High	High	High	High
		High	LCYVALDFENEMATAASSSSLEK	1xCarbamidomethyl [C2]; 2xTMT6plex [N-Term; K23]	3.17274e-07	0	2	5	2	P62737; P68134	0	2994.48	Not Found	Not Found	Not Found	Not Found	Not Found	Not Found	Not Found	Not Found	Not Found	Not Found	Not Found	High	High	Not Found	Not Found	Not Found	Not Found	High	High	High	High	High	High	High	High	High	High	High	High	High	High	High	High	High	High	High	High
		High	LCYVALDFENEMATAASSSSLEK	1xDeamidated [N10]; 1xCarbamidomethyl [C2]; 2xTMT6plex [N-Term; K23]	2.67462e-11	0	2	5	2	P62737; P68134	0	2995.47	Not Found	Not Found	Not Found	Not Found	Not Found	Not Found	Not Found	Not Found	Not Found	Not Found	Not Found	High	High	Not Found	Not Found	Not Found	Not Found	High	High	High	High	High	High	High	High	High	High	High	High	High	High	High	High	High	High	High	High
		High	LCYVALDFENEMATAASSSSLEK	1xOxidation [M12]; 1xCarbamidomethyl [C2]; 2xTMT6plex [N-Term; K23]	3.2322e-09	0	2	5	7	P62737; P68134	0	3010.48	High	Not Found	Not Found	Not Found	Not Found	Not Found	Not Found	Not Found	Not Found	Not Found	Not Found	High	High	High	High	Not Found	Not Found	High	High	High	High	High	High	High	High	High	High	High	High	High	High	High	High	High	High	High	High
		High	LCYVALDFENEMATAASSSSLEK	1xOxidation [M12]; 1xDeamidated [N10]; 1xCarbamidomethyl [C2]; 2xTMT6plex [N-Term; K23]	1.36346e-09	0	2	5	5	P62737; P68134	0	3011.46	High	Not Found	Not Found	Not Found	Not Found	High	Not Found	Not Found	Not Found	Not Found	Not Found	Not Found	High	Not Found	High	Not Found	Not Found	High	High	High	High	High	High	High	High	High	High	High	High	High	High	High	High	High	High	High	High
		High	HQGVMVGMGQK	1xOxidation [M]; 2xTMT6plex [N-Term; K11]	8.18512e-06	0	5	15	20	Q8BFZ3; P60710; P62737; P68134; P63260	0	1645.89	High	Not Found	Not Found	Not Found	High	High	Not Found	Not Found	Not Found	Not Found	Not Found	Not Found	Not Found	High	High	Not Found	Not Found	High	High	High	High	High	High	High	High	High	High	High	High	High	High	High	High	High	High	High	High
		High	HQGVMVGMGQK	2xTMT6plex [N-Term; K11]	3.40042e-07	0	5	15	4	Q8BFZ3; P60710; P62737; P68134; P63260	0	1629.9	Not Found	Not Found	Not Found	Not Found	Not Found	Not Found	Not Found	Not Found	Not Found	Not Found	Not Found	Not Found	Not Found	High	Not Found	Not Found	Not Found	High	High	High	High	High	High	High	High	High	High	High	High	High	High	High	High	High	High	High	High
		High	HQGVMVGMGQK	2xOxidation [M5; M8]; 2xTMT6plex [N-Term; K11]	2.4151e-05	0	5	15	17	Q8BFZ3; P60710; P62737; P68134; P63260	0	1661.89	High	High	Not Found	Not Found	High	High	Not Found	Not Found	Not Found	Not Found	Not Found	Not Found	Not Found	High	High	Not Found	Not Found	High	High	High	High	High	High	High	High	High	High	High	High	High	High	High	High	High	High	High	High
		High	AGFAGDDAPR	1xTMT6plex [N-Term]	2.09005e-05	0	4	17	32	P60710; P62737; P68134; P63260	0	1205.61	High	High	Not Found	Not Found	Not Found	Not Found	Not Found	Not Found	Not Found	Not Found	High	Not Found	High	Not Found	Not Found	Not Found	Not Found	High	High	High	High	High	High	High	High	High	High	High	High	High	High	High	High	High	High	High	High
		High	TTGIVLDSGDGVTHNVPIYEGYALPHAIMR	1xDeamidated [N15]; 1xTMT6plex [N-Term]	2.23463e-12	0	2	7	2	P62737; P68134	0	3426.76	Not Found	High	Not Found	Not Found	Not Found	Not Found	Not Found	Not Found	Not Found	Not Found	Not Found	Not Found	Not Found	Not Found	Not Found	Not Found	Not Found	High	High	High	High	High	High	High	High	High	High	High	High	High	High	High	High	High	High	High	High
		High	TTGIVLDSGDGVTHNVPIYEGYALPHAIMR	1xOxidation [M29]; 1xDeamidated [N15]; 1xTMT6plex [N-Term]	3.2322e-09	0	2	7	2	P62737; P68134	0	3442.75	Not Found	High	Not Found	Not Found	Not Found	Not Found	Not Found	Not Found	Not Found	Not Found	Not Found	Not Found	Not Found	Not Found	Not Found	Not Found	Not Found	High	High	High	High	High	High	High	High	High	High	High	High	High	High	High	High	High	High	High	High
		High	EITALAPSTMK	1xTMT6plex [K/E]	0.000294368	3.26555e-05	4	9	23	P60710; P62737; P68134; P63260	0	1390.78	Not Found	High	Not Found	Not Found	High	High	Not Found	Not Found	Not Found	Not Found	Not Found	Not Found	Not Found	Not Found	Not Found	Not Found	Not Found	High	High	High	High	High	High	High	High	High	High	High	High	High	High	High	High	High	High	High	High
		High	EITALAPSTMK	1xOxidation [M10]; 1xTMT6plex [N-Term]	0.00032416	3.26555e-05	4	9	6	P60710; P62737; P68134; P63260	0	1406.78	Not Found	High	Not Found	Not Found	Not Found	Not Found	Not Found	Not Found	Not Found	Not Found	Not Found	Not Found	Not Found	Not Found	High	Not Found	Not Found	High	High	High	High	High	High	High	High	High	High	High	High	High	High	High	High	High	High	High	High
		High	YPIEHGIITNWDDMEK	1xTMT6plex [N-Term]	0.000205739	3.26555e-05	2	7	6	P62737; P68134	0	2190.07	Not Found	High	Not Found	Not Found	Not Found	Not Found	Not Found	Not Found	Not Found	Not Found	Not Found	Not Found	Not Found	Not Found	Not Found	Not Found	High	High	High	High	High	High	High	High	High	High	High	High	High	High	High	High	High	High	High	High	High
		High	HQGVMVGMGQK	2xOxidation [M5; M8]; 1xTMT6plex [K/H]	0.000221365	3.26555e-05	5	15	14	Q8BFZ3; P60710; P62737; P68134; P63260	0	1432.72	High	High	High	Not Found	Not Found	High	Not Found	Not Found	Not Found	High	Not Found	High	High	High	Not Found	Not Found	High	High	High	High	High	High	High	High	High	High	High	High	High	High	High	High	High	High	High	High	High
		High	HQGVMVGMGQK	1xOxidation [M]; 1xTMT6plex [H/K]	0.000285614	3.26555e-05	5	15	16	Q8BFZ3; P60710; P62737; P68134; P63260	0	1416.73	High	Not Found	Not Found	High	High	High	Not Found	Not Found	Not Found	High	Not Found	Not Found	High	Not Found	Not Found	Not Found	Not Found	High	High	High	High	High	High	High	High	High	High	High	High	High	High	High	High	High	High	High	High
		High	HQGVMVGMGQK	1xTMT6plex [K/H]	0.000458588	9.38446e-05	5	15	6	Q8BFZ3; P60710; P62737; P68134; P63260	0	1400.73	Not Found	Not Found	High	Not Found	Not Found	Not Found	Not Found	Not Found	Not Found	High	Not Found	Not Found	High	High	Not Found	Not Found	Not Found	High	High	High	High	High	High	High	High	High	High	High	High	High	High	High	High	High	High	High	High
		High	YPIEHGIITNWDDMEK	1xOxidation [M14]; 2xTMT6plex [N-Term; K16]	0.000507369	0.000122941	2	7	27	P62737; P68134	0	2435.23	Not Found	High	High	Not Found	High	High	Not Found	Not Found	Not Found	Not Found	Not Found	Not Found	Not Found	Not Found	Not Found	Not Found	Not Found	High	High	High	High	High	High	High	High	High	High	High	High	High	High	High	High	High	High	High	High
		High	EITALAPSTMK	1xOxidation [M10]; 2xTMT6plex [N-Term; K11]	0.000557928	0.000139833	4	9	92	P60710; P62737; P68134; P63260	0	1635.94	High	Not Found	High	High	High	High	High	Not Found	High	Not Found	Not Found	Not Found	Not Found	Not Found	Not Found	Not Found	Not Found	High	High	High	High	High	High	High	High	High	High	High	High	High	High	High	High	High	High	High	High
		High	YPIEHGIITNWDDMEK	1xDeamidated [N10]; 2xTMT6plex [N-Term; K16]	0.00079637	0.000139833	2	7	6	P62737; P68134	0	2420.22	Not Found	Not Found	Not Found	Not Found	High	High	Not Found	Not Found	Not Found	Not Found	Not Found	Not Found	Not Found	Not Found	Not Found	Not Found	Not Found	High	High	High	High	High	High	High	High	High	High	High	High	High	High	High	High	High	High	High	High
		High	YPIEHGIITNWDDMEK	1xOxidation [M14]; 1xTMT6plex [Y/K]	0.00138148	0.000240044	2	7	14	P62737; P68134	0	2206.07	Not Found	High	Not Found	Not Found	Not Found	Not Found	Not Found	Not Found	Not Found	Not Found	Not Found	High	Not Found	Not Found	Not Found	High	High	High	High	High	High	High	High	High	High	High	High	High	High	High	High	High	High	High	High	High	High
		High	DLTDYLMK	2xTMT6plex [N-Term; K8]	0.00140685	0.000240044	5	13	14	Q8BFZ3; P60710; P62737; P68134; P63260	0	1456.81	Not Found	High	High	High	Not Found	Not Found	Not Found	Not Found	Not Found	Not Found	Not Found	Not Found	Not Found	Not Found	Not Found	Not Found	High	High	High	High	High	High	High	High	High	High	High	High	High	High	High	High	High	High	High	High	High
		High	AGFAGDDAPR		0.00233795	0.00037347	4	17	2	P60710; P62737; P68134; P63260	0	976.448	Not Found	Not Found	Not Found	Not Found	Not Found	Not Found	Not Found	Not Found	High	Not Found	Not Found	Not Found	Not Found	Not Found	Not Found	Not Found	Not Found	High	High	High	High	High	High	High	High	High	High	High	High	High	High	High	High	High	High	High	High
		High	SYELPDGQVITIGNERFR	1xDeamidated [N14]; 1xTMT6plex [N-Term]	0.00264046	0.000392305	5	10	6	Q8BFZ3; P60710; P62737; P68134; P63260	1	2324.21	Not Found	Not Found	High	Not Found	Not Found	Not Found	Not Found	Not Found	Not Found	Not Found	Not Found	Not Found	Not Found	Not Found	Not Found	Not Found	Not Found	High	High	High	High	High	High	High	High	High	High	High	High	High	High	High	High	High	High	High	High
		High	DLYANNVMSGGTTMYPGIADR	2xOxidation [M8; M14]; 1xTMT6plex [N-Term]	0.00281736	0.00040345	1	1	2	P68134	0	2507.17	Not Found	High	Not Found	Not Found	Not Found	Not Found	Not Found	Not Found	Not Found	Not Found	Not Found	Not Found	Not Found	Not Found	Not Found	Not Found	Not Found	High	High	High	High	High	High	High	High	High	High	High	High	High	High	High	High	High	High	High	High
		High	IWHHTFYNELR	1xTMT6plex [N-Term]	0.00395836	0.000417981	3	9	43	P60710; P68134; P63260	0	1744.91	Not Found	High	Not Found	High	Not Found	Not Found	Not Found	Not Found	Not Found	Not Found	Not Found	Not Found	Not Found	Not Found	Not Found	High	High	High	High	High	High	High	High	High	High	High	High	High	High	High	High	High	High	High	High	High	High
		High	DSYVGDEAQSK		0.00438756	0.000458129	4	14	2	P60710; P62737; P68134; P63260	0	1198.52	Not Found	Not Found	Not Found	Not Found	Not Found	Not Found	Not Found	Not Found	High	Not Found	Not Found	Not Found	Not Found	Not Found	Not Found	Not Found	Not Found	High	High	High	High	High	High	High	High	High	High	High	High	High	High	High	High	High	High	High	High
		High	SYELPDGQVITIGNER	2xDeamidated [Q8; N14]; 1xTMT6plex [N-Term]	0.00646962	0.000661109	5	10	8	Q8BFZ3; P60710; P62737; P68134; P63260	0	2022.02	Not Found	Not Found	Not Found	Not Found	Not Found	Not Found	Not Found	Not Found	Not Found	Not Found	Not Found	Not Found	High	High	Not Found	Not Found	Not Found	High	High	High	High	High	High	High	High	High	High	High	High	High	High	High	High	High	High	High	High
		High	EITALAPSTMK	1xGlu->pyro-Glu [N-Term]; 1xTMT6plex [K11]	0.00651642	0.000661109	4	9	1	P60710; P62737; P68134; P63260	0	1372.77	Not Found	Not Found	High	Not Found	Not Found	Not Found	Not Found	Not Found	Not Found	Not Found	Not Found	Not Found	Not Found	Not Found	Not Found	Not Found	Not Found	High	High	High	High	High	High	High	High	High	High	High	High	High	High	High	High	High	High	High	High
		High	EKLCYVALDFENEMATAASSSSLEK	1xDeamidated [N12]; 1xCarbamidomethyl [C4]; 1xTMT6plex [K25]	0.0105856	0.001067	2	5	1	P62737; P68134	1	3023.44	Not Found	Not Found	Not Found	Not Found	Not Found	High	Not Found	Not Found	Not Found	Not Found	Not Found	Not Found	Not Found	Not Found	Not Found	Not Found	Not Found	High	High	High	High	High	High	High	High	High	High	High	High	High	High	High	High	High	High	High	High
		High	IWHHTFYNELR	1xDeamidated [N8]; 1xTMT6plex [N-Term]	0.0109073	0.001067	3	9	5	P60710; P68134; P63260	0	1745.9	Not Found	Not Found	Not Found	Not Found	Not Found	Not Found	Not Found	Not Found	Not Found	Not Found	Not Found	Not Found	Not Found	Not Found	Not Found	Not Found	High	High	High	High	High	High	High	High	High	High	High	High	High	High	High	High	High	High	High	High	High
		High	QEYDEAGPSIVHR		0.0227123	0.00214169	2	3	2	P62737; P68134	0	1500.71	Not Found	Not Found	Not Found	Not Found	Not Found	Not Found	Not Found	High	Not Found	Not Found	Not Found	Not Found	Not Found	Not Found	Not Found	Not Found	Not Found	High	Not Found	High	Not Found	Not Found	Not Found	Not Found	Not Found	Not Found	Not Found	High	Not Found	High	Not Found	Not Found	Not Found	Not Found	Not Found	Not Found	Not Found
		High	DLTDYLMK	1xOxidation [M7]; 1xTMT6plex [N-Term]	0.0282784	0.00261102	5	13	4	Q8BFZ3; P60710; P62737; P68134; P63260	0	1243.64	High	Not Found	Not Found	Not Found	Not Found	Not Found	Not Found	Not Found	Not Found	Not Found	Not Found	Not Found	Not Found	High	Not Found	Not Found	Not Found	High	High	High	High	High	High	High	High	High	High	High	High	High	High	High	High	High	High	High	High
		High	IIAPPER	1xTMT6plex [N-Term]	0.0287274	0.00262807	5	10	12	Q8BFZ3; P60710; P62737; P68134; P63260	0	1024.64	Not Found	Not Found	Not Found	Not Found	Not Found	Not Found	Not Found	Not Found	Not Found	Not Found	Not Found	Not Found	High	High	Not Found	Not Found	Not Found	High	High	High	High	High	High	High	High	High	High	High	High	High	High	High	High	High	High	High	High
		High	HQGVMVGMGQK	1xDeamidated [Q10]; 1xTMT6plex [N-Term]	0.0289547	0.00264551	5	15	2	Q8BFZ3; P60710; P62737; P68134; P63260	0	1401.72	Not Found	Not Found	Not Found	Not Found	Not Found	Not Found	Not Found	Not Found	Not Found	High	Not Found	Not Found	Not Found	Not Found	Not Found	Not Found	Not Found	High	High	High	High	High	High	High	High	High	High	High	High	High	High	High	High	High	High	High	High
		High	YPIEHGIITNWDDMEK	1xDeamidated [N10]; 1xTMT6plex [N-Term]	0.0339209	0.00309371	2	7	2	P62737; P68134	0	2191.06	Not Found	Not Found	Not Found	Not Found	Not Found	Not Found	Not Found	Not Found	Not Found	Not Found	Not Found	Not Found	Not Found	Not Found	Not Found	Not Found	High	High	High	High	High	High	High	High	High	High	High	High	High	High	High	High	High	High	High	High	High
		High	YPIEHGIITNWDDMEK	1xOxidation [M14]; 1xDeamidated [N10]; 2xTMT6plex [N-Term; K16]	0.0361517	0.00328193	2	7	5	P62737; P68134	0	2436.22	Not Found	Not Found	High	Not Found	High	Not Found	Not Found	Not Found	Not Found	Not Found	Not Found	Not Found	Not Found	Not Found	Not Found	High	Not Found	High	High	High	High	High	High	High	High	High	High	High	High	High	High	High	High	High	High	High	High
		High	IWHHTFYNELR		0.0373245	0.00340098	3	9	2	P60710; P68134; P63260	0	1515.75	Not Found	Not Found	Not Found	Not Found	Not Found	Not Found	Not Found	Not Found	Not Found	Not Found	Not Found	Not Found	Not Found	Not Found	Not Found	High	Not Found	High	High	High	High	High	High	High	High	High	High	High	High	High	High	High	High	High	High	High	High
		High	CPETLFQPSFIGMESAGIHETTYNSIMK	1xOxidation [M]; 1xDeamidated [N24]; 1xCarbamidomethyl [C1]; 2xTMT6plex [N-Term; K28]	0.0424318	0.00381714	2	4	2	P62737; P68134	0	3663.78	Not Found	Not Found	Not Found	Not Found	Not Found	High	Not Found	Not Found	Not Found	Not Found	Not Found	Not Found	Not Found	Not Found	Not Found	Not Found	Not Found	High	High	High	High	High	High	High	High	High	High	High	High	High	High	High	High	High	High	High	High
		High	DLTDYLMK	1xTMT6plex [N-Term]	0.0527857	0.00467361	5	13	7	Q8BFZ3; P60710; P62737; P68134; P63260	0	1227.65	Not Found	Not Found	Not Found	Not Found	Not Found	Not Found	Not Found	Not Found	Not Found	Not Found	Not Found	Not Found	High	High	Not Found	Not Found	Not Found	High	High	High	High	High	High	High	High	High	High	High	High	High	High	High	High	High	High	High	High
		High	DLYANNVMSGGTTMYPGIADR	1xOxidation [M]; 1xDeamidated [N]; 1xTMT6plex [N-Term]	0.0596517	0.00531065	1	1	6	P68134	0	2492.16	Not Found	High	Not Found	Not Found	Not Found	Not Found	Not Found	Not Found	Not Found	Not Found	Not Found	Not Found	Not Found	Not Found	Not Found	Not Found	Not Found	High	High	High	High	High	High	High	High	High	High	High	High	High	High	High	High	High	High	High	High
		High	CPETLFQPSFIGMESAGIHETTYNSIMK	1xOxidation [M13]; 1xCarbamidomethyl [C1]; 2xTMT6plex [N-Term; K28]	0.0756876	0.00653625	2	4	1	P62737; P68134	0	3662.79	Not Found	Not Found	Not Found	Not Found	Not Found	High	Not Found	Not Found	Not Found	Not Found	Not Found	Not Found	Not Found	Not Found	Not Found	Not Found	Not Found	High	High	High	High	High	High	High	High	High	High	High	High	High	High	High	High	High	High	High	High
		High	DSYVGDEAQSK	1xDeamidated [Q9]; 2xTMT6plex [N-Term; K11]	0.0815042	0.00687048	4	14	1	P60710; P62737; P68134; P63260	0	1657.83	Not Found	Not Found	High	Not Found	Not Found	Not Found	Not Found	Not Found	Not Found	Not Found	Not Found	Not Found	Not Found	Not Found	Not Found	Not Found	Not Found	High	High	High	High	High	High	High	High	High	High	High	High	High	High	High	High	High	High	High	High
		High	IIAPPER		0.0856226	0.00714981	5	10	1	Q8BFZ3; P60710; P62737; P68134; P63260	0	795.472	Not Found	Not Found	Not Found	Not Found	High	Not Found	Not Found	Not Found	Not Found	Not Found	Not Found	Not Found	Not Found	Not Found	Not Found	Not Found	Not Found	High	High	High	High	High	High	High	High	High	High	High	High	High	High	High	High	High	High	High	High
		High	DLTDYLMK	1xOxidation [M7]; 2xTMT6plex [N-Term; K8]	0.0921763	0.00764945	5	13	4	Q8BFZ3; P60710; P62737; P68134; P63260	0	1472.81	Not Found	High	Not Found	Not Found	Not Found	Not Found	Not Found	Not Found	Not Found	Not Found	Not Found	Not Found	Not Found	Not Found	Not Found	Not Found	High	High	High	High	High	High	High	High	High	High	High	High	High	High	High	High	High	High	High	High	High
		High	IDIAGR	1xTMT6plex [N-Term]	0.0975967	0.00825503	7	15	3	Q8BFZ3; P61164; P61161; P60710; P62737; P68134; P63260	0	873.536	Not Found	Not Found	Not Found	Not Found	Not Found	Not Found	Not Found	Not Found	Not Found	Not Found	Not Found	Not Found	Not Found	High	Not Found	Not Found	Not Found	High	High	High	High	High	High	High	High	High	High	High	High	High	High	High	High	High	High	High	High
High	Master Protein	A0A286YCV9	Kinesin family member 13B OS=Mus musculus OX=10090 GN=Kif13b PE=1 SV=1	0	41.9219	10.0704	13	17	11	1	1847	204.815	5.8	High	Not Found	Not Found	High	High	Not Found	Not Found	Not Found	Not Found	Not Found	High	High	Not Found	High	High	Not Found	Not Found	High	High	High	High	High	High	High	High	High	High	High	High	High	High	High	High	High	High	High
Checked	Protein Group ID	# Proteins	# Unique Peptides	# Peptides	# PSMs	Group Description	Mouse_Cell_661W_TMT_1_HpH_Fract_1.raw	Mouse_Cell_661W_TMT_1_HpH_Fract_10.raw	Mouse_Cell_661W_TMT_1_HpH_Fract_11.raw	Mouse_Cell_661W_TMT_1_HpH_Fract_12.raw	Mouse_Cell_661W_TMT_1_HpH_Fract_13.raw	Mouse_Cell_661W_TMT_1_HpH_Fract_14.raw	Mouse_Cell_661W_TMT_1_HpH_Fract_15.raw	Mouse_Cell_661W_TMT_1_HpH_Fract_16.raw	Mouse_Cell_661W_TMT_1_HpH_Fract_17.raw	Mouse_Cell_661W_TMT_1_HpH_Fract_2.raw	Mouse_Cell_661W_TMT_1_HpH_Fract_3.raw	Mouse_Cell_661W_TMT_1_HpH_Fract_4.raw	Mouse_Cell_661W_TMT_1_HpH_Fract_5.raw	Mouse_Cell_661W_TMT_1_HpH_Fract_6.raw	Mouse_Cell_661W_TMT_1_HpH_Fract_7.raw	Mouse_Cell_661W_TMT_1_HpH_Fract_8.raw	Mouse_Cell_661W_TMT_1_HpH_Fract_9.raw	Found in Sample: [S1] F1: 126, Control	Found in Sample: [S2] F1: 127N, Sample	Found in Sample: [S3] F1: 127C, Sample	Found in Sample: [S4] F1: 128N, Sample	Found in Sample: [S5] F1: 128C, Sample	Found in Sample: [S6] F1: 129N, Sample	Found in Sample: [S7] F1: 129C, Sample	Found in Sample: [S8] F1: 130N, Sample	Found in Sample: [S9] F1: 130C, Sample	Found in Sample: [S10] F1: 131, Sample	Found in Sample Group: F1, 126	Found in Sample Group: F1, 127N	Found in Sample Group: F1, 127C	Found in Sample Group: F1, 128N	Found in Sample Group: F1, 128C	Found in Sample Group: F1, 129N	Found in Sample Group: F1, 129C	Found in Sample Group: F1, 130N	Found in Sample Group: F1, 130C	Found in Sample Group: F1, 131
	3633	5	11	13	18	[Master Protein] Kinesin family member 13B OS=Mus musculus OX=10090 GN=Kif13b PE=1 SV=1	High	Not Found	Not Found	High	High	Not Found	Not Found	Not Found	Not Found	Not Found	High	High	Not Found	High	High	Not Found	Not Found	High	High	High	High	High	High	High	High	High	High	High	High	High	High	High	High	High	High	High	High
	Checked	Confidence	Sequence	Modifications	Qvality PEP	Qvality q-value	# Protein Groups	# Proteins	# PSMs	Master Protein Accessions	# Missed Cleavages	Theo. MH+ [Da]	Mouse_Cell_661W_TMT_1_HpH_Fract_1.raw	Mouse_Cell_661W_TMT_1_HpH_Fract_10.raw	Mouse_Cell_661W_TMT_1_HpH_Fract_11.raw	Mouse_Cell_661W_TMT_1_HpH_Fract_12.raw	Mouse_Cell_661W_TMT_1_HpH_Fract_13.raw	Mouse_Cell_661W_TMT_1_HpH_Fract_14.raw	Mouse_Cell_661W_TMT_1_HpH_Fract_15.raw	Mouse_Cell_661W_TMT_1_HpH_Fract_16.raw	Mouse_Cell_661W_TMT_1_HpH_Fract_17.raw	Mouse_Cell_661W_TMT_1_HpH_Fract_2.raw	Mouse_Cell_661W_TMT_1_HpH_Fract_3.raw	Mouse_Cell_661W_TMT_1_HpH_Fract_4.raw	Mouse_Cell_661W_TMT_1_HpH_Fract_5.raw	Mouse_Cell_661W_TMT_1_HpH_Fract_6.raw	Mouse_Cell_661W_TMT_1_HpH_Fract_7.raw	Mouse_Cell_661W_TMT_1_HpH_Fract_8.raw	Mouse_Cell_661W_TMT_1_HpH_Fract_9.raw	Found in Sample: [S1] F1: 126, Control	Found in Sample: [S2] F1: 127N, Sample	Found in Sample: [S3] F1: 127C, Sample	Found in Sample: [S4] F1: 128N, Sample	Found in Sample: [S5] F1: 128C, Sample	Found in Sample: [S6] F1: 129N, Sample	Found in Sample: [S7] F1: 129C, Sample	Found in Sample: [S8] F1: 130N, Sample	Found in Sample: [S9] F1: 130C, Sample	Found in Sample: [S10] F1: 131, Sample	Found in Sample Group: F1, 126	Found in Sample Group: F1, 127N	Found in Sample Group: F1, 127C	Found in Sample Group: F1, 128N	Found in Sample Group: F1, 128C	Found in Sample Group: F1, 129N	Found in Sample Group: F1, 129C	Found in Sample Group: F1, 130N	Found in Sample Group: F1, 130C	Found in Sample Group: F1, 131
		High	SLTTLGLVISALADQGAGK	2xTMT6plex [N-Term; K19]	9.67658e-07	0	1	2	1	A0A286YCV9	0	2273.35	Not Found	Not Found	Not Found	Not Found	High	Not Found	Not Found	Not Found	Not Found	Not Found	Not Found	Not Found	Not Found	Not Found	Not Found	Not Found	Not Found	High	High	High	High	High	High	High	High	High	High	High	High	High	High	High	High	High	High	High	High
		High	TVAATNMNEESSR	1xOxidation [M7]; 1xTMT6plex [N-Term]	0.000239588	3.26555e-05	1	5	2	A0A286YCV9	0	1654.79	High	Not Found	Not Found	Not Found	Not Found	Not Found	Not Found	Not Found	Not Found	Not Found	Not Found	Not Found	Not Found	Not Found	Not Found	Not Found	Not Found	High	High	High	High	High	High	High	High	High	High	High	High	High	High	High	High	High	High	High	High
		High	ISLVDLAGSER	1xTMT6plex [N-Term]	0.000328082	3.26555e-05	3	15	6	A2AH75; A0A286YCV9; O35071	0	1388.79	Not Found	Not Found	Not Found	Not Found	Not Found	Not Found	Not Found	Not Found	Not Found	Not Found	Not Found	Not Found	Not Found	Not Found	High	Not Found	Not Found	High	High	High	High	High	High	High	High	High	High	High	High	High	High	High	High	High	High	High	High
		High	DSVLTWLLK	2xTMT6plex [N-Term; K9]	0.00032416	3.26555e-05	3	13	1	B1AVY7; A0A286YCV9; O35071	0	1532.95	Not Found	Not Found	Not Found	High	Not Found	Not Found	Not Found	Not Found	Not Found	Not Found	Not Found	Not Found	Not Found	Not Found	Not Found	Not Found	Not Found	High	High	High	High	High	High	High	High	High	High	High	High	High	High	High	High	High	High	High	High
		High	GIAPGPPALSVSPQNNQSPDPGLGGVAASYLNPVK	1xDeamidated [N/Q]; 2xTMT6plex [N-Term; K35]	0.000187702	3.26555e-05	1	2	4	A0A286YCV9	0	3829.05	Not Found	Not Found	Not Found	Not Found	Not Found	Not Found	Not Found	Not Found	Not Found	Not Found	Not Found	Not Found	Not Found	Not Found	High	Not Found	Not Found	High	High	High	High	High	High	High	High	High	High	High	High	High	High	High	High	High	High	High	High
		High	IAGGDDPTEVSSEK	1xTMT6plex [N-Term]	0.000414404	9.38446e-05	1	2	1	A0A286YCV9	0	1633.81	Not Found	Not Found	Not Found	Not Found	Not Found	Not Found	Not Found	Not Found	Not Found	Not Found	High	Not Found	Not Found	Not Found	Not Found	Not Found	Not Found	High	High	High	High	High	High	High	High	High	High	High	High	High	High	High	High	High	High	High	High
		High	APLLSEPASAVPTSPFR	1xTMT6plex [N-Term]	0.000392719	9.38446e-05	1	2	1	A0A286YCV9	0	1969.1	Not Found	Not Found	Not Found	Not Found	Not Found	Not Found	Not Found	Not Found	Not Found	Not Found	Not Found	Not Found	Not Found	High	Not Found	Not Found	Not Found	High	High	High	High	High	High	High	High	High	High	High	High	High	High	High	High	High	High	High	High
		High	DVPTGGIFQLR	1xTMT6plex [N-Term]	0.00100447	0.000139833	1	2	1	A0A286YCV9	0	1431.82	Not Found	Not Found	Not Found	Not Found	Not Found	Not Found	Not Found	Not Found	Not Found	Not Found	High	Not Found	Not Found	Not Found	Not Found	Not Found	Not Found	High	High	High	High	High	High	High	High	High	High	High	High	High	High	High	High	High	High	High	High
		High	VTLQIPTSSLDANR	1xTMT6plex [N-Term]	0.00357588	0.000417981	1	2	1	A0A286YCV9	0	1743.98	Not Found	Not Found	Not Found	Not Found	Not Found	Not Found	Not Found	Not Found	Not Found	Not Found	High	Not Found	Not Found	Not Found	Not Found	Not Found	Not Found	High	High	High	High	High	High	High	High	High	High	High	High	High	High	High	High	High	High	High	High
		High	LIQEMTVTWEEK	2xTMT6plex [N-Term; K12]	0.0048021	0.000501433	1	2	1	A0A286YCV9	0	1965.08	Not Found	Not Found	Not Found	Not Found	Not Found	Not Found	Not Found	Not Found	Not Found	Not Found	High	Not Found	Not Found	Not Found	Not Found	Not Found	Not Found	High	High	High	High	High	High	High	High	High	High	High	High	High	High	High	High	High	High	High	High
		High	SVLAVENLLTLDR	1xDeamidated [N7]; 1xTMT6plex [N-Term]	0.0153303	0.00147617	1	2	1	A0A286YCV9	0	1672.97	High	Not Found	Not Found	Not Found	Not Found	Not Found	Not Found	Not Found	Not Found	Not Found	Not Found	Not Found	Not Found	Not Found	Not Found	Not Found	Not Found	High	High	High	High	High	High	High	High	High	High	High	High	High	High	High	High	High	High	High	High
		High	RQEYLDQQLQK	2xTMT6plex [N-Term; K11]	0.0315835	0.00288924	1	2	1	A0A286YCV9	1	1907.08	Not Found	Not Found	Not Found	Not Found	Not Found	Not Found	Not Found	Not Found	Not Found	Not Found	Not Found	High	Not Found	Not Found	Not Found	Not Found	Not Found	High	High	High	High	High	High	High	High	High	High	High	High	High	High	High	High	High	High	High	High
		High	WLNALTK	2xTMT6plex [N-Term; K7]	0.042092	0.00378332	1	2	1	A0A286YCV9	0	1303.81	Not Found	Not Found	Not Found	Not Found	High	Not Found	Not Found	Not Found	Not Found	Not Found	Not Found	Not Found	Not Found	Not Found	Not Found	Not Found	Not Found	High	High	High	High	High	High	High	High	High	High	High	High	High	High	High	High	High	High	High	High
High	Master Protein	Q91YR9	Prostaglandin reductase 1 OS=Mus musculus OX=10090 GN=Ptgr1 PE=1 SV=2	0	70.2247	34.6505	6	26	6	1	329	35.537	7.96	Not Found	High	High	High	High	High	Not Found	Not Found	Not Found	Not Found	Not Found	Not Found	High	Not Found	High	High	High	High	High	High	High	High	High	High	High	High	High	High	High	High	High	High	High	High	High	High
Checked	Protein Group ID	# Proteins	# Unique Peptides	# Peptides	# PSMs	Group Description	Mouse_Cell_661W_TMT_1_HpH_Fract_1.raw	Mouse_Cell_661W_TMT_1_HpH_Fract_10.raw	Mouse_Cell_661W_TMT_1_HpH_Fract_11.raw	Mouse_Cell_661W_TMT_1_HpH_Fract_12.raw	Mouse_Cell_661W_TMT_1_HpH_Fract_13.raw	Mouse_Cell_661W_TMT_1_HpH_Fract_14.raw	Mouse_Cell_661W_TMT_1_HpH_Fract_15.raw	Mouse_Cell_661W_TMT_1_HpH_Fract_16.raw	Mouse_Cell_661W_TMT_1_HpH_Fract_17.raw	Mouse_Cell_661W_TMT_1_HpH_Fract_2.raw	Mouse_Cell_661W_TMT_1_HpH_Fract_3.raw	Mouse_Cell_661W_TMT_1_HpH_Fract_4.raw	Mouse_Cell_661W_TMT_1_HpH_Fract_5.raw	Mouse_Cell_661W_TMT_1_HpH_Fract_6.raw	Mouse_Cell_661W_TMT_1_HpH_Fract_7.raw	Mouse_Cell_661W_TMT_1_HpH_Fract_8.raw	Mouse_Cell_661W_TMT_1_HpH_Fract_9.raw	Found in Sample: [S1] F1: 126, Control	Found in Sample: [S2] F1: 127N, Sample	Found in Sample: [S3] F1: 127C, Sample	Found in Sample: [S4] F1: 128N, Sample	Found in Sample: [S5] F1: 128C, Sample	Found in Sample: [S6] F1: 129N, Sample	Found in Sample: [S7] F1: 129C, Sample	Found in Sample: [S8] F1: 130N, Sample	Found in Sample: [S9] F1: 130C, Sample	Found in Sample: [S10] F1: 131, Sample	Found in Sample Group: F1, 126	Found in Sample Group: F1, 127N	Found in Sample Group: F1, 127C	Found in Sample Group: F1, 128N	Found in Sample Group: F1, 128C	Found in Sample Group: F1, 129N	Found in Sample Group: F1, 129C	Found in Sample Group: F1, 130N	Found in Sample Group: F1, 130C	Found in Sample Group: F1, 131
	3631	1	6	6	26	[Master Protein] Prostaglandin reductase 1 OS=Mus musculus OX=10090 GN=Ptgr1 PE=1 SV=2	Not Found	High	High	High	High	High	Not Found	Not Found	Not Found	Not Found	Not Found	Not Found	High	Not Found	High	High	High	High	High	High	High	High	High	High	High	High	High	High	High	High	High	High	High	High	High	High	High
	Checked	Confidence	Sequence	Modifications	Qvality PEP	Qvality q-value	# Protein Groups	# Proteins	# PSMs	Master Protein Accessions	# Missed Cleavages	Theo. MH+ [Da]	Mouse_Cell_661W_TMT_1_HpH_Fract_1.raw	Mouse_Cell_661W_TMT_1_HpH_Fract_10.raw	Mouse_Cell_661W_TMT_1_HpH_Fract_11.raw	Mouse_Cell_661W_TMT_1_HpH_Fract_12.raw	Mouse_Cell_661W_TMT_1_HpH_Fract_13.raw	Mouse_Cell_661W_TMT_1_HpH_Fract_14.raw	Mouse_Cell_661W_TMT_1_HpH_Fract_15.raw	Mouse_Cell_661W_TMT_1_HpH_Fract_16.raw	Mouse_Cell_661W_TMT_1_HpH_Fract_17.raw	Mouse_Cell_661W_TMT_1_HpH_Fract_2.raw	Mouse_Cell_661W_TMT_1_HpH_Fract_3.raw	Mouse_Cell_661W_TMT_1_HpH_Fract_4.raw	Mouse_Cell_661W_TMT_1_HpH_Fract_5.raw	Mouse_Cell_661W_TMT_1_HpH_Fract_6.raw	Mouse_Cell_661W_TMT_1_HpH_Fract_7.raw	Mouse_Cell_661W_TMT_1_HpH_Fract_8.raw	Mouse_Cell_661W_TMT_1_HpH_Fract_9.raw	Found in Sample: [S1] F1: 126, Control	Found in Sample: [S2] F1: 127N, Sample	Found in Sample: [S3] F1: 127C, Sample	Found in Sample: [S4] F1: 128N, Sample	Found in Sample: [S5] F1: 128C, Sample	Found in Sample: [S6] F1: 129N, Sample	Found in Sample: [S7] F1: 129C, Sample	Found in Sample: [S8] F1: 130N, Sample	Found in Sample: [S9] F1: 130C, Sample	Found in Sample: [S10] F1: 131, Sample	Found in Sample Group: F1, 126	Found in Sample Group: F1, 127N	Found in Sample Group: F1, 127C	Found in Sample Group: F1, 128N	Found in Sample Group: F1, 128C	Found in Sample Group: F1, 129N	Found in Sample Group: F1, 129C	Found in Sample Group: F1, 130N	Found in Sample Group: F1, 130C	Found in Sample Group: F1, 131
		High	ALTELMNWVSEGK	2xTMT6plex [N-Term; K13]	5.06352e-05	0	1	1	3	Q91YR9	0	1936.06	Not Found	Not Found	Not Found	Not Found	Not Found	Not Found	Not Found	Not Found	Not Found	Not Found	Not Found	Not Found	Not Found	Not Found	Not Found	High	High	High	High	High	High	High	High	High	High	High	High	High	High	High	High	High	High	High	High	High	High
		High	ALTELMNWVSEGK	1xTMT6plex [N-Term]	7.14165e-05	0	1	1	2	Q91YR9	0	1706.9	Not Found	Not Found	Not Found	Not Found	Not Found	Not Found	Not Found	Not Found	Not Found	Not Found	Not Found	Not Found	Not Found	Not Found	High	Not Found	Not Found	High	High	High	High	High	High	High	High	High	High	High	High	High	High	High	High	High	High	High	High
		High	GGETVMVSAAAGAVGSVVGQIAK	2xTMT6plex [N-Term; K23]	4.05228e-13	0	1	1	1	Q91YR9	0	2517.41	Not Found	Not Found	High	Not Found	Not Found	Not Found	Not Found	Not Found	Not Found	Not Found	Not Found	Not Found	Not Found	Not Found	Not Found	Not Found	Not Found	High	High	High	High	High	High	High	High	High	High	High	High	High	High	High	High	High	High	High	High
		High	GGETVMVSAAAGAVGSVVGQIAK	1xOxidation [M6]; 2xTMT6plex [N-Term; K23]	1.28874e-07	0	1	1	1	Q91YR9	0	2533.41	Not Found	Not Found	Not Found	Not Found	Not Found	Not Found	Not Found	Not Found	Not Found	Not Found	Not Found	Not Found	High	Not Found	Not Found	Not Found	Not Found	High	High	High	High	High	High	High	High	High	High	High	High	High	High	High	High	High	High	High	High
		High	TGPCPQGPAPEVVIYQQLR	1xCarbamidomethyl [C4]; 1xTMT6plex [N-Term]	1.12155e-09	0	1	1	6	Q91YR9	0	2339.24	Not Found	High	Not Found	Not Found	Not Found	Not Found	Not Found	Not Found	Not Found	Not Found	Not Found	Not Found	Not Found	Not Found	Not Found	Not Found	High	High	High	High	High	High	High	High	High	High	High	High	High	High	High	High	High	High	High	High	High
		High	ALTELMNWVSEGK	1xOxidation [M6]; 2xTMT6plex [N-Term; K13]	0.00022002	3.26555e-05	1	1	4	Q91YR9	0	1952.06	Not Found	Not Found	Not Found	Not Found	High	High	Not Found	Not Found	Not Found	Not Found	Not Found	Not Found	Not Found	Not Found	Not Found	High	Not Found	High	High	High	High	High	High	High	High	High	High	High	High	High	High	High	High	High	High	High	High
		High	VVGTAGSDEK	1xTMT6plex [N-Term]	0.000805884	0.000139833	1	1	2	Q91YR9	0	1191.64	Not Found	Not Found	Not Found	High	Not Found	Not Found	Not Found	Not Found	Not Found	Not Found	Not Found	Not Found	Not Found	Not Found	Not Found	Not Found	Not Found	High	High	High	High	High	High	High	High	High	High	High	High	High	High	High	High	High	High	High	High
		High	TTELPPLNNGEVLLEALFLSVDPYMR	1xOxidation [M25]; 1xTMT6plex [N-Term]	0.00317096	0.00040345	1	1	1	Q91YR9	0	3176.68	Not Found	Not Found	Not Found	Not Found	High	Not Found	Not Found	Not Found	Not Found	Not Found	Not Found	Not Found	Not Found	Not Found	Not Found	Not Found	Not Found	Not Found	Not Found	Not Found	Not Found	Not Found	Not Found	Not Found	Not Found	Not Found	Not Found	Not Found	Not Found	Not Found	Not Found	Not Found	Not Found	Not Found	Not Found	Not Found	Not Found
		High	TGPCPQGPAPEVVIYQQLR	1xCarbamidomethyl [C4]	0.00298821	0.00040345	1	1	2	Q91YR9	0	2110.07	Not Found	Not Found	Not Found	High	Not Found	Not Found	Not Found	Not Found	Not Found	Not Found	Not Found	Not Found	Not Found	Not Found	Not Found	Not Found	Not Found	High	High	High	High	High	High	High	High	High	High	High	High	High	High	High	High	High	High	High	High
		High	ALTELMNWVSEGK	1xOxidation [M6]; 1xDeamidated [N7]; 2xTMT6plex [N-Term; K13]	0.00395836	0.000417981	1	1	1	Q91YR9	0	1953.04	Not Found	Not Found	Not Found	Not Found	Not Found	High	Not Found	Not Found	Not Found	Not Found	Not Found	Not Found	Not Found	Not Found	Not Found	Not Found	Not Found	High	High	High	High	High	High	High	High	High	High	High	High	High	High	High	High	High	High	High	High
		High	VVGTAGSDEK	2xTMT6plex [N-Term; K10]	0.0257351	0.00236715	1	1	1	Q91YR9	0	1420.8	Not Found	Not Found	Not Found	Not Found	Not Found	Not Found	Not Found	Not Found	Not Found	Not Found	Not Found	Not Found	Not Found	Not Found	High	Not Found	Not Found	High	High	High	High	High	High	High	High	High	High	High	High	High	High	High	High	High	High	High	High
		High	GTIVAALLGWTSHSISDGNGLTK	1xDeamidated [N19]; 2xTMT6plex [N-Term; K23]	0.0674549	0.00572707	1	1	1	Q91YR9	0	2757.52	Not Found	Not Found	Not Found	Not Found	Not Found	High	Not Found	Not Found	Not Found	Not Found	Not Found	Not Found	Not Found	Not Found	Not Found	Not Found	Not Found	High	High	High	High	High	High	High	High	High	High	High	High	High	High	High	High	High	High	High	High
		High	GGETVMVSAAAGAVGSVVGQIAK	1xDeamidated [Q20]; 2xTMT6plex [N-Term; K23]	0.0815042	0.00687048	1	1	1	Q91YR9	0	2518.4	Not Found	Not Found	High	Not Found	Not Found	Not Found	Not Found	Not Found	Not Found	Not Found	Not Found	Not Found	Not Found	Not Found	Not Found	Not Found	Not Found	High	High	High	High	High	High	High	High	High	High	High	High	High	High	High	High	High	High	High	High
High	Master Protein	Q80UG5	Septin-9 OS=Mus musculus OX=10090 GN=Sept9 PE=1 SV=1	0	101.189	27.2727	12	70	12	1	583	65.534	8.9	High	Not Found	High	High	High	High	Not Found	Not Found	High	Not Found	High	Not Found	High	High	Not Found	High	Not Found	High	High	High	High	High	High	High	High	High	High	High	High	High	High	High	High	High	High	High
Checked	Protein Group ID	# Proteins	# Unique Peptides	# Peptides	# PSMs	Group Description	Mouse_Cell_661W_TMT_1_HpH_Fract_1.raw	Mouse_Cell_661W_TMT_1_HpH_Fract_10.raw	Mouse_Cell_661W_TMT_1_HpH_Fract_11.raw	Mouse_Cell_661W_TMT_1_HpH_Fract_12.raw	Mouse_Cell_661W_TMT_1_HpH_Fract_13.raw	Mouse_Cell_661W_TMT_1_HpH_Fract_14.raw	Mouse_Cell_661W_TMT_1_HpH_Fract_15.raw	Mouse_Cell_661W_TMT_1_HpH_Fract_16.raw	Mouse_Cell_661W_TMT_1_HpH_Fract_17.raw	Mouse_Cell_661W_TMT_1_HpH_Fract_2.raw	Mouse_Cell_661W_TMT_1_HpH_Fract_3.raw	Mouse_Cell_661W_TMT_1_HpH_Fract_4.raw	Mouse_Cell_661W_TMT_1_HpH_Fract_5.raw	Mouse_Cell_661W_TMT_1_HpH_Fract_6.raw	Mouse_Cell_661W_TMT_1_HpH_Fract_7.raw	Mouse_Cell_661W_TMT_1_HpH_Fract_8.raw	Mouse_Cell_661W_TMT_1_HpH_Fract_9.raw	Found in Sample: [S1] F1: 126, Control	Found in Sample: [S2] F1: 127N, Sample	Found in Sample: [S3] F1: 127C, Sample	Found in Sample: [S4] F1: 128N, Sample	Found in Sample: [S5] F1: 128C, Sample	Found in Sample: [S6] F1: 129N, Sample	Found in Sample: [S7] F1: 129C, Sample	Found in Sample: [S8] F1: 130N, Sample	Found in Sample: [S9] F1: 130C, Sample	Found in Sample: [S10] F1: 131, Sample	Found in Sample Group: F1, 126	Found in Sample Group: F1, 127N	Found in Sample Group: F1, 127C	Found in Sample Group: F1, 128N	Found in Sample Group: F1, 128C	Found in Sample Group: F1, 129N	Found in Sample Group: F1, 129C	Found in Sample Group: F1, 130N	Found in Sample Group: F1, 130C	Found in Sample Group: F1, 131
	3630	6	12	12	70	[Master Protein] Septin-9 OS=Mus musculus OX=10090 GN=Sept9 PE=1 SV=1	High	Not Found	High	High	High	High	Not Found	Not Found	High	Not Found	High	Not Found	High	High	Not Found	High	Not Found	High	High	High	High	High	High	High	High	High	High	High	High	High	High	High	High	High	High	High	High
	Checked	Confidence	Sequence	Modifications	Qvality PEP	Qvality q-value	# Protein Groups	# Proteins	# PSMs	Master Protein Accessions	# Missed Cleavages	Theo. MH+ [Da]	Mouse_Cell_661W_TMT_1_HpH_Fract_1.raw	Mouse_Cell_661W_TMT_1_HpH_Fract_10.raw	Mouse_Cell_661W_TMT_1_HpH_Fract_11.raw	Mouse_Cell_661W_TMT_1_HpH_Fract_12.raw	Mouse_Cell_661W_TMT_1_HpH_Fract_13.raw	Mouse_Cell_661W_TMT_1_HpH_Fract_14.raw	Mouse_Cell_661W_TMT_1_HpH_Fract_15.raw	Mouse_Cell_661W_TMT_1_HpH_Fract_16.raw	Mouse_Cell_661W_TMT_1_HpH_Fract_17.raw	Mouse_Cell_661W_TMT_1_HpH_Fract_2.raw	Mouse_Cell_661W_TMT_1_HpH_Fract_3.raw	Mouse_Cell_661W_TMT_1_HpH_Fract_4.raw	Mouse_Cell_661W_TMT_1_HpH_Fract_5.raw	Mouse_Cell_661W_TMT_1_HpH_Fract_6.raw	Mouse_Cell_661W_TMT_1_HpH_Fract_7.raw	Mouse_Cell_661W_TMT_1_HpH_Fract_8.raw	Mouse_Cell_661W_TMT_1_HpH_Fract_9.raw	Found in Sample: [S1] F1: 126, Control	Found in Sample: [S2] F1: 127N, Sample	Found in Sample: [S3] F1: 127C, Sample	Found in Sample: [S4] F1: 128N, Sample	Found in Sample: [S5] F1: 128C, Sample	Found in Sample: [S6] F1: 129N, Sample	Found in Sample: [S7] F1: 129C, Sample	Found in Sample: [S8] F1: 130N, Sample	Found in Sample: [S9] F1: 130C, Sample	Found in Sample: [S10] F1: 131, Sample	Found in Sample Group: F1, 126	Found in Sample Group: F1, 127N	Found in Sample Group: F1, 127C	Found in Sample Group: F1, 128N	Found in Sample Group: F1, 128C	Found in Sample Group: F1, 129N	Found in Sample Group: F1, 129C	Found in Sample Group: F1, 130N	Found in Sample Group: F1, 130C	Found in Sample Group: F1, 131
		High	ITADLLSNGIDVYPQK	2xTMT6plex [N-Term; K16]	1.28874e-07	0	1	4	4	Q80UG5	0	2205.25	Not Found	Not Found	Not Found	Not Found	High	Not Found	Not Found	Not Found	Not Found	Not Found	Not Found	Not Found	Not Found	Not Found	Not Found	Not Found	Not Found	High	High	High	High	High	High	High	High	High	High	High	High	High	High	High	High	High	High	High	High
		High	VVNIVPVIAK	2xTMT6plex [N-Term; K10]	1.57494e-05	0	1	5	4	Q80UG5	0	1510.01	Not Found	Not Found	Not Found	Not Found	High	High	Not Found	Not Found	Not Found	Not Found	Not Found	Not Found	Not Found	Not Found	Not Found	Not Found	Not Found	High	High	High	High	High	High	High	High	High	High	High	High	High	High	High	High	High	High	High	High
		High	STLINTLFK	2xTMT6plex [N-Term; K9]	7.46055e-05	0	1	6	1	Q80UG5	0	1494.93	Not Found	Not Found	Not Found	Not Found	Not Found	High	Not Found	Not Found	Not Found	Not Found	Not Found	Not Found	Not Found	Not Found	Not Found	Not Found	Not Found	High	High	High	High	High	High	High	High	High	High	High	High	High	High	High	High	High	High	High	High
		High	LTVIDTPGFGDHINNENCWQPIMK	1xDeamidated [Q/N]; 1xCarbamidomethyl [C18]; 2xTMT6plex [N-Term; K24]	1.83987e-06	0	1	5	7	Q80UG5	0	3258.63	Not Found	Not Found	Not Found	High	Not Found	Not Found	Not Found	Not Found	Not Found	Not Found	Not Found	Not Found	Not Found	Not Found	Not Found	Not Found	Not Found	High	High	High	High	High	High	High	High	High	High	High	High	High	High	High	High	High	High	High	High
		High	YLQEEVNINR	1xTMT6plex [N-Term]	8.13376e-06	0	1	5	12	Q80UG5	0	1506.81	Not Found	Not Found	Not Found	Not Found	Not Found	Not Found	Not Found	Not Found	Not Found	Not Found	Not Found	Not Found	Not Found	Not Found	Not Found	High	Not Found	High	High	High	High	High	High	High	High	High	High	High	High	High	High	High	High	High	High	High	High
		High	APMEFGYVGIDSILEQMR	1xTMT6plex [N-Term]	3.09379e-07	0	1	6	3	Q80UG5	0	2285.15	High	Not Found	Not Found	Not Found	Not Found	Not Found	Not Found	Not Found	Not Found	Not Found	Not Found	Not Found	Not Found	Not Found	Not Found	Not Found	Not Found	High	High	High	High	High	High	High	High	High	High	High	High	High	High	High	High	High	High	High	High
		High	APMEFGYVGIDSILEQMR	1xOxidation [M]; 1xTMT6plex [N-Term]	1.35536e-07	0	1	6	6	Q80UG5	0	2301.15	High	Not Found	Not Found	Not Found	Not Found	Not Found	Not Found	Not Found	Not Found	Not Found	Not Found	Not Found	Not Found	Not Found	Not Found	High	Not Found	High	High	High	High	High	High	High	High	High	High	High	High	High	High	High	High	High	High	High	High
		High	APMEFGYVGIDSILEQMR	2xOxidation [M3; M17]; 1xTMT6plex [N-Term]	4.04327e-06	0	1	6	8	Q80UG5	0	2317.14	High	Not Found	High	Not Found	Not Found	Not Found	Not Found	Not Found	Not Found	Not Found	Not Found	Not Found	High	Not Found	Not Found	High	Not Found	High	High	High	High	High	High	High	High	High	High	High	High	High	High	High	High	High	High	High	High
		High	QVESTASAAGPSR		5.16895e-06	0	1	3	2	Q80UG5	0	1260.62	High	Not Found	Not Found	Not Found	Not Found	Not Found	Not Found	Not Found	Not Found	Not Found	Not Found	Not Found	Not Found	Not Found	Not Found	Not Found	Not Found	High	Not Found	High	High	High	High	High	High	High	High	High	Not Found	High	High	High	High	High	High	High	High
		High	WGTIEVENTTHCEFAYLR	1xDeamidated [N8]; 1xCarbamidomethyl [C12]; 1xTMT6plex [N-Term]	0.000188855	3.26555e-05	1	4	2	Q80UG5	0	2456.18	Not Found	Not Found	Not Found	Not Found	Not Found	Not Found	Not Found	Not Found	Not Found	Not Found	High	Not Found	Not Found	Not Found	Not Found	Not Found	Not Found	High	High	High	High	High	High	High	High	High	High	High	High	High	High	High	High	High	High	High	High
		High	ITADLLSNGIDVYPQK	1xDeamidated [N8]; 2xTMT6plex [N-Term; K16]	0.000200771	3.26555e-05	1	4	2	Q80UG5	0	2206.24	Not Found	Not Found	Not Found	Not Found	Not Found	Not Found	Not Found	Not Found	Not Found	Not Found	Not Found	Not Found	High	Not Found	Not Found	Not Found	Not Found	High	High	High	High	High	High	High	High	High	High	High	High	High	High	High	High	High	High	High	High
		High	EFDEDAEDR	1xTMT6plex [N-Term]	0.000192356	3.26555e-05	1	4	3	Q80UG5	0	1354.6	Not Found	Not Found	Not Found	Not Found	Not Found	Not Found	Not Found	Not Found	High	Not Found	Not Found	Not Found	Not Found	Not Found	Not Found	Not Found	Not Found	High	High	High	High	High	High	High	High	High	High	High	High	High	High	High	High	High	High	High	High
		High	QVESTASAAGPSR	1xTMT6plex [N-Term]	0.000475255	9.38446e-05	1	3	2	Q80UG5	0	1489.78	Not Found	Not Found	Not Found	Not Found	Not Found	Not Found	Not Found	Not Found	Not Found	Not Found	Not Found	Not Found	Not Found	High	Not Found	Not Found	Not Found	High	High	High	High	High	High	High	High	High	High	High	High	High	High	High	High	High	High	High	High
		High	LTVIDTPGFGDHINNENCWQPIMK	1xOxidation [M23]; 1xDeamidated [N/Q]; 1xCarbamidomethyl [C18]; 2xTMT6plex [N-Term; K24]	0.000631922	0.000139833	1	5	4	Q80UG5	0	3274.63	Not Found	Not Found	High	Not Found	Not Found	Not Found	Not Found	Not Found	Not Found	Not Found	Not Found	Not Found	Not Found	Not Found	Not Found	Not Found	Not Found	High	High	High	High	High	High	High	High	High	High	High	High	High	High	High	High	High	High	High	High
		High	APMEFGYVGIDSILEQMR	1xOxidation [M3]; 1xDeamidated [Q16]; 1xTMT6plex [N-Term]	0.00332191	0.00040345	1	6	2	Q80UG5	0	2302.13	Not Found	Not Found	High	Not Found	Not Found	Not Found	Not Found	Not Found	Not Found	Not Found	Not Found	Not Found	Not Found	Not Found	Not Found	Not Found	Not Found	High	High	High	High	High	High	High	High	High	High	High	High	High	High	High	High	High	High	High	High
		High	IPEGSAVPATDAAPK	2xTMT6plex [N-Term; K15]	0.00364891	0.000417981	1	3	1	Q80UG5	0	1882.07	Not Found	Not Found	Not Found	Not Found	Not Found	High	Not Found	Not Found	Not Found	Not Found	Not Found	Not Found	Not Found	Not Found	Not Found	Not Found	Not Found	High	High	High	High	High	High	High	High	High	High	High	High	High	High	High	High	High	High	High	High
		High	FINDQYEK	2xTMT6plex [N-Term; K8]	0.00939606	0.000913822	1	5	1	Q80UG5	0	1514.83	Not Found	Not Found	Not Found	Not Found	Not Found	High	Not Found	Not Found	Not Found	Not Found	Not Found	Not Found	Not Found	Not Found	Not Found	Not Found	Not Found	High	High	High	High	High	High	High	High	High	High	High	High	High	High	High	High	High	High	High	High
		High	VVNIVPVIAK	1xTMT6plex [K/V]	0.042092	0.00378332	1	5	2	Q80UG5	0	1280.85	Not Found	Not Found	Not Found	Not Found	Not Found	High	Not Found	Not Found	Not Found	Not Found	Not Found	Not Found	Not Found	Not Found	Not Found	High	Not Found	High	High	High	High	High	High	High	High	High	High	High	High	High	High	High	High	High	High	High	High
		High	ADTLTLEER	1xTMT6plex [N-Term]	0.0626536	0.00548368	1	5	4	Q80UG5	0	1276.69	Not Found	Not Found	Not Found	Not Found	High	Not Found	Not Found	Not Found	Not Found	Not Found	Not Found	Not Found	Not Found	Not Found	Not Found	Not Found	Not Found	High	High	High	High	High	High	High	High	High	High	High	High	High	High	High	High	High	High	High	High
High	Master Protein	Q9DBS9	Oxysterol-binding protein-related protein 3 OS=Mus musculus OX=10090 GN=Osbpl3 PE=1 SV=2	0	22.4576	12.2807	7	10	7	1	855	96.905	6.51	Not Found	High	High	Not Found	High	Not Found	Not Found	Not Found	Not Found	High	High	Not Found	Not Found	Not Found	Not Found	High	Not Found	High	High	High	High	High	High	High	High	High	High	High	High	High	High	High	High	High	High	High
Checked	Protein Group ID	# Proteins	# Unique Peptides	# Peptides	# PSMs	Group Description	Mouse_Cell_661W_TMT_1_HpH_Fract_1.raw	Mouse_Cell_661W_TMT_1_HpH_Fract_10.raw	Mouse_Cell_661W_TMT_1_HpH_Fract_11.raw	Mouse_Cell_661W_TMT_1_HpH_Fract_12.raw	Mouse_Cell_661W_TMT_1_HpH_Fract_13.raw	Mouse_Cell_661W_TMT_1_HpH_Fract_14.raw	Mouse_Cell_661W_TMT_1_HpH_Fract_15.raw	Mouse_Cell_661W_TMT_1_HpH_Fract_16.raw	Mouse_Cell_661W_TMT_1_HpH_Fract_17.raw	Mouse_Cell_661W_TMT_1_HpH_Fract_2.raw	Mouse_Cell_661W_TMT_1_HpH_Fract_3.raw	Mouse_Cell_661W_TMT_1_HpH_Fract_4.raw	Mouse_Cell_661W_TMT_1_HpH_Fract_5.raw	Mouse_Cell_661W_TMT_1_HpH_Fract_6.raw	Mouse_Cell_661W_TMT_1_HpH_Fract_7.raw	Mouse_Cell_661W_TMT_1_HpH_Fract_8.raw	Mouse_Cell_661W_TMT_1_HpH_Fract_9.raw	Found in Sample: [S1] F1: 126, Control	Found in Sample: [S2] F1: 127N, Sample	Found in Sample: [S3] F1: 127C, Sample	Found in Sample: [S4] F1: 128N, Sample	Found in Sample: [S5] F1: 128C, Sample	Found in Sample: [S6] F1: 129N, Sample	Found in Sample: [S7] F1: 129C, Sample	Found in Sample: [S8] F1: 130N, Sample	Found in Sample: [S9] F1: 130C, Sample	Found in Sample: [S10] F1: 131, Sample	Found in Sample Group: F1, 126	Found in Sample Group: F1, 127N	Found in Sample Group: F1, 127C	Found in Sample Group: F1, 128N	Found in Sample Group: F1, 128C	Found in Sample Group: F1, 129N	Found in Sample Group: F1, 129C	Found in Sample Group: F1, 130N	Found in Sample Group: F1, 130C	Found in Sample Group: F1, 131
	3604	6	7	7	10	[Master Protein] Oxysterol-binding protein-related protein 3 OS=Mus musculus OX=10090 GN=Osbpl3 PE=1 SV=2	Not Found	High	High	Not Found	High	Not Found	Not Found	Not Found	Not Found	High	High	Not Found	Not Found	Not Found	Not Found	High	Not Found	High	High	High	High	High	High	High	High	High	High	High	High	High	High	High	High	High	High	High	High
	Checked	Confidence	Sequence	Modifications	Qvality PEP	Qvality q-value	# Protein Groups	# Proteins	# PSMs	Master Protein Accessions	# Missed Cleavages	Theo. MH+ [Da]	Mouse_Cell_661W_TMT_1_HpH_Fract_1.raw	Mouse_Cell_661W_TMT_1_HpH_Fract_10.raw	Mouse_Cell_661W_TMT_1_HpH_Fract_11.raw	Mouse_Cell_661W_TMT_1_HpH_Fract_12.raw	Mouse_Cell_661W_TMT_1_HpH_Fract_13.raw	Mouse_Cell_661W_TMT_1_HpH_Fract_14.raw	Mouse_Cell_661W_TMT_1_HpH_Fract_15.raw	Mouse_Cell_661W_TMT_1_HpH_Fract_16.raw	Mouse_Cell_661W_TMT_1_HpH_Fract_17.raw	Mouse_Cell_661W_TMT_1_HpH_Fract_2.raw	Mouse_Cell_661W_TMT_1_HpH_Fract_3.raw	Mouse_Cell_661W_TMT_1_HpH_Fract_4.raw	Mouse_Cell_661W_TMT_1_HpH_Fract_5.raw	Mouse_Cell_661W_TMT_1_HpH_Fract_6.raw	Mouse_Cell_661W_TMT_1_HpH_Fract_7.raw	Mouse_Cell_661W_TMT_1_HpH_Fract_8.raw	Mouse_Cell_661W_TMT_1_HpH_Fract_9.raw	Found in Sample: [S1] F1: 126, Control	Found in Sample: [S2] F1: 127N, Sample	Found in Sample: [S3] F1: 127C, Sample	Found in Sample: [S4] F1: 128N, Sample	Found in Sample: [S5] F1: 128C, Sample	Found in Sample: [S6] F1: 129N, Sample	Found in Sample: [S7] F1: 129C, Sample	Found in Sample: [S8] F1: 130N, Sample	Found in Sample: [S9] F1: 130C, Sample	Found in Sample: [S10] F1: 131, Sample	Found in Sample Group: F1, 126	Found in Sample Group: F1, 127N	Found in Sample Group: F1, 127C	Found in Sample Group: F1, 128N	Found in Sample Group: F1, 128C	Found in Sample Group: F1, 129N	Found in Sample Group: F1, 129C	Found in Sample Group: F1, 130N	Found in Sample Group: F1, 130C	Found in Sample Group: F1, 131
		High	SYSDGSEASSEFSK	2xTMT6plex [N-Term; K14]	1.34238e-08	0	1	5	1	Q9DBS9	0	1938.93	Not Found	Not Found	Not Found	Not Found	Not Found	Not Found	Not Found	Not Found	Not Found	High	Not Found	Not Found	Not Found	Not Found	Not Found	Not Found	Not Found	High	High	High	High	High	High	High	High	High	High	High	High	High	High	High	High	High	High	High	High
		High	CIDLDTEEHIYHLK	1xCarbamidomethyl [C1]; 2xTMT6plex [N-Term; K14]	0.00276291	0.00040345	1	6	1	Q9DBS9	0	2244.17	Not Found	High	Not Found	Not Found	Not Found	Not Found	Not Found	Not Found	Not Found	Not Found	Not Found	Not Found	Not Found	Not Found	Not Found	Not Found	Not Found	High	High	High	High	High	High	High	High	High	High	High	High	High	High	High	High	High	High	High	High
		High	QTLGPVLESSGEAR	1xTMT6plex [N-Term]	0.00387831	0.000417981	1	4	2	Q9DBS9	0	1672.91	Not Found	High	Not Found	Not Found	Not Found	Not Found	Not Found	Not Found	Not Found	Not Found	Not Found	Not Found	Not Found	Not Found	Not Found	Not Found	Not Found	High	High	High	High	High	High	High	High	High	High	High	High	High	High	High	High	High	High	High	High
		High	ALVHQLSNESR	1xTMT6plex [N-Term]	0.00438756	0.000458129	1	5	2	Q9DBS9	0	1482.82	Not Found	Not Found	Not Found	Not Found	High	Not Found	Not Found	Not Found	Not Found	Not Found	Not Found	Not Found	Not Found	Not Found	Not Found	Not Found	Not Found	High	High	High	High	High	High	High	High	High	High	High	High	High	High	High	High	High	High	High	High
		High	SMEIVPIGTTHVTLPAFGDHFEWNK	1xOxidation [M2]; 2xTMT6plex [N-Term; K25]	0.0133689	0.00133043	1	4	1	Q9DBS9	0	3300.71	Not Found	Not Found	Not Found	Not Found	Not Found	Not Found	Not Found	Not Found	Not Found	Not Found	High	Not Found	Not Found	Not Found	Not Found	Not Found	Not Found	High	High	High	High	High	High	High	High	High	High	High	High	High	High	High	High	High	High	High	High
		High	VAMPVELNEPLNTLQR	1xTMT6plex [N-Term]	0.0181458	0.00178521	1	4	2	Q9DBS9	0	2053.13	Not Found	Not Found	High	Not Found	Not Found	Not Found	Not Found	Not Found	Not Found	Not Found	Not Found	Not Found	Not Found	Not Found	Not Found	Not Found	Not Found	High	High	High	High	High	High	High	High	High	High	High	High	High	High	High	High	High	High	High	High
		High	SEELFDEWVSK	2xTMT6plex [N-Term; K11]	0.0191516	0.00182238	1	5	1	Q9DBS9	0	1826.96	Not Found	Not Found	Not Found	Not Found	Not Found	Not Found	Not Found	Not Found	Not Found	Not Found	Not Found	Not Found	Not Found	Not Found	Not Found	High	Not Found	High	High	High	High	High	High	High	High	High	High	High	High	High	High	High	High	High	High	High	High
High	Master Protein	Q8R5F7	Interferon-induced helicase C domain-containing protein 1 OS=Mus musculus OX=10090 GN=Ifih1 PE=1 SV=1	0.0087921	2.73189	1.56098	1	1	1	1	1025	115.898	6.25	High	Not Found	Not Found	Not Found	Not Found	Not Found	Not Found	Not Found	Not Found	Not Found	Not Found	Not Found	Not Found	Not Found	Not Found	Not Found	Not Found	High	High	High	High	High	High	High	High	High	High	High	High	High	High	High	High	High	High	High
Checked	Protein Group ID	# Proteins	# Unique Peptides	# Peptides	# PSMs	Group Description	Mouse_Cell_661W_TMT_1_HpH_Fract_1.raw	Mouse_Cell_661W_TMT_1_HpH_Fract_10.raw	Mouse_Cell_661W_TMT_1_HpH_Fract_11.raw	Mouse_Cell_661W_TMT_1_HpH_Fract_12.raw	Mouse_Cell_661W_TMT_1_HpH_Fract_13.raw	Mouse_Cell_661W_TMT_1_HpH_Fract_14.raw	Mouse_Cell_661W_TMT_1_HpH_Fract_15.raw	Mouse_Cell_661W_TMT_1_HpH_Fract_16.raw	Mouse_Cell_661W_TMT_1_HpH_Fract_17.raw	Mouse_Cell_661W_TMT_1_HpH_Fract_2.raw	Mouse_Cell_661W_TMT_1_HpH_Fract_3.raw	Mouse_Cell_661W_TMT_1_HpH_Fract_4.raw	Mouse_Cell_661W_TMT_1_HpH_Fract_5.raw	Mouse_Cell_661W_TMT_1_HpH_Fract_6.raw	Mouse_Cell_661W_TMT_1_HpH_Fract_7.raw	Mouse_Cell_661W_TMT_1_HpH_Fract_8.raw	Mouse_Cell_661W_TMT_1_HpH_Fract_9.raw	Found in Sample: [S1] F1: 126, Control	Found in Sample: [S2] F1: 127N, Sample	Found in Sample: [S3] F1: 127C, Sample	Found in Sample: [S4] F1: 128N, Sample	Found in Sample: [S5] F1: 128C, Sample	Found in Sample: [S6] F1: 129N, Sample	Found in Sample: [S7] F1: 129C, Sample	Found in Sample: [S8] F1: 130N, Sample	Found in Sample: [S9] F1: 130C, Sample	Found in Sample: [S10] F1: 131, Sample	Found in Sample Group: F1, 126	Found in Sample Group: F1, 127N	Found in Sample Group: F1, 127C	Found in Sample Group: F1, 128N	Found in Sample Group: F1, 128C	Found in Sample Group: F1, 129N	Found in Sample Group: F1, 129C	Found in Sample Group: F1, 130N	Found in Sample Group: F1, 130C	Found in Sample Group: F1, 131
	3603	2	1	1	1	[Master Protein] Interferon-induced helicase C domain-containing protein 1 OS=Mus musculus OX=10090 GN=Ifih1 PE=1 SV=1	High	Not Found	Not Found	Not Found	Not Found	Not Found	Not Found	Not Found	Not Found	Not Found	Not Found	Not Found	Not Found	Not Found	Not Found	Not Found	Not Found	High	High	High	High	High	High	High	High	High	High	High	High	High	High	High	High	High	High	High	High
	Checked	Confidence	Sequence	Modifications	Qvality PEP	Qvality q-value	# Protein Groups	# Proteins	# PSMs	Master Protein Accessions	# Missed Cleavages	Theo. MH+ [Da]	Mouse_Cell_661W_TMT_1_HpH_Fract_1.raw	Mouse_Cell_661W_TMT_1_HpH_Fract_10.raw	Mouse_Cell_661W_TMT_1_HpH_Fract_11.raw	Mouse_Cell_661W_TMT_1_HpH_Fract_12.raw	Mouse_Cell_661W_TMT_1_HpH_Fract_13.raw	Mouse_Cell_661W_TMT_1_HpH_Fract_14.raw	Mouse_Cell_661W_TMT_1_HpH_Fract_15.raw	Mouse_Cell_661W_TMT_1_HpH_Fract_16.raw	Mouse_Cell_661W_TMT_1_HpH_Fract_17.raw	Mouse_Cell_661W_TMT_1_HpH_Fract_2.raw	Mouse_Cell_661W_TMT_1_HpH_Fract_3.raw	Mouse_Cell_661W_TMT_1_HpH_Fract_4.raw	Mouse_Cell_661W_TMT_1_HpH_Fract_5.raw	Mouse_Cell_661W_TMT_1_HpH_Fract_6.raw	Mouse_Cell_661W_TMT_1_HpH_Fract_7.raw	Mouse_Cell_661W_TMT_1_HpH_Fract_8.raw	Mouse_Cell_661W_TMT_1_HpH_Fract_9.raw	Found in Sample: [S1] F1: 126, Control	Found in Sample: [S2] F1: 127N, Sample	Found in Sample: [S3] F1: 127C, Sample	Found in Sample: [S4] F1: 128N, Sample	Found in Sample: [S5] F1: 128C, Sample	Found in Sample: [S6] F1: 129N, Sample	Found in Sample: [S7] F1: 129C, Sample	Found in Sample: [S8] F1: 130N, Sample	Found in Sample: [S9] F1: 130C, Sample	Found in Sample: [S10] F1: 131, Sample	Found in Sample Group: F1, 126	Found in Sample Group: F1, 127N	Found in Sample Group: F1, 127C	Found in Sample Group: F1, 128N	Found in Sample Group: F1, 128C	Found in Sample Group: F1, 129N	Found in Sample Group: F1, 129C	Found in Sample Group: F1, 130N	Found in Sample Group: F1, 130C	Found in Sample Group: F1, 131
		High	LDETDEFLMNLFFDNK	1xOxidation [M9]; 2xTMT6plex [N-Term; K16]	0.00312927	0.00040345	1	2	1	Q8R5F7	0	2465.23	High	Not Found	Not Found	Not Found	Not Found	Not Found	Not Found	Not Found	Not Found	Not Found	Not Found	Not Found	Not Found	Not Found	Not Found	Not Found	Not Found	High	High	High	High	High	High	High	High	High	High	High	High	High	High	High	High	High	High	High	High
High	Master Protein	Q9CX34	Protein SGT1 homolog OS=Mus musculus OX=10090 GN=Sugt1 PE=1 SV=3	0	75.9131	42.2619	11	25	11	1	336	38.135	5.45	Not Found	Not Found	High	Not Found	High	High	Not Found	Not Found	Not Found	High	High	High	Not Found	High	High	High	High	High	High	High	High	High	High	High	High	High	High	High	High	High	High	High	High	High	High	High
Checked	Protein Group ID	# Proteins	# Unique Peptides	# Peptides	# PSMs	Group Description	Mouse_Cell_661W_TMT_1_HpH_Fract_1.raw	Mouse_Cell_661W_TMT_1_HpH_Fract_10.raw	Mouse_Cell_661W_TMT_1_HpH_Fract_11.raw	Mouse_Cell_661W_TMT_1_HpH_Fract_12.raw	Mouse_Cell_661W_TMT_1_HpH_Fract_13.raw	Mouse_Cell_661W_TMT_1_HpH_Fract_14.raw	Mouse_Cell_661W_TMT_1_HpH_Fract_15.raw	Mouse_Cell_661W_TMT_1_HpH_Fract_16.raw	Mouse_Cell_661W_TMT_1_HpH_Fract_17.raw	Mouse_Cell_661W_TMT_1_HpH_Fract_2.raw	Mouse_Cell_661W_TMT_1_HpH_Fract_3.raw	Mouse_Cell_661W_TMT_1_HpH_Fract_4.raw	Mouse_Cell_661W_TMT_1_HpH_Fract_5.raw	Mouse_Cell_661W_TMT_1_HpH_Fract_6.raw	Mouse_Cell_661W_TMT_1_HpH_Fract_7.raw	Mouse_Cell_661W_TMT_1_HpH_Fract_8.raw	Mouse_Cell_661W_TMT_1_HpH_Fract_9.raw	Found in Sample: [S1] F1: 126, Control	Found in Sample: [S2] F1: 127N, Sample	Found in Sample: [S3] F1: 127C, Sample	Found in Sample: [S4] F1: 128N, Sample	Found in Sample: [S5] F1: 128C, Sample	Found in Sample: [S6] F1: 129N, Sample	Found in Sample: [S7] F1: 129C, Sample	Found in Sample: [S8] F1: 130N, Sample	Found in Sample: [S9] F1: 130C, Sample	Found in Sample: [S10] F1: 131, Sample	Found in Sample Group: F1, 126	Found in Sample Group: F1, 127N	Found in Sample Group: F1, 127C	Found in Sample Group: F1, 128N	Found in Sample Group: F1, 128C	Found in Sample Group: F1, 129N	Found in Sample Group: F1, 129C	Found in Sample Group: F1, 130N	Found in Sample Group: F1, 130C	Found in Sample Group: F1, 131
	3602	1	11	11	25	[Master Protein] Protein SGT1 homolog OS=Mus musculus OX=10090 GN=Sugt1 PE=1 SV=3	Not Found	Not Found	High	Not Found	High	High	Not Found	Not Found	Not Found	High	High	High	Not Found	High	High	High	High	High	High	High	High	High	High	High	High	High	High	High	High	High	High	High	High	High	High	High	High
	Checked	Confidence	Sequence	Modifications	Qvality PEP	Qvality q-value	# Protein Groups	# Proteins	# PSMs	Master Protein Accessions	# Missed Cleavages	Theo. MH+ [Da]	Mouse_Cell_661W_TMT_1_HpH_Fract_1.raw	Mouse_Cell_661W_TMT_1_HpH_Fract_10.raw	Mouse_Cell_661W_TMT_1_HpH_Fract_11.raw	Mouse_Cell_661W_TMT_1_HpH_Fract_12.raw	Mouse_Cell_661W_TMT_1_HpH_Fract_13.raw	Mouse_Cell_661W_TMT_1_HpH_Fract_14.raw	Mouse_Cell_661W_TMT_1_HpH_Fract_15.raw	Mouse_Cell_661W_TMT_1_HpH_Fract_16.raw	Mouse_Cell_661W_TMT_1_HpH_Fract_17.raw	Mouse_Cell_661W_TMT_1_HpH_Fract_2.raw	Mouse_Cell_661W_TMT_1_HpH_Fract_3.raw	Mouse_Cell_661W_TMT_1_HpH_Fract_4.raw	Mouse_Cell_661W_TMT_1_HpH_Fract_5.raw	Mouse_Cell_661W_TMT_1_HpH_Fract_6.raw	Mouse_Cell_661W_TMT_1_HpH_Fract_7.raw	Mouse_Cell_661W_TMT_1_HpH_Fract_8.raw	Mouse_Cell_661W_TMT_1_HpH_Fract_9.raw	Found in Sample: [S1] F1: 126, Control	Found in Sample: [S2] F1: 127N, Sample	Found in Sample: [S3] F1: 127C, Sample	Found in Sample: [S4] F1: 128N, Sample	Found in Sample: [S5] F1: 128C, Sample	Found in Sample: [S6] F1: 129N, Sample	Found in Sample: [S7] F1: 129C, Sample	Found in Sample: [S8] F1: 130N, Sample	Found in Sample: [S9] F1: 130C, Sample	Found in Sample: [S10] F1: 131, Sample	Found in Sample Group: F1, 126	Found in Sample Group: F1, 127N	Found in Sample Group: F1, 127C	Found in Sample Group: F1, 128N	Found in Sample Group: F1, 128C	Found in Sample Group: F1, 129N	Found in Sample Group: F1, 129C	Found in Sample Group: F1, 130N	Found in Sample Group: F1, 130C	Found in Sample Group: F1, 131
		High	LFQSFSDALIDGDPQAALEELTK	2xTMT6plex [N-Term; K23]	8.02881e-12	0	1	1	2	Q9CX34	0	2966.58	Not Found	Not Found	Not Found	Not Found	Not Found	Not Found	Not Found	Not Found	Not Found	Not Found	Not Found	High	Not Found	Not Found	Not Found	Not Found	Not Found	High	High	High	High	High	High	High	High	High	High	High	High	High	High	High	High	High	High	High	High
		High	LDSTDTNFDTWIK	2xTMT6plex [N-Term; K13]	1.66858e-07	0	1	1	3	Q9CX34	0	2014.05	Not Found	Not Found	Not Found	Not Found	Not Found	Not Found	Not Found	Not Found	Not Found	High	High	Not Found	Not Found	Not Found	Not Found	Not Found	Not Found	High	High	High	High	High	High	High	High	High	High	High	High	High	High	High	High	High	High	High	High
		High	DYASALETFAEGQK	2xTMT6plex [N-Term; K14]	0.00010313	0	1	1	3	Q9CX34	0	1988.04	Not Found	Not Found	Not Found	Not Found	Not Found	High	Not Found	Not Found	Not Found	Not Found	Not Found	Not Found	Not Found	Not Found	Not Found	Not Found	Not Found	High	High	High	High	High	High	High	High	High	High	High	High	High	High	High	High	High	High	High	High
		High	LFQQIYSDGSDEVK	1xTMT6plex [N-Term]	4.96929e-05	0	1	1	2	Q9CX34	0	1857.94	Not Found	Not Found	High	Not Found	Not Found	Not Found	Not Found	Not Found	Not Found	Not Found	Not Found	Not Found	Not Found	Not Found	Not Found	Not Found	Not Found	High	High	High	High	High	High	High	High	High	High	High	High	High	High	High	High	High	High	High	High
		High	AAAAAGPASSQR	1xAcetyl [N-Term]	0.00014678	0	1	1	1	Q9CX34	0	1099.55	Not Found	Not Found	Not Found	Not Found	Not Found	Not Found	Not Found	Not Found	Not Found	Not Found	Not Found	Not Found	Not Found	High	Not Found	Not Found	Not Found	High	High	High	High	High	High	High	High	High	High	High	High	High	High	High	High	High	High	High	High
		High	LLHPIIPEQSTFK	2xTMT6plex [N-Term; K13]	2.11649e-05	0	1	1	2	Q9CX34	0	1981.19	Not Found	Not Found	Not Found	Not Found	Not Found	Not Found	Not Found	Not Found	Not Found	Not Found	Not Found	Not Found	Not Found	Not Found	Not Found	High	High	High	High	High	High	High	High	High	High	High	High	High	High	High	High	High	High	High	High	High	High
		High	SFMESGGTVLSTNWSDVGK	1xOxidation [M3]; 1xDeamidated [N13]; 2xTMT6plex [N-Term; K19]	0.000104419	0	1	1	1	Q9CX34	0	2477.23	Not Found	Not Found	Not Found	Not Found	Not Found	Not Found	Not Found	Not Found	Not Found	Not Found	Not Found	Not Found	Not Found	Not Found	Not Found	Not Found	High	High	High	High	High	High	High	High	High	High	High	High	High	High	High	High	High	High	High	High	High
		High	LFQQIYSDGSDEVK	2xTMT6plex [N-Term; K14]	0.000221365	3.26555e-05	1	1	2	Q9CX34	0	2087.11	Not Found	Not Found	Not Found	Not Found	High	High	Not Found	Not Found	Not Found	Not Found	Not Found	Not Found	Not Found	Not Found	Not Found	Not Found	Not Found	High	High	High	High	High	High	High	High	High	High	High	High	High	High	High	High	High	High	High	High
		High	LEGQGDEPTPK	2xTMT6plex [N-Term; K11]	0.000358998	3.26555e-05	1	1	1	Q9CX34	0	1628.89	Not Found	Not Found	Not Found	Not Found	Not Found	High	Not Found	Not Found	Not Found	Not Found	Not Found	Not Found	Not Found	Not Found	Not Found	Not Found	Not Found	High	High	High	High	High	High	High	High	High	High	High	High	High	High	High	High	High	High	High	High
		High	LFQQIYSDGSDEVKR	2xTMT6plex [N-Term; K14]	0.000175457	3.26555e-05	1	1	1	Q9CX34	1	2243.21	Not Found	Not Found	Not Found	Not Found	Not Found	Not Found	Not Found	Not Found	Not Found	Not Found	Not Found	Not Found	Not Found	Not Found	High	Not Found	Not Found	High	High	High	High	High	High	High	High	High	High	High	High	High	High	High	High	High	High	High	High
		High	IPAGEDYSLK	2xTMT6plex [N-Term; K10]	0.000737244	0.000139833	1	1	1	Q9CX34	0	1550.88	Not Found	Not Found	Not Found	Not Found	Not Found	Not Found	Not Found	Not Found	Not Found	Not Found	High	Not Found	Not Found	Not Found	Not Found	Not Found	Not Found	High	High	High	High	High	High	High	High	High	High	High	High	High	High	High	High	High	High	High	High
		High	DYASALETFAEGQK	1xTMT6plex [K14]	0.00296865	0.00040345	1	1	1	Q9CX34	0	1758.87	Not Found	Not Found	Not Found	Not Found	Not Found	Not Found	Not Found	Not Found	Not Found	Not Found	High	Not Found	Not Found	Not Found	Not Found	Not Found	Not Found	High	High	High	High	High	High	High	High	High	High	High	High	High	High	High	High	High	High	High	High
		High	VEINPPDDMEWK	2xTMT6plex [N-Term; K12]	0.0047687	0.000501433	1	1	1	Q9CX34	0	1931	Not Found	Not Found	Not Found	Not Found	Not Found	Not Found	Not Found	Not Found	Not Found	Not Found	Not Found	Not Found	Not Found	Not Found	Not Found	Not Found	High	High	High	High	High	High	High	High	High	High	High	High	High	High	High	High	High	High	High	High	High
		High	DYASALETFAEGQK	1xDeamidated [Q13]; 2xTMT6plex [N-Term; K14]	0.00537357	0.000539387	1	1	1	Q9CX34	0	1989.02	Not Found	Not Found	Not Found	Not Found	Not Found	High	Not Found	Not Found	Not Found	Not Found	Not Found	Not Found	Not Found	Not Found	Not Found	Not Found	Not Found	High	High	High	High	High	High	High	High	High	High	High	High	High	High	High	High	High	High	High	High
		High	LDSTDTNFDTWIK	1xDeamidated [N7]; 2xTMT6plex [N-Term; K13]	0.0120266	0.00120067	1	1	1	Q9CX34	0	2015.04	Not Found	Not Found	Not Found	Not Found	Not Found	Not Found	Not Found	Not Found	Not Found	Not Found	High	Not Found	Not Found	Not Found	Not Found	Not Found	Not Found	High	High	High	High	High	High	High	High	High	High	High	High	High	High	High	High	High	High	High	High
		High	LDSTDTNFDTWIK	1xTMT6plex [N-Term]	0.0545317	0.00478221	1	1	2	Q9CX34	0	1784.89	Not Found	Not Found	Not Found	Not Found	Not Found	High	Not Found	Not Found	Not Found	Not Found	Not Found	Not Found	Not Found	Not Found	Not Found	Not Found	Not Found	High	High	High	High	High	High	High	High	High	High	High	High	High	High	High	High	High	High	High	High
High	Master Protein	Q6NZQ4	PAX-interacting protein 1 OS=Mus musculus OX=10090 GN=Paxip1 PE=1 SV=1	0.00152012	4.91257	1.51515	1	1	1	1	1056	119.194	7.2	High	Not Found	Not Found	Not Found	Not Found	Not Found	Not Found	Not Found	Not Found	Not Found	Not Found	Not Found	Not Found	Not Found	Not Found	Not Found	Not Found	High	High	High	High	High	High	High	High	High	High	High	High	High	High	High	High	High	High	High
Checked	Protein Group ID	# Proteins	# Unique Peptides	# Peptides	# PSMs	Group Description	Mouse_Cell_661W_TMT_1_HpH_Fract_1.raw	Mouse_Cell_661W_TMT_1_HpH_Fract_10.raw	Mouse_Cell_661W_TMT_1_HpH_Fract_11.raw	Mouse_Cell_661W_TMT_1_HpH_Fract_12.raw	Mouse_Cell_661W_TMT_1_HpH_Fract_13.raw	Mouse_Cell_661W_TMT_1_HpH_Fract_14.raw	Mouse_Cell_661W_TMT_1_HpH_Fract_15.raw	Mouse_Cell_661W_TMT_1_HpH_Fract_16.raw	Mouse_Cell_661W_TMT_1_HpH_Fract_17.raw	Mouse_Cell_661W_TMT_1_HpH_Fract_2.raw	Mouse_Cell_661W_TMT_1_HpH_Fract_3.raw	Mouse_Cell_661W_TMT_1_HpH_Fract_4.raw	Mouse_Cell_661W_TMT_1_HpH_Fract_5.raw	Mouse_Cell_661W_TMT_1_HpH_Fract_6.raw	Mouse_Cell_661W_TMT_1_HpH_Fract_7.raw	Mouse_Cell_661W_TMT_1_HpH_Fract_8.raw	Mouse_Cell_661W_TMT_1_HpH_Fract_9.raw	Found in Sample: [S1] F1: 126, Control	Found in Sample: [S2] F1: 127N, Sample	Found in Sample: [S3] F1: 127C, Sample	Found in Sample: [S4] F1: 128N, Sample	Found in Sample: [S5] F1: 128C, Sample	Found in Sample: [S6] F1: 129N, Sample	Found in Sample: [S7] F1: 129C, Sample	Found in Sample: [S8] F1: 130N, Sample	Found in Sample: [S9] F1: 130C, Sample	Found in Sample: [S10] F1: 131, Sample	Found in Sample Group: F1, 126	Found in Sample Group: F1, 127N	Found in Sample Group: F1, 127C	Found in Sample Group: F1, 128N	Found in Sample Group: F1, 128C	Found in Sample Group: F1, 129N	Found in Sample Group: F1, 129C	Found in Sample Group: F1, 130N	Found in Sample Group: F1, 130C	Found in Sample Group: F1, 131
	3600	2	1	1	1	[Master Protein] PAX-interacting protein 1 OS=Mus musculus OX=10090 GN=Paxip1 PE=1 SV=1	High	Not Found	Not Found	Not Found	Not Found	Not Found	Not Found	Not Found	Not Found	Not Found	Not Found	Not Found	Not Found	Not Found	Not Found	Not Found	Not Found	High	High	High	High	High	High	High	High	High	High	High	High	High	High	High	High	High	High	High	High
	Checked	Confidence	Sequence	Modifications	Qvality PEP	Qvality q-value	# Protein Groups	# Proteins	# PSMs	Master Protein Accessions	# Missed Cleavages	Theo. MH+ [Da]	Mouse_Cell_661W_TMT_1_HpH_Fract_1.raw	Mouse_Cell_661W_TMT_1_HpH_Fract_10.raw	Mouse_Cell_661W_TMT_1_HpH_Fract_11.raw	Mouse_Cell_661W_TMT_1_HpH_Fract_12.raw	Mouse_Cell_661W_TMT_1_HpH_Fract_13.raw	Mouse_Cell_661W_TMT_1_HpH_Fract_14.raw	Mouse_Cell_661W_TMT_1_HpH_Fract_15.raw	Mouse_Cell_661W_TMT_1_HpH_Fract_16.raw	Mouse_Cell_661W_TMT_1_HpH_Fract_17.raw	Mouse_Cell_661W_TMT_1_HpH_Fract_2.raw	Mouse_Cell_661W_TMT_1_HpH_Fract_3.raw	Mouse_Cell_661W_TMT_1_HpH_Fract_4.raw	Mouse_Cell_661W_TMT_1_HpH_Fract_5.raw	Mouse_Cell_661W_TMT_1_HpH_Fract_6.raw	Mouse_Cell_661W_TMT_1_HpH_Fract_7.raw	Mouse_Cell_661W_TMT_1_HpH_Fract_8.raw	Mouse_Cell_661W_TMT_1_HpH_Fract_9.raw	Found in Sample: [S1] F1: 126, Control	Found in Sample: [S2] F1: 127N, Sample	Found in Sample: [S3] F1: 127C, Sample	Found in Sample: [S4] F1: 128N, Sample	Found in Sample: [S5] F1: 128C, Sample	Found in Sample: [S6] F1: 129N, Sample	Found in Sample: [S7] F1: 129C, Sample	Found in Sample: [S8] F1: 130N, Sample	Found in Sample: [S9] F1: 130C, Sample	Found in Sample: [S10] F1: 131, Sample	Found in Sample Group: F1, 126	Found in Sample Group: F1, 127N	Found in Sample Group: F1, 127C	Found in Sample Group: F1, 128N	Found in Sample Group: F1, 128C	Found in Sample Group: F1, 129N	Found in Sample Group: F1, 129C	Found in Sample Group: F1, 130N	Found in Sample Group: F1, 130C	Found in Sample Group: F1, 131
		High	YYAVGDIDPQVIQLLK	2xTMT6plex [N-Term; K16]	1.5071e-05	0	1	2	1	Q6NZQ4	0	2293.32	High	Not Found	Not Found	Not Found	Not Found	Not Found	Not Found	Not Found	Not Found	Not Found	Not Found	Not Found	Not Found	Not Found	Not Found	Not Found	Not Found	High	High	High	High	High	High	High	High	High	High	High	High	High	High	High	High	High	High	High	High
High	Master Protein	Q6PDQ2	Chromodomain-helicase-DNA-binding protein 4 OS=Mus musculus OX=10090 GN=Chd4 PE=1 SV=1	0	46.5146	8.82507	12	16	12	1	1915	217.614	5.81	High	High	Not Found	Not Found	Not Found	Not Found	Not Found	Not Found	Not Found	High	High	Not Found	High	Not Found	Not Found	High	Not Found	High	High	High	High	High	High	High	High	High	High	High	High	High	High	High	High	High	High	High
Checked	Protein Group ID	# Proteins	# Unique Peptides	# Peptides	# PSMs	Group Description	Mouse_Cell_661W_TMT_1_HpH_Fract_1.raw	Mouse_Cell_661W_TMT_1_HpH_Fract_10.raw	Mouse_Cell_661W_TMT_1_HpH_Fract_11.raw	Mouse_Cell_661W_TMT_1_HpH_Fract_12.raw	Mouse_Cell_661W_TMT_1_HpH_Fract_13.raw	Mouse_Cell_661W_TMT_1_HpH_Fract_14.raw	Mouse_Cell_661W_TMT_1_HpH_Fract_15.raw	Mouse_Cell_661W_TMT_1_HpH_Fract_16.raw	Mouse_Cell_661W_TMT_1_HpH_Fract_17.raw	Mouse_Cell_661W_TMT_1_HpH_Fract_2.raw	Mouse_Cell_661W_TMT_1_HpH_Fract_3.raw	Mouse_Cell_661W_TMT_1_HpH_Fract_4.raw	Mouse_Cell_661W_TMT_1_HpH_Fract_5.raw	Mouse_Cell_661W_TMT_1_HpH_Fract_6.raw	Mouse_Cell_661W_TMT_1_HpH_Fract_7.raw	Mouse_Cell_661W_TMT_1_HpH_Fract_8.raw	Mouse_Cell_661W_TMT_1_HpH_Fract_9.raw	Found in Sample: [S1] F1: 126, Control	Found in Sample: [S2] F1: 127N, Sample	Found in Sample: [S3] F1: 127C, Sample	Found in Sample: [S4] F1: 128N, Sample	Found in Sample: [S5] F1: 128C, Sample	Found in Sample: [S6] F1: 129N, Sample	Found in Sample: [S7] F1: 129C, Sample	Found in Sample: [S8] F1: 130N, Sample	Found in Sample: [S9] F1: 130C, Sample	Found in Sample: [S10] F1: 131, Sample	Found in Sample Group: F1, 126	Found in Sample Group: F1, 127N	Found in Sample Group: F1, 127C	Found in Sample Group: F1, 128N	Found in Sample Group: F1, 128C	Found in Sample Group: F1, 129N	Found in Sample Group: F1, 129C	Found in Sample Group: F1, 130N	Found in Sample Group: F1, 130C	Found in Sample Group: F1, 131
	3599	10	12	12	16	[Master Protein] Chromodomain-helicase-DNA-binding protein 4 OS=Mus musculus OX=10090 GN=Chd4 PE=1 SV=1	High	High	Not Found	Not Found	Not Found	Not Found	Not Found	Not Found	Not Found	High	High	Not Found	High	Not Found	Not Found	High	Not Found	High	High	High	High	High	High	High	High	High	High	High	High	High	High	High	High	High	High	High	High
	Checked	Confidence	Sequence	Modifications	Qvality PEP	Qvality q-value	# Protein Groups	# Proteins	# PSMs	Master Protein Accessions	# Missed Cleavages	Theo. MH+ [Da]	Mouse_Cell_661W_TMT_1_HpH_Fract_1.raw	Mouse_Cell_661W_TMT_1_HpH_Fract_10.raw	Mouse_Cell_661W_TMT_1_HpH_Fract_11.raw	Mouse_Cell_661W_TMT_1_HpH_Fract_12.raw	Mouse_Cell_661W_TMT_1_HpH_Fract_13.raw	Mouse_Cell_661W_TMT_1_HpH_Fract_14.raw	Mouse_Cell_661W_TMT_1_HpH_Fract_15.raw	Mouse_Cell_661W_TMT_1_HpH_Fract_16.raw	Mouse_Cell_661W_TMT_1_HpH_Fract_17.raw	Mouse_Cell_661W_TMT_1_HpH_Fract_2.raw	Mouse_Cell_661W_TMT_1_HpH_Fract_3.raw	Mouse_Cell_661W_TMT_1_HpH_Fract_4.raw	Mouse_Cell_661W_TMT_1_HpH_Fract_5.raw	Mouse_Cell_661W_TMT_1_HpH_Fract_6.raw	Mouse_Cell_661W_TMT_1_HpH_Fract_7.raw	Mouse_Cell_661W_TMT_1_HpH_Fract_8.raw	Mouse_Cell_661W_TMT_1_HpH_Fract_9.raw	Found in Sample: [S1] F1: 126, Control	Found in Sample: [S2] F1: 127N, Sample	Found in Sample: [S3] F1: 127C, Sample	Found in Sample: [S4] F1: 128N, Sample	Found in Sample: [S5] F1: 128C, Sample	Found in Sample: [S6] F1: 129N, Sample	Found in Sample: [S7] F1: 129C, Sample	Found in Sample: [S8] F1: 130N, Sample	Found in Sample: [S9] F1: 130C, Sample	Found in Sample: [S10] F1: 131, Sample	Found in Sample Group: F1, 126	Found in Sample Group: F1, 127N	Found in Sample Group: F1, 127C	Found in Sample Group: F1, 128N	Found in Sample Group: F1, 128C	Found in Sample Group: F1, 129N	Found in Sample Group: F1, 129C	Found in Sample Group: F1, 130N	Found in Sample Group: F1, 130C	Found in Sample Group: F1, 131
		High	NQDETEDTELQGMNEYLSSFK	2xTMT6plex [N-Term; K21]	1.55116e-10	0	1	4	1	Q6PDQ2	0	2936.39	Not Found	Not Found	Not Found	Not Found	Not Found	Not Found	Not Found	Not Found	Not Found	Not Found	High	Not Found	Not Found	Not Found	Not Found	Not Found	Not Found	High	High	High	High	High	High	High	High	High	High	High	High	High	High	High	High	High	High	High	High
		High	GGGNQVSLLNVVMDLK	2xTMT6plex [N-Term; K16]	2.25779e-07	0	1	3	1	Q6PDQ2	0	2102.2	Not Found	High	Not Found	Not Found	Not Found	Not Found	Not Found	Not Found	Not Found	Not Found	Not Found	Not Found	Not Found	Not Found	Not Found	Not Found	Not Found	High	High	High	High	High	High	High	High	High	High	High	High	High	High	High	High	High	High	High	High
		High	DLPYDQASWESEDVEIQDYDLFK	2xTMT6plex [N-Term; K23]	1.44217e-05	0	1	3	1	Q6PDQ2	0	3263.57	Not Found	Not Found	Not Found	Not Found	Not Found	Not Found	Not Found	Not Found	Not Found	High	Not Found	Not Found	Not Found	Not Found	Not Found	Not Found	Not Found	High	High	High	High	High	High	High	High	High	High	High	High	High	High	High	High	High	High	High	High
		High	SAVDLTPIVVEDKEEK	3xTMT6plex [N-Term; K13; K16]	4.8842e-08	0	1	3	1	Q6PDQ2	1	2459.42	Not Found	High	Not Found	Not Found	Not Found	Not Found	Not Found	Not Found	Not Found	Not Found	Not Found	Not Found	Not Found	Not Found	Not Found	Not Found	Not Found	High	High	High	High	High	High	High	High	High	High	High	High	High	High	High	High	High	High	High	High
		High	QEESVDPDYWEK	2xTMT6plex [N-Term; K12]	0.000805884	0.000139833	1	4	2	Q6PDQ2	0	1982.97	Not Found	Not Found	Not Found	Not Found	Not Found	Not Found	Not Found	Not Found	Not Found	Not Found	Not Found	Not Found	Not Found	Not Found	Not Found	High	Not Found	High	High	High	High	High	High	High	High	High	High	High	High	High	High	High	High	High	High	High	High
		High	FSWAQGTDTILADEMGLGK	2xTMT6plex [N-Term; K19]	0.00272728	0.00040345	1	9	1	Q6PDQ2	0	2498.3	Not Found	Not Found	Not Found	Not Found	Not Found	Not Found	Not Found	Not Found	Not Found	Not Found	Not Found	Not Found	Not Found	Not Found	Not Found	High	Not Found	High	High	High	High	High	High	High	High	High	High	High	High	High	High	High	High	High	High	High	High
		High	MPNGMYDGSALIR	2xOxidation [M1; M5]; 1xTMT6plex [N-Term]	0.00710766	0.000720308	1	1	1	Q6PDQ2	0	1685.82	High	Not Found	Not Found	Not Found	Not Found	Not Found	Not Found	Not Found	Not Found	Not Found	Not Found	Not Found	Not Found	Not Found	Not Found	Not Found	Not Found	High	High	High	High	High	High	High	High	High	High	High	High	High	High	High	High	High	High	High	High
		High	APEPPPQQVAQQQ	1xTMT6plex [N-Term]	0.0109073	0.001067	1	3	2	Q6PDQ2	0	1646.87	Not Found	Not Found	Not Found	Not Found	Not Found	Not Found	Not Found	Not Found	Not Found	High	Not Found	Not Found	Not Found	Not Found	Not Found	Not Found	Not Found	High	High	High	High	High	High	High	High	High	High	High	High	High	High	High	High	High	High	High	High
		High	LLEQALVIEEQLR	1xTMT6plex [N-Term]	0.0663559	0.00564636	1	9	2	Q6PDQ2	0	1783.05	Not Found	Not Found	Not Found	Not Found	Not Found	Not Found	Not Found	Not Found	Not Found	Not Found	High	Not Found	Not Found	Not Found	Not Found	Not Found	Not Found	High	High	High	High	High	High	High	High	High	High	High	High	High	High	High	High	High	High	High	High
		High	GNFLEIK	2xTMT6plex [N-Term; K7]	0.0674549	0.00572707	1	3	1	Q6PDQ2	0	1278.78	High	Not Found	Not Found	Not Found	Not Found	Not Found	Not Found	Not Found	Not Found	Not Found	Not Found	Not Found	Not Found	Not Found	Not Found	Not Found	Not Found	High	High	High	High	High	High	High	High	High	High	High	High	High	High	High	High	High	High	High	High
		High	GTTEVEK	2xTMT6plex [N-Term; K7]	0.0801747	0.00679016	1	3	1	Q6PDQ2	0	1221.71	Not Found	Not Found	Not Found	Not Found	Not Found	Not Found	Not Found	Not Found	Not Found	High	Not Found	Not Found	Not Found	Not Found	Not Found	Not Found	Not Found	High	High	High	High	High	High	High	High	High	High	High	High	High	High	High	High	High	High	High	High
		High	FSWAQGTDTILADEMGLGK	1xOxidation [M15]; 1xDeamidated [Q5]; 2xTMT6plex [N-Term; K19]	0.0975967	0.00825503	1	9	1	Q6PDQ2	0	2515.28	Not Found	Not Found	Not Found	Not Found	Not Found	Not Found	Not Found	Not Found	Not Found	Not Found	Not Found	Not Found	High	Not Found	Not Found	Not Found	Not Found	High	High	High	High	High	High	High	High	High	High	High	High	High	High	High	High	High	High	High	High
		High	YAILNEPFK	2xTMT6plex [N-Term; K9]	0.102475	0.00870815	1	3	1	Q6PDQ2	0	1552.91	Not Found	Not Found	Not Found	Not Found	Not Found	Not Found	Not Found	Not Found	Not Found	Not Found	High	Not Found	Not Found	Not Found	Not Found	Not Found	Not Found	High	High	High	High	High	High	High	High	High	High	High	High	High	High	High	High	High	High	High	High
High	Master Protein	Q62425	Cytochrome c oxidase subunit NDUFA4 OS=Mus musculus OX=10090 GN=Ndufa4 PE=1 SV=2	0	8.24495	31.7073	3	5	3	1	82	9.321	9.52	High	Not Found	Not Found	Not Found	Not Found	High	Not Found	Not Found	Not Found	Not Found	Not Found	High	Not Found	Not Found	Not Found	Not Found	Not Found	High	High	High	High	High	High	High	High	High	High	High	High	High	High	High	High	High	High	High
Checked	Protein Group ID	# Proteins	# Unique Peptides	# Peptides	# PSMs	Group Description	Mouse_Cell_661W_TMT_1_HpH_Fract_1.raw	Mouse_Cell_661W_TMT_1_HpH_Fract_10.raw	Mouse_Cell_661W_TMT_1_HpH_Fract_11.raw	Mouse_Cell_661W_TMT_1_HpH_Fract_12.raw	Mouse_Cell_661W_TMT_1_HpH_Fract_13.raw	Mouse_Cell_661W_TMT_1_HpH_Fract_14.raw	Mouse_Cell_661W_TMT_1_HpH_Fract_15.raw	Mouse_Cell_661W_TMT_1_HpH_Fract_16.raw	Mouse_Cell_661W_TMT_1_HpH_Fract_17.raw	Mouse_Cell_661W_TMT_1_HpH_Fract_2.raw	Mouse_Cell_661W_TMT_1_HpH_Fract_3.raw	Mouse_Cell_661W_TMT_1_HpH_Fract_4.raw	Mouse_Cell_661W_TMT_1_HpH_Fract_5.raw	Mouse_Cell_661W_TMT_1_HpH_Fract_6.raw	Mouse_Cell_661W_TMT_1_HpH_Fract_7.raw	Mouse_Cell_661W_TMT_1_HpH_Fract_8.raw	Mouse_Cell_661W_TMT_1_HpH_Fract_9.raw	Found in Sample: [S1] F1: 126, Control	Found in Sample: [S2] F1: 127N, Sample	Found in Sample: [S3] F1: 127C, Sample	Found in Sample: [S4] F1: 128N, Sample	Found in Sample: [S5] F1: 128C, Sample	Found in Sample: [S6] F1: 129N, Sample	Found in Sample: [S7] F1: 129C, Sample	Found in Sample: [S8] F1: 130N, Sample	Found in Sample: [S9] F1: 130C, Sample	Found in Sample: [S10] F1: 131, Sample	Found in Sample Group: F1, 126	Found in Sample Group: F1, 127N	Found in Sample Group: F1, 127C	Found in Sample Group: F1, 128N	Found in Sample Group: F1, 128C	Found in Sample Group: F1, 129N	Found in Sample Group: F1, 129C	Found in Sample Group: F1, 130N	Found in Sample Group: F1, 130C	Found in Sample Group: F1, 131
	3598	2	3	3	5	[Master Protein] Cytochrome c oxidase subunit NDUFA4 OS=Mus musculus OX=10090 GN=Ndufa4 PE=1 SV=2	High	Not Found	Not Found	Not Found	Not Found	High	Not Found	Not Found	Not Found	Not Found	Not Found	High	Not Found	Not Found	Not Found	Not Found	Not Found	High	High	High	High	High	High	High	High	High	High	High	High	High	High	High	High	High	High	High	High
	Checked	Confidence	Sequence	Modifications	Qvality PEP	Qvality q-value	# Protein Groups	# Proteins	# PSMs	Master Protein Accessions	# Missed Cleavages	Theo. MH+ [Da]	Mouse_Cell_661W_TMT_1_HpH_Fract_1.raw	Mouse_Cell_661W_TMT_1_HpH_Fract_10.raw	Mouse_Cell_661W_TMT_1_HpH_Fract_11.raw	Mouse_Cell_661W_TMT_1_HpH_Fract_12.raw	Mouse_Cell_661W_TMT_1_HpH_Fract_13.raw	Mouse_Cell_661W_TMT_1_HpH_Fract_14.raw	Mouse_Cell_661W_TMT_1_HpH_Fract_15.raw	Mouse_Cell_661W_TMT_1_HpH_Fract_16.raw	Mouse_Cell_661W_TMT_1_HpH_Fract_17.raw	Mouse_Cell_661W_TMT_1_HpH_Fract_2.raw	Mouse_Cell_661W_TMT_1_HpH_Fract_3.raw	Mouse_Cell_661W_TMT_1_HpH_Fract_4.raw	Mouse_Cell_661W_TMT_1_HpH_Fract_5.raw	Mouse_Cell_661W_TMT_1_HpH_Fract_6.raw	Mouse_Cell_661W_TMT_1_HpH_Fract_7.raw	Mouse_Cell_661W_TMT_1_HpH_Fract_8.raw	Mouse_Cell_661W_TMT_1_HpH_Fract_9.raw	Found in Sample: [S1] F1: 126, Control	Found in Sample: [S2] F1: 127N, Sample	Found in Sample: [S3] F1: 127C, Sample	Found in Sample: [S4] F1: 128N, Sample	Found in Sample: [S5] F1: 128C, Sample	Found in Sample: [S6] F1: 129N, Sample	Found in Sample: [S7] F1: 129C, Sample	Found in Sample: [S8] F1: 130N, Sample	Found in Sample: [S9] F1: 130C, Sample	Found in Sample: [S10] F1: 131, Sample	Found in Sample Group: F1, 126	Found in Sample Group: F1, 127N	Found in Sample Group: F1, 127C	Found in Sample Group: F1, 128N	Found in Sample Group: F1, 128C	Found in Sample Group: F1, 129N	Found in Sample Group: F1, 129C	Found in Sample Group: F1, 130N	Found in Sample Group: F1, 130C	Found in Sample Group: F1, 131
		High	FYSVNVDYSK	2xTMT6plex [N-Term; K10]	0.00040705	9.38446e-05	1	2	3	Q62425	0	1679.9	High	Not Found	Not Found	Not Found	Not Found	High	Not Found	Not Found	Not Found	Not Found	Not Found	Not Found	Not Found	Not Found	Not Found	Not Found	Not Found	High	High	High	High	High	High	High	High	High	High	High	High	High	High	High	High	High	High	High	High
		High	LGPNEQYK	2xTMT6plex [N-Term; K8]	0.00123162	0.000215237	1	2	1	Q62425	0	1406.8	Not Found	Not Found	Not Found	Not Found	Not Found	Not Found	Not Found	Not Found	Not Found	Not Found	Not Found	High	Not Found	Not Found	Not Found	Not Found	Not Found	High	High	High	High	High	High	High	High	High	High	High	High	High	High	High	High	High	High	High	High
		High	NNPEPWNK	2xTMT6plex [N-Term; K8]	0.0471217	0.00427221	1	2	1	Q62425	0	1456.79	Not Found	Not Found	Not Found	Not Found	Not Found	Not Found	Not Found	Not Found	Not Found	Not Found	Not Found	High	Not Found	Not Found	Not Found	Not Found	Not Found	High	High	High	High	High	High	High	High	High	High	High	High	High	High	High	High	High	High	High	High
High	Master Protein	Q921J2	GTP-binding protein Rheb OS=Mus musculus OX=10090 GN=Rheb PE=1 SV=1	0	26.0524	28.8043	5	9	5	1	184	20.439	5.92	High	Not Found	High	Not Found	Not Found	High	Not Found	Not Found	Not Found	High	High	Not Found	Not Found	Not Found	Not Found	Not Found	Not Found	High	High	High	High	High	High	High	High	High	High	High	High	High	High	High	High	High	High	High
Checked	Protein Group ID	# Proteins	# Unique Peptides	# Peptides	# PSMs	Group Description	Mouse_Cell_661W_TMT_1_HpH_Fract_1.raw	Mouse_Cell_661W_TMT_1_HpH_Fract_10.raw	Mouse_Cell_661W_TMT_1_HpH_Fract_11.raw	Mouse_Cell_661W_TMT_1_HpH_Fract_12.raw	Mouse_Cell_661W_TMT_1_HpH_Fract_13.raw	Mouse_Cell_661W_TMT_1_HpH_Fract_14.raw	Mouse_Cell_661W_TMT_1_HpH_Fract_15.raw	Mouse_Cell_661W_TMT_1_HpH_Fract_16.raw	Mouse_Cell_661W_TMT_1_HpH_Fract_17.raw	Mouse_Cell_661W_TMT_1_HpH_Fract_2.raw	Mouse_Cell_661W_TMT_1_HpH_Fract_3.raw	Mouse_Cell_661W_TMT_1_HpH_Fract_4.raw	Mouse_Cell_661W_TMT_1_HpH_Fract_5.raw	Mouse_Cell_661W_TMT_1_HpH_Fract_6.raw	Mouse_Cell_661W_TMT_1_HpH_Fract_7.raw	Mouse_Cell_661W_TMT_1_HpH_Fract_8.raw	Mouse_Cell_661W_TMT_1_HpH_Fract_9.raw	Found in Sample: [S1] F1: 126, Control	Found in Sample: [S2] F1: 127N, Sample	Found in Sample: [S3] F1: 127C, Sample	Found in Sample: [S4] F1: 128N, Sample	Found in Sample: [S5] F1: 128C, Sample	Found in Sample: [S6] F1: 129N, Sample	Found in Sample: [S7] F1: 129C, Sample	Found in Sample: [S8] F1: 130N, Sample	Found in Sample: [S9] F1: 130C, Sample	Found in Sample: [S10] F1: 131, Sample	Found in Sample Group: F1, 126	Found in Sample Group: F1, 127N	Found in Sample Group: F1, 127C	Found in Sample Group: F1, 128N	Found in Sample Group: F1, 128C	Found in Sample Group: F1, 129N	Found in Sample Group: F1, 129C	Found in Sample Group: F1, 130N	Found in Sample Group: F1, 130C	Found in Sample Group: F1, 131
	3597	1	5	5	9	[Master Protein] GTP-binding protein Rheb OS=Mus musculus OX=10090 GN=Rheb PE=1 SV=1	High	Not Found	High	Not Found	Not Found	High	Not Found	Not Found	Not Found	High	High	Not Found	Not Found	Not Found	Not Found	Not Found	Not Found	High	High	High	High	High	High	High	High	High	High	High	High	High	High	High	High	High	High	High	High
	Checked	Confidence	Sequence	Modifications	Qvality PEP	Qvality q-value	# Protein Groups	# Proteins	# PSMs	Master Protein Accessions	# Missed Cleavages	Theo. MH+ [Da]	Mouse_Cell_661W_TMT_1_HpH_Fract_1.raw	Mouse_Cell_661W_TMT_1_HpH_Fract_10.raw	Mouse_Cell_661W_TMT_1_HpH_Fract_11.raw	Mouse_Cell_661W_TMT_1_HpH_Fract_12.raw	Mouse_Cell_661W_TMT_1_HpH_Fract_13.raw	Mouse_Cell_661W_TMT_1_HpH_Fract_14.raw	Mouse_Cell_661W_TMT_1_HpH_Fract_15.raw	Mouse_Cell_661W_TMT_1_HpH_Fract_16.raw	Mouse_Cell_661W_TMT_1_HpH_Fract_17.raw	Mouse_Cell_661W_TMT_1_HpH_Fract_2.raw	Mouse_Cell_661W_TMT_1_HpH_Fract_3.raw	Mouse_Cell_661W_TMT_1_HpH_Fract_4.raw	Mouse_Cell_661W_TMT_1_HpH_Fract_5.raw	Mouse_Cell_661W_TMT_1_HpH_Fract_6.raw	Mouse_Cell_661W_TMT_1_HpH_Fract_7.raw	Mouse_Cell_661W_TMT_1_HpH_Fract_8.raw	Mouse_Cell_661W_TMT_1_HpH_Fract_9.raw	Found in Sample: [S1] F1: 126, Control	Found in Sample: [S2] F1: 127N, Sample	Found in Sample: [S3] F1: 127C, Sample	Found in Sample: [S4] F1: 128N, Sample	Found in Sample: [S5] F1: 128C, Sample	Found in Sample: [S6] F1: 129N, Sample	Found in Sample: [S7] F1: 129C, Sample	Found in Sample: [S8] F1: 130N, Sample	Found in Sample: [S9] F1: 130C, Sample	Found in Sample: [S10] F1: 131, Sample	Found in Sample Group: F1, 126	Found in Sample Group: F1, 127N	Found in Sample Group: F1, 127C	Found in Sample Group: F1, 128N	Found in Sample Group: F1, 128C	Found in Sample Group: F1, 129N	Found in Sample Group: F1, 129C	Found in Sample Group: F1, 130N	Found in Sample Group: F1, 130C	Found in Sample Group: F1, 131
		High	ALAESWNAAFLESSAK	2xTMT6plex [N-Term; K16]	1.34238e-08	0	1	1	4	Q921J2	0	2153.16	High	Not Found	Not Found	Not Found	Not Found	High	Not Found	Not Found	Not Found	Not Found	Not Found	Not Found	Not Found	Not Found	Not Found	Not Found	Not Found	High	High	High	High	High	High	High	High	High	High	High	High	High	High	High	High	High	High	High	High
		High	IDGAASQGK	2xTMT6plex [N-Term; K9]	0.000188855	3.26555e-05	1	1	1	Q921J2	0	1304.76	Not Found	Not Found	Not Found	Not Found	Not Found	Not Found	Not Found	Not Found	Not Found	High	Not Found	Not Found	Not Found	Not Found	Not Found	Not Found	Not Found	High	High	High	High	High	High	High	High	High	High	High	High	High	High	High	High	High	High	High	High
		High	VQIPIMLVGNK	2xTMT6plex [N-Term; K11]	0.00164878	0.000282382	1	1	1	Q921J2	0	1670.04	Not Found	Not Found	Not Found	Not Found	Not Found	High	Not Found	Not Found	Not Found	Not Found	Not Found	Not Found	Not Found	Not Found	Not Found	Not Found	Not Found	High	High	High	High	High	High	High	High	High	High	High	High	High	High	High	High	High	High	High	High
		High	IILEAEK	2xTMT6plex [N-Term; K7]	0.00306791	0.00040345	1	1	1	Q921J2	0	1273.81	Not Found	Not Found	Not Found	Not Found	Not Found	Not Found	Not Found	Not Found	Not Found	Not Found	High	Not Found	Not Found	Not Found	Not Found	Not Found	Not Found	High	High	High	High	High	High	High	High	High	High	High	High	High	High	High	High	High	High	High	High
		High	ENQTAVDVFK	2xTMT6plex [N-Term; K10]	0.0112395	0.00112456	1	1	2	Q921J2	0	1608.9	Not Found	Not Found	High	Not Found	Not Found	Not Found	Not Found	Not Found	Not Found	Not Found	Not Found	Not Found	Not Found	Not Found	Not Found	Not Found	Not Found	High	High	High	High	High	High	High	High	High	High	High	High	High	High	High	High	High	High	High	High
High	Master Protein	Q8BH61	Coagulation factor XIII A chain OS=Mus musculus OX=10090 GN=F13a1 PE=1 SV=3	0.00561097	3.10952	1.36612	1	1	1	1	732	83.155	5.92	Not Found	Not Found	High	Not Found	Not Found	Not Found	Not Found	Not Found	Not Found	Not Found	Not Found	Not Found	Not Found	Not Found	Not Found	Not Found	Not Found	High	High	High	High	High	High	High	High	High	High	High	High	High	High	High	High	High	High	High
Checked	Protein Group ID	# Proteins	# Unique Peptides	# Peptides	# PSMs	Group Description	Mouse_Cell_661W_TMT_1_HpH_Fract_1.raw	Mouse_Cell_661W_TMT_1_HpH_Fract_10.raw	Mouse_Cell_661W_TMT_1_HpH_Fract_11.raw	Mouse_Cell_661W_TMT_1_HpH_Fract_12.raw	Mouse_Cell_661W_TMT_1_HpH_Fract_13.raw	Mouse_Cell_661W_TMT_1_HpH_Fract_14.raw	Mouse_Cell_661W_TMT_1_HpH_Fract_15.raw	Mouse_Cell_661W_TMT_1_HpH_Fract_16.raw	Mouse_Cell_661W_TMT_1_HpH_Fract_17.raw	Mouse_Cell_661W_TMT_1_HpH_Fract_2.raw	Mouse_Cell_661W_TMT_1_HpH_Fract_3.raw	Mouse_Cell_661W_TMT_1_HpH_Fract_4.raw	Mouse_Cell_661W_TMT_1_HpH_Fract_5.raw	Mouse_Cell_661W_TMT_1_HpH_Fract_6.raw	Mouse_Cell_661W_TMT_1_HpH_Fract_7.raw	Mouse_Cell_661W_TMT_1_HpH_Fract_8.raw	Mouse_Cell_661W_TMT_1_HpH_Fract_9.raw	Found in Sample: [S1] F1: 126, Control	Found in Sample: [S2] F1: 127N, Sample	Found in Sample: [S3] F1: 127C, Sample	Found in Sample: [S4] F1: 128N, Sample	Found in Sample: [S5] F1: 128C, Sample	Found in Sample: [S6] F1: 129N, Sample	Found in Sample: [S7] F1: 129C, Sample	Found in Sample: [S8] F1: 130N, Sample	Found in Sample: [S9] F1: 130C, Sample	Found in Sample: [S10] F1: 131, Sample	Found in Sample Group: F1, 126	Found in Sample Group: F1, 127N	Found in Sample Group: F1, 127C	Found in Sample Group: F1, 128N	Found in Sample Group: F1, 128C	Found in Sample Group: F1, 129N	Found in Sample Group: F1, 129C	Found in Sample Group: F1, 130N	Found in Sample Group: F1, 130C	Found in Sample Group: F1, 131
	3596	1	1	1	1	[Master Protein] Coagulation factor XIII A chain OS=Mus musculus OX=10090 GN=F13a1 PE=1 SV=3	Not Found	Not Found	High	Not Found	Not Found	Not Found	Not Found	Not Found	Not Found	Not Found	Not Found	Not Found	Not Found	Not Found	Not Found	Not Found	Not Found	High	High	High	High	High	High	High	High	High	High	High	High	High	High	High	High	High	High	High	High
	Checked	Confidence	Sequence	Modifications	Qvality PEP	Qvality q-value	# Protein Groups	# Proteins	# PSMs	Master Protein Accessions	# Missed Cleavages	Theo. MH+ [Da]	Mouse_Cell_661W_TMT_1_HpH_Fract_1.raw	Mouse_Cell_661W_TMT_1_HpH_Fract_10.raw	Mouse_Cell_661W_TMT_1_HpH_Fract_11.raw	Mouse_Cell_661W_TMT_1_HpH_Fract_12.raw	Mouse_Cell_661W_TMT_1_HpH_Fract_13.raw	Mouse_Cell_661W_TMT_1_HpH_Fract_14.raw	Mouse_Cell_661W_TMT_1_HpH_Fract_15.raw	Mouse_Cell_661W_TMT_1_HpH_Fract_16.raw	Mouse_Cell_661W_TMT_1_HpH_Fract_17.raw	Mouse_Cell_661W_TMT_1_HpH_Fract_2.raw	Mouse_Cell_661W_TMT_1_HpH_Fract_3.raw	Mouse_Cell_661W_TMT_1_HpH_Fract_4.raw	Mouse_Cell_661W_TMT_1_HpH_Fract_5.raw	Mouse_Cell_661W_TMT_1_HpH_Fract_6.raw	Mouse_Cell_661W_TMT_1_HpH_Fract_7.raw	Mouse_Cell_661W_TMT_1_HpH_Fract_8.raw	Mouse_Cell_661W_TMT_1_HpH_Fract_9.raw	Found in Sample: [S1] F1: 126, Control	Found in Sample: [S2] F1: 127N, Sample	Found in Sample: [S3] F1: 127C, Sample	Found in Sample: [S4] F1: 128N, Sample	Found in Sample: [S5] F1: 128C, Sample	Found in Sample: [S6] F1: 129N, Sample	Found in Sample: [S7] F1: 129C, Sample	Found in Sample: [S8] F1: 130N, Sample	Found in Sample: [S9] F1: 130C, Sample	Found in Sample: [S10] F1: 131, Sample	Found in Sample Group: F1, 126	Found in Sample Group: F1, 127N	Found in Sample Group: F1, 127C	Found in Sample Group: F1, 128N	Found in Sample Group: F1, 128C	Found in Sample Group: F1, 129N	Found in Sample Group: F1, 129C	Found in Sample Group: F1, 130N	Found in Sample Group: F1, 130C	Found in Sample Group: F1, 131
		High	GTYIPVPVVK	2xTMT6plex [N-Term; K10]	0.00128472	0.000215237	1	1	1	Q8BH61	0	1530.97	Not Found	Not Found	High	Not Found	Not Found	Not Found	Not Found	Not Found	Not Found	Not Found	Not Found	Not Found	Not Found	Not Found	Not Found	Not Found	Not Found	High	High	High	High	High	High	High	High	High	High	High	High	High	High	High	High	High	High	High	High
High	Master Protein	Q9QXS6	Drebrin OS=Mus musculus OX=10090 GN=Dbn1 PE=1 SV=4	0	40.9753	14.4476	6	16	6	1	706	77.239	4.49	High	Not Found	Not Found	Not Found	Not Found	Not Found	Not Found	Not Found	Not Found	High	High	High	Not Found	Not Found	High	High	Not Found	High	High	High	High	High	High	High	High	High	High	High	High	High	High	High	High	High	High	High
Checked	Protein Group ID	# Proteins	# Unique Peptides	# Peptides	# PSMs	Group Description	Mouse_Cell_661W_TMT_1_HpH_Fract_1.raw	Mouse_Cell_661W_TMT_1_HpH_Fract_10.raw	Mouse_Cell_661W_TMT_1_HpH_Fract_11.raw	Mouse_Cell_661W_TMT_1_HpH_Fract_12.raw	Mouse_Cell_661W_TMT_1_HpH_Fract_13.raw	Mouse_Cell_661W_TMT_1_HpH_Fract_14.raw	Mouse_Cell_661W_TMT_1_HpH_Fract_15.raw	Mouse_Cell_661W_TMT_1_HpH_Fract_16.raw	Mouse_Cell_661W_TMT_1_HpH_Fract_17.raw	Mouse_Cell_661W_TMT_1_HpH_Fract_2.raw	Mouse_Cell_661W_TMT_1_HpH_Fract_3.raw	Mouse_Cell_661W_TMT_1_HpH_Fract_4.raw	Mouse_Cell_661W_TMT_1_HpH_Fract_5.raw	Mouse_Cell_661W_TMT_1_HpH_Fract_6.raw	Mouse_Cell_661W_TMT_1_HpH_Fract_7.raw	Mouse_Cell_661W_TMT_1_HpH_Fract_8.raw	Mouse_Cell_661W_TMT_1_HpH_Fract_9.raw	Found in Sample: [S1] F1: 126, Control	Found in Sample: [S2] F1: 127N, Sample	Found in Sample: [S3] F1: 127C, Sample	Found in Sample: [S4] F1: 128N, Sample	Found in Sample: [S5] F1: 128C, Sample	Found in Sample: [S6] F1: 129N, Sample	Found in Sample: [S7] F1: 129C, Sample	Found in Sample: [S8] F1: 130N, Sample	Found in Sample: [S9] F1: 130C, Sample	Found in Sample: [S10] F1: 131, Sample	Found in Sample Group: F1, 126	Found in Sample Group: F1, 127N	Found in Sample Group: F1, 127C	Found in Sample Group: F1, 128N	Found in Sample Group: F1, 128C	Found in Sample Group: F1, 129N	Found in Sample Group: F1, 129C	Found in Sample Group: F1, 130N	Found in Sample Group: F1, 130C	Found in Sample Group: F1, 131
	3595	5	6	6	16	[Master Protein] Drebrin OS=Mus musculus OX=10090 GN=Dbn1 PE=1 SV=4	High	Not Found	Not Found	Not Found	Not Found	Not Found	Not Found	Not Found	Not Found	High	High	High	Not Found	Not Found	High	High	Not Found	High	High	High	High	High	High	High	High	High	High	High	High	High	High	High	High	High	High	High	High
	Checked	Confidence	Sequence	Modifications	Qvality PEP	Qvality q-value	# Protein Groups	# Proteins	# PSMs	Master Protein Accessions	# Missed Cleavages	Theo. MH+ [Da]	Mouse_Cell_661W_TMT_1_HpH_Fract_1.raw	Mouse_Cell_661W_TMT_1_HpH_Fract_10.raw	Mouse_Cell_661W_TMT_1_HpH_Fract_11.raw	Mouse_Cell_661W_TMT_1_HpH_Fract_12.raw	Mouse_Cell_661W_TMT_1_HpH_Fract_13.raw	Mouse_Cell_661W_TMT_1_HpH_Fract_14.raw	Mouse_Cell_661W_TMT_1_HpH_Fract_15.raw	Mouse_Cell_661W_TMT_1_HpH_Fract_16.raw	Mouse_Cell_661W_TMT_1_HpH_Fract_17.raw	Mouse_Cell_661W_TMT_1_HpH_Fract_2.raw	Mouse_Cell_661W_TMT_1_HpH_Fract_3.raw	Mouse_Cell_661W_TMT_1_HpH_Fract_4.raw	Mouse_Cell_661W_TMT_1_HpH_Fract_5.raw	Mouse_Cell_661W_TMT_1_HpH_Fract_6.raw	Mouse_Cell_661W_TMT_1_HpH_Fract_7.raw	Mouse_Cell_661W_TMT_1_HpH_Fract_8.raw	Mouse_Cell_661W_TMT_1_HpH_Fract_9.raw	Found in Sample: [S1] F1: 126, Control	Found in Sample: [S2] F1: 127N, Sample	Found in Sample: [S3] F1: 127C, Sample	Found in Sample: [S4] F1: 128N, Sample	Found in Sample: [S5] F1: 128C, Sample	Found in Sample: [S6] F1: 129N, Sample	Found in Sample: [S7] F1: 129C, Sample	Found in Sample: [S8] F1: 130N, Sample	Found in Sample: [S9] F1: 130C, Sample	Found in Sample: [S10] F1: 131, Sample	Found in Sample Group: F1, 126	Found in Sample Group: F1, 127N	Found in Sample Group: F1, 127C	Found in Sample Group: F1, 128N	Found in Sample Group: F1, 128C	Found in Sample Group: F1, 129N	Found in Sample Group: F1, 129C	Found in Sample Group: F1, 130N	Found in Sample Group: F1, 130C	Found in Sample Group: F1, 131
		High	LELLAAYEEVIR	1xTMT6plex [N-Term]	1.55525e-05	0	1	4	5	Q9QXS6	0	1647.95	Not Found	Not Found	Not Found	Not Found	Not Found	Not Found	Not Found	Not Found	Not Found	Not Found	Not Found	Not Found	Not Found	Not Found	High	High	Not Found	High	High	High	High	High	High	High	High	High	High	High	High	High	High	High	High	High	High	High	High
		High	EGTQASEGYFSQSQEEEFAQSEEPCAK	1xDeamidated [Q]; 1xCarbamidomethyl [C25]; 2xTMT6plex [N-Term; K27]	2.01573e-07	0	1	2	3	Q9QXS6	0	3512.57	Not Found	Not Found	Not Found	Not Found	Not Found	Not Found	Not Found	Not Found	Not Found	Not Found	Not Found	Not Found	Not Found	Not Found	High	Not Found	Not Found	High	High	High	High	High	High	High	High	High	High	High	High	High	High	High	High	High	High	High	High
		High	LAASGEGGLQELSGHFENQK	2xTMT6plex [N-Term; K20]	1.43821e-10	0	1	4	1	Q9QXS6	0	2530.33	Not Found	Not Found	Not Found	Not Found	Not Found	Not Found	Not Found	Not Found	Not Found	High	Not Found	Not Found	Not Found	Not Found	Not Found	Not Found	Not Found	High	High	High	High	High	High	High	High	High	High	High	High	High	High	High	High	High	High	High	High
		High	SESEVEEAAAIIAQRPDNPR	1xTMT6plex [N-Term]	6.01087e-10	0	1	4	2	Q9QXS6	0	2411.24	Not Found	Not Found	Not Found	Not Found	Not Found	Not Found	Not Found	Not Found	Not Found	Not Found	High	Not Found	Not Found	Not Found	Not Found	Not Found	Not Found	High	High	High	High	High	High	High	High	High	High	High	High	High	High	High	High	High	High	High	High
		High	YVLINWVGEDVPDAR	1xTMT6plex [N-Term]	0.000216033	3.26555e-05	1	5	4	Q9QXS6	0	1975.05	Not Found	Not Found	Not Found	Not Found	Not Found	Not Found	Not Found	Not Found	Not Found	Not Found	Not Found	High	Not Found	Not Found	Not Found	Not Found	Not Found	High	High	High	High	High	High	High	High	High	High	High	High	High	High	High	High	High	High	High	High
		High	EQFWEQAK	2xTMT6plex [N-Term; K8]	0.000522663	0.000122941	1	5	1	Q9QXS6	0	1523.83	High	Not Found	Not Found	Not Found	Not Found	Not Found	Not Found	Not Found	Not Found	Not Found	Not Found	Not Found	Not Found	Not Found	Not Found	Not Found	Not Found	High	High	High	High	High	High	High	High	High	High	High	High	High	High	High	High	High	High	High	High
High	Master Protein	Q9CQH8	Ribonuclease P protein subunit p14 OS=Mus musculus OX=10090 GN=Rpp14 PE=1 SV=1	0	8.04134	16.3934	1	1	1	1	122	13.556	8.28	High	Not Found	Not Found	Not Found	Not Found	Not Found	Not Found	Not Found	Not Found	Not Found	Not Found	Not Found	Not Found	Not Found	Not Found	Not Found	Not Found	High	High	High	High	High	High	High	High	High	High	High	High	High	High	High	High	High	High	High
Checked	Protein Group ID	# Proteins	# Unique Peptides	# Peptides	# PSMs	Group Description	Mouse_Cell_661W_TMT_1_HpH_Fract_1.raw	Mouse_Cell_661W_TMT_1_HpH_Fract_10.raw	Mouse_Cell_661W_TMT_1_HpH_Fract_11.raw	Mouse_Cell_661W_TMT_1_HpH_Fract_12.raw	Mouse_Cell_661W_TMT_1_HpH_Fract_13.raw	Mouse_Cell_661W_TMT_1_HpH_Fract_14.raw	Mouse_Cell_661W_TMT_1_HpH_Fract_15.raw	Mouse_Cell_661W_TMT_1_HpH_Fract_16.raw	Mouse_Cell_661W_TMT_1_HpH_Fract_17.raw	Mouse_Cell_661W_TMT_1_HpH_Fract_2.raw	Mouse_Cell_661W_TMT_1_HpH_Fract_3.raw	Mouse_Cell_661W_TMT_1_HpH_Fract_4.raw	Mouse_Cell_661W_TMT_1_HpH_Fract_5.raw	Mouse_Cell_661W_TMT_1_HpH_Fract_6.raw	Mouse_Cell_661W_TMT_1_HpH_Fract_7.raw	Mouse_Cell_661W_TMT_1_HpH_Fract_8.raw	Mouse_Cell_661W_TMT_1_HpH_Fract_9.raw	Found in Sample: [S1] F1: 126, Control	Found in Sample: [S2] F1: 127N, Sample	Found in Sample: [S3] F1: 127C, Sample	Found in Sample: [S4] F1: 128N, Sample	Found in Sample: [S5] F1: 128C, Sample	Found in Sample: [S6] F1: 129N, Sample	Found in Sample: [S7] F1: 129C, Sample	Found in Sample: [S8] F1: 130N, Sample	Found in Sample: [S9] F1: 130C, Sample	Found in Sample: [S10] F1: 131, Sample	Found in Sample Group: F1, 126	Found in Sample Group: F1, 127N	Found in Sample Group: F1, 127C	Found in Sample Group: F1, 128N	Found in Sample Group: F1, 128C	Found in Sample Group: F1, 129N	Found in Sample Group: F1, 129C	Found in Sample Group: F1, 130N	Found in Sample Group: F1, 130C	Found in Sample Group: F1, 131
	3593	1	1	1	1	[Master Protein] Ribonuclease P protein subunit p14 OS=Mus musculus OX=10090 GN=Rpp14 PE=1 SV=1	High	Not Found	Not Found	Not Found	Not Found	Not Found	Not Found	Not Found	Not Found	Not Found	Not Found	Not Found	Not Found	Not Found	Not Found	Not Found	Not Found	High	High	High	High	High	High	High	High	High	High	High	High	High	High	High	High	High	High	High	High
	Checked	Confidence	Sequence	Modifications	Qvality PEP	Qvality q-value	# Protein Groups	# Proteins	# PSMs	Master Protein Accessions	# Missed Cleavages	Theo. MH+ [Da]	Mouse_Cell_661W_TMT_1_HpH_Fract_1.raw	Mouse_Cell_661W_TMT_1_HpH_Fract_10.raw	Mouse_Cell_661W_TMT_1_HpH_Fract_11.raw	Mouse_Cell_661W_TMT_1_HpH_Fract_12.raw	Mouse_Cell_661W_TMT_1_HpH_Fract_13.raw	Mouse_Cell_661W_TMT_1_HpH_Fract_14.raw	Mouse_Cell_661W_TMT_1_HpH_Fract_15.raw	Mouse_Cell_661W_TMT_1_HpH_Fract_16.raw	Mouse_Cell_661W_TMT_1_HpH_Fract_17.raw	Mouse_Cell_661W_TMT_1_HpH_Fract_2.raw	Mouse_Cell_661W_TMT_1_HpH_Fract_3.raw	Mouse_Cell_661W_TMT_1_HpH_Fract_4.raw	Mouse_Cell_661W_TMT_1_HpH_Fract_5.raw	Mouse_Cell_661W_TMT_1_HpH_Fract_6.raw	Mouse_Cell_661W_TMT_1_HpH_Fract_7.raw	Mouse_Cell_661W_TMT_1_HpH_Fract_8.raw	Mouse_Cell_661W_TMT_1_HpH_Fract_9.raw	Found in Sample: [S1] F1: 126, Control	Found in Sample: [S2] F1: 127N, Sample	Found in Sample: [S3] F1: 127C, Sample	Found in Sample: [S4] F1: 128N, Sample	Found in Sample: [S5] F1: 128C, Sample	Found in Sample: [S6] F1: 129N, Sample	Found in Sample: [S7] F1: 129C, Sample	Found in Sample: [S8] F1: 130N, Sample	Found in Sample: [S9] F1: 130C, Sample	Found in Sample: [S10] F1: 131, Sample	Found in Sample Group: F1, 126	Found in Sample Group: F1, 127N	Found in Sample Group: F1, 127C	Found in Sample Group: F1, 128N	Found in Sample Group: F1, 128C	Found in Sample Group: F1, 129N	Found in Sample Group: F1, 129C	Found in Sample Group: F1, 130N	Found in Sample Group: F1, 130C	Found in Sample Group: F1, 131
		High	DLFGEVGAALPVDVLTYDEK	2xTMT6plex [N-Term; K20]	7.14921e-09	0	1	1	1	Q9CQH8	0	2609.41	High	Not Found	Not Found	Not Found	Not Found	Not Found	Not Found	Not Found	Not Found	Not Found	Not Found	Not Found	Not Found	Not Found	Not Found	Not Found	Not Found	High	High	High	High	High	High	High	High	High	High	High	High	High	High	High	High	High	High	High	High
High	Master Protein	Q6P1B1	Xaa-Pro aminopeptidase 1 OS=Mus musculus OX=10090 GN=Xpnpep1 PE=1 SV=1	0	154.969	40.931	18	73	18	1	623	69.547	5.54	High	High	High	High	High	High	Not Found	Not Found	Not Found	High	High	High	High	Not Found	High	High	High	High	High	High	High	High	High	High	High	High	High	High	High	High	High	High	High	High	High	High
Checked	Protein Group ID	# Proteins	# Unique Peptides	# Peptides	# PSMs	Group Description	Mouse_Cell_661W_TMT_1_HpH_Fract_1.raw	Mouse_Cell_661W_TMT_1_HpH_Fract_10.raw	Mouse_Cell_661W_TMT_1_HpH_Fract_11.raw	Mouse_Cell_661W_TMT_1_HpH_Fract_12.raw	Mouse_Cell_661W_TMT_1_HpH_Fract_13.raw	Mouse_Cell_661W_TMT_1_HpH_Fract_14.raw	Mouse_Cell_661W_TMT_1_HpH_Fract_15.raw	Mouse_Cell_661W_TMT_1_HpH_Fract_16.raw	Mouse_Cell_661W_TMT_1_HpH_Fract_17.raw	Mouse_Cell_661W_TMT_1_HpH_Fract_2.raw	Mouse_Cell_661W_TMT_1_HpH_Fract_3.raw	Mouse_Cell_661W_TMT_1_HpH_Fract_4.raw	Mouse_Cell_661W_TMT_1_HpH_Fract_5.raw	Mouse_Cell_661W_TMT_1_HpH_Fract_6.raw	Mouse_Cell_661W_TMT_1_HpH_Fract_7.raw	Mouse_Cell_661W_TMT_1_HpH_Fract_8.raw	Mouse_Cell_661W_TMT_1_HpH_Fract_9.raw	Found in Sample: [S1] F1: 126, Control	Found in Sample: [S2] F1: 127N, Sample	Found in Sample: [S3] F1: 127C, Sample	Found in Sample: [S4] F1: 128N, Sample	Found in Sample: [S5] F1: 128C, Sample	Found in Sample: [S6] F1: 129N, Sample	Found in Sample: [S7] F1: 129C, Sample	Found in Sample: [S8] F1: 130N, Sample	Found in Sample: [S9] F1: 130C, Sample	Found in Sample: [S10] F1: 131, Sample	Found in Sample Group: F1, 126	Found in Sample Group: F1, 127N	Found in Sample Group: F1, 127C	Found in Sample Group: F1, 128N	Found in Sample Group: F1, 128C	Found in Sample Group: F1, 129N	Found in Sample Group: F1, 129C	Found in Sample Group: F1, 130N	Found in Sample Group: F1, 130C	Found in Sample Group: F1, 131
	3592	5	18	18	73	[Master Protein] Xaa-Pro aminopeptidase 1 OS=Mus musculus OX=10090 GN=Xpnpep1 PE=1 SV=1	High	High	High	High	High	High	Not Found	Not Found	Not Found	High	High	High	High	Not Found	High	High	High	High	High	High	High	High	High	High	High	High	High	High	High	High	High	High	High	High	High	High	High
	Checked	Confidence	Sequence	Modifications	Qvality PEP	Qvality q-value	# Protein Groups	# Proteins	# PSMs	Master Protein Accessions	# Missed Cleavages	Theo. MH+ [Da]	Mouse_Cell_661W_TMT_1_HpH_Fract_1.raw	Mouse_Cell_661W_TMT_1_HpH_Fract_10.raw	Mouse_Cell_661W_TMT_1_HpH_Fract_11.raw	Mouse_Cell_661W_TMT_1_HpH_Fract_12.raw	Mouse_Cell_661W_TMT_1_HpH_Fract_13.raw	Mouse_Cell_661W_TMT_1_HpH_Fract_14.raw	Mouse_Cell_661W_TMT_1_HpH_Fract_15.raw	Mouse_Cell_661W_TMT_1_HpH_Fract_16.raw	Mouse_Cell_661W_TMT_1_HpH_Fract_17.raw	Mouse_Cell_661W_TMT_1_HpH_Fract_2.raw	Mouse_Cell_661W_TMT_1_HpH_Fract_3.raw	Mouse_Cell_661W_TMT_1_HpH_Fract_4.raw	Mouse_Cell_661W_TMT_1_HpH_Fract_5.raw	Mouse_Cell_661W_TMT_1_HpH_Fract_6.raw	Mouse_Cell_661W_TMT_1_HpH_Fract_7.raw	Mouse_Cell_661W_TMT_1_HpH_Fract_8.raw	Mouse_Cell_661W_TMT_1_HpH_Fract_9.raw	Found in Sample: [S1] F1: 126, Control	Found in Sample: [S2] F1: 127N, Sample	Found in Sample: [S3] F1: 127C, Sample	Found in Sample: [S4] F1: 128N, Sample	Found in Sample: [S5] F1: 128C, Sample	Found in Sample: [S6] F1: 129N, Sample	Found in Sample: [S7] F1: 129C, Sample	Found in Sample: [S8] F1: 130N, Sample	Found in Sample: [S9] F1: 130C, Sample	Found in Sample: [S10] F1: 131, Sample	Found in Sample Group: F1, 126	Found in Sample Group: F1, 127N	Found in Sample Group: F1, 127C	Found in Sample Group: F1, 128N	Found in Sample Group: F1, 128C	Found in Sample Group: F1, 129N	Found in Sample Group: F1, 129C	Found in Sample Group: F1, 130N	Found in Sample Group: F1, 130C	Found in Sample Group: F1, 131
		High	DTPTQEDWLVSVLPEGSR	1xTMT6plex [N-Term]	3.84431e-08	0	1	4	8	Q6P1B1	0	2258.15	Not Found	Not Found	Not Found	Not Found	Not Found	Not Found	Not Found	Not Found	Not Found	Not Found	Not Found	Not Found	Not Found	Not Found	Not Found	High	High	High	High	High	High	High	High	High	High	High	High	High	High	High	High	High	High	High	High	High	High
		High	MIDVNALTDK	2xTMT6plex [N-Term; K10]	8.13376e-06	0	1	3	1	Q6P1B1	0	1577.9	Not Found	Not Found	Not Found	Not Found	Not Found	Not Found	Not Found	Not Found	Not Found	Not Found	Not Found	Not Found	Not Found	Not Found	Not Found	Not Found	High	High	High	High	High	High	High	High	High	High	High	High	High	High	High	High	High	High	High	High	High
		High	GSLTFEPLTLVPIQTK	2xTMT6plex [N-Term; K16]	3.22408e-05	0	1	3	3	Q6P1B1	0	2202.31	Not Found	Not Found	High	Not Found	Not Found	Not Found	Not Found	Not Found	Not Found	Not Found	Not Found	Not Found	Not Found	Not Found	Not Found	Not Found	Not Found	High	High	High	High	High	High	High	High	High	High	High	High	High	High	High	High	High	High	High	High
		High	TLSLDEVYLIDSGAQYK	2xTMT6plex [N-Term; K17]	9.829e-08	0	1	3	3	Q6P1B1	0	2373.3	Not Found	Not Found	Not Found	Not Found	Not Found	Not Found	Not Found	Not Found	Not Found	Not Found	Not Found	Not Found	High	Not Found	Not Found	Not Found	Not Found	High	High	High	High	High	High	High	High	High	High	High	High	High	High	High	High	High	High	High	High
		High	AFVSGFDGSAGTAIITEEHAAMWTDGR	1xTMT6plex [N-Term]	2.34933e-14	0	1	4	4	Q6P1B1	0	3026.45	Not Found	Not Found	Not Found	Not Found	Not Found	Not Found	Not Found	Not Found	Not Found	Not Found	Not Found	High	Not Found	Not Found	Not Found	Not Found	Not Found	High	High	High	High	High	High	High	High	High	High	High	High	High	High	High	High	High	High	High	High
		High	AFVSGFDGSAGTAIITEEHAAMWTDGR	1xOxidation [M22]; 1xTMT6plex [N-Term]	1.56616e-09	0	1	4	4	Q6P1B1	0	3042.45	Not Found	Not Found	Not Found	Not Found	Not Found	Not Found	Not Found	Not Found	Not Found	Not Found	Not Found	High	Not Found	Not Found	Not Found	Not Found	Not Found	High	High	High	High	High	High	High	High	High	High	High	High	High	High	High	High	High	High	High	High
		High	IENVVLVVPAK	2xTMT6plex [N-Term; K11]	6.42225e-05	0	1	3	4	Q6P1B1	0	1639.06	Not Found	Not Found	Not Found	Not Found	Not Found	Not Found	Not Found	Not Found	Not Found	Not Found	Not Found	Not Found	Not Found	Not Found	Not Found	High	High	High	High	High	High	High	High	High	High	High	High	High	High	High	High	High	High	High	High	High	High
		High	VGVDPLIIPTDYWK	2xTMT6plex [N-Term; K14]	0.000135458	0	1	3	4	Q6P1B1	0	2074.2	High	Not Found	Not Found	Not Found	Not Found	Not Found	Not Found	Not Found	Not Found	Not Found	Not Found	Not Found	Not Found	Not Found	Not Found	Not Found	Not Found	High	High	High	High	High	High	High	High	High	High	High	High	High	High	High	High	High	High	High	High
		High	TFSDEPLEAGMIVTDEPGYYEDGAFGIR	1xTMT6plex [N-Term]	1.47543e-08	0	1	3	2	Q6P1B1	0	3308.55	Not Found	Not Found	Not Found	Not Found	Not Found	Not Found	Not Found	Not Found	Not Found	High	Not Found	Not Found	Not Found	Not Found	Not Found	Not Found	Not Found	High	High	High	High	High	High	High	High	High	High	High	High	High	High	High	High	High	High	High	High
		High	TFSDEPLEAGMIVTDEPGYYEDGAFGIR	1xOxidation [M11]; 1xTMT6plex [N-Term]	2.13186e-11	0	1	3	4	Q6P1B1	0	3324.55	High	Not Found	Not Found	Not Found	Not Found	Not Found	Not Found	Not Found	Not Found	High	Not Found	Not Found	Not Found	Not Found	Not Found	Not Found	Not Found	High	High	High	High	High	High	High	High	High	High	High	High	High	High	High	High	High	High	High	High
		High	QQADFVDLSFPTISSTGPNGAIIHYAPVPETNR	1xTMT6plex [N-Term]	1.10055e-09	0	1	3	3	Q6P1B1	0	3771.92	Not Found	High	Not Found	Not Found	Not Found	Not Found	Not Found	Not Found	Not Found	Not Found	Not Found	Not Found	Not Found	Not Found	Not Found	Not Found	Not Found	High	High	High	High	High	High	High	High	High	High	High	High	High	High	High	High	High	High	High	High
		High	QQADFVDLSFPTISSTGPNGAIIHYAPVPETNR	1xGln->pyro-Glu [N-Term]; 1xDeamidated [N19]	0.000285614	3.26555e-05	1	3	2	Q6P1B1	0	3526.71	Not Found	Not Found	Not Found	Not Found	Not Found	Not Found	Not Found	Not Found	Not Found	Not Found	Not Found	High	Not Found	Not Found	Not Found	Not Found	Not Found	High	High	High	High	High	High	High	High	High	High	High	High	High	High	High	High	High	High	High	High
		High	NSAESDGMR	1xTMT6plex [N-Term]	0.000197122	3.26555e-05	1	3	5	Q6P1B1	0	1195.56	Not Found	Not Found	Not Found	Not Found	Not Found	Not Found	Not Found	Not Found	Not Found	High	Not Found	Not Found	Not Found	Not Found	Not Found	Not Found	Not Found	High	High	High	High	High	High	High	High	High	High	High	High	High	High	High	High	High	High	High	High
		High	TLSLDEVYLIDSGAQYK	1xDeamidated [Q15]; 2xTMT6plex [N-Term; K17]	0.000466849	9.38446e-05	1	3	2	Q6P1B1	0	2374.28	Not Found	Not Found	Not Found	Not Found	Not Found	Not Found	Not Found	Not Found	Not Found	Not Found	Not Found	Not Found	High	Not Found	Not Found	Not Found	Not Found	High	High	High	High	High	High	High	High	High	High	High	High	High	High	High	High	High	High	High	High
		High	ASYAVSEAIPK	2xTMT6plex [N-Term; K11]	0.000392719	9.38446e-05	1	3	2	Q6P1B1	0	1593.93	Not Found	Not Found	Not Found	Not Found	Not Found	Not Found	Not Found	Not Found	Not Found	Not Found	Not Found	Not Found	Not Found	Not Found	High	Not Found	Not Found	High	High	High	High	High	High	High	High	High	High	High	High	High	High	High	High	High	High	High	High
		High	GGVTEISAADK	2xTMT6plex [N-Term; K11]	0.000624474	0.000139833	1	3	1	Q6P1B1	0	1505.86	Not Found	Not Found	Not Found	Not Found	Not Found	Not Found	Not Found	Not Found	Not Found	Not Found	Not Found	Not Found	Not Found	Not Found	Not Found	Not Found	High	High	High	High	High	High	High	High	High	High	High	High	High	High	High	High	High	High	High	High	High
		High	DTPTQEDWLVSVLPEGSR		0.00117373	0.000215237	1	4	2	Q6P1B1	0	2028.99	Not Found	Not Found	Not Found	Not Found	High	Not Found	Not Found	Not Found	Not Found	Not Found	Not Found	Not Found	Not Found	Not Found	Not Found	Not Found	Not Found	High	High	High	High	High	High	High	High	High	High	High	High	High	High	High	High	High	High	High	High
		High	QEALEWLIR	1xTMT6plex [N-Term]	0.00153201	0.000282382	1	2	4	Q6P1B1	0	1386.79	Not Found	Not Found	Not Found	Not Found	Not Found	High	Not Found	Not Found	Not Found	Not Found	Not Found	Not Found	Not Found	Not Found	Not Found	Not Found	Not Found	High	High	High	High	High	High	High	High	High	High	High	High	High	High	High	High	High	High	High	High
		High	DTPTQEDWLVSVLPEGSR	1xDeamidated [Q5]; 1xTMT6plex [N-Term]	0.00319204	0.00040345	1	4	2	Q6P1B1	0	2259.13	Not Found	Not Found	Not Found	Not Found	Not Found	Not Found	Not Found	Not Found	Not Found	Not Found	Not Found	Not Found	Not Found	Not Found	Not Found	High	Not Found	High	High	High	High	High	High	High	High	High	High	High	High	High	High	High	High	High	High	High	High
		High	GSLTFEPLTLVPIQTK	1xDeamidated [Q14]; 2xTMT6plex [N-Term; K16]	0.00515085	0.000519722	1	3	1	Q6P1B1	0	2203.3	Not Found	Not Found	Not Found	High	Not Found	Not Found	Not Found	Not Found	Not Found	Not Found	Not Found	Not Found	Not Found	Not Found	Not Found	Not Found	Not Found	High	High	High	High	High	High	High	High	High	High	High	High	High	High	High	High	High	High	High	High
		High	SILSELK	2xTMT6plex [N-Term; K7]	0.00615218	0.000641692	1	4	1	Q6P1B1	0	1247.8	Not Found	Not Found	Not Found	Not Found	Not Found	Not Found	Not Found	Not Found	Not Found	Not Found	High	Not Found	Not Found	Not Found	Not Found	Not Found	Not Found	High	High	High	High	High	High	High	High	High	High	High	High	High	High	High	High	High	High	High	High
		High	SAGHHLVPVK	2xTMT6plex [N-Term; K10]	0.0109894	0.00110696	1	3	1	Q6P1B1	0	1502.92	Not Found	Not Found	Not Found	Not Found	Not Found	Not Found	Not Found	Not Found	Not Found	Not Found	Not Found	Not Found	High	Not Found	Not Found	Not Found	Not Found	High	High	High	High	High	High	High	High	High	High	High	High	High	High	High	High	High	High	High	High
		High	QQADFVDLSFPTISSTGPNGAIIHYAPVPETNR	3xDeamidated [Q1; Q2; N19]; 1xTMT6plex [N-Term]	0.0127753	0.00127462	1	1	1	Q6P1B1	0	3774.87	Not Found	High	Not Found	Not Found	Not Found	Not Found	Not Found	Not Found	Not Found	Not Found	Not Found	Not Found	Not Found	Not Found	Not Found	Not Found	Not Found	High	High	High	High	High	High	High	High	High	High	High	High	High	High	High	High	High	High	High	High
		High	DGTTDVTR	1xTMT6plex [N-Term]	0.013268	0.00133043	1	3	2	Q6P1B1	0	1093.57	Not Found	Not Found	Not Found	Not Found	Not Found	Not Found	Not Found	Not Found	Not Found	Not Found	Not Found	Not Found	Not Found	Not Found	High	Not Found	Not Found	High	High	High	High	High	High	High	High	High	High	High	High	High	High	High	High	High	High	High	High
		High	QQADFVDLSFPTISSTGPNGAIIHYAPVPETNR	2xDeamidated [N19; N32]; 1xTMT6plex [N-Term]	0.0249418	0.00227637	1	3	2	Q6P1B1	0	3773.89	Not Found	Not Found	Not Found	Not Found	Not Found	Not Found	Not Found	Not Found	Not Found	Not Found	Not Found	Not Found	High	Not Found	Not Found	Not Found	Not Found	High	High	High	High	High	High	High	High	High	High	High	High	High	High	High	High	High	High	High	High
		High	GHLLDSFAR	1xTMT6plex [N-Term]	0.027188	0.00248744	1	3	2	Q6P1B1	0	1244.69	Not Found	Not Found	Not Found	Not Found	Not Found	Not Found	Not Found	Not Found	Not Found	Not Found	Not Found	High	Not Found	Not Found	Not Found	Not Found	Not Found	High	High	High	High	High	High	High	High	High	High	High	High	High	High	High	High	High	High	High	High
		High	GSLTFEPLTLVPIQTK	1xTMT6plex [N-Term]	0.0498695	0.00449824	1	3	2	Q6P1B1	0	1973.15	Not Found	Not Found	High	Not Found	Not Found	Not Found	Not Found	Not Found	Not Found	Not Found	Not Found	Not Found	Not Found	Not Found	Not Found	Not Found	Not Found	High	High	High	High	High	High	High	High	High	High	High	High	High	High	High	High	High	High	High	High
		High	YFLQAAK	2xTMT6plex [N-Term; K7]	0.0540897	0.00475251	1	4	1	Q6P1B1	0	1298.79	Not Found	Not Found	Not Found	Not Found	High	Not Found	Not Found	Not Found	Not Found	Not Found	Not Found	Not Found	Not Found	Not Found	Not Found	Not Found	Not Found	High	High	High	High	High	High	High	High	High	High	High	High	High	High	High	High	High	High	High	High
High	Master Protein	D3Z2R5	Selenoprotein N OS=Mus musculus OX=10090 GN=Selenon PE=3 SV=2	0.00294049	4.57447	2.693	1	2	1	1	557	62.453	5.55	Not Found	Not Found	Not Found	Not Found	Not Found	Not Found	Not Found	Not Found	Not Found	Not Found	Not Found	Not Found	Not Found	Not Found	Not Found	Not Found	High	High	High	High	High	High	High	High	High	High	High	High	High	High	High	High	High	High	High	High
Checked	Protein Group ID	# Proteins	# Unique Peptides	# Peptides	# PSMs	Group Description	Mouse_Cell_661W_TMT_1_HpH_Fract_1.raw	Mouse_Cell_661W_TMT_1_HpH_Fract_10.raw	Mouse_Cell_661W_TMT_1_HpH_Fract_11.raw	Mouse_Cell_661W_TMT_1_HpH_Fract_12.raw	Mouse_Cell_661W_TMT_1_HpH_Fract_13.raw	Mouse_Cell_661W_TMT_1_HpH_Fract_14.raw	Mouse_Cell_661W_TMT_1_HpH_Fract_15.raw	Mouse_Cell_661W_TMT_1_HpH_Fract_16.raw	Mouse_Cell_661W_TMT_1_HpH_Fract_17.raw	Mouse_Cell_661W_TMT_1_HpH_Fract_2.raw	Mouse_Cell_661W_TMT_1_HpH_Fract_3.raw	Mouse_Cell_661W_TMT_1_HpH_Fract_4.raw	Mouse_Cell_661W_TMT_1_HpH_Fract_5.raw	Mouse_Cell_661W_TMT_1_HpH_Fract_6.raw	Mouse_Cell_661W_TMT_1_HpH_Fract_7.raw	Mouse_Cell_661W_TMT_1_HpH_Fract_8.raw	Mouse_Cell_661W_TMT_1_HpH_Fract_9.raw	Found in Sample: [S1] F1: 126, Control	Found in Sample: [S2] F1: 127N, Sample	Found in Sample: [S3] F1: 127C, Sample	Found in Sample: [S4] F1: 128N, Sample	Found in Sample: [S5] F1: 128C, Sample	Found in Sample: [S6] F1: 129N, Sample	Found in Sample: [S7] F1: 129C, Sample	Found in Sample: [S8] F1: 130N, Sample	Found in Sample: [S9] F1: 130C, Sample	Found in Sample: [S10] F1: 131, Sample	Found in Sample Group: F1, 126	Found in Sample Group: F1, 127N	Found in Sample Group: F1, 127C	Found in Sample Group: F1, 128N	Found in Sample Group: F1, 128C	Found in Sample Group: F1, 129N	Found in Sample Group: F1, 129C	Found in Sample Group: F1, 130N	Found in Sample Group: F1, 130C	Found in Sample Group: F1, 131
	3591	1	1	1	2	[Master Protein] Selenoprotein N OS=Mus musculus OX=10090 GN=Selenon PE=3 SV=2	Not Found	Not Found	Not Found	Not Found	Not Found	Not Found	Not Found	Not Found	Not Found	Not Found	Not Found	Not Found	Not Found	Not Found	Not Found	Not Found	High	High	High	High	High	High	High	High	High	High	High	High	High	High	High	High	High	High	High	High	High
	Checked	Confidence	Sequence	Modifications	Qvality PEP	Qvality q-value	# Protein Groups	# Proteins	# PSMs	Master Protein Accessions	# Missed Cleavages	Theo. MH+ [Da]	Mouse_Cell_661W_TMT_1_HpH_Fract_1.raw	Mouse_Cell_661W_TMT_1_HpH_Fract_10.raw	Mouse_Cell_661W_TMT_1_HpH_Fract_11.raw	Mouse_Cell_661W_TMT_1_HpH_Fract_12.raw	Mouse_Cell_661W_TMT_1_HpH_Fract_13.raw	Mouse_Cell_661W_TMT_1_HpH_Fract_14.raw	Mouse_Cell_661W_TMT_1_HpH_Fract_15.raw	Mouse_Cell_661W_TMT_1_HpH_Fract_16.raw	Mouse_Cell_661W_TMT_1_HpH_Fract_17.raw	Mouse_Cell_661W_TMT_1_HpH_Fract_2.raw	Mouse_Cell_661W_TMT_1_HpH_Fract_3.raw	Mouse_Cell_661W_TMT_1_HpH_Fract_4.raw	Mouse_Cell_661W_TMT_1_HpH_Fract_5.raw	Mouse_Cell_661W_TMT_1_HpH_Fract_6.raw	Mouse_Cell_661W_TMT_1_HpH_Fract_7.raw	Mouse_Cell_661W_TMT_1_HpH_Fract_8.raw	Mouse_Cell_661W_TMT_1_HpH_Fract_9.raw	Found in Sample: [S1] F1: 126, Control	Found in Sample: [S2] F1: 127N, Sample	Found in Sample: [S3] F1: 127C, Sample	Found in Sample: [S4] F1: 128N, Sample	Found in Sample: [S5] F1: 128C, Sample	Found in Sample: [S6] F1: 129N, Sample	Found in Sample: [S7] F1: 129C, Sample	Found in Sample: [S8] F1: 130N, Sample	Found in Sample: [S9] F1: 130C, Sample	Found in Sample: [S10] F1: 131, Sample	Found in Sample Group: F1, 126	Found in Sample Group: F1, 127N	Found in Sample Group: F1, 127C	Found in Sample Group: F1, 128N	Found in Sample Group: F1, 128C	Found in Sample Group: F1, 129N	Found in Sample Group: F1, 129C	Found in Sample Group: F1, 130N	Found in Sample Group: F1, 130C	Found in Sample Group: F1, 131
		High	LPSGEPLQFVFEEIK	2xTMT6plex [N-Term; K15]	3.45452e-05	0	1	1	2	D3Z2R5	0	2191.24	Not Found	Not Found	Not Found	Not Found	Not Found	Not Found	Not Found	Not Found	Not Found	Not Found	Not Found	Not Found	Not Found	Not Found	Not Found	Not Found	High	High	High	High	High	High	High	High	High	High	High	High	High	High	High	High	High	High	High	High	High
High	Master Protein	Q8CD76	Kinesin light chain 1 OS=Mus musculus OX=10090 GN=Klc1 PE=1 SV=1	0	74.3463	28.7338	16	24	13	1	616	69.452	5.96	High	High	Not Found	High	High	High	Not Found	Not Found	Not Found	High	High	High	High	High	High	Not Found	Not Found	High	High	High	High	High	High	High	High	High	High	High	High	High	High	High	High	High	High	High
Checked	Protein Group ID	# Proteins	# Unique Peptides	# Peptides	# PSMs	Group Description	Mouse_Cell_661W_TMT_1_HpH_Fract_1.raw	Mouse_Cell_661W_TMT_1_HpH_Fract_10.raw	Mouse_Cell_661W_TMT_1_HpH_Fract_11.raw	Mouse_Cell_661W_TMT_1_HpH_Fract_12.raw	Mouse_Cell_661W_TMT_1_HpH_Fract_13.raw	Mouse_Cell_661W_TMT_1_HpH_Fract_14.raw	Mouse_Cell_661W_TMT_1_HpH_Fract_15.raw	Mouse_Cell_661W_TMT_1_HpH_Fract_16.raw	Mouse_Cell_661W_TMT_1_HpH_Fract_17.raw	Mouse_Cell_661W_TMT_1_HpH_Fract_2.raw	Mouse_Cell_661W_TMT_1_HpH_Fract_3.raw	Mouse_Cell_661W_TMT_1_HpH_Fract_4.raw	Mouse_Cell_661W_TMT_1_HpH_Fract_5.raw	Mouse_Cell_661W_TMT_1_HpH_Fract_6.raw	Mouse_Cell_661W_TMT_1_HpH_Fract_7.raw	Mouse_Cell_661W_TMT_1_HpH_Fract_8.raw	Mouse_Cell_661W_TMT_1_HpH_Fract_9.raw	Found in Sample: [S1] F1: 126, Control	Found in Sample: [S2] F1: 127N, Sample	Found in Sample: [S3] F1: 127C, Sample	Found in Sample: [S4] F1: 128N, Sample	Found in Sample: [S5] F1: 128C, Sample	Found in Sample: [S6] F1: 129N, Sample	Found in Sample: [S7] F1: 129C, Sample	Found in Sample: [S8] F1: 130N, Sample	Found in Sample: [S9] F1: 130C, Sample	Found in Sample: [S10] F1: 131, Sample	Found in Sample Group: F1, 126	Found in Sample Group: F1, 127N	Found in Sample Group: F1, 127C	Found in Sample Group: F1, 128N	Found in Sample Group: F1, 128C	Found in Sample Group: F1, 129N	Found in Sample Group: F1, 129C	Found in Sample Group: F1, 130N	Found in Sample Group: F1, 130C	Found in Sample Group: F1, 131
	3590	6	13	16	29	[Master Protein] Kinesin light chain 1 OS=Mus musculus OX=10090 GN=Klc1 PE=1 SV=1	High	High	Not Found	High	High	High	Not Found	Not Found	Not Found	High	High	High	High	High	High	Not Found	Not Found	High	High	High	High	High	High	High	High	High	High	High	High	High	High	High	High	High	High	High	High
	Checked	Confidence	Sequence	Modifications	Qvality PEP	Qvality q-value	# Protein Groups	# Proteins	# PSMs	Master Protein Accessions	# Missed Cleavages	Theo. MH+ [Da]	Mouse_Cell_661W_TMT_1_HpH_Fract_1.raw	Mouse_Cell_661W_TMT_1_HpH_Fract_10.raw	Mouse_Cell_661W_TMT_1_HpH_Fract_11.raw	Mouse_Cell_661W_TMT_1_HpH_Fract_12.raw	Mouse_Cell_661W_TMT_1_HpH_Fract_13.raw	Mouse_Cell_661W_TMT_1_HpH_Fract_14.raw	Mouse_Cell_661W_TMT_1_HpH_Fract_15.raw	Mouse_Cell_661W_TMT_1_HpH_Fract_16.raw	Mouse_Cell_661W_TMT_1_HpH_Fract_17.raw	Mouse_Cell_661W_TMT_1_HpH_Fract_2.raw	Mouse_Cell_661W_TMT_1_HpH_Fract_3.raw	Mouse_Cell_661W_TMT_1_HpH_Fract_4.raw	Mouse_Cell_661W_TMT_1_HpH_Fract_5.raw	Mouse_Cell_661W_TMT_1_HpH_Fract_6.raw	Mouse_Cell_661W_TMT_1_HpH_Fract_7.raw	Mouse_Cell_661W_TMT_1_HpH_Fract_8.raw	Mouse_Cell_661W_TMT_1_HpH_Fract_9.raw	Found in Sample: [S1] F1: 126, Control	Found in Sample: [S2] F1: 127N, Sample	Found in Sample: [S3] F1: 127C, Sample	Found in Sample: [S4] F1: 128N, Sample	Found in Sample: [S5] F1: 128C, Sample	Found in Sample: [S6] F1: 129N, Sample	Found in Sample: [S7] F1: 129C, Sample	Found in Sample: [S8] F1: 130N, Sample	Found in Sample: [S9] F1: 130C, Sample	Found in Sample: [S10] F1: 131, Sample	Found in Sample Group: F1, 126	Found in Sample Group: F1, 127N	Found in Sample Group: F1, 127C	Found in Sample Group: F1, 128N	Found in Sample Group: F1, 128C	Found in Sample Group: F1, 129N	Found in Sample Group: F1, 129C	Found in Sample Group: F1, 130N	Found in Sample Group: F1, 130C	Found in Sample Group: F1, 131
		High	DAANLLNDALAIR	1xTMT6plex [N-Term]	1.47054e-09	0	1	5	4	Q8CD76	0	1598.91	Not Found	Not Found	Not Found	High	Not Found	Not Found	Not Found	Not Found	Not Found	Not Found	Not Found	Not Found	Not Found	Not Found	Not Found	Not Found	Not Found	High	High	High	High	High	High	High	High	High	High	High	High	High	High	High	High	High	High	High	High
		High	DHPAVAATLNNLAVLYGK	1xDeamidated [N]; 2xTMT6plex [N-Term; K18]	3.79618e-08	0	3	9	2	Q9DBS5; Q8CD76; O88448	0	2326.32	Not Found	Not Found	Not Found	High	Not Found	Not Found	Not Found	Not Found	Not Found	Not Found	Not Found	Not Found	Not Found	Not Found	Not Found	Not Found	Not Found	High	High	High	High	High	High	High	High	High	High	High	High	High	High	High	High	High	High	High	High
		High	DHPAVAATLNNLAVLYGK	2xTMT6plex [N-Term; K18]	1.21686e-11	0	3	9	1	Q9DBS5; Q8CD76; O88448	0	2325.33	Not Found	Not Found	Not Found	High	Not Found	Not Found	Not Found	Not Found	Not Found	Not Found	Not Found	Not Found	Not Found	Not Found	Not Found	Not Found	Not Found	High	High	High	High	High	High	High	High	High	High	High	High	High	High	High	High	High	High	High	High
		High	QVIQGLEALK	2xTMT6plex [N-Term; K10]	3.99065e-05	0	1	5	2	Q8CD76	0	1556.98	Not Found	Not Found	Not Found	Not Found	Not Found	Not Found	Not Found	Not Found	Not Found	Not Found	Not Found	Not Found	High	Not Found	Not Found	Not Found	Not Found	High	High	High	High	High	High	High	High	High	High	High	High	High	High	High	High	High	High	High	High
		High	DGSAFGEYGGWYK	2xTMT6plex [N-Term; K13]	1.43871e-08	0	1	6	1	Q8CD76	0	1894.94	Not Found	Not Found	Not Found	Not Found	Not Found	Not Found	Not Found	Not Found	Not Found	Not Found	Not Found	Not Found	Not Found	High	Not Found	Not Found	Not Found	High	High	High	High	High	High	High	High	High	High	High	High	High	High	High	High	High	High	High	High
		High	VAEVLNDPESMEK	2xTMT6plex [N-Term; K13]	1.62207e-06	0	1	6	2	Q8CD76	0	1919.02	Not Found	Not Found	Not Found	Not Found	Not Found	Not Found	Not Found	Not Found	Not Found	Not Found	High	Not Found	Not Found	Not Found	Not Found	Not Found	Not Found	High	High	High	High	High	High	High	High	High	High	High	High	High	High	High	High	High	High	High	High
		High	LTQDEIISK	2xTMT6plex [N-Term; K9]	6.87907e-05	0	1	4	1	Q8CD76	0	1504.9	High	Not Found	Not Found	Not Found	Not Found	Not Found	Not Found	Not Found	Not Found	Not Found	Not Found	Not Found	Not Found	Not Found	Not Found	Not Found	Not Found	High	High	High	High	High	High	High	High	High	High	High	High	High	High	High	High	High	High	High	High
		High	NEHNSILQSLLETLK	2xTMT6plex [N-Term; K15]	0.000466849	9.38446e-05	1	5	1	Q8CD76	0	2197.26	Not Found	Not Found	Not Found	Not Found	Not Found	Not Found	Not Found	Not Found	Not Found	Not Found	Not Found	Not Found	Not Found	Not Found	High	Not Found	Not Found	High	High	High	High	High	High	High	High	High	High	High	High	High	High	High	High	High	High	High	High
		High	FEAAETLEEAAMR	1xOxidation [M12]; 1xTMT6plex [N-Term]	0.00304776	0.00040345	1	6	3	Q8CD76	0	1712.84	High	Not Found	Not Found	Not Found	Not Found	Not Found	Not Found	Not Found	Not Found	Not Found	Not Found	Not Found	Not Found	Not Found	Not Found	Not Found	Not Found	High	High	High	High	High	High	High	High	High	High	High	High	High	High	High	High	High	High	High	High
		High	SEQSVAQLEEEKK	3xTMT6plex [N-Term; K12; K13]	0.00619646	0.000641692	1	5	1	Q8CD76	1	2192.24	Not Found	Not Found	Not Found	Not Found	Not Found	Not Found	Not Found	Not Found	Not Found	Not Found	Not Found	High	Not Found	Not Found	Not Found	Not Found	Not Found	High	High	High	High	High	High	High	High	High	High	High	High	High	High	High	High	High	High	High	High
		High	YEEVEYYYQR	1xTMT6plex [N-Term]	0.0133689	0.00133043	1	5	4	Q8CD76	0	1670.79	Not Found	Not Found	Not Found	Not Found	Not Found	Not Found	Not Found	Not Found	Not Found	High	High	Not Found	Not Found	Not Found	Not Found	Not Found	Not Found	High	High	High	High	High	High	High	High	High	High	High	High	High	High	High	High	High	High	High	High
		High	QAETLYK	2xTMT6plex [N-Term; K7]	0.0236147	0.00224967	1	6	1	Q8CD76	0	1310.77	Not Found	Not Found	Not Found	Not Found	Not Found	Not Found	Not Found	Not Found	Not Found	High	Not Found	Not Found	Not Found	Not Found	Not Found	Not Found	Not Found	High	High	High	High	High	High	High	High	High	High	High	High	High	High	High	High	High	High	High	High
		High	ESLNMDVVK	2xTMT6plex [N-Term; K9]	0.0278368	0.00255863	1	6	1	Q8CD76	0	1492.84	Not Found	Not Found	Not Found	Not Found	Not Found	High	Not Found	Not Found	Not Found	Not Found	Not Found	Not Found	Not Found	Not Found	Not Found	Not Found	Not Found	High	High	High	High	High	High	High	High	High	High	High	High	High	High	High	High	High	High	High	High
		High	DELANTQQK	2xTMT6plex [N-Term; K9]	0.0291839	0.00267717	1	5	1	Q8CD76	0	1504.84	Not Found	Not Found	Not Found	Not Found	Not Found	Not Found	Not Found	Not Found	Not Found	Not Found	Not Found	High	Not Found	Not Found	Not Found	Not Found	Not Found	High	High	High	High	High	High	High	High	High	High	High	High	High	High	High	High	High	High	High	High
		High	ALGIYQTK	2xTMT6plex [N-Term; K8]	0.0515146	0.00457565	1	5	2	Q8CD76	0	1351.83	Not Found	High	Not Found	Not Found	Not Found	Not Found	Not Found	Not Found	Not Found	Not Found	Not Found	Not Found	Not Found	Not Found	Not Found	Not Found	Not Found	High	High	High	High	High	High	High	High	High	High	High	High	High	High	High	High	High	High	High	High
		High	QALEDLEK	2xTMT6plex [N-Term; K8]	0.0582074	0.00512825	2	8	1	Q8CD76; O88448	0	1403.81	Not Found	Not Found	Not Found	Not Found	Not Found	Not Found	Not Found	Not Found	Not Found	Not Found	Not Found	High	Not Found	Not Found	Not Found	Not Found	Not Found	High	High	High	High	High	High	High	High	High	High	High	High	High	High	High	High	High	High	High	High
		High	YEVAVPLCK	1xCarbamidomethyl [C8]; 2xTMT6plex [N-Term; K9]	0.0863282	0.00722939	3	8	1	Q9DBS5; Q8CD76; O88448	0	1536.89	Not Found	Not Found	Not Found	Not Found	High	Not Found	Not Found	Not Found	Not Found	Not Found	Not Found	Not Found	Not Found	Not Found	Not Found	Not Found	Not Found	High	High	High	High	High	High	High	High	High	High	High	High	High	High	High	High	High	High	High	High
High	Master Protein	Q9CZN7	Serine hydroxymethyltransferase, mitochondrial OS=Mus musculus OX=10090 GN=Shmt2 PE=1 SV=1	0	194.418	51.5873	20	91	19	1	504	55.724	8.47	High	High	High	High	High	Not Found	High	High	Not Found	High	High	High	High	High	High	High	High	High	High	High	High	High	High	High	High	High	High	High	High	High	High	High	High	High	High	High
Checked	Protein Group ID	# Proteins	# Unique Peptides	# Peptides	# PSMs	Group Description	Mouse_Cell_661W_TMT_1_HpH_Fract_1.raw	Mouse_Cell_661W_TMT_1_HpH_Fract_10.raw	Mouse_Cell_661W_TMT_1_HpH_Fract_11.raw	Mouse_Cell_661W_TMT_1_HpH_Fract_12.raw	Mouse_Cell_661W_TMT_1_HpH_Fract_13.raw	Mouse_Cell_661W_TMT_1_HpH_Fract_14.raw	Mouse_Cell_661W_TMT_1_HpH_Fract_15.raw	Mouse_Cell_661W_TMT_1_HpH_Fract_16.raw	Mouse_Cell_661W_TMT_1_HpH_Fract_17.raw	Mouse_Cell_661W_TMT_1_HpH_Fract_2.raw	Mouse_Cell_661W_TMT_1_HpH_Fract_3.raw	Mouse_Cell_661W_TMT_1_HpH_Fract_4.raw	Mouse_Cell_661W_TMT_1_HpH_Fract_5.raw	Mouse_Cell_661W_TMT_1_HpH_Fract_6.raw	Mouse_Cell_661W_TMT_1_HpH_Fract_7.raw	Mouse_Cell_661W_TMT_1_HpH_Fract_8.raw	Mouse_Cell_661W_TMT_1_HpH_Fract_9.raw	Found in Sample: [S1] F1: 126, Control	Found in Sample: [S2] F1: 127N, Sample	Found in Sample: [S3] F1: 127C, Sample	Found in Sample: [S4] F1: 128N, Sample	Found in Sample: [S5] F1: 128C, Sample	Found in Sample: [S6] F1: 129N, Sample	Found in Sample: [S7] F1: 129C, Sample	Found in Sample: [S8] F1: 130N, Sample	Found in Sample: [S9] F1: 130C, Sample	Found in Sample: [S10] F1: 131, Sample	Found in Sample Group: F1, 126	Found in Sample Group: F1, 127N	Found in Sample Group: F1, 127C	Found in Sample Group: F1, 128N	Found in Sample Group: F1, 128C	Found in Sample Group: F1, 129N	Found in Sample Group: F1, 129C	Found in Sample Group: F1, 130N	Found in Sample Group: F1, 130C	Found in Sample Group: F1, 131
	3588	2	19	20	91	[Master Protein] Serine hydroxymethyltransferase, mitochondrial OS=Mus musculus OX=10090 GN=Shmt2 PE=1 SV=1	High	High	High	High	High	Not Found	High	High	Not Found	High	High	High	High	High	High	High	High	High	High	High	High	High	High	High	High	High	High	High	High	High	High	High	High	High	High	High	High
	Checked	Confidence	Sequence	Modifications	Qvality PEP	Qvality q-value	# Protein Groups	# Proteins	# PSMs	Master Protein Accessions	# Missed Cleavages	Theo. MH+ [Da]	Mouse_Cell_661W_TMT_1_HpH_Fract_1.raw	Mouse_Cell_661W_TMT_1_HpH_Fract_10.raw	Mouse_Cell_661W_TMT_1_HpH_Fract_11.raw	Mouse_Cell_661W_TMT_1_HpH_Fract_12.raw	Mouse_Cell_661W_TMT_1_HpH_Fract_13.raw	Mouse_Cell_661W_TMT_1_HpH_Fract_14.raw	Mouse_Cell_661W_TMT_1_HpH_Fract_15.raw	Mouse_Cell_661W_TMT_1_HpH_Fract_16.raw	Mouse_Cell_661W_TMT_1_HpH_Fract_17.raw	Mouse_Cell_661W_TMT_1_HpH_Fract_2.raw	Mouse_Cell_661W_TMT_1_HpH_Fract_3.raw	Mouse_Cell_661W_TMT_1_HpH_Fract_4.raw	Mouse_Cell_661W_TMT_1_HpH_Fract_5.raw	Mouse_Cell_661W_TMT_1_HpH_Fract_6.raw	Mouse_Cell_661W_TMT_1_HpH_Fract_7.raw	Mouse_Cell_661W_TMT_1_HpH_Fract_8.raw	Mouse_Cell_661W_TMT_1_HpH_Fract_9.raw	Found in Sample: [S1] F1: 126, Control	Found in Sample: [S2] F1: 127N, Sample	Found in Sample: [S3] F1: 127C, Sample	Found in Sample: [S4] F1: 128N, Sample	Found in Sample: [S5] F1: 128C, Sample	Found in Sample: [S6] F1: 129N, Sample	Found in Sample: [S7] F1: 129C, Sample	Found in Sample: [S8] F1: 130N, Sample	Found in Sample: [S9] F1: 130C, Sample	Found in Sample: [S10] F1: 131, Sample	Found in Sample Group: F1, 126	Found in Sample Group: F1, 127N	Found in Sample Group: F1, 127C	Found in Sample Group: F1, 128N	Found in Sample Group: F1, 128C	Found in Sample Group: F1, 129N	Found in Sample Group: F1, 129C	Found in Sample Group: F1, 130N	Found in Sample Group: F1, 130C	Found in Sample Group: F1, 131
		High	ISATSIFFESMPYK	2xTMT6plex [N-Term; K14]	8.18512e-06	0	2	5	5	Q9CZN7; P50431	0	2079.12	Not Found	Not Found	Not Found	High	Not Found	Not Found	Not Found	Not Found	Not Found	Not Found	Not Found	Not Found	Not Found	Not Found	Not Found	Not Found	Not Found	High	High	High	High	High	High	High	High	High	High	High	High	High	High	High	High	High	High	High	High
		High	ISATSIFFESMPYK	1xTMT6plex [N-Term]	0.000114607	0	2	5	2	Q9CZN7; P50431	0	1849.96	Not Found	Not Found	Not Found	High	Not Found	Not Found	Not Found	Not Found	Not Found	Not Found	Not Found	Not Found	Not Found	Not Found	Not Found	Not Found	Not Found	High	High	High	High	High	High	High	High	High	High	High	High	High	High	High	High	High	High	High	High
		High	VLELVSITANK	2xTMT6plex [N-Term; K11]	1.83987e-06	0	1	2	10	Q9CZN7	0	1645.03	Not Found	Not Found	High	High	Not Found	Not Found	Not Found	Not Found	Not Found	Not Found	Not Found	Not Found	Not Found	Not Found	Not Found	Not Found	Not Found	High	High	High	High	High	High	High	High	High	High	High	High	High	High	High	High	High	High	High	High
		High	LNPQTGLIDYDQLALTAR	1xTMT6plex [N-Term]	3.64323e-09	0	1	2	6	Q9CZN7	0	2231.22	Not Found	Not Found	Not Found	High	High	Not Found	Not Found	Not Found	Not Found	Not Found	Not Found	Not Found	Not Found	Not Found	Not Found	Not Found	Not Found	High	High	High	High	High	High	High	High	High	High	High	High	High	High	High	High	High	High	High	High
		High	VAQTQAGEAAGGWTGQESLSDSDPEMWELLQR	1xOxidation [M26]; 1xDeamidated [Q16]; 1xTMT6plex [N-Term]	3.43291e-05	0	1	2	1	Q9CZN7	0	3693.72	Not Found	Not Found	Not Found	Not Found	Not Found	Not Found	Not Found	Not Found	Not Found	Not Found	Not Found	High	Not Found	Not Found	Not Found	Not Found	Not Found	High	High	High	High	High	High	High	High	High	High	High	High	High	High	High	High	High	High	High	High
		High	VAQTQAGEAAGGWTGQESLSDSDPEMWELLQR	1xOxidation [M26]; 1xTMT6plex [N-Term]	1.86767e-11	0	1	2	1	Q9CZN7	0	3692.73	Not Found	Not Found	Not Found	Not Found	Not Found	Not Found	Not Found	Not Found	Not Found	Not Found	Not Found	Not Found	Not Found	High	Not Found	Not Found	Not Found	High	High	High	High	High	High	High	High	High	High	High	High	High	High	High	High	High	High	High	High
		High	VAQTQAGEAAGGWTGQESLSDSDPEMWELLQR	2xDeamidated [Q]; 1xTMT6plex [N-Term]	1.86642e-05	0	1	2	3	Q9CZN7	0	3678.71	Not Found	Not Found	Not Found	Not Found	Not Found	Not Found	Not Found	Not Found	Not Found	Not Found	Not Found	Not Found	Not Found	High	Not Found	Not Found	Not Found	High	High	High	High	High	High	High	High	High	High	High	High	High	High	High	High	High	High	High	High
		High	VAQTQAGEAAGGWTGQESLSDSDPEMWELLQR	1xDeamidated [Q16]; 1xTMT6plex [N-Term]	2.34316e-11	0	1	2	1	Q9CZN7	0	3677.72	Not Found	Not Found	Not Found	Not Found	Not Found	Not Found	Not Found	Not Found	Not Found	Not Found	Not Found	Not Found	Not Found	High	Not Found	Not Found	Not Found	High	High	High	High	High	High	High	High	High	High	High	High	High	High	High	High	High	High	High	High
		High	YYGGAEVVDEIELLCQR	1xCarbamidomethyl [C15]; 1xTMT6plex [N-Term]	5.25031e-09	0	1	2	3	Q9CZN7	0	2243.12	Not Found	Not Found	Not Found	Not Found	Not Found	Not Found	Not Found	Not Found	Not Found	Not Found	Not Found	Not Found	Not Found	Not Found	High	Not Found	Not Found	High	High	High	High	High	High	High	High	High	High	High	High	High	High	High	High	High	High	High	High
		High	GLELIASENFCSR	1xCarbamidomethyl [C11]; 1xTMT6plex [N-Term]	7.05969e-09	0	1	2	11	Q9CZN7	0	1724.88	Not Found	Not Found	Not Found	Not Found	Not Found	Not Found	Not Found	Not Found	Not Found	Not Found	Not Found	Not Found	Not Found	Not Found	High	High	Not Found	High	High	High	High	High	High	High	High	High	High	High	High	High	High	High	High	High	High	High	High
		High	NAQAMADALLK	2xTMT6plex [N-Term; K11]	2.45782e-08	0	1	2	2	Q9CZN7	0	1603.92	Not Found	Not Found	Not Found	Not Found	Not Found	Not Found	Not Found	Not Found	Not Found	High	Not Found	Not Found	Not Found	Not Found	Not Found	Not Found	Not Found	High	High	High	High	High	High	High	High	High	High	High	High	High	High	High	High	High	High	High	High
		High	AALEALGSCLNNK	1xCarbamidomethyl [C9]; 2xTMT6plex [N-Term; K13]	2.58487e-08	0	1	2	5	Q9CZN7	0	1819.01	Not Found	High	High	Not Found	Not Found	Not Found	Not Found	Not Found	Not Found	Not Found	Not Found	Not Found	Not Found	Not Found	Not Found	Not Found	Not Found	High	High	High	High	High	High	High	High	High	High	High	High	High	High	High	High	High	High	High	High
		High	VVDFIDEGVNIGLEVK	2xTMT6plex [N-Term; K16]	1.17994e-07	0	1	2	6	Q9CZN7	0	2204.26	High	Not Found	Not Found	Not Found	Not Found	Not Found	Not Found	Not Found	Not Found	High	Not Found	Not Found	Not Found	Not Found	Not Found	Not Found	Not Found	High	High	High	High	High	High	High	High	High	High	High	High	High	High	High	High	High	High	High	High
		High	YYGGAEVVDEIELLCQR	1xDeamidated [Q16]; 1xCarbamidomethyl [C15]; 1xTMT6plex [N-Term]	0.000198331	3.26555e-05	1	2	1	Q9CZN7	0	2244.11	Not Found	Not Found	Not Found	Not Found	Not Found	Not Found	Not Found	Not Found	Not Found	Not Found	Not Found	Not Found	Not Found	Not Found	Not Found	High	Not Found	High	High	High	High	High	High	High	High	High	High	High	High	High	High	High	High	High	High	High	High
		High	VVDFIDEGVNIGLEVK	1xTMT6plex [N-Term]	0.00036551	3.26555e-05	1	2	2	Q9CZN7	0	1975.09	Not Found	Not Found	Not Found	High	Not Found	Not Found	Not Found	Not Found	Not Found	Not Found	Not Found	Not Found	Not Found	Not Found	Not Found	Not Found	Not Found	High	High	High	High	High	High	High	High	High	High	High	High	High	High	High	High	High	High	High	High
		High	VVDFIDEGVNIGLEVK	1xDeamidated [N10]; 2xTMT6plex [N-Term; K16]	0.000367706	3.26555e-05	1	2	1	Q9CZN7	0	2205.24	High	Not Found	Not Found	Not Found	Not Found	Not Found	Not Found	Not Found	Not Found	Not Found	Not Found	Not Found	Not Found	Not Found	Not Found	Not Found	Not Found	High	High	High	High	High	High	High	High	High	High	High	High	High	High	High	High	High	High	High	High
		High	AHLLADMAHISGLVAAK	2xTMT6plex [N-Term; K17]	0.000268853	3.26555e-05	1	2	1	Q9CZN7	0	2176.27	Not Found	Not Found	Not Found	High	Not Found	Not Found	Not Found	Not Found	Not Found	Not Found	Not Found	Not Found	Not Found	Not Found	Not Found	Not Found	Not Found	High	High	High	High	High	High	High	High	High	High	High	High	High	High	High	High	High	High	High	High
		High	IMGLDLPDGGHLTHGYMSDVK	1xOxidation [M]; 2xTMT6plex [N-Term; K21]	0.000426949	9.38446e-05	1	2	2	Q9CZN7	0	2730.4	Not Found	High	Not Found	Not Found	Not Found	Not Found	Not Found	Not Found	Not Found	Not Found	Not Found	Not Found	Not Found	Not Found	Not Found	High	Not Found	High	High	High	High	High	High	High	High	High	High	High	High	High	High	High	High	High	High	High	High
		High	AALEALGSCLNNK	1xDeamidated [N11]; 1xCarbamidomethyl [C9]; 2xTMT6plex [N-Term; K13]	0.000628187	0.000139833	1	2	1	Q9CZN7	0	1820	Not Found	High	Not Found	Not Found	Not Found	Not Found	Not Found	Not Found	Not Found	Not Found	Not Found	Not Found	Not Found	Not Found	Not Found	Not Found	Not Found	High	High	High	High	High	High	High	High	High	High	High	High	High	High	High	High	High	High	High	High
		High	LIIAGTSAYAR	1xTMT6plex [N-Term]	0.000578144	0.000139833	1	2	1	Q9CZN7	0	1364.81	High	Not Found	Not Found	Not Found	Not Found	Not Found	Not Found	Not Found	Not Found	Not Found	Not Found	Not Found	Not Found	Not Found	Not Found	Not Found	Not Found	High	High	High	High	High	High	High	High	High	High	High	High	High	High	High	High	High	High	High	High
		High	ISATSIFFESMPYK	1xOxidation [M11]; 2xTMT6plex [N-Term; K14]	0.000592023	0.000139833	2	5	2	Q9CZN7; P50431	0	2095.12	Not Found	Not Found	Not Found	High	Not Found	Not Found	Not Found	Not Found	Not Found	Not Found	Not Found	Not Found	Not Found	Not Found	Not Found	Not Found	High	High	High	High	High	High	High	High	High	High	High	High	High	High	High	High	High	High	High	High	High
		High	QQVEQFAR	1xTMT6plex [N-Term]	0.00130034	0.000215237	1	2	2	Q9CZN7	0	1234.67	Not Found	Not Found	Not Found	High	High	Not Found	Not Found	Not Found	Not Found	Not Found	Not Found	Not Found	Not Found	Not Found	Not Found	Not Found	Not Found	High	High	High	High	High	High	High	High	High	High	High	High	High	High	High	High	High	High	High	High
		High	GLELIASENFCSR	1xDeamidated [N9]; 1xCarbamidomethyl [C11]; 1xTMT6plex [N-Term]	0.0011667	0.000215237	1	2	1	Q9CZN7	0	1725.87	Not Found	Not Found	Not Found	Not Found	Not Found	Not Found	Not Found	Not Found	Not Found	Not Found	Not Found	Not Found	Not Found	Not Found	High	Not Found	Not Found	High	High	High	High	High	High	High	High	High	High	High	High	High	High	High	High	High	High	High	High
		High	EIPYTFEDR	1xTMT6plex [N-Term]	0.00135659	0.000240044	1	2	2	Q9CZN7	0	1398.71	Not Found	Not Found	Not Found	Not Found	Not Found	Not Found	Not Found	Not Found	Not Found	Not Found	Not Found	High	Not Found	Not Found	Not Found	Not Found	Not Found	High	High	High	High	High	High	High	High	High	High	High	High	High	High	High	High	High	High	High	High
		High	VAQTQAGEAAGGWTGQESLSDSDPEMWELLQR	1xOxidation [M26]; 2xDeamidated [Q16; Q31]; 1xTMT6plex [N-Term]	0.00156035	0.000282382	1	2	1	Q9CZN7	0	3694.7	Not Found	Not Found	Not Found	Not Found	Not Found	Not Found	Not Found	Not Found	Not Found	Not Found	Not Found	Not Found	Not Found	High	Not Found	Not Found	Not Found	High	Not Found	High	High	High	High	High	High	High	High	High	Not Found	High	High	High	High	High	High	High	High
		High	NAQAMADALLK	1xOxidation [M5]; 2xTMT6plex [N-Term; K11]	0.00306791	0.00040345	1	2	1	Q9CZN7	0	1619.92	Not Found	Not Found	Not Found	Not Found	Not Found	Not Found	Not Found	Not Found	Not Found	High	Not Found	Not Found	Not Found	Not Found	Not Found	Not Found	Not Found	High	High	High	High	High	High	High	High	High	High	High	High	High	High	High	High	High	High	High	High
		High	GFPMPGFDER	1xTMT6plex [N-Term]	0.00387831	0.000417981	1	2	6	Q9CZN7	0	1381.68	Not Found	Not Found	Not Found	Not Found	Not Found	Not Found	Not Found	Not Found	Not Found	Not Found	Not Found	Not Found	High	High	Not Found	Not Found	Not Found	High	High	High	High	High	High	High	High	High	High	High	High	High	High	High	High	High	High	High	High
		High	AALEALGSCLNNK	1xCarbamidomethyl [C9]; 1xTMT6plex [N-Term]	0.00352812	0.000417981	1	2	2	Q9CZN7	0	1589.85	Not Found	High	Not Found	Not Found	Not Found	Not Found	Not Found	Not Found	Not Found	Not Found	Not Found	Not Found	Not Found	Not Found	Not Found	Not Found	Not Found	High	High	High	High	High	High	High	High	High	High	High	High	High	High	High	High	High	High	High	High
		High	NAQAMADALLK	1xTMT6plex [K11]	0.00589364	0.000602078	1	2	1	Q9CZN7	0	1374.76	High	Not Found	Not Found	Not Found	Not Found	Not Found	Not Found	Not Found	Not Found	Not Found	Not Found	Not Found	Not Found	Not Found	Not Found	Not Found	Not Found	High	High	High	High	High	High	High	High	High	High	High	High	High	High	High	High	High	High	High	High
		High	VLELVSITANK	1xTMT6plex [N-Term]	0.00610824	0.000641692	1	2	2	Q9CZN7	0	1415.87	Not Found	Not Found	High	Not Found	Not Found	Not Found	Not Found	Not Found	Not Found	Not Found	Not Found	Not Found	Not Found	Not Found	Not Found	Not Found	Not Found	High	High	High	High	High	High	High	High	High	High	High	High	High	High	High	High	High	High	High	High
		High	YSEGYPGK	2xTMT6plex [N-Term; K8]	0.0114095	0.00112456	1	2	2	Q9CZN7	0	1358.74	High	Not Found	Not Found	Not Found	Not Found	Not Found	Not Found	Not Found	Not Found	Not Found	Not Found	Not Found	Not Found	Not Found	Not Found	Not Found	Not Found	High	High	High	High	High	High	High	High	High	High	High	High	High	High	High	High	High	High	High	High
		High	EVCDEVR	1xCarbamidomethyl [C3]; 1xTMT6plex [N-Term]	0.0199058	0.00187523	1	2	1	Q9CZN7	0	1135.56	Not Found	Not Found	Not Found	Not Found	Not Found	Not Found	Not Found	High	Not Found	Not Found	Not Found	Not Found	Not Found	Not Found	Not Found	Not Found	Not Found	High	High	High	High	High	High	High	High	High	High	High	High	High	High	High	High	High	High	High	High
		High	IMGLDLPDGGHLTHGYMSDVK	2xOxidation [M2; M17]; 2xTMT6plex [N-Term; K21]	0.0228898	0.00214169	1	2	1	Q9CZN7	0	2746.39	Not Found	Not Found	Not Found	Not Found	Not Found	Not Found	Not Found	Not Found	Not Found	Not Found	Not Found	Not Found	Not Found	Not Found	High	Not Found	Not Found	High	High	High	High	High	High	High	High	High	High	High	High	High	High	High	High	High	High	High	High
		High	SAITPGGLR		0.0355799	0.00321115	1	2	1	Q9CZN7	0	871.5	Not Found	Not Found	Not Found	Not Found	Not Found	Not Found	Not Found	Not Found	Not Found	Not Found	Not Found	Not Found	High	Not Found	Not Found	Not Found	Not Found	High	High	High	High	High	High	High	High	High	High	High	High	High	High	High	High	High	High	High	High
		High	QACTPMFR	1xCarbamidomethyl [C3]; 1xTMT6plex [N-Term]	0.0385374	0.00353775	1	2	1	Q9CZN7	0	1239.62	Not Found	Not Found	Not Found	Not Found	Not Found	Not Found	Not Found	Not Found	Not Found	Not Found	High	Not Found	Not Found	Not Found	Not Found	Not Found	Not Found	High	High	High	High	High	High	High	High	High	High	High	High	High	High	High	High	High	High	High	High
		High	DPETSQR	1xTMT6plex [N-Term]	0.0658133	0.00563576	1	2	1	Q9CZN7	0	1061.54	Not Found	Not Found	Not Found	Not Found	Not Found	Not Found	High	Not Found	Not Found	Not Found	Not Found	Not Found	Not Found	Not Found	Not Found	Not Found	Not Found	High	High	High	High	High	High	High	High	High	High	High	High	High	High	High	High	High	High	High	High
High	Master Protein	Q9Z2I8	Succinate--CoA ligase [GDP-forming] subunit beta, mitochondrial OS=Mus musculus OX=10090 GN=Suclg2 PE=1 SV=3	0	86.4962	33.9492	11	28	11	1	433	46.811	7.02	Not Found	High	Not Found	High	High	High	Not Found	Not Found	Not Found	Not Found	High	Not Found	High	High	Not Found	Not Found	High	High	High	High	High	High	High	High	High	High	High	High	High	High	High	High	High	High	High	High
Checked	Protein Group ID	# Proteins	# Unique Peptides	# Peptides	# PSMs	Group Description	Mouse_Cell_661W_TMT_1_HpH_Fract_1.raw	Mouse_Cell_661W_TMT_1_HpH_Fract_10.raw	Mouse_Cell_661W_TMT_1_HpH_Fract_11.raw	Mouse_Cell_661W_TMT_1_HpH_Fract_12.raw	Mouse_Cell_661W_TMT_1_HpH_Fract_13.raw	Mouse_Cell_661W_TMT_1_HpH_Fract_14.raw	Mouse_Cell_661W_TMT_1_HpH_Fract_15.raw	Mouse_Cell_661W_TMT_1_HpH_Fract_16.raw	Mouse_Cell_661W_TMT_1_HpH_Fract_17.raw	Mouse_Cell_661W_TMT_1_HpH_Fract_2.raw	Mouse_Cell_661W_TMT_1_HpH_Fract_3.raw	Mouse_Cell_661W_TMT_1_HpH_Fract_4.raw	Mouse_Cell_661W_TMT_1_HpH_Fract_5.raw	Mouse_Cell_661W_TMT_1_HpH_Fract_6.raw	Mouse_Cell_661W_TMT_1_HpH_Fract_7.raw	Mouse_Cell_661W_TMT_1_HpH_Fract_8.raw	Mouse_Cell_661W_TMT_1_HpH_Fract_9.raw	Found in Sample: [S1] F1: 126, Control	Found in Sample: [S2] F1: 127N, Sample	Found in Sample: [S3] F1: 127C, Sample	Found in Sample: [S4] F1: 128N, Sample	Found in Sample: [S5] F1: 128C, Sample	Found in Sample: [S6] F1: 129N, Sample	Found in Sample: [S7] F1: 129C, Sample	Found in Sample: [S8] F1: 130N, Sample	Found in Sample: [S9] F1: 130C, Sample	Found in Sample: [S10] F1: 131, Sample	Found in Sample Group: F1, 126	Found in Sample Group: F1, 127N	Found in Sample Group: F1, 127C	Found in Sample Group: F1, 128N	Found in Sample Group: F1, 128C	Found in Sample Group: F1, 129N	Found in Sample Group: F1, 129C	Found in Sample Group: F1, 130N	Found in Sample Group: F1, 130C	Found in Sample Group: F1, 131
	3586	3	11	11	28	[Master Protein] Succinate--CoA ligase [GDP-forming] subunit beta, mitochondrial OS=Mus musculus OX=10090 GN=Suclg2 PE=1 SV=3	Not Found	High	Not Found	High	High	High	Not Found	Not Found	Not Found	Not Found	High	Not Found	High	High	Not Found	Not Found	High	High	High	High	High	High	High	High	High	High	High	High	High	High	High	High	High	High	High	High	High
	Checked	Confidence	Sequence	Modifications	Qvality PEP	Qvality q-value	# Protein Groups	# Proteins	# PSMs	Master Protein Accessions	# Missed Cleavages	Theo. MH+ [Da]	Mouse_Cell_661W_TMT_1_HpH_Fract_1.raw	Mouse_Cell_661W_TMT_1_HpH_Fract_10.raw	Mouse_Cell_661W_TMT_1_HpH_Fract_11.raw	Mouse_Cell_661W_TMT_1_HpH_Fract_12.raw	Mouse_Cell_661W_TMT_1_HpH_Fract_13.raw	Mouse_Cell_661W_TMT_1_HpH_Fract_14.raw	Mouse_Cell_661W_TMT_1_HpH_Fract_15.raw	Mouse_Cell_661W_TMT_1_HpH_Fract_16.raw	Mouse_Cell_661W_TMT_1_HpH_Fract_17.raw	Mouse_Cell_661W_TMT_1_HpH_Fract_2.raw	Mouse_Cell_661W_TMT_1_HpH_Fract_3.raw	Mouse_Cell_661W_TMT_1_HpH_Fract_4.raw	Mouse_Cell_661W_TMT_1_HpH_Fract_5.raw	Mouse_Cell_661W_TMT_1_HpH_Fract_6.raw	Mouse_Cell_661W_TMT_1_HpH_Fract_7.raw	Mouse_Cell_661W_TMT_1_HpH_Fract_8.raw	Mouse_Cell_661W_TMT_1_HpH_Fract_9.raw	Found in Sample: [S1] F1: 126, Control	Found in Sample: [S2] F1: 127N, Sample	Found in Sample: [S3] F1: 127C, Sample	Found in Sample: [S4] F1: 128N, Sample	Found in Sample: [S5] F1: 128C, Sample	Found in Sample: [S6] F1: 129N, Sample	Found in Sample: [S7] F1: 129C, Sample	Found in Sample: [S8] F1: 130N, Sample	Found in Sample: [S9] F1: 130C, Sample	Found in Sample: [S10] F1: 131, Sample	Found in Sample Group: F1, 126	Found in Sample Group: F1, 127N	Found in Sample Group: F1, 127C	Found in Sample Group: F1, 128N	Found in Sample Group: F1, 128C	Found in Sample Group: F1, 129N	Found in Sample Group: F1, 129C	Found in Sample Group: F1, 130N	Found in Sample Group: F1, 130C	Found in Sample Group: F1, 131
		High	VVGELAQQMIGYNLATK	2xTMT6plex [N-Term; K17]	7.26395e-08	0	1	3	1	Q9Z2I8	0	2293.3	Not Found	Not Found	Not Found	High	Not Found	Not Found	Not Found	Not Found	Not Found	Not Found	Not Found	Not Found	Not Found	Not Found	Not Found	Not Found	Not Found	High	High	High	High	High	High	High	High	High	High	High	High	High	High	High	High	High	High	High	High
		High	SHNGPVIVGSPQGGVDIEEVAASSPELIFK	2xDeamidated [N3; Q12]; 2xTMT6plex [N-Term; K30]	5.59174e-09	0	1	2	4	Q9Z2I8	0	3493.85	Not Found	Not Found	Not Found	Not Found	High	High	Not Found	Not Found	Not Found	Not Found	Not Found	Not Found	Not Found	Not Found	Not Found	Not Found	Not Found	High	High	High	High	High	High	High	High	High	High	High	High	High	High	High	High	High	High	High	High
		High	SHNGPVIVGSPQGGVDIEEVAASSPELIFK	2xTMT6plex [N-Term; K30]	9.72474e-15	0	1	2	2	Q9Z2I8	0	3491.88	Not Found	Not Found	Not Found	Not Found	Not Found	Not Found	Not Found	Not Found	Not Found	Not Found	High	Not Found	Not Found	Not Found	Not Found	Not Found	Not Found	High	High	High	High	High	High	High	High	High	High	High	High	High	High	High	High	High	High	High	High
		High	EQIDIFEGIK	2xTMT6plex [N-Term; K10]	3.81926e-05	0	1	2	4	Q9Z2I8	0	1649.95	Not Found	Not Found	Not Found	Not Found	Not Found	High	Not Found	Not Found	Not Found	Not Found	Not Found	Not Found	Not Found	Not Found	Not Found	Not Found	Not Found	High	High	High	High	High	High	High	High	High	High	High	High	High	High	High	High	High	High	High	High
		High	SSGLPITSAVDLEDAAK	2xTMT6plex [N-Term; K17]	1.38995e-07	0	1	2	1	Q9Z2I8	0	2132.19	Not Found	Not Found	Not Found	High	Not Found	Not Found	Not Found	Not Found	Not Found	Not Found	Not Found	Not Found	Not Found	Not Found	Not Found	Not Found	Not Found	High	High	High	High	High	High	High	High	High	High	High	High	High	High	High	High	High	High	High	High
		High	SSGLPITSAVDLEDAAK	1xTMT6plex [N-Term]	5.47037e-06	0	1	2	2	Q9Z2I8	0	1903.02	Not Found	Not Found	Not Found	Not Found	Not Found	Not Found	Not Found	Not Found	Not Found	Not Found	Not Found	Not Found	Not Found	Not Found	Not Found	Not Found	High	High	High	High	High	High	High	High	High	High	High	High	High	High	High	High	High	High	High	High	High
		High	ETYLAILMDR	1xTMT6plex [N-Term]	2.99011e-05	0	1	2	2	Q9Z2I8	0	1453.79	Not Found	High	Not Found	Not Found	Not Found	Not Found	Not Found	Not Found	Not Found	Not Found	Not Found	Not Found	Not Found	Not Found	Not Found	Not Found	Not Found	High	High	High	High	High	High	High	High	High	High	High	High	High	High	High	High	High	High	High	High
		High	MAENLGFLGSLK	2xTMT6plex [N-Term; K12]	0.000385739	6.50205e-05	1	2	2	Q9Z2I8	0	1738	Not Found	High	Not Found	Not Found	Not Found	Not Found	Not Found	Not Found	Not Found	Not Found	Not Found	Not Found	Not Found	Not Found	Not Found	Not Found	Not Found	High	High	High	High	High	High	High	High	High	High	High	High	High	High	High	High	High	High	High	High
		High	EAQVYEAFK	2xTMT6plex [N-Term; K9]	0.000532056	0.000122941	1	2	1	Q9Z2I8	0	1542.86	Not Found	Not Found	Not Found	Not Found	Not Found	High	Not Found	Not Found	Not Found	Not Found	Not Found	Not Found	Not Found	Not Found	Not Found	Not Found	Not Found	High	High	High	High	High	High	High	High	High	High	High	High	High	High	High	High	High	High	High	High
		High	VMVAEALDISR	1xTMT6plex [N-Term]	0.000654803	0.000139833	1	2	2	Q9Z2I8	0	1432.8	Not Found	Not Found	Not Found	Not Found	Not Found	Not Found	Not Found	Not Found	Not Found	Not Found	Not Found	Not Found	Not Found	High	Not Found	Not Found	Not Found	High	High	High	High	High	High	High	High	High	High	High	High	High	High	High	High	High	High	High	High
		High	DIFAMDDK	2xTMT6plex [N-Term; K8]	0.000870612	0.000139833	1	2	1	Q9Z2I8	0	1412.75	Not Found	High	Not Found	Not Found	Not Found	Not Found	Not Found	Not Found	Not Found	Not Found	Not Found	Not Found	Not Found	Not Found	Not Found	Not Found	Not Found	High	High	High	High	High	High	High	High	High	High	High	High	High	High	High	High	High	High	High	High
		High	EQIDIFEGIK	1xTMT6plex [N-Term]	0.00325624	0.00040345	1	2	2	Q9Z2I8	0	1420.79	Not Found	Not Found	Not Found	Not Found	Not Found	Not Found	Not Found	Not Found	Not Found	Not Found	Not Found	Not Found	Not Found	Not Found	Not Found	Not Found	High	High	High	High	High	High	High	High	High	High	High	High	High	High	High	High	High	High	High	High	High
		High	NQAADQITK	2xTMT6plex [N-Term; K9]	0.0427745	0.00383297	1	2	1	Q9Z2I8	0	1446.83	Not Found	Not Found	Not Found	High	Not Found	Not Found	Not Found	Not Found	Not Found	Not Found	Not Found	Not Found	Not Found	Not Found	Not Found	Not Found	Not Found	High	High	High	High	High	High	High	High	High	High	High	High	High	High	High	High	High	High	High	High
		High	LEGTNVQEAQNILK	1xDeamidated [Q/N]; 2xTMT6plex [N-Term; K14]	0.0968047	0.00819286	1	2	3	Q9Z2I8	0	2016.14	Not Found	Not Found	Not Found	Not Found	Not Found	Not Found	Not Found	Not Found	Not Found	Not Found	Not Found	Not Found	High	Not Found	Not Found	Not Found	Not Found	High	High	High	High	High	High	High	High	High	High	High	High	High	High	High	High	High	High	High	High
High	Master Protein	P33610	DNA primase large subunit OS=Mus musculus OX=10090 GN=Prim2 PE=1 SV=1	0	42.7891	15.2475	7	14	7	1	505	58.372	8.32	High	High	Not Found	High	Not Found	Not Found	Not Found	Not Found	Not Found	Not Found	High	Not Found	Not Found	Not Found	Not Found	Not Found	High	High	High	High	High	High	High	High	High	High	High	High	High	High	High	High	High	High	High	High
Checked	Protein Group ID	# Proteins	# Unique Peptides	# Peptides	# PSMs	Group Description	Mouse_Cell_661W_TMT_1_HpH_Fract_1.raw	Mouse_Cell_661W_TMT_1_HpH_Fract_10.raw	Mouse_Cell_661W_TMT_1_HpH_Fract_11.raw	Mouse_Cell_661W_TMT_1_HpH_Fract_12.raw	Mouse_Cell_661W_TMT_1_HpH_Fract_13.raw	Mouse_Cell_661W_TMT_1_HpH_Fract_14.raw	Mouse_Cell_661W_TMT_1_HpH_Fract_15.raw	Mouse_Cell_661W_TMT_1_HpH_Fract_16.raw	Mouse_Cell_661W_TMT_1_HpH_Fract_17.raw	Mouse_Cell_661W_TMT_1_HpH_Fract_2.raw	Mouse_Cell_661W_TMT_1_HpH_Fract_3.raw	Mouse_Cell_661W_TMT_1_HpH_Fract_4.raw	Mouse_Cell_661W_TMT_1_HpH_Fract_5.raw	Mouse_Cell_661W_TMT_1_HpH_Fract_6.raw	Mouse_Cell_661W_TMT_1_HpH_Fract_7.raw	Mouse_Cell_661W_TMT_1_HpH_Fract_8.raw	Mouse_Cell_661W_TMT_1_HpH_Fract_9.raw	Found in Sample: [S1] F1: 126, Control	Found in Sample: [S2] F1: 127N, Sample	Found in Sample: [S3] F1: 127C, Sample	Found in Sample: [S4] F1: 128N, Sample	Found in Sample: [S5] F1: 128C, Sample	Found in Sample: [S6] F1: 129N, Sample	Found in Sample: [S7] F1: 129C, Sample	Found in Sample: [S8] F1: 130N, Sample	Found in Sample: [S9] F1: 130C, Sample	Found in Sample: [S10] F1: 131, Sample	Found in Sample Group: F1, 126	Found in Sample Group: F1, 127N	Found in Sample Group: F1, 127C	Found in Sample Group: F1, 128N	Found in Sample Group: F1, 128C	Found in Sample Group: F1, 129N	Found in Sample Group: F1, 129C	Found in Sample Group: F1, 130N	Found in Sample Group: F1, 130C	Found in Sample Group: F1, 131
	3606	1	7	7	14	[Master Protein] DNA primase large subunit OS=Mus musculus OX=10090 GN=Prim2 PE=1 SV=1	High	High	Not Found	High	Not Found	Not Found	Not Found	Not Found	Not Found	Not Found	High	Not Found	Not Found	Not Found	Not Found	Not Found	High	High	High	High	High	High	High	High	High	High	High	High	High	High	High	High	High	High	High	High	High
	Checked	Confidence	Sequence	Modifications	Qvality PEP	Qvality q-value	# Protein Groups	# Proteins	# PSMs	Master Protein Accessions	# Missed Cleavages	Theo. MH+ [Da]	Mouse_Cell_661W_TMT_1_HpH_Fract_1.raw	Mouse_Cell_661W_TMT_1_HpH_Fract_10.raw	Mouse_Cell_661W_TMT_1_HpH_Fract_11.raw	Mouse_Cell_661W_TMT_1_HpH_Fract_12.raw	Mouse_Cell_661W_TMT_1_HpH_Fract_13.raw	Mouse_Cell_661W_TMT_1_HpH_Fract_14.raw	Mouse_Cell_661W_TMT_1_HpH_Fract_15.raw	Mouse_Cell_661W_TMT_1_HpH_Fract_16.raw	Mouse_Cell_661W_TMT_1_HpH_Fract_17.raw	Mouse_Cell_661W_TMT_1_HpH_Fract_2.raw	Mouse_Cell_661W_TMT_1_HpH_Fract_3.raw	Mouse_Cell_661W_TMT_1_HpH_Fract_4.raw	Mouse_Cell_661W_TMT_1_HpH_Fract_5.raw	Mouse_Cell_661W_TMT_1_HpH_Fract_6.raw	Mouse_Cell_661W_TMT_1_HpH_Fract_7.raw	Mouse_Cell_661W_TMT_1_HpH_Fract_8.raw	Mouse_Cell_661W_TMT_1_HpH_Fract_9.raw	Found in Sample: [S1] F1: 126, Control	Found in Sample: [S2] F1: 127N, Sample	Found in Sample: [S3] F1: 127C, Sample	Found in Sample: [S4] F1: 128N, Sample	Found in Sample: [S5] F1: 128C, Sample	Found in Sample: [S6] F1: 129N, Sample	Found in Sample: [S7] F1: 129C, Sample	Found in Sample: [S8] F1: 130N, Sample	Found in Sample: [S9] F1: 130C, Sample	Found in Sample: [S10] F1: 131, Sample	Found in Sample Group: F1, 126	Found in Sample Group: F1, 127N	Found in Sample Group: F1, 127C	Found in Sample Group: F1, 128N	Found in Sample Group: F1, 128C	Found in Sample Group: F1, 129N	Found in Sample Group: F1, 129C	Found in Sample Group: F1, 130N	Found in Sample Group: F1, 130C	Found in Sample Group: F1, 131
		High	AIENLGVSYVK	2xTMT6plex [N-Term; K11]	3.21297e-07	0	1	1	2	P33610	0	1650.98	High	Not Found	Not Found	Not Found	Not Found	Not Found	Not Found	Not Found	Not Found	Not Found	Not Found	Not Found	Not Found	Not Found	Not Found	Not Found	Not Found	High	High	High	High	High	High	High	High	High	High	High	High	High	High	High	High	High	High	High	High
		High	IPASGISQILDLVK	2xTMT6plex [N-Term; K14]	1.97799e-07	0	1	1	2	P33610	0	1912.19	Not Found	Not Found	Not Found	High	Not Found	Not Found	Not Found	Not Found	Not Found	Not Found	Not Found	Not Found	Not Found	Not Found	Not Found	Not Found	Not Found	High	High	High	High	High	High	High	High	High	High	High	High	High	High	High	High	High	High	High	High
		High	VPFADALDLFR	1xTMT6plex [N-Term]	2.38206e-06	0	1	1	2	P33610	0	1492.84	Not Found	Not Found	Not Found	Not Found	Not Found	Not Found	Not Found	Not Found	Not Found	Not Found	Not Found	Not Found	Not Found	Not Found	Not Found	Not Found	High	High	High	High	High	High	High	High	High	High	High	High	High	High	High	High	High	High	High	High	High
		High	ISLDQIDSLSTK	2xTMT6plex [N-Term; K12]	3.09379e-07	0	1	1	1	P33610	0	1778.03	Not Found	High	Not Found	Not Found	Not Found	Not Found	Not Found	Not Found	Not Found	Not Found	Not Found	Not Found	Not Found	Not Found	Not Found	Not Found	Not Found	High	High	High	High	High	High	High	High	High	High	High	High	High	High	High	High	High	High	High	High
		High	WFIQQEMDLLR	1xOxidation [M7]; 1xTMT6plex [N-Term]	0.00264046	0.000392305	1	1	2	P33610	0	1723.9	Not Found	Not Found	Not Found	Not Found	Not Found	Not Found	Not Found	Not Found	Not Found	Not Found	High	Not Found	Not Found	Not Found	Not Found	Not Found	Not Found	High	High	High	High	High	High	High	High	High	High	High	High	High	High	High	High	High	High	High	High
		High	DIVAIILNEFR	1xTMT6plex [N-Term]	0.00355191	0.000417981	1	1	2	P33610	0	1531.9	Not Found	Not Found	Not Found	High	Not Found	Not Found	Not Found	Not Found	Not Found	Not Found	Not Found	Not Found	Not Found	Not Found	Not Found	Not Found	Not Found	High	High	High	High	High	High	High	High	High	High	High	High	High	High	High	High	High	High	High	High
		High	ALALTAR	1xTMT6plex [N-Term]	0.029415	0.00267717	1	1	2	P33610	0	944.609	Not Found	Not Found	Not Found	High	Not Found	Not Found	Not Found	Not Found	Not Found	Not Found	Not Found	Not Found	Not Found	Not Found	Not Found	Not Found	Not Found	High	High	High	High	High	High	High	High	High	High	High	High	High	High	High	High	High	High	High	High
		High	IPASGISQILDLVK	1xDeamidated [Q8]; 1xTMT6plex [N-Term]	0.074452	0.00635434	1	1	1	P33610	0	1684.01	High	Not Found	Not Found	Not Found	Not Found	Not Found	Not Found	Not Found	Not Found	Not Found	Not Found	Not Found	Not Found	Not Found	Not Found	Not Found	Not Found	High	High	High	High	High	High	High	High	High	High	High	High	High	High	High	High	High	High	High	High
High	Master Protein	Q9CXW3	Calcyclin-binding protein OS=Mus musculus OX=10090 GN=Cacybp PE=1 SV=1	0	84.8109	47.1616	8	36	8	1	229	26.494	7.87	Not Found	High	High	High	High	High	Not Found	Not Found	Not Found	High	High	Not Found	High	Not Found	Not Found	Not Found	High	High	High	High	High	High	High	High	High	High	High	High	High	High	High	High	High	High	High	High
Checked	Protein Group ID	# Proteins	# Unique Peptides	# Peptides	# PSMs	Group Description	Mouse_Cell_661W_TMT_1_HpH_Fract_1.raw	Mouse_Cell_661W_TMT_1_HpH_Fract_10.raw	Mouse_Cell_661W_TMT_1_HpH_Fract_11.raw	Mouse_Cell_661W_TMT_1_HpH_Fract_12.raw	Mouse_Cell_661W_TMT_1_HpH_Fract_13.raw	Mouse_Cell_661W_TMT_1_HpH_Fract_14.raw	Mouse_Cell_661W_TMT_1_HpH_Fract_15.raw	Mouse_Cell_661W_TMT_1_HpH_Fract_16.raw	Mouse_Cell_661W_TMT_1_HpH_Fract_17.raw	Mouse_Cell_661W_TMT_1_HpH_Fract_2.raw	Mouse_Cell_661W_TMT_1_HpH_Fract_3.raw	Mouse_Cell_661W_TMT_1_HpH_Fract_4.raw	Mouse_Cell_661W_TMT_1_HpH_Fract_5.raw	Mouse_Cell_661W_TMT_1_HpH_Fract_6.raw	Mouse_Cell_661W_TMT_1_HpH_Fract_7.raw	Mouse_Cell_661W_TMT_1_HpH_Fract_8.raw	Mouse_Cell_661W_TMT_1_HpH_Fract_9.raw	Found in Sample: [S1] F1: 126, Control	Found in Sample: [S2] F1: 127N, Sample	Found in Sample: [S3] F1: 127C, Sample	Found in Sample: [S4] F1: 128N, Sample	Found in Sample: [S5] F1: 128C, Sample	Found in Sample: [S6] F1: 129N, Sample	Found in Sample: [S7] F1: 129C, Sample	Found in Sample: [S8] F1: 130N, Sample	Found in Sample: [S9] F1: 130C, Sample	Found in Sample: [S10] F1: 131, Sample	Found in Sample Group: F1, 126	Found in Sample Group: F1, 127N	Found in Sample Group: F1, 127C	Found in Sample Group: F1, 128N	Found in Sample Group: F1, 128C	Found in Sample Group: F1, 129N	Found in Sample Group: F1, 129C	Found in Sample Group: F1, 130N	Found in Sample Group: F1, 130C	Found in Sample Group: F1, 131
	3607	2	8	8	36	[Master Protein] Calcyclin-binding protein OS=Mus musculus OX=10090 GN=Cacybp PE=1 SV=1	Not Found	High	High	High	High	High	Not Found	Not Found	Not Found	High	High	Not Found	High	Not Found	Not Found	Not Found	High	High	High	High	High	High	High	High	High	High	High	High	High	High	High	High	High	High	High	High	High
	Checked	Confidence	Sequence	Modifications	Qvality PEP	Qvality q-value	# Protein Groups	# Proteins	# PSMs	Master Protein Accessions	# Missed Cleavages	Theo. MH+ [Da]	Mouse_Cell_661W_TMT_1_HpH_Fract_1.raw	Mouse_Cell_661W_TMT_1_HpH_Fract_10.raw	Mouse_Cell_661W_TMT_1_HpH_Fract_11.raw	Mouse_Cell_661W_TMT_1_HpH_Fract_12.raw	Mouse_Cell_661W_TMT_1_HpH_Fract_13.raw	Mouse_Cell_661W_TMT_1_HpH_Fract_14.raw	Mouse_Cell_661W_TMT_1_HpH_Fract_15.raw	Mouse_Cell_661W_TMT_1_HpH_Fract_16.raw	Mouse_Cell_661W_TMT_1_HpH_Fract_17.raw	Mouse_Cell_661W_TMT_1_HpH_Fract_2.raw	Mouse_Cell_661W_TMT_1_HpH_Fract_3.raw	Mouse_Cell_661W_TMT_1_HpH_Fract_4.raw	Mouse_Cell_661W_TMT_1_HpH_Fract_5.raw	Mouse_Cell_661W_TMT_1_HpH_Fract_6.raw	Mouse_Cell_661W_TMT_1_HpH_Fract_7.raw	Mouse_Cell_661W_TMT_1_HpH_Fract_8.raw	Mouse_Cell_661W_TMT_1_HpH_Fract_9.raw	Found in Sample: [S1] F1: 126, Control	Found in Sample: [S2] F1: 127N, Sample	Found in Sample: [S3] F1: 127C, Sample	Found in Sample: [S4] F1: 128N, Sample	Found in Sample: [S5] F1: 128C, Sample	Found in Sample: [S6] F1: 129N, Sample	Found in Sample: [S7] F1: 129C, Sample	Found in Sample: [S8] F1: 130N, Sample	Found in Sample: [S9] F1: 130C, Sample	Found in Sample: [S10] F1: 131, Sample	Found in Sample Group: F1, 126	Found in Sample Group: F1, 127N	Found in Sample Group: F1, 127C	Found in Sample Group: F1, 128N	Found in Sample Group: F1, 128C	Found in Sample Group: F1, 129N	Found in Sample Group: F1, 129C	Found in Sample Group: F1, 130N	Found in Sample Group: F1, 130C	Found in Sample Group: F1, 131
		High	ISNYGWDQSDK	2xTMT6plex [N-Term; K11]	3.29497e-07	0	1	1	2	Q9CXW3	0	1770.91	Not Found	Not Found	Not Found	Not Found	Not Found	Not Found	Not Found	Not Found	Not Found	High	Not Found	Not Found	Not Found	Not Found	Not Found	Not Found	Not Found	High	High	High	High	High	High	High	High	High	High	High	High	High	High	High	High	High	High	High	High
		High	IYEDGDDDMKR	2xTMT6plex [N-Term; K10]	0.000136298	0	1	1	1	Q9CXW3	1	1814.9	Not Found	High	Not Found	Not Found	Not Found	Not Found	Not Found	Not Found	Not Found	Not Found	Not Found	Not Found	Not Found	Not Found	Not Found	Not Found	Not Found	High	High	High	High	High	High	High	High	High	High	High	High	High	High	High	High	High	High	High	High
		High	EKPSYDTEADPSEGLMNVLK	1xOxidation [M16]; 3xTMT6plex [N-Term; K2; K20]	5.61034e-08	0	1	1	4	Q9CXW3	0	2926.53	Not Found	Not Found	High	Not Found	Not Found	High	Not Found	Not Found	Not Found	Not Found	Not Found	Not Found	Not Found	Not Found	Not Found	Not Found	Not Found	High	High	High	High	High	High	High	High	High	High	High	High	High	High	High	High	High	High	High	High
		High	EKPSYDTEADPSEGLMNVLK	1xDeamidated [N17]; 3xTMT6plex [N-Term; K2; K20]	6.05026e-06	0	1	1	2	Q9CXW3	0	2911.52	Not Found	Not Found	Not Found	Not Found	Not Found	High	Not Found	Not Found	Not Found	Not Found	Not Found	Not Found	Not Found	Not Found	Not Found	Not Found	Not Found	High	High	High	High	High	High	High	High	High	High	High	High	High	High	High	High	High	High	High	High
		High	EKPSYDTEADPSEGLMNVLK	3xTMT6plex [N-Term; K2; K20]	2.8391e-12	0	1	1	5	Q9CXW3	0	2910.54	Not Found	Not Found	Not Found	Not Found	Not Found	High	Not Found	Not Found	Not Found	Not Found	Not Found	Not Found	Not Found	Not Found	Not Found	Not Found	Not Found	High	High	High	High	High	High	High	High	High	High	High	High	High	High	High	High	High	High	High	High
		High	EKPSYDTEADPSEGLMNVLK	2xTMT6plex [E/K]	4.82304e-08	0	1	1	3	Q9CXW3	0	2681.37	Not Found	Not Found	Not Found	High	Not Found	Not Found	Not Found	Not Found	Not Found	Not Found	Not Found	Not Found	Not Found	Not Found	Not Found	Not Found	High	High	High	High	High	High	High	High	High	High	High	High	High	High	High	High	High	High	High	High	High
		High	NYSMIVNNLLKPISVESSSK	1xDeamidated [N]; 3xTMT6plex [N-Term; K11; K20]	1.5667e-07	0	1	1	2	Q9CXW3	0	2911.64	Not Found	Not Found	Not Found	Not Found	High	Not Found	Not Found	Not Found	Not Found	Not Found	Not Found	Not Found	Not Found	Not Found	Not Found	Not Found	Not Found	High	High	High	High	High	High	High	High	High	High	High	High	High	High	High	High	High	High	High	High
		High	NYSMIVNNLLKPISVESSSK	1xOxidation [M4]; 3xTMT6plex [N-Term; K11; K20]	5.03191e-05	0	1	1	2	Q9CXW3	0	2926.65	Not Found	Not Found	Not Found	High	High	Not Found	Not Found	Not Found	Not Found	Not Found	Not Found	Not Found	Not Found	Not Found	Not Found	Not Found	Not Found	High	High	High	High	High	High	High	High	High	High	High	High	High	High	High	High	High	High	High	High
		High	NYSMIVNNLLKPISVESSSK	1xOxidation [M4]; 2xTMT6plex [K11; K20]	0.000358998	3.26555e-05	1	1	1	Q9CXW3	0	2697.49	Not Found	High	Not Found	Not Found	Not Found	Not Found	Not Found	Not Found	Not Found	Not Found	Not Found	Not Found	Not Found	Not Found	Not Found	Not Found	Not Found	High	High	High	High	High	High	High	High	High	High	High	High	High	High	High	High	High	High	High	High
		High	KPELDNEKPAAVVAPLTTGYTVK	3xTMT6plex [K8; K23; K]	0.00327797	0.00040345	1	2	2	Q9CXW3	0	3128.82	Not Found	Not Found	Not Found	Not Found	Not Found	Not Found	Not Found	Not Found	Not Found	Not Found	High	Not Found	Not Found	Not Found	Not Found	Not Found	Not Found	High	High	High	High	High	High	High	High	High	High	High	High	High	High	High	High	High	High	High	High
		High	SFDLLVK	2xTMT6plex [N-Term; K7]	0.00670732	0.000681113	1	2	6	Q9CXW3	0	1279.8	Not Found	Not Found	Not Found	Not Found	Not Found	Not Found	Not Found	Not Found	Not Found	Not Found	Not Found	Not Found	High	Not Found	Not Found	Not Found	Not Found	High	High	High	High	High	High	High	High	High	High	High	High	High	High	High	High	High	High	High	High
		High	DTLTSEK	2xTMT6plex [N-Term; K7]	0.0114095	0.00112456	1	2	1	Q9CXW3	0	1251.72	Not Found	Not Found	Not Found	Not Found	Not Found	Not Found	Not Found	Not Found	Not Found	Not Found	Not Found	Not Found	High	Not Found	Not Found	Not Found	Not Found	High	High	High	High	High	High	High	High	High	High	High	High	High	High	High	High	High	High	High	High
		High	EKPSYDTEADPSEGLMNVLK	1xOxidation [M16]; 1xDeamidated [N17]; 2xTMT6plex [N-Term; K2]	0.0169335	0.0016613	1	1	1	Q9CXW3	0	2698.35	Not Found	High	Not Found	Not Found	Not Found	Not Found	Not Found	Not Found	Not Found	Not Found	Not Found	Not Found	Not Found	Not Found	Not Found	Not Found	Not Found	High	High	High	High	High	High	High	High	High	High	High	High	High	High	High	High	High	High	High	High
		High	EKPSYDTEADPSEGLMNVLK	1xOxidation [M16]; 2xTMT6plex [N-Term; K20]	0.0239861	0.00226663	1	1	1	Q9CXW3	0	2697.37	Not Found	Not Found	Not Found	Not Found	Not Found	Not Found	Not Found	Not Found	Not Found	Not Found	Not Found	Not Found	Not Found	Not Found	Not Found	Not Found	High	High	High	High	High	High	High	High	High	High	High	High	High	High	High	High	High	High	High	High	High
		High	ISNYGWDQSDK	1xTMT6plex [N-Term]	0.0239861	0.00226663	1	1	2	Q9CXW3	0	1541.74	Not Found	Not Found	Not Found	High	Not Found	Not Found	Not Found	Not Found	Not Found	Not Found	Not Found	Not Found	Not Found	Not Found	Not Found	Not Found	Not Found	High	High	High	High	High	High	High	High	High	High	High	High	High	High	High	High	High	High	High	High
		High	ASVLEELQK	1xAcetyl [N-Term]	0.0410896	0.00371788	1	1	1	Q9CXW3	0	1058.57	Not Found	Not Found	Not Found	High	Not Found	Not Found	Not Found	Not Found	Not Found	Not Found	Not Found	Not Found	Not Found	Not Found	Not Found	Not Found	Not Found	High	High	High	High	High	High	High	High	High	High	High	High	High	High	High	High	High	High	High	High
High	Master Protein	B1AUR6	Protein MMS22-like OS=Mus musculus OX=10090 GN=Mms22l PE=1 SV=1	0.00259027	4.64436	0.726979	1	1	1	1	1238	140.492	7.11	Not Found	Not Found	Not Found	Not Found	Not Found	Not Found	Not Found	Not Found	Not Found	High	Not Found	Not Found	Not Found	Not Found	Not Found	Not Found	Not Found	High	High	High	High	High	High	High	High	High	High	High	High	High	High	High	High	High	High	High
Checked	Protein Group ID	# Proteins	# Unique Peptides	# Peptides	# PSMs	Group Description	Mouse_Cell_661W_TMT_1_HpH_Fract_1.raw	Mouse_Cell_661W_TMT_1_HpH_Fract_10.raw	Mouse_Cell_661W_TMT_1_HpH_Fract_11.raw	Mouse_Cell_661W_TMT_1_HpH_Fract_12.raw	Mouse_Cell_661W_TMT_1_HpH_Fract_13.raw	Mouse_Cell_661W_TMT_1_HpH_Fract_14.raw	Mouse_Cell_661W_TMT_1_HpH_Fract_15.raw	Mouse_Cell_661W_TMT_1_HpH_Fract_16.raw	Mouse_Cell_661W_TMT_1_HpH_Fract_17.raw	Mouse_Cell_661W_TMT_1_HpH_Fract_2.raw	Mouse_Cell_661W_TMT_1_HpH_Fract_3.raw	Mouse_Cell_661W_TMT_1_HpH_Fract_4.raw	Mouse_Cell_661W_TMT_1_HpH_Fract_5.raw	Mouse_Cell_661W_TMT_1_HpH_Fract_6.raw	Mouse_Cell_661W_TMT_1_HpH_Fract_7.raw	Mouse_Cell_661W_TMT_1_HpH_Fract_8.raw	Mouse_Cell_661W_TMT_1_HpH_Fract_9.raw	Found in Sample: [S1] F1: 126, Control	Found in Sample: [S2] F1: 127N, Sample	Found in Sample: [S3] F1: 127C, Sample	Found in Sample: [S4] F1: 128N, Sample	Found in Sample: [S5] F1: 128C, Sample	Found in Sample: [S6] F1: 129N, Sample	Found in Sample: [S7] F1: 129C, Sample	Found in Sample: [S8] F1: 130N, Sample	Found in Sample: [S9] F1: 130C, Sample	Found in Sample: [S10] F1: 131, Sample	Found in Sample Group: F1, 126	Found in Sample Group: F1, 127N	Found in Sample Group: F1, 127C	Found in Sample Group: F1, 128N	Found in Sample Group: F1, 128C	Found in Sample Group: F1, 129N	Found in Sample Group: F1, 129C	Found in Sample Group: F1, 130N	Found in Sample Group: F1, 130C	Found in Sample Group: F1, 131
	3608	5	1	1	1	[Master Protein] Protein MMS22-like OS=Mus musculus OX=10090 GN=Mms22l PE=1 SV=1	Not Found	Not Found	Not Found	Not Found	Not Found	Not Found	Not Found	Not Found	Not Found	High	Not Found	Not Found	Not Found	Not Found	Not Found	Not Found	Not Found	High	High	High	High	High	High	High	High	High	High	High	High	High	High	High	High	High	High	High	High
	Checked	Confidence	Sequence	Modifications	Qvality PEP	Qvality q-value	# Protein Groups	# Proteins	# PSMs	Master Protein Accessions	# Missed Cleavages	Theo. MH+ [Da]	Mouse_Cell_661W_TMT_1_HpH_Fract_1.raw	Mouse_Cell_661W_TMT_1_HpH_Fract_10.raw	Mouse_Cell_661W_TMT_1_HpH_Fract_11.raw	Mouse_Cell_661W_TMT_1_HpH_Fract_12.raw	Mouse_Cell_661W_TMT_1_HpH_Fract_13.raw	Mouse_Cell_661W_TMT_1_HpH_Fract_14.raw	Mouse_Cell_661W_TMT_1_HpH_Fract_15.raw	Mouse_Cell_661W_TMT_1_HpH_Fract_16.raw	Mouse_Cell_661W_TMT_1_HpH_Fract_17.raw	Mouse_Cell_661W_TMT_1_HpH_Fract_2.raw	Mouse_Cell_661W_TMT_1_HpH_Fract_3.raw	Mouse_Cell_661W_TMT_1_HpH_Fract_4.raw	Mouse_Cell_661W_TMT_1_HpH_Fract_5.raw	Mouse_Cell_661W_TMT_1_HpH_Fract_6.raw	Mouse_Cell_661W_TMT_1_HpH_Fract_7.raw	Mouse_Cell_661W_TMT_1_HpH_Fract_8.raw	Mouse_Cell_661W_TMT_1_HpH_Fract_9.raw	Found in Sample: [S1] F1: 126, Control	Found in Sample: [S2] F1: 127N, Sample	Found in Sample: [S3] F1: 127C, Sample	Found in Sample: [S4] F1: 128N, Sample	Found in Sample: [S5] F1: 128C, Sample	Found in Sample: [S6] F1: 129N, Sample	Found in Sample: [S7] F1: 129C, Sample	Found in Sample: [S8] F1: 130N, Sample	Found in Sample: [S9] F1: 130C, Sample	Found in Sample: [S10] F1: 131, Sample	Found in Sample Group: F1, 126	Found in Sample Group: F1, 127N	Found in Sample Group: F1, 127C	Found in Sample Group: F1, 128N	Found in Sample Group: F1, 128C	Found in Sample Group: F1, 129N	Found in Sample Group: F1, 129C	Found in Sample Group: F1, 130N	Found in Sample Group: F1, 130C	Found in Sample Group: F1, 131
		High	SSVSLTQAK	2xTMT6plex [N-Term; K9]	2.89769e-05	0	1	5	1	B1AUR6	0	1378.83	Not Found	Not Found	Not Found	Not Found	Not Found	Not Found	Not Found	Not Found	Not Found	High	Not Found	Not Found	Not Found	Not Found	Not Found	Not Found	Not Found	High	High	High	High	High	High	High	High	High	High	High	High	High	High	High	High	High	High	High	High
High	Master Protein	Q8R550	SH3 domain-containing kinase-binding protein 1 OS=Mus musculus OX=10090 GN=Sh3kbp1 PE=1 SV=1	0	100.889	24.4006	13	33	1	1	709	78.122	7.55	Not Found	High	High	High	Not Found	Not Found	Not Found	High	Not Found	High	High	High	High	High	High	High	Not Found	High	High	High	High	High	High	High	High	High	High	High	High	High	High	High	High	High	High	High
[truncated: 66,032 more rows]
[truncated: 38 more columns]

## Sheet: TMT2
Protein FDR Confidence	Master	Accession	Description	Exp. q-value	Sum PEP Score	Coverage	# Peptides	# PSMs	# Unique Peptides	# Protein Groups	# AAs	MW [kDa]	calc. pI	Mouse_Cell_661W_TMT_2_HpH_Fract_1.raw	Mouse_Cell_661W_TMT_2_HpH_Fract_10.raw	Mouse_Cell_661W_TMT_2_HpH_Fract_11.raw	Mouse_Cell_661W_TMT_2_HpH_Fract_12.raw	Mouse_Cell_661W_TMT_2_HpH_Fract_13.raw	Mouse_Cell_661W_TMT_2_HpH_Fract_14.raw	Mouse_Cell_661W_TMT_2_HpH_Fract_15.raw	Mouse_Cell_661W_TMT_2_HpH_Fract_16.raw	Mouse_Cell_661W_TMT_2_HpH_Fract_17.raw	Mouse_Cell_661W_TMT_2_HpH_Fract_2.raw	Mouse_Cell_661W_TMT_2_HpH_Fract_3.raw	Mouse_Cell_661W_TMT_2_HpH_Fract_4.raw	Mouse_Cell_661W_TMT_2_HpH_Fract_5.raw	Mouse_Cell_661W_TMT_2_HpH_Fract_6.raw	Mouse_Cell_661W_TMT_2_HpH_Fract_7.raw	Mouse_Cell_661W_TMT_2_HpH_Fract_8.raw	Mouse_Cell_661W_TMT_2_HpH_Fract_9.raw	Found in Sample: [S1] F1: 126, Control	Found in Sample: [S2] F1: 127N, Sample	Found in Sample: [S3] F1: 127C, Sample	Found in Sample: [S4] F1: 128N, Sample	Found in Sample: [S5] F1: 128C, Sample	Found in Sample: [S6] F1: 129N, Sample	Found in Sample: [S7] F1: 129C, Sample	Found in Sample: [S8] F1: 130N, Sample	Found in Sample: [S9] F1: 130C, Sample	Found in Sample: [S10] F1: 131, Sample	Found in Sample Group: F1, 126	Found in Sample Group: F1, 127N	Found in Sample Group: F1, 127C	Found in Sample Group: F1, 128N	Found in Sample Group: F1, 128C	Found in Sample Group: F1, 129N	Found in Sample Group: F1, 129C	Found in Sample Group: F1, 130N	Found in Sample Group: F1, 130C
[truncated: 70,535 more rows]
[truncated: 38 more columns]

[truncated: 1 more sheets: TMT3]
