# Supplementary material for: Oxidative Stress Induced Dysfunction of Protein Synthesis in 661W Mice Photoreceptor Cells
Source: Proteomes. 2023 Apr 3;11(2):12. doi: 10.3390/proteomes11020012 (PMC10123756; doi:10.3390/proteomes11020012)
Supplement: Supplementary file 1 [file proteomes-11-00012-s001.zip › Deng et al Supplementary Table 3 16feb23.xlsx]

## Sheet: Details
Differentially abundant proteins
p-value < 0.05 and absolute value of fold change > 1.2
Comp 1 = 10mM peroxide 0.5h vs control
Comp 2 = 50mM peroxide 6h vs control
Comp 3 = 50mM peroxide 12h vs control

## Sheet: Comp1
Accession	Description	Counts1.x	Counts1.y	Counts1	R1.127N	R2.127N	R3.127N	R1.126	R2.126	R3.126	Means.C1	Means.Control	FC	TwoSplTTest	TwoSplTTestAdj	Significant
Q9EQK5	Major vault protein OS=Mus musculus OX=10090 GN=Mvp PE=1 SV=4	31	25	32	4175.69	3910.05	3982.12	3033.04	2960.15	2908.58	4021.07	2966.82	1.35535	0.000190762	0.115665	TRUE
Q61838	Pregnancy zone protein OS=Mus musculus OX=10090 GN=Pzp PE=1 SV=3	3	2	2	919.619	907.956	947.475	755.005	751.889	655.987	924.869	719.448	1.28553	0.00631609	0.284901	TRUE
P07356	Annexin A2 OS=Mus musculus OX=10090 GN=Anxa2 PE=1 SV=2	20	15	20	5435.21	5495.11	4908.7	4344.96	3889.98	4623.03	5272.94	4275.17	1.23339	0.0276589	0.394455	TRUE
Q99PL5	Ribosome-binding protein 1 OS=Mus musculus OX=10090 GN=Rrbp1 PE=1 SV=2	33	28	34	6545.76	5549.77	5763.77	7478.63	7394.76	7487.09	5938.1	7453.38	0.796699	0.0105112	0.311204	TRUE
Q9Z1X4	Interleukin enhancer-binding factor 3 OS=Mus musculus OX=10090 GN=Ilf3 PE=1 SV=2	6	6	9	1352.76	1204.11	1311.53	1661.09	1707.55	1696.82	1287.92	1688.37	0.762818	0.0016379	0.220749	TRUE
P97493	Thioredoxin, mitochondrial OS=Mus musculus OX=10090 GN=Txn2 PE=1 SV=1	1	2	1	490.653	519.239	495.243	411.794	371.818	418.942	501.557	400.302	1.25294	0.00540397	0.284901	TRUE
O55176	E3 ubiquitin-protein ligase Praja-1 OS=Mus musculus OX=10090 GN=Pja1 PE=1 SV=3	1	1	1	98.7821	102.617	102.765	145.635	112.717	153.23	101.371	135.998	0.745387	0.0375049	0.405529	TRUE
Q80ZM5	H1 histone family, member X OS=Mus musculus OX=10090 GN=H1fx PE=1 SV=1	3	3	6	576.619	450.854	443.222	679.077	666.92	619.751	486.611	654.742	0.74321	0.0294692	0.394455	TRUE
Q9WV02	RNA-binding motif protein, X chromosome OS=Mus musculus OX=10090 GN=Rbmx PE=1 SV=1	3	2	1	152.674	145.756	150.498	183.981	194.549	169.396	149.615	182.348	0.820488	0.00960986	0.30601	TRUE
Q9CZT5	Vasorin OS=Mus musculus OX=10090 GN=Vasn PE=2 SV=2	5	6	6	510.446	503.198	544.406	652.981	695.886	640.639	519.044	662.751	0.783165	0.00216613	0.237934	TRUE
Q99020	Heterogeneous nuclear ribonucleoprotein A/B OS=Mus musculus OX=10090 GN=Hnrnpab PE=1 SV=1	11	10	9	2858.75	2648.16	2596.89	3208.43	3248.42	3455.17	2698.93	3302.26	0.817296	0.00560744	0.284901	TRUE
Q6R0H7	Guanine nucleotide-binding protein G(s) subunit alpha isoforms XLas OS=Mus musculus OX=10090 GN=Gnas PE=1 SV=1	15	15	14	3451.75	3421.03	3398.24	2729.72	2949.55	2860.99	3423.6	2845.31	1.20324	0.00129146	0.215817	TRUE
P14733	Lamin-B1 OS=Mus musculus OX=10090 GN=Lmnb1 PE=1 SV=3	1	6	4	496.949	521.673	499.676	654.728	654.777	599.103	505.979	635.651	0.796002	0.00238924	0.237934	TRUE
P01029	Complement C4-B OS=Mus musculus OX=10090 GN=C4b PE=1 SV=3	1	4	2	745.489	699.891	670.204	439.065	557.458	482.278	704.519	490.546	1.4362	0.00888806	0.300038	TRUE
Q8VEK3	Heterogeneous nuclear ribonucleoprotein U OS=Mus musculus OX=10090 GN=Hnrnpu PE=1 SV=1	14	9	19	2688.36	2645.62	2607.59	3371.09	3303.96	3422.19	2646.98	3365.4	0.786529	5.81232e-05	0.0961511	TRUE
O08583	THO complex subunit 4 OS=Mus musculus OX=10090 GN=Alyref PE=1 SV=3	1	4	4	473.406	421.362	427.028	525.753	538.12	525.278	439.995	529.684	0.830675	0.00787741	0.284901	TRUE
A0A0A6YVZ7	Protein lin-9 homolog OS=Mus musculus OX=10090 GN=Lin9 PE=1 SV=1	1	1	1	42.3791	41.6468	38.1907	34.4232	34.0454	31.262	40.6971	33.2131	1.22533	0.0101222	0.308324	TRUE
Q7TPV4	Myb-binding protein 1A OS=Mus musculus OX=10090 GN=Mybbp1a PE=1 SV=2	5	5	5	398.222	367.189	347.534	478.885	415.64	445.123	370.4	445.803	0.83086	0.0311607	0.395502	TRUE
Q9DBY1	E3 ubiquitin-protein ligase synoviolin OS=Mus musculus OX=10090 GN=Syvn1 PE=1 SV=3		1	1		39.1445	39.6164		47.5446	48.3611	39.3798	47.9511	0.821248	0.00278305	0.237934	TRUE
F7DBB3	AHNAK nucleoprotein 2 (Fragment) OS=Mus musculus OX=10090 GN=Ahnak2 PE=1 SV=1	8	9	10	1997.72	1851	1654.81	2275.17	2378.76	2087.72	1829.07	2243.94	0.815113	0.037595	0.405529	TRUE
Q61823	Programmed cell death protein 4 OS=Mus musculus OX=10090 GN=Pdcd4 PE=1 SV=1	7	3	6	1113.45	1351.41	1201.41	2806.1	2411.06	2276.66	1218.19	2488.11	0.489607	0.00105222	0.189562	TRUE
O35613	Death domain-associated protein 6 OS=Mus musculus OX=10090 GN=Daxx PE=1 SV=1	1	2	2	70.4348	67.2981	66.6	87.1478	84.6952	84.3406	68.0907	85.3855	0.797451	0.000349678	0.115665	TRUE
P67778	Prohibitin OS=Mus musculus OX=10090 GN=Phb PE=1 SV=1	14	11	9	3082.32	3199.39	3174.08	2478.94	2501.32	2624.64	3151.52	2534.17	1.24361	0.000490003	0.129377	TRUE
Q9CZG9	PDZ domain-containing protein 11 OS=Mus musculus OX=10090 GN=Pdzd11 PE=1 SV=1	2	1		127.843	131.047		158.842	158.473		129.435	158.657	0.815816	0.00370919	0.255283	TRUE
P60867	40S ribosomal protein S20 OS=Mus musculus OX=10090 GN=Rps20 PE=1 SV=1	3	3	4	628.455	557.321	627.607	738.761	736.6	705.335	603.517	726.737	0.830447	0.0119908	0.329799	TRUE
O88569	Heterogeneous nuclear ribonucleoproteins A2/B1 OS=Mus musculus OX=10090 GN=Hnrnpa2b1 PE=1 SV=2	7	11	9	3768.13	3144.41	3208.36	4066.5	4321.08	3938.7	3362.4	4105.71	0.818956	0.0344708	0.405529	TRUE
P23949	mRNA decay activator protein ZFP36L2 OS=Mus musculus OX=10090 GN=Zfp36l2 PE=1 SV=2	1	2	2	311.65	348.573	351.848	222.689	286.903	228.027	336.852	244.234	1.37921	0.0230842	0.38919	TRUE
P43274	Histone H1.4 OS=Mus musculus OX=10090 GN=Hist1h1e PE=1 SV=2	1	1	5	524.544	461.237	456.729	646.123	557.999	546.428	479.868	581.871	0.824698	0.0492537	0.437769	TRUE
Q8BP71	RNA binding protein fox-1 homolog 2 OS=Mus musculus OX=10090 GN=Rbfox2 PE=1 SV=2	1	2	2	224.055	192.126	206.088	243.261	278.965	243.085	207.013	254.562	0.813213	0.0316427	0.397358	TRUE
Q8BG81	Polymerase delta-interacting protein 3 OS=Mus musculus OX=10090 GN=Poldip3 PE=1 SV=1	1	1	2	50.4223	44.7605	40.6371	56.4888	63.507	59.8031	45.0969	59.8645	0.753316	0.016243	0.360793	TRUE
P18406	Protein CYR61 OS=Mus musculus OX=10090 GN=Cyr61 PE=1 SV=1	2	3	3	314.374	271.726	298.317	122.721	128.553	117.345	294.274	122.788	2.3966	6.34396e-05	0.0961511	TRUE
Q61398	Procollagen C-endopeptidase enhancer 1 OS=Mus musculus OX=10090 GN=Pcolce PE=1 SV=2	10	7	7	1172.12	1143.3	1206.82	1588.89	1445.17	1377.06	1173.8	1467.76	0.799719	0.00757257	0.284901	TRUE
Q9CWU4	UPF0690 protein C1orf52 homolog OS=Mus musculus OX=10090 PE=1 SV=1	2	1	2	208.798	249.85	182.603	126.62	94.1394	149.191	211.985	121.154	1.74971	0.0262252	0.394455	TRUE
Q59IW6	ABI gene family, member 3 (NESH)-binding protein OS=Mus musculus OX=10090 GN=Abi3bp PE=1 SV=1	6	6	6	691.818	620.781	659.101	795.105	794.808	789.433	656.59	793.111	0.827866	0.00385412	0.255283	TRUE
P21460	Cystatin-C OS=Mus musculus OX=10090 GN=Cst3 PE=1 SV=2	6	5	6	1026.69	1019.03	1017.13	1227.37	1245.68	1245.54	1020.94	1239.5	0.823674	4.40882e-06	0.0206509	TRUE
P47915	60S ribosomal protein L29 OS=Mus musculus OX=10090 GN=Rpl29 PE=1 SV=2	2	2	2	222.562	209.917	187.49	266.601	272.555	267.38	206.138	268.832	0.766792	0.00639773	0.284901	TRUE
Q9DB70	FUN14 domain-containing protein 1 OS=Mus musculus OX=10090 GN=Fundc1 PE=1 SV=1	1	1	2	24.0146	26.4255	24.6611	31.0716	29.2581	33.8206	25.0133	31.3278	0.798435	0.0114057	0.325759	TRUE
O08919	Numb-like protein OS=Mus musculus OX=10090 GN=Numbl PE=1 SV=3	1	2	2	252.805	262.277	269.337	155.188	170.186	191.744	261.385	171.725	1.52211	0.00277442	0.237934	TRUE
O35129	Prohibitin-2 OS=Mus musculus OX=10090 GN=Phb2 PE=1 SV=1	9	12	9	2265.15	2237.64	2128.89	1644.05	1770.66	1874.81	2209.77	1760.63	1.2551	0.00589743	0.284901	TRUE
Q3TFD2	Lysophosphatidylcholine acyltransferase 1 OS=Mus musculus OX=10090 GN=Lpcat1 PE=1 SV=1	1		3	118.605		126.979	165.403		155.523	122.721	160.387	0.765154	0.0282322	0.394455	TRUE
Q9QXY9	Peroxisomal biogenesis factor 3 OS=Mus musculus OX=10090 GN=Pex3 PE=1 SV=1	1		2	72.0215		69.1374	56.7592		60.47	70.5647	58.5852	1.20448	0.0386655	0.408482	TRUE
Q6ZPS6	Ankyrin repeat and IBR domain-containing protein 1 OS=Mus musculus OX=10090 GN=Ankib1 PE=1 SV=2	2		1	53.7248		52.1682	40.2814		42.0427	52.9408	41.1526	1.28645	0.0104561	0.311204	TRUE
Q6AW69	Cingulin-like protein 1 OS=Mus musculus OX=10090 GN=Cgnl1 PE=1 SV=2		1	3		184.677	182.028		115.897	133.055	183.348	124.18	1.47647	0.0302953	0.394455	TRUE
Q8C2E4	Pentatricopeptide repeat-containing protein 1, mitochondrial OS=Mus musculus OX=10090 GN=Ptcd1 PE=2 SV=2		1	1		36.5665	37.6845		44.4065	47.604	37.1213	45.9774	0.807381	0.0299532	0.394455	TRUE
Q62191	E3 ubiquitin-protein ligase TRIM21 OS=Mus musculus OX=10090 GN=Trim21 PE=1 SV=1		1	1		150.816	143.291		175.739	179.519	147.006	177.619	0.827648	0.0208001	0.380322	TRUE
Q9EPK2	Protein XRP2 OS=Mus musculus OX=10090 GN=Rp2 PE=1 SV=3		1	1		130.22	117.728		99.5669	94.5814	123.817	97.0421	1.27591	0.0499308	0.439616	TRUE
Q9DD24	Transcription elongation factor A protein-like 9 OS=Mus musculus OX=10090 GN=Tceal9 PE=3 SV=1		1	1		52.0412	48.7956		38.4411	40.1501	50.3923	39.2863	1.28269	0.0235016	0.38919	TRUE
B8JJN0	Uncharacterized protein OS=Mus musculus OX=10090 GN=Gm20547 PE=3 SV=1		2	1		374.558	384.035		308.488	291.976	379.267	300.119	1.26372	0.0162526	0.360793	TRUE
P63166	Small ubiquitin-related modifier 1 OS=Mus musculus OX=10090 GN=Sumo1 PE=1 SV=1		2	2		487.546	506.927		652.757	609.612	497.142	630.816	0.788094	0.0262426	0.394455	TRUE
Q8C6B2	Rhotekin OS=Mus musculus OX=10090 GN=Rtkn PE=1 SV=3	1	1		87.5353	82.8115		107.839	101.169		85.1406	104.451	0.815125	0.0402382	0.413242	TRUE
Q8C9B9	Death-inducer obliterator 1 OS=Mus musculus OX=10090 GN=Dido1 PE=1 SV=4	1	1		88.4695	76.2772		123.83	127.152		82.1475	125.48	0.654665	0.0301838	0.394455	TRUE
Q61805	Lipopolysaccharide-binding protein OS=Mus musculus OX=10090 GN=Lbp PE=1 SV=2	1	1		283.377	272.326		412.52	411.565		277.796	412.042	0.674194	0.00254404	0.237934	TRUE
Q71FD5	E3 ubiquitin-protein ligase ZNRF2 OS=Mus musculus OX=10090 GN=Znrf2 PE=1 SV=1	1	1		272.49	272.685		227.372	226.065		272.587	226.718	1.20232	0.000248677	0.115665	TRUE
Q9D9K3	Cell death regulator Aven OS=Mus musculus OX=10090 GN=Aven PE=1 SV=2	2	2		214.278	212.204		159.73	154.107		213.239	156.893	1.35913	0.00364176	0.255283	TRUE
P07141	Macrophage colony-stimulating factor 1 OS=Mus musculus OX=10090 GN=Csf1 PE=1 SV=2	1	2		33.3982	34.018		43.7941	47.9275		33.7067	45.8142	0.735726	0.0217574	0.381554	TRUE
Q9D2P4	Ubiquitin-related modifier 1 OS=Mus musculus OX=10090 GN=Urm1 PE=1 SV=1	1	1		127.028	125.282		102.172	105.605		126.152	103.874	1.21447	0.00839142	0.297768	TRUE

## Sheet: Comp2
Accession	Description	Counts1.x	Counts1.y	Counts1	R1.127C	R2.127C	R3.127C	R1.126	R2.126	R3.126	Means.C2	Means.Control	FC	TwoSplTTest	TwoSplTTestAdj	Significant
Q9EQK5	Major vault protein OS=Mus musculus OX=10090 GN=Mvp PE=1 SV=4	31	25	32	4605.69	4967.24	4574.99	3033.04	2960.15	2908.58	4712.67	2966.82	1.58846	9.06432e-05	0.0303266	TRUE
P97449	Aminopeptidase N OS=Mus musculus OX=10090 GN=Anpep PE=1 SV=4	6	3	4	405.433	398.171	389.8	298.089	326.883	326.846	397.75	316.977	1.25482	0.00227524	0.0666076	TRUE
Q8K0T4	Katanin p60 ATPase-containing subunit A-like 1 OS=Mus musculus OX=10090 GN=Katnal1 PE=1 SV=1	3	1	1	125.806	131.313	126.425	141.854	157.022	174.925	127.824	157.356	0.812325	0.0285018	0.175371	TRUE
Q61838	Pregnancy zone protein OS=Mus musculus OX=10090 GN=Pzp PE=1 SV=3	3	2	2	1035.9	999.494	1027.55	755.005	751.889	655.987	1020.86	719.448	1.41895	0.00180075	0.0607634	TRUE
P08775	DNA-directed RNA polymerase II subunit RPB1 OS=Mus musculus OX=10090 GN=Polr2a PE=1 SV=3	2	3	3	253.454	269.756	249.344	300.861	307.365	344.971	257.369	317.152	0.811501	0.0128342	0.127905	TRUE
P07356	Annexin A2 OS=Mus musculus OX=10090 GN=Anxa2 PE=1 SV=2	20	15	20	5500.74	6223.76	5234.66	4344.96	3889.98	4623.03	5637.94	4275.17	1.31876	0.0184904	0.149495	TRUE
Q99PL5	Ribosome-binding protein 1 OS=Mus musculus OX=10090 GN=Rrbp1 PE=1 SV=2	33	28	34	5747.94	6713.45	6161.41	7478.63	7394.76	7487.09	6195.07	7453.38	0.831176	0.0148301	0.1359	TRUE
O70405	Serine/threonine-protein kinase ULK1 OS=Mus musculus OX=10090 GN=Ulk1 PE=1 SV=1	1	1		30.5276	29.0146		36.3464	36.5138		29.7615	36.43	0.81695	0.0155614	0.139368	TRUE
P01887	Beta-2-microglobulin OS=Mus musculus OX=10090 GN=B2m PE=1 SV=2	2	2	2	883.601	877.867	888.778	1101.77	1058.4	1038.01	883.404	1065.73	0.828918	0.000469047	0.0488105	TRUE
A6H630	Protein-glutamate O-methyltransferase OS=Mus musculus OX=10090 GN=Armt1 PE=1 SV=1	3	4	1	441.2	437.327	450.148	407.009	347.805	351.307	442.859	367.741	1.20427	0.0226083	0.160208	TRUE
Q62009	Periostin OS=Mus musculus OX=10090 GN=Postn PE=1 SV=2	18	20	24	2315.15	2494.03	2505.68	3390.96	3320.69	3171.4	2436.7	3293.07	0.739947	0.000741824	0.0500719	TRUE
P97493	Thioredoxin, mitochondrial OS=Mus musculus OX=10090 GN=Txn2 PE=1 SV=1	1	2	1	503.045	497.28	484.639	411.794	371.818	418.942	494.928	400.302	1.23639	0.00545662	0.0919382	TRUE
O55176	E3 ubiquitin-protein ligase Praja-1 OS=Mus musculus OX=10090 GN=Pja1 PE=1 SV=3	1	1	1	47.7395	63.1347	38.5822	145.635	112.717	153.23	48.8103	135.998	0.358904	0.00393057	0.0807491	TRUE
Q8K5B2	Multiple coagulation factor deficiency protein 2 homolog OS=Mus musculus OX=10090 GN=Mcfd2 PE=1 SV=1	4	5	5	1290.27	1256.76	1331.9	825.429	897.556	830.385	1292.61	850.498	1.51983	0.000191842	0.0348112	TRUE
Q9CWL8	Beta-catenin-like protein 1 OS=Mus musculus OX=10090 GN=Ctnnbl1 PE=1 SV=1	3	4	3	186.591	203.038	218.38	294.713	267.393	234.522	202.252	264.389	0.764979	0.0289294	0.175947	TRUE
Q8BH57	WD repeat-containing protein 48 OS=Mus musculus OX=10090 GN=Wdr48 PE=1 SV=1	1	4	2	500.534	482.469	515.873	420.906	435.337	382.178	499.438	412.185	1.21169	0.0116206	0.121327	TRUE
Q7TPM9	Myotubularin-related protein 10 OS=Mus musculus OX=10090 GN=Mtmr10 PE=1 SV=2	2	4	2	127.654	135.855	136.266	116.112	105.187	110.491	133.199	110.507	1.20535	0.00630404	0.0965127	TRUE
A2A8L5	Receptor-type tyrosine-protein phosphatase F OS=Mus musculus OX=10090 GN=Ptprf PE=1 SV=1	7	15	11	988.352	930.99	935.755	1282.91	1234.61	1230.12	951.349	1248.99	0.761697	0.000311299	0.0448811	TRUE
Q3UGS4	Mapk-regulated corepressor-interacting protein 1 OS=Mus musculus OX=10090 GN=Mcrip1 PE=1 SV=1	3	3	2	476.298	588.664	469.096	411.547	381.737	377.045	508.553	389.816	1.3046	0.0272903	0.171351	TRUE
Q5SS55	EH domain-binding protein 1 (Fragment) OS=Mus musculus OX=10090 GN=Ehbp1 PE=1 SV=1	1	1	1	27.1004	29.6321	29.3828	25.5382	22.6863	22.9719	28.6821	23.6983	1.2103	0.0154763	0.139138	TRUE
P18911	Retinoic acid receptor gamma OS=Mus musculus OX=10090 GN=Rarg PE=1 SV=3	1	1	1	61.4911	50.8153	48.893	66.464	72.3873	67.1466	53.4586	68.6159	0.7791	0.0301418	0.177814	TRUE
Q9CRB0	Sorting nexin-24 OS=Mus musculus OX=10090 GN=Snx24 PE=1 SV=1	2	1	2	82.3294	85.8981	80.2034	67.8784	68.4126	70.5901	82.7771	68.9505	1.20053	0.00142573	0.0598573	TRUE
P12023	Amyloid-beta A4 protein OS=Mus musculus OX=10090 GN=App PE=1 SV=3	5	3	3	387.279	378.865	361.095	484.185	534.076	507.699	375.587	508.245	0.738987	0.000992235	0.0560478	TRUE
F8VQJ3	Laminin subunit gamma-1 OS=Mus musculus OX=10090 GN=Lamc1 PE=1 SV=1	10	13	12	3183.18	3338.28	3125.91	2719.73	2644.92	2669.26	3214.55	2677.79	1.20045	0.00100513	0.0560478	TRUE
A6X935	Inter alpha-trypsin inhibitor, heavy chain 4 OS=Mus musculus OX=10090 GN=Itih4 PE=1 SV=2	1	1	5	446.717	521.993	416.846	564.211	552.249	590.184	459.788	568.663	0.808542	0.0374727	0.196114	TRUE
P49769	Presenilin-1 OS=Mus musculus OX=10090 GN=Psen1 PE=1 SV=1	1	1	1	69.9354	70.026	84.6833	93.6804	95.9748	94.7587	74.5735	94.8	0.786641	0.0199011	0.153575	TRUE
Q80V62	Fanconi anemia group D2 protein homolog OS=Mus musculus OX=10090 GN=Fancd2 PE=1 SV=2	1	1		112.962	109.039		131.628	137.367		110.983	134.467	0.825356	0.0202035	0.153575	TRUE
P97352	Protein S100-A13 OS=Mus musculus OX=10090 GN=S100a13 PE=1 SV=1	3	3	4	1140.74	1093.25	1132.77	901.263	874.082	953.167	1122.06	908.917	1.2345	0.00180318	0.0607634	TRUE
B0V2N1	Receptor-type tyrosine-protein phosphatase S OS=Mus musculus OX=10090 GN=Ptprs PE=1 SV=1	5	6	1	146.539	160.593	119.166	179.977	179.737	195.19	141.019	184.829	0.762967	0.0428488	0.207339	TRUE
P24549	Retinal dehydrogenase 1 OS=Mus musculus OX=10090 GN=Aldh1a1 PE=1 SV=5	1	5	4	356.454	315.798	352.759	286.011	293.463	272.844	341.164	283.977	1.20138	0.0142828	0.134187	TRUE
Q9CQ62	2,4-dienoyl-CoA reductase, mitochondrial OS=Mus musculus OX=10090 GN=Decr1 PE=1 SV=1	4	4	2	494.801	502.979	489.299	388.284	423.149	402.334	495.661	404.337	1.22586	0.00147699	0.0598573	TRUE
P62806	Histone H4 OS=Mus musculus OX=10090 GN=Hist1h4a PE=1 SV=2	8	7	5	1933.03	2090.46	2416.87	2692.05	2591.23	2518.53	2137.52	2599.63	0.82224	0.0455291	0.212728	TRUE
O08709	Peroxiredoxin-6 OS=Mus musculus OX=10090 GN=Prdx6 PE=1 SV=3	2	3	2	318.43	306.021	299.968	254.254	253.757	232.306	308.045	246.556	1.24939	0.00298714	0.073112	TRUE
Q9QWR8	Alpha-N-acetylgalactosaminidase OS=Mus musculus OX=10090 GN=Naga PE=1 SV=2	2	7	8	860.918	993.342	932.992	822.939	630.141	629.294	927.498	688.472	1.34718	0.0387709	0.199526	TRUE
Q03146	Epithelial discoidin domain-containing receptor 1 OS=Mus musculus OX=10090 GN=Ddr1 PE=2 SV=2	1	2	1	47.6574	53.6337	49.1725	64.6504	64.1719	60.8394	50.0914	63.1976	0.792616	0.00444057	0.0835326	TRUE
P14733	Lamin-B1 OS=Mus musculus OX=10090 GN=Lmnb1 PE=1 SV=3	1	6	4	463.636	498.313	564.274	654.728	654.777	599.103	507.057	635.651	0.797697	0.0248729	0.165021	TRUE
P01029	Complement C4-B OS=Mus musculus OX=10090 GN=C4b PE=1 SV=3	1	4	2	840.756	825.242	884.331	439.065	557.458	482.278	849.745	490.546	1.73224	0.00162147	0.0607634	TRUE
Q80X85	28S ribosomal protein S7, mitochondrial OS=Mus musculus OX=10090 GN=Mrps7 PE=1 SV=1	1	2	2	57.5731	50.8796	57.5501	72.225	67.2367	62.5735	55.242	67.2297	0.821691	0.0281769	0.174117	TRUE
Q9D8U8	Sorting nexin-5 OS=Mus musculus OX=10090 GN=Snx5 PE=1 SV=1	11	14	9	3361.18	3162.89	3292.07	2675.4	2736.72	2703.8	3271.01	2705.19	1.20916	0.00056362	0.0488105	TRUE
O35143	ATPase inhibitor, mitochondrial OS=Mus musculus OX=10090 GN=ATP5IF1 PE=1 SV=2	4	1	2	478.676	542.871	509.746	405.614	383.84	339.547	509.758	375.308	1.35824	0.00868985	0.107838	TRUE
Q8C0J6	Ankyrin repeat domain-containing protein SOWAHC OS=Mus musculus OX=10090 GN=Sowahc PE=1 SV=2	3	3	1	103.37	101.804	100.947	82.725	84.2009	73.4341	102.036	79.9743	1.27585	0.00499908	0.0890031	TRUE
O89017	Legumain OS=Mus musculus OX=10090 GN=Lgmn PE=1 SV=1	4	5	3	320.636	348.72	305.298	502.294	464.168	483.338	324.393	483.016	0.671599	0.000903099	0.0548726	TRUE
Q9Z1M4	Ribosomal protein S6 kinase beta-2 OS=Mus musculus OX=10090 GN=Rps6kb2 PE=1 SV=1	2	1		50.9476	48.4925		61.782	64.225		49.7049	62.9917	0.789071	0.0171159	0.147102	TRUE
Q8CHS8	Vacuolar protein sorting-associated protein 37A OS=Mus musculus OX=10090 GN=Vps37a PE=1 SV=1	1	2	3	252.724	228.79	218.143	185.261	184.571	206.264	232.778	191.774	1.21381	0.0267366	0.169465	TRUE
Q9JMG1	Endothelial differentiation-related factor 1 OS=Mus musculus OX=10090 GN=Edf1 PE=1 SV=1	1	1	1	313.419	366.87	320.081	285.9	279.092	264.146	332.634	276.228	1.2042	0.0272493	0.171351	TRUE
Q8CGU1	Calcium-binding and coiled-coil domain-containing protein 1 OS=Mus musculus OX=10090 GN=Calcoco1 PE=1 SV=2	2	4	4	361.178	298.55	319.509	238.385	273.309	278.986	325.392	262.929	1.23757	0.0457747	0.21313	TRUE
Q80WB5	Protein N-terminal glutamine amidohydrolase OS=Mus musculus OX=10090 GN=Wdyhv1 PE=1 SV=1	1	1	1	27.3239	28.1687	32.5533	43.7171	38.8348	41.7948	29.2618	41.3998	0.706811	0.00564271	0.0925483	TRUE
Q8CD10	Calcium uptake protein 2, mitochondrial OS=Mus musculus OX=10090 GN=Micu2 PE=1 SV=2	3	2	3	223.391	263.33	277.913	200.663	199.412	191.887	253.8	197.283	1.28648	0.0199239	0.153575	TRUE
Q8BQ89	LIX1-like protein OS=Mus musculus OX=10090 GN=Lix1l PE=2 SV=2	2	4	2	337.285	365.913	332.052	450.841	402.06	434.816	344.768	428.753	0.804118	0.00854131	0.107259	TRUE
Q922Q1	Mitochondrial amidoxime reducing component 2 OS=Mus musculus OX=10090 GN=Marc2 PE=1 SV=1	6	3	2	642.253	643.459	551.683	740.278	741.716	858.208	610.903	778.171	0.78505	0.026684	0.169465	TRUE
Q7TPV4	Myb-binding protein 1A OS=Mus musculus OX=10090 GN=Mybbp1a PE=1 SV=2	5	5	5	299.217	354.228	344.677	478.885	415.64	445.123	331.813	445.803	0.744305	0.0112645	0.121294	TRUE
P19182	Interferon-related developmental regulator 1 OS=Mus musculus OX=10090 GN=Ifrd1 PE=1 SV=2	1	1	1	173.984	176.801	185.29	117.97	124.88	123.557	178.628	122.098	1.46298	0.000121704	0.0316815	TRUE
Q61391	Neprilysin OS=Mus musculus OX=10090 GN=Mme PE=1 SV=3	12	10	13	2273.76	2056.7	2105.85	1695.66	1622.48	1477.24	2143.46	1595.84	1.34315	0.00434234	0.0829932	TRUE
Q9DBY1	E3 ubiquitin-protein ligase synoviolin OS=Mus musculus OX=10090 GN=Syvn1 PE=1 SV=3		1	1		34.445	28.7388		47.5446	48.3611	31.4628	47.9511	0.656144	0.0435721	0.208896	TRUE
F7DBB3	AHNAK nucleoprotein 2 (Fragment) OS=Mus musculus OX=10090 GN=Ahnak2 PE=1 SV=1	8	9	10	1632.51	1936.34	1684.06	2275.17	2378.76	2087.72	1746.08	2243.94	0.778132	0.0181341	0.148896	TRUE
Q8BQY8	Checkpoint protein HUS1 OS=Mus musculus OX=10090 GN=Hus1 PE=2 SV=1	2	1	1	80.2582	69.0625	72.1163	92.662	106.611	101.553	73.664	100.107	0.735851	0.00721193	0.102677	TRUE
Q8C142	Low density lipoprotein receptor adapter protein 1 OS=Mus musculus OX=10090 GN=Ldlrap1 PE=1 SV=3	1	4	3	158.14	151.79	176.395	130.037	143.381	117.54	161.78	129.892	1.2455	0.0393506	0.199759	TRUE
Q99K74	Mediator of RNA polymerase II transcription subunit 24 OS=Mus musculus OX=10090 GN=Med24 PE=1 SV=1		1	4		109.73	103.903		134.941	140.05	106.777	137.472	0.776721	0.0166415	0.144617	TRUE
Q9ERI6	Retinol dehydrogenase 14 OS=Mus musculus OX=10090 GN=Rdh14 PE=1 SV=1	1	1	2	116.285	124.313	113.06	94.382	96.6434	99.9867	117.792	96.9768	1.21464	0.00403112	0.0816384	TRUE
Q6PGG6	Guanine nucleotide-binding protein-like 3-like protein OS=Mus musculus OX=10090 GN=Gnl3l PE=1 SV=1	2	1	2	70.1338	86.9372	69.8605	108.691	101.873	106.834	75.241	105.76	0.711431	0.0104057	0.118113	TRUE
Q91VC3	Eukaryotic initiation factor 4A-III OS=Mus musculus OX=10090 GN=Eif4a3 PE=1 SV=3	7	6	5	1063.02	1084.62	1059.24	1333.27	1309.18	1328.16	1068.9	1323.5	0.807634	2.06114e-05	0.0241359	TRUE
Q8K201	Keratinocyte-associated transmembrane protein 2 OS=Mus musculus OX=10090 GN=Kct2 PE=1 SV=2	1	1	1	130.287	142.055	131.933	189.412	180.486	170.744	134.659	180.052	0.747891	0.00196872	0.0626757	TRUE
Q5SFM8	RNA-binding protein 27 OS=Mus musculus OX=10090 GN=Rbm27 PE=1 SV=3	1	1	1	32.3575	44.7944	38.4291	51.3196	49.8798	49.5518	38.1903	50.2446	0.760088	0.044064	0.209539	TRUE
Q9R078	5'-AMP-activated protein kinase subunit beta-1 OS=Mus musculus OX=10090 GN=Prkab1 PE=1 SV=2	2	5	6	291.649	271.622	269.257	208.856	244.432	236.204	277.331	229.314	1.20939	0.0244981	0.164114	TRUE
Q61823	Programmed cell death protein 4 OS=Mus musculus OX=10090 GN=Pdcd4 PE=1 SV=1	7	3	6	464.762	589.281	688.191	2806.1	2411.06	2276.66	573.351	2488.11	0.230436	0.000351444	0.0451637	TRUE
P02798	Metallothionein-2 OS=Mus musculus OX=10090 GN=Mt2 PE=1 SV=2	3	2	4	237.998	220.149	255.86	90.9837	134.711	70.9894	237.555	95.467	2.48835	0.00889724	0.108879	TRUE
O70311	Glycylpeptide N-tetradecanoyltransferase 2 OS=Mus musculus OX=10090 GN=Nmt2 PE=1 SV=1	4	1		290.444	299.022		397.991	447.136		294.702	421.849	0.698595	0.0268669	0.169635	TRUE
Q9D9M5	Pyridoxal phosphate phosphatase PHOSPHO2 OS=Mus musculus OX=10090 GN=Phospho2 PE=1 SV=1		1	1		70.798	65.1489		83.9087	89.8004	67.9147	86.8045	0.782387	0.044642	0.210577	TRUE
Q3TMV7	Pyridine nucleotide-disulfide oxidoreductase domain-containing protein 1 OS=Mus musculus OX=10090 GN=Pyroxd1 PE=2 SV=1	1	1		47.3435	44.5453		29.5557	31.2123		45.9231	30.3727	1.51198	0.00963802	0.11347	TRUE
P48024	Eukaryotic translation initiation factor 1 OS=Mus musculus OX=10090 GN=Eif1 PE=1 SV=2	5	4	7	1204.33	1359.75	1381.82	1155.32	1068.42	1038.18	1312.86	1086.19	1.20868	0.0245073	0.164114	TRUE
O55239	Nicotinamide N-methyltransferase OS=Mus musculus OX=10090 GN=Nnmt PE=1 SV=1	1	2	3	123.626	106.726	109.731	92.5162	79.1069	87.7679	113.128	86.2825	1.31114	0.013635	0.130873	TRUE
P17809	Solute carrier family 2, facilitated glucose transporter member 1 OS=Mus musculus OX=10090 GN=Slc2a1 PE=1 SV=4	4	5	4	451.898	559.568	543.053	702.906	663.7	650.236	515.915	671.914	0.76783	0.0202298	0.153575	TRUE
Q60932	Voltage-dependent anion-selective channel protein 1 OS=Mus musculus OX=10090 GN=Vdac1 PE=1 SV=3	8	10	8	1547.78	1766.49	1762.7	2207.2	2018.51	1990.97	1689.14	2070.04	0.815994	0.020104	0.153575	TRUE
Q91V98	Endosialin OS=Mus musculus OX=10090 GN=Cd248 PE=1 SV=1	1	3	1	277.793	275.857	301.686	352.935	371.441	319.042	284.875	347.118	0.820685	0.0204747	0.153692	TRUE
Q9Z0F8	Disintegrin and metalloproteinase domain-containing protein 17 OS=Mus musculus OX=10090 GN=Adam17 PE=1 SV=3	1	1	4	98.1357	99.2941	117.717	158.901	128.558	132.198	104.68	139.257	0.751701	0.0323897	0.182737	TRUE
Q00993	Tyrosine-protein kinase receptor UFO OS=Mus musculus OX=10090 GN=Axl PE=1 SV=2	6	3	8	410.411	432.814	411.727	525.447	545.873	512.736	418.193	527.843	0.792268	0.000746488	0.0500719	TRUE
P21981	Protein-glutamine gamma-glutamyltransferase 2 OS=Mus musculus OX=10090 GN=Tgm2 PE=1 SV=4	3	5	4	311.42	287.847	300.091	234.113	238.46	227.773	299.631	233.407	1.28373	0.000691261	0.0500719	TRUE
Q3TQC7	Ectonucleoside triphosphate diphosphohydrolase 5 OS=Mus musculus OX=10090 GN=Entpd5 PE=1 SV=1	2	2	4	181.388	149.608	154.002	115.549	124.975	121.498	161.076	120.611	1.3355	0.0107716	0.118849	TRUE
Q99K95	Protein RTF2 homolog OS=Mus musculus OX=10090 GN=Rtfdc1 PE=1 SV=1	2	1	1	300.505	278.595	290.454	218.182	246.666	192.588	289.713	218.032	1.32877	0.019036	0.150362	TRUE
P23949	mRNA decay activator protein ZFP36L2 OS=Mus musculus OX=10090 GN=Zfp36l2 PE=1 SV=2	1	2	2	520.464	412.425	509.709	222.689	286.903	228.027	478.284	244.234	1.9583	0.003606	0.0785408	TRUE
Q8BP71	RNA binding protein fox-1 homolog 2 OS=Mus musculus OX=10090 GN=Rbfox2 PE=1 SV=2	1	2	2	187.372	188.654	202.688	243.261	278.965	243.085	192.782	254.562	0.757309	0.00599094	0.0941541	TRUE
Q31125	Zinc transporter SLC39A7 OS=Mus musculus OX=10090 GN=Slc39a7 PE=1 SV=2	1	4	3	902.365	873.326	933.383	694.388	734.635	686.959	902.692	705.02	1.28038	0.000948568	0.0548726	TRUE
Q8BG81	Polymerase delta-interacting protein 3 OS=Mus musculus OX=10090 GN=Poldip3 PE=1 SV=1	1	1	2	40.894	47.1086	51.8306	56.4888	63.507	59.8031	46.3926	59.8645	0.77496	0.029268	0.175947	TRUE
Q61140	Breast cancer anti-estrogen resistance protein 1 OS=Mus musculus OX=10090 GN=Bcar1 PE=1 SV=2	11	11	9	1738.45	1805.15	1941.98	1538.42	1455.04	1411.24	1826.59	1467.29	1.24487	0.0060017	0.0941541	TRUE
Q61937	Nucleophosmin OS=Mus musculus OX=10090 GN=Npm1 PE=1 SV=1	11	11	14	1723.3	1845.22	1784.53	2421.56	2272.33	2343.17	1783.65	2344.9	0.760653	0.000530835	0.0488105	TRUE
Q9CX60	Protein LBH OS=Mus musculus OX=10090 GN=Lbh PE=1 SV=1	1	1	2	121.679	112.771	114.231	92.474	95.2396	94.9457	116.162	94.2116	1.233	0.00115971	0.0598573	TRUE
Q9R0Q6	Actin-related protein 2/3 complex subunit 1A OS=Mus musculus OX=10090 GN=Arpc1a PE=1 SV=1	2	1	2	282.116	287.941	319.043	235.696	236.102	232.003	295.933	234.593	1.26148	0.00379066	0.0798705	TRUE
Q01320	DNA topoisomerase 2-alpha OS=Mus musculus OX=10090 GN=Top2a PE=1 SV=2	3	1	3	51.5045	54.1953	60.1583	66.3076	64.7405	70.3479	55.1697	67.0909	0.822313	0.0196772	0.153575	TRUE
P18406	Protein CYR61 OS=Mus musculus OX=10090 GN=Cyr61 PE=1 SV=1	2	3	3	69.5097	91.6589	73.5393	122.721	128.553	117.345	77.6688	122.788	0.632544	0.00660343	0.0980175	TRUE
H3BKQ3	Ecotropic viral integration site 5-like OS=Mus musculus OX=10090 GN=Evi5l PE=1 SV=1	1	2	2	73.7495	93.1872	77.1145	104.857	96.2039	108.698	80.9252	103.119	0.784777	0.039293	0.199759	TRUE
J3QN89	Angio-associated migratory protein OS=Mus musculus OX=10090 GN=Aamp PE=1 SV=1	3	3	1	215.975	209.821	199.954	161.055	151.785	171.961	208.478	161.39	1.29176	0.0038196	0.0798705	TRUE
Q91VY9	Zinc finger protein 622 OS=Mus musculus OX=10090 GN=Znf622 PE=1 SV=1	4	2	3	642.762	728.028	703.912	574.089	482.381	543.66	690.62	531.984	1.2982	0.0146967	0.1359	TRUE
Q9CQ79	Thioredoxin domain-containing protein 9 OS=Mus musculus OX=10090 GN=Txndc9 PE=1 SV=1	3	3	3	486.774	491.09	451.59	378.282	324.492	372.579	476.151	357.613	1.33147	0.00673739	0.0992389	TRUE
Q9WUU7	Cathepsin Z OS=Mus musculus OX=10090 GN=Ctsz PE=1 SV=1	4	4	5	1803.27	1651.18	1749.26	1372.62	1375.86	1480.02	1733.42	1408.63	1.23057	0.00439186	0.0831421	TRUE
O08736	Caspase-12 OS=Mus musculus OX=10090 GN=Casp12 PE=1 SV=1	1	1	3	51.4177	44.2911	48.0772	56.0548	59.4416	63.76	47.8398	59.6693	0.80175	0.0178779	0.148411	TRUE
Q64337	Sequestosome-1 OS=Mus musculus OX=10090 GN=Sqstm1 PE=1 SV=1	11	8	8	1810.72	1749	1558.66	928.973	916.972	1187.93	1702.67	1003.96	1.69595	0.0052451	0.090693	TRUE
Q78IK4	MICOS complex subunit Mic27 OS=Mus musculus OX=10090 GN=Apool PE=1 SV=1	1	1	1	155.74	158.635	166.331	200.625	218.845	226.659	160.173	215.096	0.744662	0.00202212	0.062957	TRUE
P97473	RISC-loading complex subunit TARBP2 OS=Mus musculus OX=10090 GN=Tarbp2 PE=1 SV=2		1	1		100.894	97.1759		128.441	121.54	99.0176	124.943	0.792503	0.0200025	0.153575	TRUE
Q61398	Procollagen C-endopeptidase enhancer 1 OS=Mus musculus OX=10090 GN=Pcolce PE=1 SV=2	10	7	7	1135.91	1180.37	1171.85	1588.89	1445.17	1377.06	1162.55	1467.76	0.792056	0.00591979	0.0941541	TRUE
Q9Z0W3	Nuclear pore complex protein Nup160 OS=Mus musculus OX=10090 GN=Nup160 PE=1 SV=2	5	6	6	403.877	375.455	391.077	309.129	312.501	314.698	389.963	312.101	1.24948	0.00051195	0.0488105	TRUE
Q9Z0R9	Fatty acid desaturase 2 OS=Mus musculus OX=10090 GN=Fads2 PE=1 SV=1	4	3	5	518.171	375.591	492.216	669.581	723.685	739.162	457.56	710.173	0.644294	0.0135076	0.130184	TRUE
E9Q634	Unconventional myosin-Ie OS=Mus musculus OX=10090 GN=Myo1e PE=1 SV=1	10	14	22	1811.69	1774.86	1887.56	1476.52	1420.85	1475.2	1824.1	1457.29	1.25171	0.000527622	0.0488105	TRUE
Q03958	Prefoldin subunit 6 OS=Mus musculus OX=10090 GN=Pfdn6 PE=1 SV=1	6	7	5	1133.78	1242.59	1102.71	997.707	911.169	878.963	1158.17	927.949	1.2481	0.01319	0.128712	TRUE
Q6NVF9	Cleavage and polyadenylation specificity factor subunit 6 OS=Mus musculus OX=10090 GN=Cpsf6 PE=1 SV=1	4	4	5	352.488	415.126	352.399	473.724	446.618	491.611	372.208	470.285	0.791453	0.0188569	0.149863	TRUE
Q62356	Follistatin-related protein 1 OS=Mus musculus OX=10090 GN=Fstl1 PE=1 SV=2	5	4	4	1047.13	1022.63	1111.41	1392.82	1378.62	1353.28	1059.74	1374.81	0.770823	0.000573138	0.0488105	TRUE
F8WGX5	DmX-like protein 1 OS=Mus musculus OX=10090 GN=Dmxl1 PE=1 SV=1		1	2		60.8925	56.1539		44.2495	44.4305	58.4752	44.3399	1.31879	0.0208145	0.155557	TRUE
P28063	Proteasome subunit beta type-8 OS=Mus musculus OX=10090 GN=Psmb8 PE=1 SV=2	1	3	2	470.242	385.653	461.724	337.837	372.766	311.266	437.489	339.697	1.28788	0.0367126	0.194025	TRUE
P62983	Ubiquitin-40S ribosomal protein S27a OS=Mus musculus OX=10090 GN=Rps27a PE=1 SV=2	8	11	8	8050.66	8812.29	8194.27	7311.31	6817.57	6457.45	8345.97	6853.23	1.21782	0.0122066	0.125368	TRUE
Q59IW6	ABI gene family, member 3 (NESH)-binding protein OS=Mus musculus OX=10090 GN=Abi3bp PE=1 SV=1	6	6	6	641.391	626.258	674.349	795.105	794.808	789.433	647.024	793.111	0.815805	0.000748299	0.0500719	TRUE
Q9D104	Signal recognition particle 19 kDa protein OS=Mus musculus OX=10090 GN=Srp19 PE=1 SV=1	2	3	1	147.191	161.358	160.864	133.467	122.151	120.041	156.331	125.083	1.24981	0.00746677	0.103125	TRUE
E9Q616	AHNAK nucleoprotein (desmoyokin) OS=Mus musculus OX=10090 GN=Ahnak PE=1 SV=1	199	191	223	52400.3	50576.2	49978.1	62195.2	63794.4	63964.3	50974.5	63312.9	0.80512	0.000207667	0.0348112	TRUE
P21460	Cystatin-C OS=Mus musculus OX=10090 GN=Cst3 PE=1 SV=2	6	5	6	935.664	910.57	905.425	1227.37	1245.68	1245.54	917.125	1239.5	0.739916	1.16435e-05	0.0241359	TRUE
Q91WK7	Ankyrin repeat domain-containing protein 54 OS=Mus musculus OX=10090 GN=Ankrd54 PE=1 SV=1	1	1	1	111.449	106.361	117.858	146.625	159.718	142.671	111.791	149.497	0.747777	0.00298878	0.073112	TRUE
P47915	60S ribosomal protein L29 OS=Mus musculus OX=10090 GN=Rpl29 PE=1 SV=2	2	2	2	209.769	229.46	210.908	266.601	272.555	267.38	216.528	268.832	0.805439	0.00192557	0.0625478	TRUE
Q3TQI7	Telomere length and silencing protein 1 homolog OS=Mus musculus OX=10090 PE=1 SV=2	1	2	1	159.669	155.741	153.968	123.279	125.248	114.653	156.441	120.971	1.29321	0.000923223	0.0548726	TRUE
P35441	Thrombospondin-1 OS=Mus musculus OX=10090 GN=Thbs1 PE=1 SV=1	9	18	18	1912.84	1792.4	1888.22	2723.83	2631.77	2633.08	1863.75	2662.55	0.699989	9.92191e-05	0.0309828	TRUE
Q9Z255	Ubiquitin-conjugating enzyme E2 A OS=Mus musculus OX=10090 GN=Ube2a PE=1 SV=1	3	1	2	358.323	356.279	349.243	455.193	413.155	427.25	354.593	431.516	0.821738	0.00263227	0.0692439	TRUE
Q9CQ22	Ragulator complex protein LAMTOR1 OS=Mus musculus OX=10090 GN=Lamtor1 PE=1 SV=1	2	4	1	262.801	215.649	239.415	180.911	203.705	187.533	238.511	190.479	1.25216	0.0284765	0.175371	TRUE
P97333	Neuropilin-1 OS=Mus musculus OX=10090 GN=Nrp1 PE=1 SV=2	1	3	3	334.6	336.506	320.039	273.337	264.252	280.13	330.299	272.495	1.21213	0.00115281	0.0598573	TRUE
P83940	Elongin-C OS=Mus musculus OX=10090 GN=Eloc PE=1 SV=1	7	4	3	419.391	416.248	460.342	535.039	564.12	469.915	431.536	521.505	0.827482	0.0400943	0.200577	TRUE
Q00493	Carboxypeptidase E OS=Mus musculus OX=10090 GN=Cpe PE=1 SV=2	4	4	2	671.507	681.714	636.442	859.514	908.048	968.751	662.934	911.013	0.727689	0.00140693	0.0598573	TRUE
P02463	Collagen alpha-1(IV) chain OS=Mus musculus OX=10090 GN=Col4a1 PE=1 SV=4	2	2	2	253.753	267.125	269.133	216.874	225.182	214.324	263.248	218.745	1.20345	0.00145882	0.0598573	TRUE
P20352	Tissue factor OS=Mus musculus OX=10090 GN=F3 PE=1 SV=2	3	2	3	482.335	417.781	462.141	311.757	352.239	348.919	453.27	337.126	1.34451	0.0069188	0.1004	TRUE
P14901	Heme oxygenase 1 OS=Mus musculus OX=10090 GN=Hmox1 PE=1 SV=1	5	7	3	735.793	709.892	764.146	359.067	386.616	340.187	736.277	361.458	2.03696	7.6328e-05	0.0303266	TRUE
P97287	Induced myeloid leukemia cell differentiation protein Mcl-1 homolog OS=Mus musculus OX=10090 GN=Mcl1 PE=1 SV=3	1	1	1	53.0983	42.8147	35.1926	25.0278	23.613	34.1156	43.0899	27.2171	1.58319	0.0493932	0.220328	TRUE
Q61112	45 kDa calcium-binding protein OS=Mus musculus OX=10090 GN=Sdf4 PE=1 SV=1	5	5	8	941.903	989.618	885.566	1232.1	1167.65	1246.76	938.062	1215.01	0.772059	0.00241884	0.0670405	TRUE
Q6XLQ8	Calumenin OS=Mus musculus OX=10090 GN=Calu PE=1 SV=1	3	29	3	5034.74	4417.71	5113.82	3656.22	4409.58	3800.84	4845.14	3942.48	1.22896	0.048693	0.21994	TRUE
Q6NXL5	ArfGAP with coiled-coil, ankyrin repeat and PH domains 3 OS=Mus musculus OX=10090 GN=Acap3 PE=1 SV=1	1	2		42.8134	37.2762		29.5163	29.7465		39.949	29.6312	1.34821	0.04989	0.220864	TRUE
P07214	SPARC OS=Mus musculus OX=10090 GN=Sparc PE=1 SV=1	5	4	7	581.245	581.96	562.575	945.293	960.661	894.359	575.189	933.002	0.616493	3.77816e-05	0.0252415	TRUE
Q9CQS5	Serine/threonine-protein kinase RIO2 OS=Mus musculus OX=10090 GN=Riok2 PE=1 SV=1	5	5	1	282.844	291.01	338.293	230.791	221.552	200.271	303.098	217.155	1.39576	0.0087616	0.107998	TRUE
M0QWC2	MCG14171, isoform CRA_b OS=Mus musculus OX=10090 GN=Map1lc3b PE=1 SV=1	3		2	755.18		770.983	530.437		519.831	763.04	525.107	1.45311	0.00149466	0.0598573	TRUE
Q9CXW4	60S ribosomal protein L11 OS=Mus musculus OX=10090 GN=Rpl11 PE=1 SV=4	4		5	1762.83		1897.77	2265.53		2243.22	1829.06	2254.35	0.811347	0.0302503	0.178005	TRUE
Q05860	Formin-1 OS=Mus musculus OX=10090 GN=Fmn1 PE=1 SV=2	2		1	165.832		186.249	120.208		126.56	175.744	123.343	1.42484	0.0307001	0.179301	TRUE
Q6P4S6	Serine/threonine-protein kinase SIK3 OS=Mus musculus OX=10090 GN=Sik3 PE=1 SV=3	2		5	394.89		399.081	319.47		320.54	396.98	320.005	1.24054	0.000659273	0.0500719	TRUE
B1AVK5	Collagen, type IV, alpha 6 OS=Mus musculus OX=10090 GN=Col4a6 PE=1 SV=1	1		2	204.846		219.475	281.112		287.847	212.034	284.46	0.745393	0.0150516	0.137163	TRUE
O54804	Choline kinase alpha OS=Mus musculus OX=10090 GN=Chka PE=1 SV=3	2		2	144.712		133.897	102.985		108.127	139.199	105.524	1.31912	0.0263233	0.169304	TRUE
Q9D6M3	Mitochondrial glutamate carrier 1 OS=Mus musculus OX=10090 GN=Slc25a22 PE=1 SV=1	1		1	150.882		159.611	199.57		202.85	155.185	201.204	0.771283	0.012473	0.126672	TRUE
Q8BFQ6	Disrupted in renal carcinoma protein 2 homolog OS=Mus musculus OX=10090 GN=Dirc2 PE=2 SV=1	2		1	388.223		379.968	299.135		276.141	384.073	287.408	1.33634	0.0197963	0.153575	TRUE
A2APF7	Z-DNA-binding protein 1 OS=Mus musculus OX=10090 GN=Zbp1 PE=1 SV=1	1		2	119.837		123.28	95.8501		96.8841	121.546	96.3657	1.2613	0.00422924	0.0826698	TRUE
Q8BG94	COMM domain-containing protein 7 OS=Mus musculus OX=10090 GN=Commd7 PE=1 SV=1	1		1	156.496		159.237	125.09		125.3	157.86	125.195	1.26091	0.0014129	0.0598573	TRUE
Q5NC05	Transcription termination factor 2 OS=Mus musculus OX=10090 GN=Ttf2 PE=1 SV=2		1	2		34.8188	33.0211		23.8472	25.4569	33.908	24.6389	1.3762	0.0169126	0.145891	TRUE
Q9CWZ3-2	Isoform 2 of RNA-binding protein 8A OS=Mus musculus OX=10090 GN=Rbm8a		3	5		1009.17	1002.98		1244.15	1259.94	1006.07	1252.02	0.80356	0.00102813	0.0561473	TRUE
Q9WUR9	Adenylate kinase 4, mitochondrial OS=Mus musculus OX=10090 GN=Ak4 PE=1 SV=1		2	1		28.2523	29.9226		35.1235	35.098	29.0755	35.1107	0.828107	0.0224106	0.159531	TRUE
Q8C2E4	Pentatricopeptide repeat-containing protein 1, mitochondrial OS=Mus musculus OX=10090 GN=Ptcd1 PE=2 SV=2		1	1		36.9221	35.0382		44.4065	47.604	35.9678	45.9774	0.782293	0.0300154	0.17737	TRUE
F7AA26	Paralemmin A kinase anchor protein (Fragment) OS=Mus musculus OX=10090 GN=Pakap PE=1 SV=1		11	7		1403.51	1406.8		1150.02	1124.6	1405.15	1137.24	1.23558	0.00280887	0.0717147	TRUE
Q9DCX1	MAD2L1-binding protein OS=Mus musculus OX=10090 GN=Mad2l1bp PE=1 SV=2		1	1		88.8849	95.022		109.687	114.724	91.9023	112.177	0.819262	0.0383949	0.198571	TRUE
Q99LH1	Nucleolar GTP-binding protein 2 OS=Mus musculus OX=10090 GN=Gnl2 PE=1 SV=2		1	1		79.7731	75.9367		54.1197	57.2578	77.8312	55.6666	1.39817	0.0122481	0.125368	TRUE
O88874	Cyclin-K OS=Mus musculus OX=10090 GN=Ccnk PE=1 SV=3		2	2		285.434	264.431		331.013	332.296	274.732	331.654	0.828369	0.0389013	0.199759	TRUE
Q9D7Z3	Nucleolar protein 7 OS=Mus musculus OX=10090 GN=Nol7 PE=1 SV=1		1	1		27.1148	29.3007		21.9937	19.542	28.1866	20.7317	1.35959	0.0490713	0.220163	TRUE
P51791	H(+)/Cl(-) exchange transporter 3 OS=Mus musculus OX=10090 GN=Clcn3 PE=1 SV=2		1	1		65.0953	67.0539		77.5242	82.4524	66.0673	79.9503	0.826355	0.0306715	0.179301	TRUE
Q8K1J5	Replication stress response regulator SDE2 OS=Mus musculus OX=10090 GN=Sde2 PE=1 SV=1		1	1		170.876	169.713		222.336	231.654	170.293	226.947	0.750366	0.00520967	0.090693	TRUE
Q9ER81	Torsin-1A-interacting protein 2, isoform IFRG15 OS=Mus musculus OX=10090 GN=Tor1aip2 PE=1 SV=1		2	1		87.8193	86.3388		69.2441	66.9113	87.0759	68.0677	1.27925	0.00597812	0.0941541	TRUE
Q8C145	Zinc transporter ZIP6 OS=Mus musculus OX=10090 GN=Slc39a6 PE=1 SV=1		2	1		209.977	213.5		158.342	171.122	211.731	164.608	1.28627	0.0239674	0.162701	TRUE
P52482	Ubiquitin-conjugating enzyme E2 E1 OS=Mus musculus OX=10090 GN=Ube2e1 PE=1 SV=1		1	1		13.325	9.60174		5.13199	5.66805	11.3112	5.39337	2.09724	0.0495073	0.220328	TRUE
A0A1Y7VK55	Nuclear factor 1 OS=Mus musculus OX=10090 GN=Nfic PE=1 SV=1		1	1		346.235	326.038		257.014	275.436	335.985	266.065	1.26279	0.0364959	0.193875	TRUE
B8JJN0	Uncharacterized protein OS=Mus musculus OX=10090 GN=Gm20547 PE=3 SV=1		2	1		545.273	525.935		308.488	291.976	535.517	300.119	1.78435	0.00321276	0.075619	TRUE
A0A0N4SW93	C2 domain-containing protein 5 OS=Mus musculus OX=10090 GN=C2cd5 PE=1 SV=1		1	1		29.9695	30.5352		22.2504	24.902	30.2511	23.5389	1.28515	0.0480413	0.218471	TRUE
Q9CR50	RING finger and CHY zinc finger domain-containing protein 1 OS=Mus musculus OX=10090 GN=Rchy1 PE=1 SV=1		1	1		139.861	157.7		199.541	197.905	148.513	198.721	0.747341	0.0401239	0.200577	TRUE
P63166	Small ubiquitin-related modifier 1 OS=Mus musculus OX=10090 GN=Sumo1 PE=1 SV=1		2	2		375.888	375.495		652.757	609.612	375.691	630.816	0.595564	0.0043254	0.0829932	TRUE
Q9CR75	Tumor necrosis factor receptor superfamily member 12A OS=Mus musculus OX=10090 GN=Tnfrsf12a PE=2 SV=1	1	1		29.1087	32.275		15.2042	16.9725		30.651	16.064	1.90805	0.0133623	0.129556	TRUE
Q9DBC0	Selenoprotein O OS=Mus musculus OX=10090 GN=Selenoo PE=1 SV=4	1	1		99.2168	96.4385		123.243	126.087		97.8178	124.657	0.784698	0.00559693	0.0925483	TRUE
P02301	Histone H3.3C OS=Mus musculus OX=10090 GN=H3f3c PE=3 SV=3	3	4		1340.15	1325.28		1610.4	1663.63		1332.7	1636.8	0.814209	0.00692337	0.1004	TRUE
Q9D8M3	Heme transporter HRG1 OS=Mus musculus OX=10090 GN=Slc48a1 PE=2 SV=1	1	1		62.7103	58.8812		48.2543	45.6833		60.7656	46.9512	1.29423	0.0251993	0.165988	TRUE
Q8C9B9	Death-inducer obliterator 1 OS=Mus musculus OX=10090 GN=Dido1 PE=1 SV=4	1	1		55.4305	54.5148		123.83	127.152		54.9707	125.48	0.438083	0.000358992	0.0451637	TRUE
Q6P1E1	Zinc finger MIZ domain-containing protein 1 OS=Mus musculus OX=10090 GN=Zmiz1 PE=1 SV=1	1	1		177.185	177.121		134.888	144.842		177.153	139.776	1.2674	0.0218308	0.157898	TRUE
P43277	Histone H1.3 OS=Mus musculus OX=10090 GN=Hist1h1d PE=1 SV=2	4	5		1455.2	1489.28		1952.05	2218.31		1472.14	2080.93	0.707445	0.0334809	0.185372	TRUE
A0A2I3BR29	Protein FAM107B OS=Mus musculus OX=10090 GN=Fam107b PE=1 SV=1	2	2		677.41	752.879		526.834	528.505		714.149	527.669	1.3534	0.0291584	0.175947	TRUE
Q61805	Lipopolysaccharide-binding protein OS=Mus musculus OX=10090 GN=Lbp PE=1 SV=2	1	1		245.544	267.259		412.52	411.565		256.171	412.042	0.621712	0.00786012	0.104511	TRUE
Q920D3	Mediator of RNA polymerase II transcription subunit 28 OS=Mus musculus OX=10090 GN=Med28 PE=1 SV=2	1	2		449.156	451.291		367.068	352.211		450.222	359.563	1.25214	0.00844498	0.10648	TRUE
Q91VJ5	Polyglutamine-binding protein 1 OS=Mus musculus OX=10090 GN=Pqbp1 PE=1 SV=1	2	1		363.285	316.528		225.237	204.787		339.101	214.769	1.57892	0.0320007	0.18206	TRUE
E9Q0Y4	Signal-induced proliferation-associated protein 1 OS=Mus musculus OX=10090 GN=Sipa1 PE=1 SV=1	2	2		37.2222	37.6276		52.7645	47.6278		37.4244	50.1304	0.74654	0.0296637	0.177035	TRUE
Q9D2C7	Bax inhibitor 1 OS=Mus musculus OX=10090 GN=Tmbim6 PE=1 SV=1	1	1		183.03	193.372		250.647	244.839		188.13	247.726	0.759428	0.0115825	0.121327	TRUE
P61327	Protein mago nashi homolog OS=Mus musculus OX=10090 GN=Magoh PE=2 SV=1	4	5		939.968	986.907		1196.63	1131.46		963.151	1163.59	0.827741	0.0364532	0.193875	TRUE
Q61468	Mesothelin OS=Mus musculus OX=10090 GN=Msln PE=1 SV=1	3	1		483.651	467.288		370.583	343.735		475.399	356.906	1.332	0.0201802	0.153575	TRUE
Q8VCF1	Soluble calcium-activated nucleotidase 1 OS=Mus musculus OX=10090 GN=Cant1 PE=2 SV=1	2	2		234.459	248.584		301.297	292.805		241.418	297.021	0.812799	0.0237912	0.161739	TRUE
Q9D2P4	Ubiquitin-related modifier 1 OS=Mus musculus OX=10090 GN=Urm1 PE=1 SV=1	1	1		131.023	120.842		102.172	105.605		125.83	103.874	1.21137	0.0481888	0.218929	TRUE

## Sheet: Comp3
Accession	Description	Counts1.x	Counts1.y	Counts1	R1.128N	R2.128N	R3.128N	R1.126	R2.126	R3.126	Means.C3	Means.Control	FC	TwoSplTTest	TwoSplTTestAdj	Significant
Q3UIR3	E3 ubiquitin-protein ligase DTX3L OS=Mus musculus OX=10090 GN=Dtx3l PE=1 SV=1	2	2	3	65.3282	73.2441	56.6205	52.4786	41.9815	47.5805	64.7067	47.1509	1.37233	0.0325589	0.128156	TRUE
Q6NZQ4	PAX-interacting protein 1 OS=Mus musculus OX=10090 GN=Paxip1 PE=1 SV=1	1	1	1	30.3633	36.3289	35.4982	50.3582	42.5682	39.579	33.9575	43.9413	0.772792	0.047062	0.158361	TRUE
Q04857	Collagen alpha-1(VI) chain OS=Mus musculus OX=10090 GN=Col6a1 PE=1 SV=1	24	19	20	2157.19	2303.03	2227.99	3227.82	3220.1	3255.58	2228.61	3234.46	0.68902	4.14174e-05	0.0107777	TRUE
P56873	Sjoegren syndrome/scleroderma autoantigen 1 homolog OS=Mus musculus OX=10090 GN=Sssca1 PE=1 SV=1	3	5	2	374.743	326.066	373.441	253.284	282.471	288.467	357.345	274.3	1.30275	0.0123111	0.082731	TRUE
Q9EQK5	Major vault protein OS=Mus musculus OX=10090 GN=Mvp PE=1 SV=4	31	25	32	4256.57	4233.53	4605.29	3033.04	2960.15	2908.58	4361.87	2966.82	1.47022	0.000205798	0.0193134	TRUE
Q9D6Z1	Nucleolar protein 56 OS=Mus musculus OX=10090 GN=Nop56 PE=1 SV=2	6	5	2	536.361	522.124	536.82	382.037	400.367	379.597	531.724	387.224	1.37317	7.71678e-05	0.0139021	TRUE
P97449	Aminopeptidase N OS=Mus musculus OX=10090 GN=Anpep PE=1 SV=4	6	3	4	520.151	451.687	446.314	298.089	326.883	326.846	471.559	316.977	1.48768	0.00237408	0.0439238	TRUE
Q8BP67	60S ribosomal protein L24 OS=Mus musculus OX=10090 GN=Rpl24 PE=1 SV=2	7	7	9	4029.81	3727.66	3976.83	3150.01	3064.82	3252.88	3909.18	3154.97	1.23906	0.00192892	0.0398021	TRUE
Q8BR90	UPF0600 protein C5orf51 homolog OS=Mus musculus OX=10090 PE=1 SV=1	4	4	5	349.441	374.026	346.874	284.113	292.343	298.556	356.573	291.611	1.22277	0.00197947	0.0401779	TRUE
Q8K2C7	Protein OS-9 OS=Mus musculus OX=10090 GN=Os9 PE=1 SV=2	3	1	3	481.03	430.027	461.935	543.815	549.713	613.084	457.175	568.027	0.804848	0.012569	0.0833719	TRUE
Q3U962	Collagen alpha-2(V) chain OS=Mus musculus OX=10090 GN=Col5a2 PE=1 SV=1	9	9	8	1236.15	1152.15	1127.19	1656.9	1614.93	1808.2	1170.92	1691.34	0.692299	0.00113102	0.0320409	TRUE
Q9ESX5	H/ACA ribonucleoprotein complex subunit 4 OS=Mus musculus OX=10090 GN=Dkc1 PE=1 SV=4	1	2	3	221.344	219.121	206.42	135.514	166.132	174.934	215.527	157.92	1.36479	0.0184172	0.0999622	TRUE
Q9D7M8	DNA-directed RNA polymerase II subunit RPB4 OS=Mus musculus OX=10090 GN=Polr2d PE=1 SV=2	2	1	1	49.6315	55.0971	50.5373	44.0127	38.3527	46.218	51.701	42.7296	1.20996	0.0417321	0.148086	TRUE
Q61838	Pregnancy zone protein OS=Mus musculus OX=10090 GN=Pzp PE=1 SV=3	3	2	2	979.305	1030.49	1058.82	755.005	751.889	655.987	1022.34	719.448	1.42101	0.00242108	0.0439238	TRUE
Q62523	Zyxin OS=Mus musculus OX=10090 GN=Zyx PE=1 SV=2	17	15	17	2835	2515.37	2386.07	1868.66	1998.21	2176.3	2572.05	2010.47	1.27933	0.0217016	0.106329	TRUE
Q9CQ89	Protein CutA OS=Mus musculus OX=10090 GN=Cuta PE=1 SV=3	2	2	3	580.908	588.867	589.614	477.956	483.581	456.358	586.45	472.484	1.2412	0.000295623	0.0216649	TRUE
Q9CQX2	Cytochrome b5 type B OS=Mus musculus OX=10090 GN=Cyb5b PE=1 SV=1	6	4	3	582.246	578.778	579.649	776.123	648.263	678.216	580.223	698.796	0.830318	0.0263673	0.116844	TRUE
Q3TPE9	Ankyrin repeat and MYND domain-containing protein 2 OS=Mus musculus OX=10090 GN=Ankmy2 PE=1 SV=1	4	3	4	204.513	202.814	199.685	271.408	256.674	254.272	202.327	260.676	0.776166	0.000297938	0.0216649	TRUE
Q6P8I4	PEST proteolytic signal-containing nuclear protein OS=Mus musculus OX=10090 GN=Pcnp PE=1 SV=1	6	3	4	1857.45	1857.32	1437.39	999.502	962.896	1023.73	1705.27	995.062	1.71373	0.00350096	0.0487714	TRUE
Q64339	Ubiquitin-like protein ISG15 OS=Mus musculus OX=10090 GN=Isg15 PE=1 SV=4	6	4	6	1381.98	1456.06	1168.42	973.476	1049.71	1075.17	1329.72	1031.87	1.28866	0.0253032	0.11447	TRUE
Q99PL5	Ribosome-binding protein 1 OS=Mus musculus OX=10090 GN=Rrbp1 PE=1 SV=2	33	28	34	5682.18	5796.52	6042.24	7478.63	7394.76	7487.09	5838.39	7453.38	0.783322	0.000191327	0.0193134	TRUE
P51125-3	Isoform 3 of Calpastatin OS=Mus musculus OX=10090 GN=Cast	15	15	21	4022.57	3751.17	3461.56	2578.54	2669.71	2984.54	3738.07	2738.87	1.36482	0.00735086	0.0645993	TRUE
Q8BGD5	Carnitine O-palmitoyltransferase 1, brain isoform OS=Mus musculus OX=10090 GN=Cpt1c PE=1 SV=1	2	3	2	105.487	87.2332	104.851	133.383	138.628	114.737	98.8138	128.495	0.769011	0.0365193	0.137395	TRUE
O88967	ATP-dependent zinc metalloprotease YME1L1 OS=Mus musculus OX=10090 GN=Yme1l1 PE=1 SV=1	2	1	3	137.201	109.786	130.528	159.939	152.52	166.393	125.277	159.516	0.785353	0.0285139	0.121307	TRUE
Q9R1Q8	Transgelin-3 OS=Mus musculus OX=10090 GN=Tagln3 PE=1 SV=1	1		1	49.4757		46.2069	38.5668		38.7338	47.8134	38.6502	1.23708	0.0249427	0.114077	TRUE
P01887	Beta-2-microglobulin OS=Mus musculus OX=10090 GN=B2m PE=1 SV=2	2	2	2	747.827	797.774	788.19	1101.77	1058.4	1038.01	777.626	1065.73	0.729663	0.000285934	0.0216649	TRUE
Q9D6U8	Protein FAM162A OS=Mus musculus OX=10090 GN=Fam162a PE=1 SV=1	3	4	3	294.993	278.323	270.222	327.663	343.947	363.731	280.992	344.799	0.814943	0.0067082	0.0631603	TRUE
A6H630	Protein-glutamate O-methyltransferase OS=Mus musculus OX=10090 GN=Armt1 PE=1 SV=1	3	4	1	443.116	477.2	461.365	407.009	347.805	351.307	460.349	367.741	1.25183	0.0151818	0.0907952	TRUE
Q3TLH4	Protein PRRC2C OS=Mus musculus OX=10090 GN=Prrc2c PE=1 SV=3	10	14	17	2857.97	3046.61	3010.57	2484.13	2334.32	2547.09	2970.58	2453.54	1.21073	0.0041805	0.0516936	TRUE
Q61292	Laminin subunit beta-2 OS=Mus musculus OX=10090 GN=Lamb2 PE=1 SV=2	16	11	14	1276.24	1260.99	1274.13	1605.89	1589.08	1495.14	1270.44	1562.6	0.813027	0.000787359	0.0285891	TRUE
O35593	26S proteasome non-ATPase regulatory subunit 14 OS=Mus musculus OX=10090 GN=Psmd14 PE=1 SV=2	15	14	15	1621.19	1577.74	1812.41	2181.46	2124.05	1948.71	1667.41	2082.35	0.800733	0.0150335	0.0903052	TRUE
P28301	Protein-lysine 6-oxidase OS=Mus musculus OX=10090 GN=Lox PE=1 SV=1	2	1	1	43.1983	30.2851	38.8514	61.1168	65.5302	64.1231	37.0426	63.5632	0.582768	0.00731027	0.06443	TRUE
Q62009	Periostin OS=Mus musculus OX=10090 GN=Postn PE=1 SV=2	18	20	24	2050.51	2218.09	2356.35	3390.96	3320.69	3171.4	2204.76	3293.07	0.669514	0.000863043	0.0296986	TRUE
Q9QYH6	Melanoma-associated antigen D1 OS=Mus musculus OX=10090 GN=Maged1 PE=1 SV=1	2	2	5	350.131	282.572	308.595	362.949	393.162	377.265	312.547	377.59	0.827741	0.0464389	0.157086	TRUE
Q9WUH1	Transmembrane protein 115 OS=Mus musculus OX=10090 GN=Tmem115 PE=1 SV=1	1	1	1	25.3583	21.9308	24.1936	33.4607	31.3678	28.0655	23.7843	30.8838	0.770123	0.0174199	0.0977597	TRUE
Q9CXL3	Uncharacterized protein C7orf50 homolog OS=Mus musculus OX=10090 PE=1 SV=3	1	3	1	567.15	542.856	537.316	301.222	315.897	323.721	548.956	313.473	1.7512	3.12354e-05	0.00993088	TRUE
O55176	E3 ubiquitin-protein ligase Praja-1 OS=Mus musculus OX=10090 GN=Pja1 PE=1 SV=3	1	1	1	55.7484	69.4364	53.3277	145.635	112.717	153.23	59.1004	135.998	0.434568	0.00264921	0.044722	TRUE
Q8K5B2	Multiple coagulation factor deficiency protein 2 homolog OS=Mus musculus OX=10090 GN=Mcfd2 PE=1 SV=1	4	5	5	1326.73	1199.01	1295.41	825.429	897.556	830.385	1272.54	850.498	1.49623	0.000587453	0.0269767	TRUE
A2ARP1	Inositol hexakisphosphate and diphosphoinositol-pentakisphosphate kinase 1 OS=Mus musculus OX=10090 GN=Ppip5k1 PE=1 SV=1	1		1	70.5691		69.8475	87.2573		82.7809	70.2074	84.9896	0.82607	0.0191494	0.101379	TRUE
Q642K5	40S ribosomal protein S30 OS=Mus musculus OX=10090 GN=Fau PE=1 SV=1	1	1	2	1899.16	2002.89	1725.28	336.196	301.511	372.56	1872.23	335.504	5.58036	2.15554e-05	0.00993088	TRUE
Q6IFZ6	Keratin, type II cytoskeletal 1b OS=Mus musculus OX=10090 GN=Krt77 PE=1 SV=1	1	1	1	263.737	305.376	244.505	325.425	363.283	339.739	270.042	342.463	0.788529	0.0308269	0.125084	TRUE
A2A8L5	Receptor-type tyrosine-protein phosphatase F OS=Mus musculus OX=10090 GN=Ptprf PE=1 SV=1	7	15	11	809.302	829.757	862.759	1282.91	1234.61	1230.12	833.65	1248.99	0.667461	6.10769e-05	0.0124385	TRUE
Q99K41	EMILIN-1 OS=Mus musculus OX=10090 GN=Emilin1 PE=1 SV=1	3	1	1	27.4887	20.6155	24.7624	40.173	33.6132	41.0285	24.1202	38.1221	0.632708	0.012151	0.0826053	TRUE
Q8BK08	Transmembrane protein 11, mitochondrial OS=Mus musculus OX=10090 GN=Tmem11 PE=1 SV=1	1	2	3	40.9446	46.4567	48.1591	55.0374	56.5084	51.4547	45.079	54.2915	0.830314	0.0302874	0.124565	TRUE
P18911	Retinoic acid receptor gamma OS=Mus musculus OX=10090 GN=Rarg PE=1 SV=3	1	1	1	47.335	53.3792	55.2009	66.464	72.3873	67.1466	51.8601	68.6159	0.755804	0.00652977	0.0628038	TRUE
Q80ZK9	WD and tetratricopeptide repeats protein 1 OS=Mus musculus OX=10090 GN=Wdtc1 PE=1 SV=1	2	2	2	304.397	330.93	367.212	436.009	385.463	399.641	333.194	406.49	0.819687	0.0384577	0.141386	TRUE
Q920A5	Retinoid-inducible serine carboxypeptidase OS=Mus musculus OX=10090 GN=Scpep1 PE=1 SV=2	17	14	19	4806.32	4873.58	4706.4	6838.49	6641.62	6899.72	4794.94	6792.38	0.705929	2.23365e-05	0.00993088	TRUE
P63089	Pleiotrophin OS=Mus musculus OX=10090 GN=Ptn PE=1 SV=1		2	1		218.548	201.407		292.588	301.324	209.803	296.924	0.706588	0.0152636	0.0909185	TRUE
Q02788	Collagen alpha-2(VI) chain OS=Mus musculus OX=10090 GN=Col6a2 PE=1 SV=3	9	9	11	882.756	953.019	1030.82	1553.91	1525.38	1494.22	953.62	1524.31	0.625608	0.000528816	0.0257102	TRUE
B1B212	Histocompatibility antigen 60b OS=Mus musculus OX=10090 GN=H60b PE=2 SV=1	1	1	1	210.927	230.307	232.147	296.55	258.528	273.029	224.251	275.595	0.813698	0.0149081	0.0900283	TRUE
P12023	Amyloid-beta A4 protein OS=Mus musculus OX=10090 GN=App PE=1 SV=3	5	3	3	323.373	299.617	314.705	484.185	534.076	507.699	312.41	508.245	0.614683	0.000174454	0.0193134	TRUE
A6X935	Inter alpha-trypsin inhibitor, heavy chain 4 OS=Mus musculus OX=10090 GN=Itih4 PE=1 SV=2	1	1	5	444.006	475.874	489.771	564.211	552.249	590.184	469.488	568.663	0.8256	0.00546084	0.0590569	TRUE
Q8VEH3	ADP-ribosylation factor-like protein 8A OS=Mus musculus OX=10090 GN=Arl8a PE=1 SV=1	1	3	6	723.853	732.689	667.492	576.007	595.431	590.695	707.412	587.319	1.20448	0.00383944	0.049211	TRUE
Q5SRX1	TOM1-like protein 2 OS=Mus musculus OX=10090 GN=Tom1l2 PE=1 SV=1	5	8	7	1230.38	1149.98	1134.3	868.935	971.824	976.926	1170.81	937.876	1.24836	0.00833304	0.0677638	TRUE
P17665	Cytochrome c oxidase subunit 7C, mitochondrial OS=Mus musculus OX=10090 GN=Cox7c PE=1 SV=1	2	1	1	558.458	472.272	635.144	295.336	403.739	378.94	551.254	356.174	1.54771	0.0271764	0.118819	TRUE
O70439	Syntaxin-7 OS=Mus musculus OX=10090 GN=Stx7 PE=1 SV=3	2	6	3	202.325	189.252	183.032	156.588	160.994	158.288	191.369	158.613	1.20652	0.00355456	0.0487714	TRUE
B0V2N1	Receptor-type tyrosine-protein phosphatase S OS=Mus musculus OX=10090 GN=Ptprs PE=1 SV=1	5	6	1	137.804	128.897	141.55	179.977	179.737	195.19	135.979	184.829	0.7357	0.00140547	0.0334174	TRUE
P24549	Retinal dehydrogenase 1 OS=Mus musculus OX=10090 GN=Aldh1a1 PE=1 SV=5	1	5	4	384.278	460.624	434.504	286.011	293.463	272.844	425.267	283.977	1.49754	0.00216624	0.0424047	TRUE
Q60598	Src substrate cortactin OS=Mus musculus OX=10090 GN=Cttn PE=1 SV=2	13	18	20	7040.36	6639.27	6286.68	5290.84	5215.34	5613.83	6648.32	5370.59	1.23791	0.00578729	0.0598207	TRUE
P15702	Leukosialin OS=Mus musculus OX=10090 GN=Spn PE=1 SV=1	2	1	1	70.4861	64.0964	69.5215	83.2178	84.0811	89.7535	67.9755	85.6358	0.793774	0.00368077	0.0488406	TRUE
Q8CGY8	UDP-N-acetylglucosamine--peptide N-acetylglucosaminyltransferase 110 kDa subunit OS=Mus musculus OX=10090 GN=Ogt PE=1 SV=2	16	17	14	1991.17	2020.78	1926.98	2346.46	2410.99	2455.22	1979.26	2403.81	0.823383	0.000541786	0.0257102	TRUE
Q99LL3	Carbohydrate sulfotransferase 12 OS=Mus musculus OX=10090 GN=Chst12 PE=2 SV=2	1	1	1	56.5337	62.9666	55.7126	77.5918	73.1802	85.7984	58.3164	78.6858	0.74113	0.00770271	0.0657186	TRUE
Q9CQ62	2,4-dienoyl-CoA reductase, mitochondrial OS=Mus musculus OX=10090 GN=Decr1 PE=1 SV=1	4	4	2	552.076	548.568	580.093	388.284	423.149	402.334	560.07	404.337	1.38516	0.000438601	0.0235729	TRUE
P56390	Cyclin-dependent kinases regulatory subunit 2 OS=Mus musculus OX=10090 GN=Cks2 PE=1 SV=1	2	1	1	135.233	118.765	118.132	159.173	148.983	165.839	123.798	157.845	0.7843	0.0109102	0.0783791	TRUE
P62806	Histone H4 OS=Mus musculus OX=10090 GN=Hist1h4a PE=1 SV=2	8	7	5	1894.97	1921.1	1819.29	2692.05	2591.23	2518.53	1877.96	2599.63	0.722393	0.000211151	0.0193134	TRUE
O08709	Peroxiredoxin-6 OS=Mus musculus OX=10090 GN=Prdx6 PE=1 SV=3	2	3	2	300.009	310.598	314.084	254.254	253.757	232.306	308.172	246.556	1.24991	0.00244655	0.0439378	TRUE
Q9QWR8	Alpha-N-acetylgalactosaminidase OS=Mus musculus OX=10090 GN=Naga PE=1 SV=2	2	7	8	854.627	1019.8	1042.08	822.939	630.141	629.294	968.423	688.472	1.40663	0.0352754	0.134662	TRUE
Q9JK92	Heat shock protein beta-8 OS=Mus musculus OX=10090 GN=Hspb8 PE=1 SV=1	1	2	5	354.681	327.251	349.284	516.789	406.052	420.159	343.531	445.078	0.771844	0.0308872	0.125084	TRUE
P01029	Complement C4-B OS=Mus musculus OX=10090 GN=C4b PE=1 SV=3	1	4	2	892.987	835.707	881.485	439.065	557.458	482.278	869.704	490.546	1.77293	0.00137836	0.0334174	TRUE
Q8BWY9	Protein CIP2A OS=Mus musculus OX=10090 GN=Cip2a PE=1 SV=3	10	10	6	1166.22	1110.74	1106.69	1361.88	1328.81	1435.52	1127.56	1374.69	0.82023	0.00220709	0.0427552	TRUE
Q91V36	Nuclear receptor-binding protein 2 OS=Mus musculus OX=10090 GN=Nrbp2 PE=1 SV=2	1	1		171.428	174.17		116.016	120.377		172.793	118.176	1.46216	0.00278319	0.0456866	TRUE
A3KGW5	Inactive glycosyltransferase 25 family member 3 OS=Mus musculus OX=10090 GN=Cercam PE=3 SV=1	2	2	2	420.639	479.977	458.52	581.349	549.784	573.73	452.372	568.127	0.796252	0.00569424	0.0595353	TRUE
Q6DFW4	Nucleolar protein 58 OS=Mus musculus OX=10090 GN=Nop58 PE=1 SV=1	3	7	6	1061.02	1083.59	1091.12	865.416	811.518	817.1	1078.5	830.997	1.29784	0.000293191	0.0216649	TRUE
Q60865	Caprin-1 OS=Mus musculus OX=10090 GN=Caprin1 PE=1 SV=2	7	8	8	2451.98	2558.19	2755.95	2136.96	2125.45	2186.8	2585.67	2149.57	1.20288	0.00634238	0.0618229	TRUE
P05202	Aspartate aminotransferase, mitochondrial OS=Mus musculus OX=10090 GN=Got2 PE=1 SV=1	24	25	28	13955.6	13541.8	11817.5	10606.1	11021.8	10961.9	13071.2	10861.7	1.20342	0.0243702	0.112656	TRUE
O35143	ATPase inhibitor, mitochondrial OS=Mus musculus OX=10090 GN=ATP5IF1 PE=1 SV=2	4	1	2	440.773	440.859	500.407	405.614	383.84	339.547	459.846	375.308	1.22525	0.0394458	0.143842	TRUE
A0A2I3BQS6	E3 ubiquitin-protein ligase UBR5 OS=Mus musculus OX=10090 GN=Ubr5 PE=1 SV=1	7	5	8	471.172	475.512	522.262	596.991	632.969	598.177	489.114	609.153	0.80294	0.00449658	0.0535929	TRUE
P70460	Vasodilator-stimulated phosphoprotein OS=Mus musculus OX=10090 GN=Vasp PE=1 SV=4	4	4	4	1168.6	1097.38	1325.72	953.395	981.605	865.982	1193.51	932.337	1.28013	0.0213481	0.105678	TRUE
Q8C0J6	Ankyrin repeat domain-containing protein SOWAHC OS=Mus musculus OX=10090 GN=Sowahc PE=1 SV=2	3	3	1	100.431	105.304	111.042	82.725	84.2009	73.4341	105.503	79.9743	1.31922	0.00590884	0.0602985	TRUE
O89017	Legumain OS=Mus musculus OX=10090 GN=Lgmn PE=1 SV=1	4	5	3	239.461	219.081	275.893	502.294	464.168	483.338	243.703	483.016	0.504544	0.000645301	0.0270382	TRUE
Q9Z0M5	Lysosomal acid lipase/cholesteryl ester hydrolase OS=Mus musculus OX=10090 GN=Lipa PE=1 SV=2	2	3	1	224.211	235.502	216.904	275.821	275.555	285.486	225.41	278.916	0.808164	0.00131615	0.0328555	TRUE
Q8BM72	Heat shock 70 kDa protein 13 OS=Mus musculus OX=10090 GN=Hspa13 PE=1 SV=1	6	3	4	833.441	731.14	753.867	960.402	965.524	992.568	771.596	972.73	0.793227	0.00476925	0.0553692	TRUE
Q8BGT7	Survival of motor neuron-related-splicing factor 30 OS=Mus musculus OX=10090 GN=Smndc1 PE=1 SV=1	2	3	3	497.433	480.459	543.45	411.204	394.375	357.157	506.427	386.909	1.30891	0.00838919	0.0678934	TRUE
H3BL37	Treacle protein OS=Mus musculus OX=10090 GN=Tcof1 PE=1 SV=1	3	4	3	473.074	471.51	480.576	594.946	611.736	590.011	475.037	598.826	0.793281	4.85718e-05	0.0117861	TRUE
P15105	Glutamine synthetase OS=Mus musculus OX=10090 GN=Glul PE=1 SV=6	5	9	5	906.351	960.868	864.657	1151.38	1087.36	1057.45	909.776	1098.04	0.828549	0.00887938	0.0699132	TRUE
P53612	Geranylgeranyl transferase type-2 subunit beta OS=Mus musculus OX=10090 GN=Rabggtb PE=1 SV=2	1	1	1	308.747	304.796	299.112	258.878	222.655	244.114	304.193	241.42	1.26001	0.00671409	0.0631603	TRUE
F2Z3U3	Ras association (RalGDS/AF-6) and pleckstrin homology domains 1 OS=Mus musculus OX=10090 GN=Raph1 PE=1 SV=2	4	4	8	495.513	510.805	459.587	400.826	382.818	427.73	488.157	403.372	1.21019	0.013234	0.0860781	TRUE
Q05895	Thrombospondin-3 OS=Mus musculus OX=10090 GN=Thbs3 PE=1 SV=2	2	1	3	363.286	319.588	409.333	463.429	536.865	527.545	362.22	508.201	0.712748	0.0164751	0.0951531	TRUE
Q9WV91	Prostaglandin F2 receptor negative regulator OS=Mus musculus OX=10090 GN=Ptgfrn PE=1 SV=2	6	5	6	931.609	942.654	947.93	1172.15	1148.73	1126.71	940.706	1149.05	0.818684	8.93924e-05	0.0139571	TRUE
Q8BTJ4	Bis(5'-adenosyl)-triphosphatase enpp4 OS=Mus musculus OX=10090 GN=Enpp4 PE=1 SV=1	2	2	2	57.865	57.0279	61.9673	87.1109	80.7855	64.5124	58.9145	76.8569	0.766547	0.047099	0.158372	TRUE
P28667	MARCKS-related protein OS=Mus musculus OX=10090 GN=Marcksl1 PE=1 SV=2	6	7	6	957.625	1034.18	1006.75	832.573	769.99	830.512	999.014	810.496	1.2326	0.00359806	0.0487714	TRUE
Q8K124	Pleckstrin homology domain-containing family O member 2 OS=Mus musculus OX=10090 GN=Plekho2 PE=1 SV=1	5	6	5	419.134	397.519	391.178	307.981	319.729	323.379	402.434	316.961	1.26967	0.000728603	0.0273022	TRUE
P08121	Collagen alpha-1(III) chain OS=Mus musculus OX=10090 GN=Col3a1 PE=1 SV=4	27	21	19	3247.86	3055.02	3261.79	5019.74	5057.65	5110.61	3186.81	5062.53	0.629489	2.90082e-05	0.00993088	TRUE
Q99PG2	Opioid growth factor receptor OS=Mus musculus OX=10090 GN=Ogfr PE=1 SV=1	6	8	8	1735.87	1348.02	1515.25	912.46	1018.89	915.804	1524.87	947.797	1.60886	0.00430683	0.0525344	TRUE
Q80WB5	Protein N-terminal glutamine amidohydrolase OS=Mus musculus OX=10090 GN=Wdyhv1 PE=1 SV=1	1	1	1	30.8062	37.8407	33.1784	43.7171	38.8348	41.7948	33.8182	41.3998	0.816869	0.0433576	0.150546	TRUE
Q8CD10	Calcium uptake protein 2, mitochondrial OS=Mus musculus OX=10090 GN=Micu2 PE=1 SV=2	3	2	3	250.385	251.213	227.264	200.663	199.412	191.887	242.695	197.283	1.23019	0.00439121	0.0531484	TRUE
Q61686	Chromobox protein homolog 5 OS=Mus musculus OX=10090 GN=Cbx5 PE=1 SV=1	3	3	1	59.5552	82.8172	67.1966	104.02	101.92	106.038	69.2037	103.979	0.665552	0.0137221	0.0878066	TRUE
Q8BQ89	LIX1-like protein OS=Mus musculus OX=10090 GN=Lix1l PE=2 SV=2	2	4	2	234.011	250.594	289.955	450.841	402.06	434.816	257.146	428.753	0.599752	0.00204325	0.0407258	TRUE
Q8K2I4	Beta-mannosidase OS=Mus musculus OX=10090 GN=Manba PE=1 SV=1	6	12	11	2029.34	2049.18	2047.23	1583.61	1727.96	1582.29	2041.9	1629.88	1.25279	0.00155329	0.0354908	TRUE
Q922Q1	Mitochondrial amidoxime reducing component 2 OS=Mus musculus OX=10090 GN=Marc2 PE=1 SV=1	6	3	2	564.778	578.745	529.44	740.278	741.716	858.208	557.264	778.171	0.71612	0.00389387	0.0492628	TRUE
Q9CQS8	Protein transport protein Sec61 subunit beta OS=Mus musculus OX=10090 GN=Sec61b PE=1 SV=3	3	2	3	976.679	925.619	1107.52	821.959	759.031	752.447	1000.41	777.192	1.28721	0.0137176	0.0878066	TRUE
P19182	Interferon-related developmental regulator 1 OS=Mus musculus OX=10090 GN=Ifrd1 PE=1 SV=2	1	1	1	201.412	186.994	174.536	117.97	124.88	123.557	187.327	122.098	1.53423	0.000675702	0.0270382	TRUE
Q9WTL7	Acyl-protein thioesterase 2 OS=Mus musculus OX=10090 GN=Lypla2 PE=1 SV=1	1	6	3	435.33	398.98	396.249	330.751	321.124	317.27	409.807	322.999	1.26876	0.00189249	0.0392232	TRUE
O88322	Nidogen-2 OS=Mus musculus OX=10090 GN=Nid2 PE=1 SV=2	6	6	4	405.424	456.088	526.456	644.57	619.328	568.906	460.016	610.113	0.753985	0.0282906	0.121238	TRUE
Q61391	Neprilysin OS=Mus musculus OX=10090 GN=Mme PE=1 SV=3	12	10	13	2294.79	2507.27	2463.76	1695.66	1622.48	1477.24	2420.18	1595.84	1.51656	0.00103882	0.0310567	TRUE
Q9DBY1	E3 ubiquitin-protein ligase synoviolin OS=Mus musculus OX=10090 GN=Syvn1 PE=1 SV=3		1	1		30.3773	34.7951		47.5446	48.3611	32.5113	47.9511	0.678008	0.0296319	0.123594	TRUE
Q80VP1	Epsin-1 OS=Mus musculus OX=10090 GN=Epn1 PE=1 SV=3	4	5	3	362.479	362.119	357.465	307.131	317.675	277.958	360.681	300.443	1.2005	0.0105842	0.0771017	TRUE
Q0KL02	Triple functional domain protein OS=Mus musculus OX=10090 GN=Trio PE=1 SV=3	5	3	5	224.292	231.093	215.735	191.338	174.815	184.555	223.618	183.443	1.219	0.00385536	0.049211	TRUE
Q8BQY8	Checkpoint protein HUS1 OS=Mus musculus OX=10090 GN=Hus1 PE=2 SV=1	2	1	1	80.0419	80.6115	77.5792	92.662	106.611	101.553	79.3999	100.107	0.793149	0.00561989	0.0593865	TRUE
Q8CI51	PDZ and LIM domain protein 5 OS=Mus musculus OX=10090 GN=Pdlim5 PE=1 SV=4	24	19	17	4209.91	4461.1	4622.08	3832.58	3580.22	3517.01	4427.76	3640.76	1.21617	0.00660075	0.0629128	TRUE
P12787	Cytochrome c oxidase subunit 5A, mitochondrial OS=Mus musculus OX=10090 GN=Cox5a PE=1 SV=2	3	2	3	503.059	476.072	545.869	613.861	594.286	624.693	507.528	610.817	0.830901	0.0119232	0.0820421	TRUE
Q9R0P6	Signal peptidase complex catalytic subunit SEC11A OS=Mus musculus OX=10090 GN=Sec11a PE=1 SV=1	4	1	2	144.162	136.029	148.199	169.7	175.595	171.173	142.706	172.138	0.829022	0.00233817	0.0439238	TRUE
B2RRE7	OTU domain-containing protein 4 OS=Mus musculus OX=10090 GN=Otud4 PE=1 SV=1	2	2	2	215.394	213.009	217.768	176.756	161.082	161.64	215.382	166.338	1.29485	0.00113984	0.0320409	TRUE
Q8C142	Low density lipoprotein receptor adapter protein 1 OS=Mus musculus OX=10090 GN=Ldlrap1 PE=1 SV=3	1	4	3	177.459	153.574	169.846	130.037	143.381	117.54	166.657	129.892	1.28305	0.0252977	0.11447	TRUE
Q9D7X8	Gamma-glutamylcyclotransferase OS=Mus musculus OX=10090 GN=Ggct PE=1 SV=1	2	2	3	630.195	560.473	518.044	423.217	459.822	481.005	567.717	454.047	1.25035	0.0305703	0.124731	TRUE
Q8K2B0	Endoplasmic reticulum protein SC65 OS=Mus musculus OX=10090 GN=P3h4 PE=1 SV=1	2	2	4	132.15	158.188	151.903	177.833	171.362	189.169	146.984	179.305	0.819741	0.0321166	0.127487	TRUE
P84104	Serine/arginine-rich splicing factor 3 OS=Mus musculus OX=10090 GN=Srsf3 PE=1 SV=1	2	4	2	1563.94	1613.6	1675.46	1282	1344.49	1356.14	1617.02	1327.14	1.21843	0.00172881	0.03784	TRUE
Q2PZL6	Protocadherin Fat 4 OS=Mus musculus OX=10090 GN=Fat4 PE=1 SV=2	18	17	19	2029.2	2073.04	1933	2680.7	2691.13	2775.27	2010.89	2715.37	0.740558	0.000213071	0.0193134	TRUE
A0A0A6YY47	Neural cell adhesion molecule 1 OS=Mus musculus OX=10090 GN=Ncam1 PE=1 SV=1	2	1	1	194.209	194.891	164.842	213.231	242.052	220.161	184.095	224.819	0.818859	0.0407858	0.146167	TRUE
Q6PGG6	Guanine nucleotide-binding protein-like 3-like protein OS=Mus musculus OX=10090 GN=Gnl3l PE=1 SV=1	2	1	2	62.0032	79.6596	84.5466	108.691	101.873	106.834	74.7451	105.76	0.706742	0.0231818	0.109791	TRUE
Q80XU3	Nuclear ubiquitous casein and cyclin-dependent kinase substrate 1 OS=Mus musculus OX=10090 GN=Nucks1 PE=1 SV=1	5	3	11	993.418	1137.76	951	716.686	649.849	795.453	1024.36	718.211	1.42627	0.0111112	0.0789753	TRUE
Q8K201	Keratinocyte-associated transmembrane protein 2 OS=Mus musculus OX=10090 GN=Kct2 PE=1 SV=2	1	1	1	109.646	104.81	113.766	189.412	180.486	170.744	109.346	180.052	0.607302	0.00019911	0.0193134	TRUE
Q9R087	Glypican-6 OS=Mus musculus OX=10090 GN=Gpc6 PE=1 SV=1		2	8		225.522	241.83		396.755	382.955	233.533	389.794	0.59912	0.00578641	0.0598207	TRUE
Q9DD18	D-aminoacyl-tRNA deacylase 1 OS=Mus musculus OX=10090 GN=Dtd1 PE=1 SV=2	1	1	1	706.614	689.102	638.298	529.743	568.406	550.578	677.376	549.348	1.23305	0.00467655	0.0551208	TRUE
Q8VHG0	Dimethylaniline monooxygenase [N-oxide-forming] 4 OS=Mus musculus OX=10090 GN=Fmo4 PE=1 SV=3	2	2	2	158.223	164.153	139.507	97.941	112.291	108.575	153.593	106.091	1.44774	0.00448966	0.0535929	TRUE
Q9ERE7	LRP chaperone MESD OS=Mus musculus OX=10090 GN=Mesd PE=1 SV=1	10	11	10	3260.39	3348.93	3222.87	2586.41	2741.6	2606.46	3276.97	2643.94	1.23943	0.000567326	0.0263104	TRUE
Q08288	Cell growth-regulating nucleolar protein OS=Mus musculus OX=10090 GN=Lyar PE=1 SV=2	6	2	3	290.647	310.77	322.244	249.574	248.747	270.888	307.607	256.202	1.20064	0.0112792	0.0795135	TRUE
Q9QZF2	Glypican-1 OS=Mus musculus OX=10090 GN=Gpc1 PE=1 SV=1	6	11	12	1422.13	1481.37	1498.71	1752.54	1773.42	1777.24	1467.03	1767.7	0.829912	0.000348646	0.0226201	TRUE
Q9R078	5'-AMP-activated protein kinase subunit beta-1 OS=Mus musculus OX=10090 GN=Prkab1 PE=1 SV=2	2	5	6	273.678	276.632	286.463	208.856	244.432	236.204	278.871	229.314	1.21611	0.017014	0.0967158	TRUE
P11087	Collagen alpha-1(I) chain OS=Mus musculus OX=10090 GN=Col1a1 PE=1 SV=4	25	32	34	3205.98	3088.81	3455	4521.32	4400.98	4713.95	3246.38	4543.6	0.714496	0.000950521	0.0304948	TRUE
Q60648	Ganglioside GM2 activator OS=Mus musculus OX=10090 GN=Gm2a PE=1 SV=2	5	5	6	1084.84	1174.61	1068.46	915.518	875.287	862.158	1108.34	884.032	1.25373	0.00279118	0.0456866	TRUE
Q61823	Programmed cell death protein 4 OS=Mus musculus OX=10090 GN=Pdcd4 PE=1 SV=1	7	3	6	479.871	512.436	697.92	2806.1	2411.06	2276.66	555.721	2488.11	0.223351	0.000335342	0.0226201	TRUE
Q9DBV4	Matrix remodeling-associated protein 8 OS=Mus musculus OX=10090 GN=Mxra8 PE=1 SV=1	3	5	4	808.158	764.687	708.243	894.825	939.658	944.693	759.254	926.118	0.819825	0.00908354	0.0702101	TRUE
Q91V01	Lysophospholipid acyltransferase 5 OS=Mus musculus OX=10090 GN=Lpcat3 PE=1 SV=1	1	2	2	162.786	189.293	173.062	237.253	214.261	229.924	174.71	226.941	0.769846	0.0079349	0.0666076	TRUE
Q3UMC0	Spermatogenesis-associated protein 5 OS=Mus musculus OX=10090 GN=Spata5 PE=1 SV=2	6	5	5	289.019	308.176	310.151	258.04	232.007	243.849	302.296	244.401	1.23689	0.00505662	0.056528	TRUE
Q9D7V9	N-acylethanolamine-hydrolyzing acid amidase OS=Mus musculus OX=10090 GN=Naaa PE=1 SV=2	2	3	6	192.23	188.805	170.054	234.172	246.145	266.439	183.431	248.566	0.73796	0.00477565	0.0553692	TRUE
Q8R079	Bifunctional apoptosis regulator OS=Mus musculus OX=10090 GN=Bfar PE=1 SV=1	1	1	1	33.3726	32.844	35.2487	41.1425	44.4905	42.6065	33.8062	42.7246	0.791258	0.00167507	0.0373262	TRUE
Q5Y5T1	Palmitoyltransferase ZDHHC20 OS=Mus musculus OX=10090 GN=Zdhhc20 PE=1 SV=1		1	1		86.7437	87.2147		112.419	106.431	86.9789	109.384	0.79517	0.0140949	0.0886184	TRUE
O88983	Syntaxin-8 OS=Mus musculus OX=10090 GN=Stx8 PE=1 SV=1	2	3	2	70.8153	79.2723	75.2879	82.7759	102.271	89.4536	75.0455	91.149	0.823328	0.0496556	0.163448	TRUE
Q00560	Interleukin-6 receptor subunit beta OS=Mus musculus OX=10090 GN=Il6st PE=1 SV=2	2	2	2	239.998	249.74	270.545	310.138	327.316	300.396	253.111	312.42	0.810164	0.00821733	0.067645	TRUE
Q8VHM5	Heterogeneous nuclear ribonucleoprotein R OS=Mus musculus OX=10090 GN=Hnrnpr PE=1 SV=1	7	6	6	670.393	699.908	680.029	565.831	524.611	530.212	683.334	539.914	1.26564	0.000927049	0.0304948	TRUE
Q61792	LIM and SH3 domain protein 1 OS=Mus musculus OX=10090 GN=Lasp1 PE=1 SV=1	11	10	14	2055.23	2102.8	2161.11	1614.18	1606.88	1517.47	2105.94	1578.89	1.33381	0.00030527	0.0216649	TRUE
P02798	Metallothionein-2 OS=Mus musculus OX=10090 GN=Mt2 PE=1 SV=2	3	2	4	218.79	162.654	227.428	90.9837	134.711	70.9894	200.776	95.467	2.1031	0.0256597	0.114904	TRUE
P10649	Glutathione S-transferase Mu 1 OS=Mus musculus OX=10090 GN=Gstm1 PE=1 SV=2	13	16	15	7557.3	7831.92	7430.26	6387.64	6374.51	5832.01	7604.66	6192.53	1.22804	0.00369307	0.0488653	TRUE
Q9Z0L8	Gamma-glutamyl hydrolase OS=Mus musculus OX=10090 GN=Ggh PE=1 SV=2	3	5	4	697.288	678.141	671.475	821.796	859.154	908.878	682.214	862.542	0.790935	0.00168702	0.0373262	TRUE
O70311	Glycylpeptide N-tetradecanoyltransferase 2 OS=Mus musculus OX=10090 GN=Nmt2 PE=1 SV=1	4	1		307.319	316.625		397.991	447.136		311.937	421.849	0.739453	0.037429	0.139494	TRUE
P56375	Acylphosphatase-2 OS=Mus musculus OX=10090 GN=Acyp2 PE=1 SV=2	3	2	4	219.134	194.833	215.828	245.291	283.368	251.084	209.649	259.389	0.808244	0.0213624	0.105678	TRUE
P09528	Ferritin heavy chain OS=Mus musculus OX=10090 GN=Fth1 PE=1 SV=2	7	6	6	1253.95	1274.77	1075.43	976.348	936.405	993.223	1197.93	968.363	1.23707	0.0201415	0.103119	TRUE
Q9CQQ7	ATP synthase F(0) complex subunit B1, mitochondrial OS=Mus musculus OX=10090 GN=Atp5f1 PE=1 SV=1	5	4	5	851.528	750.878	820.312	942.411	1083.85	980.072	806.459	1000.36	0.806169	0.0182416	0.0997007	TRUE
Q8BVU5	ADP-ribose pyrophosphatase, mitochondrial OS=Mus musculus OX=10090 GN=Nudt9 PE=1 SV=1	3	3	2	843.629	802.041	772.442	627.015	638.907	674.913	805.511	646.628	1.24571	0.00287796	0.0457877	TRUE
P48024	Eukaryotic translation initiation factor 1 OS=Mus musculus OX=10090 GN=Eif1 PE=1 SV=2	5	4	7	1323.4	1309.89	1382.91	1155.32	1068.42	1038.18	1338.36	1086.19	1.23216	0.00440549	0.0531838	TRUE
O55239	Nicotinamide N-methyltransferase OS=Mus musculus OX=10090 GN=Nnmt PE=1 SV=1	1	2	3	120.277	123.597	110.76	92.5162	79.1069	87.7679	118.084	86.2825	1.36858	0.00517577	0.0569292	TRUE
Q62165	Dystroglycan OS=Mus musculus OX=10090 GN=Dag1 PE=1 SV=4	6	3	8	594.292	570.37	579.119	731.451	684.127	734.756	581.177	716.399	0.811247	0.00129811	0.0328555	TRUE
Q3U4S0	Pantothenate kinase 2 OS=Mus musculus OX=10090 GN=Pank2 PE=1 SV=1	2	1	1	126.707	128.68	126.663	81.5104	88.1373	110.814	127.347	92.6807	1.37404	0.02623	0.116346	TRUE
Q9CQJ6	Density-regulated protein OS=Mus musculus OX=10090 GN=Denr PE=1 SV=1	3	2	5	726.047	686.46	627.304	474.711	470.244	594.778	678.713	510.156	1.3304	0.0313319	0.126038	TRUE
Q9CXR1	Dehydrogenase/reductase SDR family member 7 OS=Mus musculus OX=10090 GN=Dhrs7 PE=1 SV=2	3	5	3	644.387	726.278	699.714	626.15	551.175	510.194	689.271	560.49	1.22977	0.040711	0.146123	TRUE
P17809	Solute carrier family 2, facilitated glucose transporter member 1 OS=Mus musculus OX=10090 GN=Slc2a1 PE=1 SV=4	4	5	4	470.008	463.138	554.848	702.906	663.7	650.236	494.307	671.914	0.73567	0.00795008	0.0666157	TRUE
O09111	NADH dehydrogenase [ubiquinone] 1 beta subcomplex subunit 11, mitochondrial OS=Mus musculus OX=10090 GN=Ndufb11 PE=1 SV=2	1	1	1	64.0697	61.9199	69.4241	83.1894	85.5919	79.5781	65.0625	82.7494	0.78626	0.00385018	0.049211	TRUE
Q61543	Golgi apparatus protein 1 OS=Mus musculus OX=10090 GN=Glg1 PE=1 SV=1	8	10	8	1312.53	1235.12	1237.42	1529.35	1560.82	1602.22	1261.18	1563.84	0.806465	0.000868641	0.0296986	TRUE
Q60932	Voltage-dependent anion-selective channel protein 1 OS=Mus musculus OX=10090 GN=Vdac1 PE=1 SV=3	8	10	8	1597.03	1643.47	1771.93	2207.2	2018.51	1990.97	1669.19	2070.04	0.806357	0.00860616	0.0692634	TRUE
Q91V98	Endosialin OS=Mus musculus OX=10090 GN=Cd248 PE=1 SV=1	1	3	1	274.086	220.973	259.84	352.935	371.441	319.042	250.598	347.118	0.721939	0.0143641	0.0889317	TRUE
A0A0G2JG52	Crystallin beta-gamma domain-containing 1 OS=Mus musculus OX=10090 GN=Crybg1 PE=1 SV=1	4	4	5	354.708	304.316	359.885	409.396	402.82	409.19	338.678	407.124	0.831878	0.0269306	0.118444	TRUE
E9Q852	Afadin OS=Mus musculus OX=10090 GN=Afdn PE=1 SV=2	3	1	2	292.908	248.215	259.554	226.691	221.008	207.354	266.233	218.199	1.22014	0.0238919	0.111684	TRUE
Q9CRB9	MICOS complex subunit Mic19 OS=Mus musculus OX=10090 GN=Chchd3 PE=1 SV=1	3	5	4	481.678	485.054	519.482	641.319	674.461	671.23	495.115	662.167	0.747719	0.000553816	0.0259408	TRUE
Q9Z0F8	Disintegrin and metalloproteinase domain-containing protein 17 OS=Mus musculus OX=10090 GN=Adam17 PE=1 SV=3	1	1	4	116.41	117.743	110.506	158.901	128.558	132.198	114.842	139.257	0.824678	0.0496958	0.163466	TRUE
Q00993	Tyrosine-protein kinase receptor UFO OS=Mus musculus OX=10090 GN=Axl PE=1 SV=2	6	3	8	393.845	385.948	437.82	525.447	545.873	512.736	405.244	527.843	0.767736	0.00359422	0.0487714	TRUE
P21981	Protein-glutamine gamma-glutamyltransferase 2 OS=Mus musculus OX=10090 GN=Tgm2 PE=1 SV=4	3	5	4	297.557	305.445	311.235	234.113	238.46	227.773	304.694	233.407	1.30542	0.000138883	0.0175818	TRUE
Q62470	Integrin alpha-3 OS=Mus musculus OX=10090 GN=Itga3 PE=1 SV=1	6	15	12	1230.29	1335.57	1309.77	1617.26	1536.06	1604.66	1291.09	1585.59	0.814264	0.00223389	0.0428321	TRUE
P14824	Annexin A6 OS=Mus musculus OX=10090 GN=Anxa6 PE=1 SV=3	3	2	1	105.785	95.6461	94.9383	110.518	118.079	128.77	98.6684	118.889	0.829923	0.0297094	0.123697	TRUE
Q3TQC7	Ectonucleoside triphosphate diphosphohydrolase 5 OS=Mus musculus OX=10090 GN=Entpd5 PE=1 SV=1	2	2	4	135.038	155.25	156.369	115.549	124.975	121.498	148.552	120.611	1.23167	0.017037	0.0967286	TRUE
Q61029	Lamina-associated polypeptide 2, isoforms beta/delta/epsilon/gamma OS=Mus musculus OX=10090 GN=Tmpo PE=1 SV=4	2	1	3	301.224	340.5	316.559	261.935	265.128	251.557	319.022	259.475	1.22949	0.00608388	0.0607584	TRUE
P09041	Phosphoglycerate kinase 2 OS=Mus musculus OX=10090 GN=Pgk2 PE=1 SV=4	1	1	1	9.73698	13.1743	7.30281	24.3776	18.3835	19.1876	9.78469	20.4871	0.477603	0.0182081	0.0997007	TRUE
P23949	mRNA decay activator protein ZFP36L2 OS=Mus musculus OX=10090 GN=Zfp36l2 PE=1 SV=2	1	2	2	355.922	362.824	321.141	222.689	286.903	228.027	346.138	244.234	1.41724	0.0174297	0.0977597	TRUE
P19783	Cytochrome c oxidase subunit 4 isoform 1, mitochondrial OS=Mus musculus OX=10090 GN=Cox4i1 PE=1 SV=2	4	5	4	1123.27	1085.32	1247.87	1410.11	1436.65	1348.27	1150.1	1397.85	0.822764	0.0132692	0.0860843	TRUE
Q9JLV6	Bifunctional polynucleotide phosphatase/kinase OS=Mus musculus OX=10090 GN=Pnkp PE=1 SV=2	3	3	2	82.3328	77.2427	80.1292	70.7277	58.1969	62.2311	79.8743	63.5086	1.25769	0.0188773	0.101053	TRUE
Q8BP71	RNA binding protein fox-1 homolog 2 OS=Mus musculus OX=10090 GN=Rbfox2 PE=1 SV=2	1	2	2	199.058	194.001	201.886	243.261	278.965	243.085	198.288	254.562	0.77894	0.00613266	0.0608588	TRUE
Q31125	Zinc transporter SLC39A7 OS=Mus musculus OX=10090 GN=Slc39a7 PE=1 SV=2	1	4	3	916.929	838.354	920.521	694.388	734.635	686.959	891.112	705.02	1.26395	0.00317058	0.0467013	TRUE
P40936	Indolethylamine N-methyltransferase OS=Mus musculus OX=10090 GN=Inmt PE=1 SV=1	3	2	3	569.411	586.376	542.47	351.335	367.451	306.331	565.795	340.699	1.66069	0.00102153	0.0310567	TRUE
Q61140	Breast cancer anti-estrogen resistance protein 1 OS=Mus musculus OX=10090 GN=Bcar1 PE=1 SV=2	11	11	9	1717.09	1918.88	1800.63	1538.42	1455.04	1411.24	1810.32	1467.29	1.23378	0.00681753	0.0632065	TRUE
Q8K199	COX assembly mitochondrial protein 2 homolog OS=Mus musculus OX=10090 GN=Cmc2 PE=3 SV=1	1	1	1	53.3136	63.5126	64.585	41.6524	47.9812	49.9304	60.2481	46.383	1.29893	0.0337043	0.130821	TRUE
Q3UMF0	Cordon-bleu protein-like 1 OS=Mus musculus OX=10090 GN=Cobll1 PE=1 SV=2	10	10	11	1564.9	1452.82	1425.6	1143.04	1175.31	1129.71	1479.9	1149.19	1.28777	0.00119533	0.0320461	TRUE
Q8K183	Pyridoxal kinase OS=Mus musculus OX=10090 GN=Pdxk PE=1 SV=1	8	5	7	895.893	909.604	913.415	721.392	749.739	728.755	906.273	733.198	1.23606	8.15742e-05	0.0139571	TRUE
Q9CX60	Protein LBH OS=Mus musculus OX=10090 GN=Lbh PE=1 SV=1	1	1	2	117.022	109.135	113.177	92.474	95.2396	94.9457	113.065	94.2116	1.20012	0.00119816	0.0320461	TRUE
Q9R0Q6	Actin-related protein 2/3 complex subunit 1A OS=Mus musculus OX=10090 GN=Arpc1a PE=1 SV=1	2	1	2	293.035	298.263	292.614	235.696	236.102	232.003	294.626	234.593	1.2559	1.04624e-05	0.00865893	TRUE
Q61635	GTP-binding protein OS=Mus musculus OX=10090 GN=Ifi47 PE=1 SV=1	5	5	3	533.194	556.452	511.815	411.677	453.382	413.299	533.509	425.692	1.25328	0.00472616	0.055334	TRUE
P48962	ADP/ATP translocase 1 OS=Mus musculus OX=10090 GN=Slc25a4 PE=1 SV=4	18	16	12	7486.99	6635.31	7199.48	8348.19	8396.17	9121.15	7098.34	8614.72	0.823978	0.0132499	0.0860781	TRUE
Q61335	B-cell receptor-associated protein 31 OS=Mus musculus OX=10090 GN=Bcap31 PE=1 SV=4	21	13	14	4302.58	4011.12	3710.28	4716.29	5181.18	5823.57	4000.68	5220.83	0.766292	0.0233137	0.110082	TRUE
O08663	Methionine aminopeptidase 2 OS=Mus musculus OX=10090 GN=Metap2 PE=1 SV=1	4	4	6	1330.39	1329.35	1335.32	1058.43	1086.79	1081.24	1331.69	1075.41	1.2383	1.29612e-05	0.0086729	TRUE
Q6DFV1	Condensin-2 complex subunit G2 OS=Mus musculus OX=10090 GN=Ncapg2 PE=1 SV=2	5	5	4	575.726	565.754	635.929	459.087	462.75	440.099	591.676	453.869	1.30363	0.00258948	0.044722	TRUE
Q3V1T4	Prolyl 3-hydroxylase 1 OS=Mus musculus OX=10090 GN=P3h1 PE=1 SV=2	2	5	4	550.841	537.071	522.653	652.641	623.951	694.182	536.732	656.296	0.81782	0.0042858	0.0524759	TRUE
Q9EPL2	Calsyntenin-1 OS=Mus musculus OX=10090 GN=Clstn1 PE=1 SV=1	6	6	5	639.152	561.105	663.634	749.954	821.822	756.104	619.715	775.291	0.799333	0.0188007	0.100893	TRUE
Q8BU33	Acetolactate synthase-like protein OS=Mus musculus OX=10090 GN=Ilvbl PE=1 SV=1	5	3	3	169.825	186.683	163.633	198.582	213.093	217.143	173.111	209.452	0.826497	0.016239	0.0946061	TRUE
P18406	Protein CYR61 OS=Mus musculus OX=10090 GN=Cyr61 PE=1 SV=1	2	3	3	55.2579	69.9241	72.6613	122.721	128.553	117.345	65.48	122.788	0.533277	0.0021676	0.0424047	TRUE
Q9D710	Thioredoxin-related transmembrane protein 2 OS=Mus musculus OX=10090 GN=Tmx2 PE=1 SV=1	2	2	4	282.456	295.098	308.104	370.363	355.33	381.041	295.033	368.76	0.800069	0.00229643	0.0435484	TRUE
O88531	Palmitoyl-protein thioesterase 1 OS=Mus musculus OX=10090 GN=Ppt1 PE=1 SV=2	3	6	7	751.75	765.436	821.491	975.787	977.015	944.898	778.984	965.785	0.806581	0.00181369	0.0389155	TRUE
Q3TRM4	Neuropathy target esterase OS=Mus musculus OX=10090 GN=Pnpla6 PE=1 SV=2	1	4	2	184.575	181.842	199.95	239.499	213.473	246.171	188.624	232.61	0.810902	0.0164062	0.0950876	TRUE
F8VQ29	IQ motif-containing GTPase-activating protein 3 OS=Mus musculus OX=10090 GN=Iqgap3 PE=1 SV=1	5	5	8	338.507	360.861	387.965	435.855	451.2	453.444	361.882	446.764	0.810007	0.00697926	0.0633543	TRUE
Q99KP6	Pre-mRNA-processing factor 19 OS=Mus musculus OX=10090 GN=Prpf19 PE=1 SV=1	5	7	7	1486.44	1618.65	1723.03	1359.08	1281.62	1229.23	1606.44	1288.88	1.24639	0.0131161	0.0857372	TRUE
J3QN89	Angio-associated migratory protein OS=Mus musculus OX=10090 GN=Aamp PE=1 SV=1	3	3	1	208.156	222.746	189.371	161.055	151.785	171.961	206.302	161.39	1.27828	0.0143623	0.0889317	TRUE
Q99LG0	Ubiquitin carboxyl-terminal hydrolase 16 OS=Mus musculus OX=10090 GN=Usp16 PE=1 SV=2	2	1	1	172.399	176.768	164.989	137.449	135.396	142.612	171.316	138.453	1.23736	0.00110349	0.0320409	TRUE
Q91VY9	Zinc finger protein 622 OS=Mus musculus OX=10090 GN=Znf622 PE=1 SV=1	4	2	3	690.946	754.437	704.561	574.089	482.381	543.66	716.136	531.984	1.34616	0.00682073	0.0632065	TRUE
P63147	Ubiquitin-conjugating enzyme E2 B OS=Mus musculus OX=10090 GN=Ube2b PE=1 SV=1	2	3		208.902	220.913		282.176	269.158		214.823	275.59	0.779504	0.020905	0.104494	TRUE
O35465	Peptidyl-prolyl cis-trans isomerase FKBP8 OS=Mus musculus OX=10090 GN=Fkbp8 PE=1 SV=2	6	5	8	874.418	805.513	818.931	1080.56	1129.16	1144.16	832.427	1117.63	0.744817	0.00063843	0.0270382	TRUE
Q3UQ28	Peroxidasin homolog OS=Mus musculus OX=10090 GN=Pxdn PE=1 SV=2	2	4	4	417.283	408.555	409.172	570.462	584.445	597.87	411.651	584.152	0.704699	2.08803e-05	0.00993088	TRUE
Q99L48	60S ribosomal export protein NMD3 OS=Mus musculus OX=10090 GN=Nmd3 PE=1 SV=1	1	3	3	202.201	209.302	194.653	139.013	149.763	155.785	201.963	148.023	1.36441	0.00140165	0.0334174	TRUE
Q91VX2	Ubiquitin-associated protein 2 OS=Mus musculus OX=10090 GN=Ubap2 PE=1 SV=1	5	2	3	522.87	517.128	539.71	400.321	364.893	407.478	526.483	390.445	1.34842	0.00121631	0.0320461	TRUE
Q9D0N7	Chromatin assembly factor 1 subunit B OS=Mus musculus OX=10090 GN=Chaf1b PE=1 SV=1	4	4	4	646.843	701.503	637.165	494.762	483.806	523.838	661.242	500.52	1.32111	0.00186578	0.0391897	TRUE
Q8BLF1	Neutral cholesterol ester hydrolase 1 OS=Mus musculus OX=10090 GN=Nceh1 PE=1 SV=1	4	7	7	917.055	896.738	877.918	704.032	781.99	703.468	897.095	728.919	1.23072	0.00511855	0.0569292	TRUE
Q9CQ79	Thioredoxin domain-containing protein 9 OS=Mus musculus OX=10090 GN=Txndc9 PE=1 SV=1	3	3	3	484.856	517.624	519.668	378.282	324.492	372.579	507.128	357.613	1.41809	0.00288665	0.0457877	TRUE
O08736	Caspase-12 OS=Mus musculus OX=10090 GN=Casp12 PE=1 SV=1	1	1	3	48.5202	53.3042	44.5297	56.0548	59.4416	63.76	48.6532	59.6693	0.815381	0.0330938	0.129284	TRUE
Q64337	Sequestosome-1 OS=Mus musculus OX=10090 GN=Sqstm1 PE=1 SV=1	11	8	8	1666.21	1732.61	1488.45	928.973	916.972	1187.93	1625.75	1003.96	1.61934	0.00730891	0.06443	TRUE
P29391	Ferritin light chain 1 OS=Mus musculus OX=10090 GN=Ftl1 PE=1 SV=2	4	6	7	861.141	851.376	782.295	627.617	599.491	583.989	830.849	603.431	1.37688	0.00097379	0.0305572	TRUE
Q78IK4	MICOS complex subunit Mic27 OS=Mus musculus OX=10090 GN=Apool PE=1 SV=1	1	1	1	180.843	151.148	171.38	200.625	218.845	226.659	167.323	215.096	0.7779	0.0174902	0.097878	TRUE
P07742	Ribonucleoside-diphosphate reductase large subunit OS=Mus musculus OX=10090 GN=Rrm1 PE=1 SV=2	17	16	15	2066.83	1994.1	2116.75	2660.05	2602.2	2655.73	2058.61	2639.19	0.780014	0.000186766	0.0193134	TRUE
Q61398	Procollagen C-endopeptidase enhancer 1 OS=Mus musculus OX=10090 GN=Pcolce PE=1 SV=2	10	7	7	913.914	1042	1055.11	1588.89	1445.17	1377.06	1001.59	1467.76	0.682392	0.00357294	0.0487714	TRUE
Q8BXQ2	GPI transamidase component PIG-T OS=Mus musculus OX=10090 GN=Pigt PE=1 SV=2	2	2	3	364.338	368.592	366.687	454.717	437.506	445.891	366.535	445.983	0.821858	7.24848e-05	0.0139021	TRUE
P58044	Isopentenyl-diphosphate Delta-isomerase 1 OS=Mus musculus OX=10090 GN=Idi1 PE=1 SV=1	9	10	6	1323.77	1418.66	1459.95	1931.9	1726.25	1769.22	1399.62	1806.99	0.774556	0.00469539	0.0551208	TRUE
P18653	Ribosomal protein S6 kinase alpha-1 OS=Mus musculus OX=10090 GN=Rps6ka1 PE=1 SV=1	7	3	3	286.724	309.938	297.932	262.597	248.875	206.962	298.048	238.261	1.25093	0.0413714	0.14714	TRUE
P97855	Ras GTPase-activating protein-binding protein 1 OS=Mus musculus OX=10090 GN=G3bp1 PE=1 SV=1	6	8	7	748.213	746.6	785.291	681.478	572.004	645.373	759.827	631.278	1.20363	0.0269582	0.118454	TRUE
Q9Z0W3	Nuclear pore complex protein Nup160 OS=Mus musculus OX=10090 GN=Nup160 PE=1 SV=2	5	6	6	392.876	368.194	373.55	309.129	312.501	314.698	378.06	312.101	1.21134	0.000706554	0.0270382	TRUE
Q9Z0R9	Fatty acid desaturase 2 OS=Mus musculus OX=10090 GN=Fads2 PE=1 SV=1	4	3	5	353.143	374.827	413.179	669.581	723.685	739.162	379.583	710.173	0.534493	0.000332911	0.0226201	TRUE
E9Q634	Unconventional myosin-Ie OS=Mus musculus OX=10090 GN=Myo1e PE=1 SV=1	10	14	22	1875.87	1927.11	1823.39	1476.52	1420.85	1475.2	1874.98	1457.29	1.28662	0.000245985	0.0208832	TRUE
Q9QYC7	Vitamin K-dependent gamma-carboxylase OS=Mus musculus OX=10090 GN=Ggcx PE=1 SV=1	2	3	4	345.669	339.329	332.398	452.78	447.571	458.93	339.089	453.07	0.748425	2.72611e-05	0.00993088	TRUE
O35405	Phospholipase D3 OS=Mus musculus OX=10090 GN=Pld3 PE=1 SV=1	3	4	6	484.678	511.308	490.569	755.989	738.08	727.314	495.388	740.367	0.669112	3.43335e-05	0.0100511	TRUE
P61161	Actin-related protein 2 OS=Mus musculus OX=10090 GN=Actr2 PE=1 SV=1	14	14	11	4021.4	4354.69	4497.46	3596.71	3487.94	3504.91	4286.48	3529.53	1.21446	0.00493574	0.0557998	TRUE
Q920Q4	Vacuolar protein sorting-associated protein 16 homolog OS=Mus musculus OX=10090 GN=Vps16 PE=1 SV=3	3	4	1	42.9699	54.8244	42.6271	64.086	60.2281	68.0429	46.4809	64.0395	0.725816	0.0233855	0.110088	TRUE
Q03958	Prefoldin subunit 6 OS=Mus musculus OX=10090 GN=Pfdn6 PE=1 SV=1	6	7	5	1061.68	1111.56	1198.59	997.707	911.169	878.963	1122.53	927.949	1.20969	0.0211467	0.10515	TRUE
Q91VZ6	Stromal membrane-associated protein 1 OS=Mus musculus OX=10090 GN=Smap1 PE=1 SV=1	2	1	1	45.5243	49.7456	48.7116	53.8702	57.1953	67.4406	47.9597	59.2302	0.809717	0.0432762	0.150487	TRUE
Q9JJI8	60S ribosomal protein L38 OS=Mus musculus OX=10090 GN=Rpl38 PE=1 SV=3	3	4	4	2718.15	2311.58	2454.4	1825.36	2019.32	1973.7	2489.1	1937.66	1.28459	0.011273	0.0795135	TRUE
Q62356	Follistatin-related protein 1 OS=Mus musculus OX=10090 GN=Fstl1 PE=1 SV=2	5	4	4	767.102	795.08	804.234	1392.82	1378.62	1353.28	788.646	1374.81	0.573639	4.68511e-06	0.00548626	TRUE
Q9CWU4	UPF0690 protein C1orf52 homolog OS=Mus musculus OX=10090 PE=1 SV=1	2	1	2	183.361	211.743	183.65	126.62	94.1394	149.191	192.472	121.154	1.58865	0.0317224	0.126459	TRUE
P28063	Proteasome subunit beta type-8 OS=Mus musculus OX=10090 GN=Psmb8 PE=1 SV=2	1	3	2	434.149	492.064	486.684	337.837	372.766	311.266	470.222	339.697	1.38424	0.00777574	0.0658087	TRUE
Q8VEE0	Ribulose-phosphate 3-epimerase OS=Mus musculus OX=10090 GN=Rpe PE=1 SV=1	1	1		89.994	82.3439		55.2185	61.897		86.084	58.4625	1.47247	0.0332137	0.129644	TRUE
Q64364	Tumor suppressor ARF OS=Mus musculus OX=10090 GN=Cdkn2a PE=1 SV=1	5	4	3	293.808	301.58	318.123	412.756	378.703	372.564	304.336	387.612	0.785156	0.0035905	0.0487714	TRUE
Q59IW6	ABI gene family, member 3 (NESH)-binding protein OS=Mus musculus OX=10090 GN=Abi3bp PE=1 SV=1	6	6	6	551.289	637.756	556.72	795.105	794.808	789.433	580.618	793.111	0.732076	0.00269249	0.044722	TRUE
Q3UZ39	Leucine-rich repeat flightless-interacting protein 1 OS=Mus musculus OX=10090 GN=Lrrfip1 PE=1 SV=2	12	12	21	2784.8	2921.35	2738.9	2357.78	2211.82	2447.99	2813.96	2337.16	1.20401	0.00629813	0.0618229	TRUE
P70372	ELAV-like protein 1 OS=Mus musculus OX=10090 GN=Elavl1 PE=1 SV=2	4	4	5	774.787	698.102	761.257	560.992	647.264	592.336	743.951	599.15	1.24168	0.0147451	0.089696	TRUE
A0A0R4J2C1	Amyloid-beta A4 precursor protein-binding family B member 1 OS=Mus musculus OX=10090 GN=Apbb1 PE=1 SV=1	1	2	1	21.5813	19.6299	20.9794	26.7059	29.8254	33.8626	20.714	29.9897	0.690703	0.00753114	0.0653054	TRUE
O88207	Collagen alpha-1(V) chain OS=Mus musculus OX=10090 GN=Col5a1 PE=1 SV=2	5	5		389.678	410.255		494.573	504.612		399.834	499.567	0.800361	0.015038	0.0903052	TRUE
P51881	ADP/ATP translocase 2 OS=Mus musculus OX=10090 GN=Slc25a5 PE=1 SV=3	7	7	16	5458.25	4995.65	5398.95	6263.58	6229.31	6823.45	5280.21	6433.13	0.820785	0.00824235	0.0677319	TRUE
Q9D104	Signal recognition particle 19 kDa protein OS=Mus musculus OX=10090 GN=Srp19 PE=1 SV=1	2	3	1	146.227	156.702	155.605	133.467	122.151	120.041	152.771	125.083	1.22136	0.00717409	0.0641287	TRUE
Q8CBE3	WD repeat-containing protein 37 OS=Mus musculus OX=10090 GN=Wdr37 PE=1 SV=1	4	3	4	308.85	400.77	338.267	269.908	239.679	238.021	347.244	248.783	1.39577	0.018268	0.0997288	TRUE
Q9CYN9	Renin receptor OS=Mus musculus OX=10090 GN=Atp6ap2 PE=1 SV=2	1	2	3	89.9277	88.6043	84.5702	120.915	100.567	114.109	87.6709	111.537	0.786024	0.0138065	0.0879861	TRUE
E9Q616	AHNAK nucleoprotein (desmoyokin) OS=Mus musculus OX=10090 GN=Ahnak PE=1 SV=1	199	191	223	48904.9	44851.5	46824.6	62195.2	63794.4	63964.3	46831.1	63312.9	0.739678	0.000341576	0.0226201	TRUE
Q8VEE1	LIM and cysteine-rich domains protein 1 OS=Mus musculus OX=10090 GN=Lmcd1 PE=1 SV=1	2	3	3	480.084	456.122	398.259	360.239	356.83	359.385	443.46	358.815	1.2359	0.0191979	0.101379	TRUE
P21460	Cystatin-C OS=Mus musculus OX=10090 GN=Cst3 PE=1 SV=2	6	5	6	826.92	841.351	848.547	1227.37	1245.68	1245.54	838.891	1239.5	0.676798	1.72567e-06	0.00404152	TRUE
Q91WK7	Ankyrin repeat domain-containing protein 54 OS=Mus musculus OX=10090 GN=Ankrd54 PE=1 SV=1	1	1	1	118.432	115.277	121.409	146.625	159.718	142.671	118.346	149.497	0.791629	0.00326195	0.0477468	TRUE
Q9Z0E6	Guanylate-binding protein 2 OS=Mus musculus OX=10090 GN=Gbp2 PE=1 SV=1	3	4	3	344.158	352.735	335.575	287.968	283.335	266.743	344.085	279.198	1.2324	0.0015837	0.03601	TRUE
Q3TQI7	Telomere length and silencing protein 1 homolog OS=Mus musculus OX=10090 PE=1 SV=2	1	2	1	155.652	156.689	173.752	123.279	125.248	114.653	161.823	120.971	1.3377	0.00290328	0.0457877	TRUE
Q8BU14	Translocation protein SEC62 OS=Mus musculus OX=10090 GN=Sec62 PE=1 SV=1	1	5	5	463.837	527.295	510.856	675.69	581.803	606.844	499.926	620.203	0.806069	0.0215916	0.106058	TRUE
Q9JIZ9	Phospholipid scramblase 3 OS=Mus musculus OX=10090 GN=Plscr3 PE=1 SV=1	2	1	4	88.6822	105.578	84.8549	113.382	110.933	117.847	92.6179	114.019	0.812306	0.0394613	0.143842	TRUE
P70180	Atrial natriuretic peptide receptor 3 OS=Mus musculus OX=10090 GN=Npr3 PE=1 SV=3	17	13	9	2383.05	2475.32	2523.5	3088.16	3009.43	2949.06	2459.93	3015.02	0.815892	0.000691348	0.0270382	TRUE
P35441	Thrombospondin-1 OS=Mus musculus OX=10090 GN=Thbs1 PE=1 SV=1	9	18	18	1530.39	1559.08	1499.02	2723.83	2631.77	2633.08	1529.3	2662.55	0.574375	4.20769e-06	0.00548626	TRUE
Q03173	Protein enabled homolog OS=Mus musculus OX=10090 GN=Enah PE=1 SV=2	5	2	4	356.62	318.718	306.146	244.098	274.544	266.633	326.473	261.435	1.24877	0.0183359	0.0999622	TRUE
Q9Z255	Ubiquitin-conjugating enzyme E2 A OS=Mus musculus OX=10090 GN=Ube2a PE=1 SV=1	3	1	2	305.861	334.219	338.692	455.193	413.155	427.25	325.927	431.516	0.755306	0.00279635	0.0456866	TRUE
Q9CQ22	Ragulator complex protein LAMTOR1 OS=Mus musculus OX=10090 GN=Lamtor1 PE=1 SV=1	2	4	1	234.148	224.936	235.899	180.911	203.705	187.533	231.61	190.479	1.21593	0.00684009	0.0632065	TRUE
Q9CQY6	Ubiquinol-cytochrome-c reductase complex assembly factor 2 OS=Mus musculus OX=10090 GN=Uqcc2 PE=1 SV=1	1	1	4	226.167	232.276	200.388	157.803	180.129	191.734	219.164	175.981	1.24538	0.0400604	0.144968	TRUE
Q64282	Interferon-induced protein with tetratricopeptide repeats 1 OS=Mus musculus OX=10090 GN=Ifit1 PE=1 SV=2	10	6	9	1418.52	1298.7	1431.66	1170.93	1168.8	1018.58	1381.64	1117.09	1.23682	0.0187816	0.100893	TRUE
Q91YT7	YTH domain-containing family protein 2 OS=Mus musculus OX=10090 GN=Ythdf2 PE=1 SV=1	3	2	1	693.975	722.384	815.361	633.942	593.287	585.241	742.142	603.786	1.22915	0.0191966	0.101379	TRUE
P97333	Neuropilin-1 OS=Mus musculus OX=10090 GN=Nrp1 PE=1 SV=2	1	3	3	344.992	338.706	311.225	273.337	264.252	280.13	331.311	272.495	1.21584	0.00555437	0.0591281	TRUE
Q00493	Carboxypeptidase E OS=Mus musculus OX=10090 GN=Cpe PE=1 SV=2	4	4	2	631.012	532.981	472.073	859.514	908.048	968.751	541.484	911.013	0.594376	0.00462609	0.0548572	TRUE
P50543	Protein S100-A11 OS=Mus musculus OX=10090 GN=S100a11 PE=1 SV=1	11	13	12	1981.92	2043.84	1782.2	2224.55	2337.61	2517.27	1932.7	2356.75	0.820067	0.0224666	0.108043	TRUE
O08919	Numb-like protein OS=Mus musculus OX=10090 GN=Numbl PE=1 SV=3	1	2	2	391.352	317.551	305.435	155.188	170.186	191.744	336.073	171.725	1.95704	0.0024072	0.0439238	TRUE
Q8BG30	Negative elongation factor A OS=Mus musculus OX=10090 GN=Nelfa PE=1 SV=1	1		1	69.0734		65.9478	53.4381		55.4937	67.4925	54.4562	1.23939	0.0188259	0.100893	TRUE
P53690	Matrix metalloproteinase-14 OS=Mus musculus OX=10090 GN=Mmp14 PE=2 SV=3	1	3	2	481.722	512.908	522.898	627.506	605.586	614.814	505.535	615.903	0.820802	0.00181207	0.0389155	TRUE
P20352	Tissue factor OS=Mus musculus OX=10090 GN=F3 PE=1 SV=2	3	2	3	449.587	460.811	415.962	311.757	352.239	348.919	441.703	337.126	1.3102	0.00563639	0.0593865	TRUE
Q91WV0	Protein Dr1 OS=Mus musculus OX=10090 GN=Dr1 PE=1 SV=1	2	2	3	662.495	646.065	649.726	572.421	528.27	523.008	652.724	540.788	1.20699	0.00312734	0.0466187	TRUE
P62849	40S ribosomal protein S24 OS=Mus musculus OX=10090 GN=Rps24 PE=1 SV=1	6	6	6	2411.84	2394.33	2631.11	1997.59	2047.46	2045.84	2476.8	2030.16	1.22	0.00316617	0.0467013	TRUE
P14901	Heme oxygenase 1 OS=Mus musculus OX=10090 GN=Hmox1 PE=1 SV=1	5	7	3	490.721	491.688	526.823	359.067	386.616	340.187	502.801	361.458	1.39104	0.00166339	0.0373097	TRUE
Q61112	45 kDa calcium-binding protein OS=Mus musculus OX=10090 GN=Sdf4 PE=1 SV=1	5	5	8	720.35	715.388	753.215	1232.1	1167.65	1246.76	729.46	1215.01	0.600372	3.88041e-05	0.0106917	TRUE
P28656	Nucleosome assembly protein 1-like 1 OS=Mus musculus OX=10090 GN=Nap1l1 PE=1 SV=2	6	3	8	1205.03	1345.93	1261.1	1013.64	830.499	982.817	1269.38	938.784	1.35215	0.0123913	0.0829156	TRUE
P53995	Anaphase-promoting complex subunit 1 OS=Mus musculus OX=10090 GN=Anapc1 PE=1 SV=2	11	13	6	1157.44	1271.06	1297.92	1540.51	1481.67	1554.75	1240.62	1525.31	0.813353	0.00565465	0.0593865	TRUE
Q9D0D4	Probable dimethyladenosine transferase OS=Mus musculus OX=10090 GN=Dimt1 PE=2 SV=1	2	1	1	451.085	485.485	454.184	380.752	376.558	383.954	463.328	380.409	1.21797	0.00121658	0.0320461	TRUE
Q8BGD9	Eukaryotic translation initiation factor 4B OS=Mus musculus OX=10090 GN=Eif4b PE=1 SV=1	14	16	15	3325.97	3637.89	3380	2754.19	2511.79	2789.98	3445.31	2682.41	1.28441	0.00436315	0.0529456	TRUE
Q61009	Scavenger receptor class B member 1 OS=Mus musculus OX=10090 GN=Scarb1 PE=1 SV=1	2	1	1	191.627	202.345	187.977	232.971	239.379	274.842	193.888	248.403	0.780538	0.0112788	0.0795135	TRUE
Q6XLQ8	Calumenin OS=Mus musculus OX=10090 GN=Calu PE=1 SV=1	3	29	3	5214.05	4653.76	4952.76	3656.22	4409.58	3800.84	4934.87	3942.48	1.25172	0.0270752	0.118634	TRUE
Q91X58	AN1-type zinc finger protein 2B OS=Mus musculus OX=10090 GN=Zfand2b PE=1 SV=1		1	2		165.793	165.686		137.443	133.652	165.739	135.535	1.22286	0.00479949	0.0555081	TRUE
Q9DBR7	Protein phosphatase 1 regulatory subunit 12A OS=Mus musculus OX=10090 GN=Ppp1r12a PE=1 SV=2	15	10	13	2873.08	2919.41	3103.68	2332.98	2323.39	2180.12	2963.74	2277.74	1.30117	0.0012135	0.0320461	TRUE
Q9ERG0	LIM domain and actin-binding protein 1 OS=Mus musculus OX=10090 GN=Lima1 PE=1 SV=3	6	14	11	2984.14	2065.26	2280.01	1339.78	1650.92	1533.25	2413.11	1502.42	1.60615	0.0196727	0.102613	TRUE
Q5SV77-3	Isoform 3 of Gametogenetin-binding protein 2 OS=Mus musculus OX=10090 GN=Ggnbp2		1	1		65.8492	70.2451		52.5884	52.7535	68.0116	52.6709	1.29126	0.0156415	0.0923324	TRUE
P07214	SPARC OS=Mus musculus OX=10090 GN=Sparc PE=1 SV=1	5	4	7	380.436	401.479	505.983	945.293	960.661	894.359	425.952	933.002	0.456538	0.000960938	0.0305572	TRUE
Q9R099	Transducin beta-like protein 2 OS=Mus musculus OX=10090 GN=Tbl2 PE=1 SV=2	1	3	1	271.75	262.671	275.07	216.391	210.116	223.486	269.779	216.596	1.24554	0.000621547	0.0270382	TRUE
Q9CQS5	Serine/threonine-protein kinase RIO2 OS=Mus musculus OX=10090 GN=Riok2 PE=1 SV=1	5	5	1	315.909	300.898	371.239	230.791	221.552	200.271	328.003	217.155	1.51046	0.00564812	0.0593865	TRUE
Q80UU1	Ankyrin repeat and zinc finger domain-containing protein 1 OS=Mus musculus OX=10090 GN=Ankzf1 PE=1 SV=2	1		2	44.7525		44.5542	56.7613		54.5341	44.6532	55.6366	0.802588	0.0082808	0.0677638	TRUE
A0A0R4J124	SRSF protein kinase 2 OS=Mus musculus OX=10090 GN=Srpk2 PE=1 SV=1	1		1	105.084		104.554	84.6704		78.3863	104.819	81.4678	1.28663	0.0227108	0.108592	TRUE
P06537	Glucocorticoid receptor OS=Mus musculus OX=10090 GN=Nr3c1 PE=1 SV=1	8		6	921.336		851.794	714.118		731.231	885.883	722.624	1.22593	0.0381848	0.141055	TRUE
Q7TQH0	Ataxin-2-like protein OS=Mus musculus OX=10090 GN=Atxn2l PE=1 SV=1	5		5	587.763		576.315	463.986		463.1	582.011	463.543	1.25557	0.00187962	0.0392232	TRUE
Q9Z130	Heterogeneous nuclear ribonucleoprotein D-like OS=Mus musculus OX=10090 GN=Hnrnpdl PE=1 SV=1	3		3	854.886		899.04	604.295		656.652	876.685	629.93	1.39172	0.0209255	0.104494	TRUE
Q61508	Extracellular matrix protein 1 OS=Mus musculus OX=10090 GN=Ecm1 PE=1 SV=2	3		5	568.971		544.779	724.97		796.744	556.743	760.01	0.732547	0.02676	0.118138	TRUE
B9EKS2	Jumonji domain containing 1B OS=Mus musculus OX=10090 GN=Kdm3b PE=1 SV=1	1		3	43.9139		41.7657	51.096		55.8553	42.8263	53.4227	0.801651	0.0495007	0.163238	TRUE
Q04750	DNA topoisomerase 1 OS=Mus musculus OX=10090 GN=Top1 PE=1 SV=2	1		1	123.76		109.435	162.94		172.526	116.377	167.665	0.694108	0.0328156	0.128626	TRUE
Q9DCH6	AN1-type zinc finger protein 6 OS=Mus musculus OX=10090 GN=Zfand6 PE=1 SV=1	1		2	108.287		107.688	136.621		144.577	107.987	140.543	0.768362	0.011446	0.0798518	TRUE
B1AVK5	Collagen, type IV, alpha 6 OS=Mus musculus OX=10090 GN=Col4a6 PE=1 SV=1	1		2	124.062		130.884	281.112		287.847	127.427	284.46	0.447962	0.00132572	0.0328555	TRUE
P97363	Serine palmitoyltransferase 2 OS=Mus musculus OX=10090 GN=Sptlc2 PE=1 SV=2	2		4	105.415		104.791	130.833		123.739	105.103	127.237	0.82604	0.0208422	0.1043	TRUE
Q9ER67	Maged2 protein OS=Mus musculus OX=10090 GN=Maged2 PE=1 SV=1	1		1	135.673		169.347	257.235		262.414	151.578	259.812	0.583415	0.0401106	0.144968	TRUE
P61514	60S ribosomal protein L37a OS=Mus musculus OX=10090 GN=Rpl37a PE=1 SV=2	2		3	470.415		485.366	391.277		389.53	477.832	390.402	1.22395	0.00605995	0.0607584	TRUE
Q8R3N1	Nucleolar protein 14 OS=Mus musculus OX=10090 GN=Nop14 PE=1 SV=2	1		1	80.6964		96.7725	49.4256		45.4498	88.3697	47.3961	1.86449	0.0248322	0.114077	TRUE
Q8BHS3	Pre-mRNA-splicing factor RBM22 OS=Mus musculus OX=10090 GN=Rbm22 PE=1 SV=1	4		1	487.918		525.167	409.21		375.162	506.2	391.816	1.29193	0.0460006	0.156362	TRUE
Q8BG94	COMM domain-containing protein 7 OS=Mus musculus OX=10090 GN=Commd7 PE=1 SV=1	1		1	169.615		164.889	125.09		125.3	167.235	125.195	1.3358	0.00238178	0.0439238	TRUE
Q9D1F4	Proline-rich AKT1 substrate 1 OS=Mus musculus OX=10090 GN=Akt1s1 PE=1 SV=1	1		1	140.403		131.155	111.308		108.719	135.7	110.006	1.23357	0.0282405	0.121134	TRUE
Q9ERE8	Talin rod domain-containing protein 1 OS=Mus musculus OX=10090 GN=Tlnrd1 PE=1 SV=1		1	1		333.381	330.905		261.482	260.87	332.141	261.176	1.27171	0.000264098	0.0208832	TRUE
Q5NC05	Transcription termination factor 2 OS=Mus musculus OX=10090 GN=Ttf2 PE=1 SV=2		1	2		32.8892	37.1003		23.8472	25.4569	34.9314	24.6389	1.41773	0.0364446	0.137395	TRUE
Q9CWZ3-2	Isoform 2 of RNA-binding protein 8A OS=Mus musculus OX=10090 GN=Rbm8a		3	5		969.233	940.195		1244.15	1259.94	954.603	1252.02	0.762453	0.00366494	0.0487714	TRUE
Q8C854	Myelin expression factor 2 OS=Mus musculus OX=10090 GN=Myef2 PE=1 SV=1		1	2		787.63	720.803		570.918	609.707	753.476	589.994	1.27709	0.0473248	0.158452	TRUE
P27546-2	Isoform 2 of Microtubule-associated protein 4 OS=Mus musculus OX=10090 GN=Map4		42	1		573.132	611.314		460.87	437.753	591.915	449.163	1.31782	0.0216236	0.106058	TRUE
Q9DCK3	Tetraspanin-4 OS=Mus musculus OX=10090 GN=Tspan4 PE=1 SV=1		1	1		454.669	459.246		572.762	617.839	456.952	594.874	0.76815	0.0203443	0.103579	TRUE
Q923Q2	StAR-related lipid transfer protein 13 OS=Mus musculus OX=10090 GN=Stard13 PE=1 SV=5		4	2		396.952	417.339		336.272	324.832	407.018	330.502	1.23151	0.0207059	0.104063	TRUE
F7AA26	Paralemmin A kinase anchor protein (Fragment) OS=Mus musculus OX=10090 GN=Pakap PE=1 SV=1		11	7		1666.71	1656.64		1150.02	1124.6	1661.67	1137.24	1.46114	0.000930717	0.0304948	TRUE
Q91WE4	UPF0729 protein C18orf32 homolog OS=Mus musculus OX=10090 PE=3 SV=1		1	1		233.116	248.093		304.479	297.776	240.488	301.109	0.798675	0.0209533	0.104521	TRUE
Q8BJL0	SWI/SNF-related matrix-associated actin-dependent regulator of chromatin subfamily A-like protein 1 OS=Mus musculus OX=10090 GN=Smarcal1 PE=1 SV=1		2	2		122.856	117.533		148.304	147.261	120.165	147.782	0.813127	0.0115481	0.0802544	TRUE
Q9DCX1	MAD2L1-binding protein OS=Mus musculus OX=10090 GN=Mad2l1bp PE=1 SV=2		1	1		89.0568	79.7		109.687	114.724	84.2486	112.177	0.751033	0.0410555	0.146797	TRUE
Q99LH1	Nucleolar GTP-binding protein 2 OS=Mus musculus OX=10090 GN=Gnl2 PE=1 SV=2		1	1		91.8837	83.4143		54.1197	57.2578	87.5467	55.6666	1.5727	0.0149359	0.0900384	TRUE
Q64429	Cytochrome P450 1B1 OS=Mus musculus OX=10090 GN=Cyp1b1 PE=1 SV=3		1	1		148.34	157.075		196.24	206.559	152.645	201.333	0.758173	0.0187055	0.100708	TRUE
Q9CZ57	5-methylcytosine rRNA methyltransferase NSUN4 OS=Mus musculus OX=10090 GN=Nsun4 PE=1 SV=1		1	1		111.125	115.42		153.884	154.509	113.252	154.196	0.73447	0.00379648	0.049211	TRUE
P08122	Collagen alpha-2(IV) chain OS=Mus musculus OX=10090 GN=Col4a2 PE=1 SV=4		3	2		437.529	413.3		530.545	546.111	425.242	538.272	0.790014	0.0178757	0.0991456	TRUE
Q9D7Z3	Nucleolar protein 7 OS=Mus musculus OX=10090 GN=Nol7 PE=1 SV=1		1	1		29.4622	27.303		21.9937	19.542	28.3621	20.7317	1.36806	0.0468003	0.157934	TRUE
Q9DD24	Transcription elongation factor A protein-like 9 OS=Mus musculus OX=10090 GN=Tceal9 PE=3 SV=1		1	1		21.4408	15.3381		38.4411	40.1501	18.1346	39.2863	0.4616	0.0445601	0.152908	TRUE
Q8K1J5	Replication stress response regulator SDE2 OS=Mus musculus OX=10090 GN=Sde2 PE=1 SV=1		1	1		161.806	168.041		222.336	231.654	164.894	226.947	0.726574	0.00754696	0.0653054	TRUE
Q64701	Retinoblastoma-like protein 1 OS=Mus musculus OX=10090 GN=Rbl1 PE=1 SV=3		1	2		76.6085	74.6376		93.5681	105.095	75.6166	99.1644	0.762538	0.0449932	0.153943	TRUE
Q8C145	Zinc transporter ZIP6 OS=Mus musculus OX=10090 GN=Slc39a6 PE=1 SV=1		2	1		199.668	199.258		158.342	171.122	199.463	164.608	1.21174	0.0385159	0.141386	TRUE
P52482	Ubiquitin-conjugating enzyme E2 E1 OS=Mus musculus OX=10090 GN=Ube2e1 PE=1 SV=1		1	1		9.98707	9.64301		5.13199	5.66805	9.81353	5.39337	1.81956	0.00765571	0.0655564	TRUE
Q8VEA4	Mitochondrial intermembrane space import and assembly protein 40 OS=Mus musculus OX=10090 GN=Chchd4 PE=1 SV=1		1	1		80.5168	88.7726		45.1647	38.2792	84.544	41.5797	2.0333	0.0178233	0.0991456	TRUE
B2RXC8	3222402P14Rik protein OS=Mus musculus OX=10090 GN=Ppp2r3a PE=1 SV=1		2	5		388.329	369.151		469.144	477.135	378.619	473.123	0.800255	0.0140508	0.088544	TRUE
A0A1Y7VK55	Nuclear factor 1 OS=Mus musculus OX=10090 GN=Nfic PE=1 SV=1		1	1		375.952	388.248		257.014	275.436	382.051	266.065	1.43593	0.0109476	0.078458	TRUE
B8JJN0	Uncharacterized protein OS=Mus musculus OX=10090 GN=Gm20547 PE=3 SV=1		2	1		643.293	669.666		308.488	291.976	656.347	300.119	2.18696	0.00188917	0.0392232	TRUE
E9Q5C9	Nucleolar and coiled-body phosphoprotein 1 OS=Mus musculus OX=10090 GN=Nolc1 PE=1 SV=1		3	2		390.067	389.064		474.468	480.844	389.565	477.645	0.815596	0.00111023	0.0320409	TRUE
Q9CR50	RING finger and CHY zinc finger domain-containing protein 1 OS=Mus musculus OX=10090 GN=Rchy1 PE=1 SV=1		1	1		149.597	143.017		199.541	197.905	146.27	198.721	0.736056	0.0055209	0.0591281	TRUE
E9Q6J5-3	Isoform New of Biorientation of chromosomes in cell division protein 1-like 1 OS=Mus musculus OX=10090 GN=Bod1l		1	2		319.656	344.555		273.236	263.691	331.872	268.421	1.23638	0.0361953	0.137057	TRUE
Q9Z0U0	Xenotropic and polytropic retrovirus receptor 1 OS=Mus musculus OX=10090 GN=Xpr1 PE=1 SV=1		1	1		12.4048	10.8075		16.38	16.7142	11.5786	16.5462	0.699774	0.0360276	0.136724	TRUE
P63166	Small ubiquitin-related modifier 1 OS=Mus musculus OX=10090 GN=Sumo1 PE=1 SV=1		2	2		340.747	364.905		652.757	609.612	352.619	630.816	0.558989	0.00685177	0.0632065	TRUE
Q9CR75	Tumor necrosis factor receptor superfamily member 12A OS=Mus musculus OX=10090 GN=Tnfrsf12a PE=2 SV=1	1	1		22.5634	26.2686		15.2042	16.9725		24.3456	16.064	1.51554	0.0473515	0.158452	TRUE
Q9EST3	Eukaryotic translation initiation factor 4E transporter OS=Mus musculus OX=10090 GN=Eif4enif1 PE=1 SV=2	2	1		32.1609	32.3644		25.3398	23.9353		32.2625	24.6276	1.31002	0.011096	0.0789753	TRUE
Q3UPF5	Zinc finger CCCH-type antiviral protein 1 OS=Mus musculus OX=10090 GN=Zc3hav1 PE=1 SV=1	5	5		1062.29	977.783		764.798	725.677		1019.16	744.981	1.36803	0.0236446	0.111078	TRUE
E1U8D0	Protein SOGA1 OS=Mus musculus OX=10090 GN=Soga1 PE=1 SV=3	1	1		155.235	146.04		189.127	195.733		150.567	192.401	0.782568	0.0198043	0.102695	TRUE
Q505K2	Protein FAM160A1 OS=Mus musculus OX=10090 GN=Fam160a1 PE=1 SV=2	1	1		94.928	101.718		129.922	130.139		98.2645	130.03	0.755705	0.0148797	0.0900283	TRUE
P02301	Histone H3.3C OS=Mus musculus OX=10090 GN=H3f3c PE=3 SV=3	3	4		1286.62	1154.37		1610.4	1663.63		1218.7	1636.8	0.744565	0.0349271	0.134083	TRUE
F2Z446	Vacuolar ATPase assembly integral membrane protein VMA21 OS=Mus musculus OX=10090 GN=Vma21 PE=1 SV=1	1	1		17.3053	18.3229		22.2239	22.5951		17.8068	22.4087	0.794637	0.0163359	0.0949345	TRUE
Q8C9B9	Death-inducer obliterator 1 OS=Mus musculus OX=10090 GN=Dido1 PE=1 SV=4	1	1		63.1754	72.9606		123.83	127.152		67.8919	125.48	0.541058	0.0139103	0.0883238	TRUE
A0A0G2JDJ5	Farnesyl pyrophosphate synthase (Fragment) OS=Mus musculus OX=10090 GN=Fdps PE=4 SV=1	1	1		373.584	391.361		518.456	477.66		382.369	497.64	0.768364	0.0305125	0.124713	TRUE
Q9CR51	V-type proton ATPase subunit G 1 OS=Mus musculus OX=10090 GN=Atp6v1g1 PE=1 SV=3	1	1		588.466	579.919		709.711	707.28		584.177	708.495	0.824532	0.00151311	0.0349133	TRUE
Q6P1E1	Zinc finger MIZ domain-containing protein 1 OS=Mus musculus OX=10090 GN=Zmiz1 PE=1 SV=1	1	1		174.114	176.605		134.888	144.842		175.355	139.776	1.25454	0.024678	0.113772	TRUE
Q9Z0V7	Mitochondrial import inner membrane translocase subunit Tim17-B OS=Mus musculus OX=10090 GN=Timm17b PE=1 SV=1	2	1		276.685	257.882		334.084	323.058		267.118	328.525	0.813081	0.0337107	0.130821	TRUE
A0A2I3BR29	Protein FAM107B OS=Mus musculus OX=10090 GN=Fam107b PE=1 SV=1	2	2		688.266	645.463		526.834	528.505		666.521	527.669	1.26314	0.0184118	0.0999622	TRUE
Q8BIQ5	Cleavage stimulation factor subunit 2 OS=Mus musculus OX=10090 GN=Cstf2 PE=1 SV=2	4	6		1148.36	1114.42		872.319	914.322		1131.26	893.073	1.26671	0.0136323	0.0875911	TRUE
Q61805	Lipopolysaccharide-binding protein OS=Mus musculus OX=10090 GN=Lbp PE=1 SV=2	1	1		235.776	226.066		412.52	411.565		230.87	412.042	0.560306	0.001319	0.0328555	TRUE
Q91VJ5	Polyglutamine-binding protein 1 OS=Mus musculus OX=10090 GN=Pqbp1 PE=1 SV=1	2	1		347.744	399.011		225.237	204.787		372.496	214.769	1.73441	0.0222928	0.107483	TRUE
Q9JKB3	Y-box-binding protein 3 OS=Mus musculus OX=10090 GN=Ybx3 PE=1 SV=2	2	3		293.028	283.885		239.773	240.202		288.42	239.988	1.20181	0.00737506	0.0646906	TRUE
A0A140LHU0	Disintegrin and metalloproteinase domain-containing protein 9 OS=Mus musculus OX=10090 GN=Adam9 PE=1 SV=1	1	1		368.418	404.548		544.073	521.794		386.061	532.817	0.724566	0.0243686	0.112656	TRUE
E9Q450	Tropomyosin alpha-1 chain OS=Mus musculus OX=10090 GN=Tpm1 PE=1 SV=1	28	32		12363.3	11963.1		14891.7	15466.8		12161.6	15176.5	0.80134	0.0125961	0.0833719	TRUE
Q9D2C7	Bax inhibitor 1 OS=Mus musculus OX=10090 GN=Tmbim6 PE=1 SV=1	1	1		105.891	125.261		250.647	244.839		115.169	247.726	0.464907	0.0120391	0.0822029	TRUE
P61327	Protein mago nashi homolog OS=Mus musculus OX=10090 GN=Magoh PE=2 SV=1	4	5		936.815	986.019		1196.63	1131.46		961.102	1163.59	0.82598	0.037193	0.13937	TRUE
Q61468	Mesothelin OS=Mus musculus OX=10090 GN=Msln PE=1 SV=1	3	1		288.45	297.241		370.583	343.735		292.812	356.906	0.820418	0.0393844	0.143842	TRUE
Q01721	Growth arrest-specific protein 1 OS=Mus musculus OX=10090 GN=Gas1 PE=2 SV=2	2	1		132.919	143.659		190.627	180.124		138.184	185.301	0.745729	0.0258292	0.115421	TRUE
P0DN34	NADH dehydrogenase [ubiquinone] 1 beta subcomplex subunit 1 OS=Mus musculus OX=10090 GN=Ndufb1 PE=3 SV=1	1	1		163.419	181.107		223.636	220.93		172.036	222.279	0.773964	0.0384467	0.141386	TRUE
E9QKG3	tRNA (guanine(10)-N2)-methyltransferase homolog OS=Mus musculus OX=10090 GN=Trmt11 PE=1 SV=1	4	4		226.821	237.416		175.118	193.022		232.058	183.852	1.2622	0.049385	0.163186	TRUE
O09164	Extracellular superoxide dismutase [Cu-Zn] OS=Mus musculus OX=10090 GN=Sod3 PE=1 SV=1	1	1		60.3403	64.2678		114.108	105.332		62.2731	109.632	0.568019	0.00801478	0.0667994	TRUE
